# Supplementary material for: Limonoids Containing a C1–O–C29 Moiety: Isolation, Structural Modification, and Antiviral Activity
Source: MDPI journal article supplement (doi:10.3390/md16110434), 2018-11-04

# Supporting Information-II

**Copies of ESIMS, 1D and 2D NMR spectra of compounds 7–10, 8a–8i, 9a–9b, and 10a–10c.**

## Table of Contents:

|                                                                                             |         |
|---------------------------------------------------------------------------------------------|---------|
| 1. LR-ESIMS for compound <b>7</b> .....                                                     | S6      |
| 2. <sup>1</sup> H NMR (400 MHz) spectrum of compound <b>7</b> in CD <sub>3</sub> OD.....    | S7-S10  |
| 3. <sup>13</sup> C NMR (100 MHz) spectrum of compound <b>7</b> in CD <sub>3</sub> OD.....   | S11-S14 |
| 4. DEPT 135 spectrum of compound <b>7</b> in CD <sub>3</sub> OD.....                        | S15-S18 |
| 5. LR-ESIMS for compound <b>8</b> .....                                                     | S19     |
| 6. <sup>1</sup> H NMR (400 MHz) spectrum of compound <b>8</b> in CDCl <sub>3</sub> .....    | S20-S23 |
| 7. <sup>13</sup> C NMR (100 MHz) spectrum of compound <b>8</b> in CDCl <sub>3</sub> .....   | S24-S26 |
| 8. DEPT 135 spectrum of compound <b>8</b> in CDCl <sub>3</sub> .....                        | S27-S30 |
| 9. HR-ESIMS for compound <b>8a</b> .....                                                    | S31-S32 |
| 10. <sup>1</sup> H NMR (400 MHz) spectrum of compound <b>8a</b> in CDCl <sub>3</sub> .....  | S33-S35 |
| 11. <sup>13</sup> C NMR (100 MHz) spectrum of compound <b>8a</b> in CDCl <sub>3</sub> ..... | S36-S39 |
| 12. DEPT 135 spectrum of compound <b>8a</b> in CDCl <sub>3</sub> .....                      | S40-S43 |
| 13. HR-ESIMS for compound <b>8b</b> .....                                                   | S44-S45 |
| 14. <sup>1</sup> H NMR (400 MHz) spectrum of compound <b>8b</b> in CDCl <sub>3</sub> .....  | S46-S48 |
| 15. <sup>13</sup> C NMR (100 MHz) spectrum of compound <b>8b</b> in CDCl <sub>3</sub> ..... | S49-S52 |
| 16. DEPT 135 spectrum of compound <b>8b</b> in CDCl <sub>3</sub> .....                      | S53-S56 |
| 17. LR-ESIMS for compound <b>8c</b> .....                                                   | S57     |
| 18. <sup>1</sup> H NMR (400 MHz) spectrum of compound <b>8c</b> in CDCl <sub>3</sub> .....  | S58-S60 |
| 19. <sup>13</sup> C NMR (100 MHz) spectrum of compound <b>8c</b> in CDCl <sub>3</sub> ..... | S61-S64 |
| 20. DEPT 135 spectrum of compound <b>8c</b> in CDCl <sub>3</sub> .....                      | S65-S68 |
| 21. HR-ESIMS for compound <b>8d</b> .....                                                   | S69-S70 |
| 22. <sup>1</sup> H NMR (400 MHz) spectrum of compound <b>8d</b> in CDCl <sub>3</sub> .....  | S71-S73 |



|                                                                                           |           |
|-------------------------------------------------------------------------------------------|-----------|
| 23. $^{13}\text{C}$ NMR (100 MHz) spectrum of compound <b>8d</b> in $\text{CDCl}_3$ ..... | S74-S77   |
| 24. DEPT 135 spectrum of compound <b>8d</b> in $\text{CDCl}_3$ .....                      | S78-S81   |
| 25. HR-ESIMS for compound <b>8e</b> .....                                                 | S82-S83   |
| 26. $^1\text{H}$ NMR (400 MHz) spectrum of compound <b>8e</b> in $\text{CDCl}_3$ .....    | S84-S86   |
| 27. $^{13}\text{C}$ NMR (100 MHz) spectrum of compound <b>8e</b> in $\text{CDCl}_3$ ..... | S87-S91   |
| 28. DEPT 135 spectrum of compound <b>8e</b> in $\text{CDCl}_3$ .....                      | S92-S95   |
| 29. HR-ESIMS for compound <b>8f</b> .....                                                 | S96-S97   |
| 30. $^1\text{H}$ NMR (400 MHz) spectrum of compound <b>8f</b> in $\text{CDCl}_3$ .....    | S98-S100  |
| 31. $^{13}\text{C}$ NMR (100 MHz) spectrum of compound <b>8f</b> in $\text{CDCl}_3$ ..... | S101-S104 |
| 32. DEPT 135 spectrum of compound <b>8f</b> in $\text{CDCl}_3$ .....                      | S105-S108 |
| 33. HR-ESIMS for compound <b>8g</b> .....                                                 | S109-S110 |
| 34. $^1\text{H}$ NMR (400 MHz) spectrum of compound <b>8g</b> in $\text{CDCl}_3$ .....    | S111-S113 |
| 35. $^{13}\text{C}$ NMR (100 MHz) spectrum of compound <b>8g</b> in $\text{CDCl}_3$ ..... | S114-S117 |
| 36. DEPT 135 spectrum of compound <b>8g</b> in $\text{CDCl}_3$ .....                      | S118-S122 |
| 37. HR-ESIMS for compound <b>8h</b> .....                                                 | S123-S124 |
| 38. $^1\text{H}$ NMR (400 MHz) spectrum of compound <b>8h</b> in $\text{CDCl}_3$ .....    | S125-S127 |
| 39. $^{13}\text{C}$ NMR (100 MHz) spectrum of compound <b>8h</b> in $\text{CDCl}_3$ ..... | S128-S131 |
| 40. DEPT 135 spectrum of compound <b>8h</b> in $\text{CDCl}_3$ .....                      | S132-S135 |
| 41. HR-ESIMS for compound <b>8i</b> .....                                                 | S136-S137 |
| 42. $^1\text{H}$ NMR (400 MHz) spectrum of compound <b>8i</b> in $\text{CDCl}_3$ .....    | S138-S140 |
| 43. $^{13}\text{C}$ NMR (100 MHz) spectrum of compound <b>8i</b> in $\text{CDCl}_3$ ..... | S141-S144 |
| 44. DEPT 135 spectrum of compound <b>8i</b> in $\text{CDCl}_3$ .....                      | S145-S149 |
| 45. LR-ESIMS for compound <b>9</b> .....                                                  | S150      |

|                                                                                                       |           |
|-------------------------------------------------------------------------------------------------------|-----------|
| 46. $^1\text{H}$ NMR (400 MHz) spectrum of compound <b>9</b> in $\text{CDCl}_3$ .....                 | S151-S154 |
| 47. $^{13}\text{C}$ NMR (100 MHz) spectrum of compound <b>9</b> in $\text{CDCl}_3$ .....              | S155-S158 |
| 48. DEPT 135 spectrum of compound <b>9</b> in $\text{CDCl}_3$ .....                                   | S159-S164 |
| 49. LR-ESIMS for compound <b>9a</b> .....                                                             | S165      |
| 50. $^1\text{H}$ NMR (400 MHz) spectrum of compound <b>9a</b> in $\text{CDCl}_3$ .....                | S166-S168 |
| 51. $^{13}\text{C}$ NMR (100 MHz) spectrum of compound <b>9a</b> in $\text{CDCl}_3$ .....             | S169-S171 |
| 52. DEPT 135 spectrum of compound <b>9a</b> in $\text{CDCl}_3$ .....                                  | S172-S175 |
| 53. LR-ESIMS for compound <b>9b</b> .....                                                             | S176      |
| 54. $^1\text{H}$ NMR (400 MHz) spectrum of compound <b>9b</b> in $\text{CDCl}_3$ .....                | S177-S180 |
| 55. $^{13}\text{C}$ NMR (100 MHz) spectrum of compound <b>9b</b> in $\text{CDCl}_3$ .....             | S181-S183 |
| 56. DEPT 135 spectrum of compound <b>9b</b> in $\text{CDCl}_3$ .....                                  | S184-S187 |
| 57. LR-ESIMS for compound <b>10</b> .....                                                             | S188      |
| 58. $^1\text{H}$ NMR (400 MHz) spectrum of compound <b>10</b> in $(\text{CD}_3)_2\text{CO}$ .....     | S189-S192 |
| 59. $^{13}\text{C}$ NMR (100 MHz) spectrum of compound <b>10</b> in $(\text{CD}_3)_2\text{CO}$ .....  | S193-S196 |
| 60. DEPT 135 spectrum of compound <b>10</b> in $(\text{CD}_3)_2\text{CO}$ .....                       | S197-S199 |
| 61. LR-ESIMS for compound <b>10a</b> .....                                                            | S200      |
| 62. $^1\text{H}$ NMR (400 MHz) spectrum of compound <b>10a</b> in $(\text{CD}_3)_2\text{CO}$ .....    | S201-S203 |
| 63. $^{13}\text{C}$ NMR (100 MHz) spectrum of compound <b>10a</b> in $(\text{CD}_3)_2\text{CO}$ ..... | S204-S206 |
| 64. DEPT 135 spectrum of compound <b>10a</b> in $(\text{CD}_3)_2\text{CO}$                            | S207-S209 |
| 65. Positive LR-ESIMS for compound <b>10b</b> .....                                                   | S210      |
| 66. $^1\text{H}$ NMR (400 MHz) spectrum of compound <b>10b</b> in $(\text{CD}_3)_2\text{CO}$ .....    | S211-S213 |
| 67. $^{13}\text{C}$ NMR (100 MHz) spectrum of compound <b>10b</b> in $(\text{CD}_3)_2\text{CO}$ ..... | S214-S216 |
| 68. DEPT 135 spectrum of compound <b>10b</b> in $(\text{CD}_3)_2\text{CO}$ .....                      | S217-S219 |

|                                                                                                       |           |
|-------------------------------------------------------------------------------------------------------|-----------|
| 61. LR-ESIMS for compound <b>10c</b> .....                                                            | S220      |
| 62. $^1\text{H}$ NMR (400 MHz) spectrum of compound <b>10c</b> in $(\text{CD}_3)_2\text{CO}$ .....    | S221-S223 |
| 63. $^{13}\text{C}$ NMR (100 MHz) spectrum of compound <b>10c</b> in $(\text{CD}_3)_2\text{CO}$ ..... | S224-S226 |
| 64. DEPT 135 spectrum of compound <b>10c</b> in $(\text{CD}_3)_2\text{CO}$ .....                      | S227-S229 |

## LR-ESIMS for compound 7

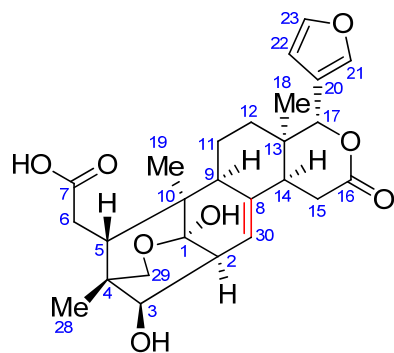

7

Chemical Formula:  $C_{26}H_{32}O_8$

Exact Mass: 472.20972

### Generic Display Report

#### Analysis Info

Analysis Name D:\MS\RJL\180915\62-2018-09-1520-31-45.D

Method DEF\_LC.M

Sample Name 62

Comment

Acquisition D 2018/9/15 20:32:00

Operator

Instrument LCMSSD

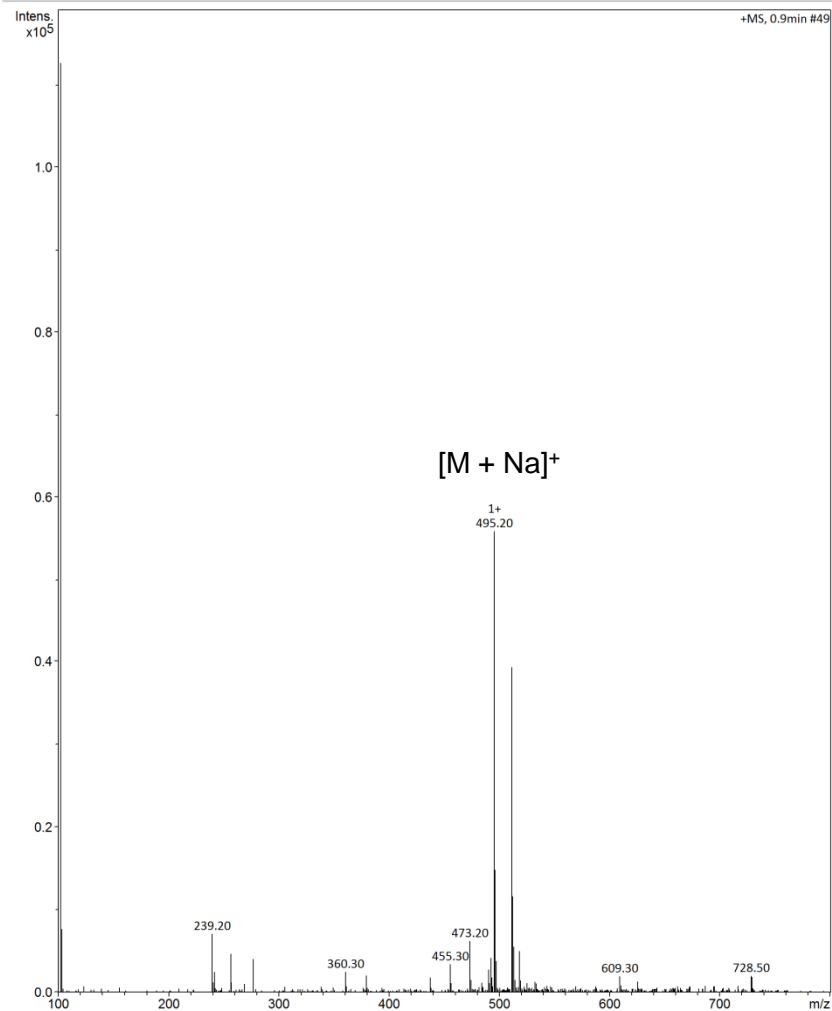

Bruker Compass DataAnalysis

# <sup>1</sup>H NMR (400 MHz) spectrum of **7** in CD<sub>3</sub>OD

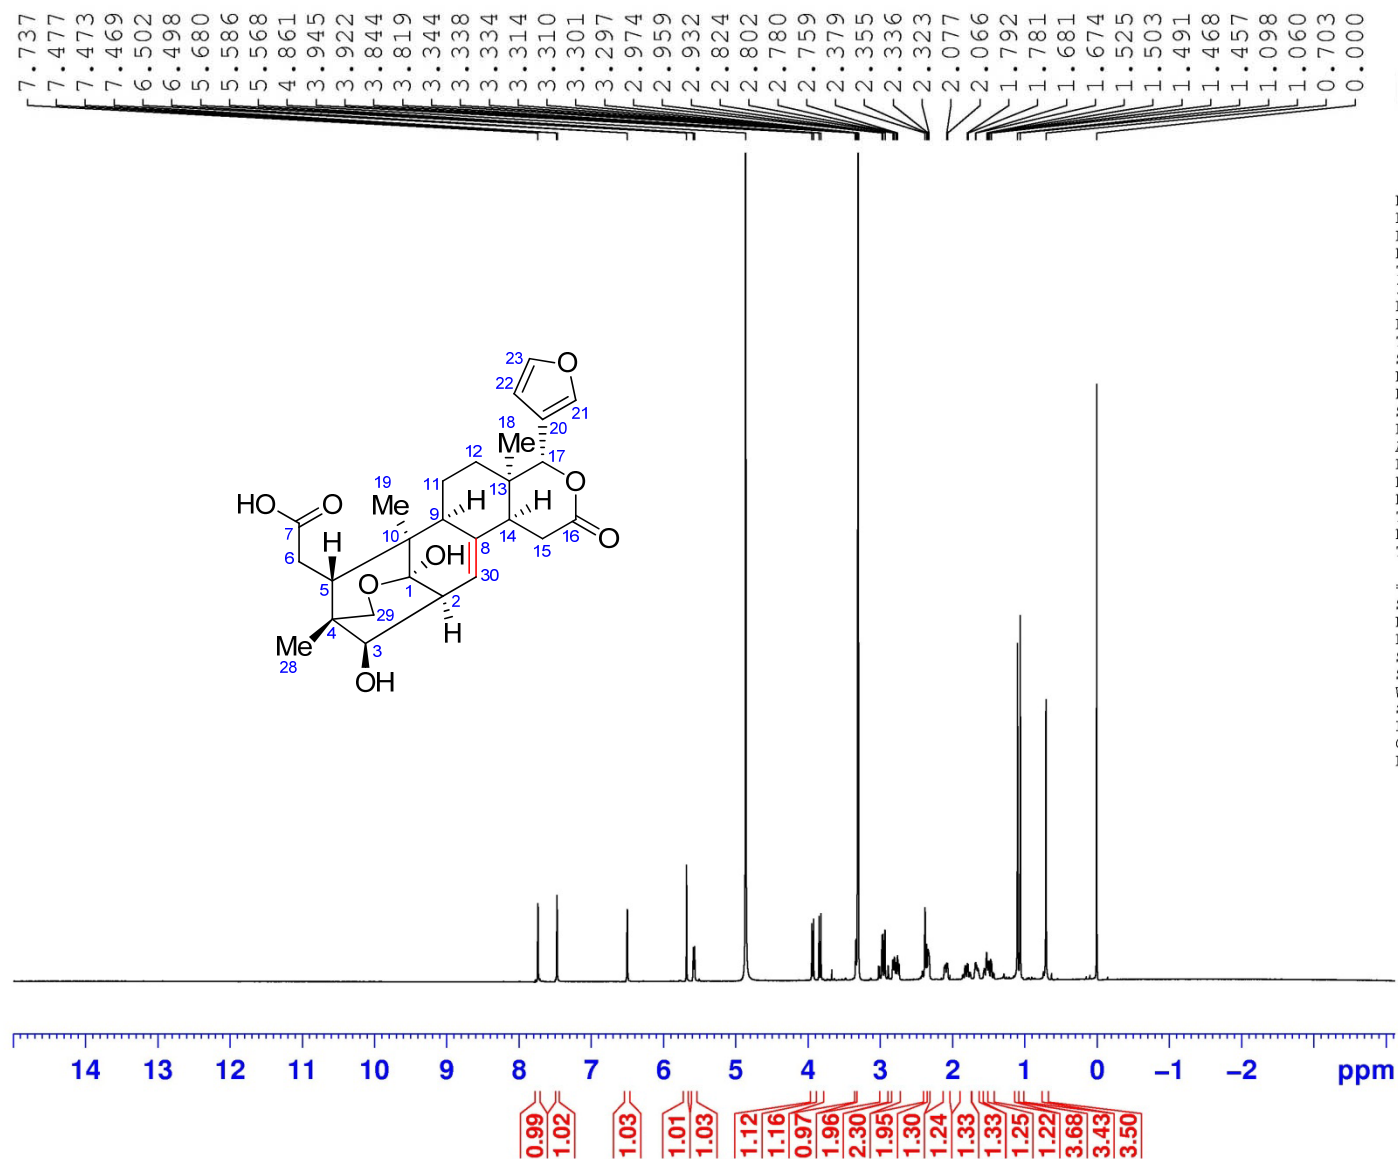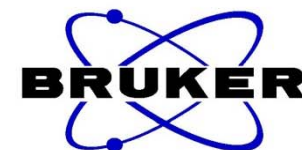

```

NAME          czc-1
EXPNO          101
PROCNO          1
Date_          20170518
Time           20.30
INSTRUM         spect
PROBHD          5 mm CPPBBO BB
PULPROG         zg30
TD             65536
SOLVENT         CD3OD_SPE
NS              16
DS              2
SWH             8223.685 Hz
FIDRES          0.125483 Hz
AQ             3.9846387 sec
RG              208.5
DW             60.800 usec
DE             10.00 usec
TE             297.0 K
D1             1.00000000 sec
TD0            1

===== CHANNEL f1 =====
SF01          400.1324710 MHz
NUC1           1H
P1            11.50 usec
SI            65536
SF            400.1300095 MHz
WDW            EM
SSB            0
LB            0.30 Hz
GB            0
PC            1.00
    
```

$^1\text{H}$  NMR (400 MHz) spectrum of **7** in  $\text{CD}_3\text{OD}$

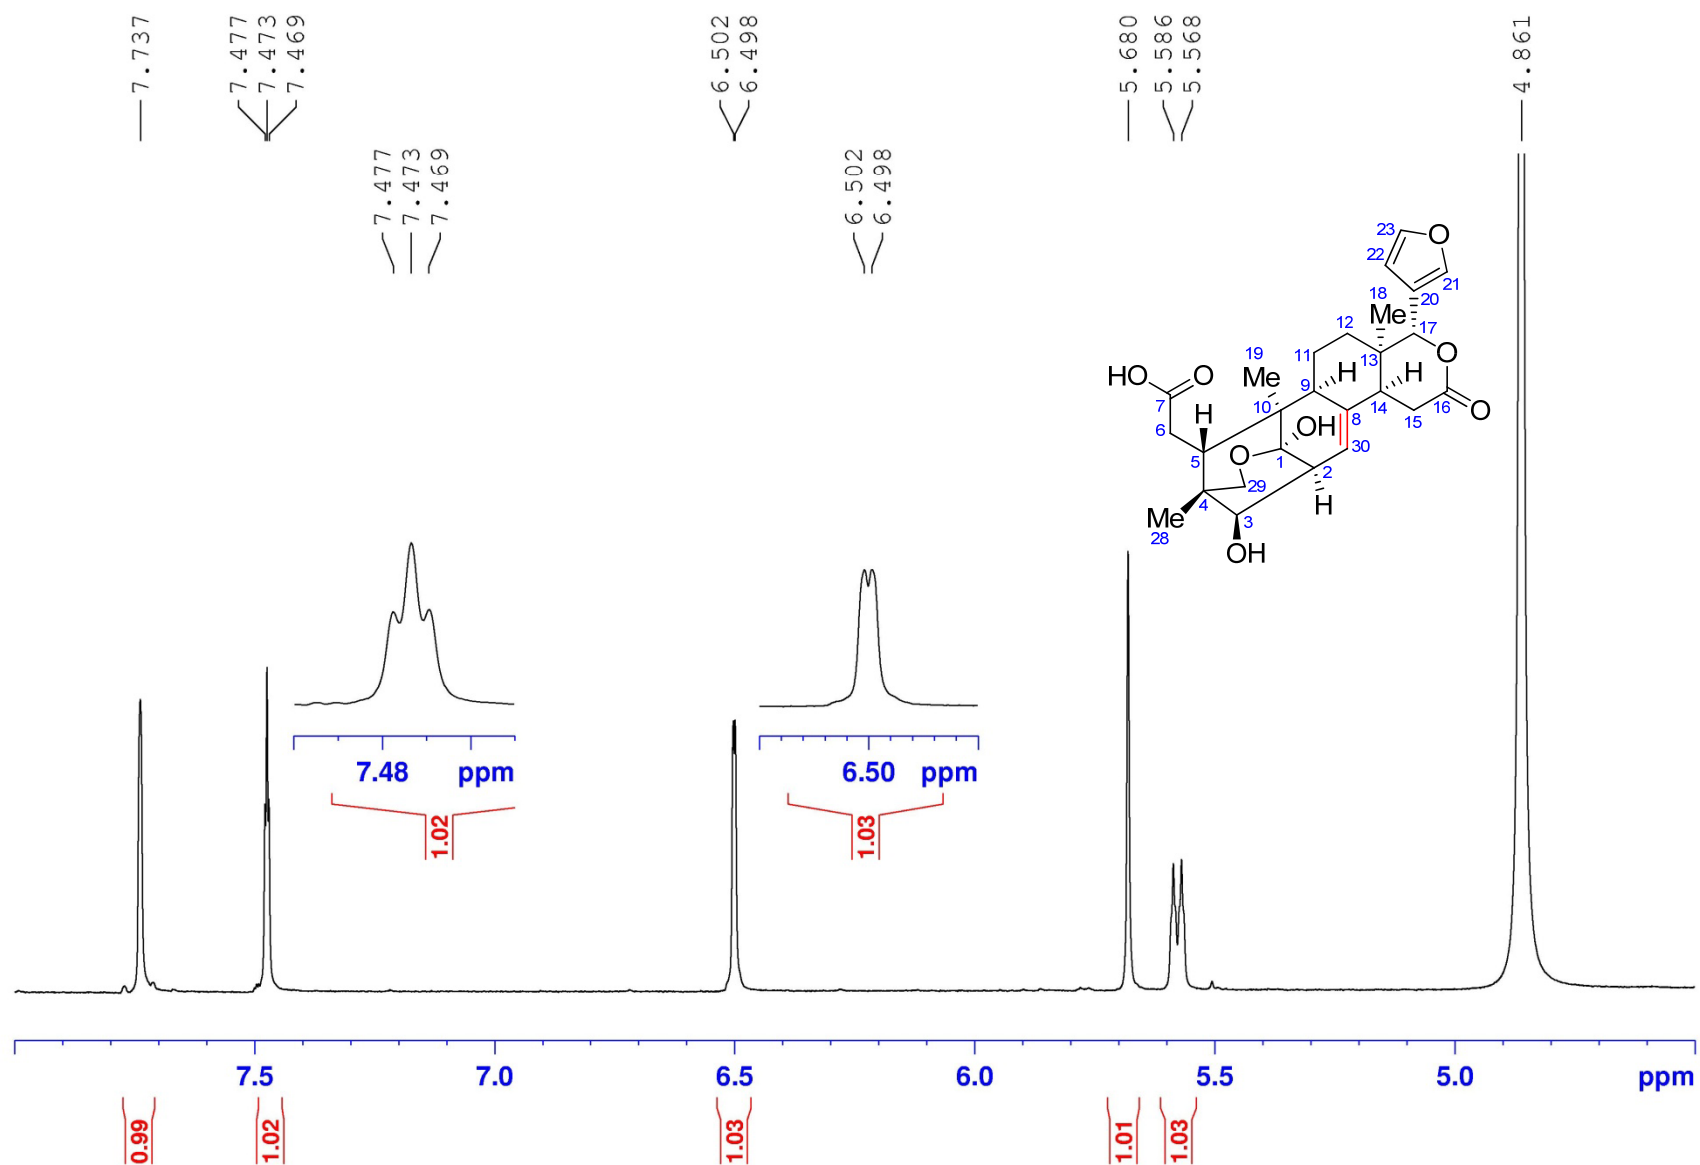

$^1\text{H}$  NMR (400 MHz) spectrum of **7** in  $\text{CD}_3\text{OD}$

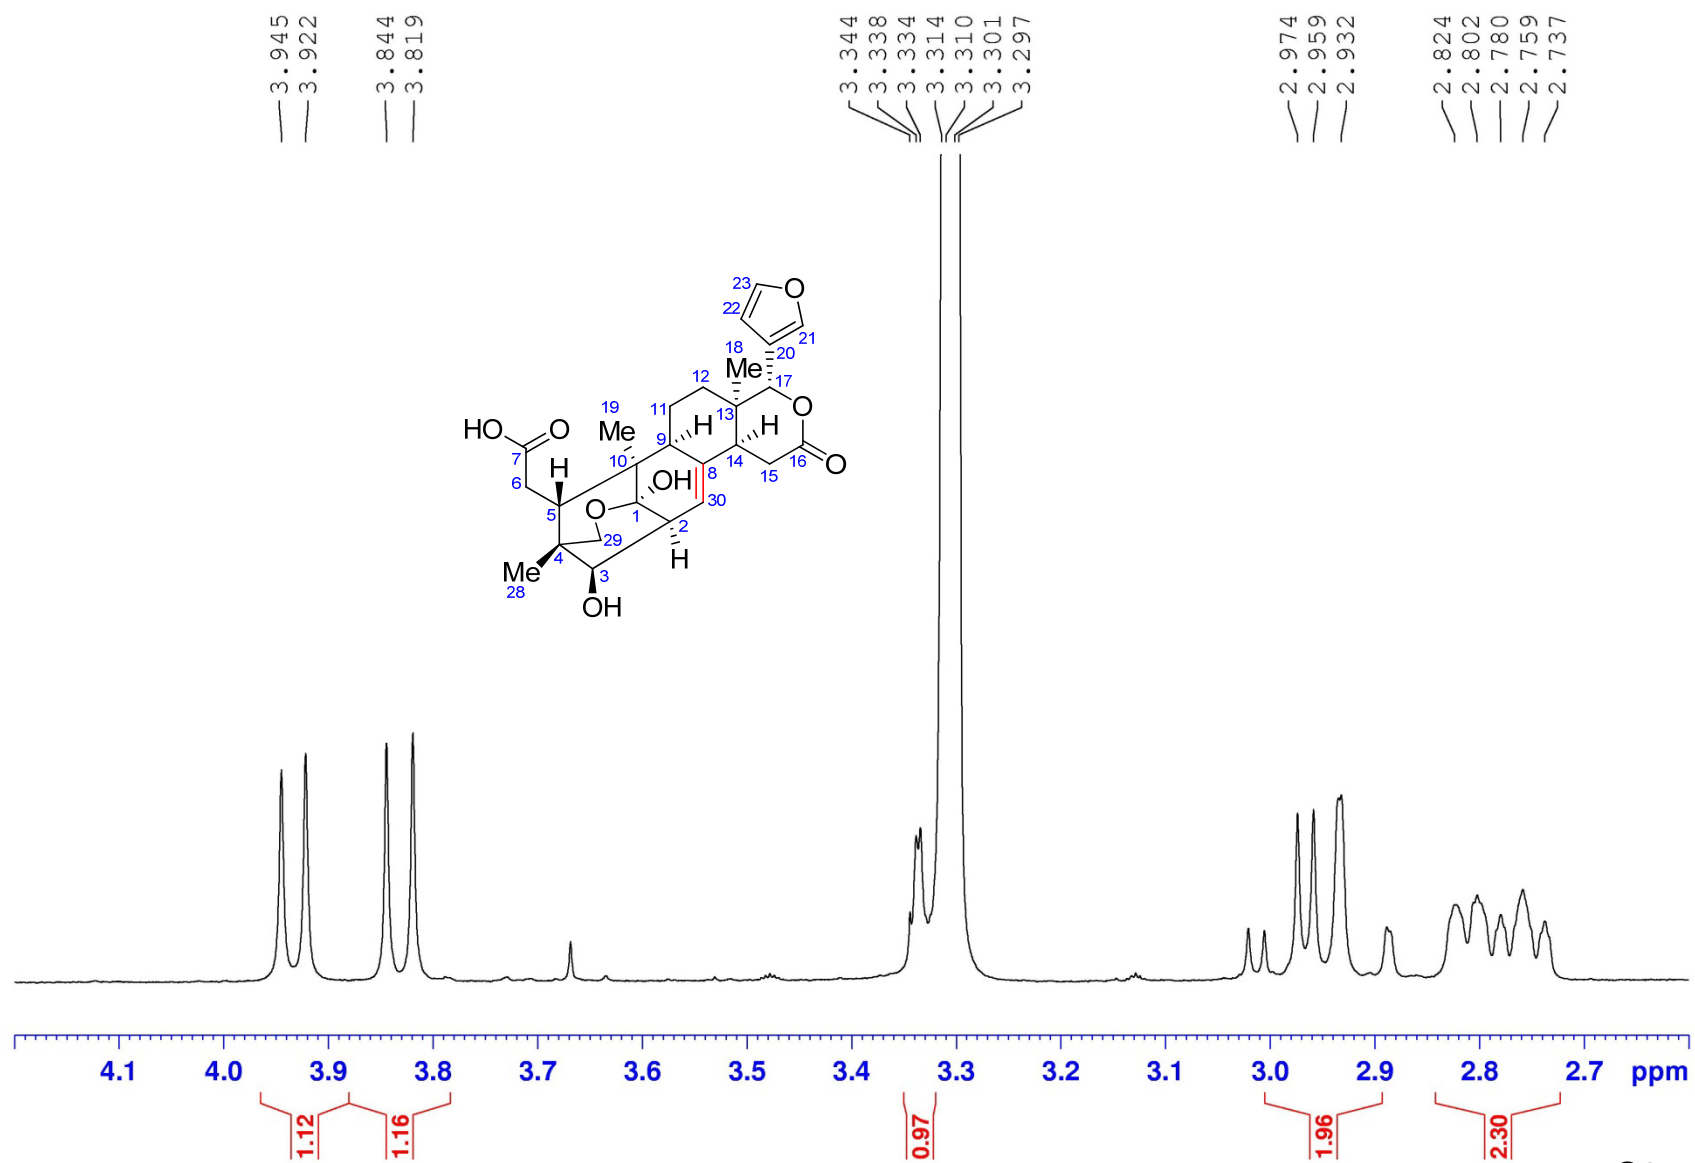

$^1\text{H}$  NMR (400 MHz) spectrum of **7** in  $\text{CD}_3\text{OD}$

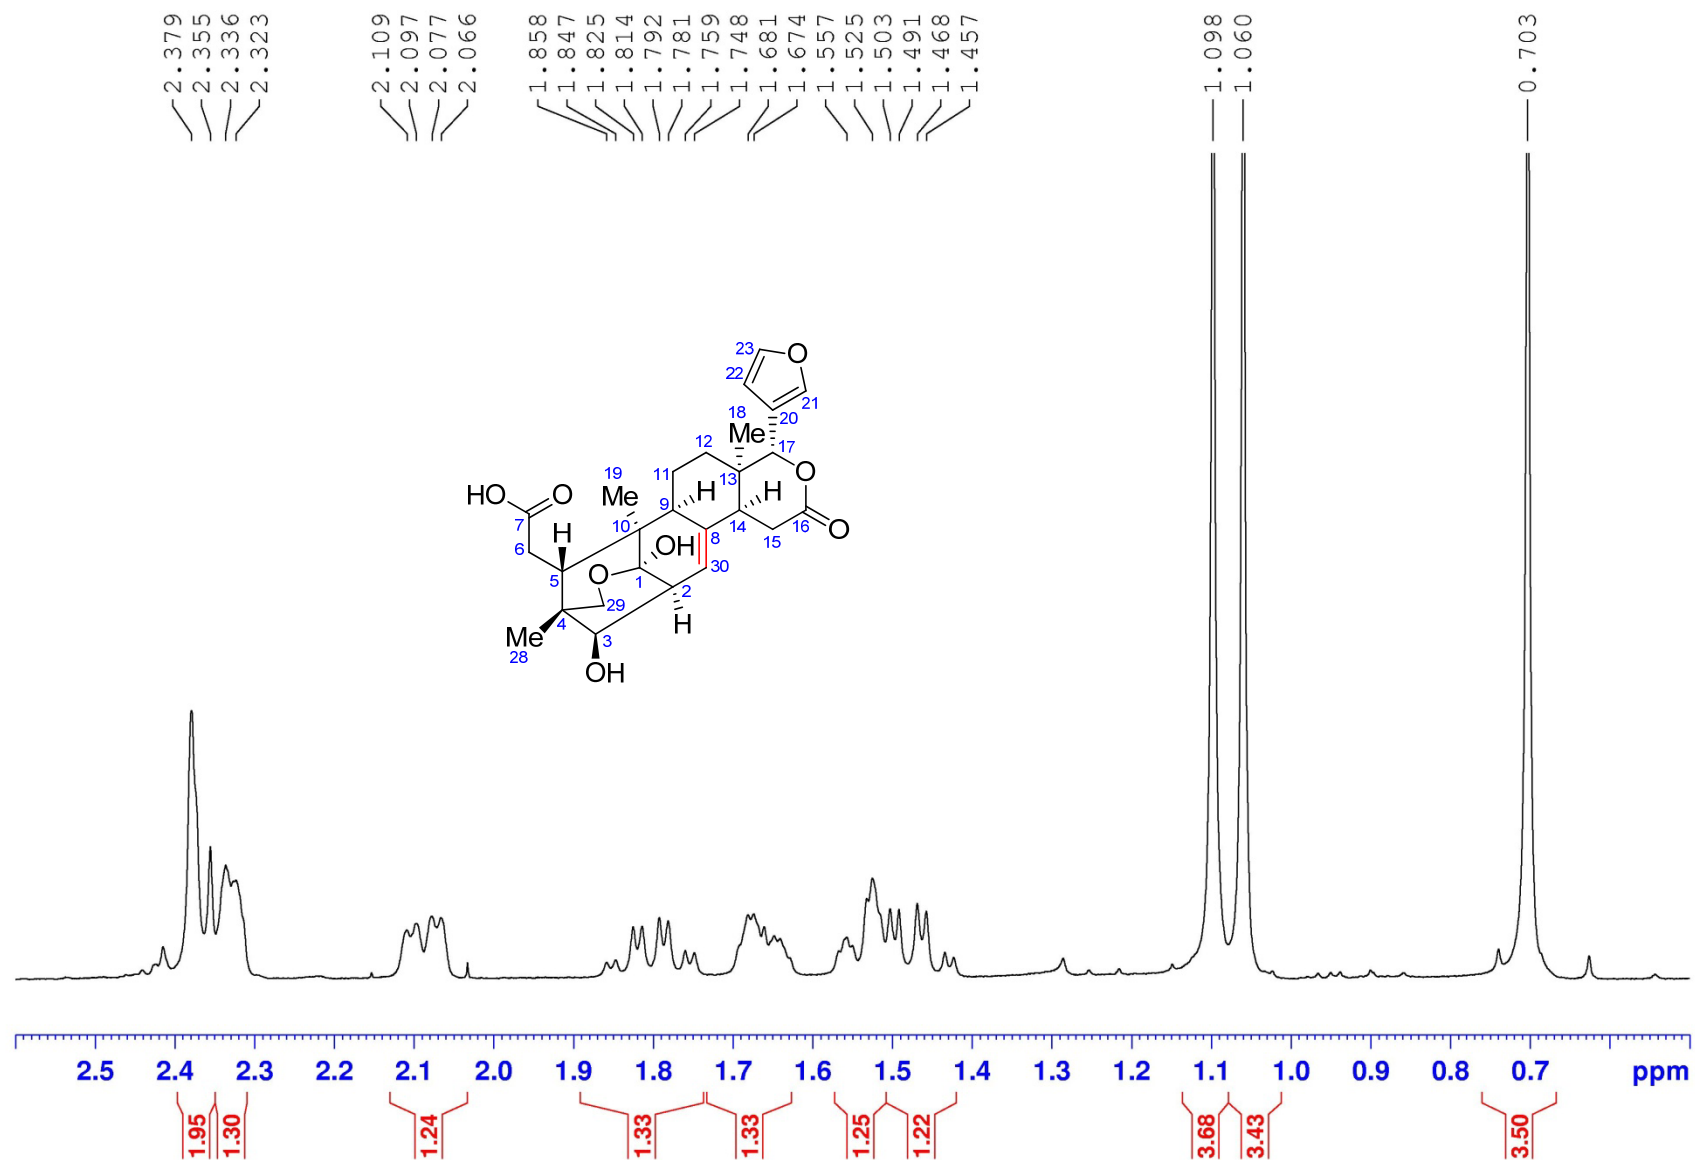



$^{13}\text{C}$  NMR (100 MHz) spectrum of **7** in  $\text{CD}_3\text{OD}$

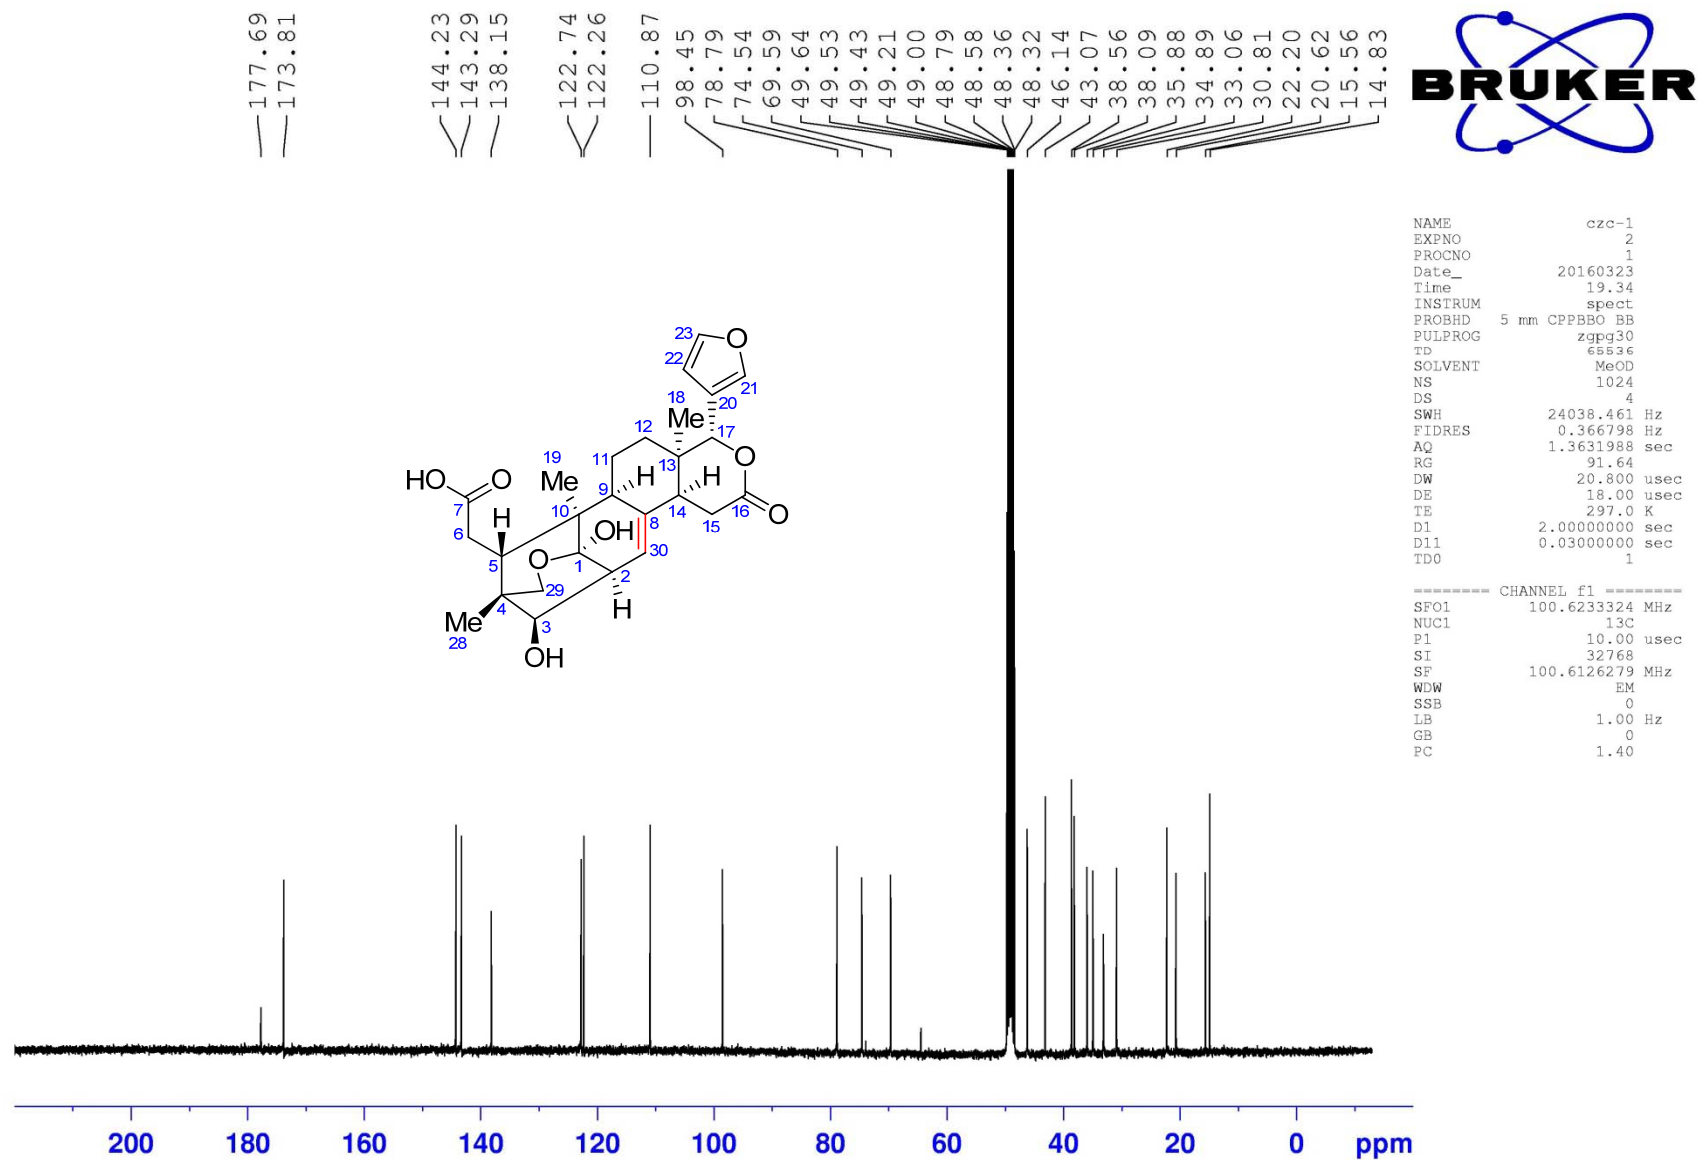

$^{13}\text{C}$  NMR (100 MHz) spectrum of **7** in  $\text{CD}_3\text{OD}$

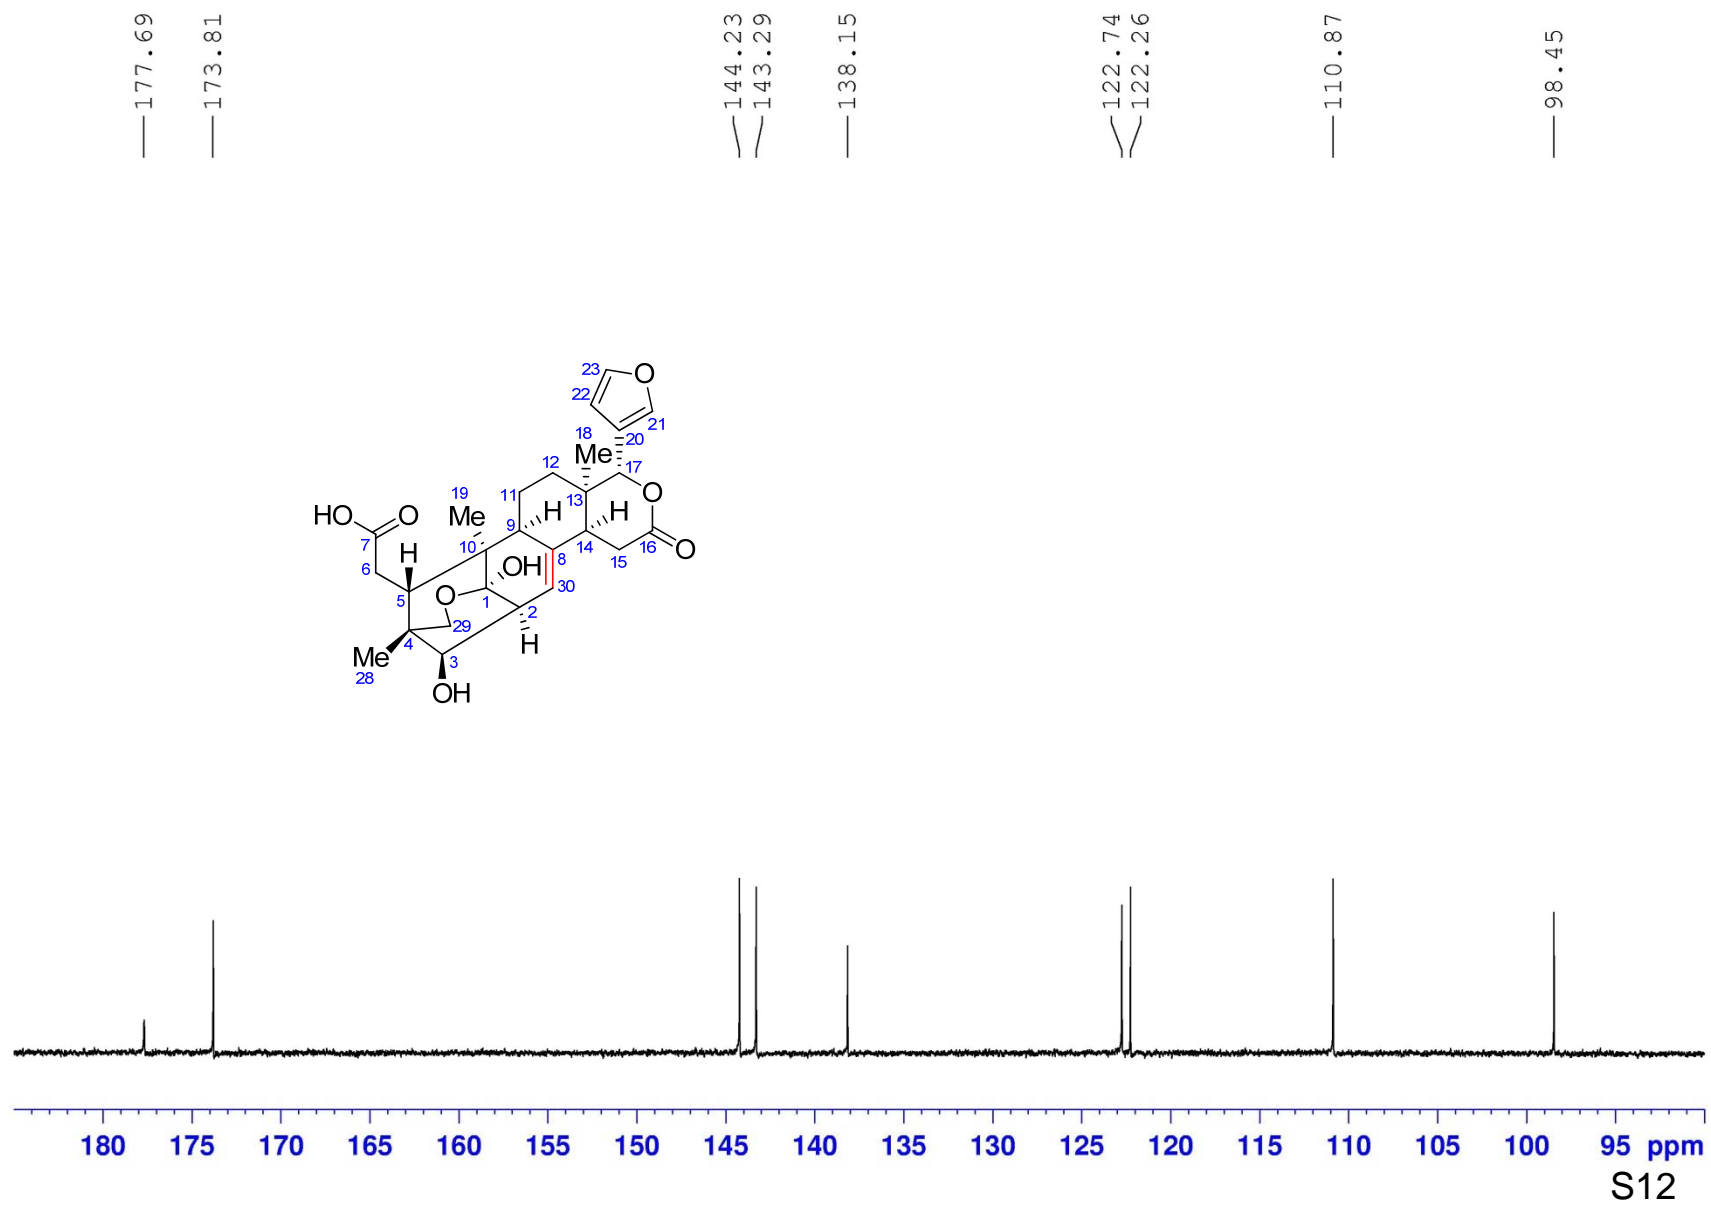

$^{13}\text{C}$  NMR (100 MHz) spectrum of **7** in  $\text{CD}_3\text{OD}$

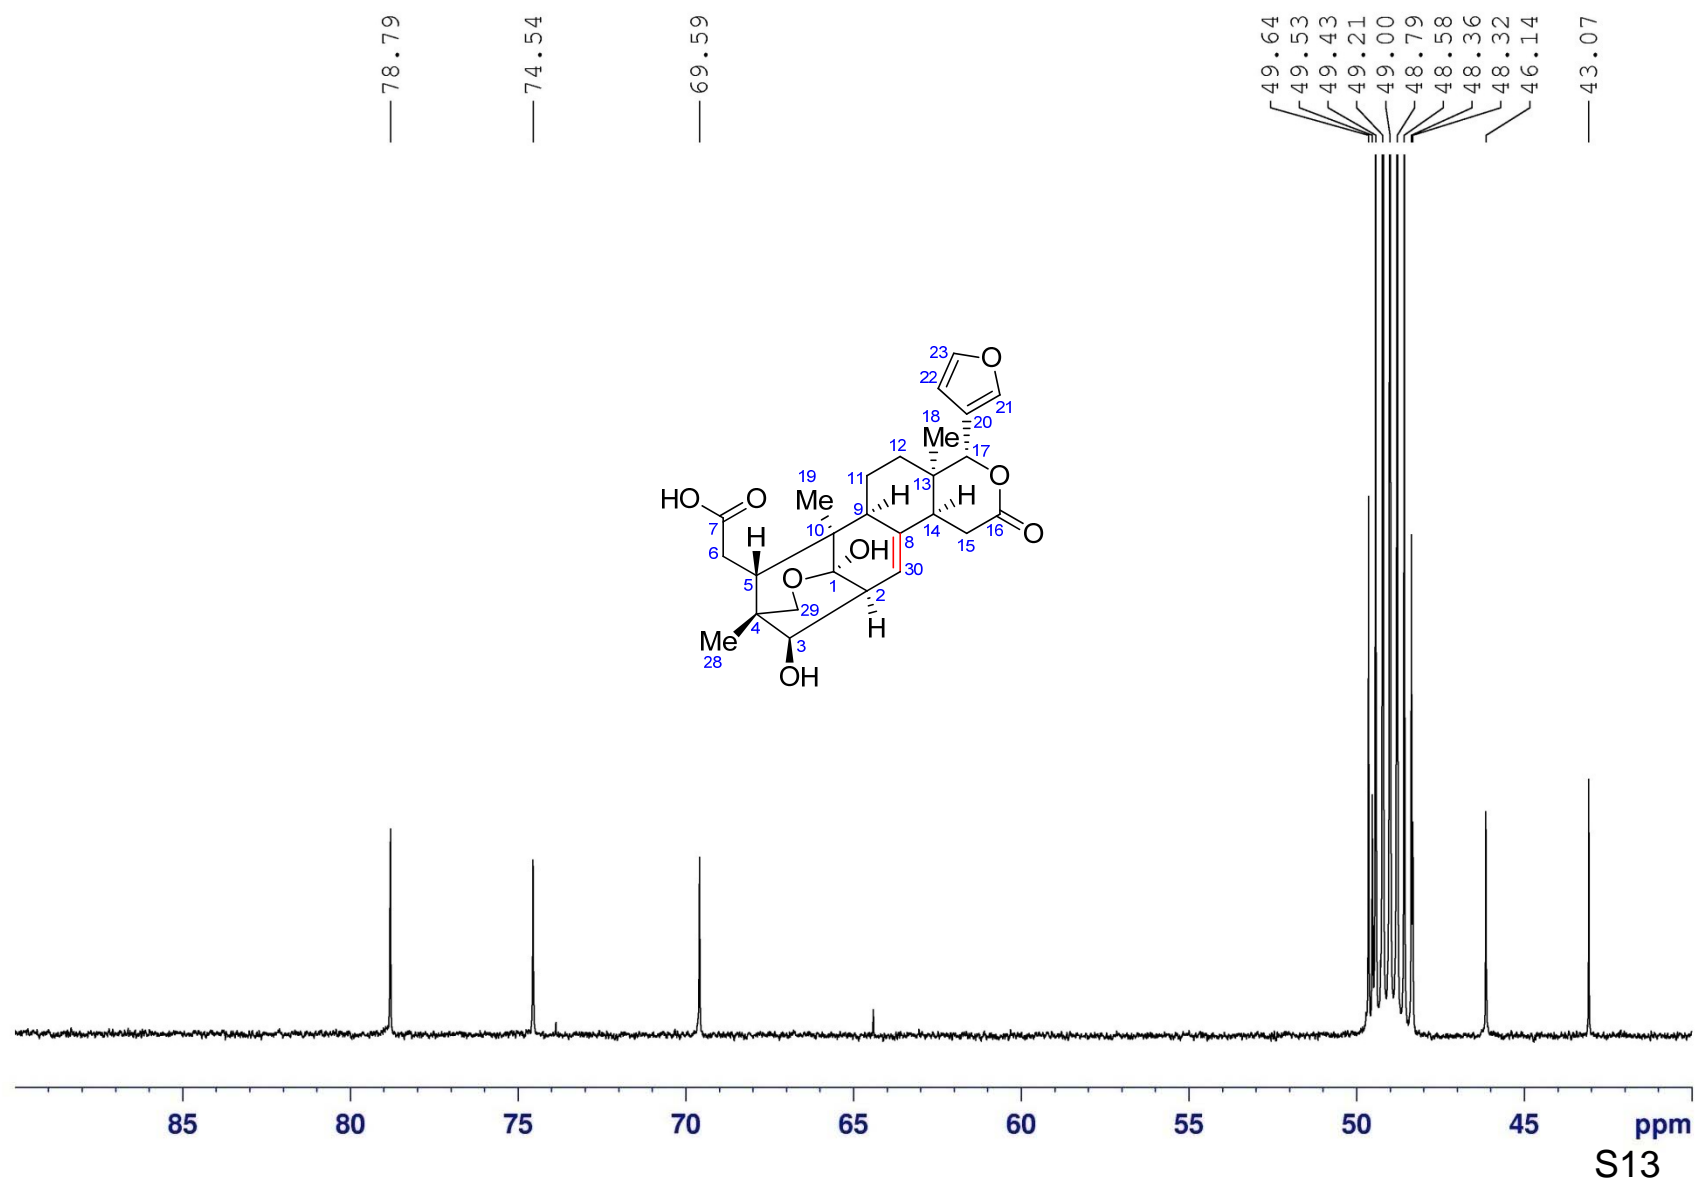

$^{13}\text{C}$  NMR (100 MHz) spectrum of **7** in  $\text{CD}_3\text{OD}$

— 38.56  
— 38.09

— 35.88

— 34.89

— 33.06

— 30.81

— 22.20

— 20.62

— 15.56

— 14.83

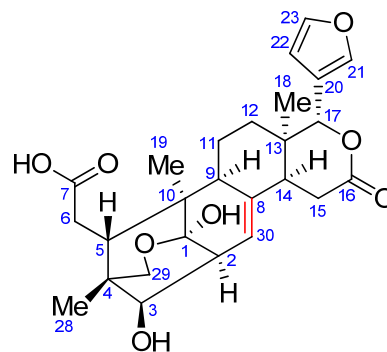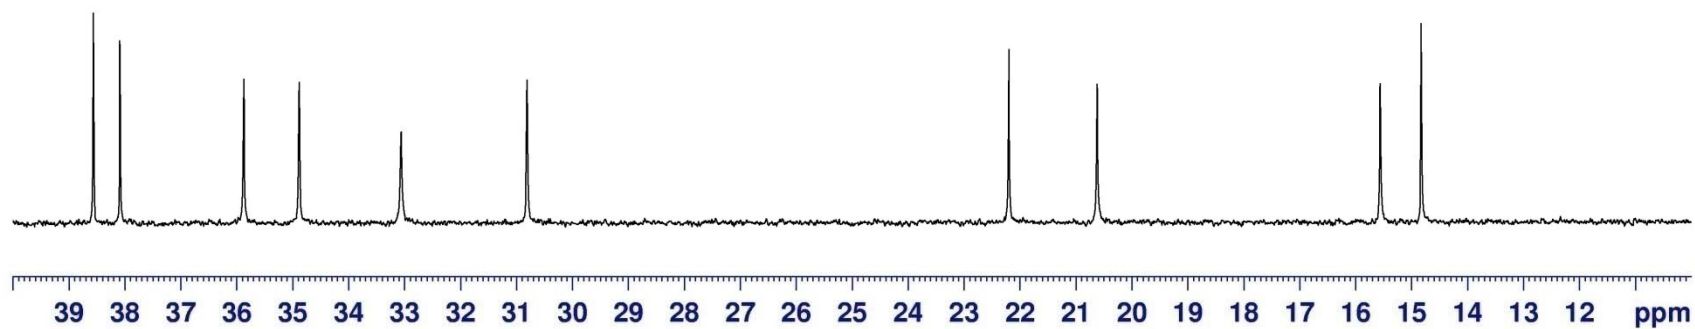

# DEPT 135 spectrum of **7** in CD<sub>3</sub>OD

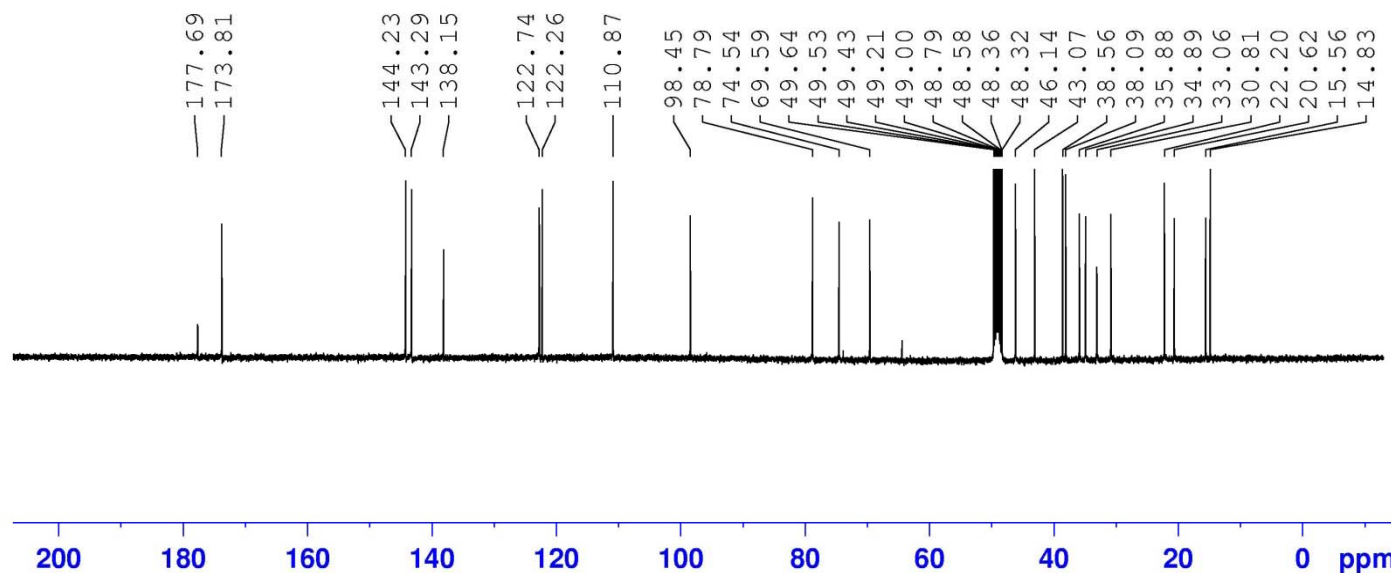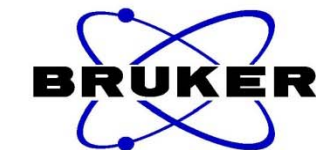

```

NAME          czc-1
EXPNO         3
PROCNO        1
Date_         20160323
Time          19.52
INSTRUM       spect
PROBHD        5 mm CPMBO BB
PULPROG       deptspl35
TD            65536
SOLVENT       MeOD
NS            300
DS            4
SWH           24038.461 Hz
FIDRES        0.366798 Hz
AQ            1.3631988 sec
RG            130.26
DW            20.800 usec
DE            18.00 usec
TE            297.0 K
CNST2         145.0000000
D1            2.00000000 sec
D2            0.00344828 sec
D12           0.00002000 sec
TD0           1
  
```

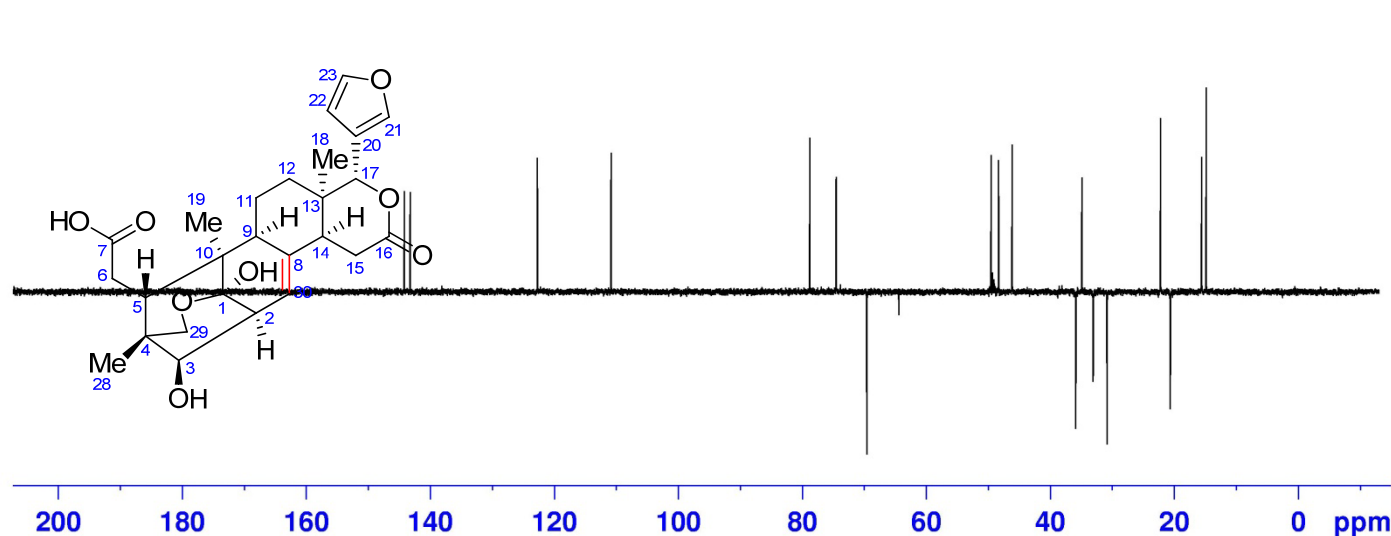

```

===== CHANNEL f1 =====
SF01         100.6233324 MHz
NUC1          13C
P1            10.00 usec
P13           2000.00 usec
SI            32768
SF            100.6126286 MHz
WDW           EM
SSB           0
LB            1.00 Hz
GB            0
PC            1.40
  
```

# DEPT 135 spectrum of **7** in CD<sub>3</sub>OD

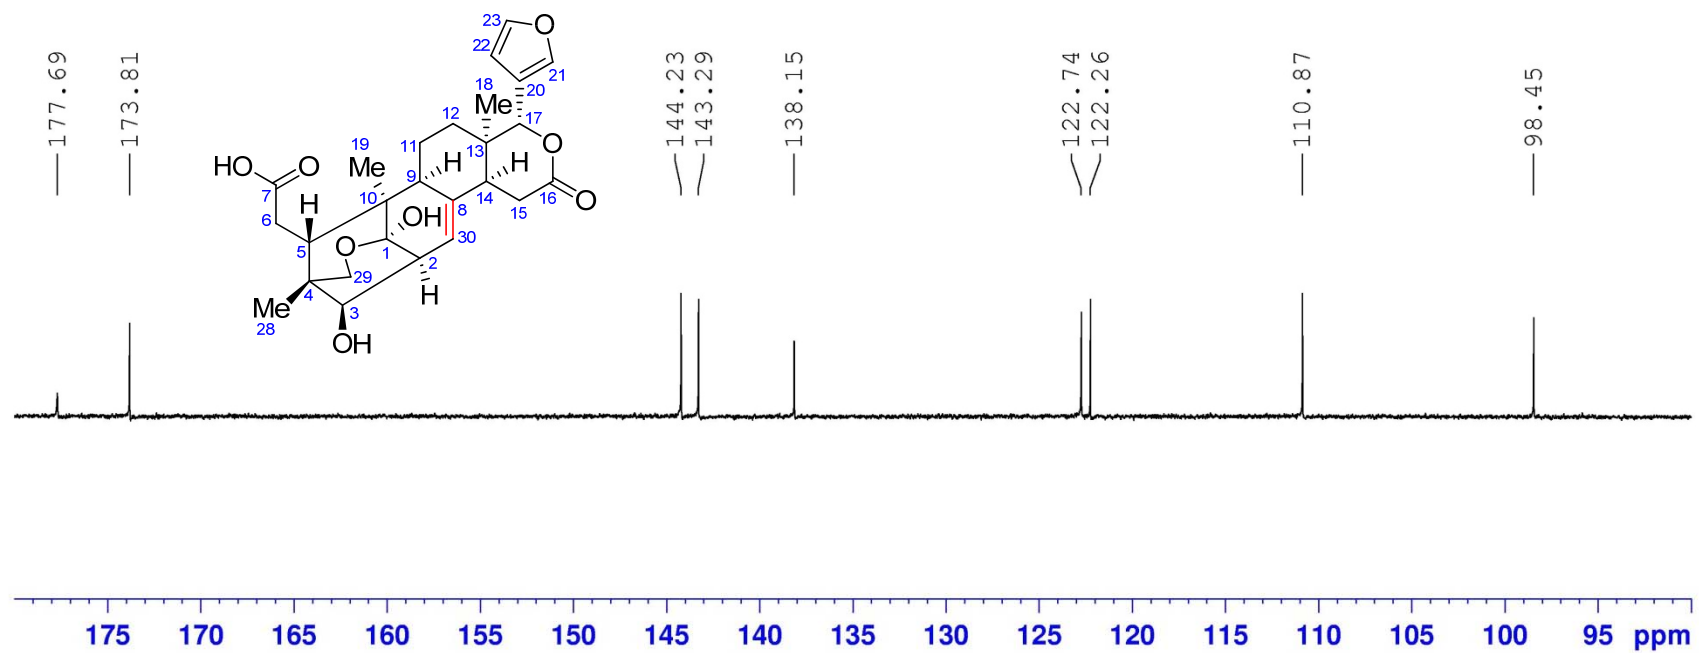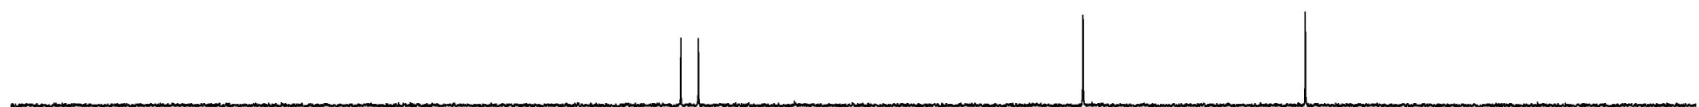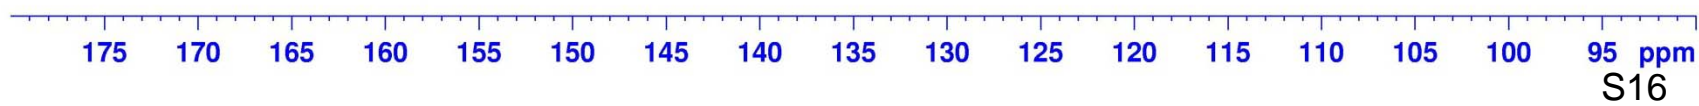

# DEPT 135 spectrum of **7** in CD<sub>3</sub>OD

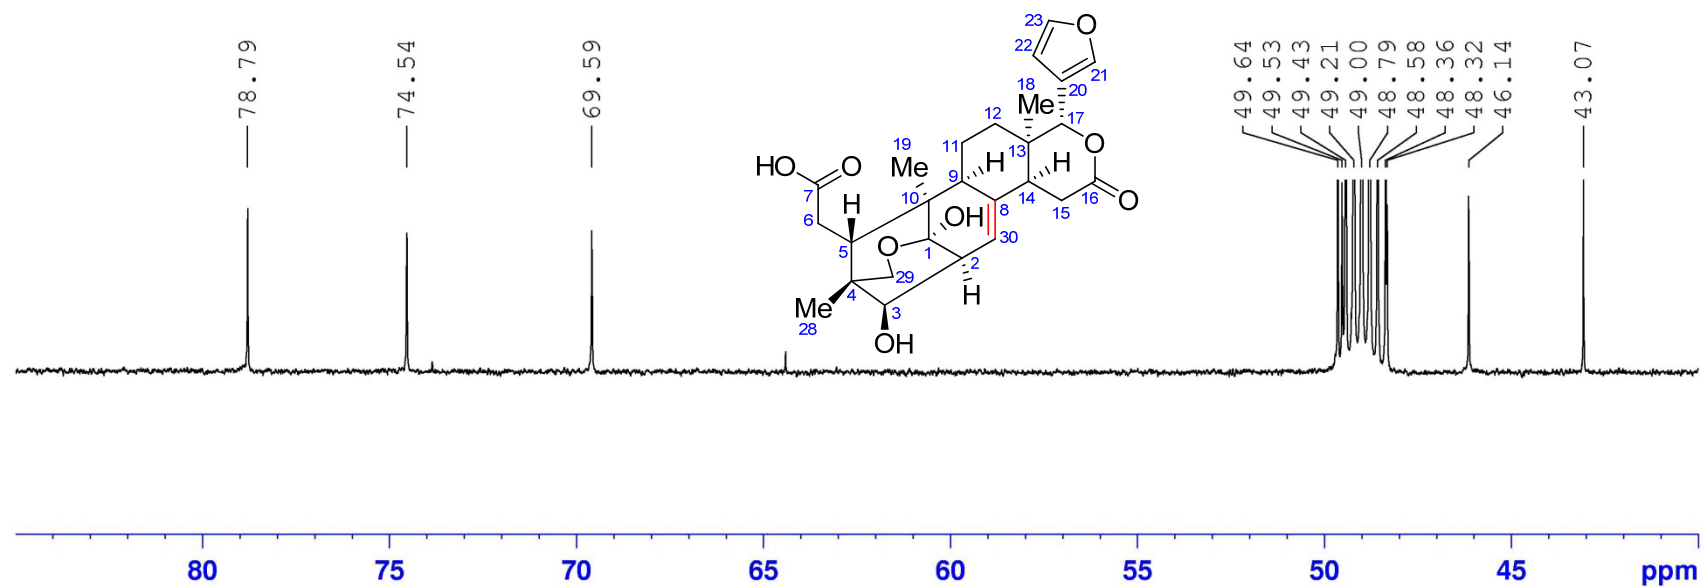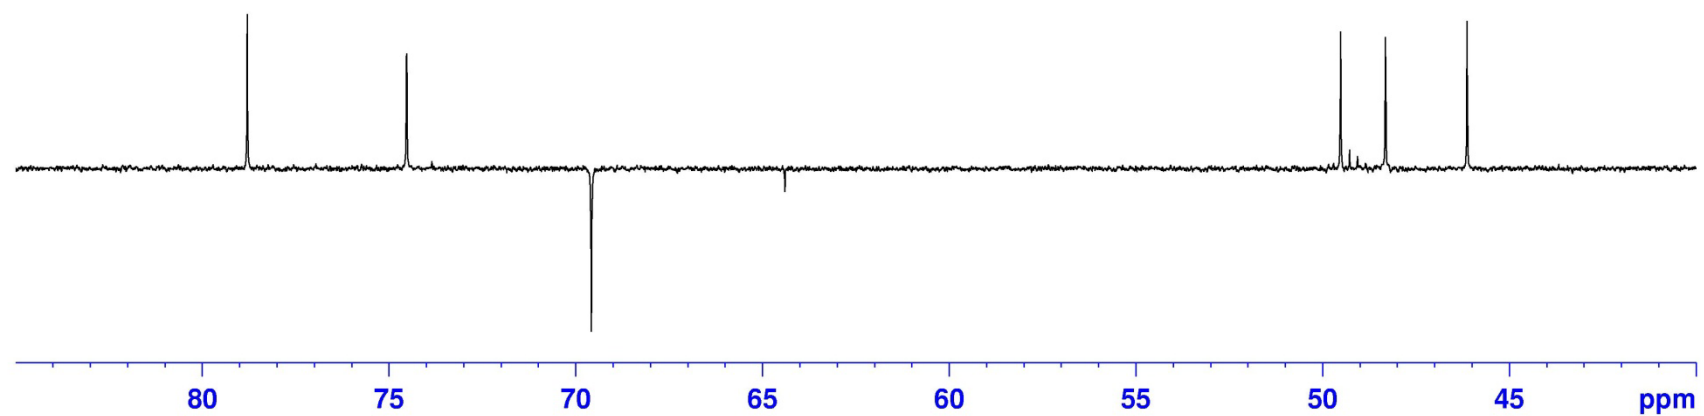

# DEPT 135 spectrum of **7** in CD<sub>3</sub>OD

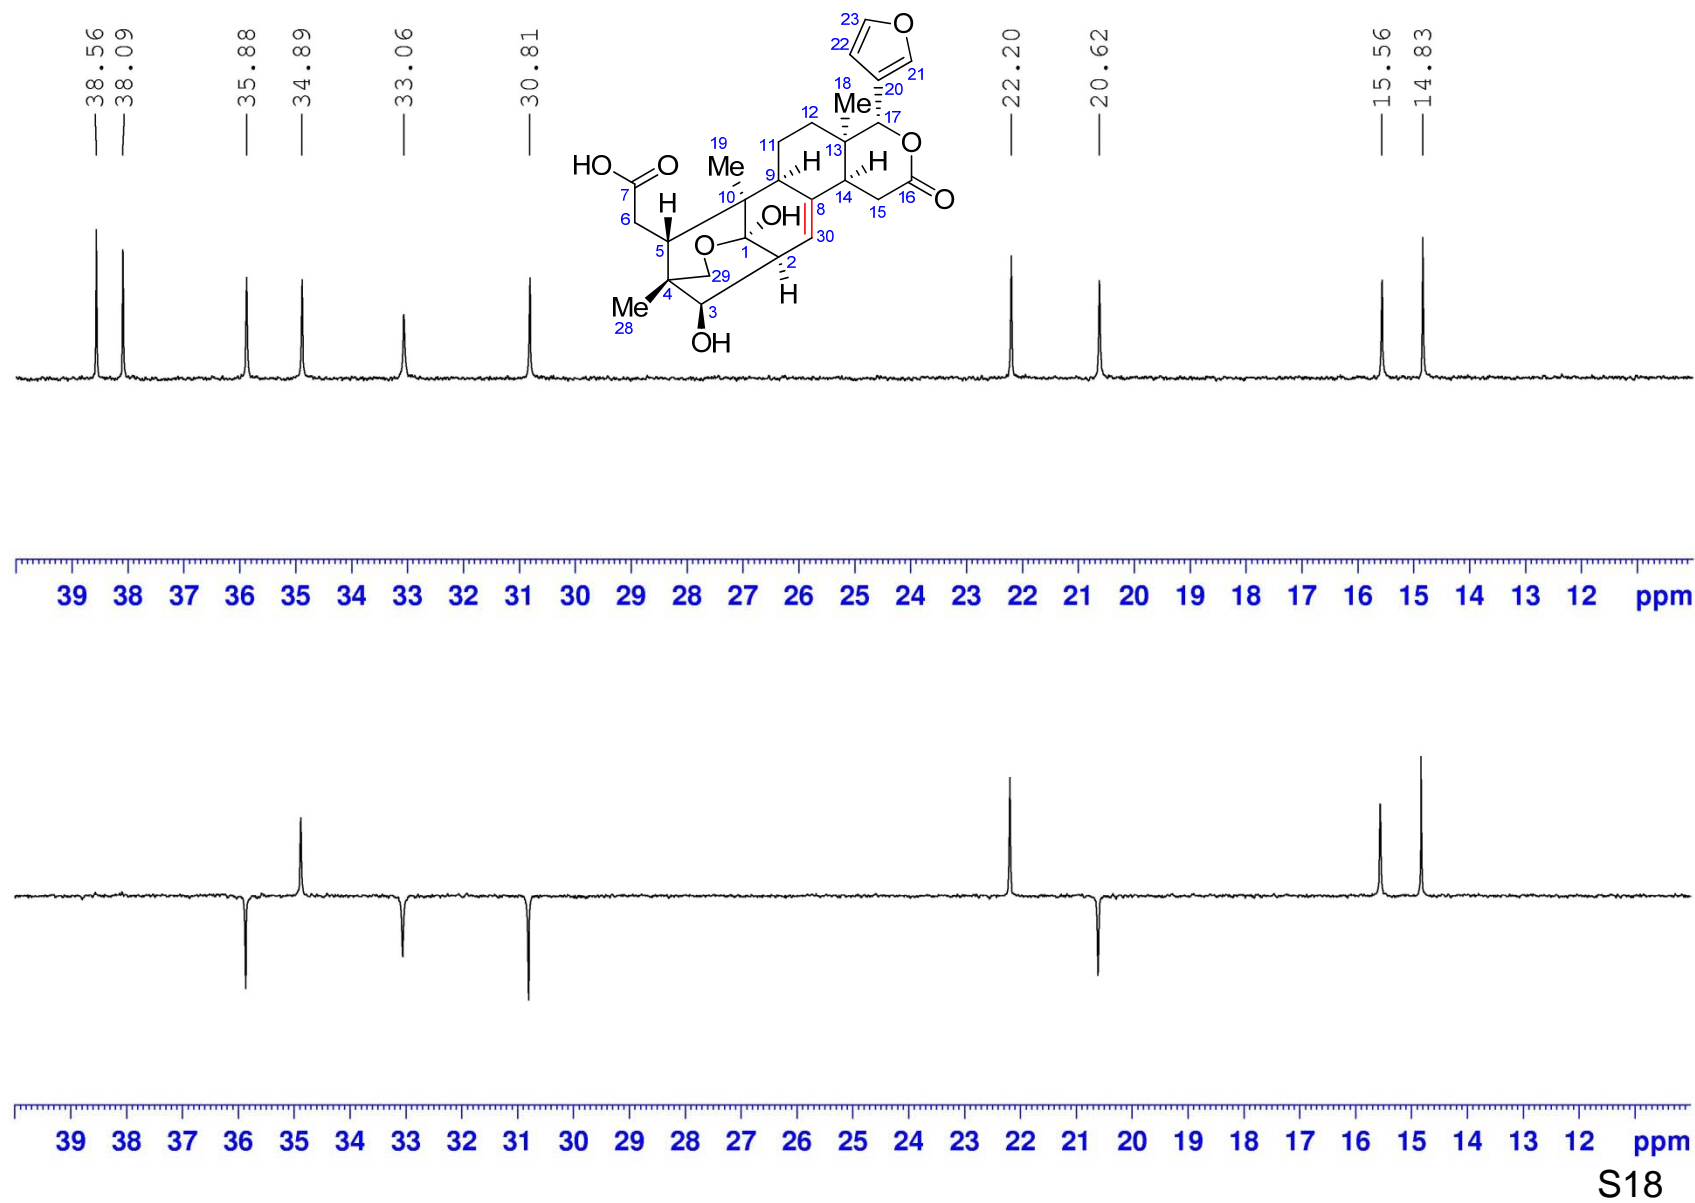



## LR-ESIMS for compound **8**

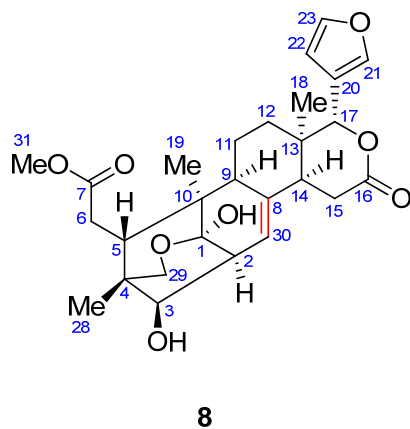

Chemical Formula:  $C_{27}H_{34}O_8$   
Exact Mass: 486.22537

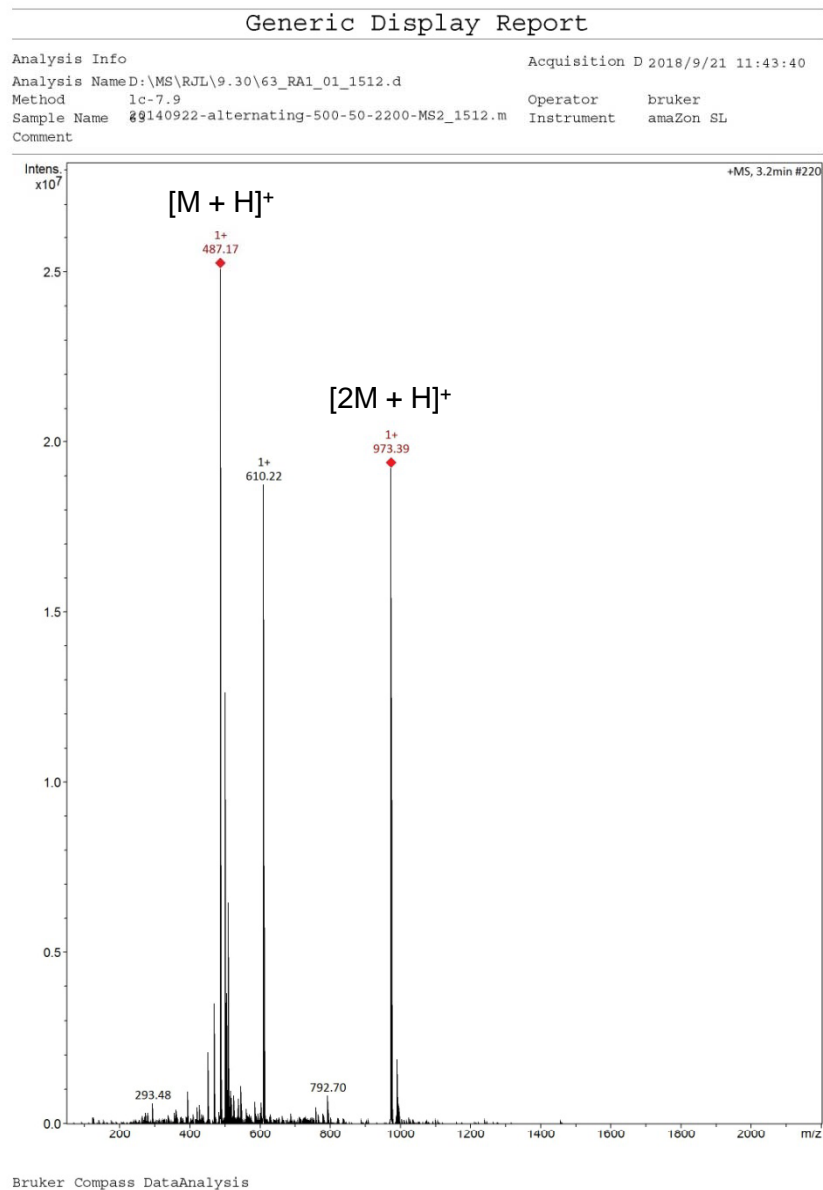

$^1\text{H}$  NMR (400 MHz) spectrum of **8** in  $\text{CDCl}_3$

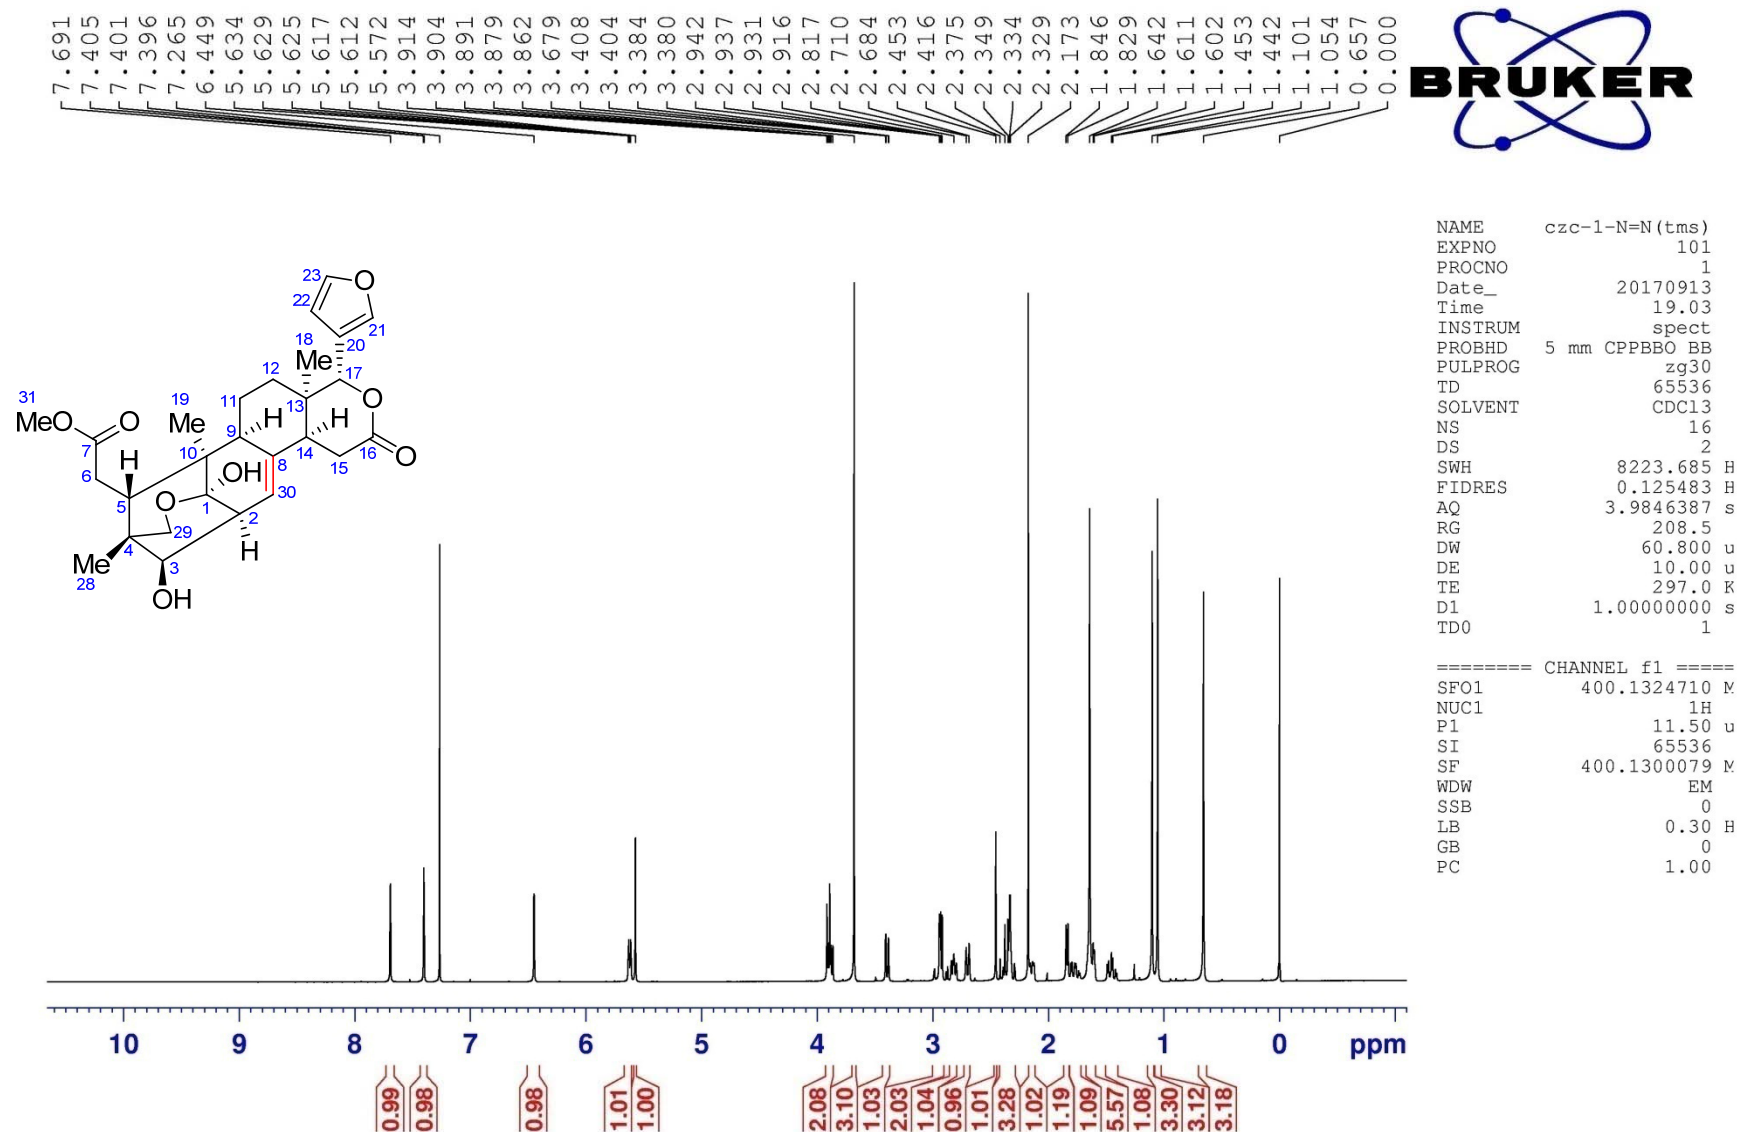

$^1\text{H}$  NMR (400 MHz) spectrum of **8** in  $\text{CDCl}_3$

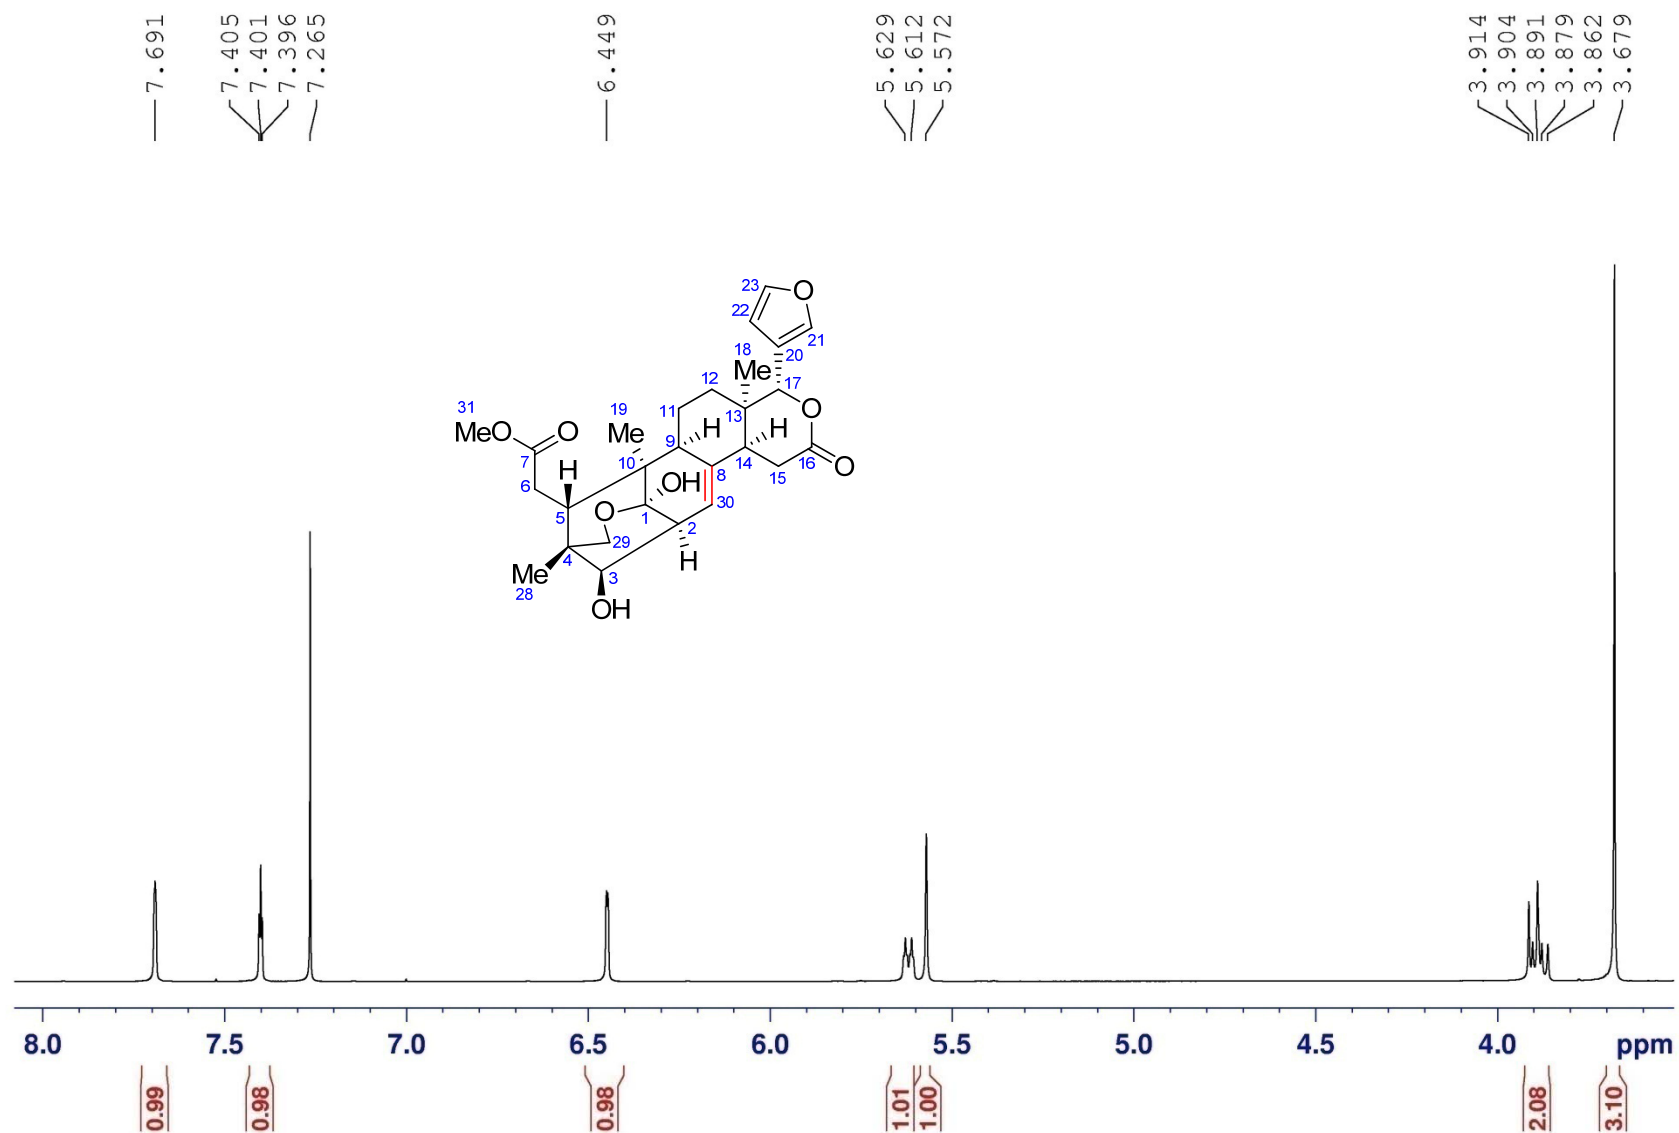

$^1\text{H}$  NMR (400 MHz) spectrum of **8** in  $\text{CDCl}_3$

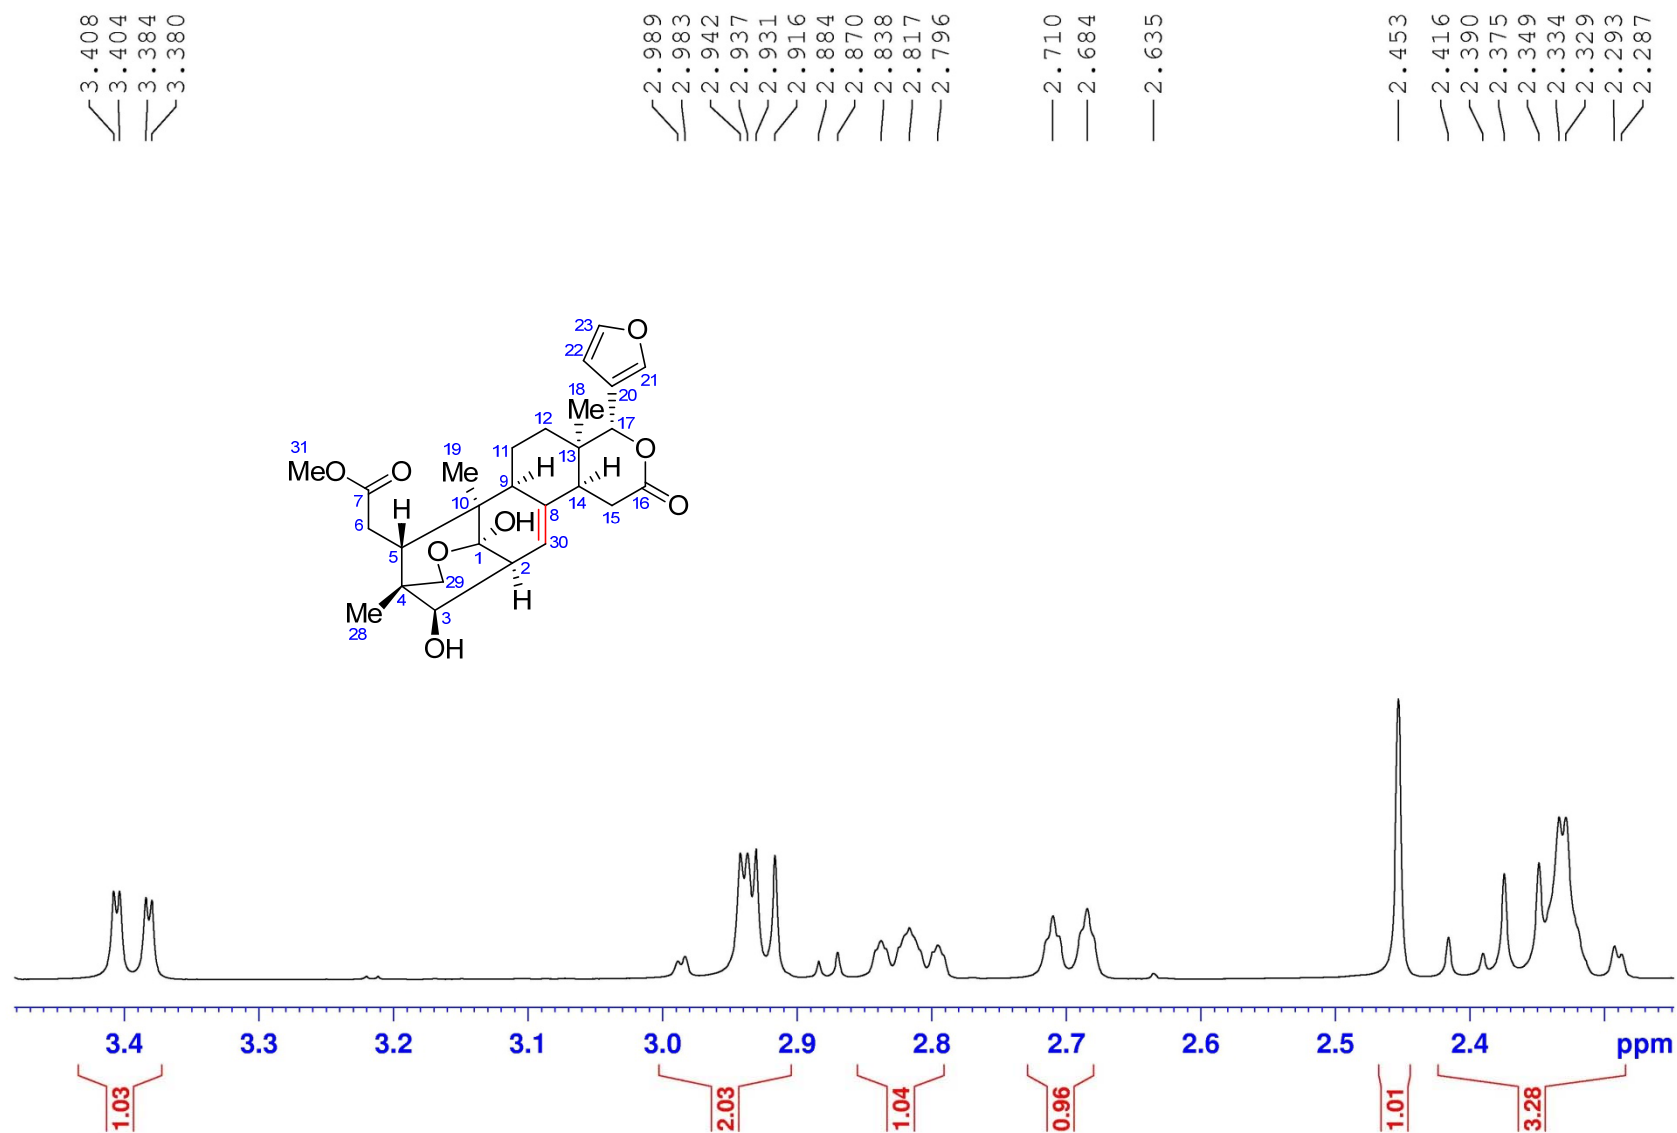

$^1\text{H}$  NMR (400 MHz) spectrum of **8** in  $\text{CDCl}_3$

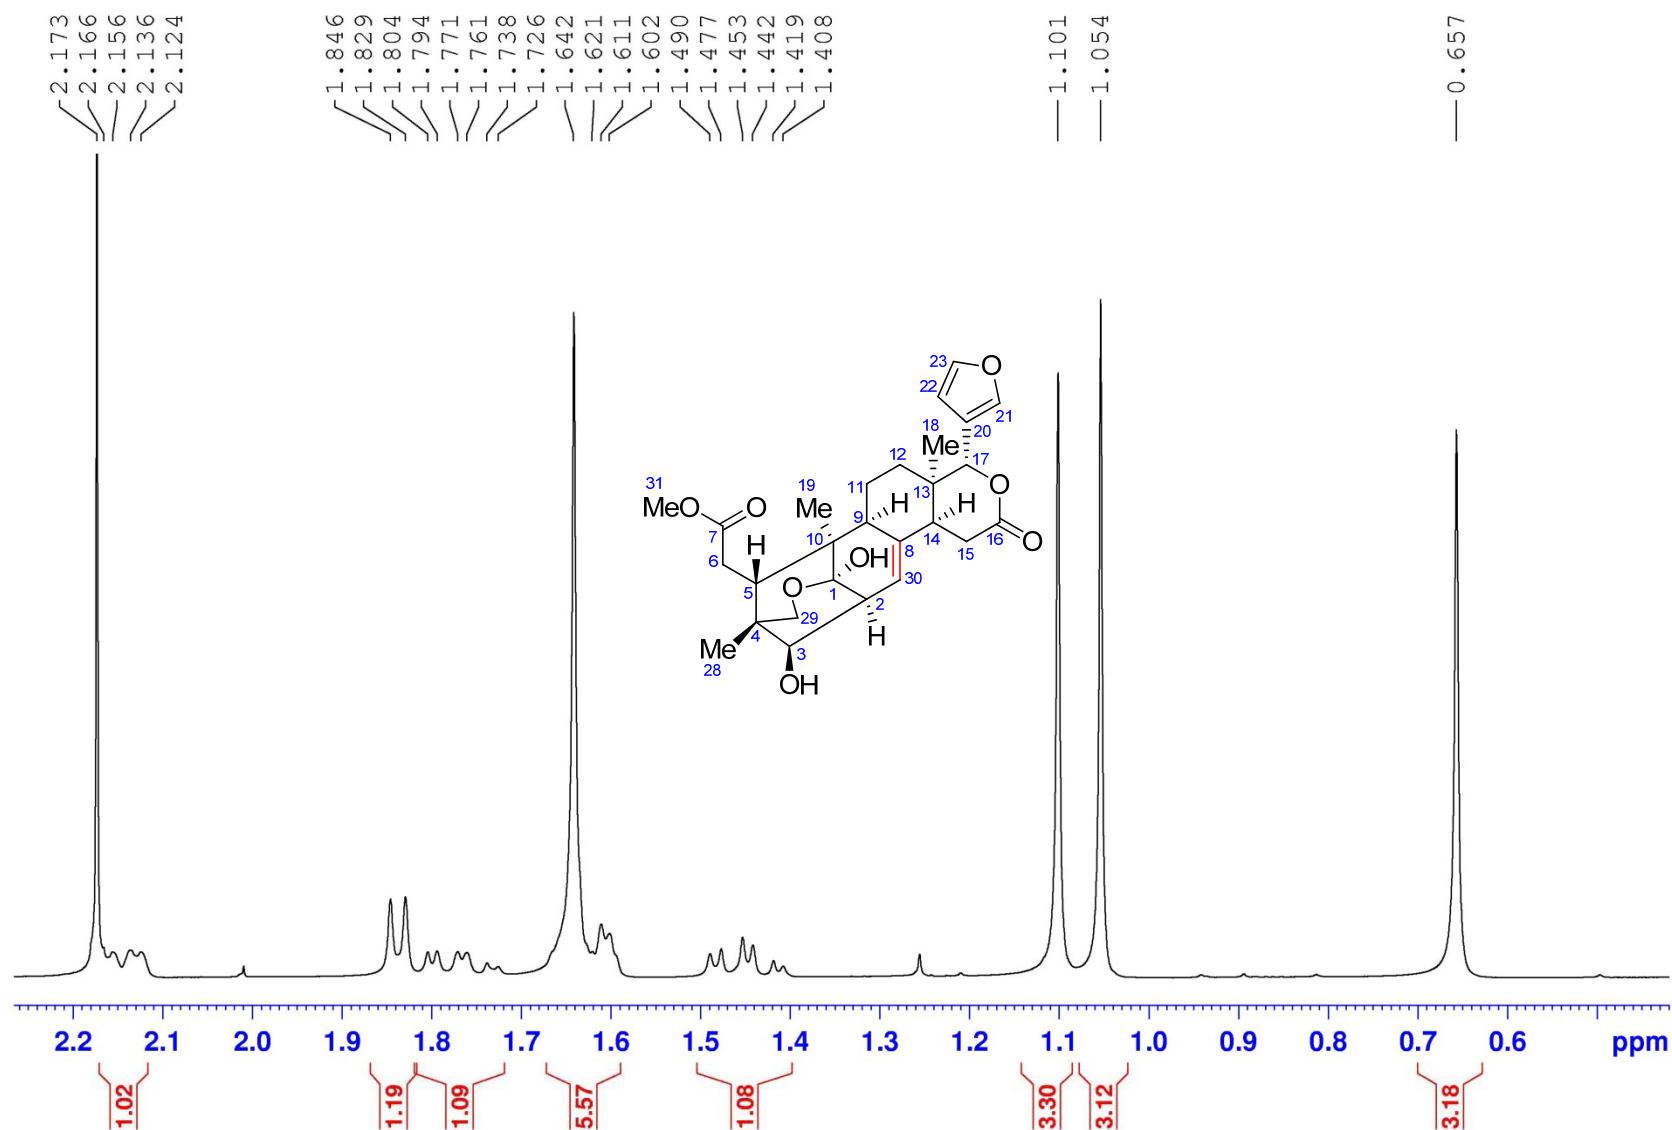

$^{13}\text{C}$  NMR (100 MHz) spectrum of **8** in  $\text{CDCl}_3$

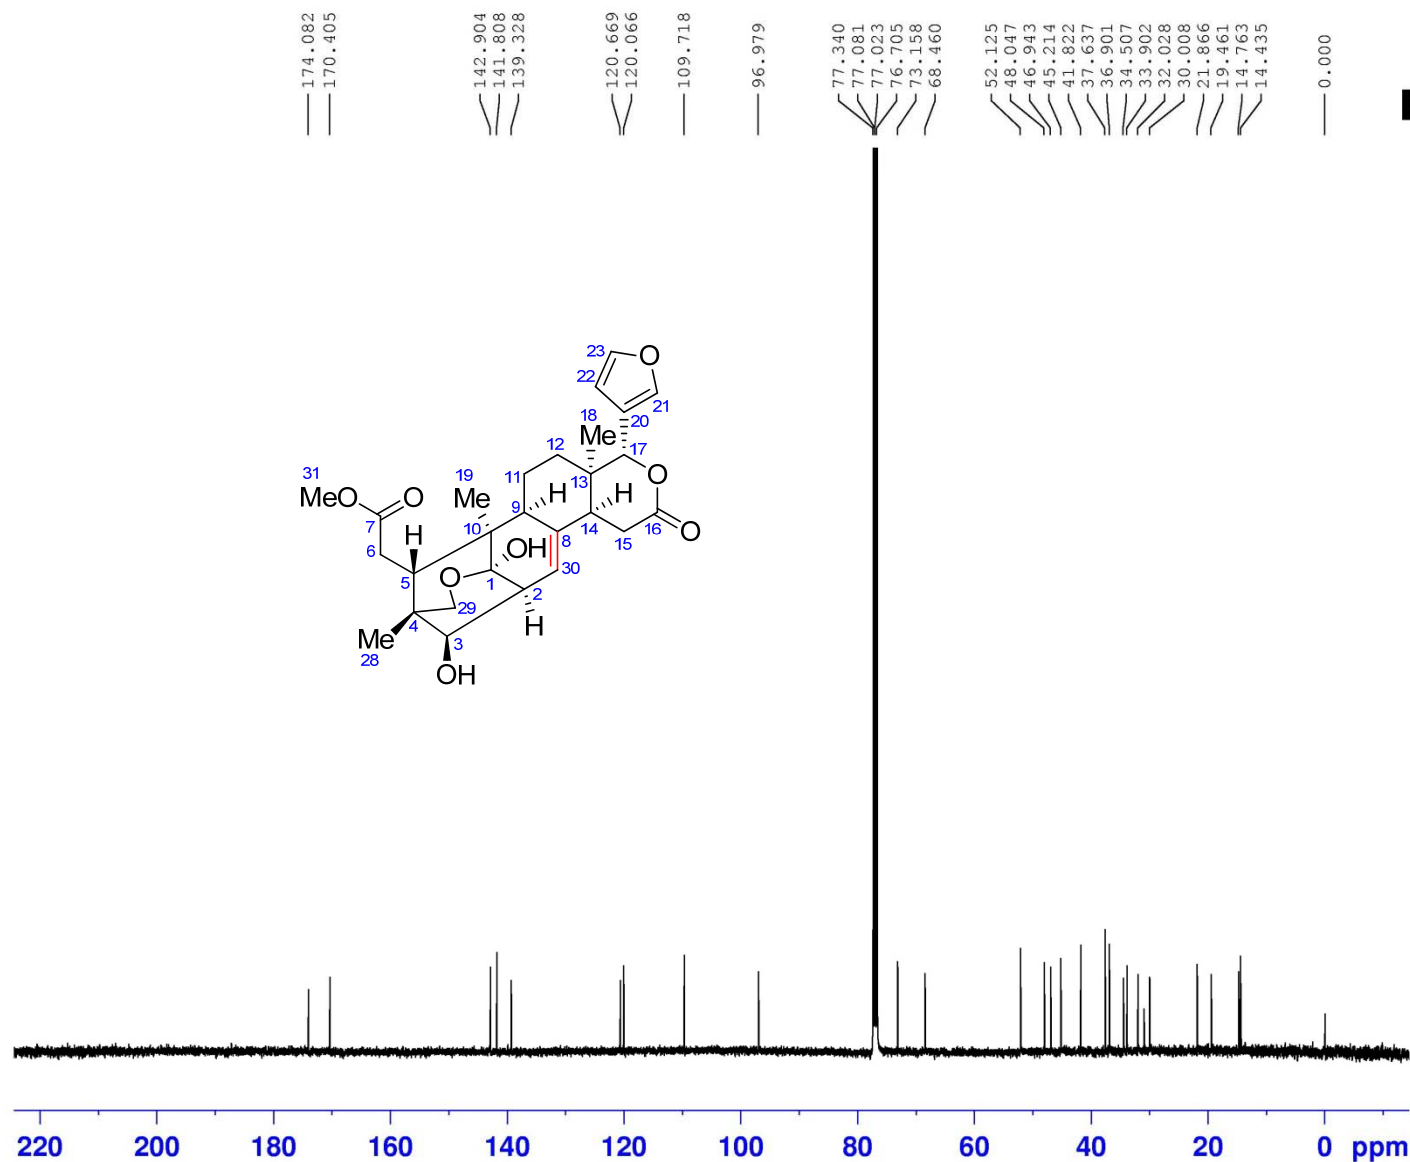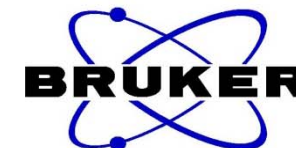

NAME czc-1-N=N(tms)  
 EXPNO 2  
 PROCNO 1  
 Date\_ 20170905  
 Time 20.18  
 INSTRUM spect  
 PROBHD 5 mm CPPBBO BB  
 PULPROG zgpg30  
 TD 65536  
 SOLVENT  $\text{CDCl}_3$   
 NS 1024  
 DS 4  
 SWH 24038.461 F  
 FIDRES 0.366798 F  
 AQ 1.3631988 s  
 RG 85.34  
 DW 20.800 u  
 DE 18.00 u  
 TE 297.0 K  
 D1 2.00000000 s  
 D11 0.03000000 s  
 TD0 1

===== CHANNEL f1 =====  
 SFO1 100.6233324 M  
 NUC1 13C  
 P1 10.00 u  
 SI 32768  
 SF 100.6127690 M  
 WDW EM  
 SSB 0  
 LB 1.00 F  
 GB 0  
 PC 1.40

$^{13}\text{C}$  NMR (100 MHz) spectrum of **8** in  $\text{CDCl}_3$

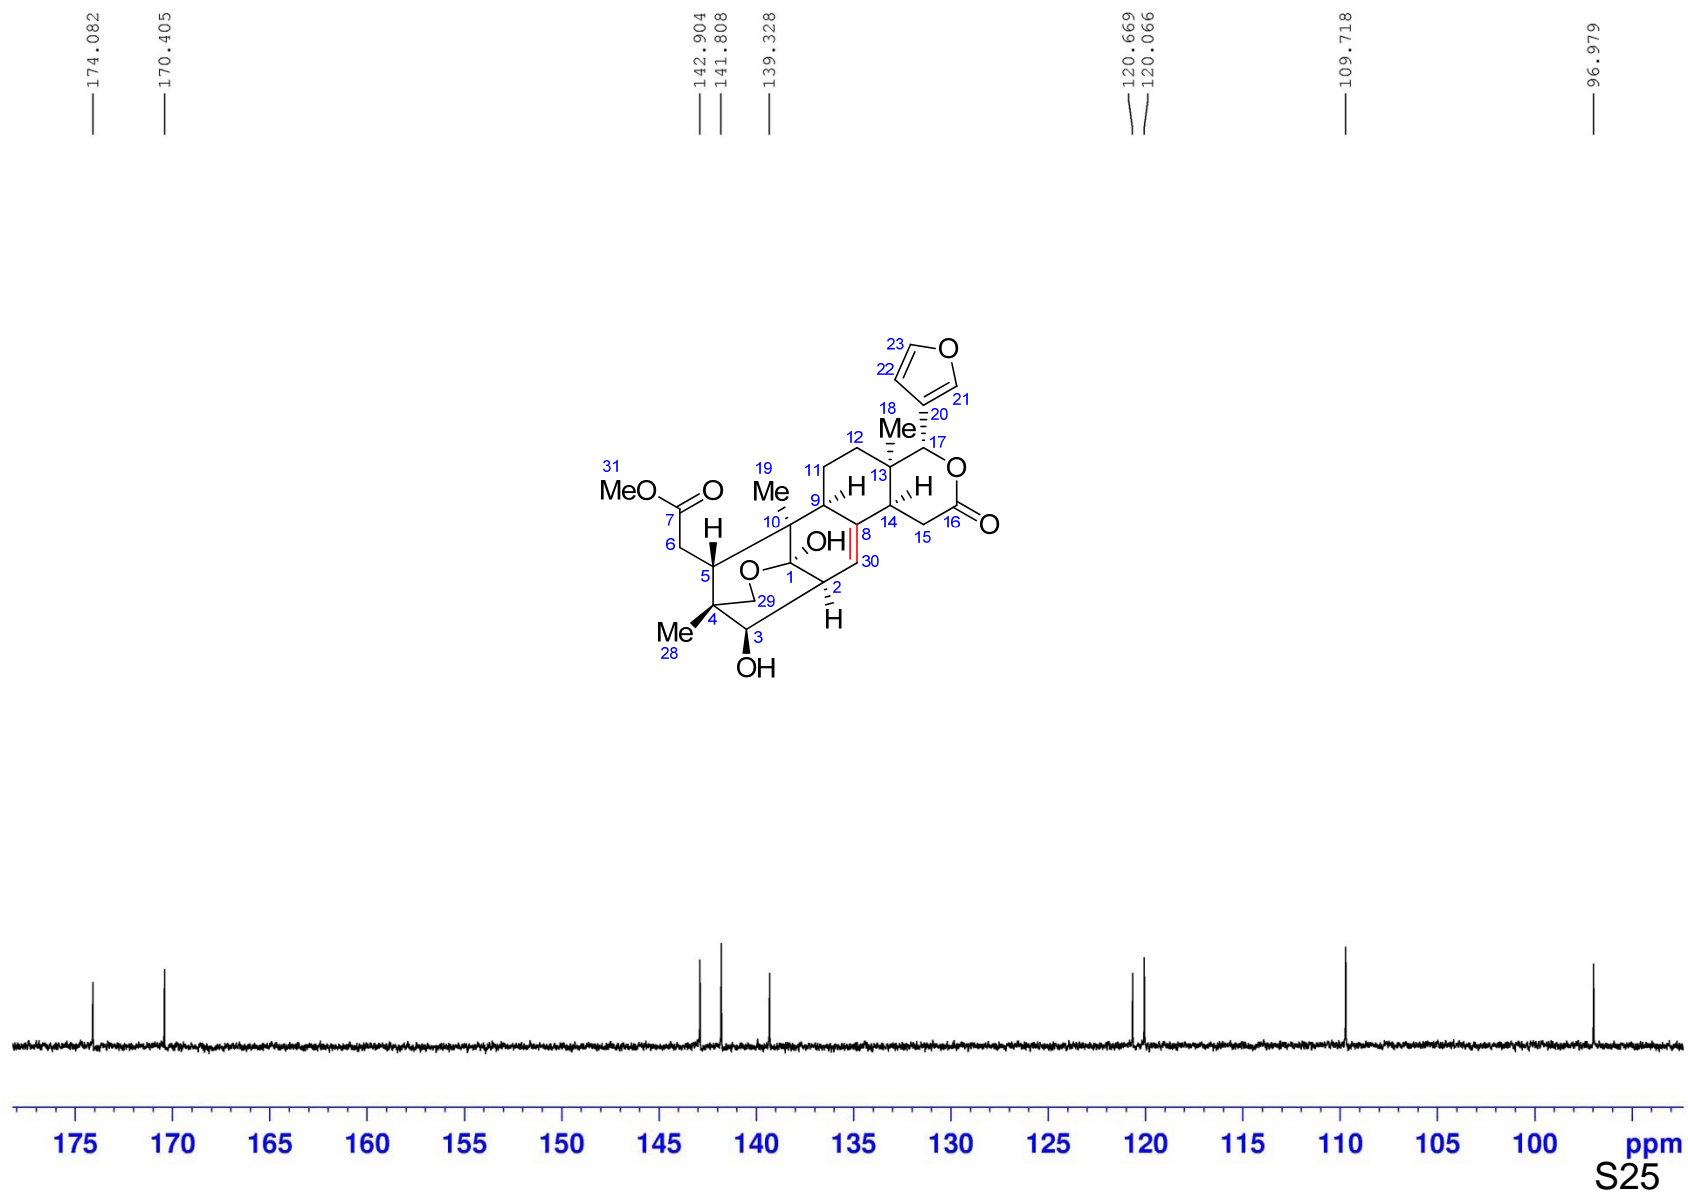

$^{13}\text{C}$  NMR (100 MHz) spectrum of **8** in  $\text{CDCl}_3$

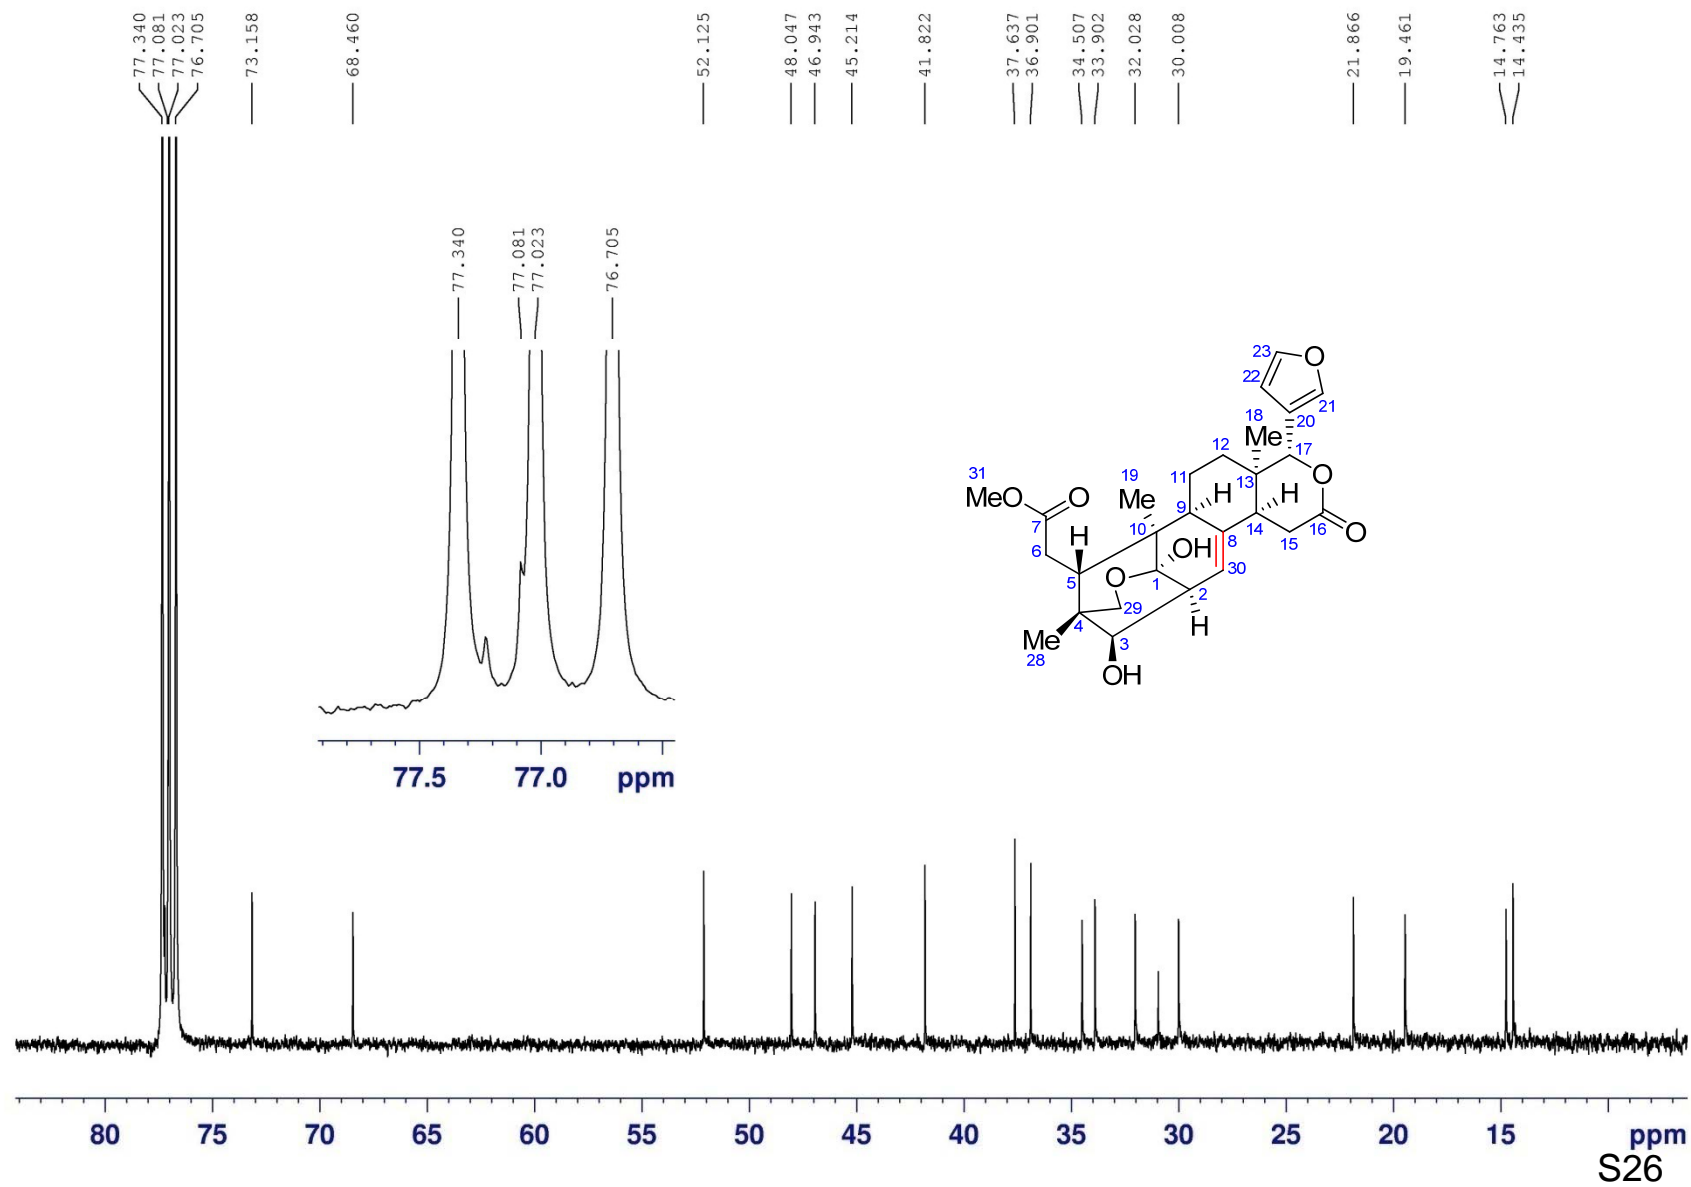



# DEPT 135 spectrum of **8** in CDCl<sub>3</sub>

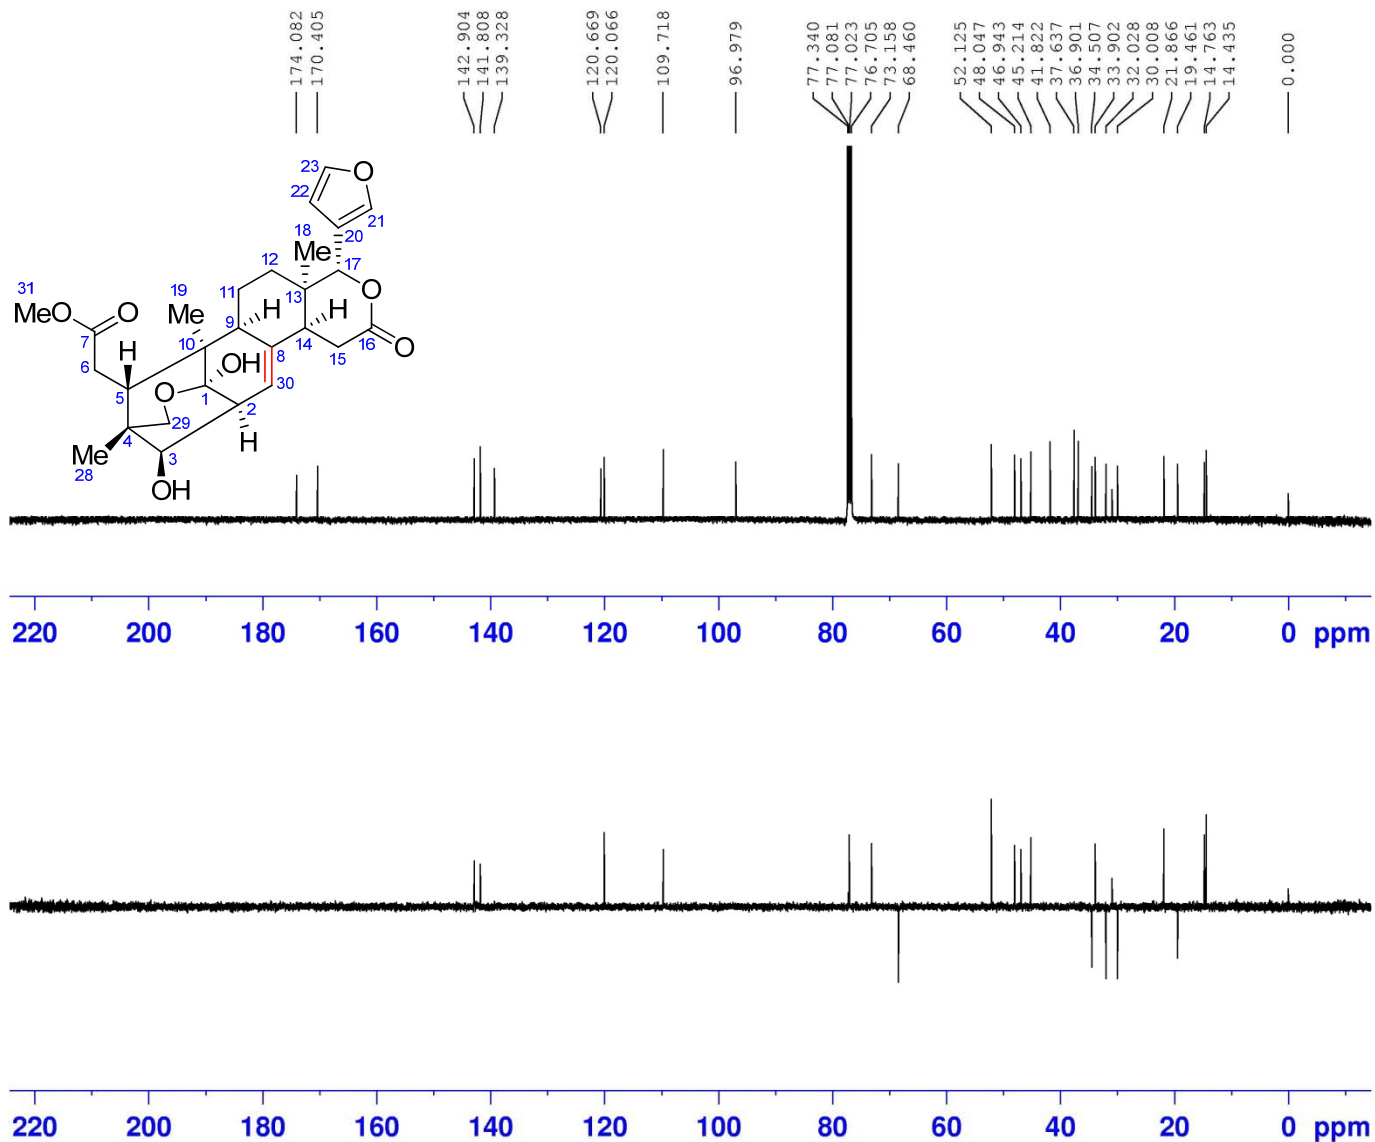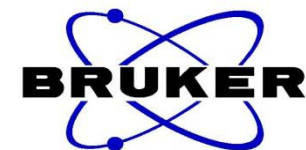

```

NAME      czc-1-N=N(tms)
EXPNO      3
PROCNO     1
Date_      20170905
Time       21.25
INSTRUM    spect
PROBHD     5 mm CFPBBO BB
PULPROG    deptsp135
TD         65536
SOLVENT    CDCl3
NS         300
DS         4
SWH        24038.461 F
FIDRES     0.366798 F
AQ         1.3631988 s
RG         130.26
DW         20.800 ns
DE         18.00 ns
TE         297.0 K
CNST2      145.0000000
D1         2.00000000 s
D2         0.00344828 s
D12        0.00002000 s
TD0        1
  
```

```

===== CHANNEL f1 =====
SFO1      100.6233324 MHz
NUC1      13C
P1        10.00 ns
P13       2000.00 ns
SI        32768
SF        100.6127691 MHz
WDW       EM
SSB       0
LB        1.00 MHz
GB        0
PC        1.40
  
```

# DEPT 135 spectrum of **8** in CDCl<sub>3</sub>

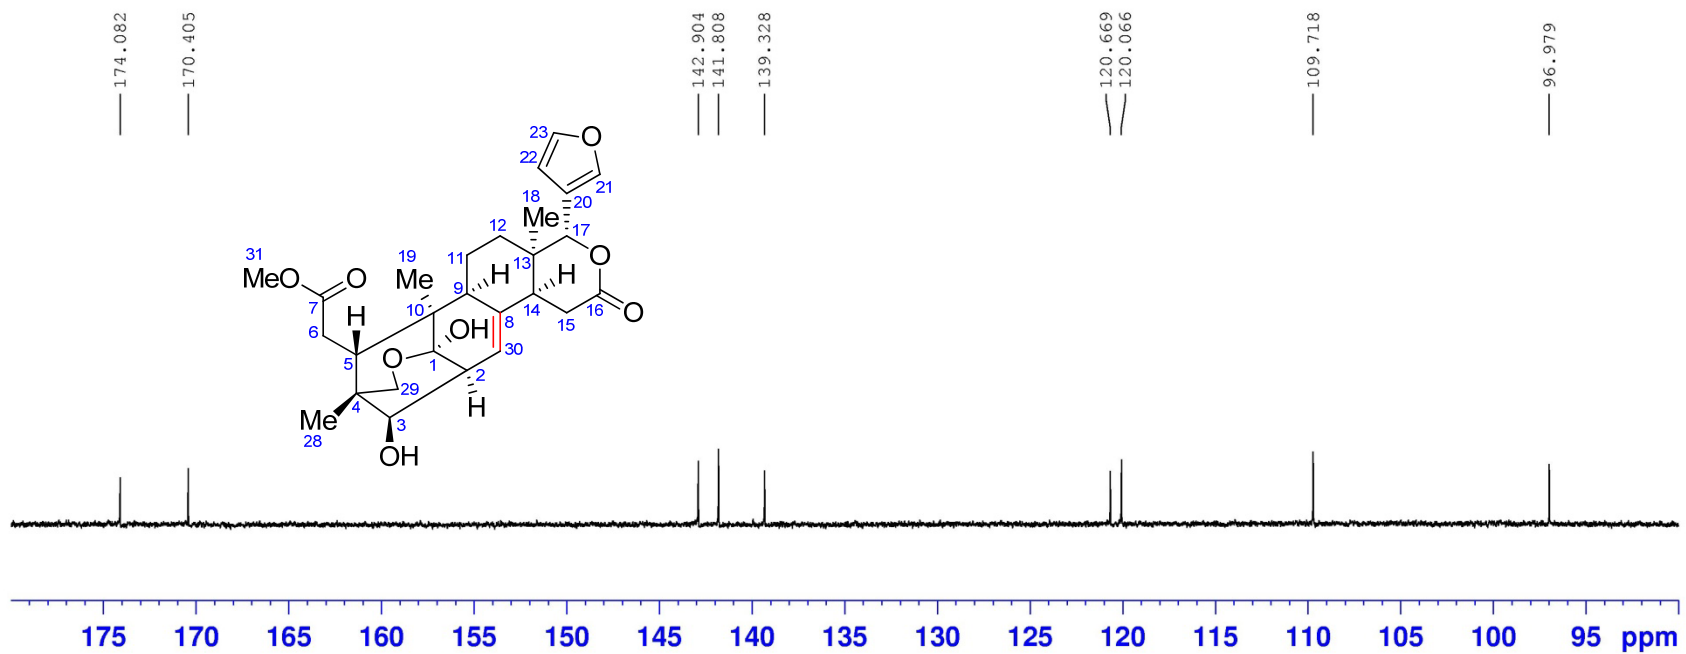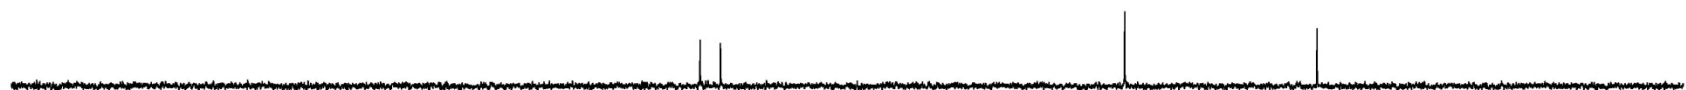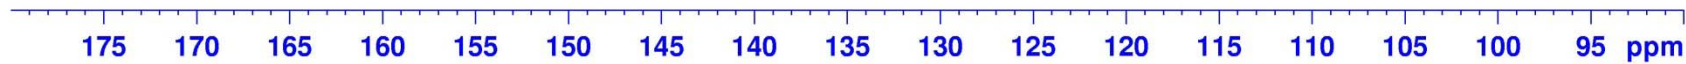

DEPT 135 spectrum of **8** in CDCl<sub>3</sub>

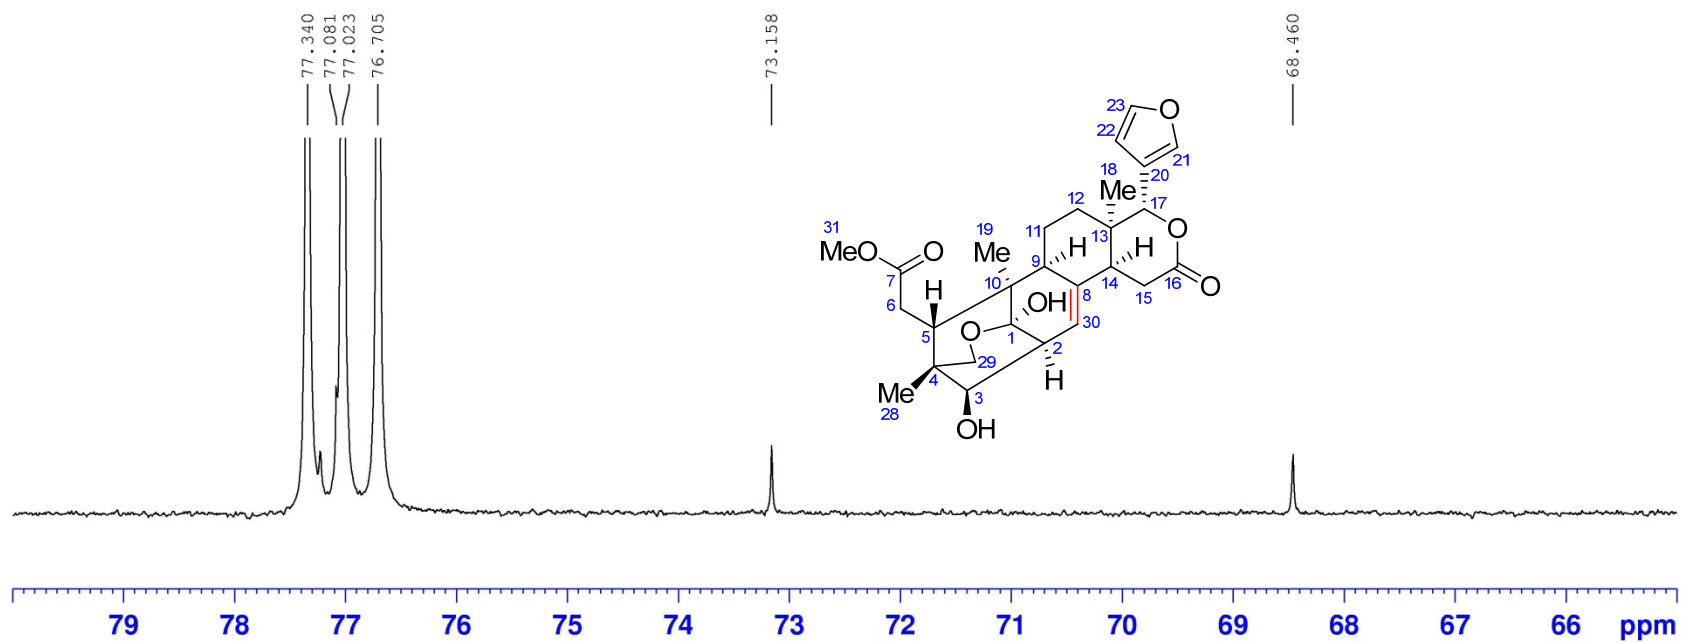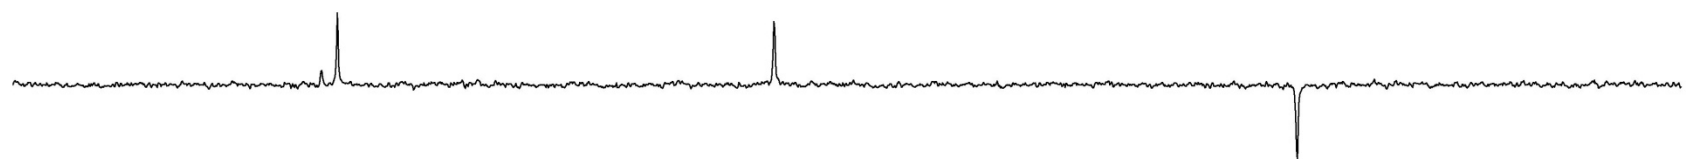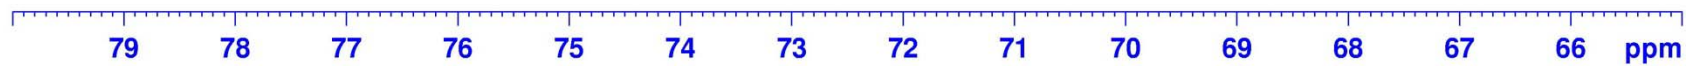

DEPT 135 spectrum of **8** in CDCl<sub>3</sub>

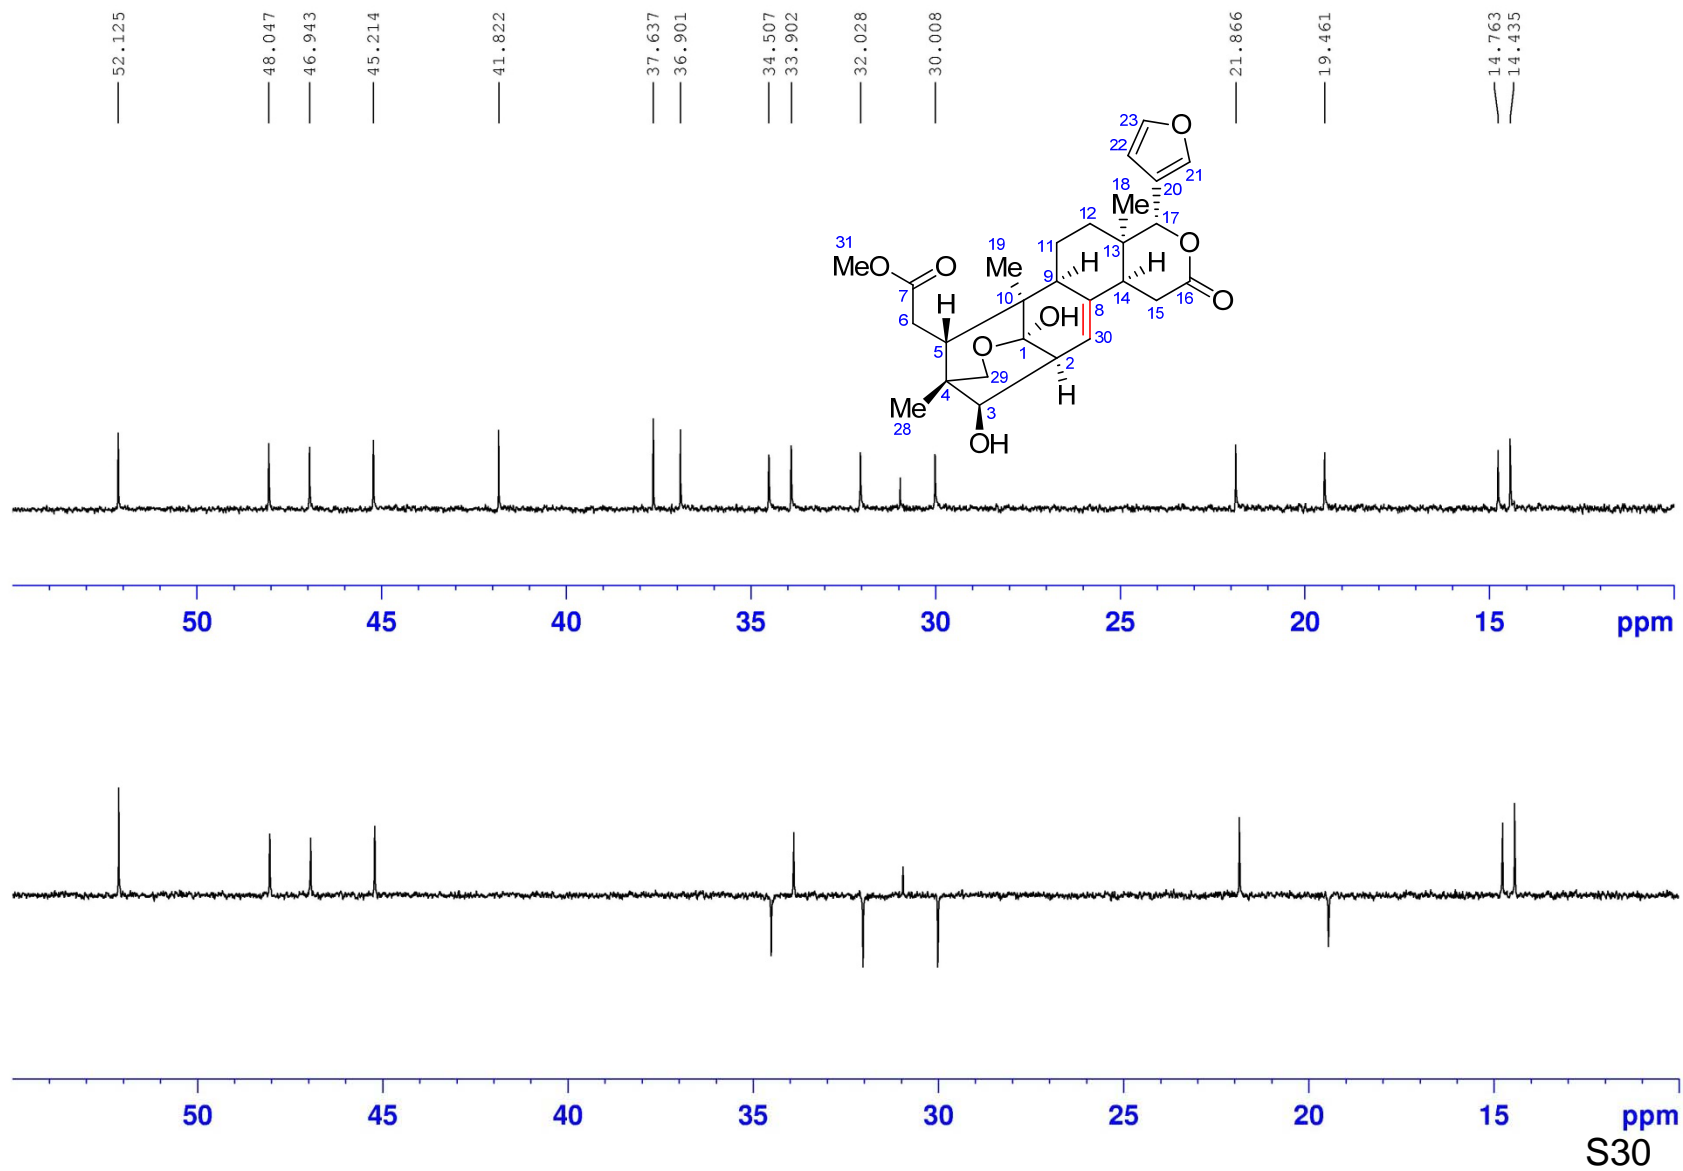

# HR-ESIMS for compound **8a**

## Generic Display Report

### Analysis Info

Analysis Name D:\Data\MS\data\201809\liwanshan\_WSD-72\_pos\_18\_01\_5579.d  
Method LC\_Direct Infusion\_pos\_100-1000mz.m  
Sample Name liwanshan\_WSD-72\_pos  
Comment

Acquisition Date 9/30/2018 6:19:21 PM

Operator SCSIO  
Instrument maXis

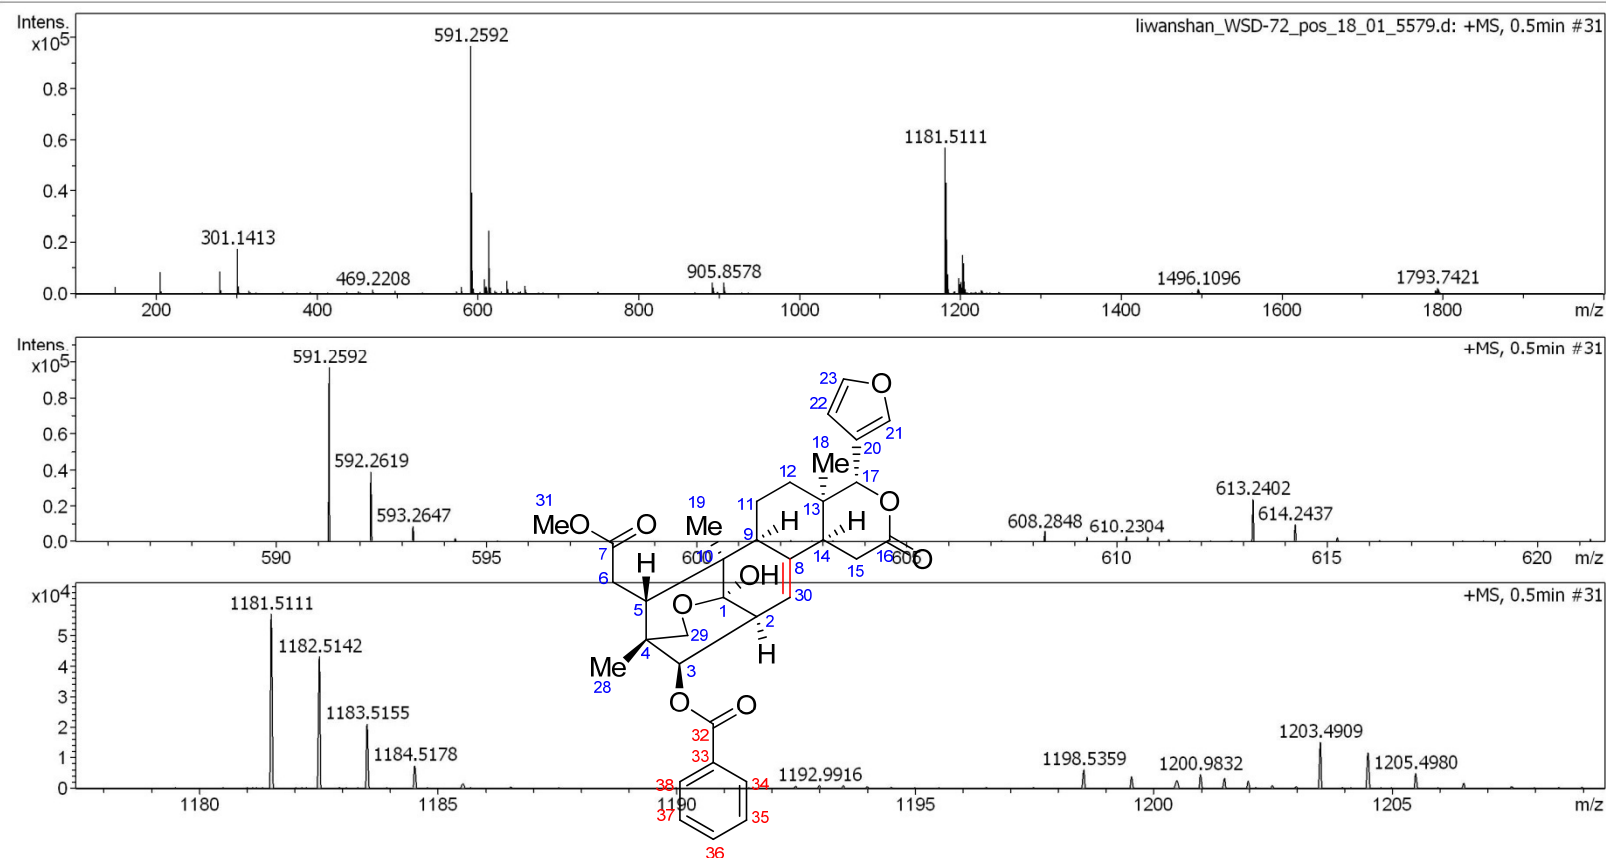

# HR-ESIMS for compound **8a**

## Mass Spectrum SmartFormula Report

### Analysis Info

Analysis Name D:\Data\MS\data\201809\liwanshan\_WSD-72\_pos\_18\_01\_5579.d  
 Method LC\_Direct Infusion\_pos\_100-1000mz.m  
 Sample Name liwanshan\_WSD-72\_pos  
 Comment

Acquisition Date 9/30/2018 6:19:21 PM  
 Operator SCSIO  
 Instrument maXis 255552.00029

### Acquisition Parameter

|             |          |                      |          |                  |           |
|-------------|----------|----------------------|----------|------------------|-----------|
| Source Type | ESI      | Ion Polarity         | Positive | Set Nebulizer    | 0.4 Bar   |
| Focus       | Active   | Set Capillary        | 4500 V   | Set Dry Heater   | 180 °C    |
| Scan Begin  | 100 m/z  | Set End Plate Offset | -500 V   | Set Dry Gas      | 4.0 l/min |
| Scan End    | 2000 m/z | Set Charging Voltage | 0 V      | Set Divert Valve | Waste     |
|             |          | Set Corona           | 0 nA     | Set APCI Heater  | 0 °C      |

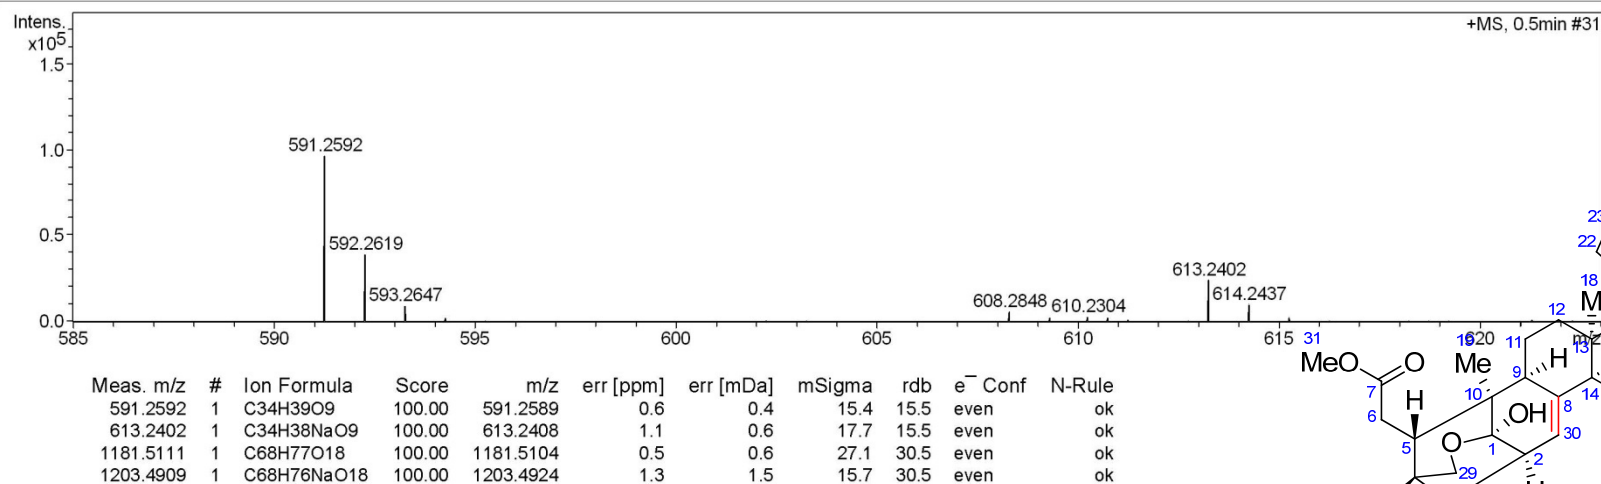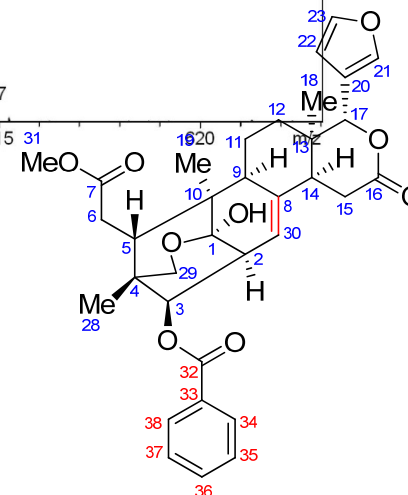

liwanshan\_WSD-72\_pos\_18\_01\_5579.d

Bruker Compass DataAnalysis 4.1

printed: 9/30/2018 6:35:54 PM

by: SCSIO

Page 1 of 1

$^1\text{H}$  NMR (400 MHz) spectrum of **8a** in  $\text{CDCl}_3$

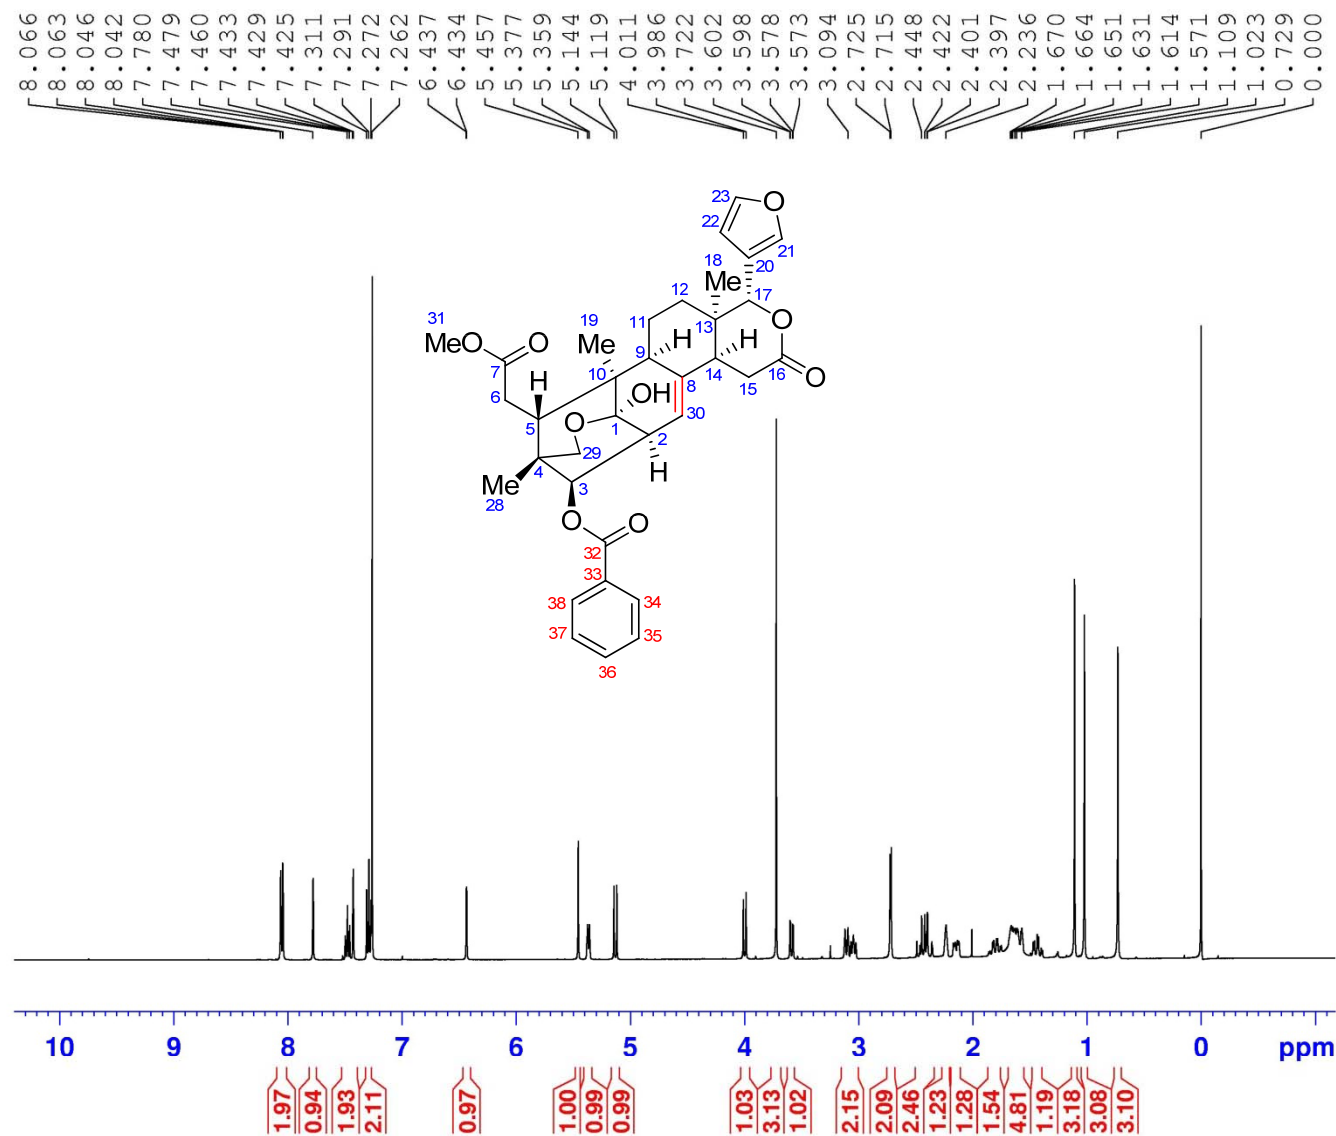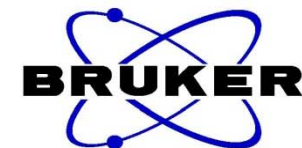

```

NAME      czc-1-CH3-BENJIASUAN
EXPNO     1
PROCNO    1
Date_     20171012
Time      16.15
INSTRUM   spect
PROBHD    5 mm CPPBBO BB
PULPROG   zg30
TD        65536
SOLVENT   CDCl3
NS        16
DS        2
SWH       8223.685 Hz
FIDRES    0.125483 Hz
AQ        3.9846387 sec
RG        208.5
DW        60.800 usec
DE        10.00 usec
TE        297.0 K
D1        1.00000000 sec
TD0       1

===== CHANNEL f1 =====
SFO1      400.1324710 MHz
NUC1      1H
P1        11.50 usec
SI        65536
SF        400.1300089 MHz
WDW       EM
SSB       0
LB        0.30 Hz
GB        0
PC        1.00
    
```

$^1\text{H}$  NMR (400 MHz) spectrum of **8a** in  $\text{CDCl}_3$

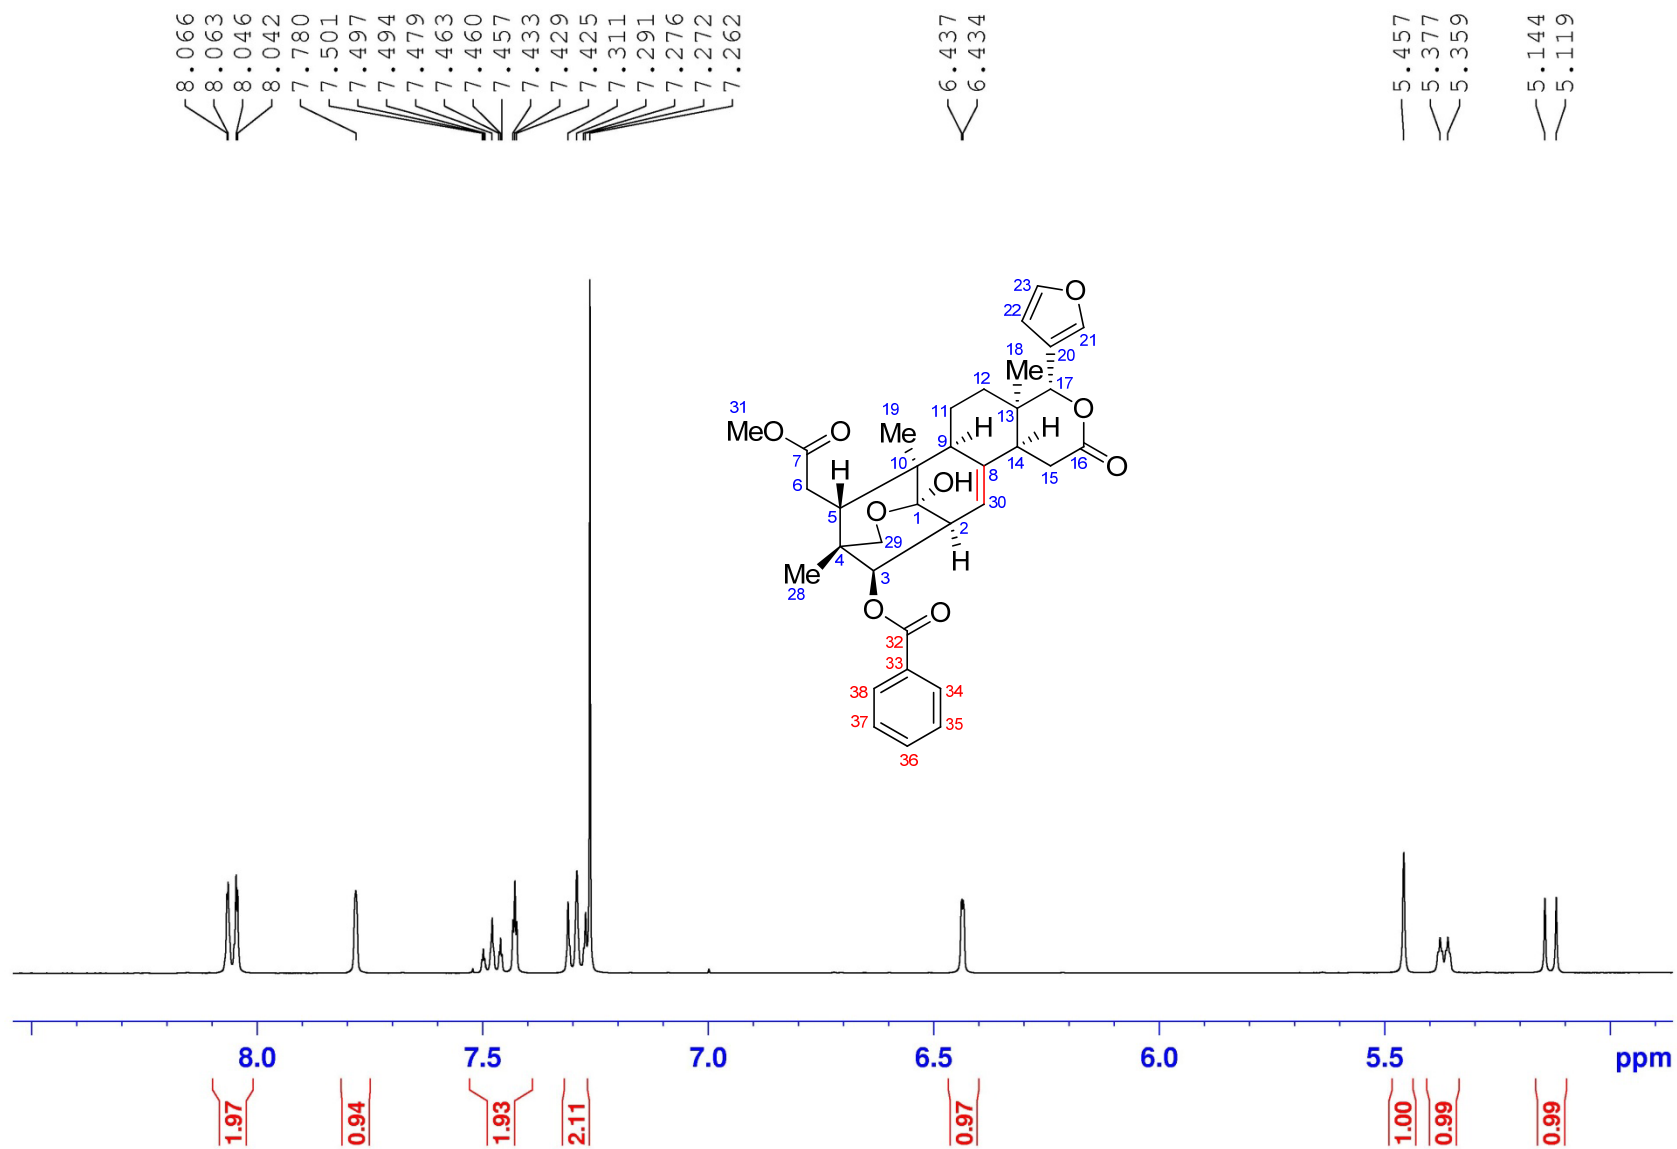



$^1\text{H}$  NMR (400 MHz) spectrum of **8a** in  $\text{CDCl}_3$

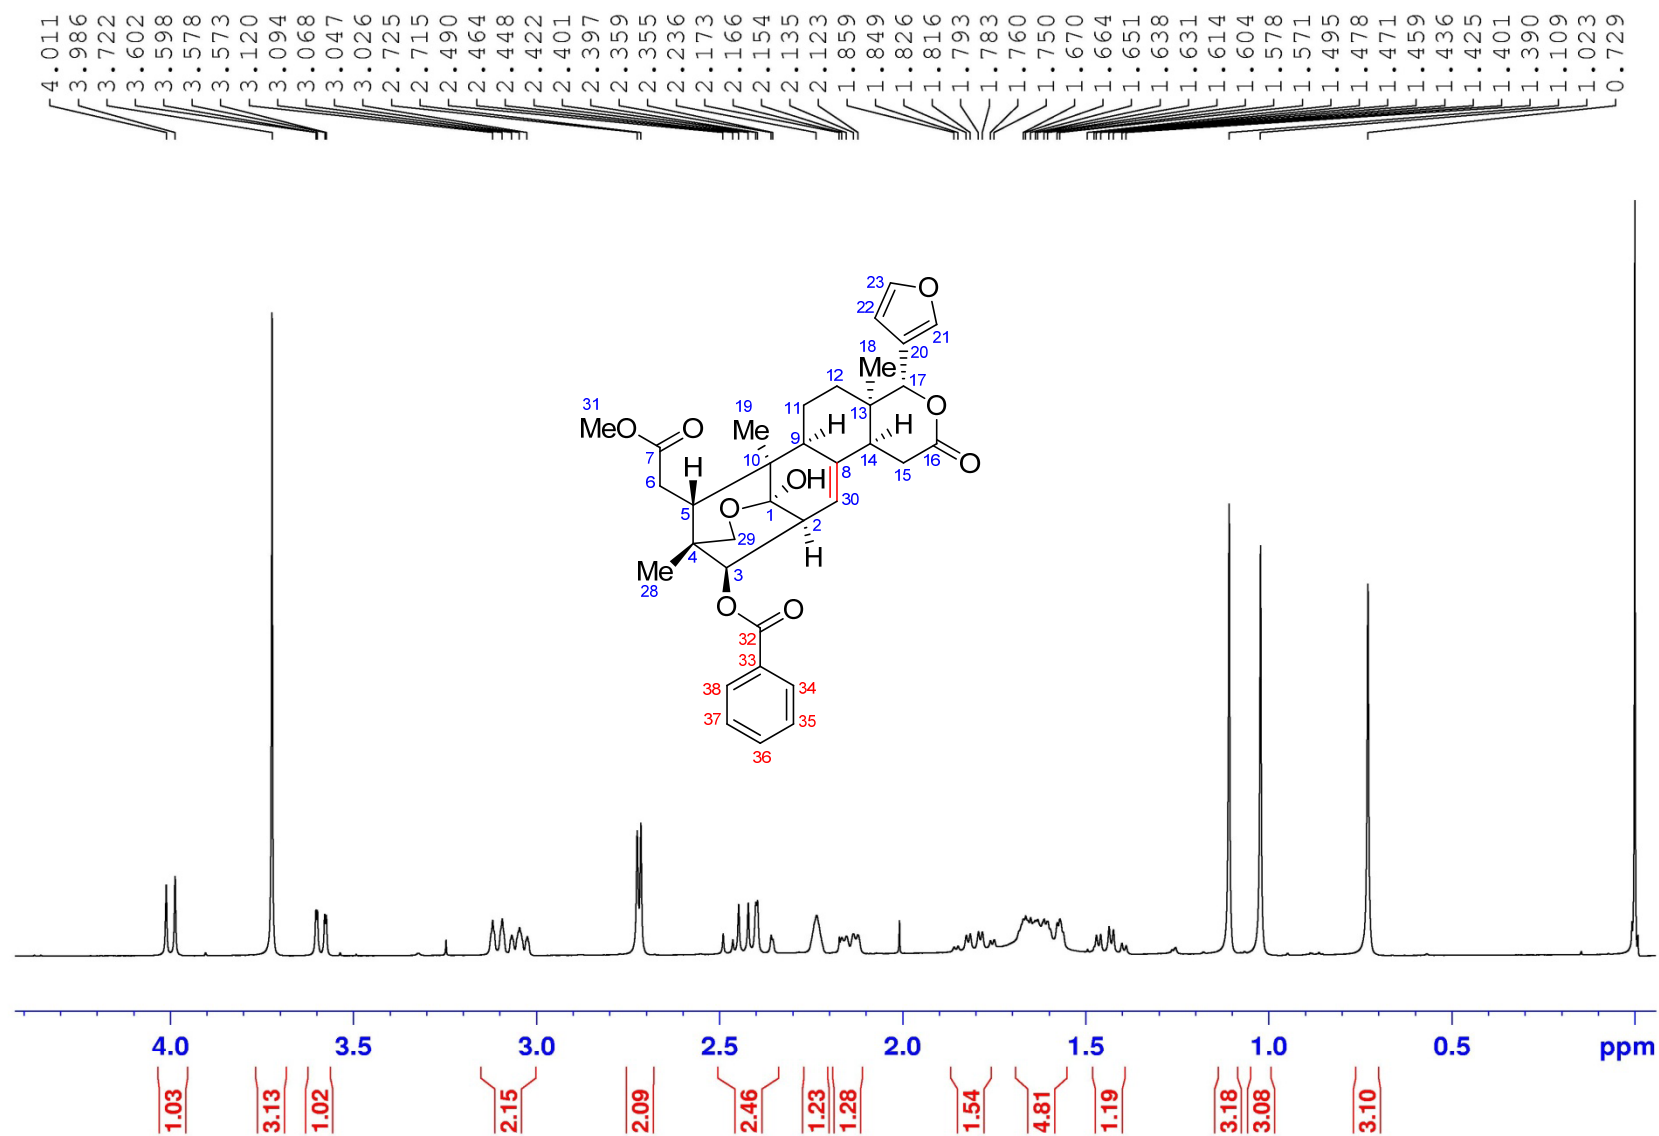

$^{13}\text{C}$  NMR (100 MHz) spectrum of **8a** in  $\text{CDCl}_3$

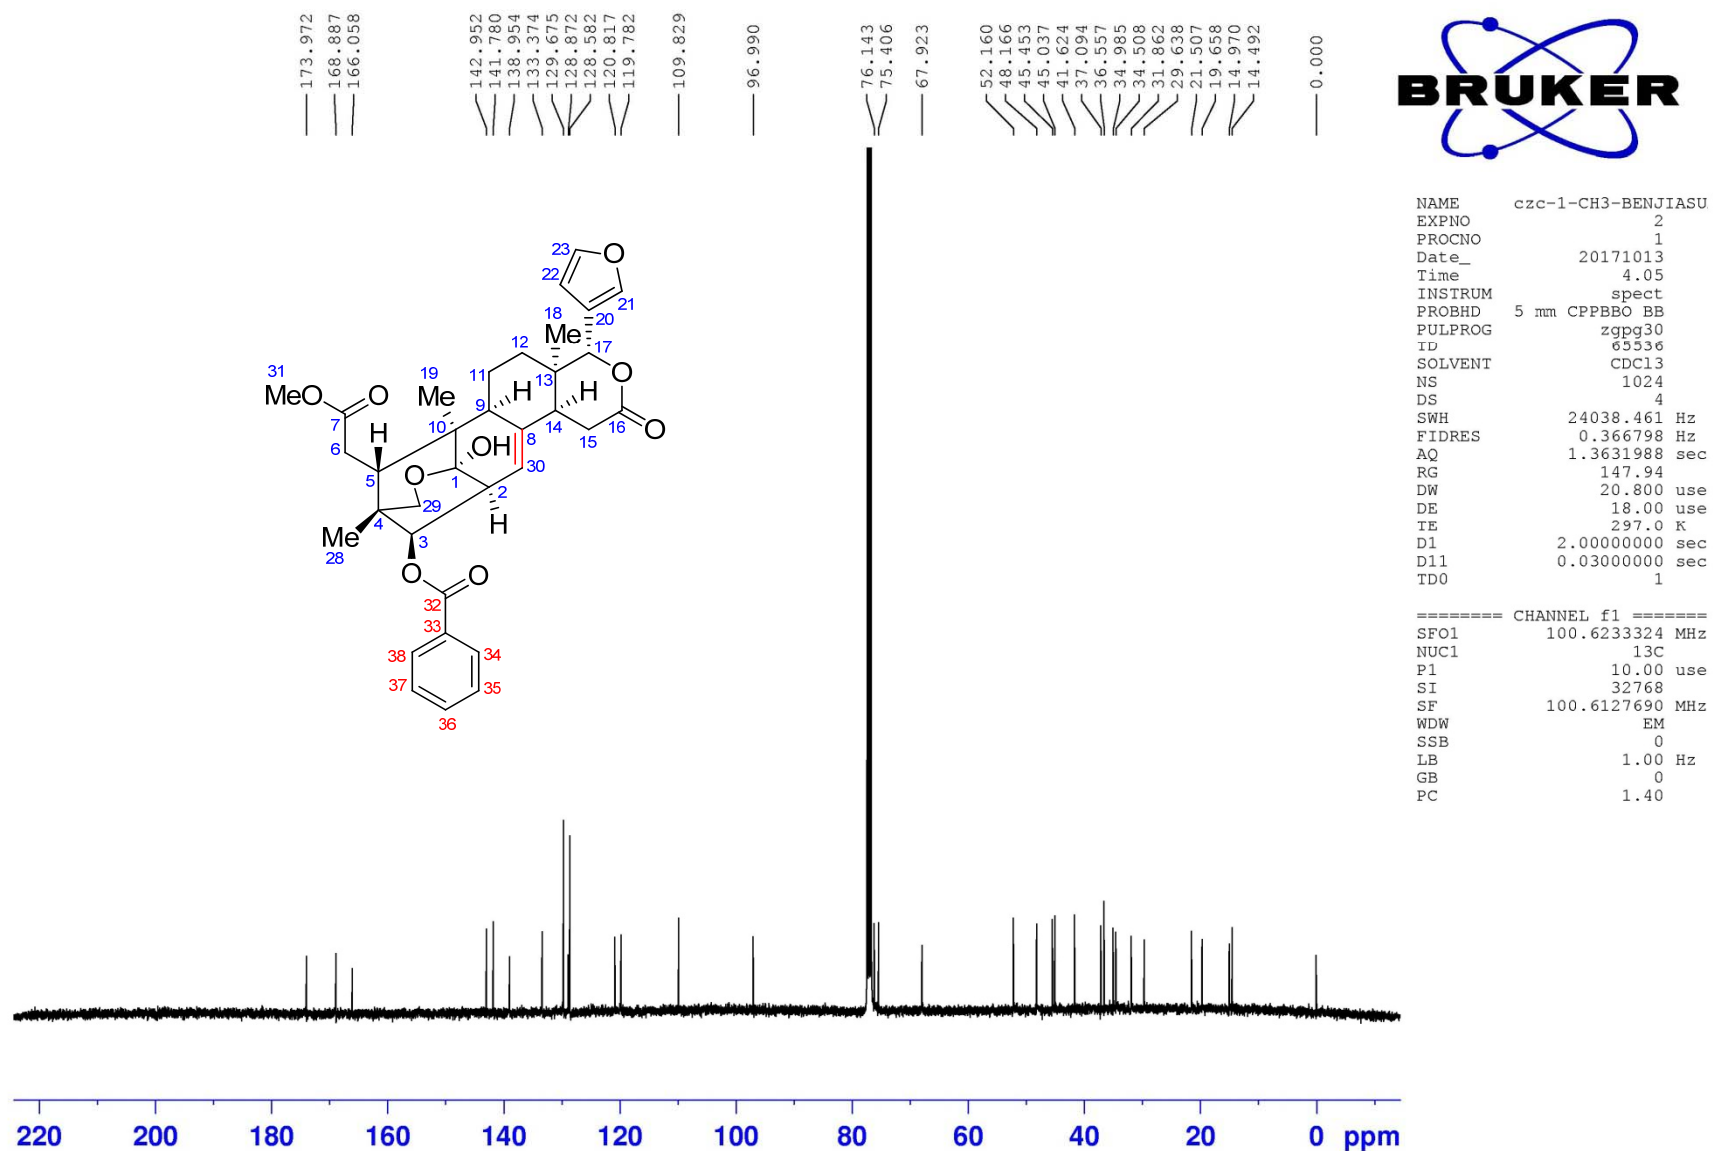

$^{13}\text{C}$  NMR (100 MHz) spectrum of **8a** in  $\text{CDCl}_3$

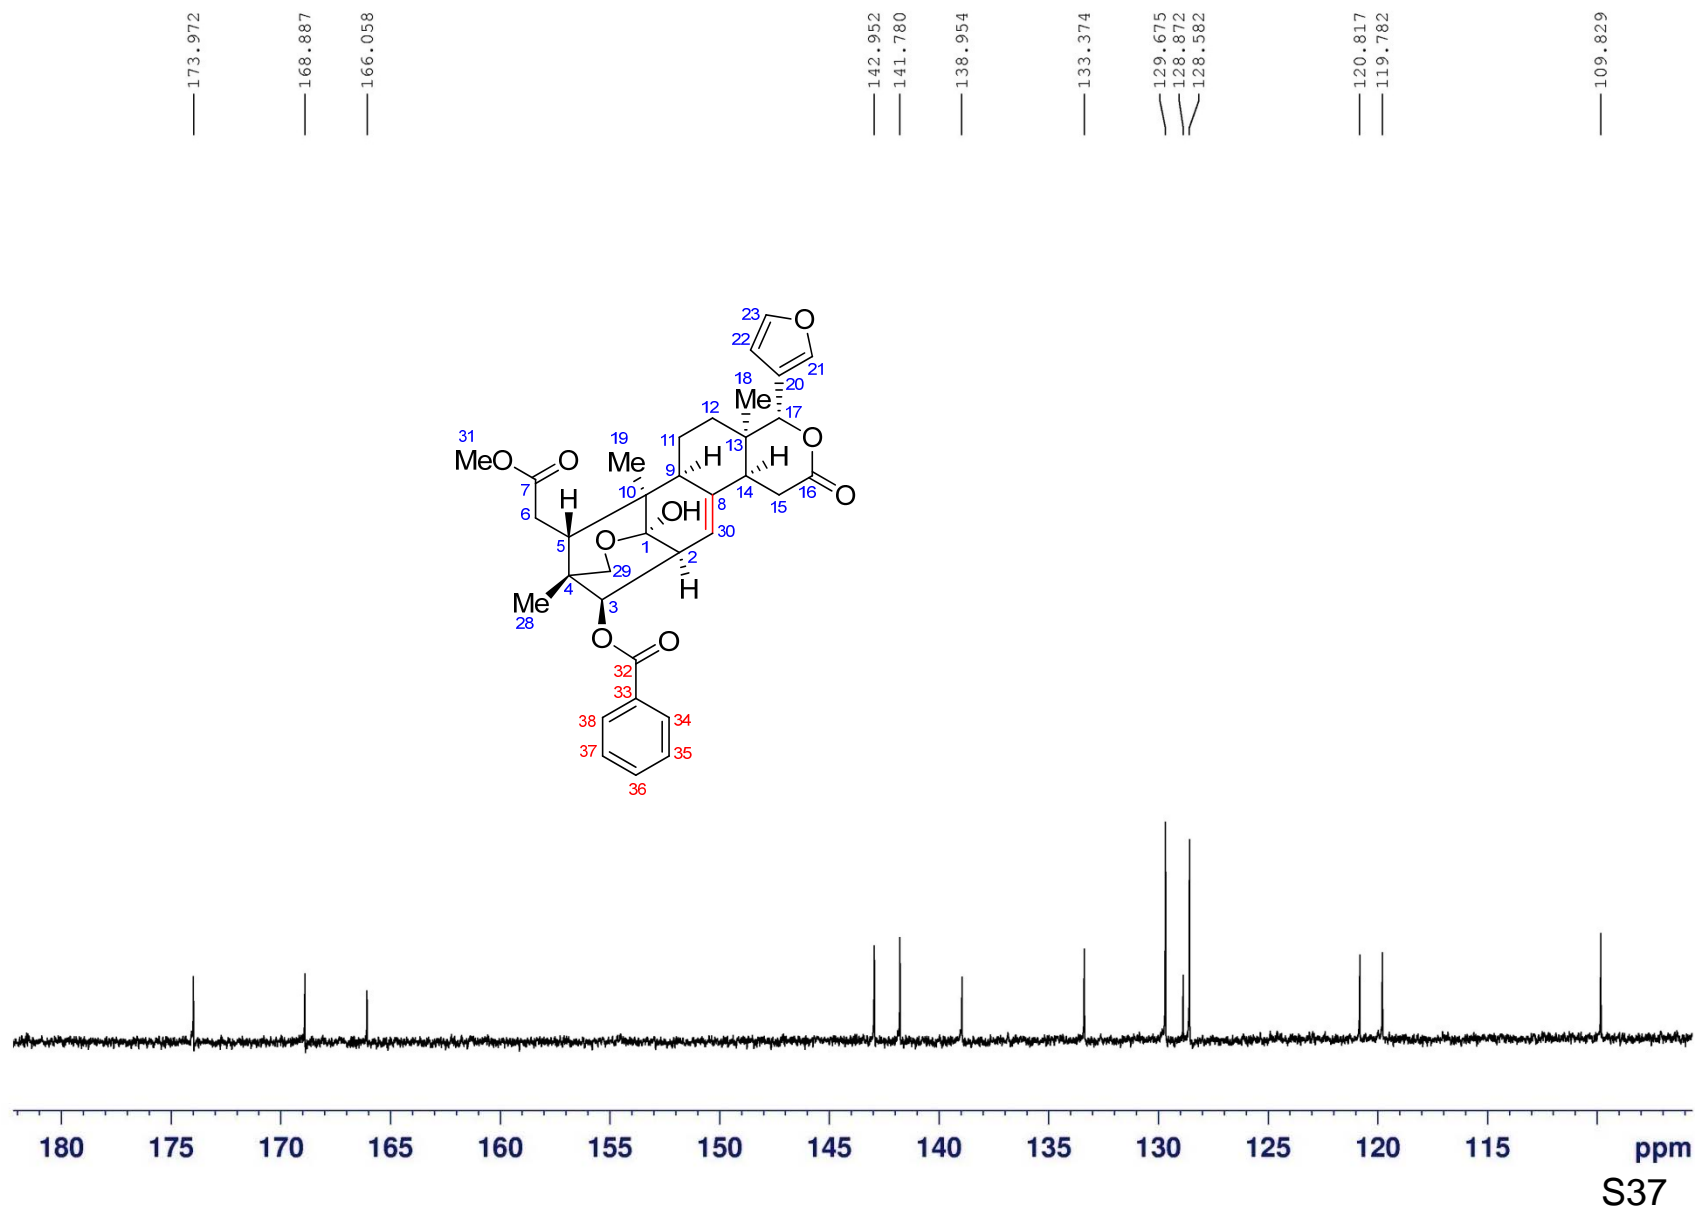

$^{13}\text{C}$  NMR (100 MHz) spectrum of **8a** in  $\text{CDCl}_3$

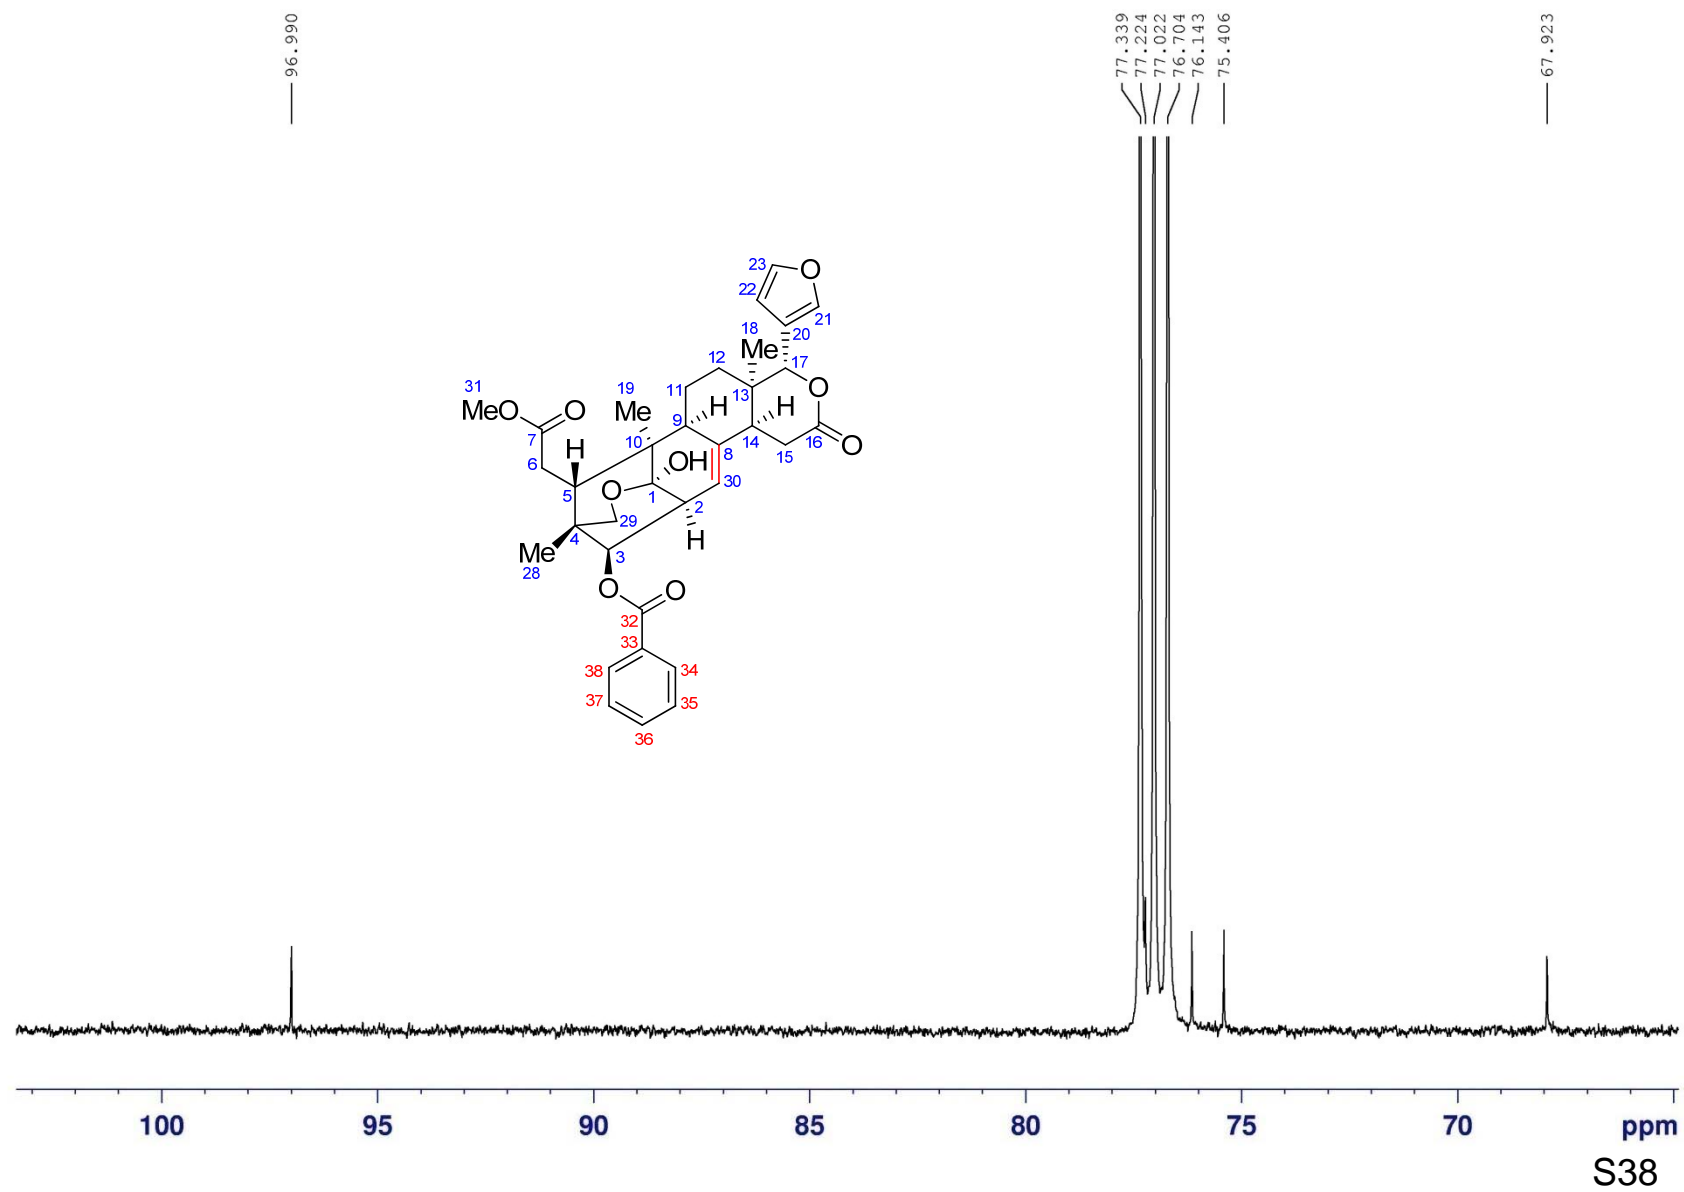

$^{13}\text{C}$  NMR (100 MHz) spectrum of **8a** in  $\text{CDCl}_3$

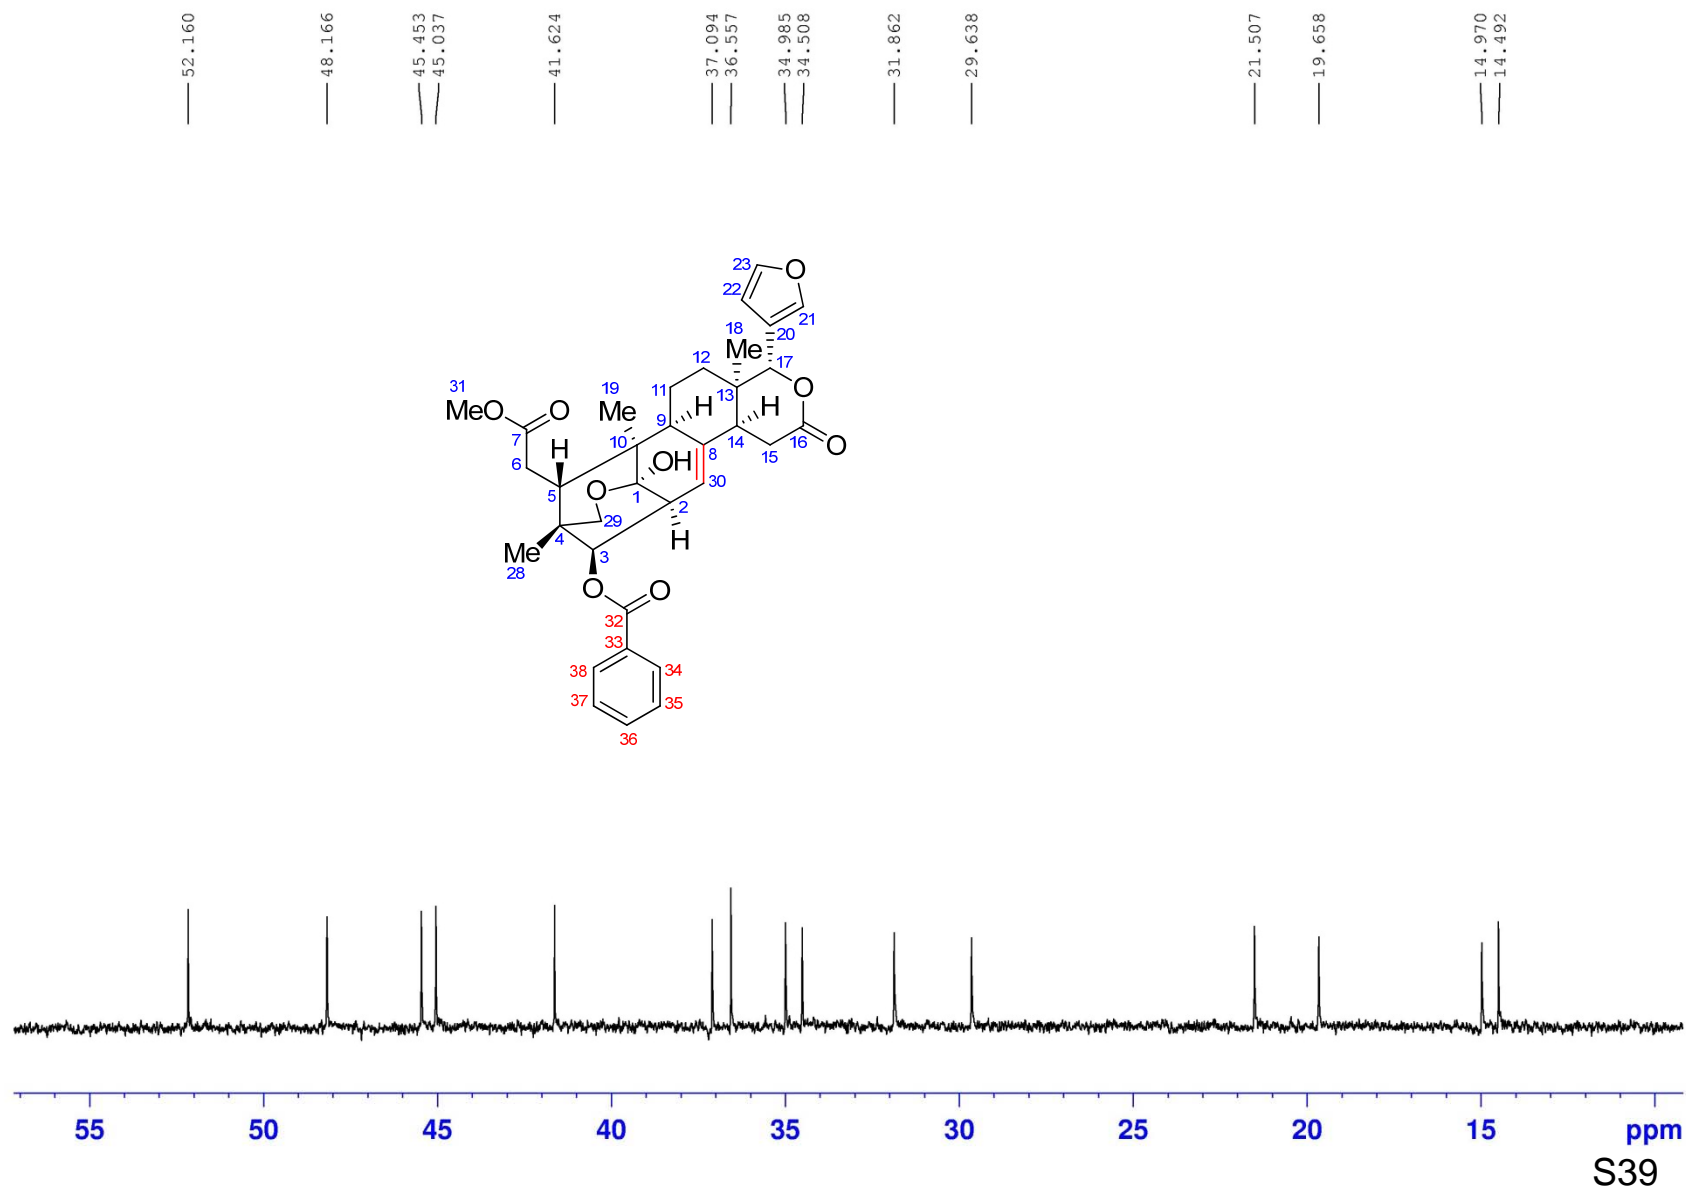

# DEPT 135 spectrum of **8a** in CDCl<sub>3</sub>

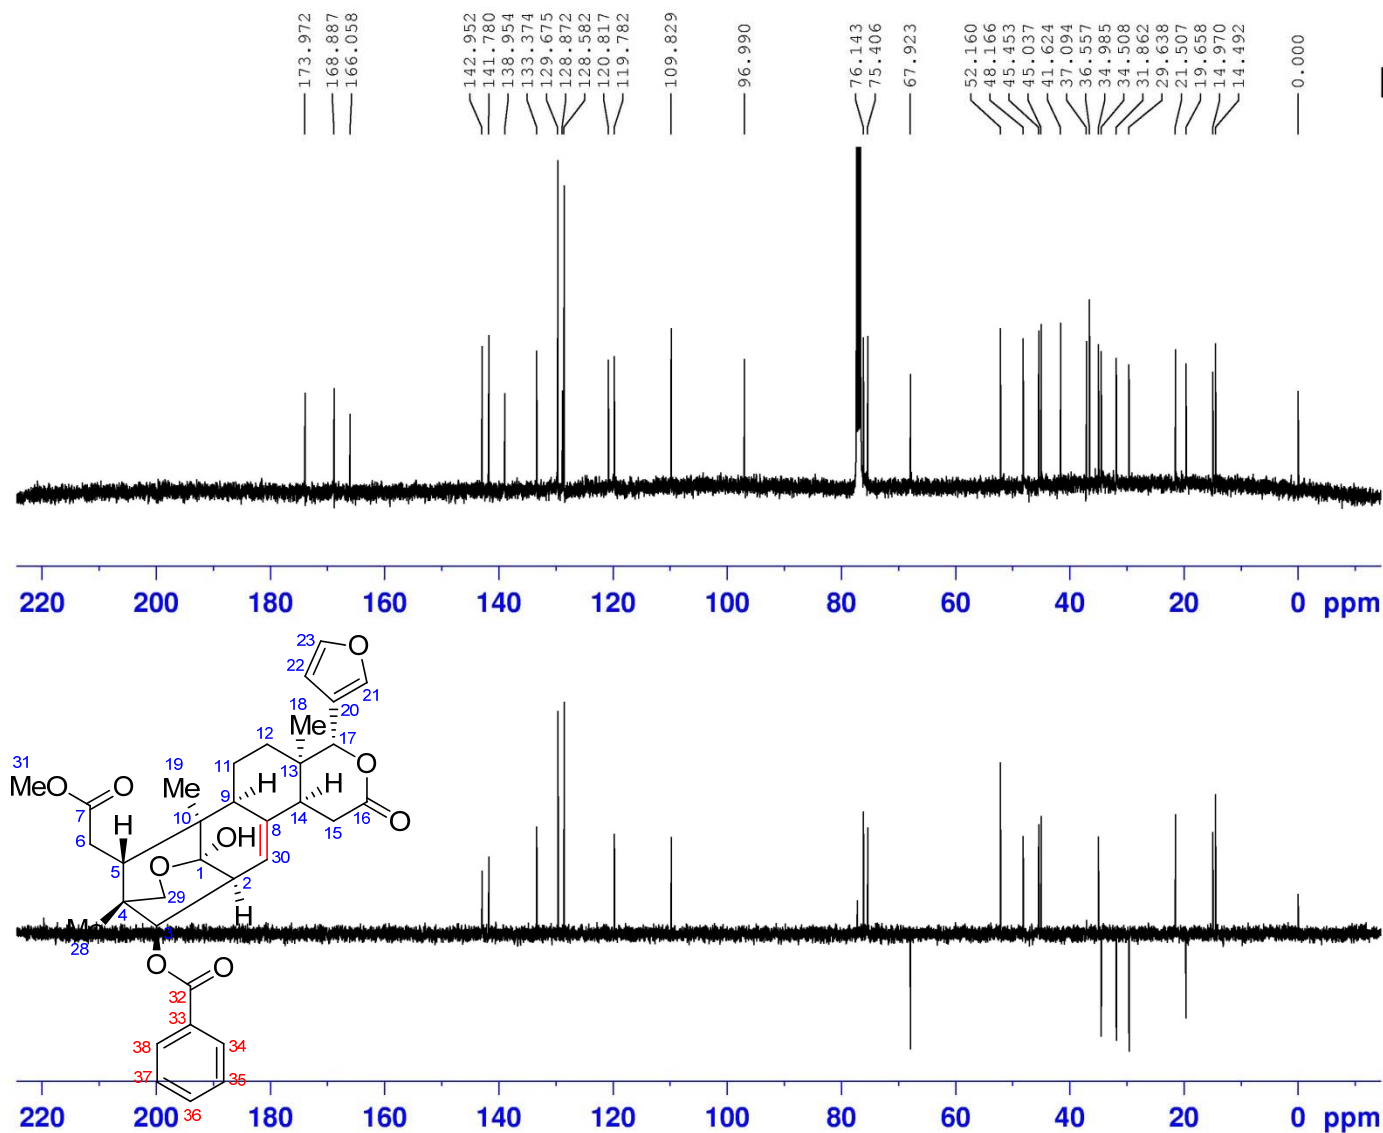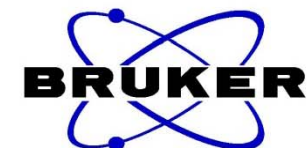

```

NAME      czc-1-CH3-BENJIASUAN
EXPNO     3
PROCNO    1
Date_     20171013
Time      4.23
INSTRUM   spect
PROBHD    5 mm CPPBBO BB
PULPROG   deptsp135
TD        65536
SOLVENT   CDCl3
NS        300
DS        4
SWH       24038.461 Hz
FIDRES    0.366798 Hz
AQ        1.3631988 sec
RG        85.34
DW        20.800 usec
DE        18.00 usec
TE        297.0 K
CNST2     145.0000000
D1        2.00000000 sec
D2        0.00344828 sec
D12       0.00002000 sec
TD0       1
    
```

```

===== CHANNEL f1 =====
SFO1    100.6233324 MHz
NUC1     13C
P1       10.00 usec
P13      2000.00 usec
SI       32768
SF      100.6127692 MHz
WDW      EM
SSB      0
LB       1.00 Hz
GB       0
PC       1.40
    
```

# DEPT 135 spectrum of **8a** in CDCl<sub>3</sub>

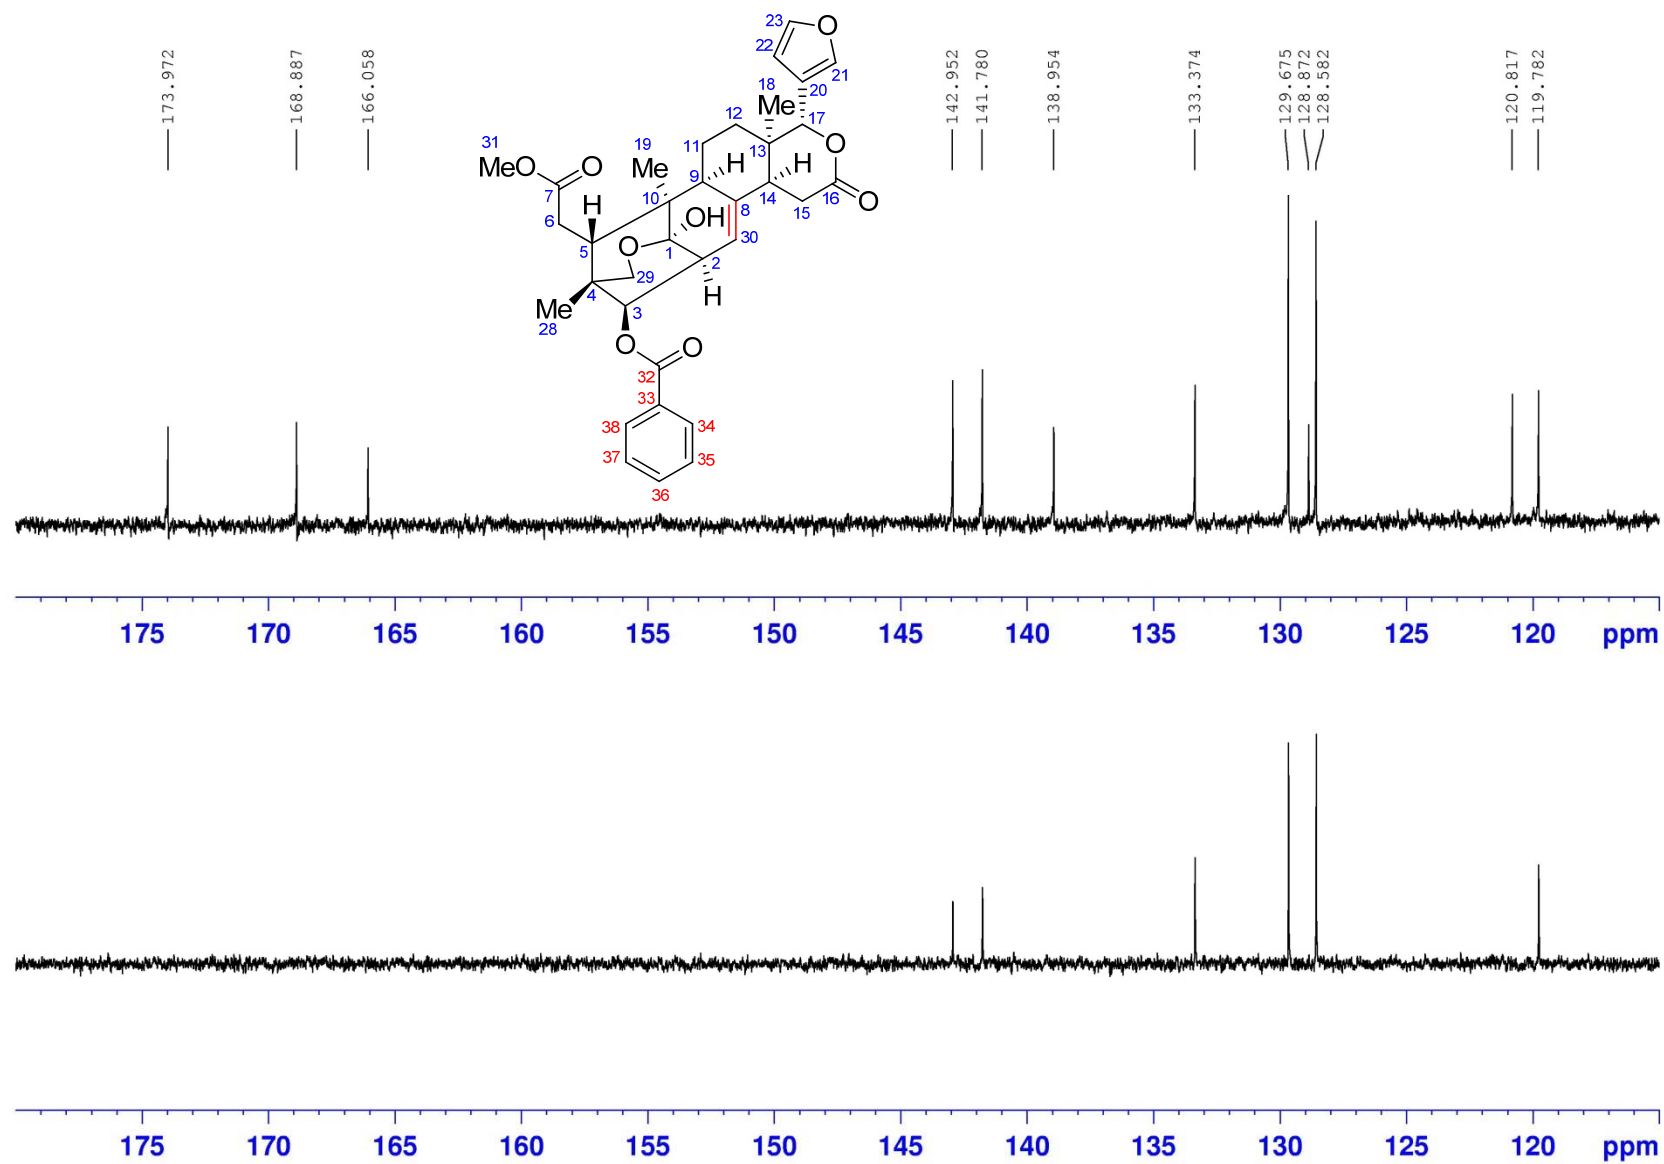

DEPT 135 spectrum of **8a** in CDCl<sub>3</sub>

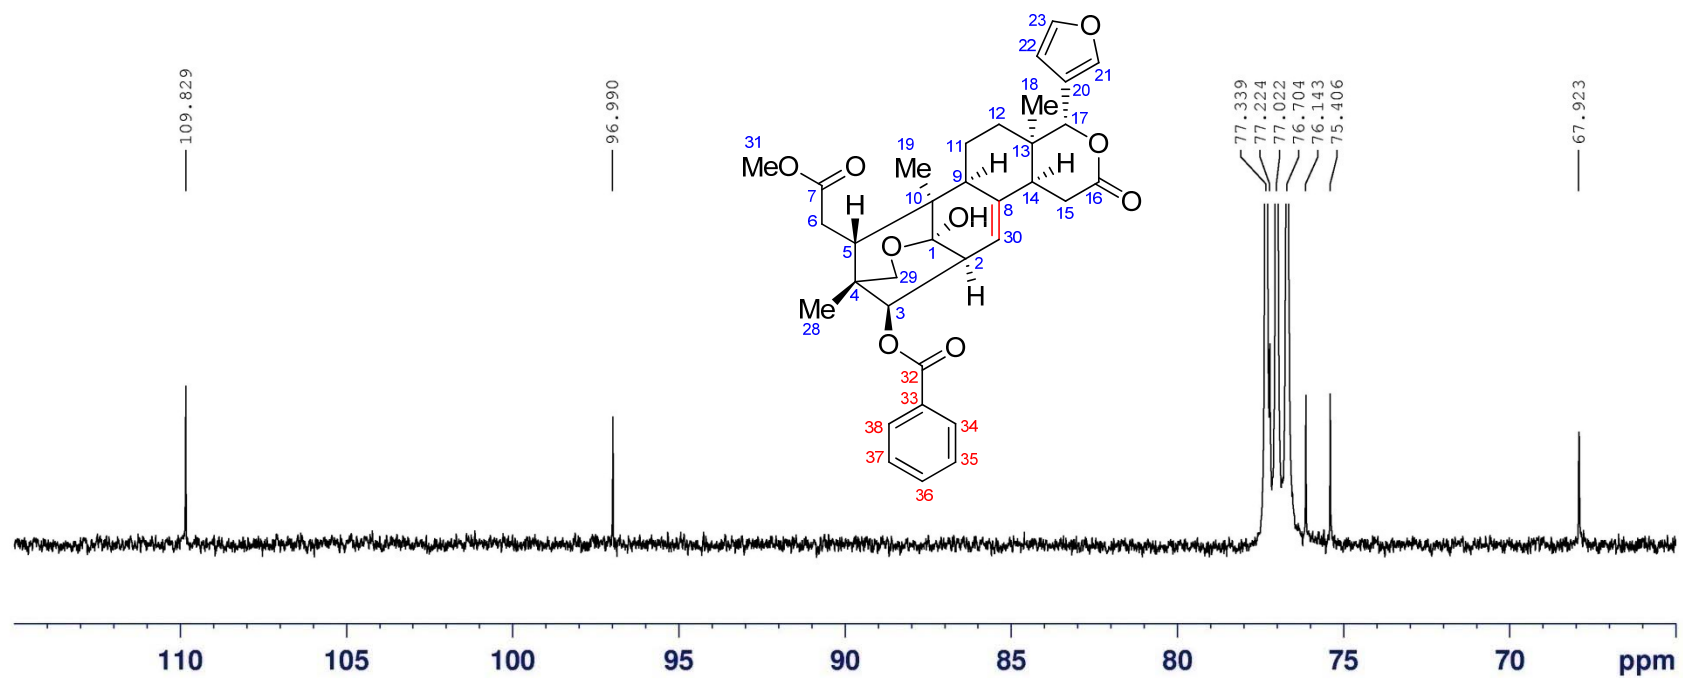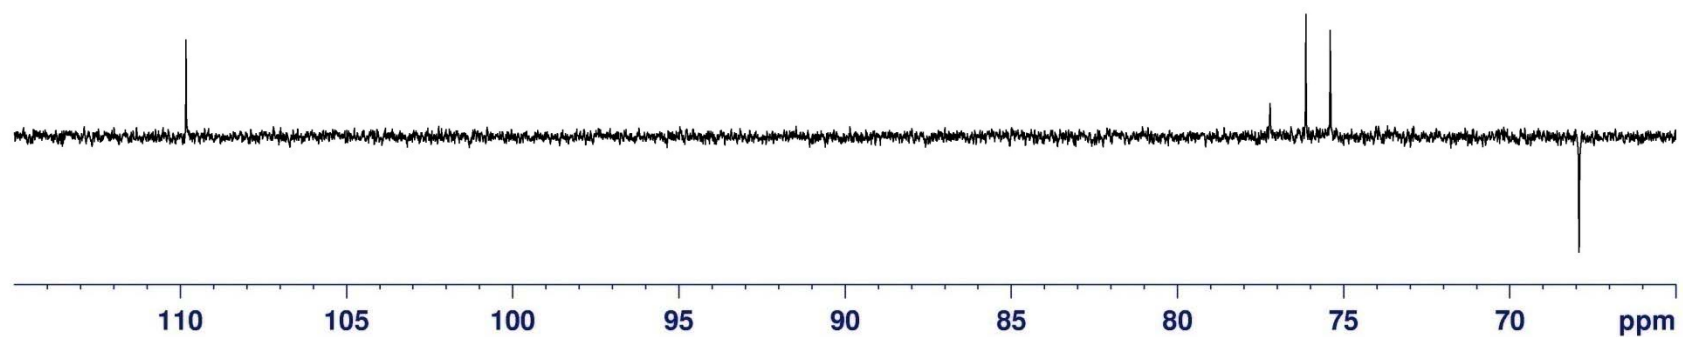



# DEPT 135 spectrum of **8a** in CDCl<sub>3</sub>

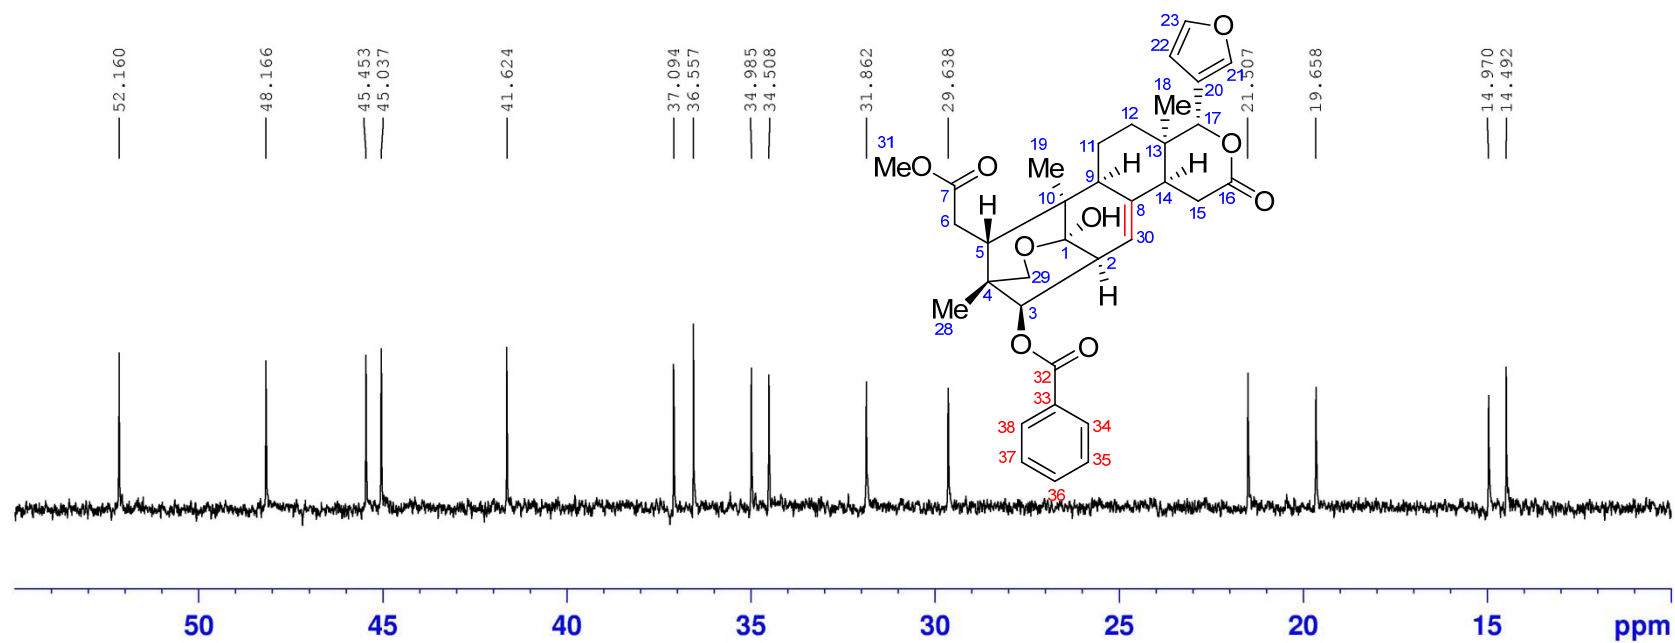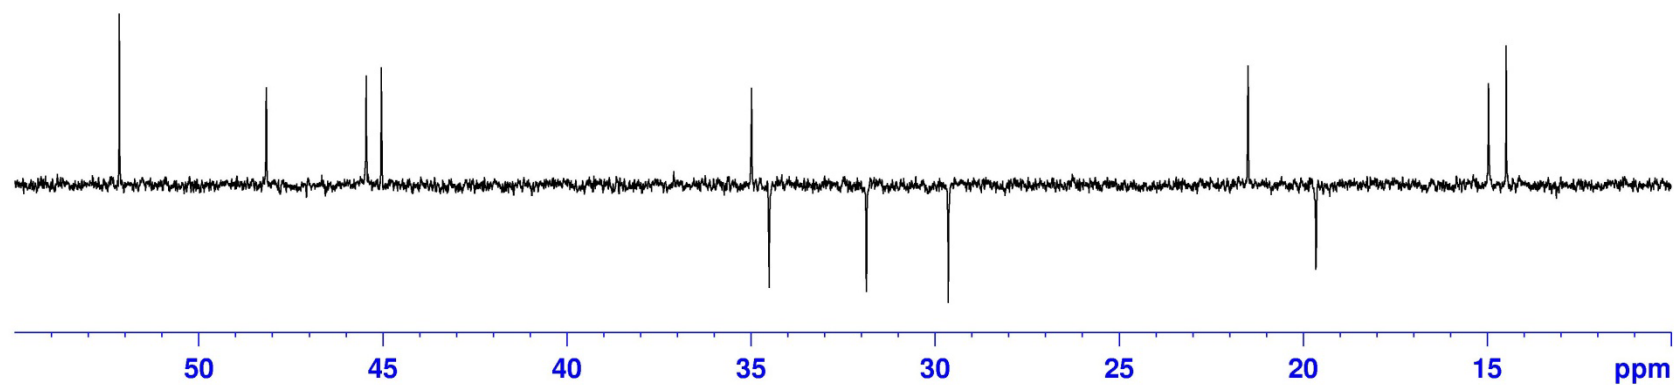

# HR-ESIMS for compound **8b**

## Generic Display Report

### Analysis Info

Analysis Name D:\Data\MS\data\201809\liwanshan\_WSD-69\_pos\_15\_01\_5576.d  
Method LC\_Direct Infusion\_pos\_100-1000mz.m  
Sample Name liwanshan\_WSD-69\_pos  
Comment

Acquisition Date 9/30/2018 6:08:56 PM

Operator SCSIO  
Instrument maXis

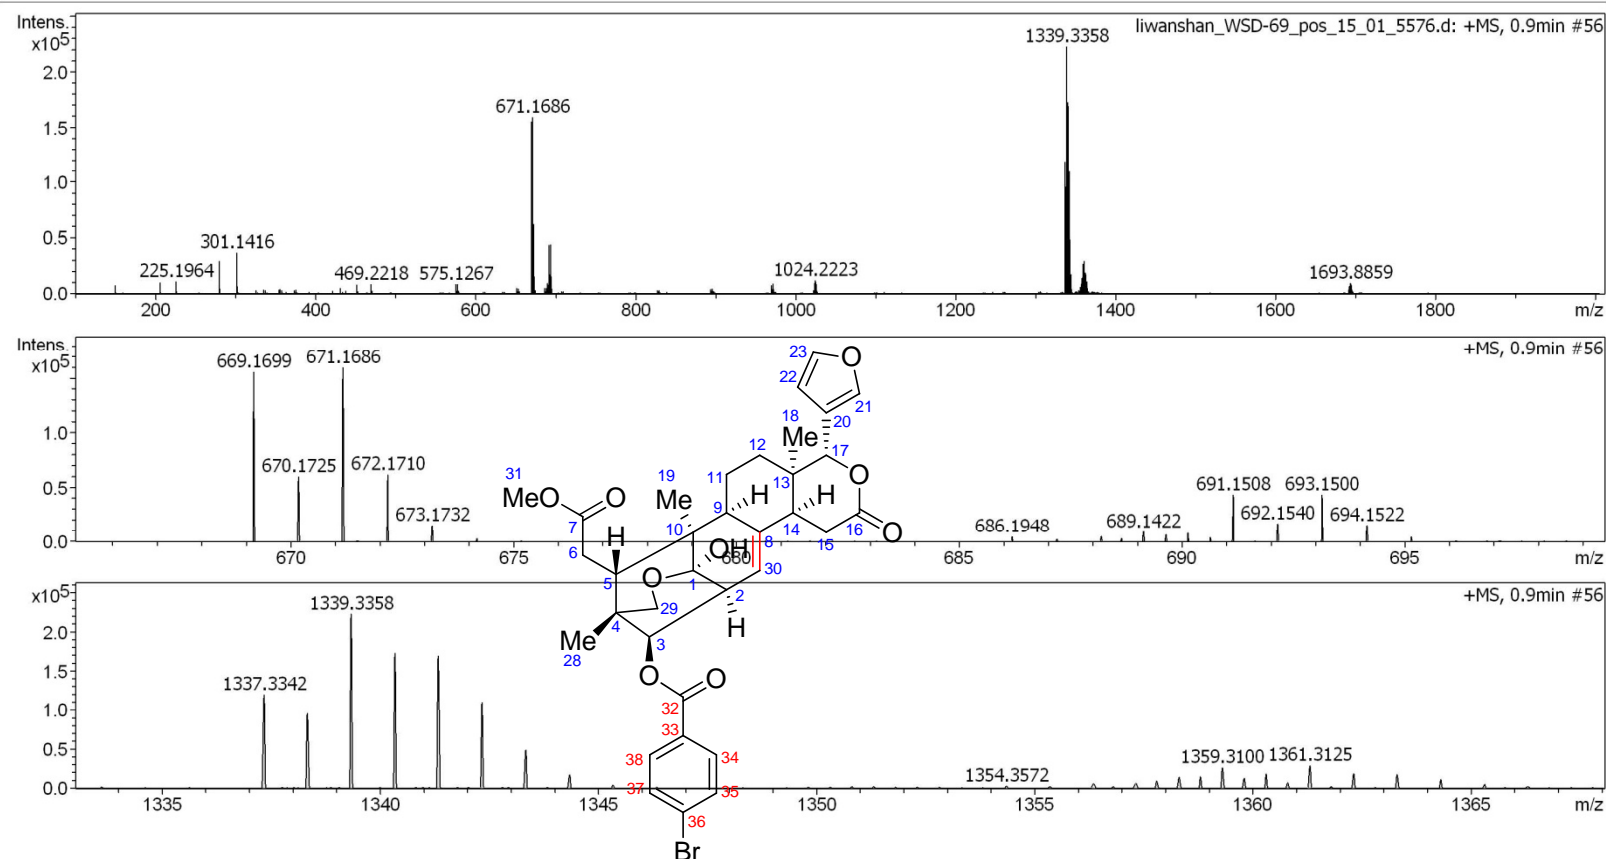

# HR-ESIMS for compound **8b**

## Mass Spectrum SmartFormula Report

### Analysis Info

Analysis Name D:\Data\MS\data\201809\liwanshan\_WSD-69\_pos\_15\_01\_5576.d  
 Method LC\_Direct Infusion\_pos\_100-1000mz.m  
 Sample Name liwanshan\_WSD-69\_pos  
 Comment

Acquisition Date 9/30/2018 6:08:56 PM  
 Operator SCSIO  
 Instrument maXis 255552.00029

### Acquisition Parameter

|             |          |                      |          |                  |           |
|-------------|----------|----------------------|----------|------------------|-----------|
| Source Type | ESI      | Ion Polarity         | Positive | Set Nebulizer    | 0.4 Bar   |
| Focus       | Active   | Set Capillary        | 4500 V   | Set Dry Heater   | 180 °C    |
| Scan Begin  | 100 m/z  | Set End Plate Offset | -500 V   | Set Dry Gas      | 4.0 l/min |
| Scan End    | 2000 m/z | Set Charging Voltage | 0 V      | Set Divert Valve | Waste     |
|             |          | Set Corona           | 0 nA     | Set APCI Heater  | 0 °C      |

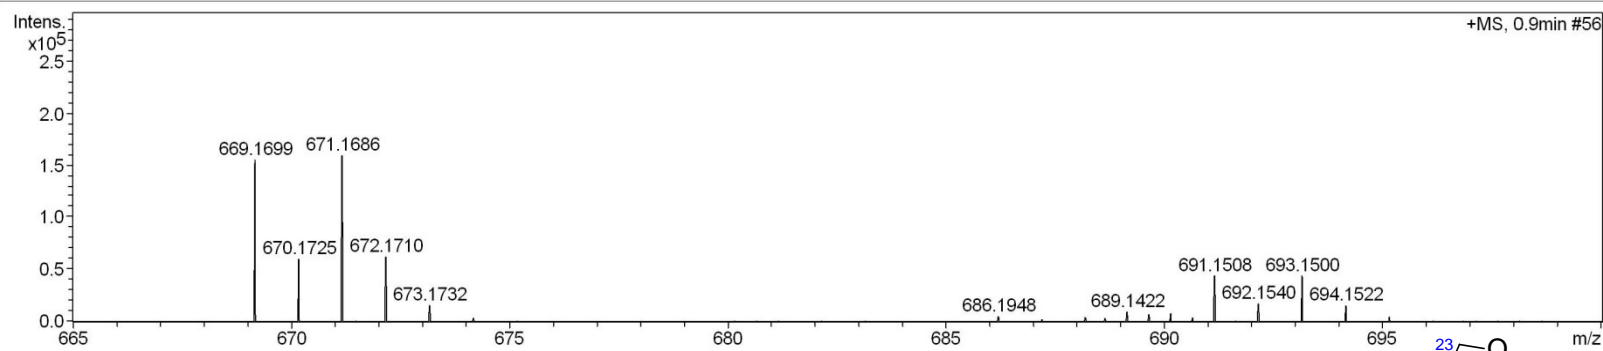

| Meas. m/z | # | Ion Formula  | Score  | m/z       | err [ppm] | err [mDa] | mSigma | rdB  | e <sup>-</sup> Conf | N-Rule |
|-----------|---|--------------|--------|-----------|-----------|-----------|--------|------|---------------------|--------|
| 669.1699  | 1 | C34H38BrO9   | 100.00 | 669.1694  | 0.8       | 0.5       | 21.4   | 15.5 | even                | ok     |
| 691.1508  | 1 | C34H37BrNaO9 | 100.00 | 691.1513  | 0.8       | 0.5       | 28.4   | 15.5 | even                | ok     |
| 1337.3342 | 1 | C68H75Br2O18 | 100.00 | 1337.3315 | 2.0       | 2.7       | 70.3   | 30.5 | even                | ok     |

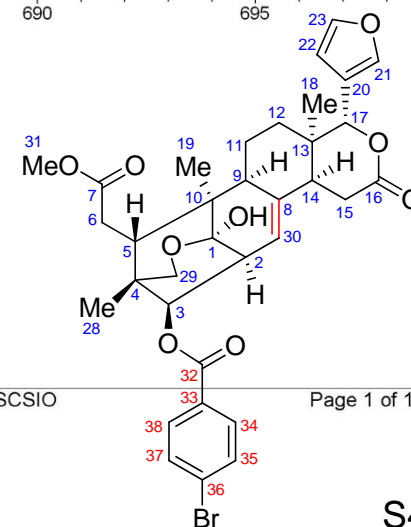

liwanshan\_WSD-69\_pos\_15\_01\_5576.d  
 Bruker Compass DataAnalysis 4.1

printed: 9/30/2018 6:23:15 PM

by: SCSIO

Page 1 of 1

S45

$^1\text{H}$  NMR (400 MHz) spectrum of **8b** in  $\text{CDCl}_3$

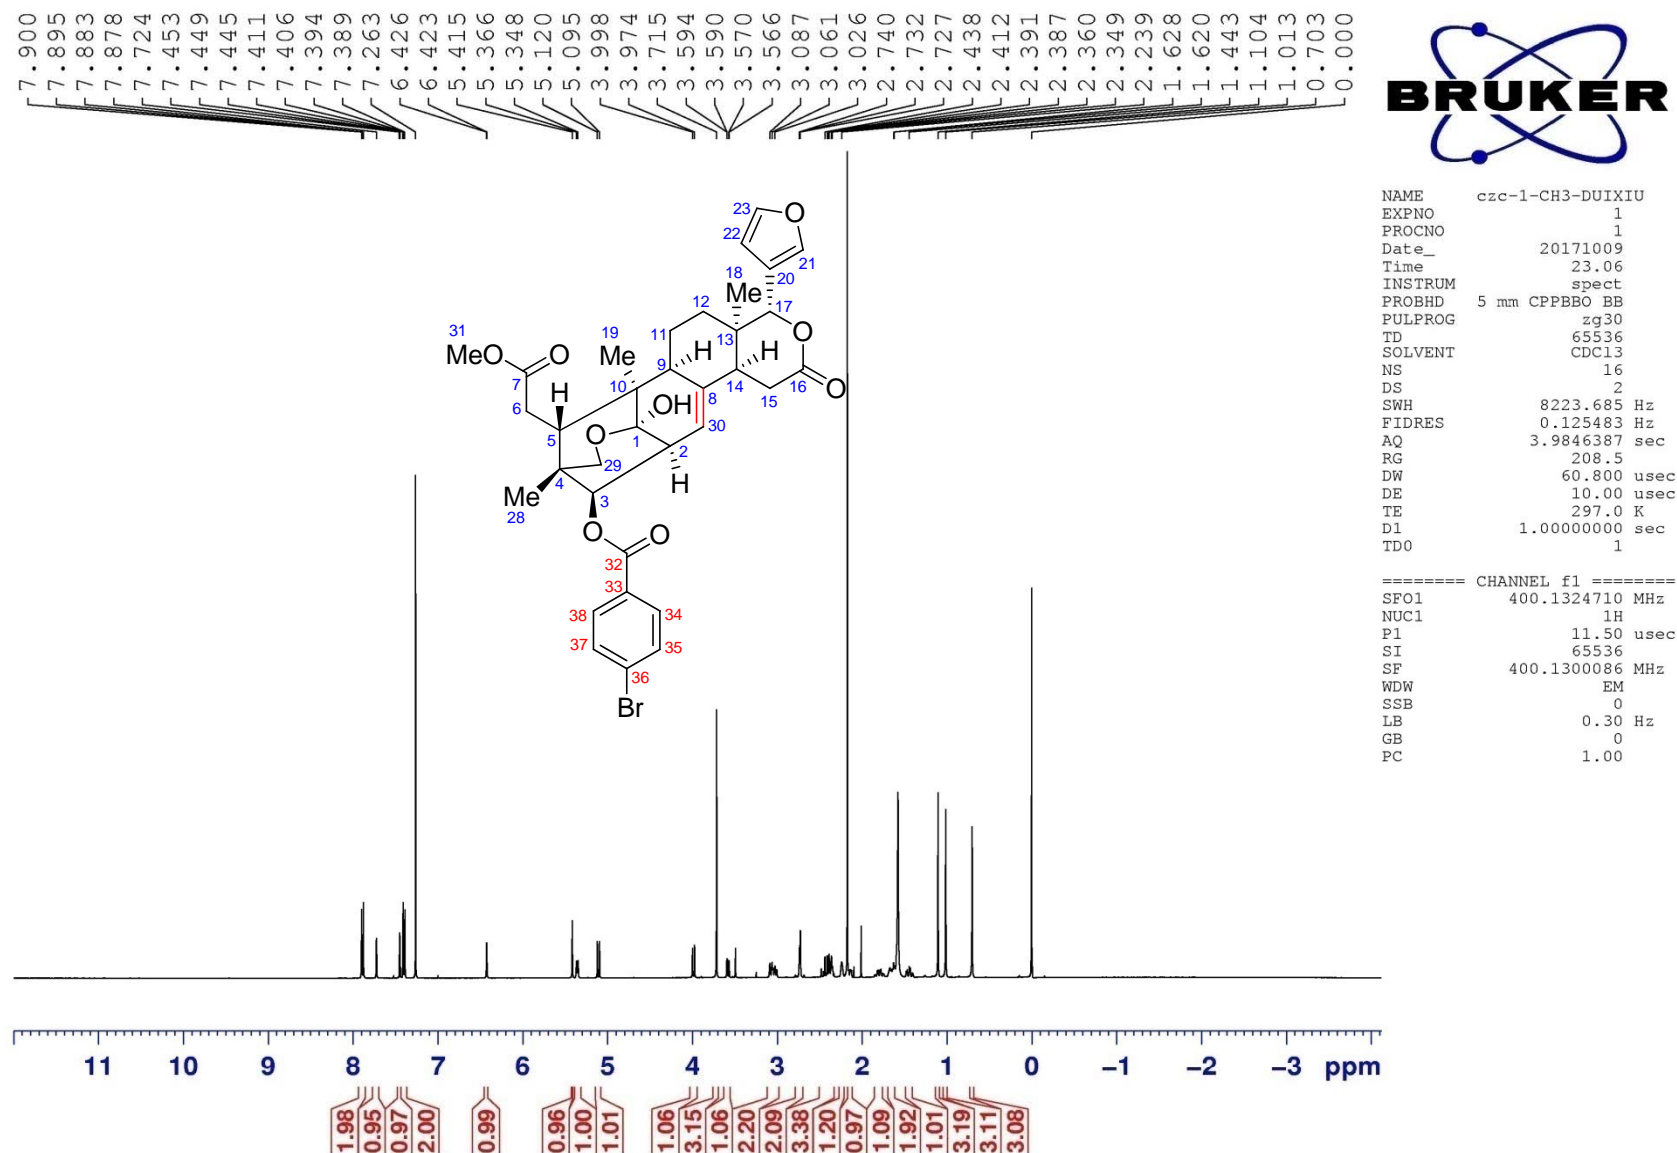

$^1\text{H}$  NMR (400 MHz) spectrum of **8b** in  $\text{CDCl}_3$

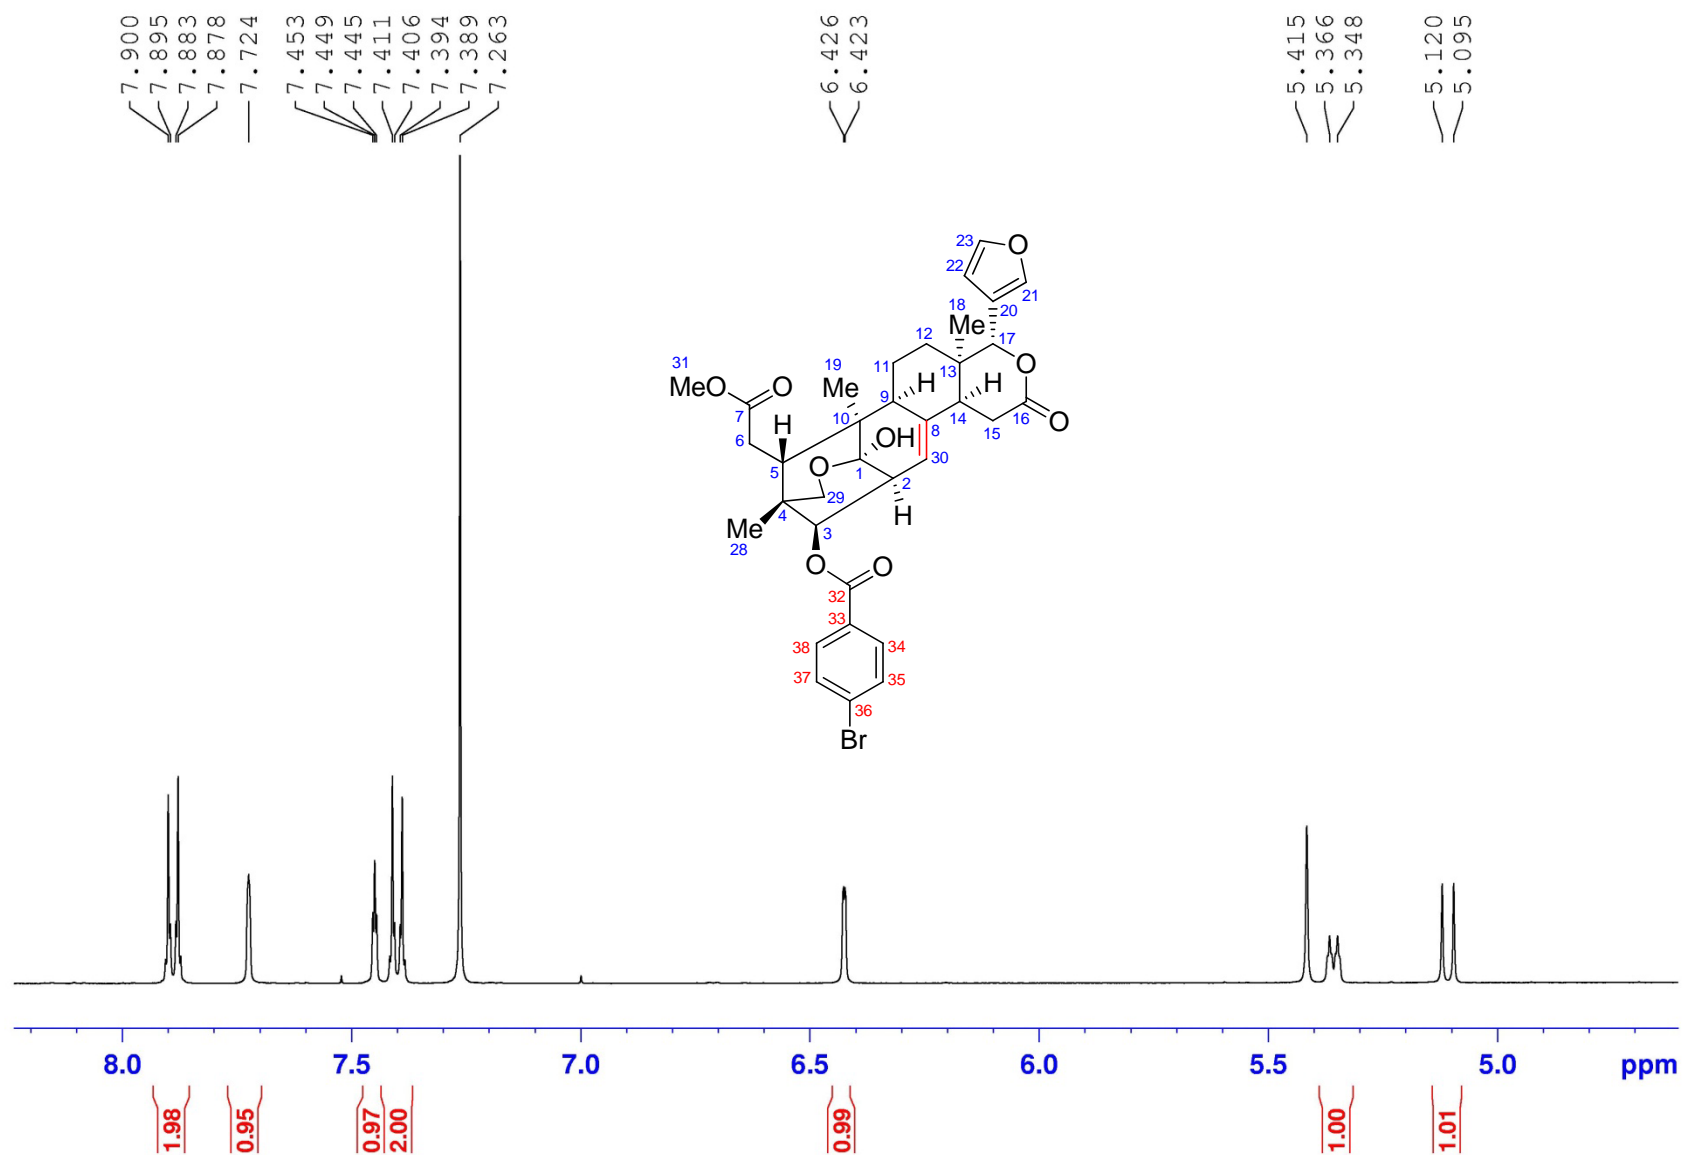

$^1\text{H}$  NMR (400 MHz) spectrum of **8b** in  $\text{CDCl}_3$

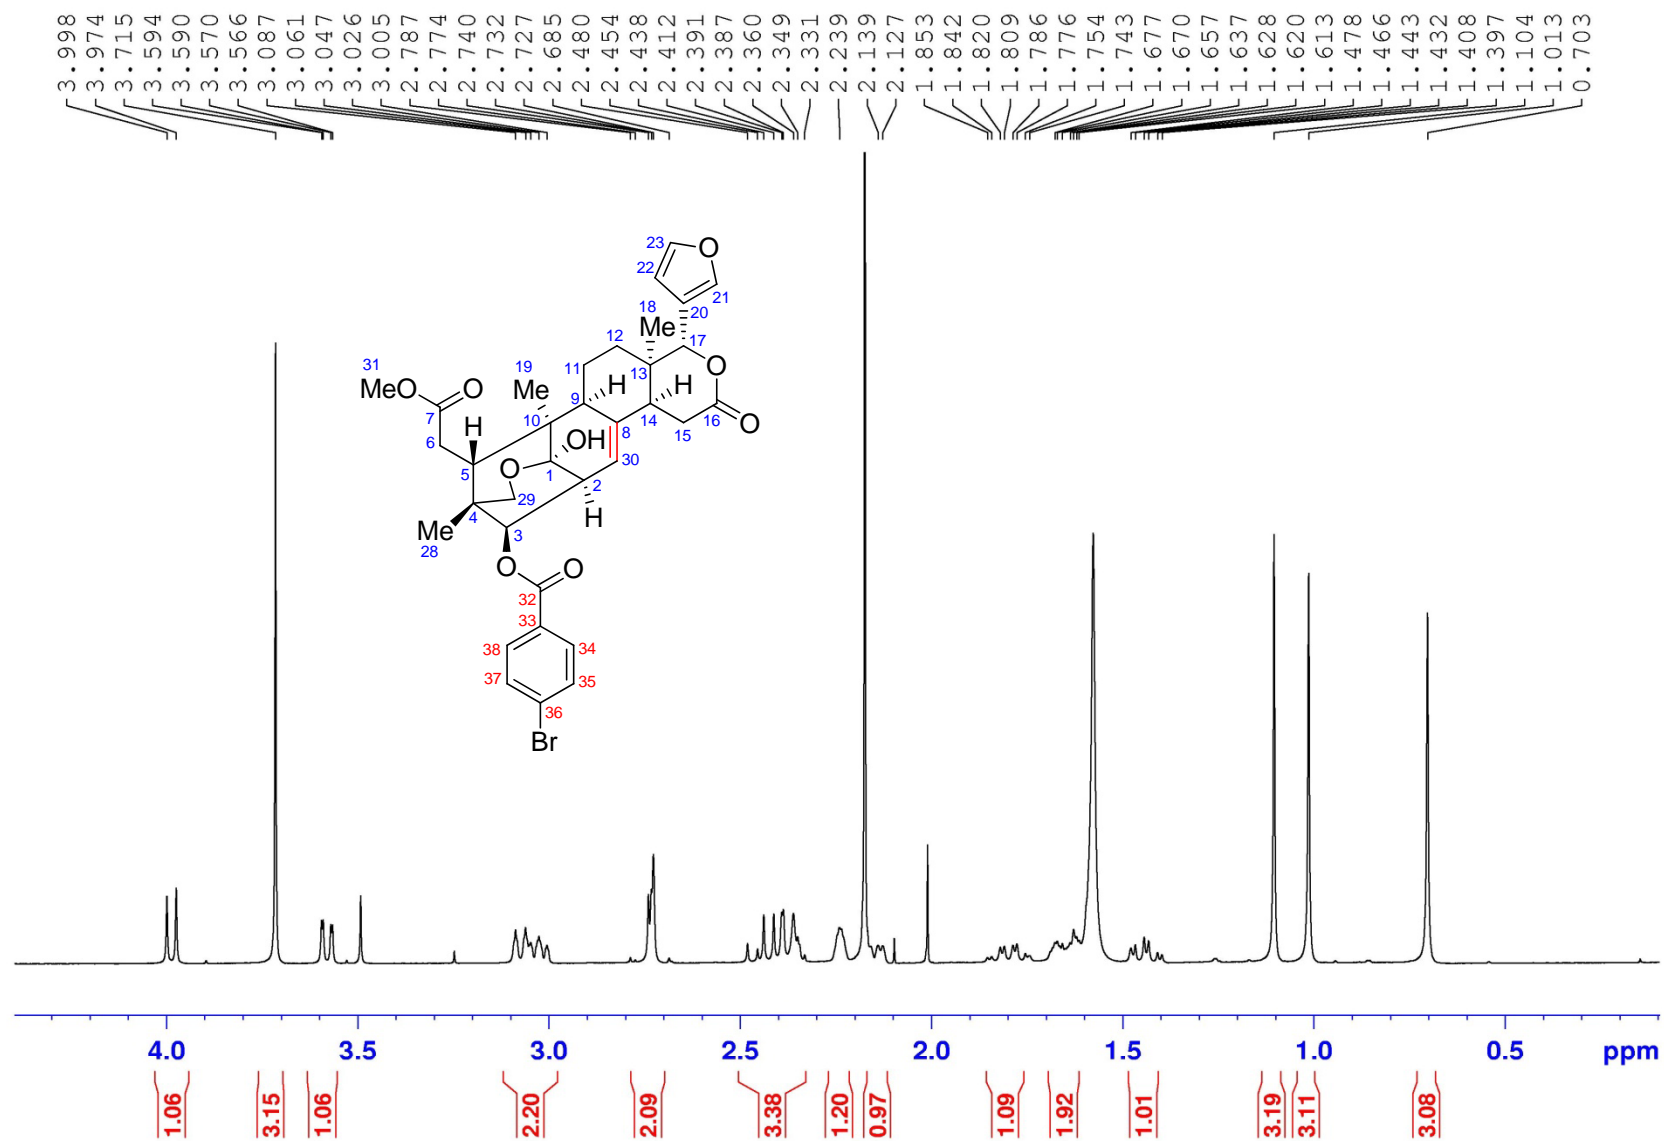

$^{13}\text{C}$  NMR (100 MHz) spectrum of **8b** in  $\text{CDCl}_3$

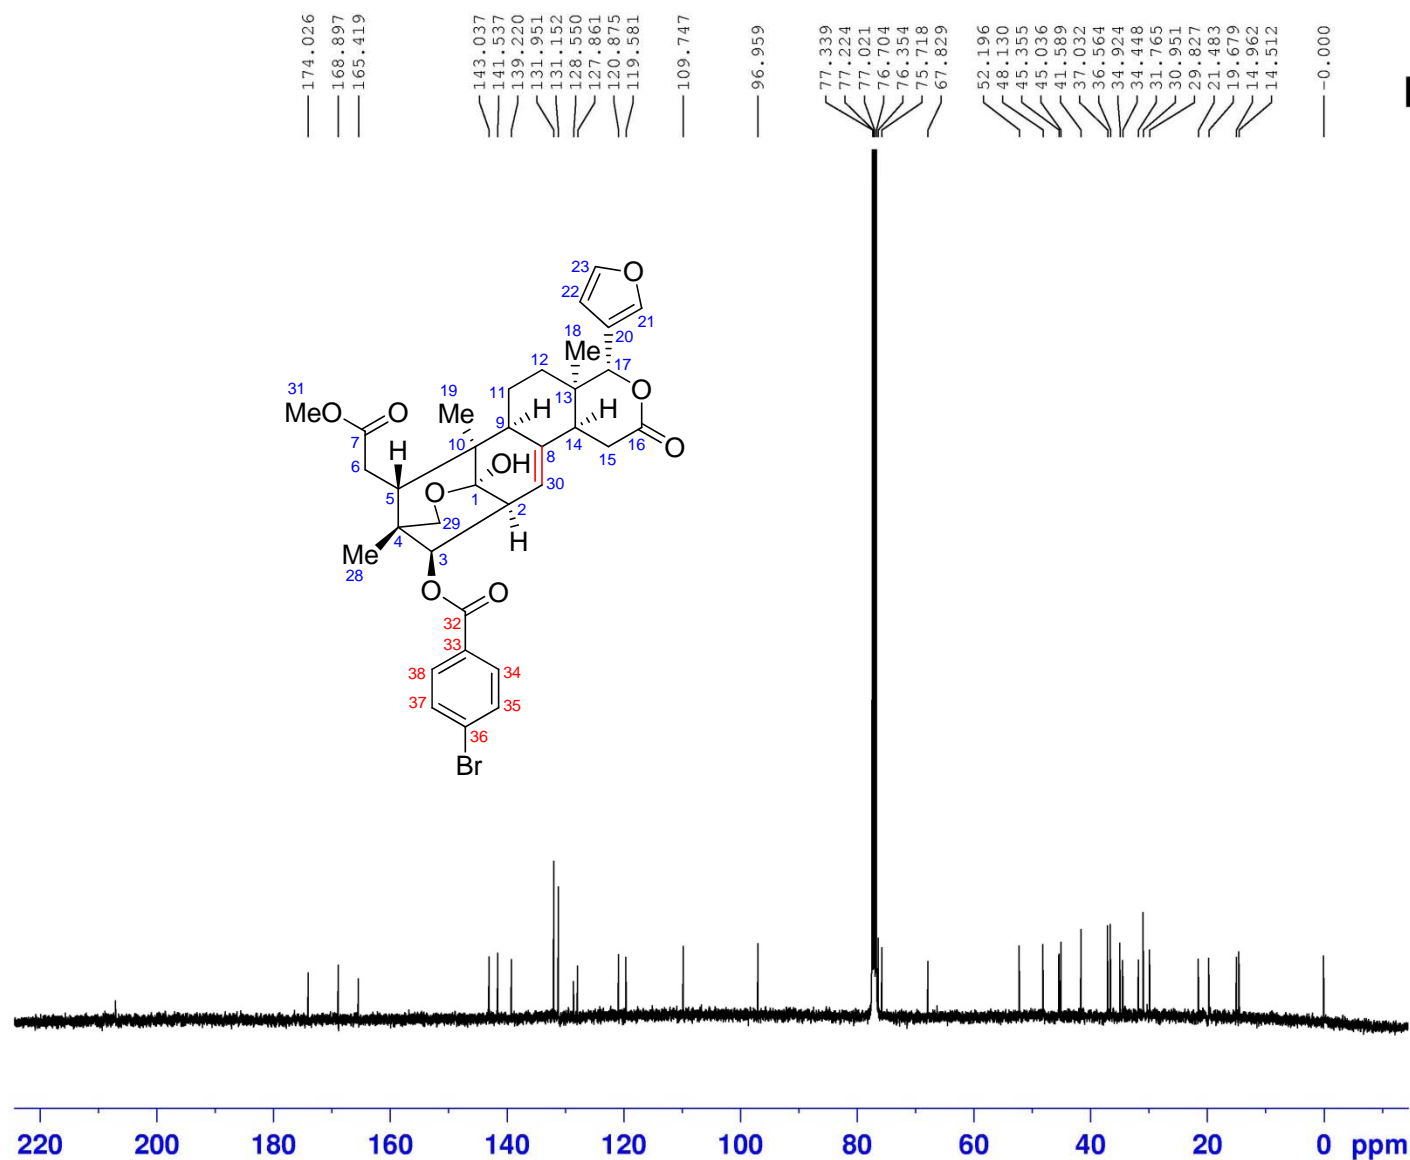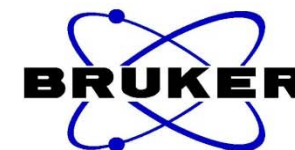

NAME czc-1-CH3-DUIXII  
 EXPNO 2  
 PROCNO 1  
 Date\_ 20171010  
 Time 0.13  
 INSTRUM spect  
 PROBHD 5 mm CPPBBO BB  
 PULPROG zgpg30  
 TD 65536  
 SOLVENT  $\text{CDCl}_3$   
 NS 1024  
 DS 4  
 SWH 24038.461 MHz  
 FIDRES 0.366798 MHz  
 AQ 1.3631988 s  
 RG 73.92  
 DW 20.800 us  
 DE 18.00 us  
 TE 297.0 K  
 D1 2.00000000 s  
 D11 0.03000000 s  
 TD0 1

===== CHANNEL f1 =====  
 SFO1 100.6233324 MHz  
 NUC1  $^{13}\text{C}$   
 P1 10.00 us  
 SI 32768  
 SF 100.6127690 MHz  
 WDW EM  
 SSB 0  
 LB 1.00 MHz  
 GB 0  
 PC 1.40

$^{13}\text{C}$  NMR (100 MHz) spectrum of **8b** in  $\text{CDCl}_3$

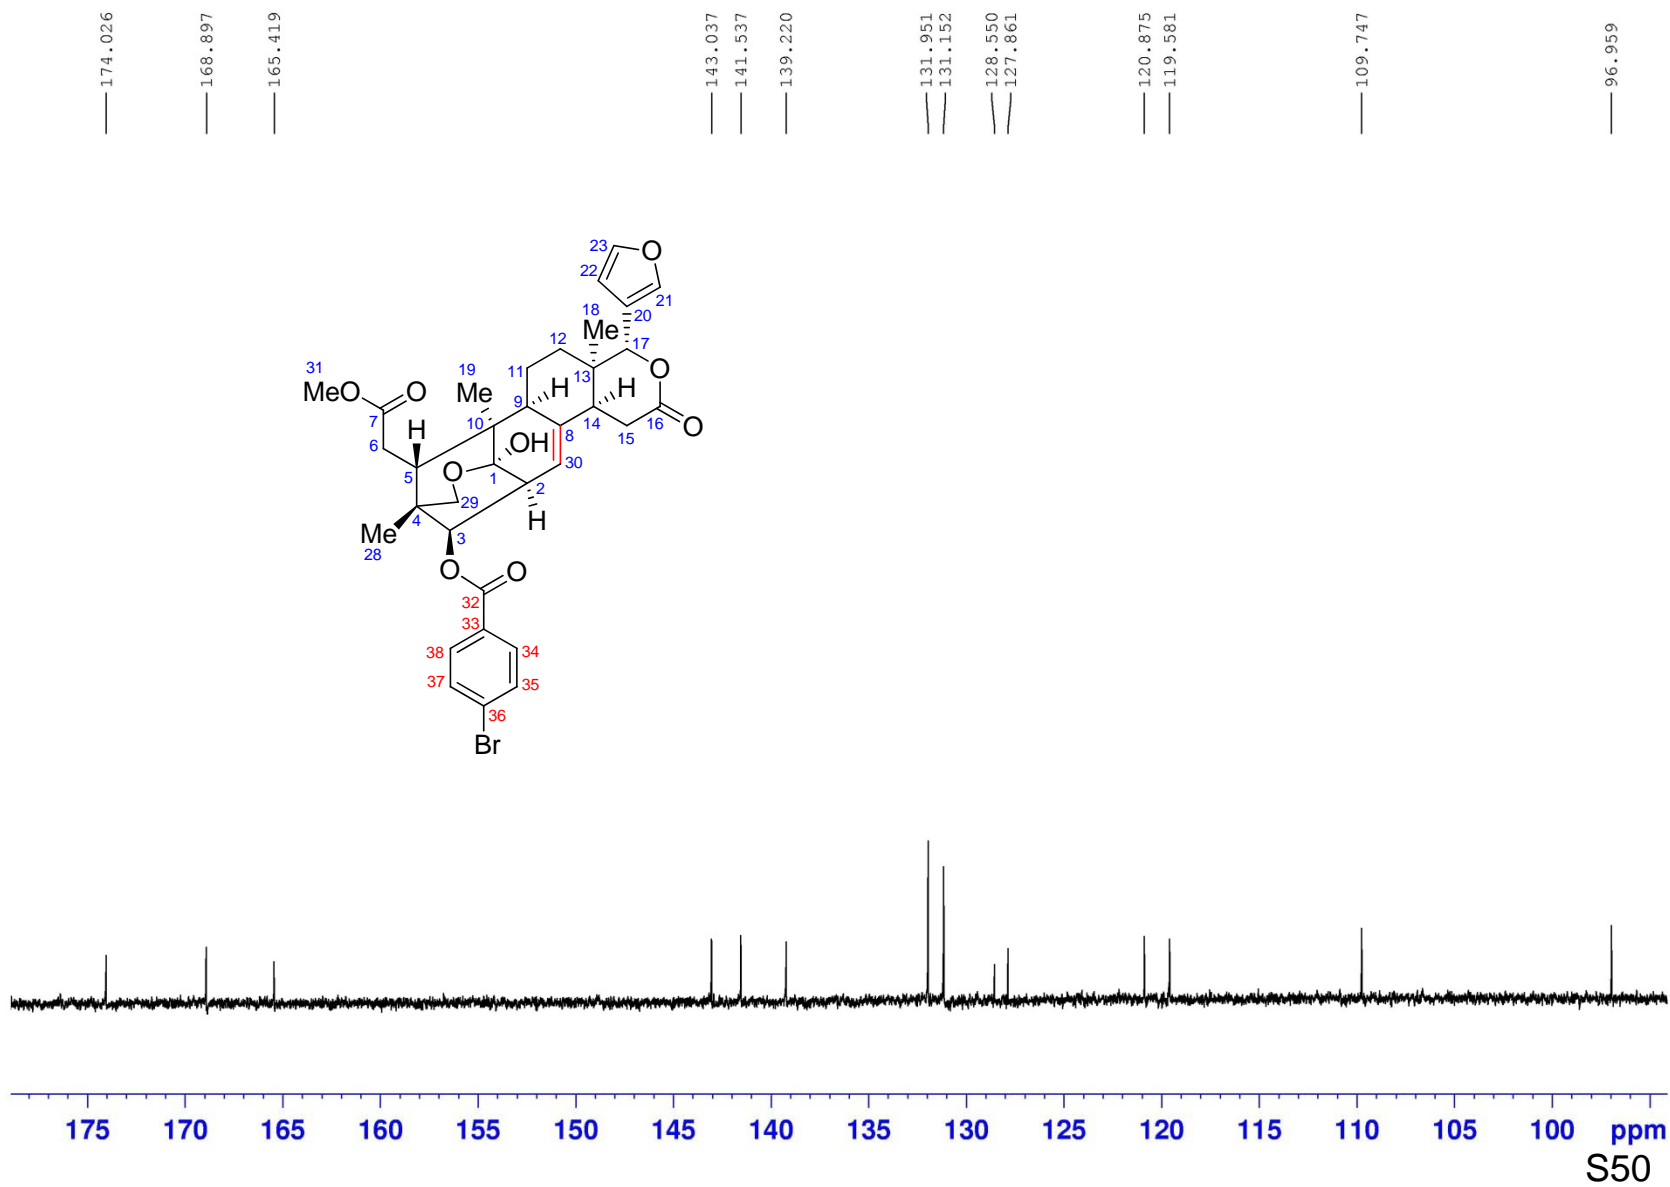



$^{13}\text{C}$  NMR (100 MHz) spectrum of **8b** in  $\text{CDCl}_3$

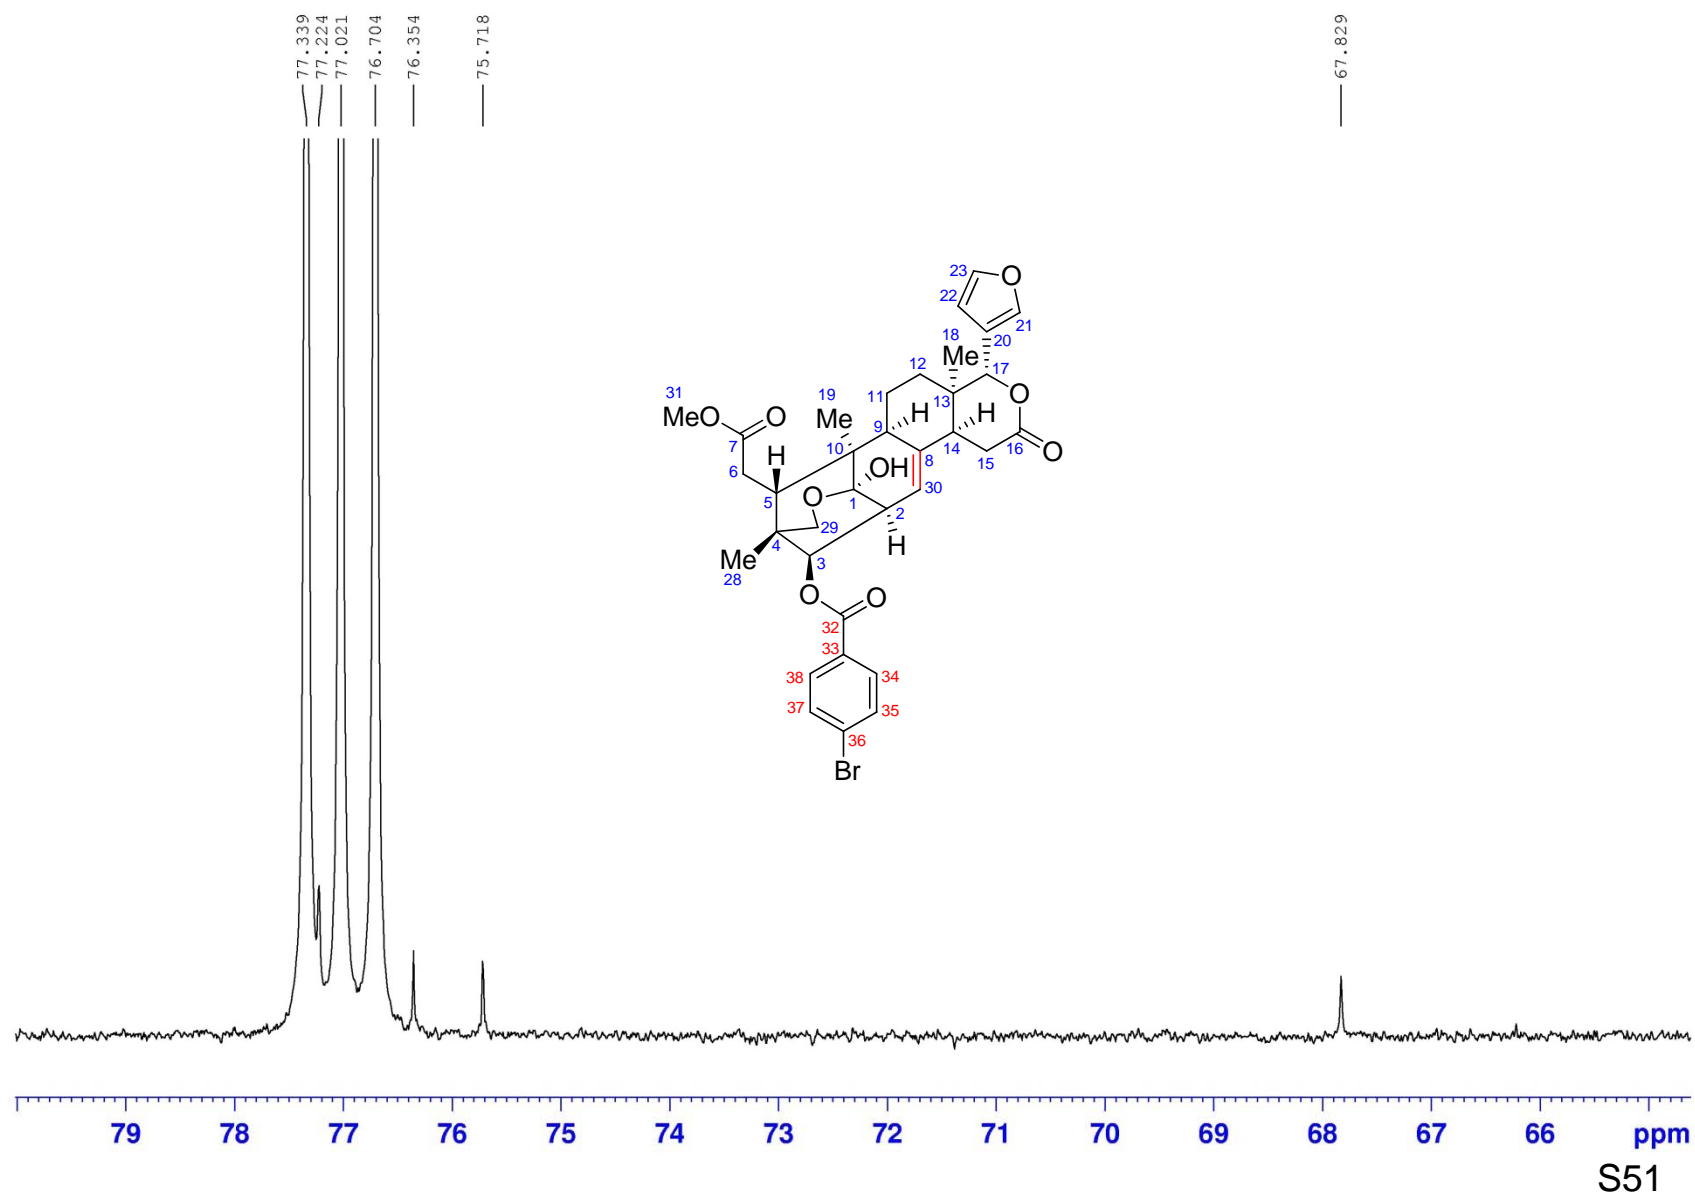

$^{13}\text{C}$  NMR (100 MHz) spectrum of **8b** in  $\text{CDCl}_3$

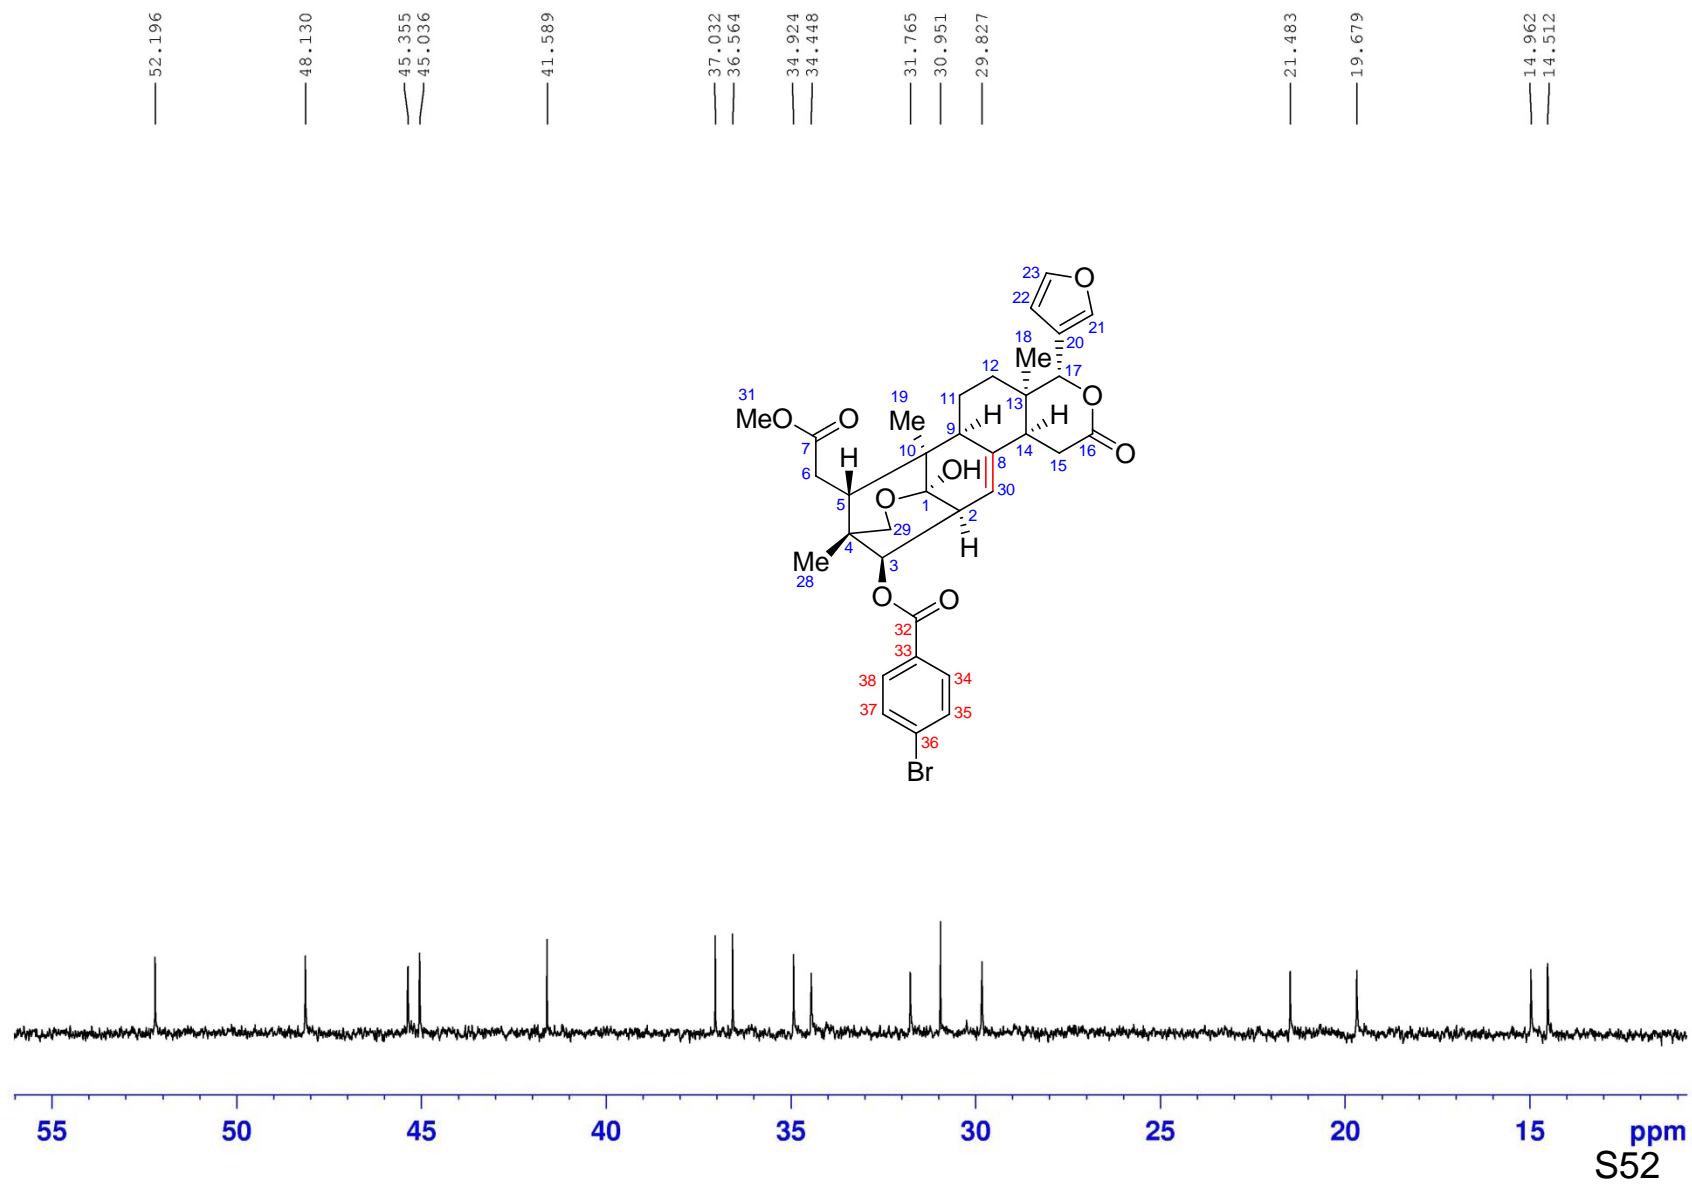

# DEPT 135 spectrum of **8b** in CDCl<sub>3</sub>

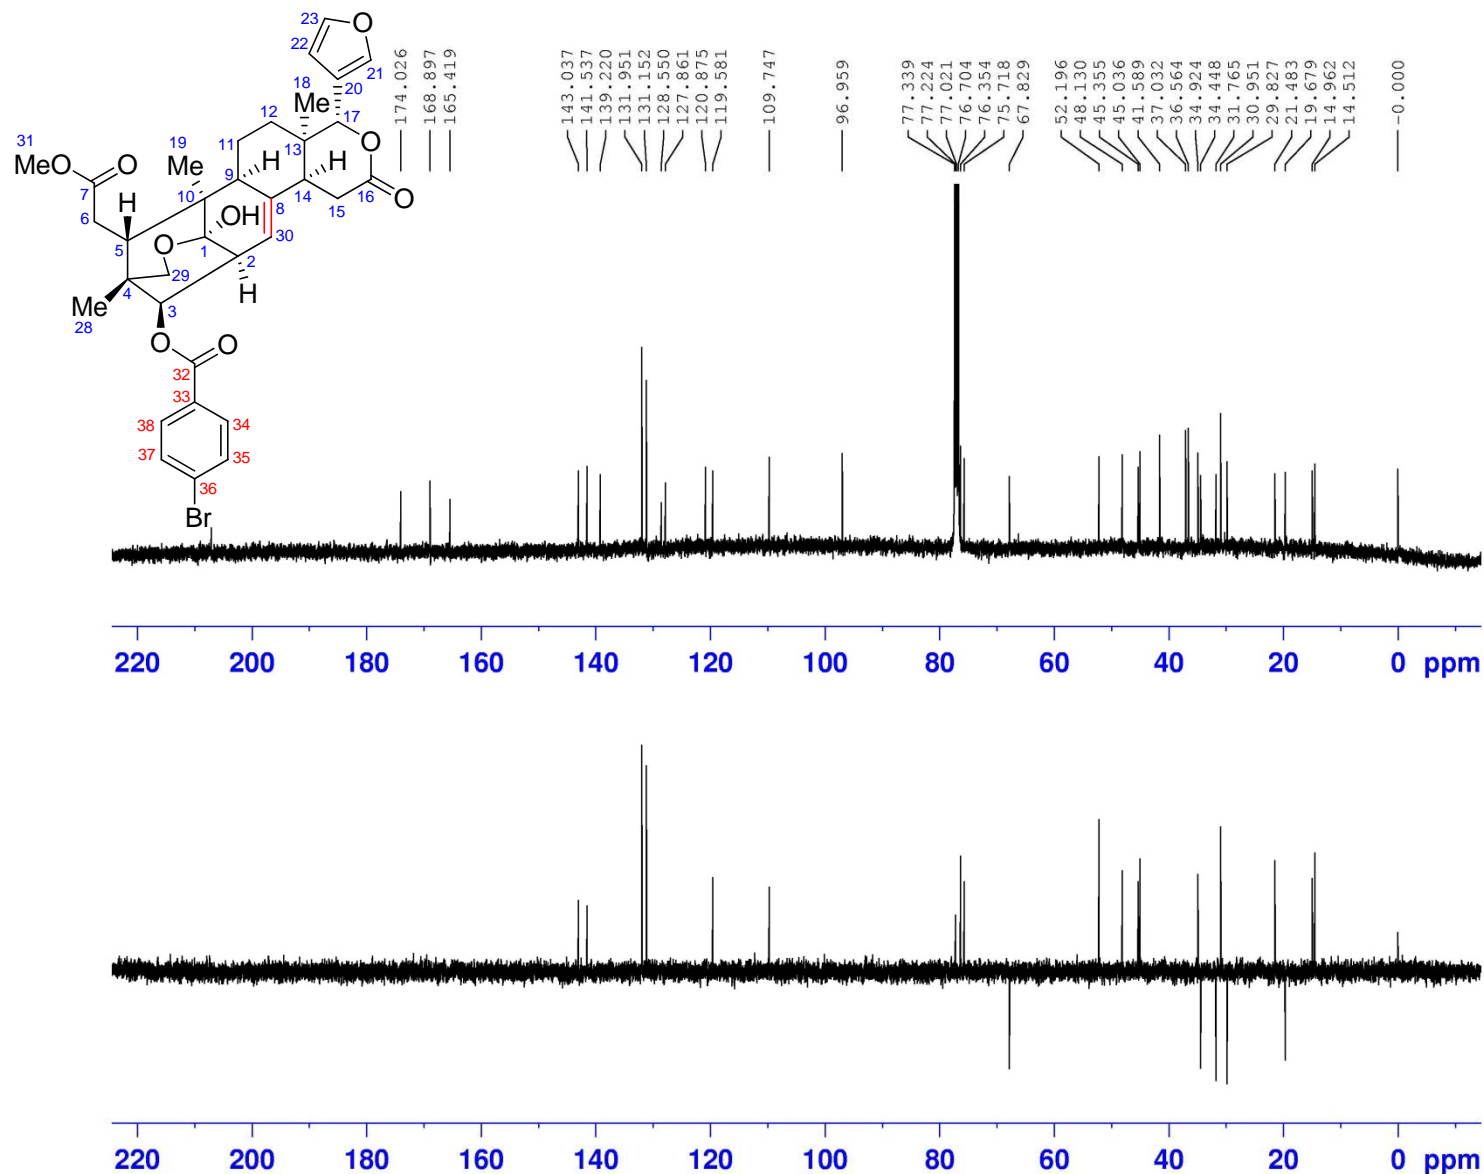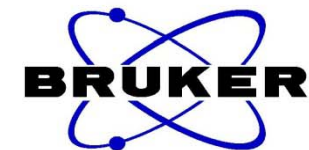

NAME czc-1-CH3-DUIXI  
 EXPNO 3  
 PROCNO 1  
 Date\_ 20171010  
 Time 0.31  
 INSTRUM spect  
 PROBHD 5 mm CPPBBO BB  
 PULPROG deptsp135  
 TD 65536  
 SOLVENT CDCl3  
 NS 300  
 DS 4  
 SWH 24038.461  
 FIDRES 0.366798  
 AQ 1.3631988  
 RG 130.26  
 DW 20.800  
 DE 18.00  
 TE 297.0  
 CNST2 145.0000000  
 D1 2.00000000  
 D2 0.00344828  
 D12 0.00002000  
 TD0 1

===== CHANNEL f1 =====  
 SFO1 100.6233324  
 NUC1 13C  
 P1 10.00  
 P13 2000.00  
 SI 32768  
 SF 100.6127693  
 WDW EM  
 SSB 0  
 LB 1.00  
 GB 0  
 PC 1.40

# DEPT 135 spectrum of **8b** in CDCl<sub>3</sub>

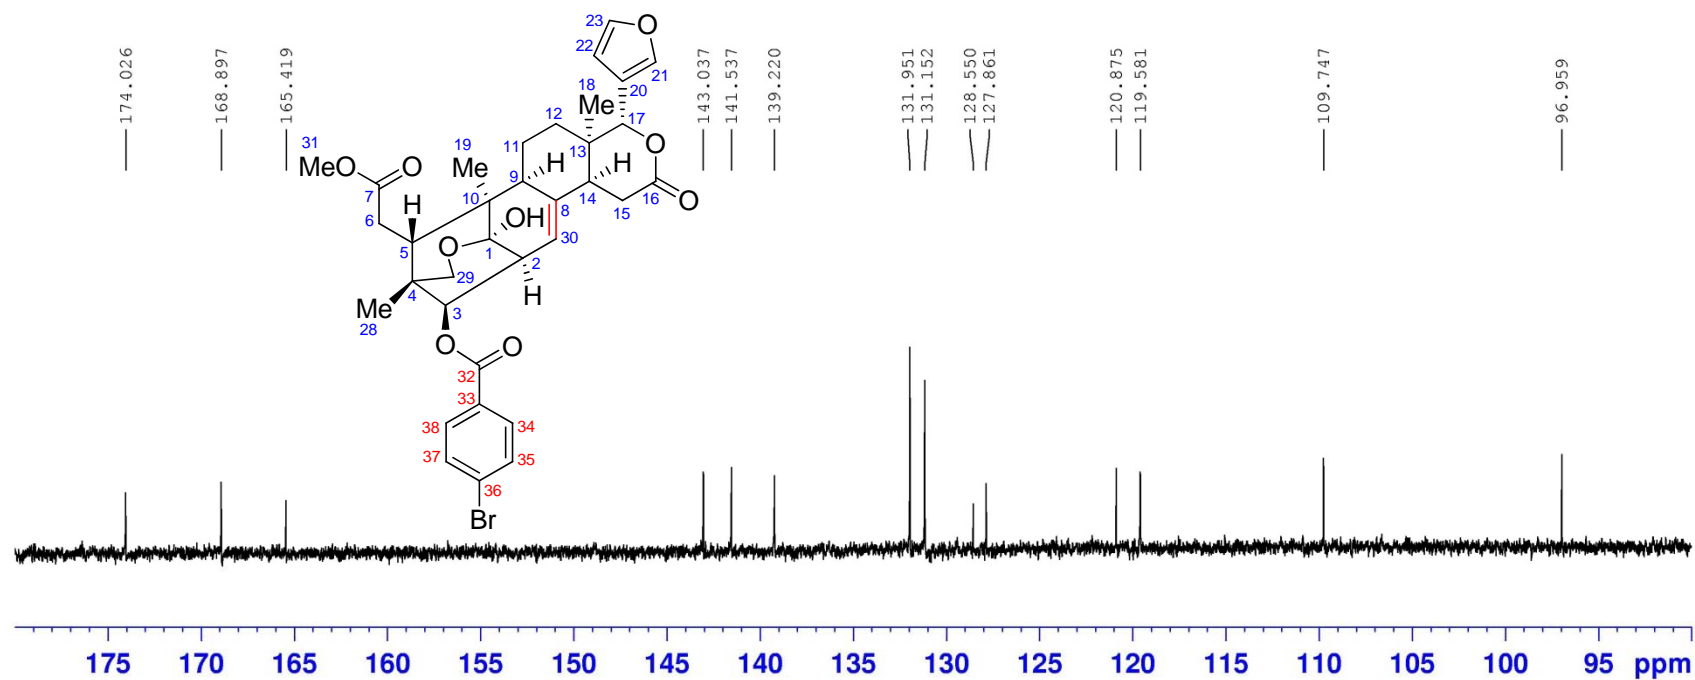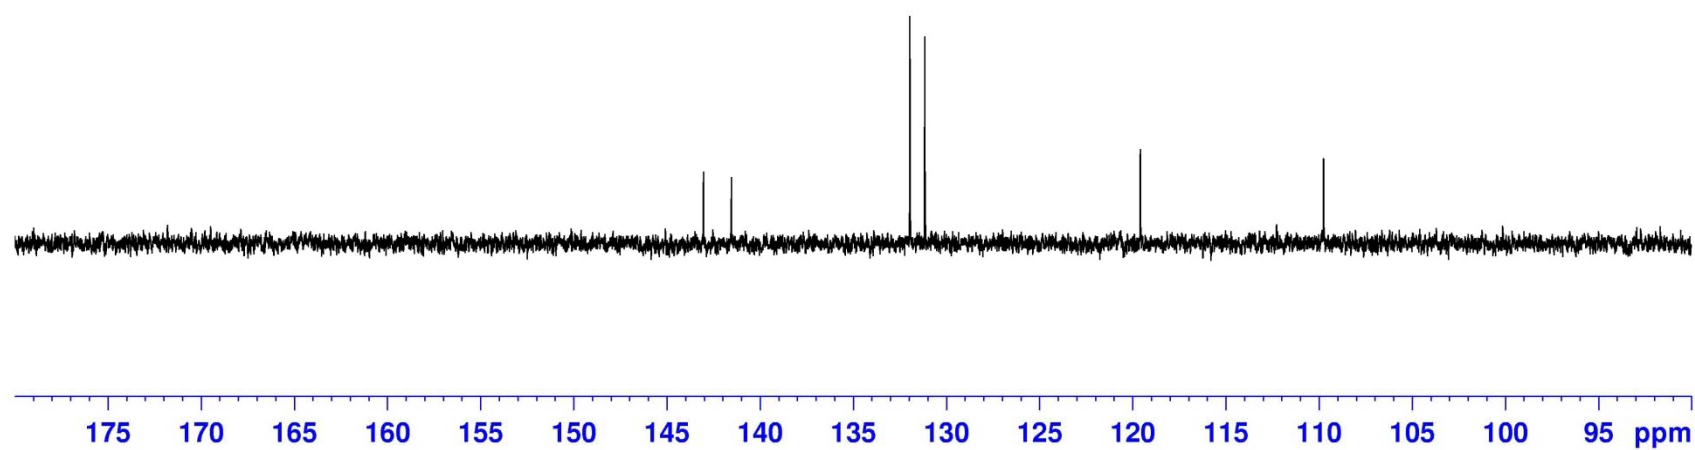

DEPT 135 spectrum of **8b** in CDCl<sub>3</sub>

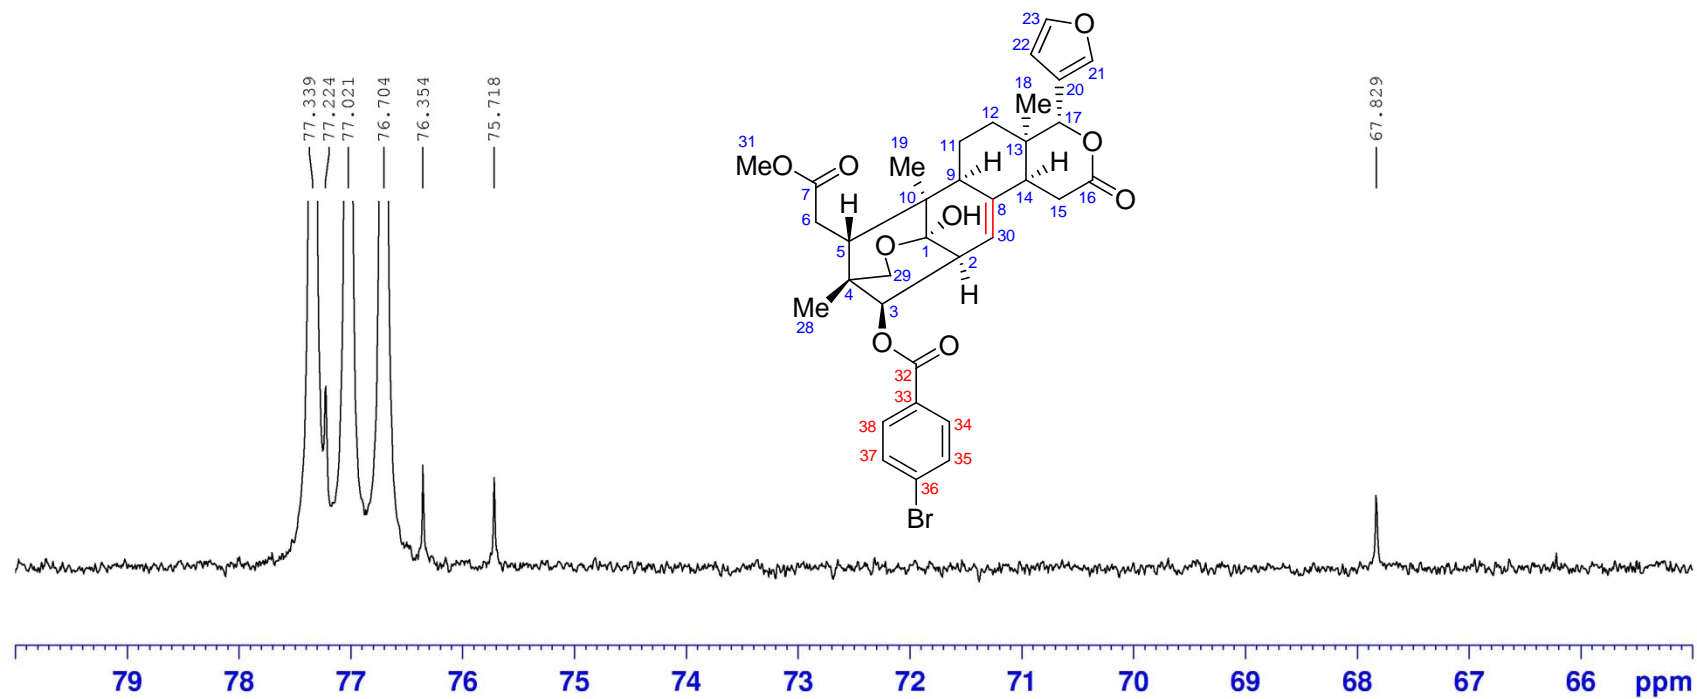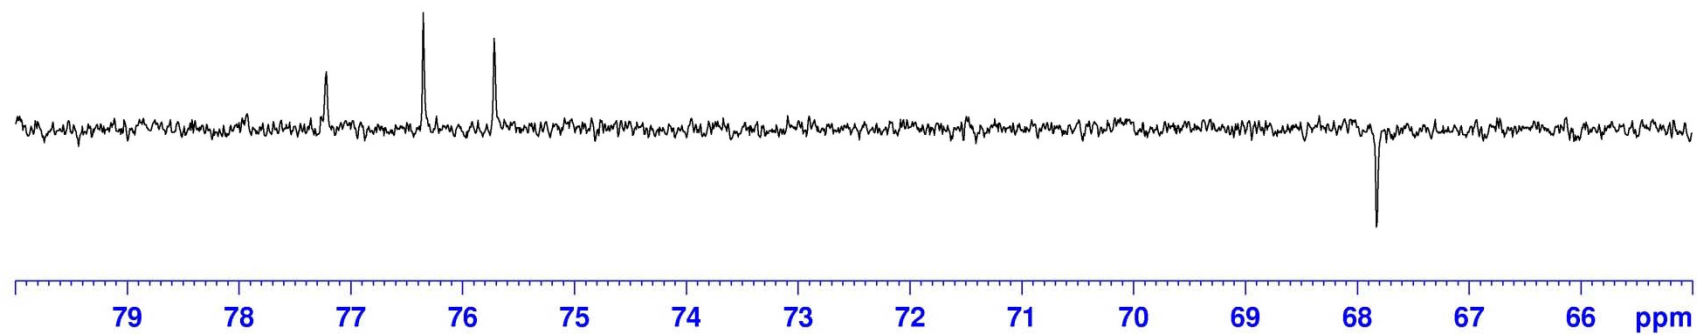

DEPT 135 spectrum of **8b** in CDCl<sub>3</sub>

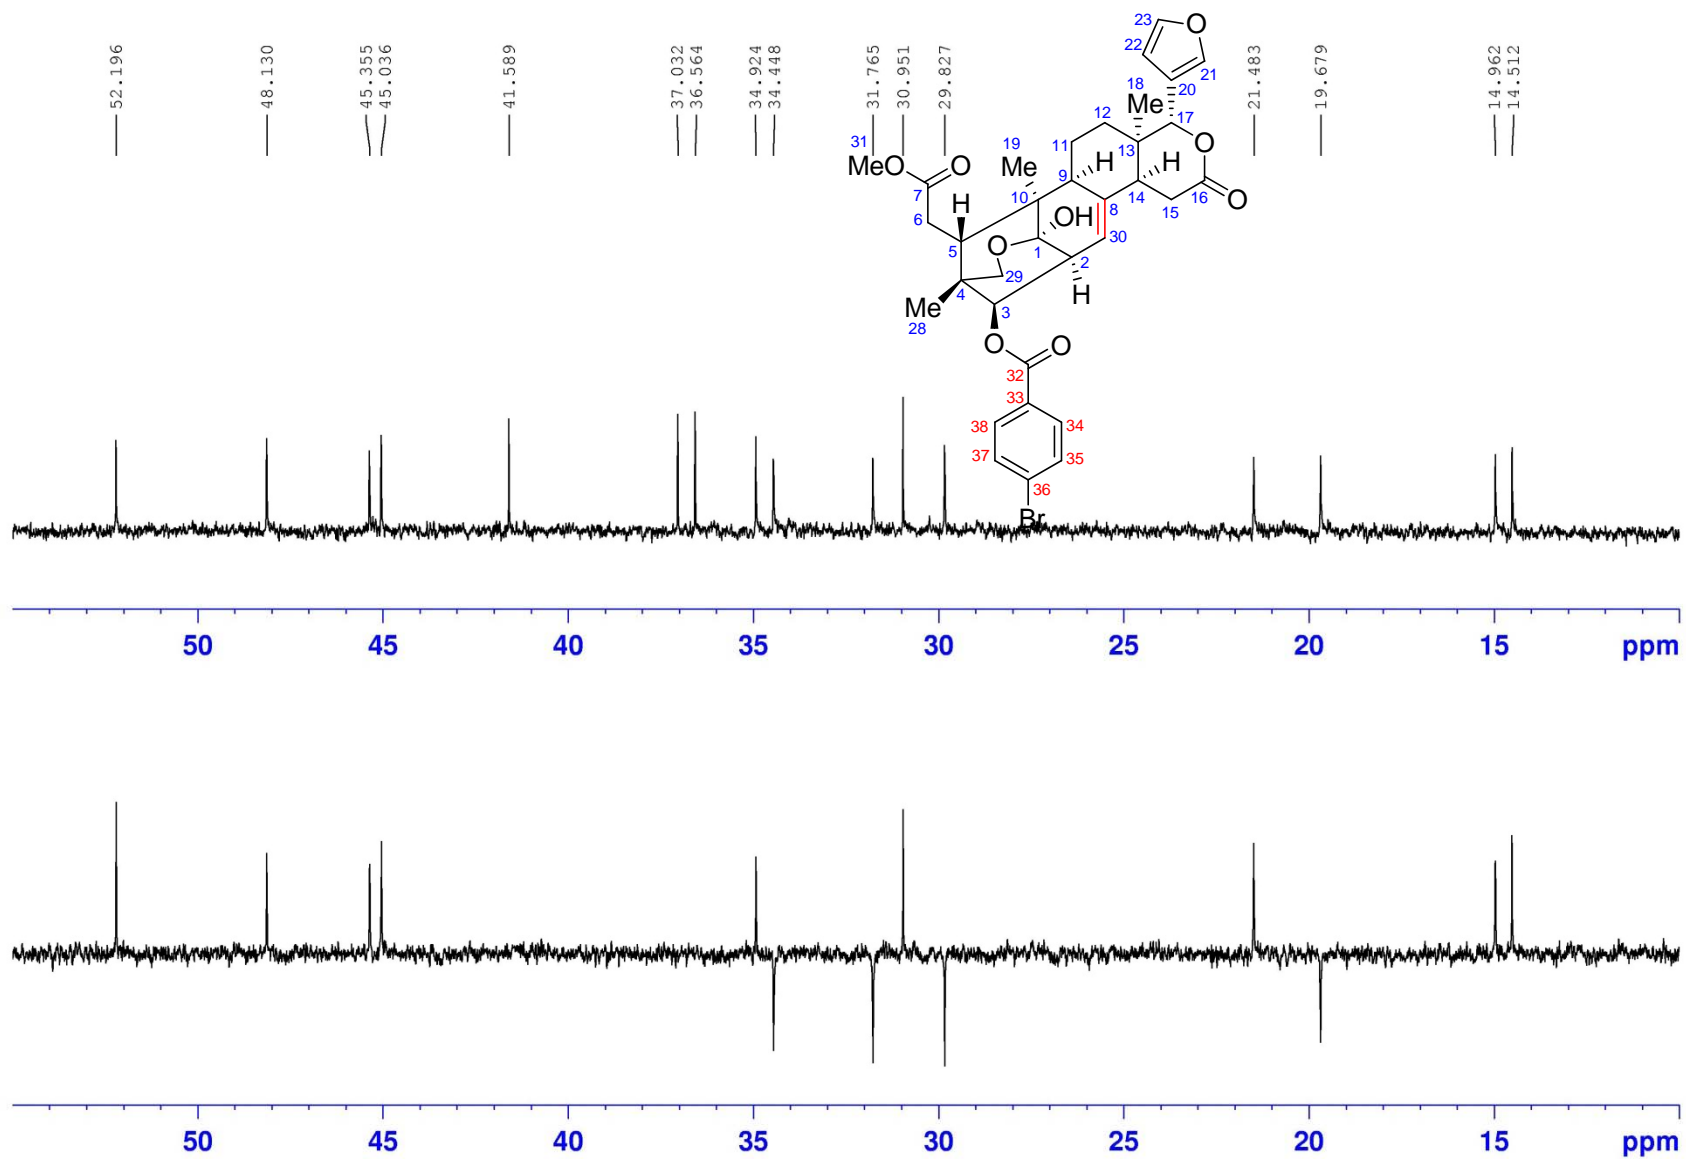

# LR-ESIMS for compound **8c**

## Generic Display Report

|                                                                              |                                |                                   |
|------------------------------------------------------------------------------|--------------------------------|-----------------------------------|
| Analysis Info                                                                |                                | Acquisition D 2017/10/20 10:48:50 |
| Analysis Name H:\Data-MS-20180909\liwanshan\CZC-1-CH3 4-F ben yang yi suan.d |                                |                                   |
| Method                                                                       | DEF_MS.M                       | Operator bdal                     |
| Sample Name                                                                  | CZC-1-CH3 4-F ben yang yi suan | Instrument amaZon SL              |
| Comment                                                                      |                                |                                   |

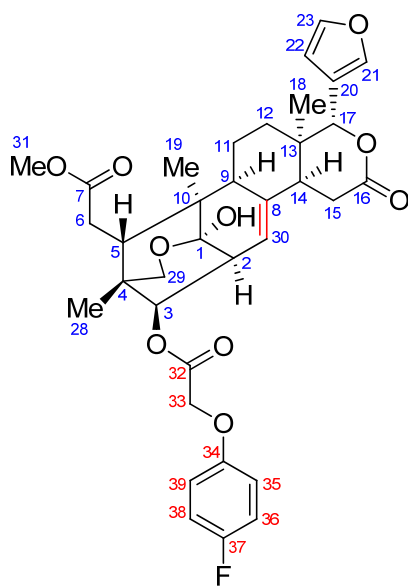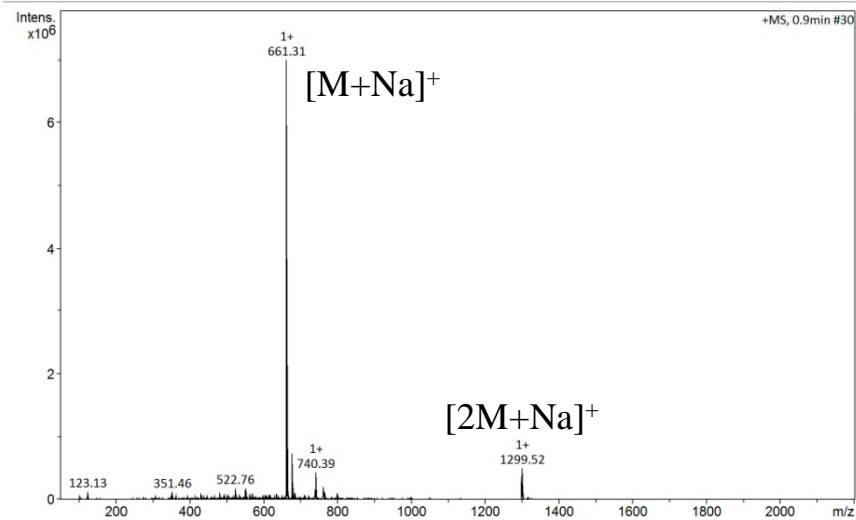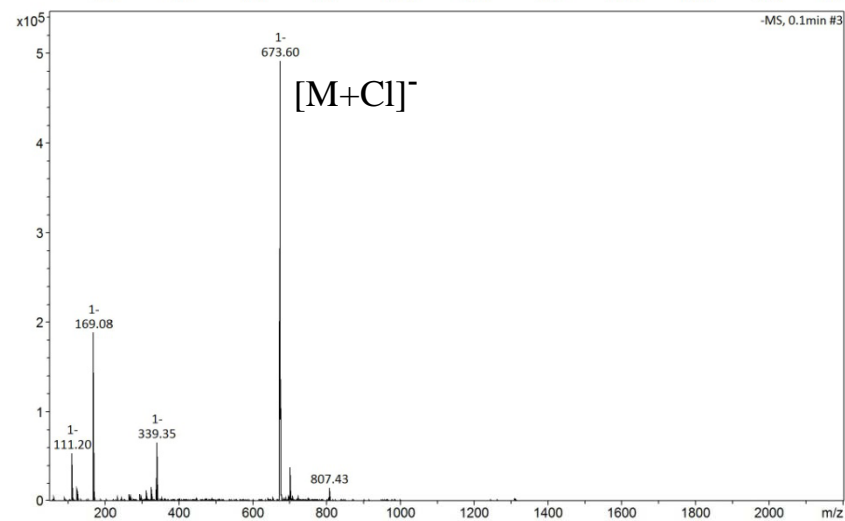

Bruker Compass DataAnalysis

$^1\text{H}$  NMR (400 MHz) spectrum of **8c** in  $\text{CDCl}_3$

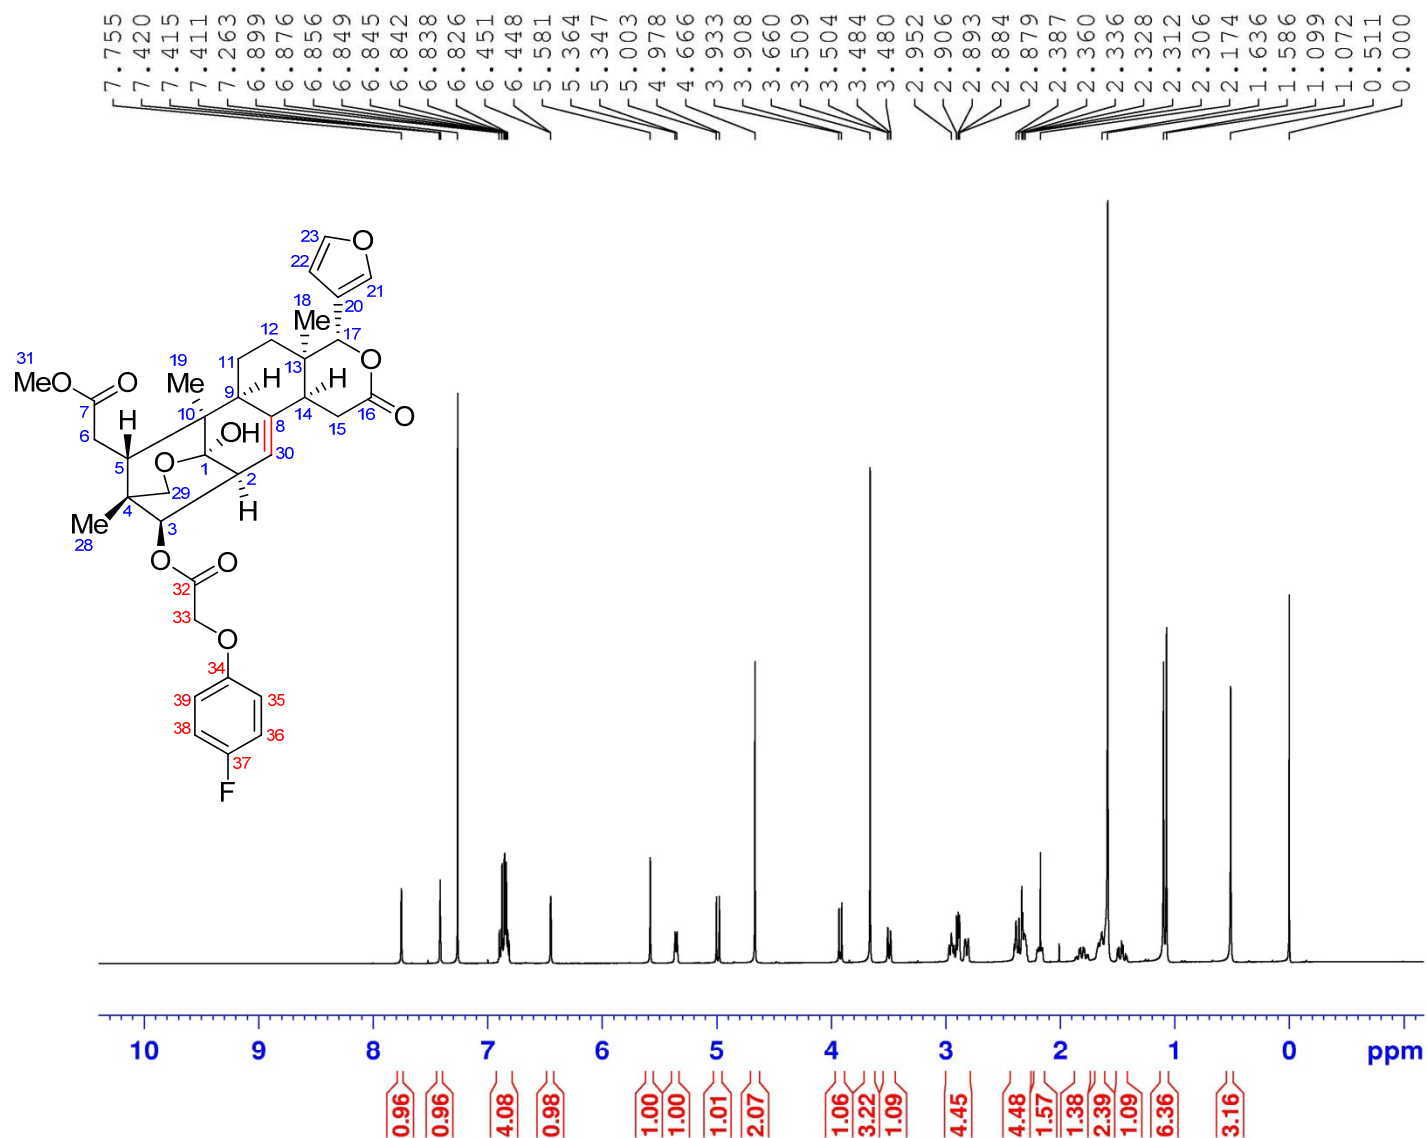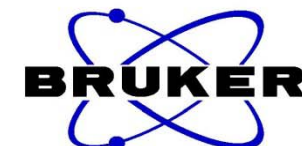

```

NAME      czc-1-CH3-4-F-YISU
EXPNO     1
PROCNO    1
Date_     20171017
Time      14.25
INSTRUM   spect
PROBHD    5 mm CPPBBO BB
PULPROG   zg30
TD        65536
SOLVENT   CDCl3
NS         16
DS         2
SWH        8223.685 Hz
FIDRES     0.125483 Hz
AQ         3.9846387 sec
RG         208.5
DW         60.800 usec
DE         10.00 usec
TE         297.0 K
D1         1.00000000 sec
TD0        1
  
```

```

===== CHANNEL f1 =====
SFO1      400.1324710 MHz
NUC1       1H
P1         11.50 usec
SI         65536
SF         400.1300084 MHz
WDW        EM
SSB        0
LB         0.30 Hz
GB         0
PC         1.00
  
```



$^1\text{H}$  NMR (400 MHz) spectrum of **8c** in  $\text{CDCl}_3$

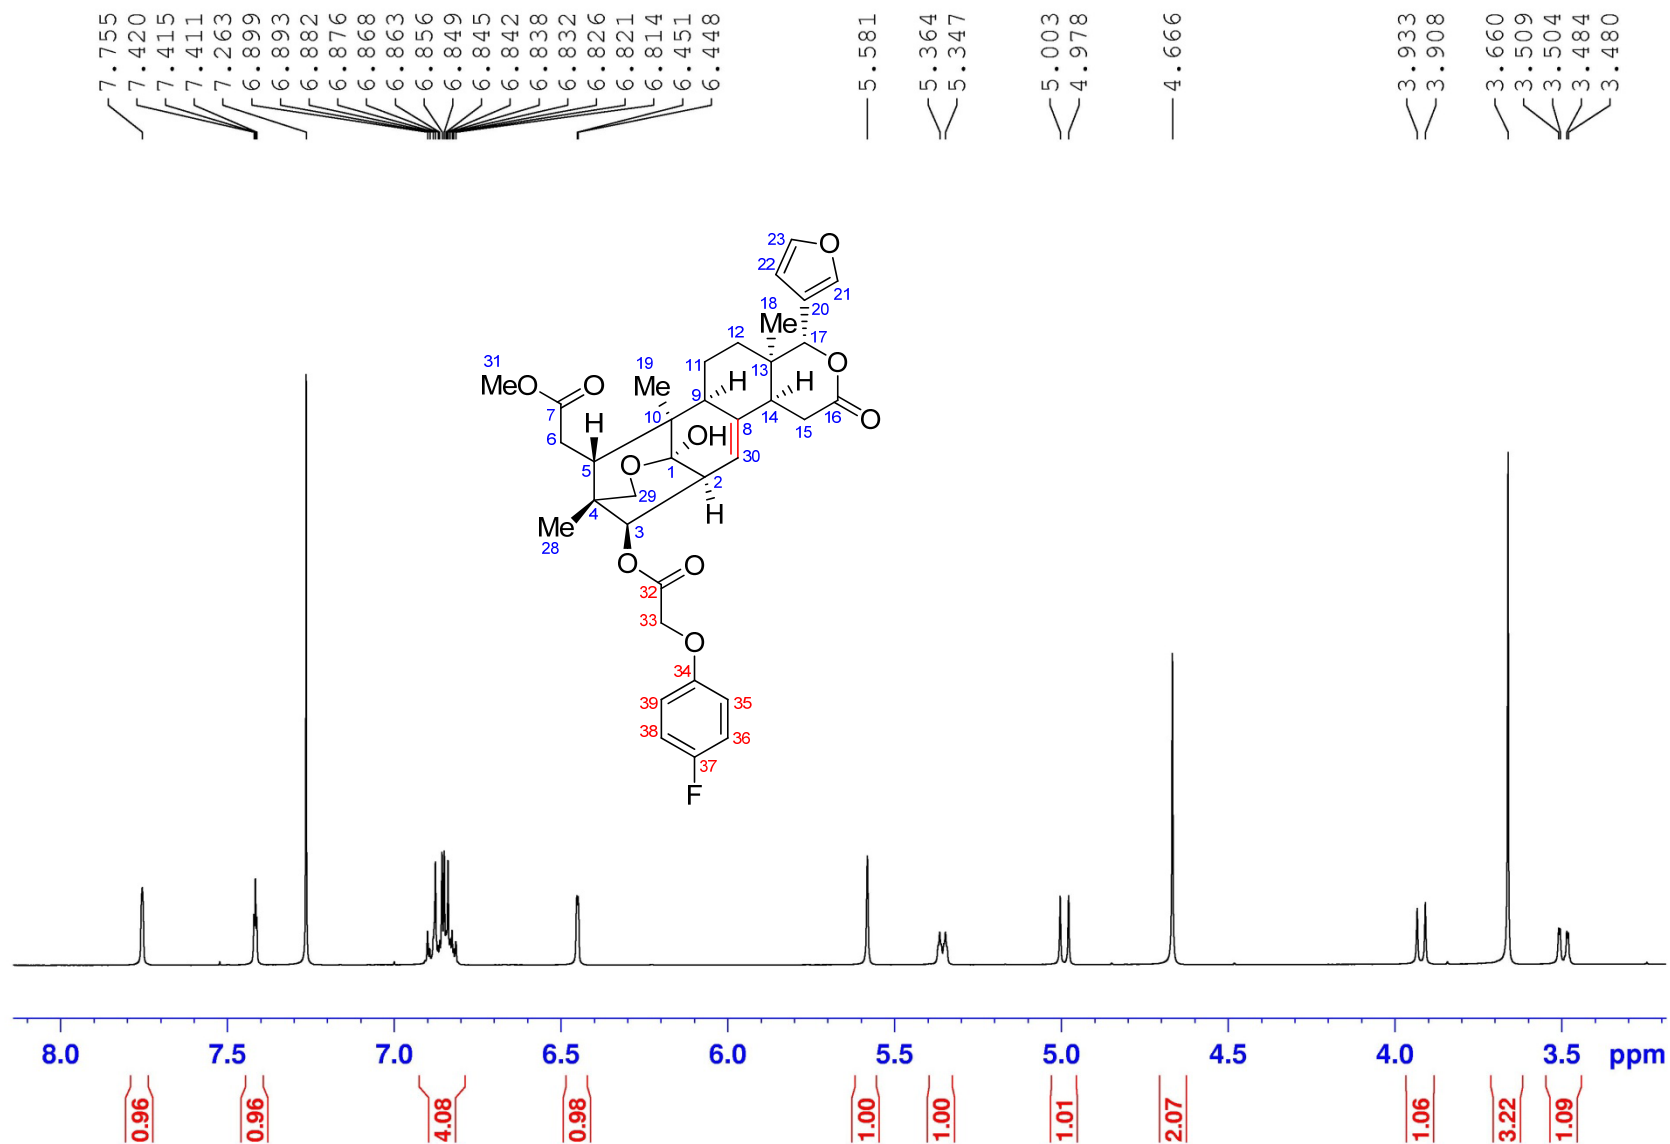

$^1\text{H}$  NMR (400 MHz) spectrum of **8c** in  $\text{CDCl}_3$

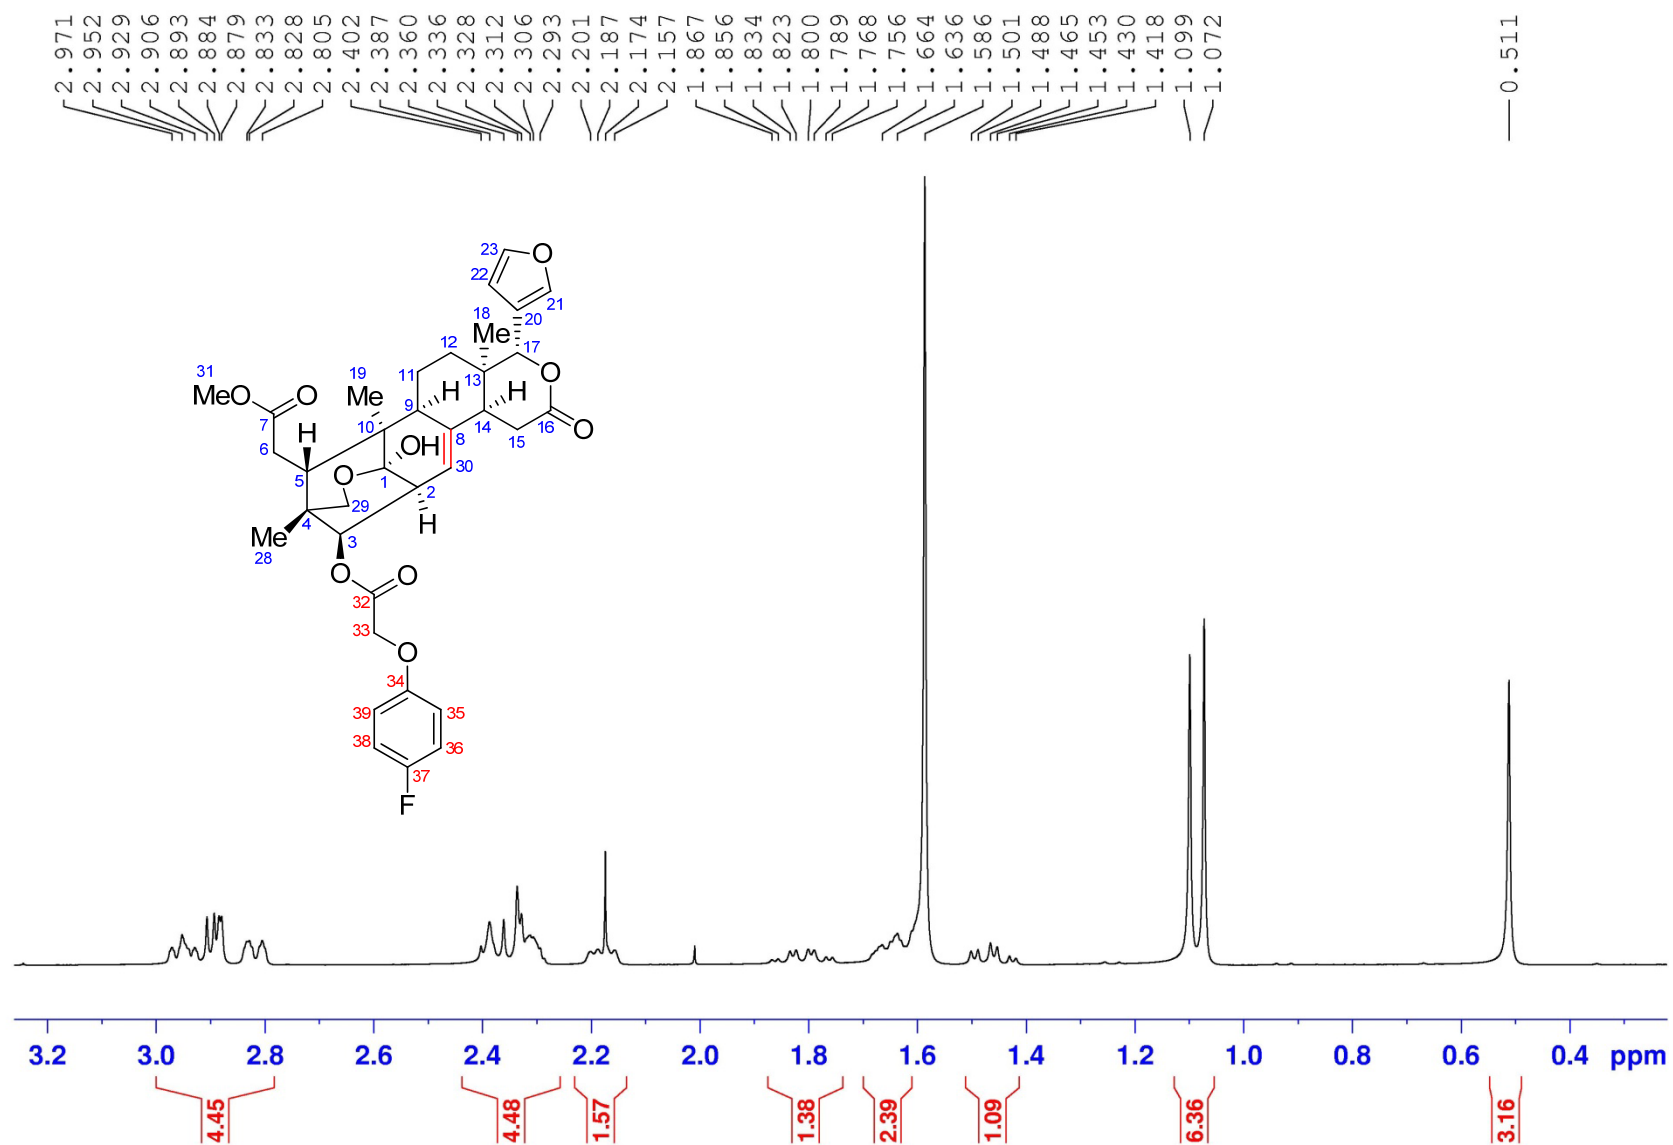

# $^{13}\text{C}$ NMR (100 MHz) spectrum of **8c** in $\text{CDCl}_3$

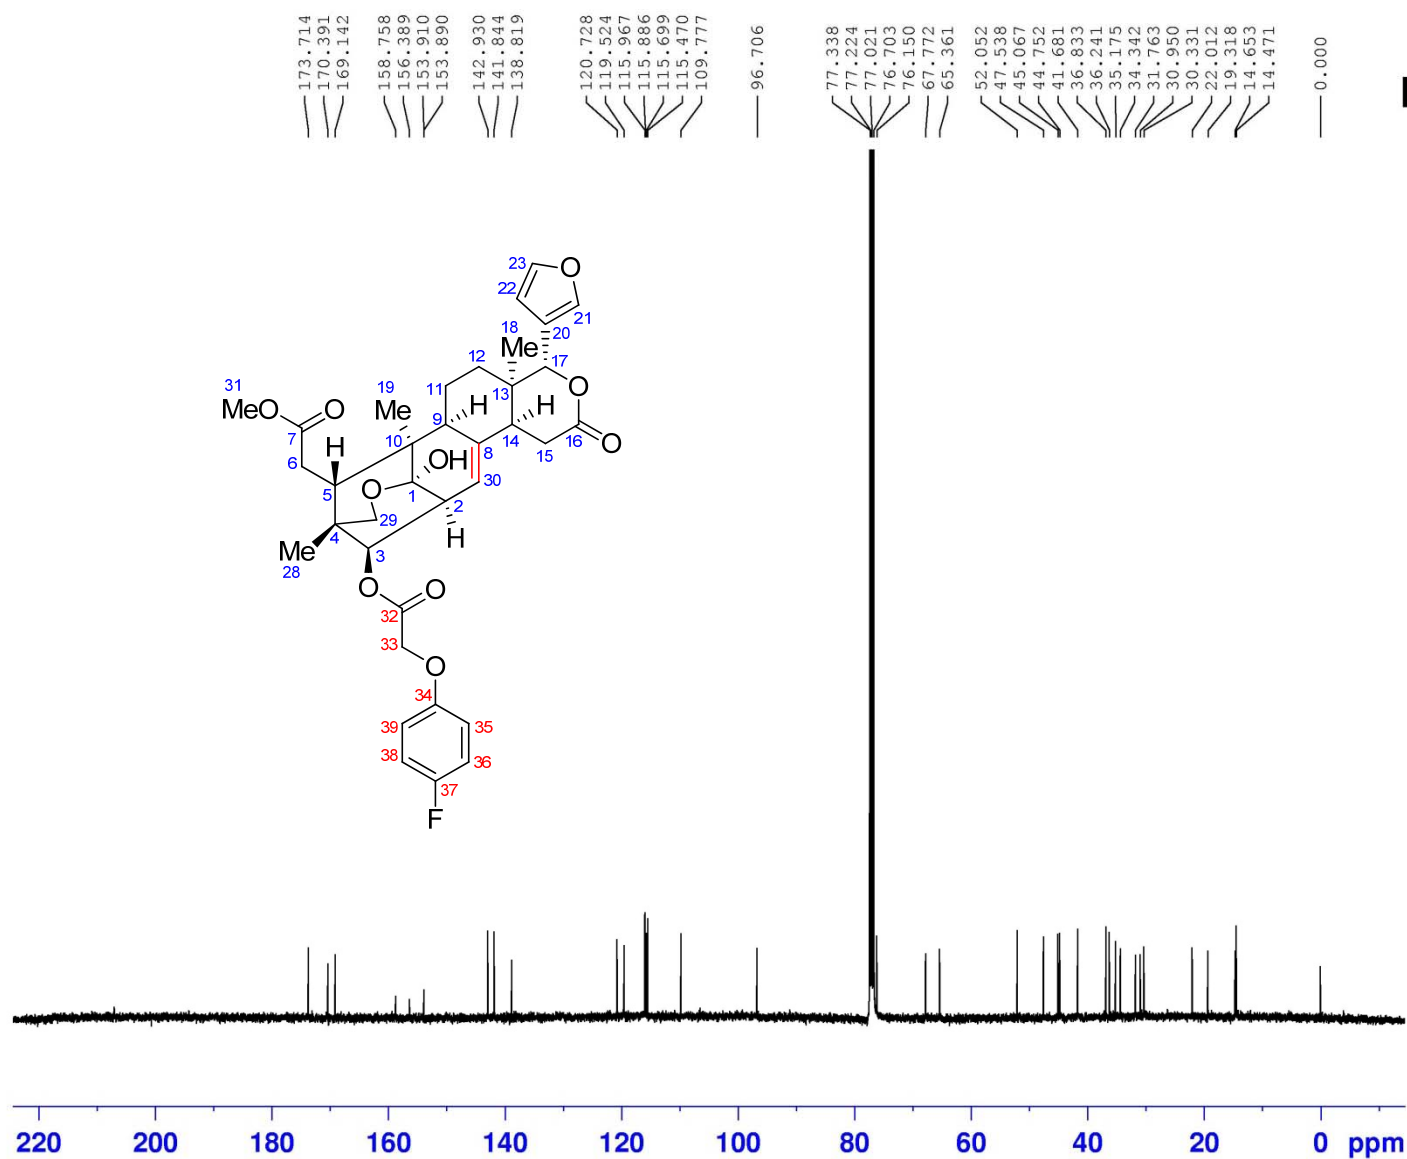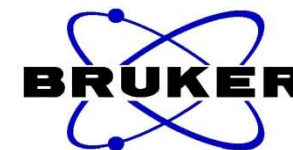

```

NAME      czc-1-CH3-4-F-BENYANGY.
EXPNO     2
PROCNO    1
Date_     20171010
Time      1.35
INSTRUM   spect
PROBHD    5 mm CPBPBBO BB
PULPROG   zgpg30
TD        65536
SOLVENT   CDCl3
NS        1024
DS        4
SWH       24038.461 Hz
FIDRES    0.366798 Hz
AQ        1.3631988 sec
RG        147.94
DW        20.800 usec
DE        18.00 usec
TE        297.0 K
D1        2.00000000 sec
D11       0.03000000 sec
TD0       1

===== CHANNEL f1 =====
SFO1     100.6233324 MHz
NUC1     13C
P1       10.00 usec
SI       32768
SF       100.6127691 MHz
WDW      EM
SSB      0
LB       1.00 Hz
GB       0
PC       1.40
    
```

$^{13}\text{C}$  NMR (100 MHz) spectrum of **8c** in  $\text{CDCl}_3$

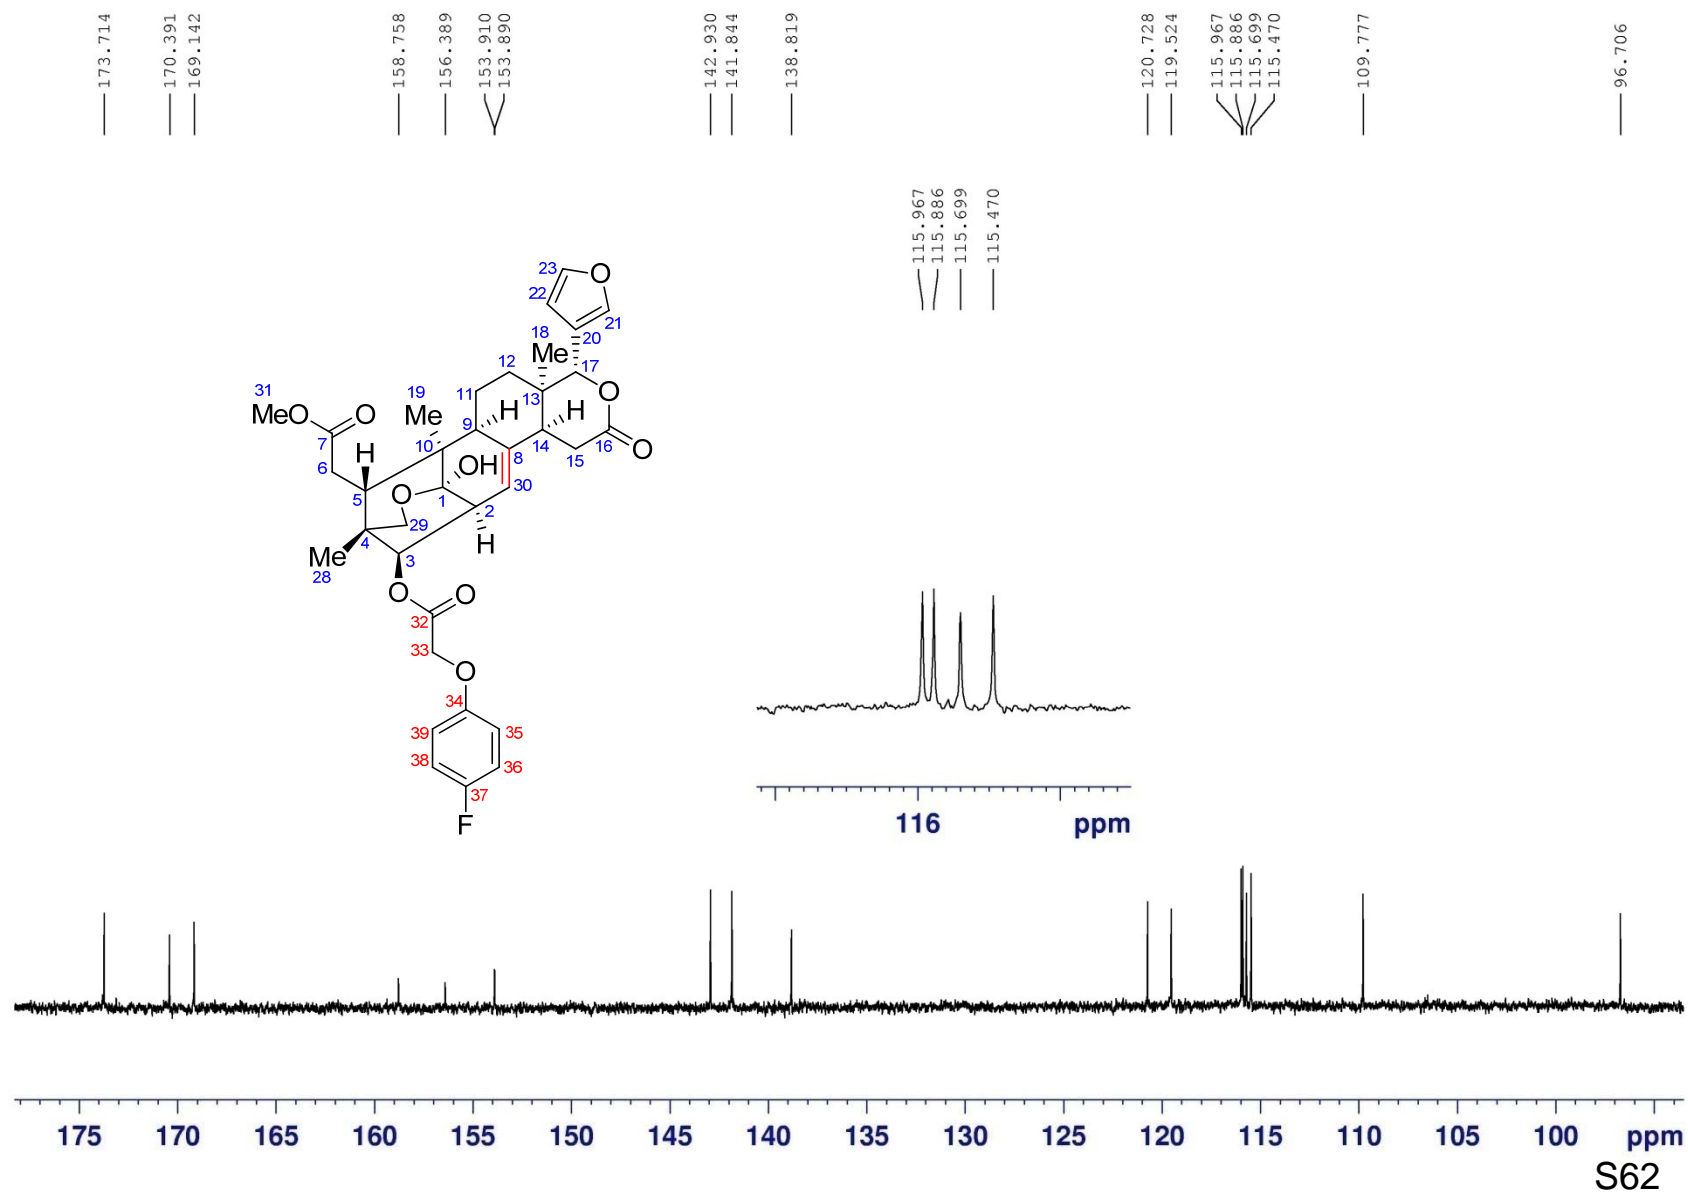

$^{13}\text{C}$  NMR (100 MHz) spectrum of **8c** in  $\text{CDCl}_3$

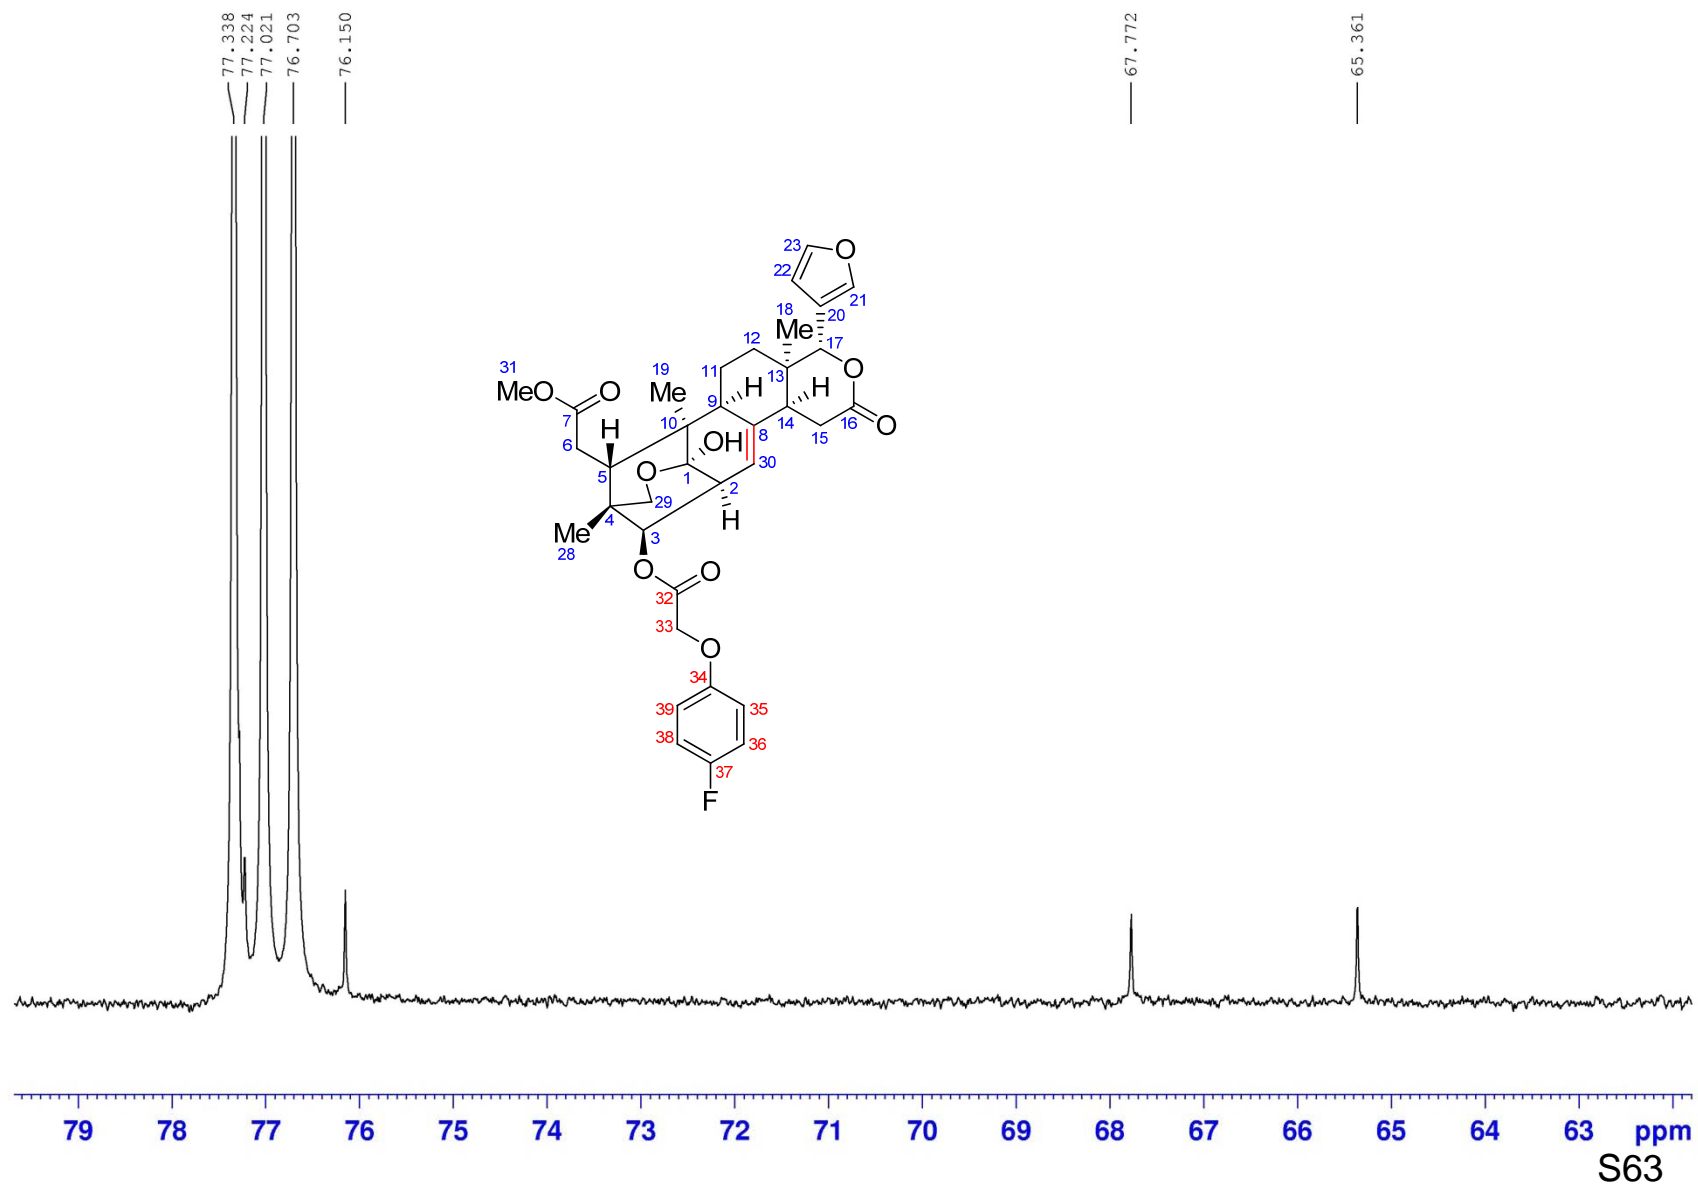

$^{13}\text{C}$  NMR (100 MHz) spectrum of **8c** in  $\text{CDCl}_3$

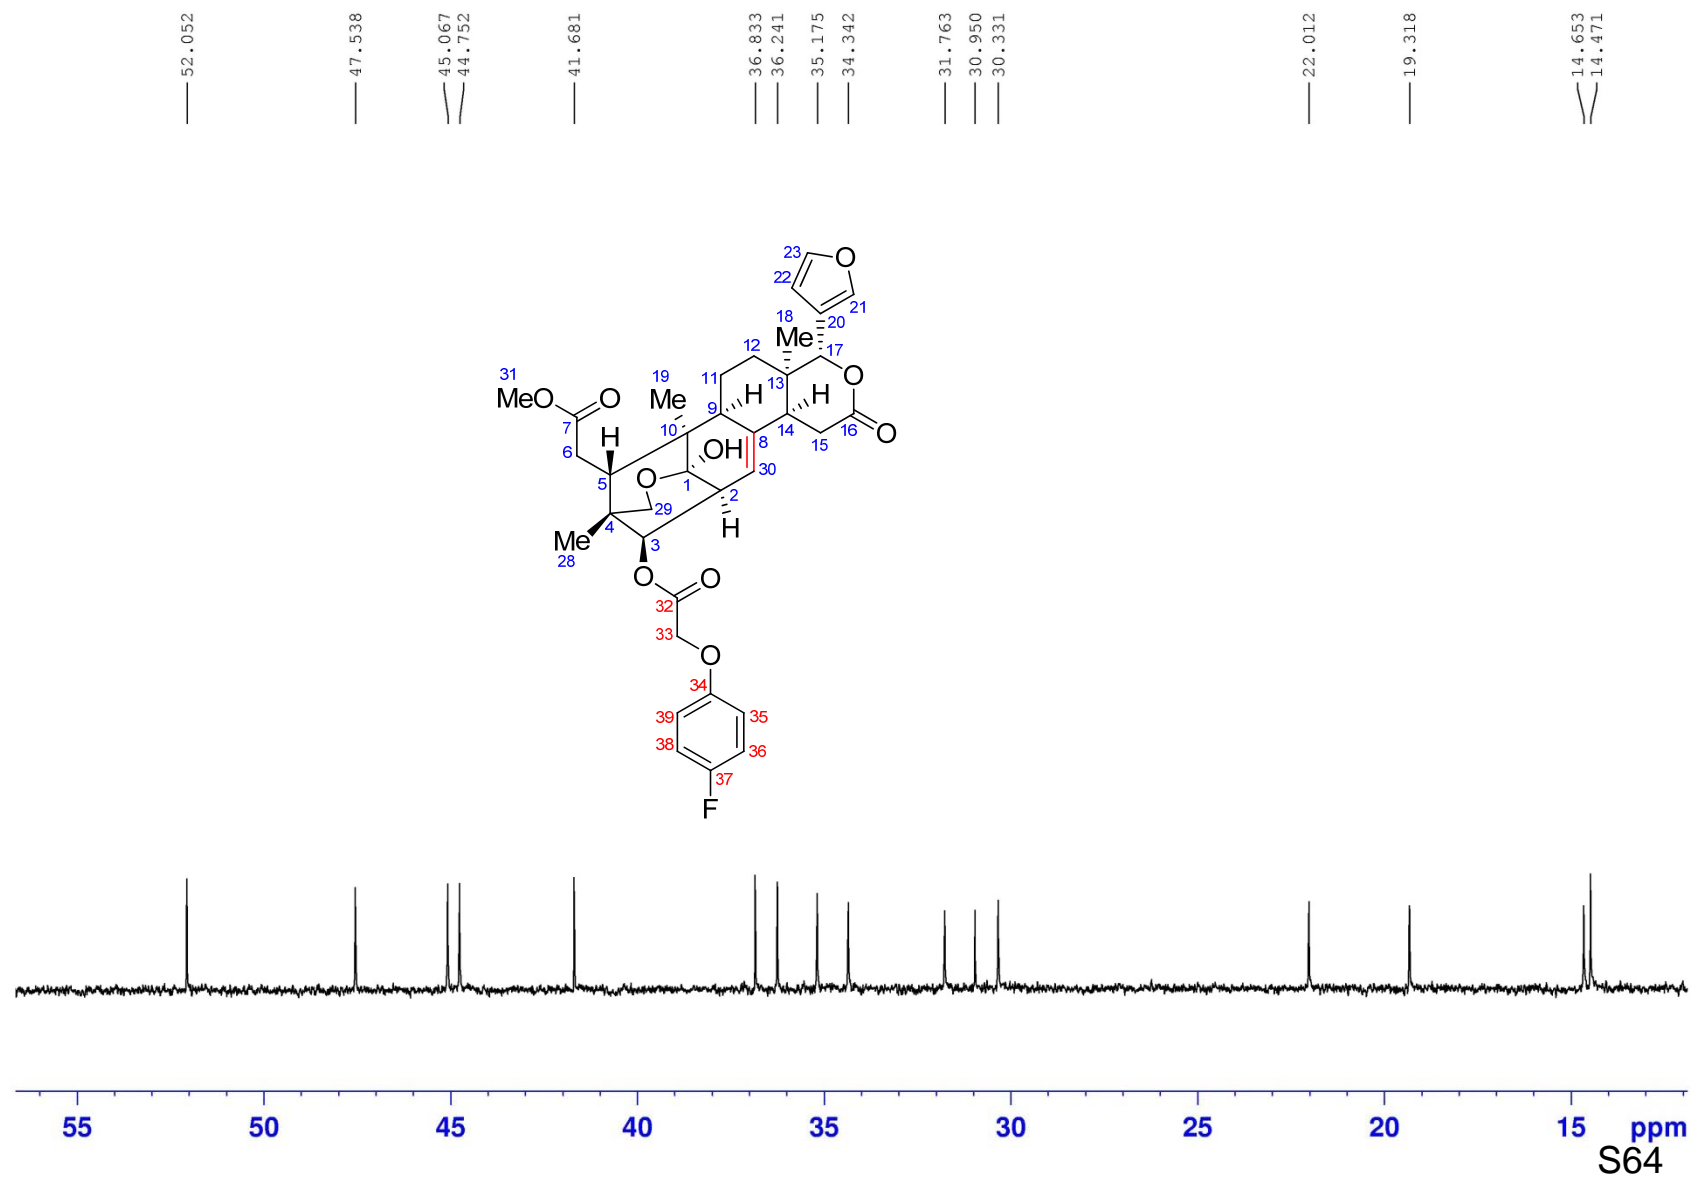

# DEPT 135 spectrum of **8c** in CDCl<sub>3</sub>

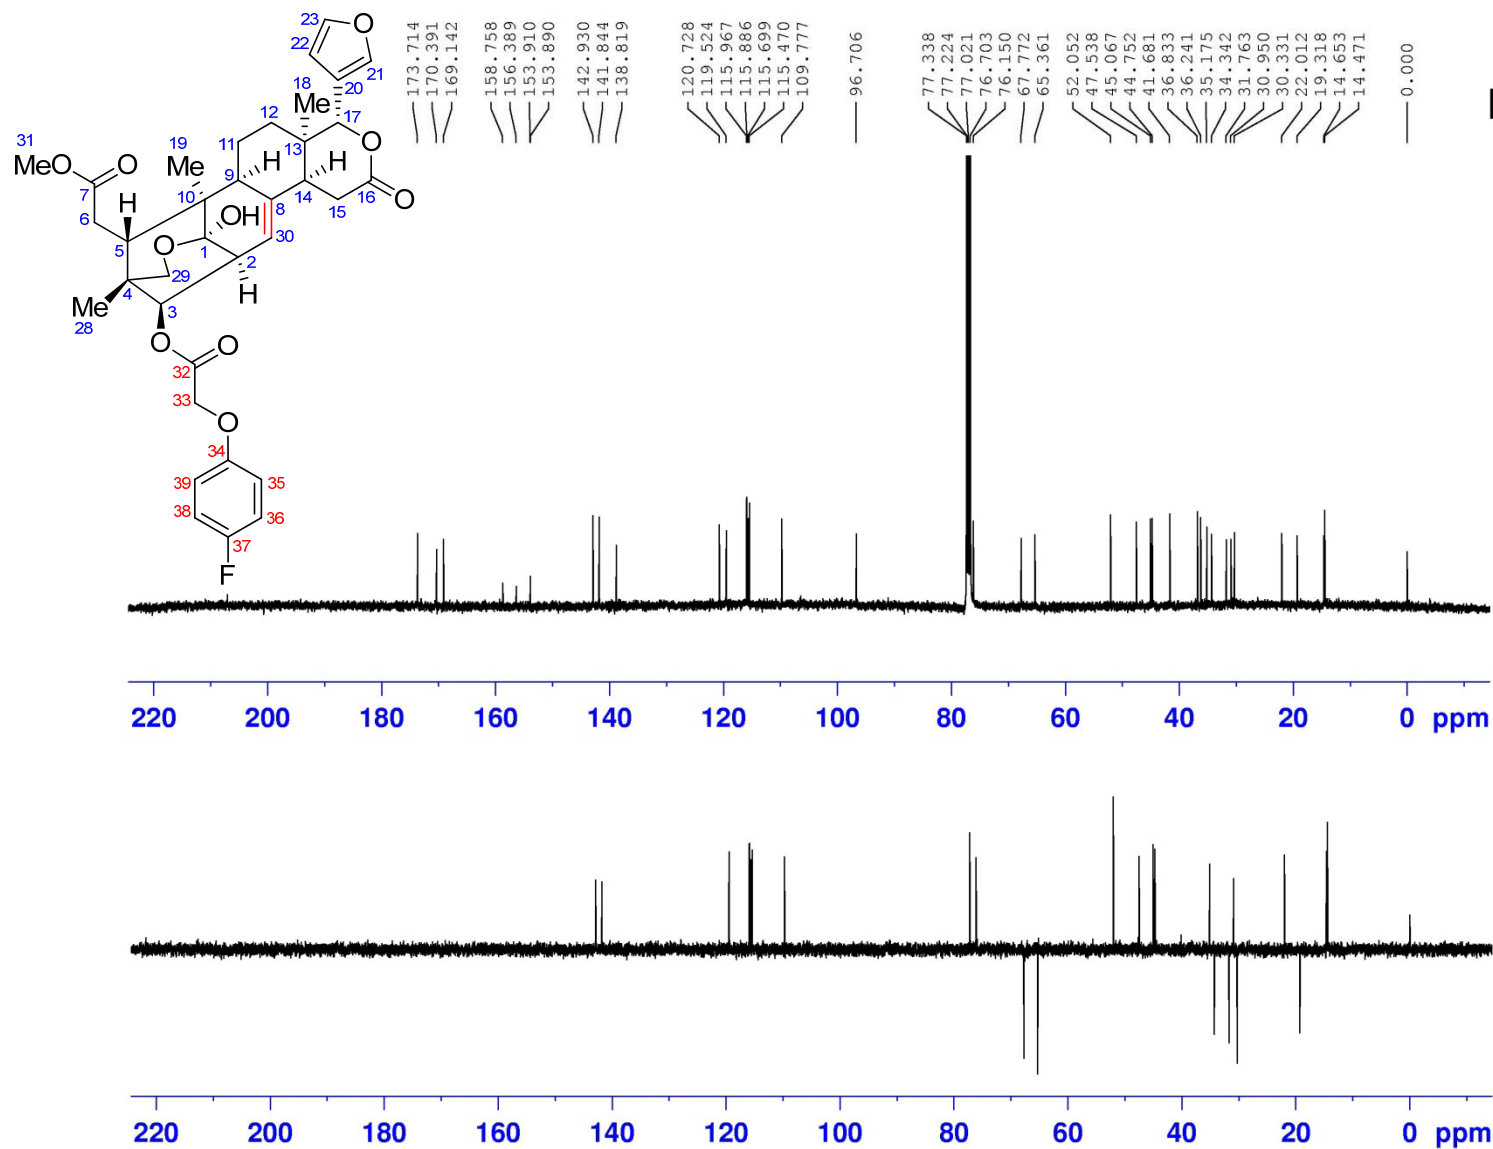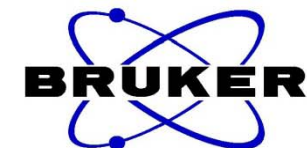

```

NAME      czc-1-CH3-4-F-BENYANG'
EXPNO     3
PROCNO    1
Date_     20171010
Time      1.53
INSTRUM   spect
PROBHD    5 mm CPPBBO BB
PULPROG   deptsp135
TD         65536
SOLVENT   CDCl3
NS         300
DS         4
SWH        24038.461 Hz
FIDRES     0.366798 Hz
AQ         1.3631988 sec
RG          73.92
DW         20.800 usec
DE         18.00 usec
TE         297.0 K
CNST2      145.0000000
D1         2.00000000 sec
D2         0.00344828 sec
D12        0.00002000 sec
TD0        1
    
```

```

CHANNEL f1
SFO1      100.6233324 MHz
NUC1       13C
P1         10.00 usec
P13        2000.00 usec
SI         32768
SF         100.6127692 MHz
WDW        EM
SSB        0
LB         1.00 Hz
GB         0
PC         1.40
    
```

# DEPT 135 spectrum of **8c** in CDCl<sub>3</sub>

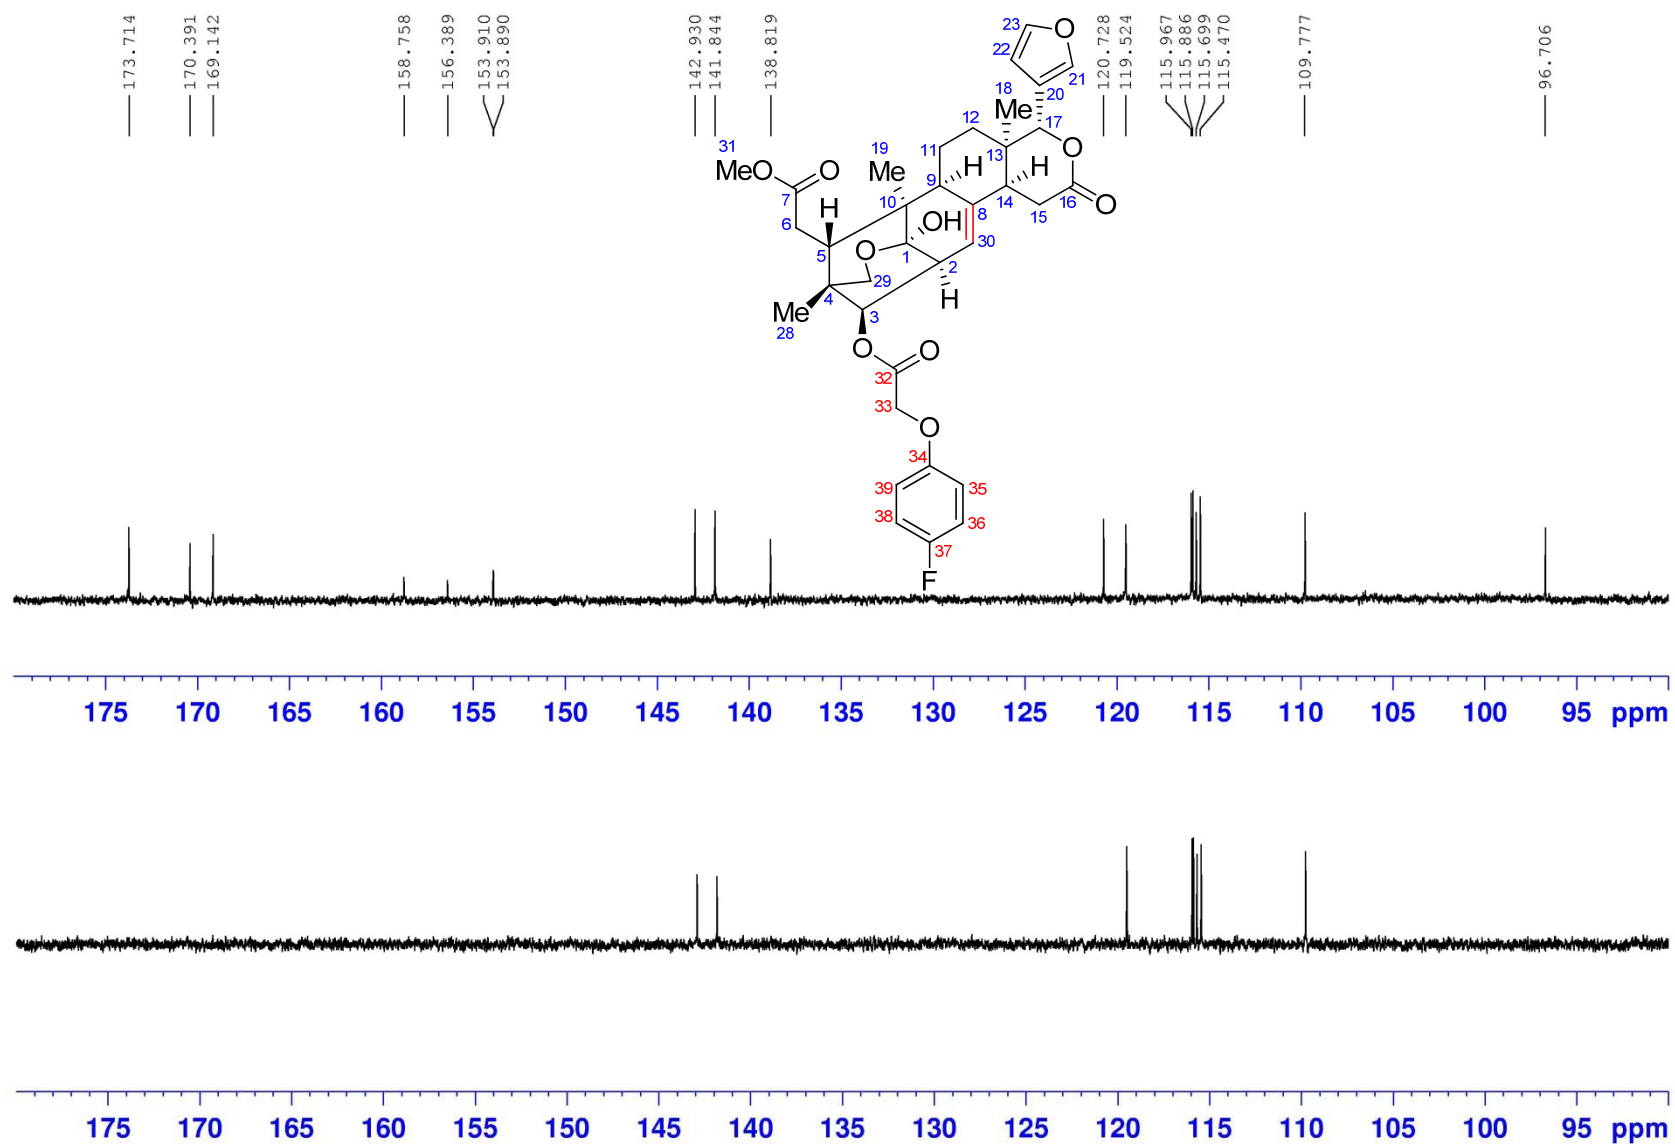



DEPT 135 spectrum of **8c** in CDCl<sub>3</sub>

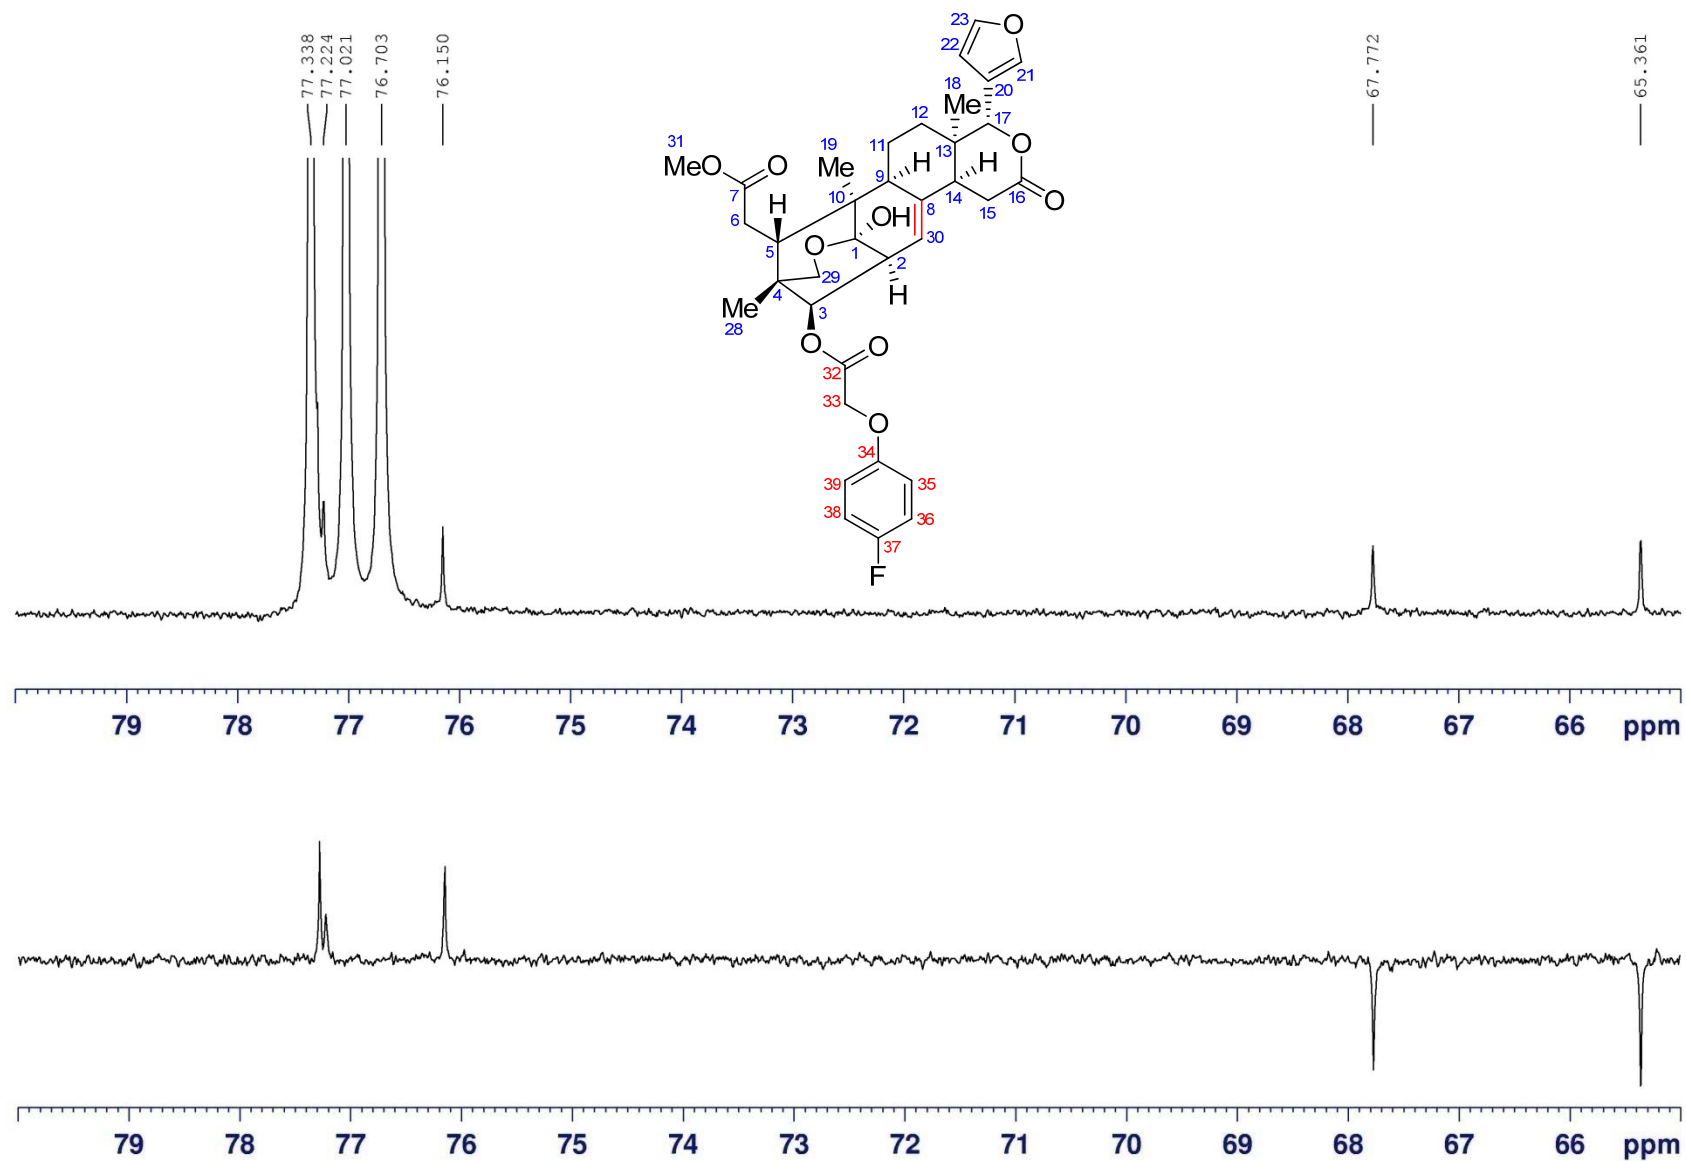

# DEPT 135 spectrum of **8c** in CDCl<sub>3</sub>

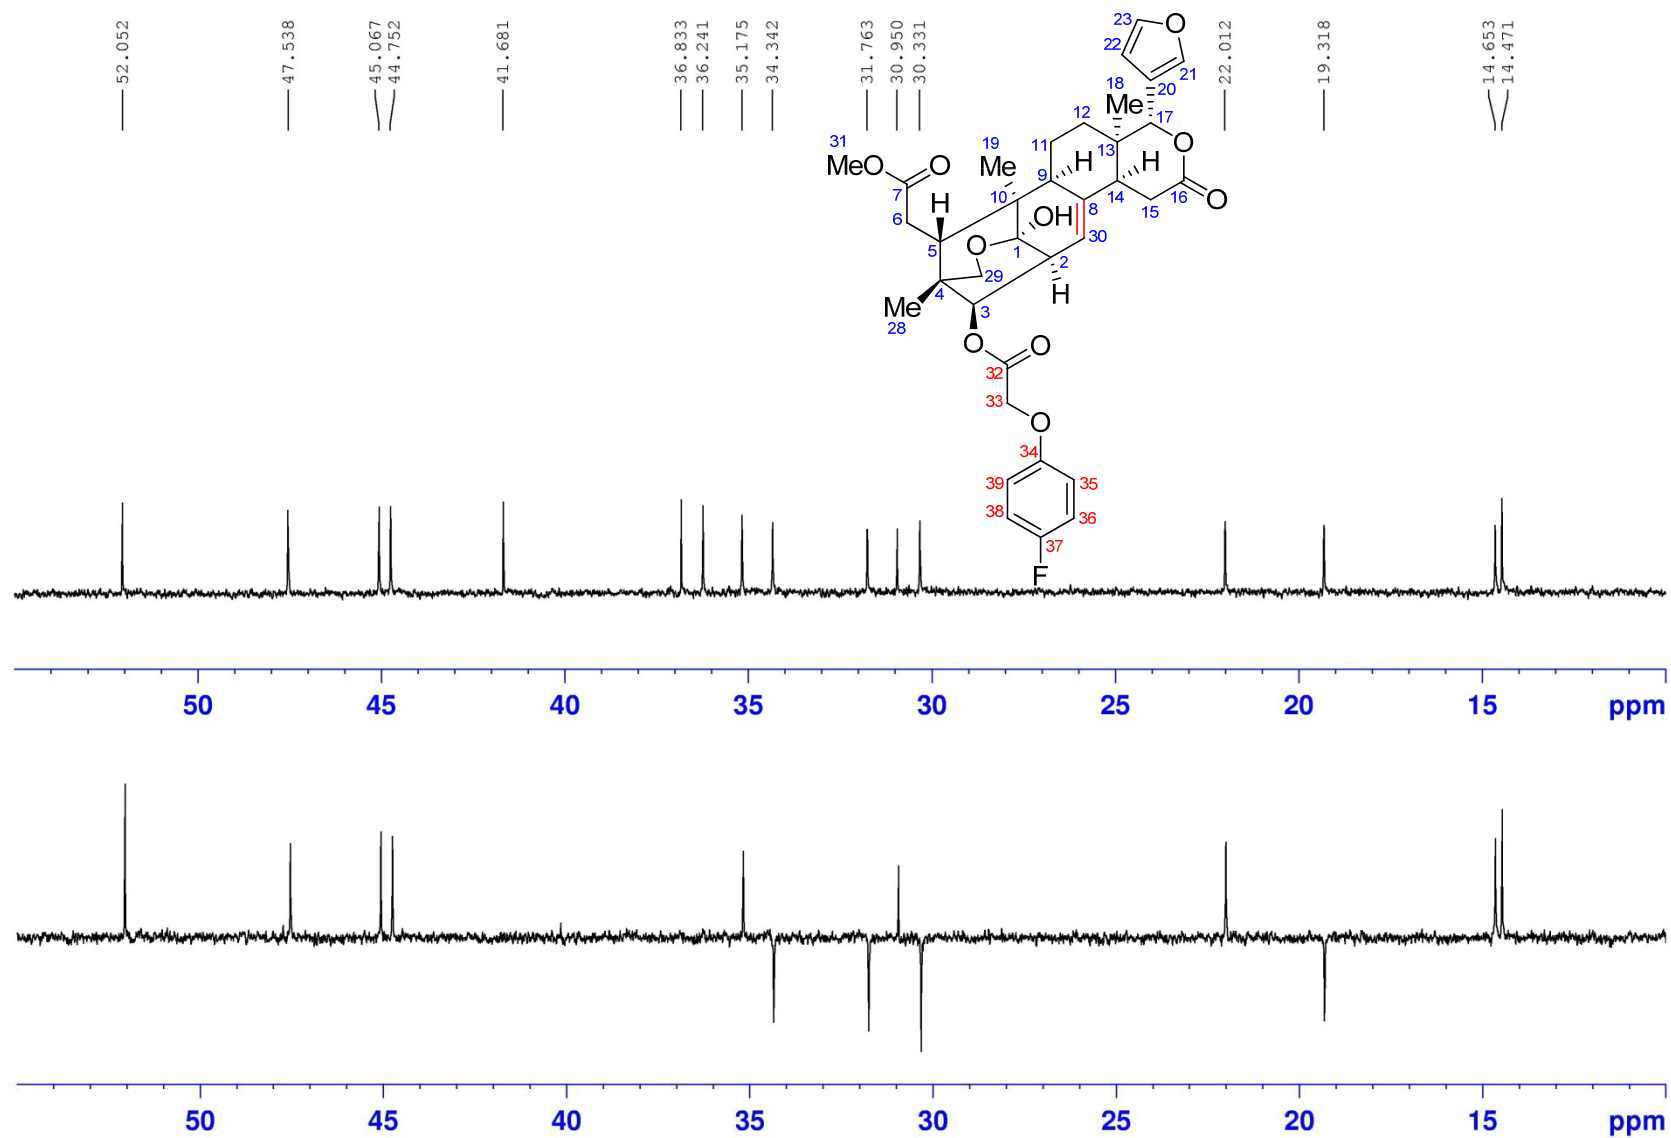

# HR-ESIMS for compound **8d**

## Generic Display Report

### Analysis Info

Analysis Name D:\Data\MS\data\201809\liwanshan\_WSD-68\_pos\_14\_01\_5575.d  
Method LC\_Direct Infusion\_pos\_100-1000mz.m  
Sample Name liwanshan\_WSD-68\_pos  
Comment

Acquisition Date 9/30/2018 6:05:28 PM

Operator SCSIO  
Instrument maXis

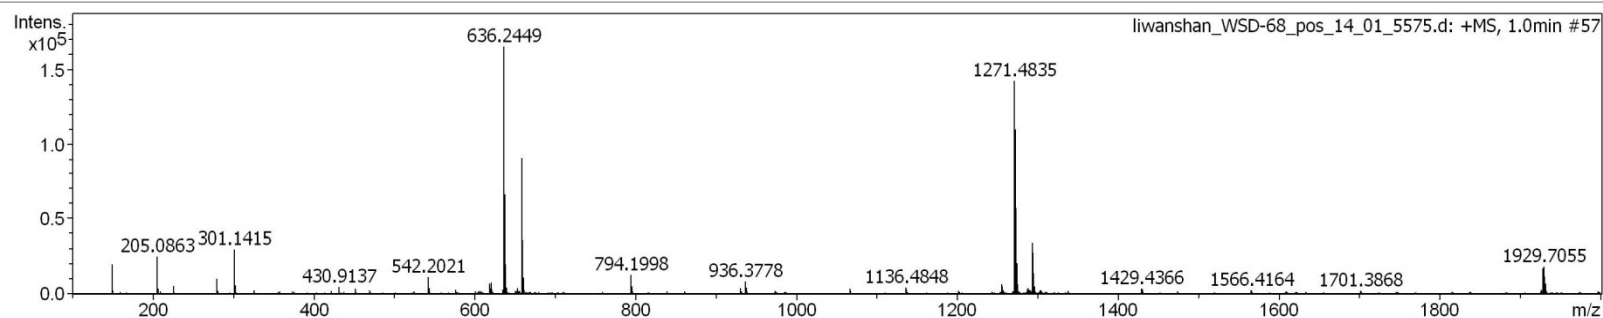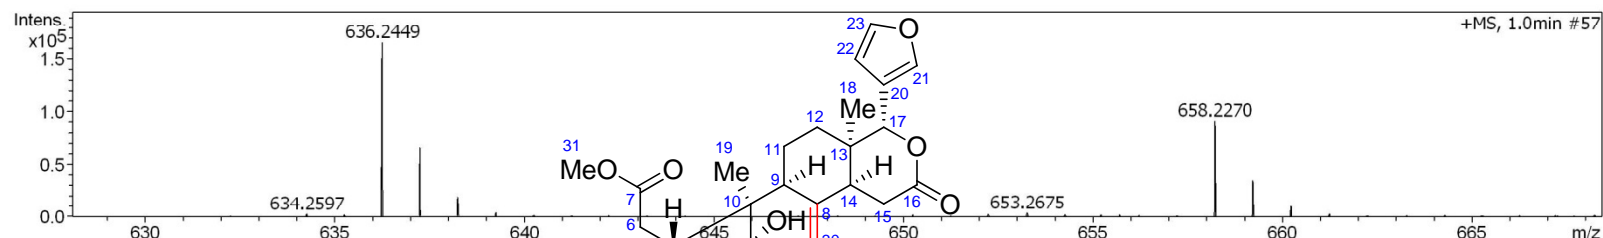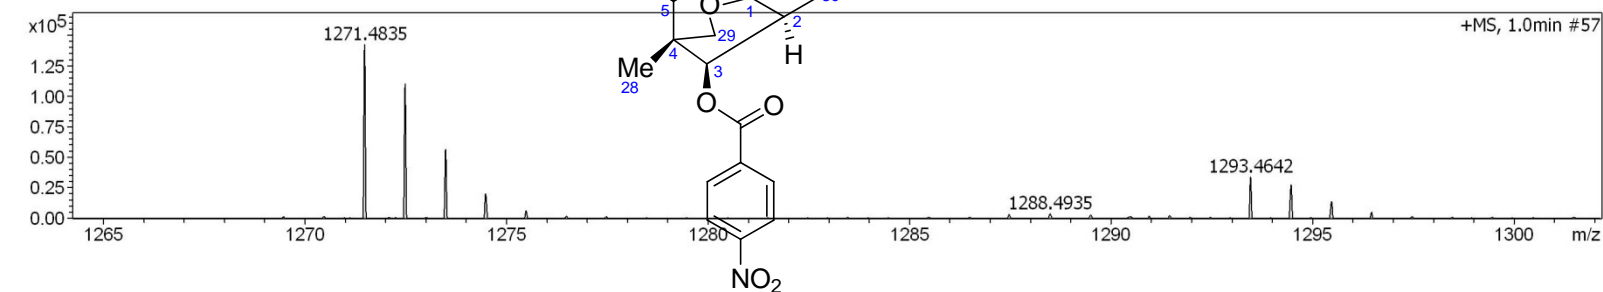

# HR-ESIMS for compound **8d**

## Mass Spectrum SmartFormula Report

### Analysis Info

Analysis Name D:\Data\MS\data\201809\liwanshan\_WSD-68\_pos\_14\_01\_5575.d  
 Method LC\_Direct Infusion\_pos\_100-1000mz.m  
 Sample Name liwanshan\_WSD-68\_pos  
 Comment

Acquisition Date 9/30/2018 6:05:28 PM  
 Operator SCSIO  
 Instrument maXis 255552.00029

### Acquisition Parameter

|             |          |                      |          |                  |           |
|-------------|----------|----------------------|----------|------------------|-----------|
| Source Type | ESI      | Ion Polarity         | Positive | Set Nebulizer    | 0.4 Bar   |
| Focus       | Active   | Set Capillary        | 4500 V   | Set Dry Heater   | 180 °C    |
| Scan Begin  | 100 m/z  | Set End Plate Offset | -500 V   | Set Dry Gas      | 4.0 l/min |
| Scan End    | 2000 m/z | Set Charging Voltage | 0 V      | Set Divert Valve | Waste     |
|             |          | Set Corona           | 0 nA     | Set APCI Heater  | 0 °C      |

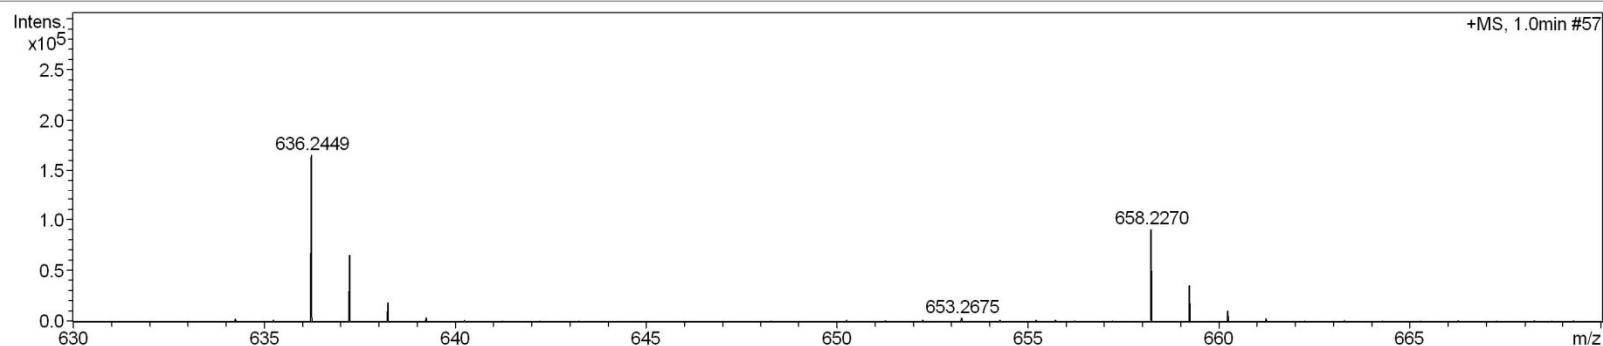

| Meas. m/z | # | Ion Formula   | Score  | m/z       | err [ppm] | err [mDa] | mSigma | rdb  | e <sup>-</sup> Conf | N-Rule |
|-----------|---|---------------|--------|-----------|-----------|-----------|--------|------|---------------------|--------|
| 636.2449  | 1 | C34H38NO11    | 100.00 | 636.2439  | -1.5      | -0.9      | 16.8   | 16.5 | even                | ok     |
| 658.2270  | 1 | C34H37NNaO11  | 100.00 | 658.2259  | -1.6      | -1.1      | 14.2   | 16.5 | even                | ok     |
| 1271.4835 | 1 | C68H75N2O22   | 77.91  | 1271.4806 | -2.3      | -2.9      | 33.3   | 32.5 | even                | ok     |
| 1293.4642 | 1 | C68H74N2NaO22 | 100.00 | 1293.4625 | -1.3      | -1.7      | 41.6   | 32.5 | even                | ok     |

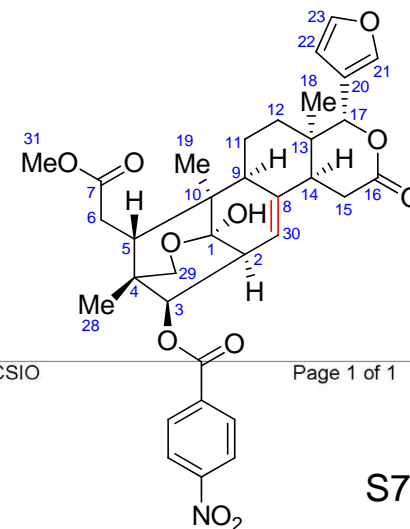

# <sup>1</sup>H NMR (400 MHz) spectrum of **8d** in CDCl<sub>3</sub>

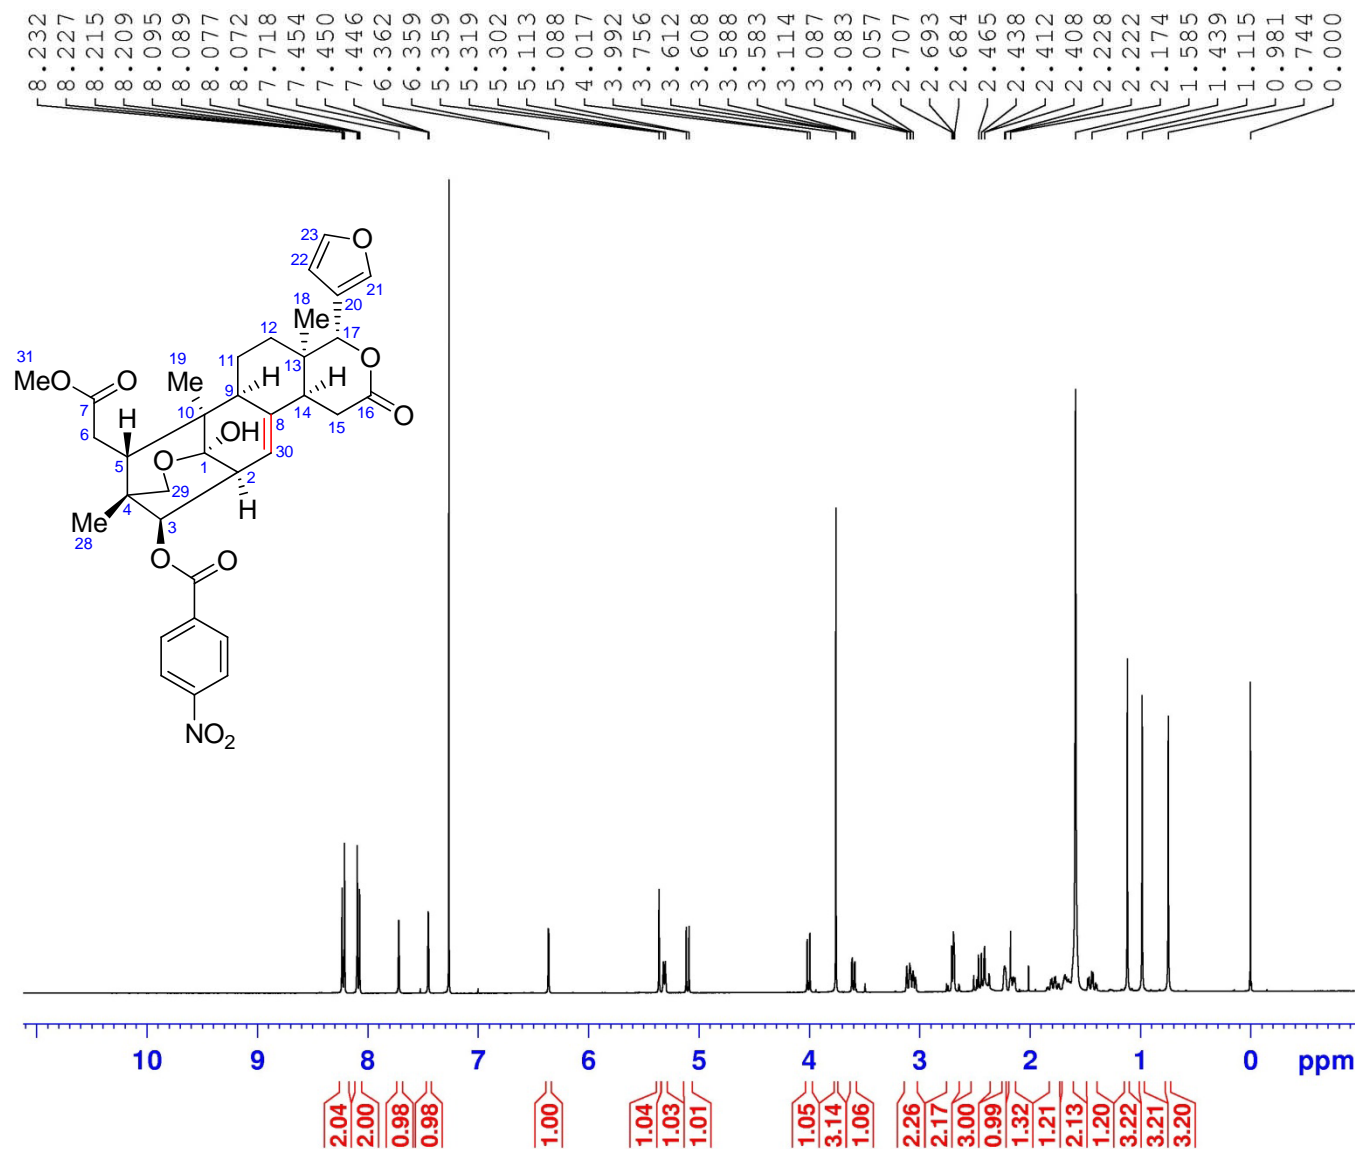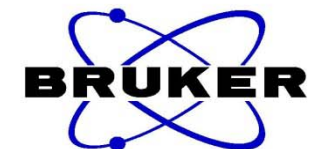

```

NAME      czc-1-CH3-duixia
EXPNO     1
PROCNO    1
Date_     20170922
Time      23.09
INSTRUM   spect
PROBHD    5 mm CPPBBO BB
PULPROG   zg30
TD         65536
SOLVENT   CDCl3
NS         16
DS         2
SWH        8223.685 F
FIDRES     0.125483 F
AQ         3.9846387 s
RG         208.5
DW         60.800 u
DE         10.00 u
TE         297.0 K
D1         1.00000000 s
TD0        1
  
```

```

===== CHANNEL f1 =====
SFO1      400.1324710 M
NUC1       1H
P1        11.50 u
SI         65536
SF         400.1300083 M
WDW        EM
SSB        0
LB         0.30 F
GB         0
PC         1.00
  
```

$^1\text{H}$  NMR (400 MHz) spectrum of **8d** in  $\text{CDCl}_3$

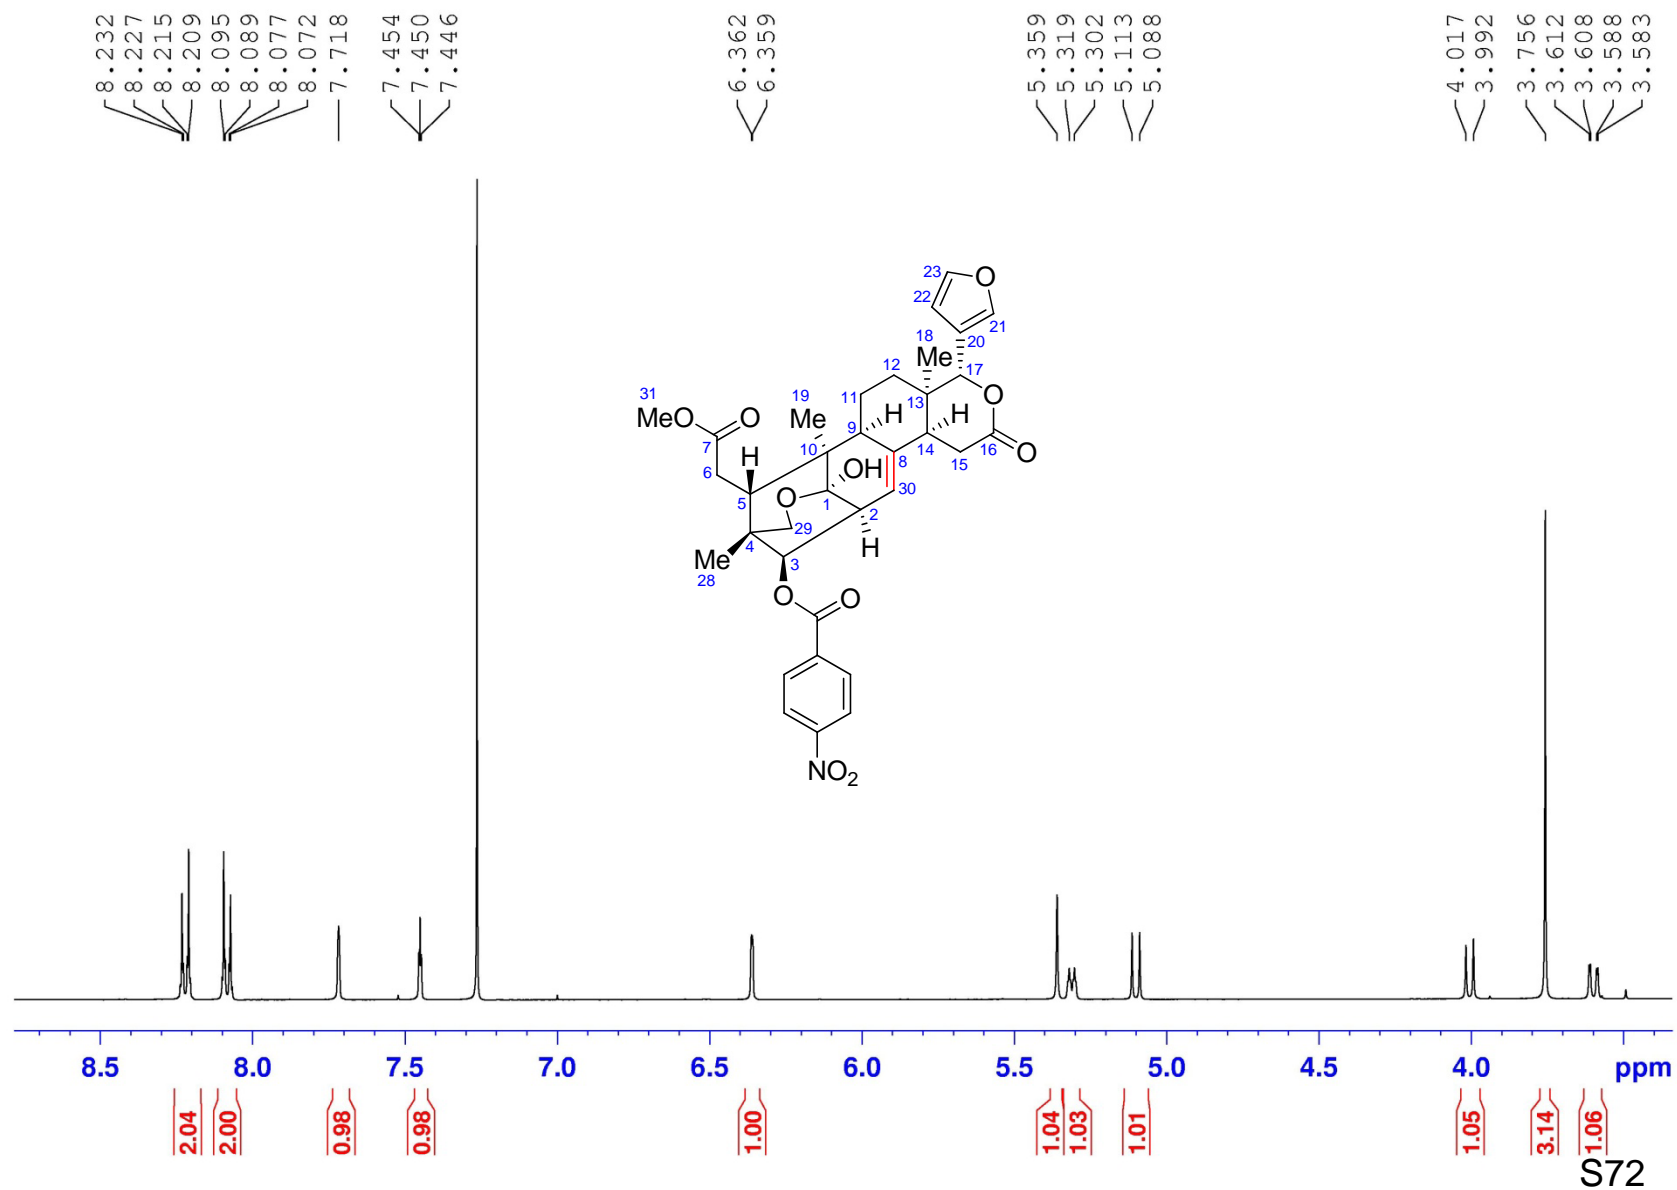

$^1\text{H}$  NMR (400 MHz) spectrum of **8d** in  $\text{CDCl}_3$

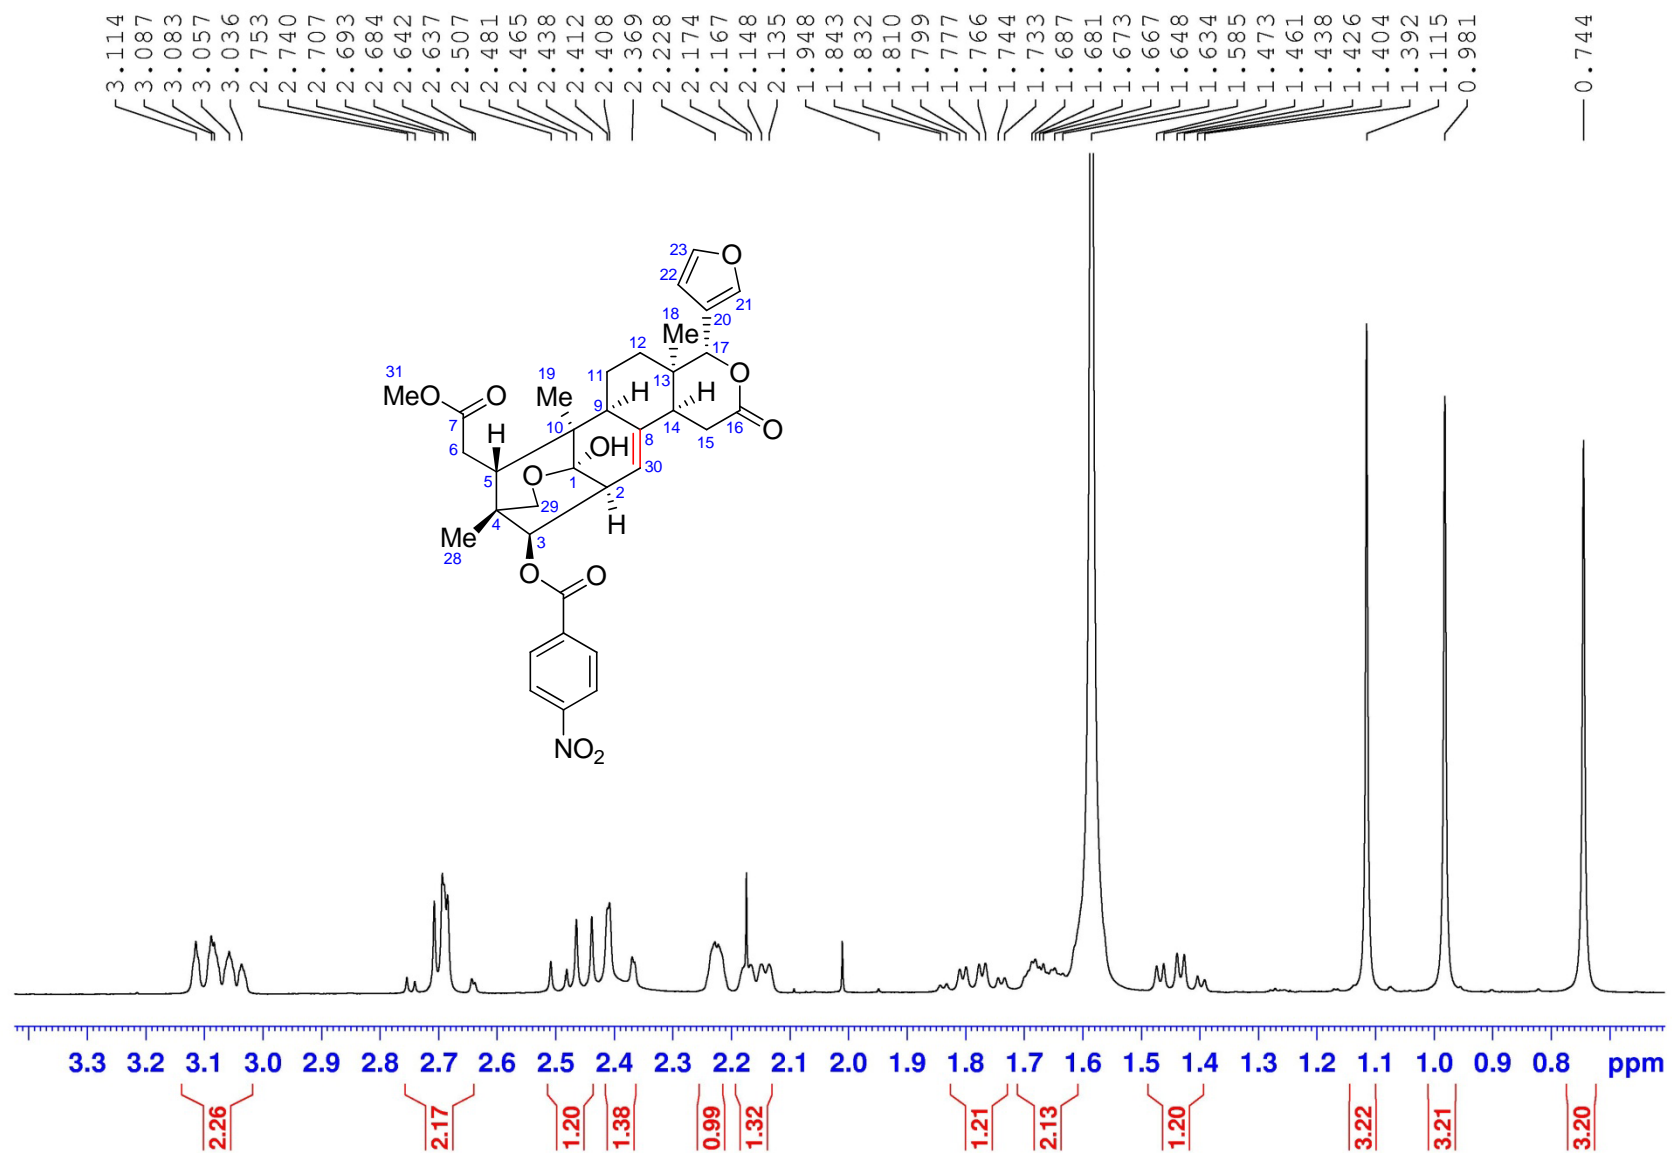

$^{13}\text{C}$  NMR (100 MHz) spectrum of **8d** in  $\text{CDCl}_3$

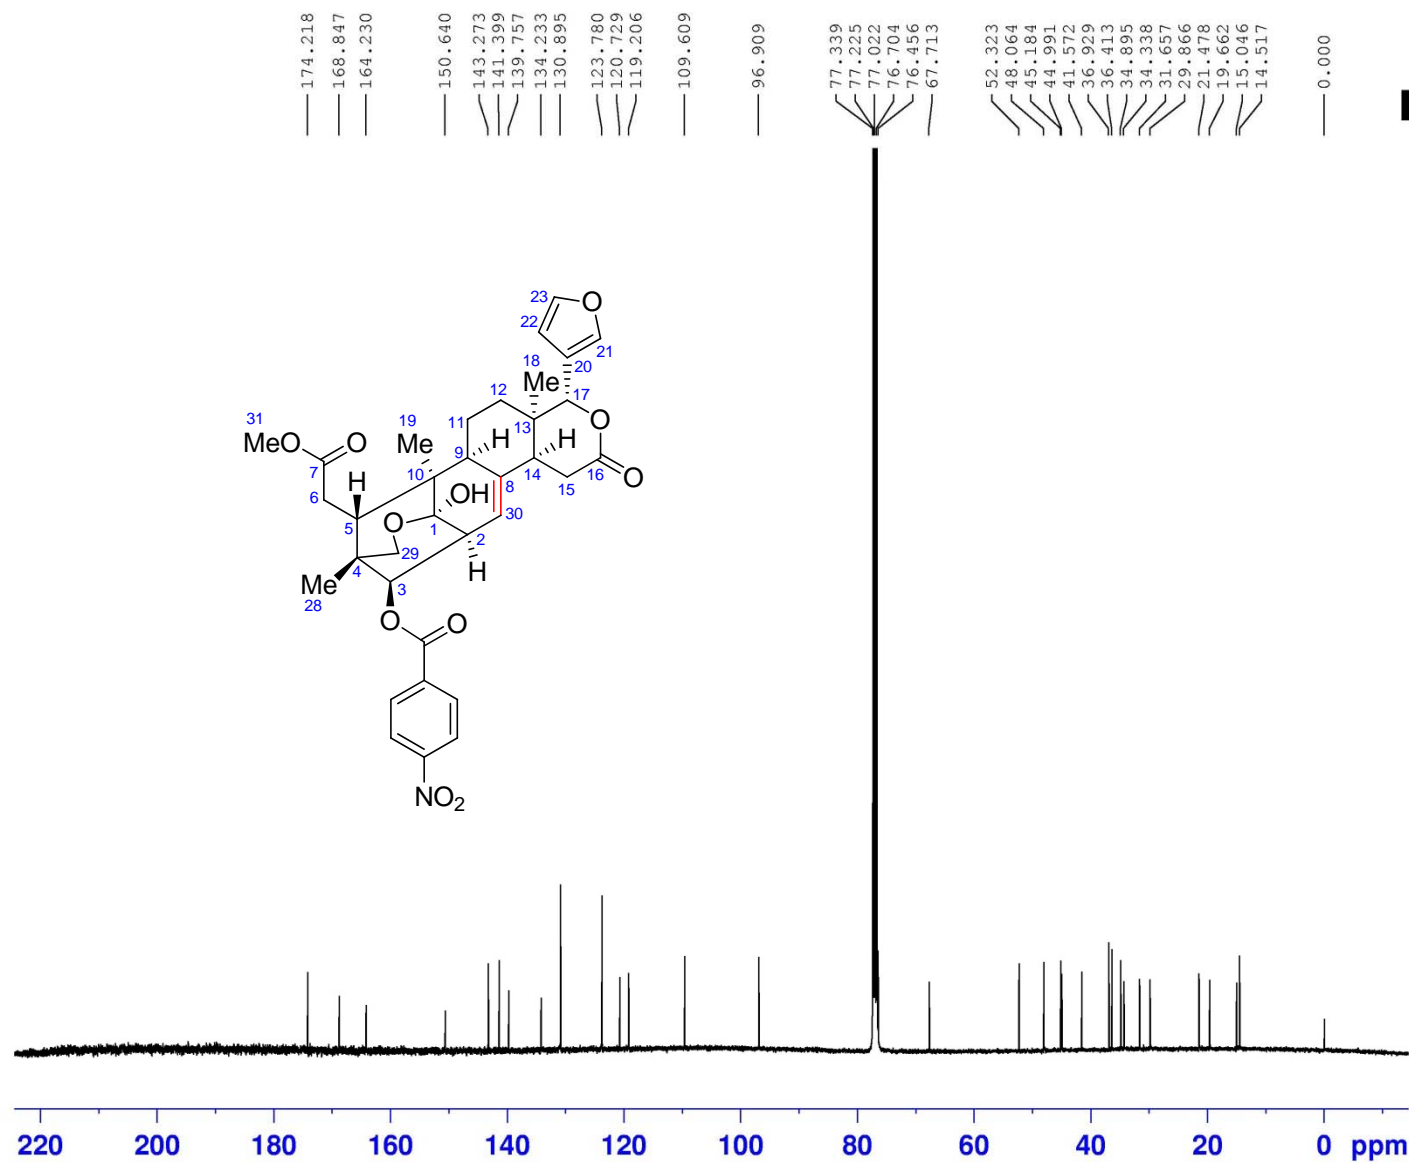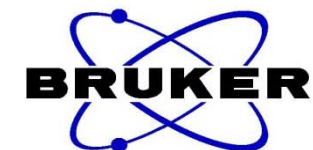

```

NAME      czc-1-CH3-duixia
EXPNO     2
PROCNO    1
Date_     20170923
Time      8.42
INSTRUM   spect
PROBHD    5 mm CPPBBO BB
PULPROG   zgpg30
TD        65536
SOLVENT   CDC13
NS        10000
DS        4
SWH       24038.461 E
FIDRES    0.366798 E
AQ        1.3631988 s
RG        130.26
DW        20.800 u
DE        18.00 u
TE        297.0 K
D1        2.00000000 s
D11       0.03000000 s
TD0       1
    
```

```

===== CHANNEL f1 =====
SFO1      100.6233324 M
NUC1      13C
P1        10.00 u
SI        32768
SF        100.6127690 M
WDW       EM
SSB       0
LB        1.00 E
GB        0
PC        1.40
    
```



$^{13}\text{C}$  NMR (100 MHz) spectrum of **8d** in  $\text{CDCl}_3$

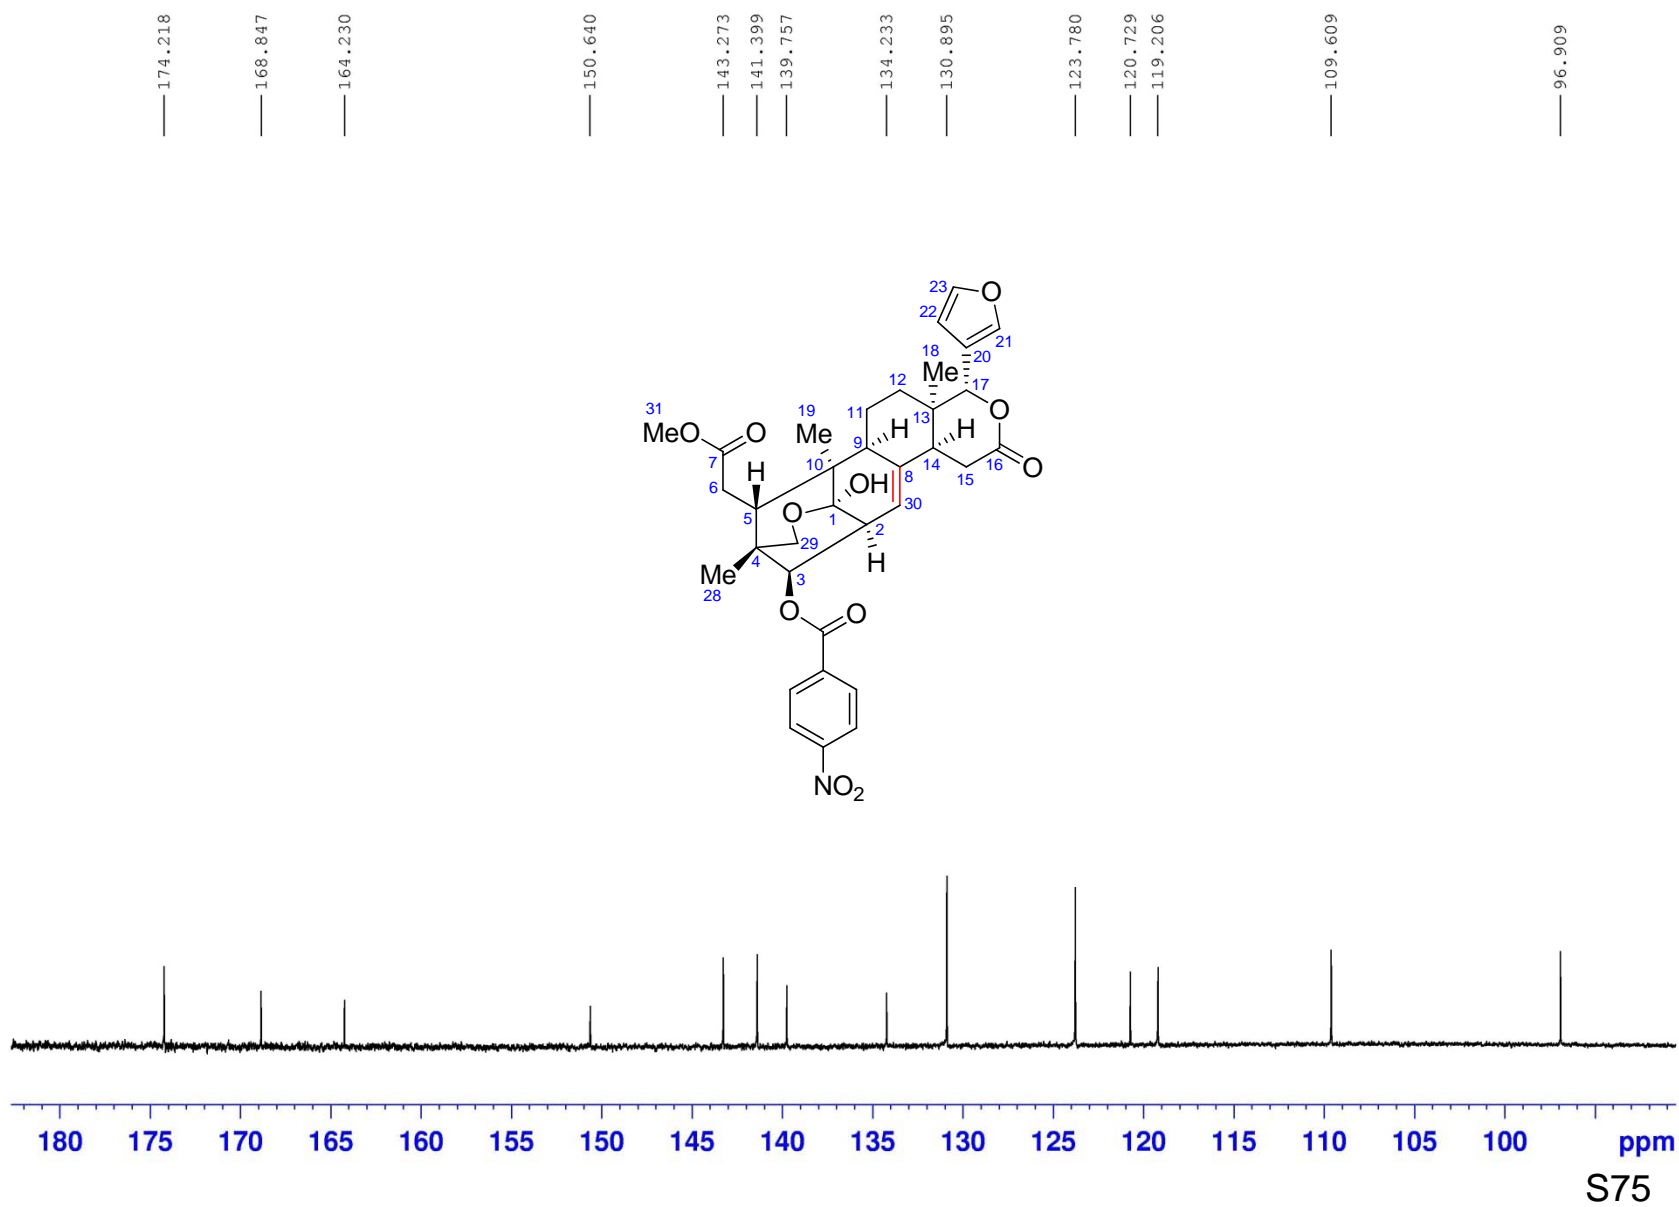

$^{13}\text{C}$  NMR (100 MHz) spectrum of **8d** in  $\text{CDCl}_3$

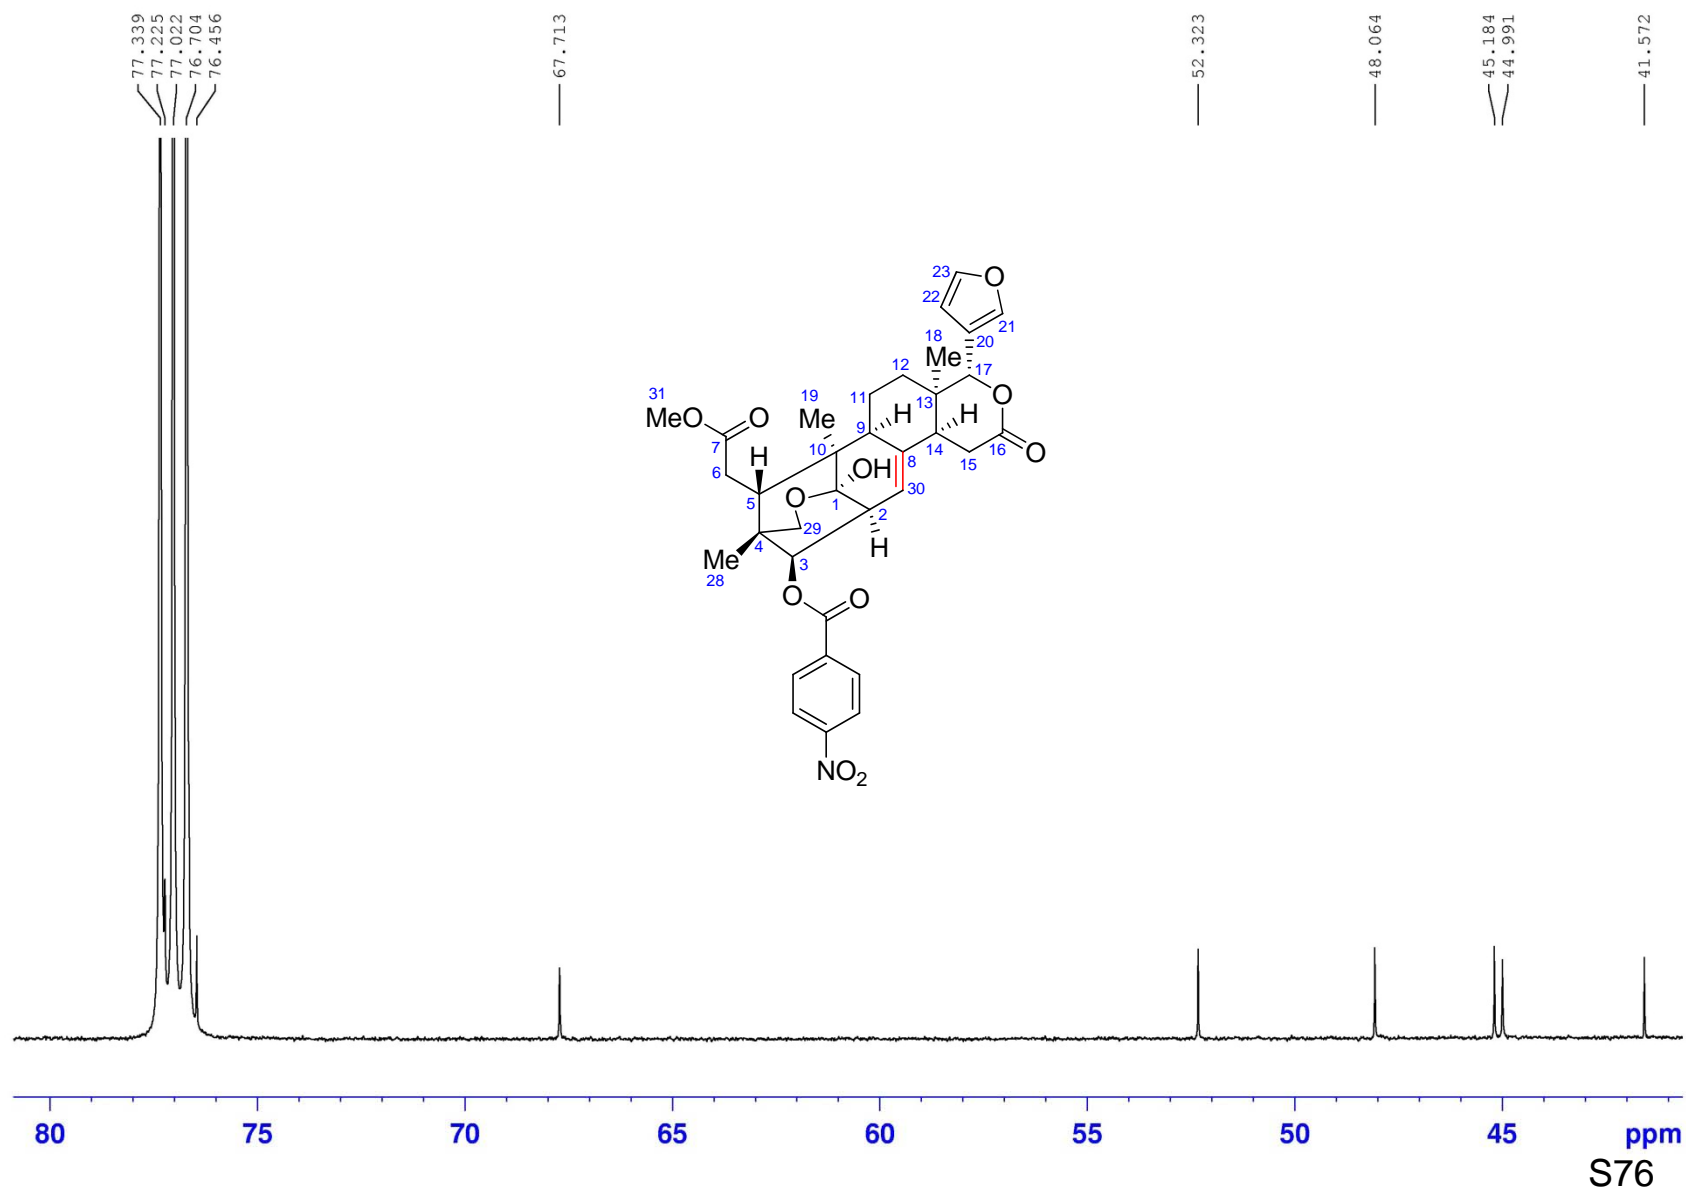

$^{13}\text{C}$  NMR (100 MHz) spectrum of **8d** in  $\text{CDCl}_3$

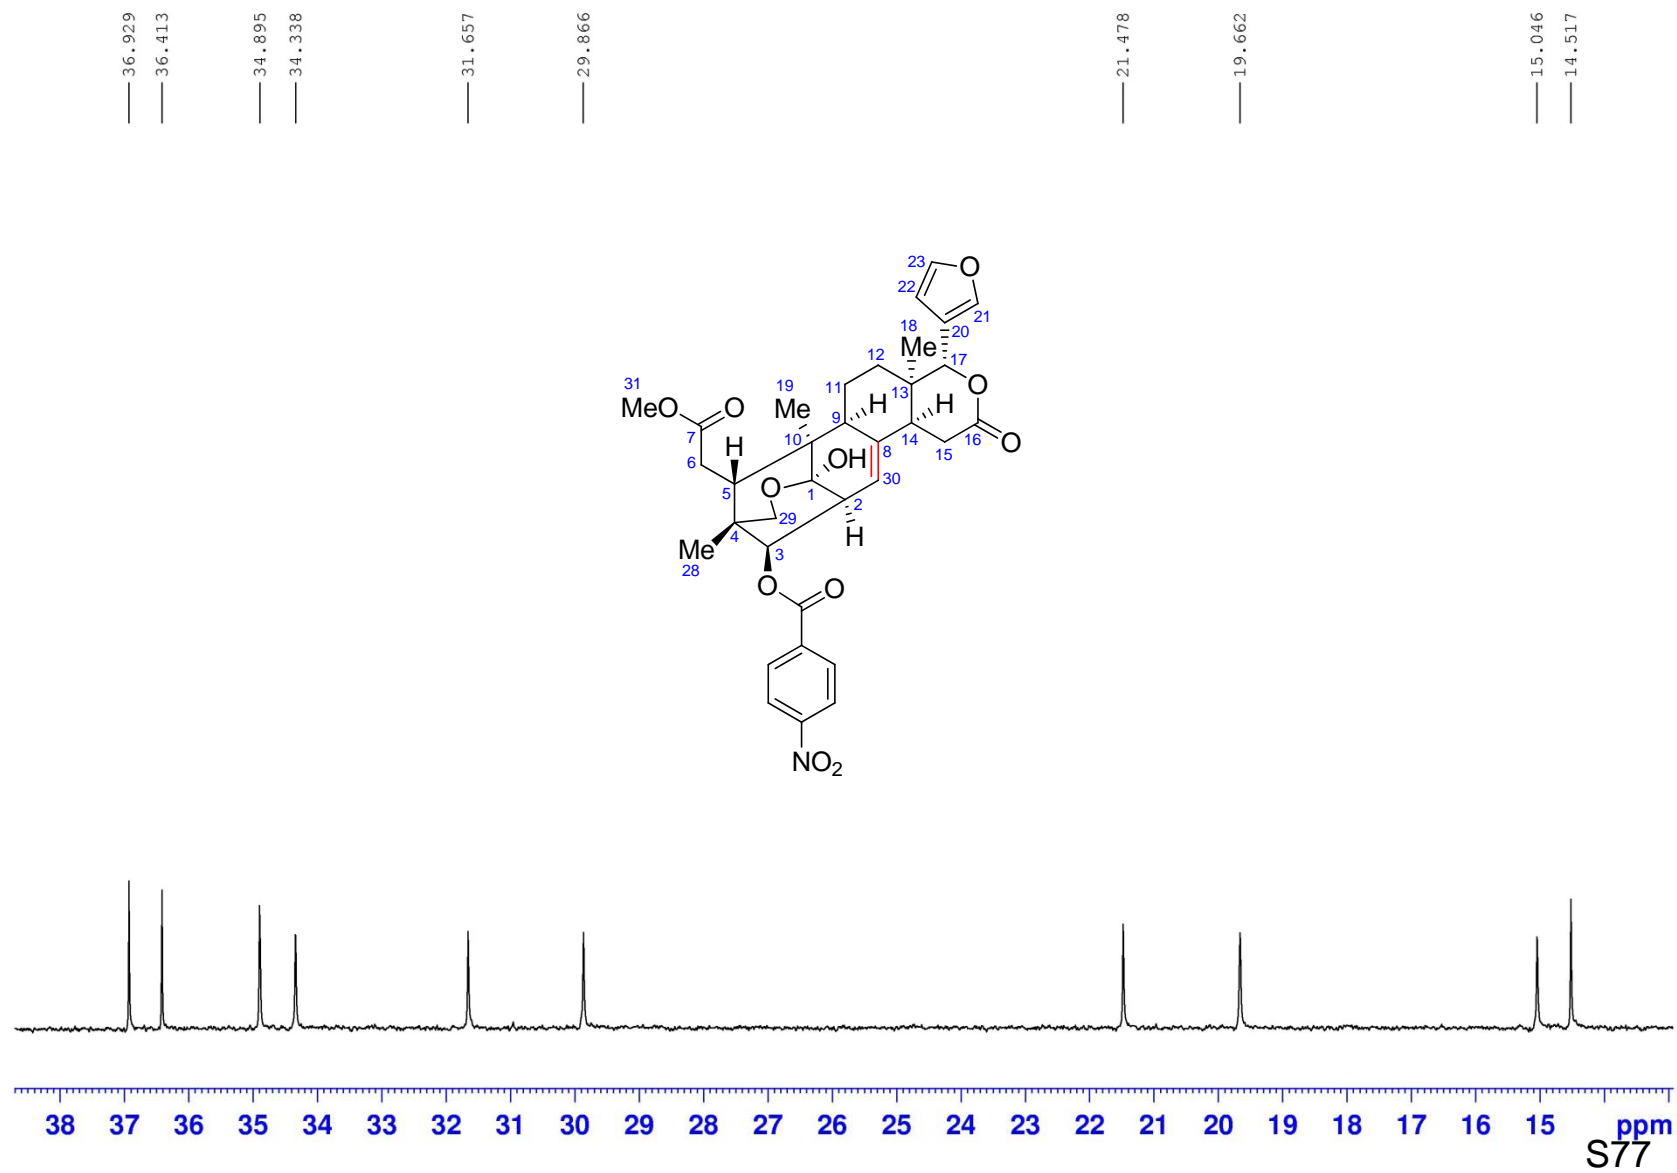

# DEPT 135 spectrum of **8d** in CDCl<sub>3</sub>

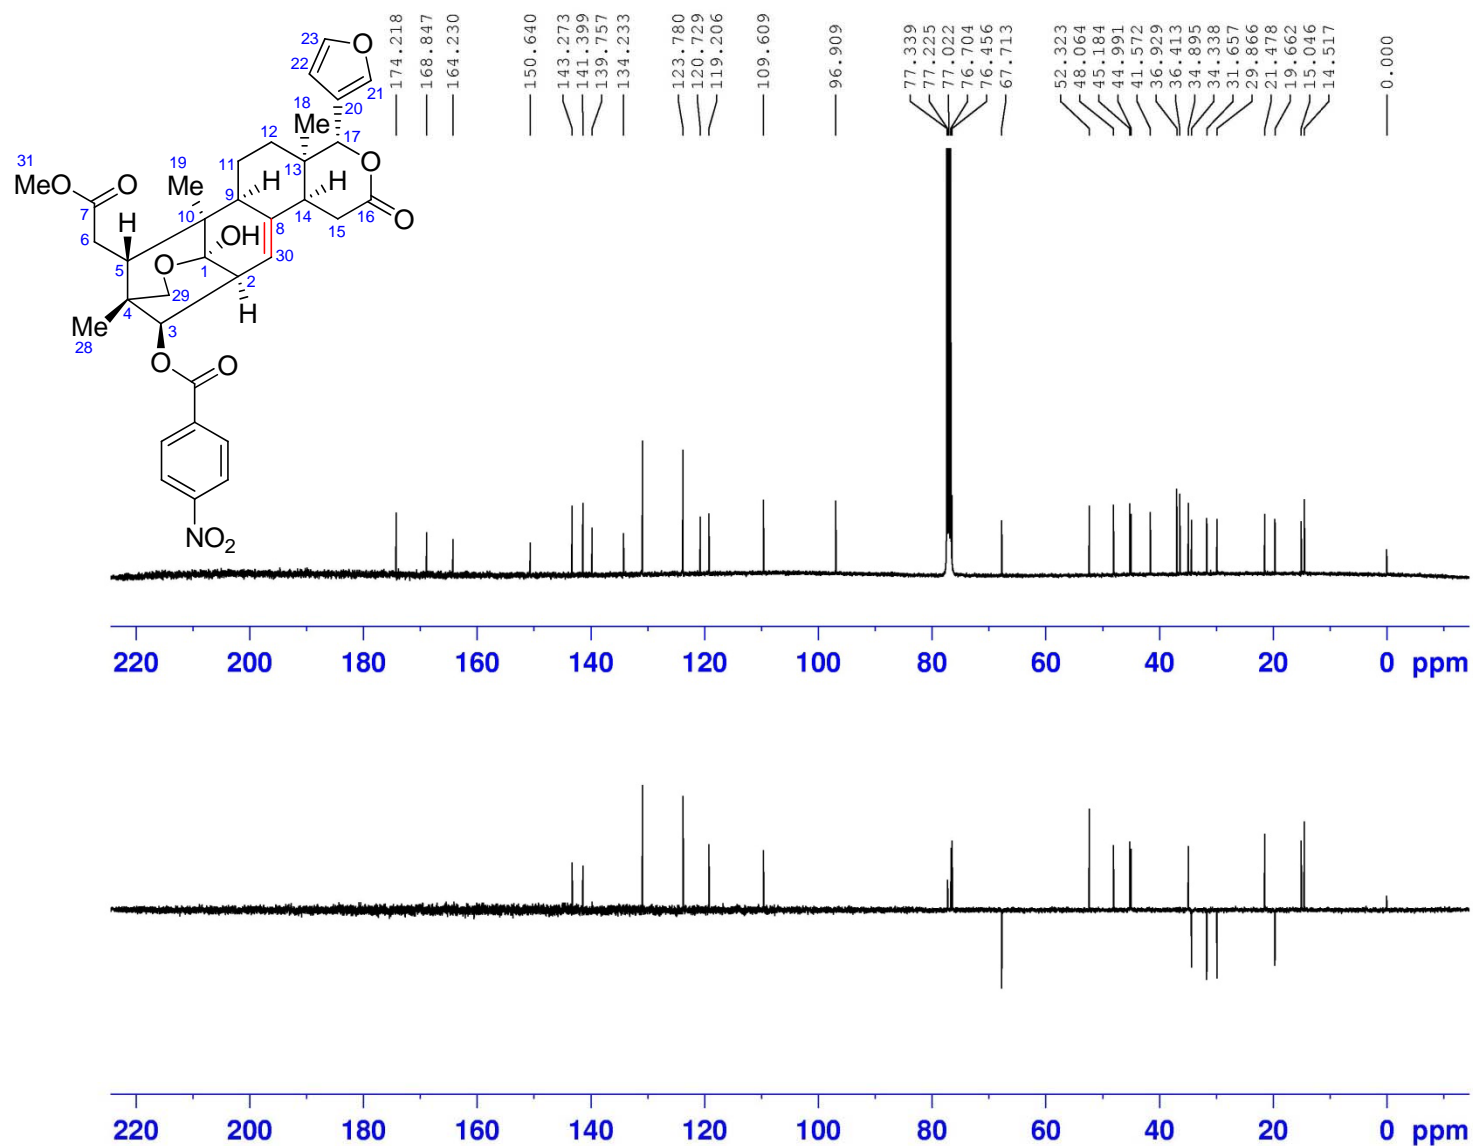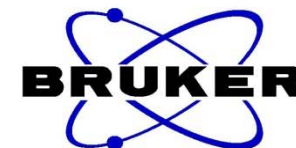

```

NAME      czc-1-CH3-duixia
EXPNO     3
PROCNO    1
Date_     20170923
Time      11.06
INSTRUM   spect
PROBHD    5 mm CPPBBO BB
PULPROG   deptsp135
TD        65536
SOLVENT   CDCl3
NS        2500
DS        4
SWH       24038.461 MHz
FIDRES    0.366798 Hz
AQ        1.3631988 s
RG        130.26
DW        20.800 us
DE        18.00 us
TE        297.0 K
CNST2     145.0000000
D1        2.00000000 s
D2        0.00344828 s
D12       0.00002000 s
TD0       1
    
```

```

===== CHANNEL f1 =====
SFO1     100.6233324 MHz
NUC1     13C
P1       10.00 us
P13      2000.00 us
SI       32768
SF       100.6127691 MHz
WDW      EM
SSB      0
LB       1.00 MHz
GB       0
PC       1.40
    
```

# DEPT 135 spectrum of **8d** in CDCl<sub>3</sub>

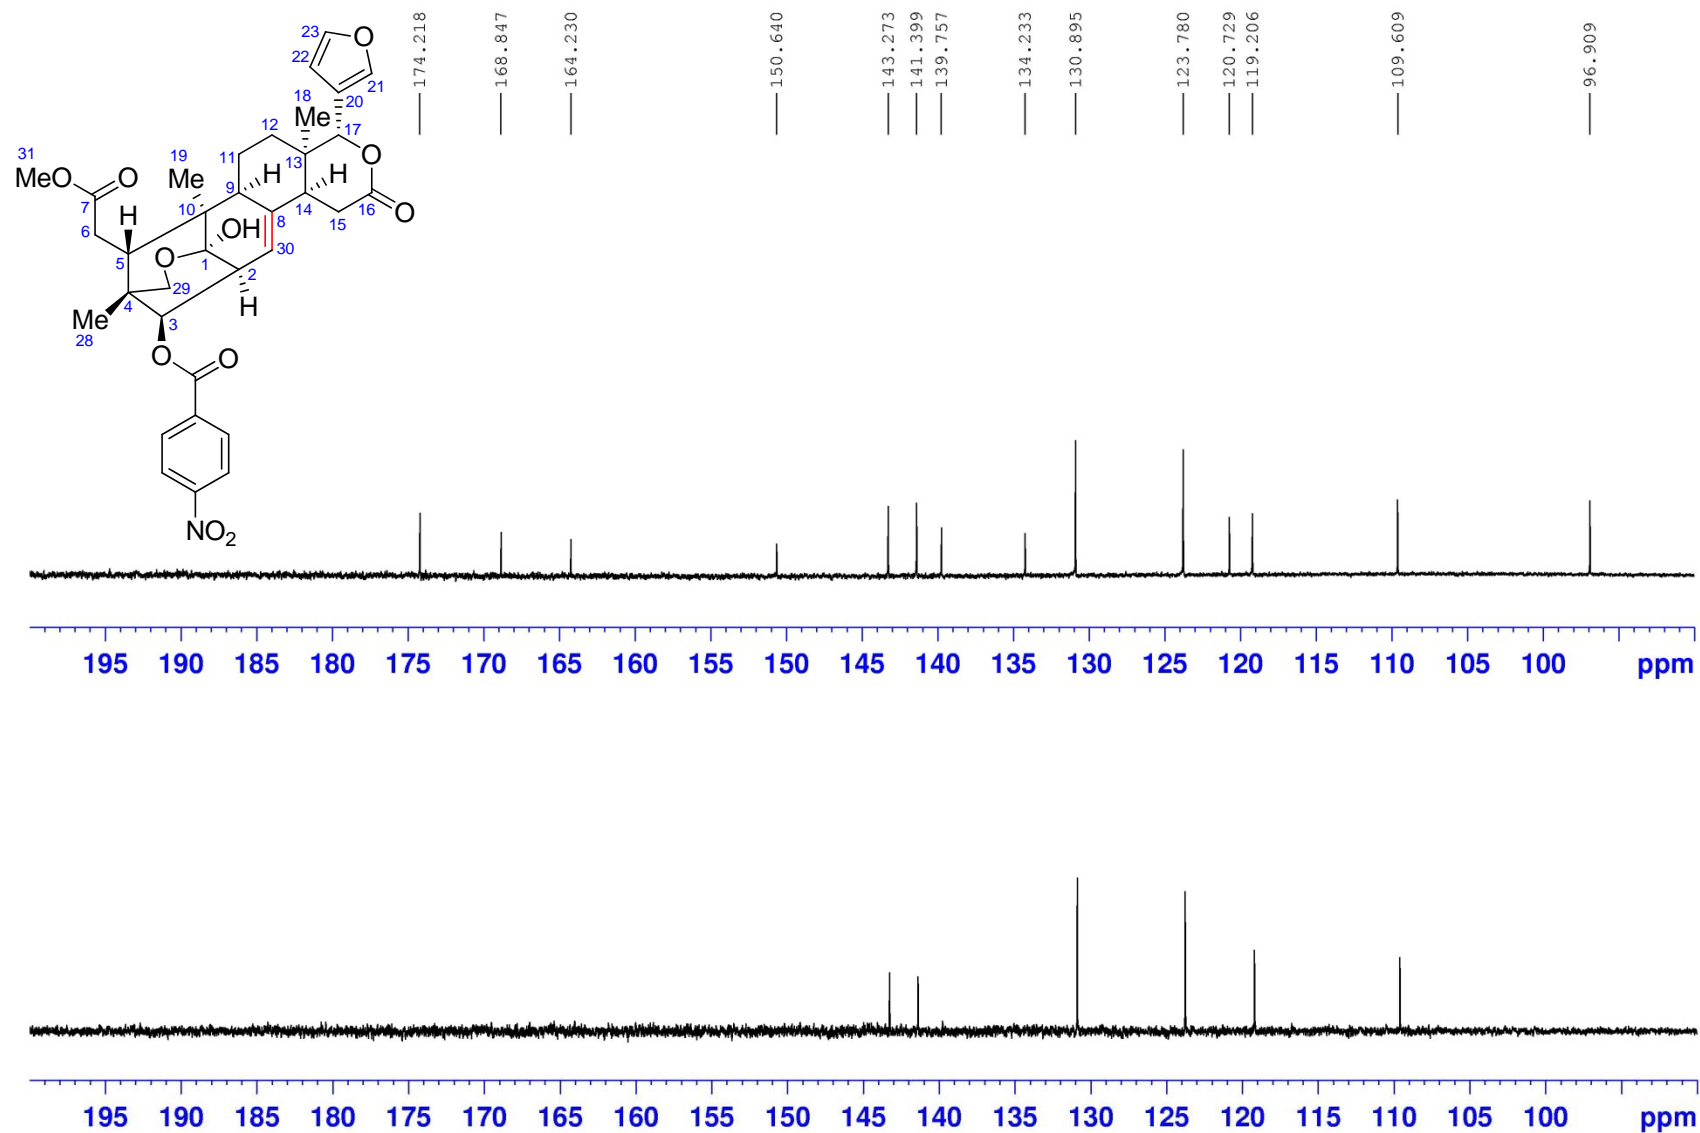

# DEPT 135 spectrum of **8d** in CDCl<sub>3</sub>

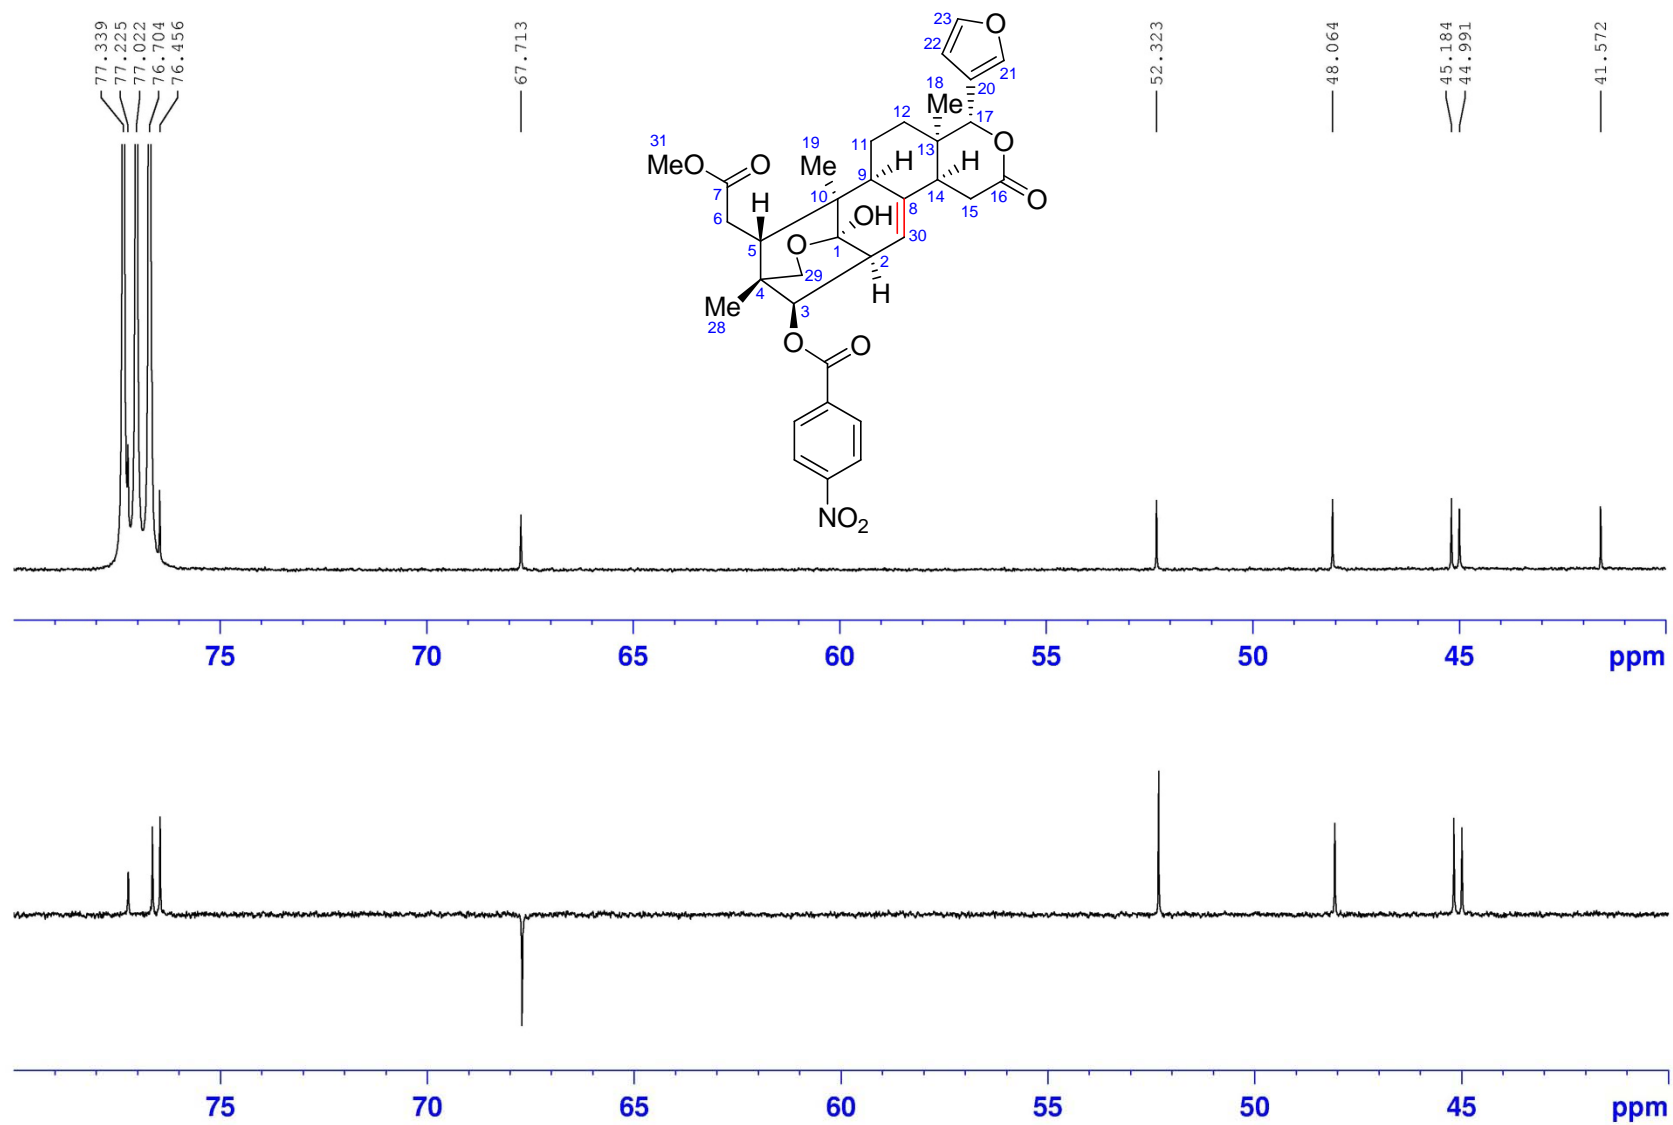

# DEPT 135 spectrum of **8d** in CDCl<sub>3</sub>

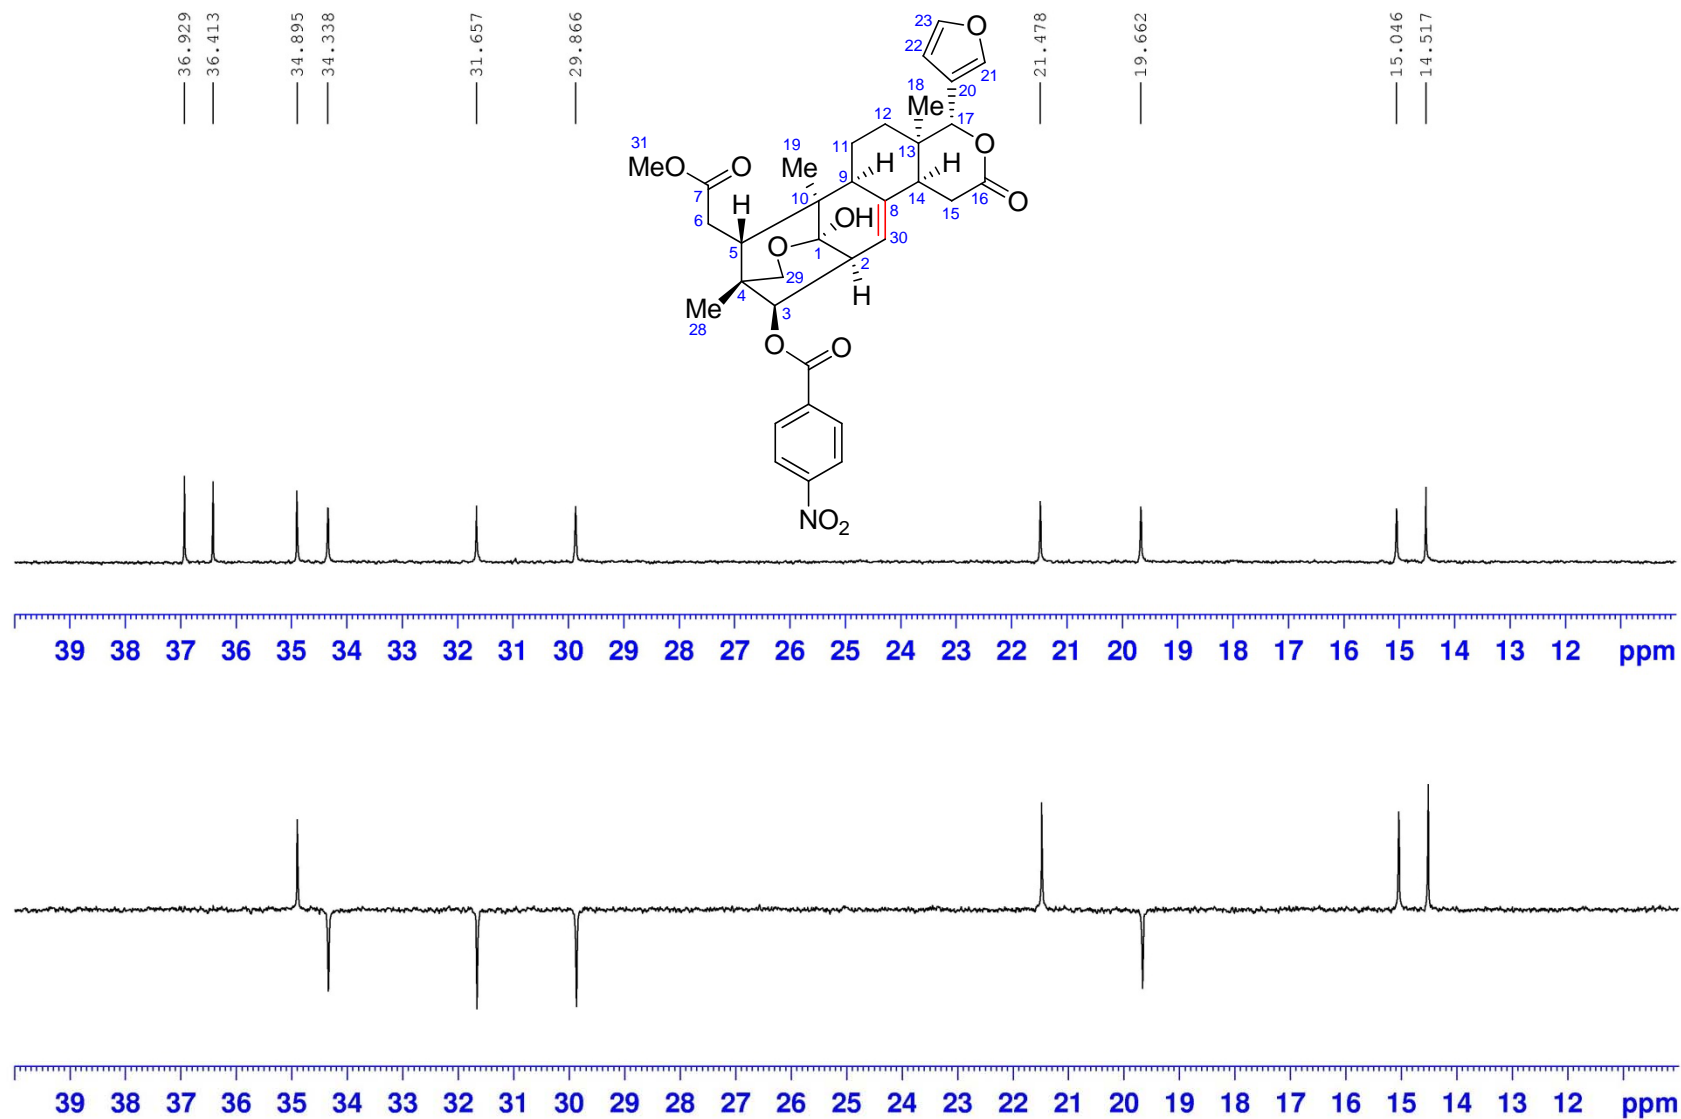

# HR-ESIMS for compound **8e**

## Generic Display Report

### Analysis Info

Analysis Name D:\Data\MS\data\201809\liwanshan\_WSD-70\_pos\_16\_01\_5577.d  
Method LC\_Direct Infusion\_pos\_100-1000mz.m  
Sample Name liwanshan\_WSD-70\_pos  
Comment

Acquisition Date 9/30/2018 6:12:23 PM

Operator SCSIO

Instrument maXis

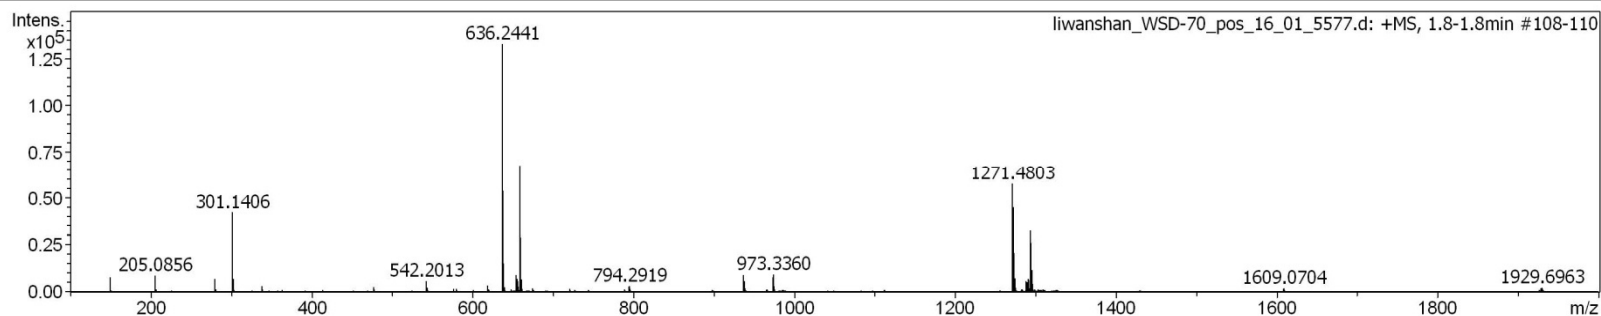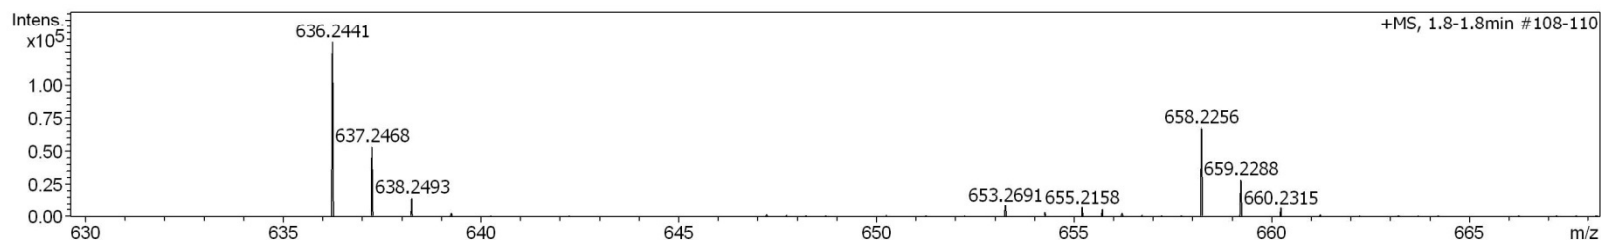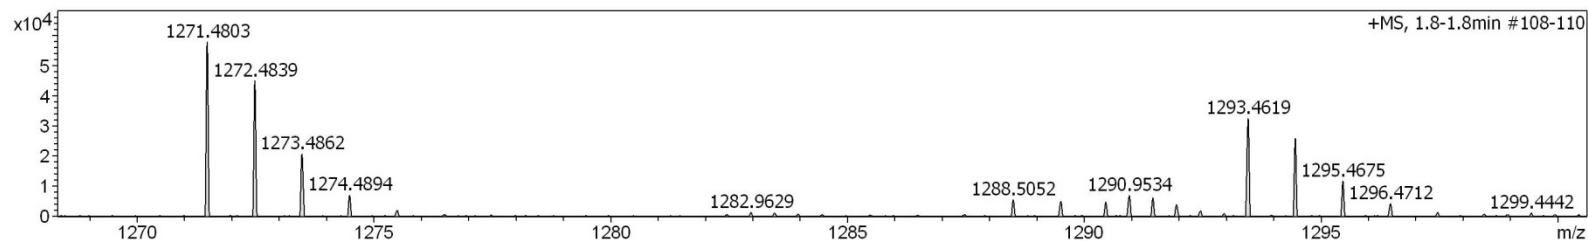



# HR-ESIMS for compound **8e**

## Mass Spectrum SmartFormula Report

### Analysis Info

Analysis Name D:\Data\MS\data\201809\liwanshan\_WSD-70\_pos\_16\_01\_5577.d  
 Method LC\_Direct Infusion\_pos\_100-1000mz.m  
 Sample Name liwanshan\_WSD-70\_pos  
 Comment

Acquisition Date 9/30/2018 6:12:23 PM  
 Operator SCSIO  
 Instrument maXis 255552.00029

### Acquisition Parameter

|             |          |                      |          |                  |           |
|-------------|----------|----------------------|----------|------------------|-----------|
| Source Type | ESI      | Ion Polarity         | Positive | Set Nebulizer    | 0.4 Bar   |
| Focus       | Active   | Set Capillary        | 4500 V   | Set Dry Heater   | 180 °C    |
| Scan Begin  | 100 m/z  | Set End Plate Offset | -500 V   | Set Dry Gas      | 4.0 l/min |
| Scan End    | 2000 m/z | Set Charging Voltage | 0 V      | Set Divert Valve | Waste     |
|             |          | Set Corona           | 0 nA     | Set APCI Heater  | 0 °C      |

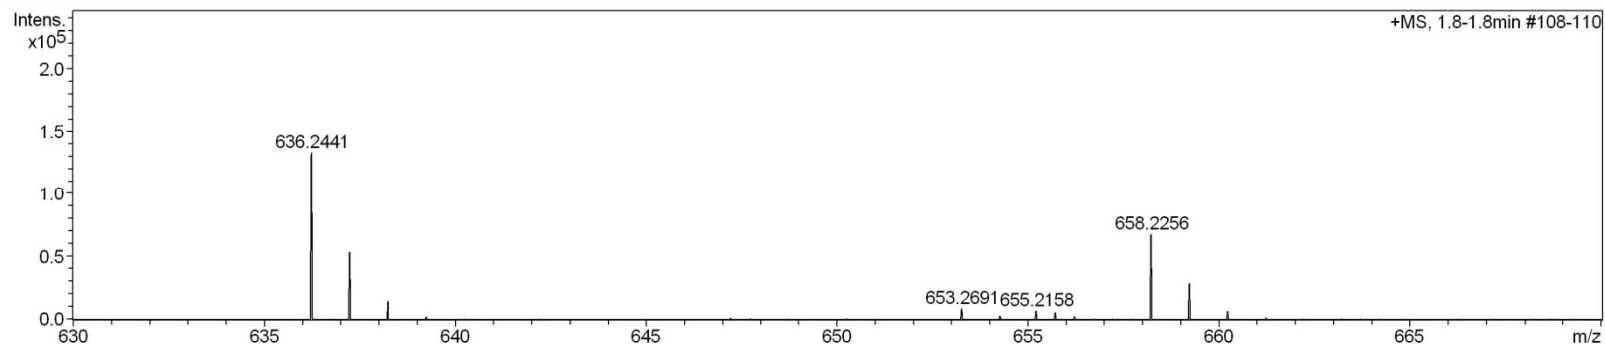

| Meas. m/z | # | Ion Formula                                                      | Score  | m/z       | err [ppm] | err [mDa] | mSigma | rdb  | e <sup>-</sup> Conf | N-Rule |
|-----------|---|------------------------------------------------------------------|--------|-----------|-----------|-----------|--------|------|---------------------|--------|
| 636.2441  | 1 | C <sub>34</sub> H <sub>38</sub> NO <sub>11</sub>                 | 100.00 | 636.2439  | 0.3       | 0.2       | 16.1   | 16.5 | even                | ok     |
| 658.2256  | 1 | C <sub>34</sub> H <sub>37</sub> NNaO <sub>11</sub>               | 100.00 | 658.2259  | 0.5       | 0.3       | 22.4   | 16.5 | even                | ok     |
| 1271.4803 | 1 | C <sub>68</sub> H <sub>75</sub> N <sub>2</sub> O <sub>22</sub>   | 100.00 | 1271.4806 | -0.2      | -0.3      | 15.4   | 32.5 | even                | ok     |
| 1293.4619 | 1 | C <sub>68</sub> H <sub>74</sub> N <sub>2</sub> NaO <sub>22</sub> | 100.00 | 1293.4625 | -0.5      | -0.7      | 23.2   | 32.5 | even                | ok     |

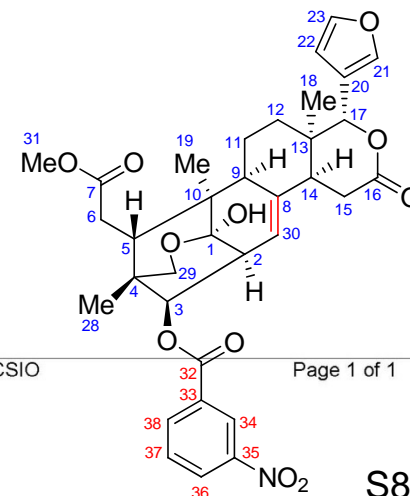

liwanshan\_WSD-70\_pos\_16\_01\_5577.d  
 Bruker Compass DataAnalysis 4.1

printed: 9/30/2018 6:27:25 PM

by: SCSIO

Page 1 of 1

**S83**

<sup>1</sup>H NMR (400 MHz) spectrum of **8e** in CDCl<sub>3</sub>

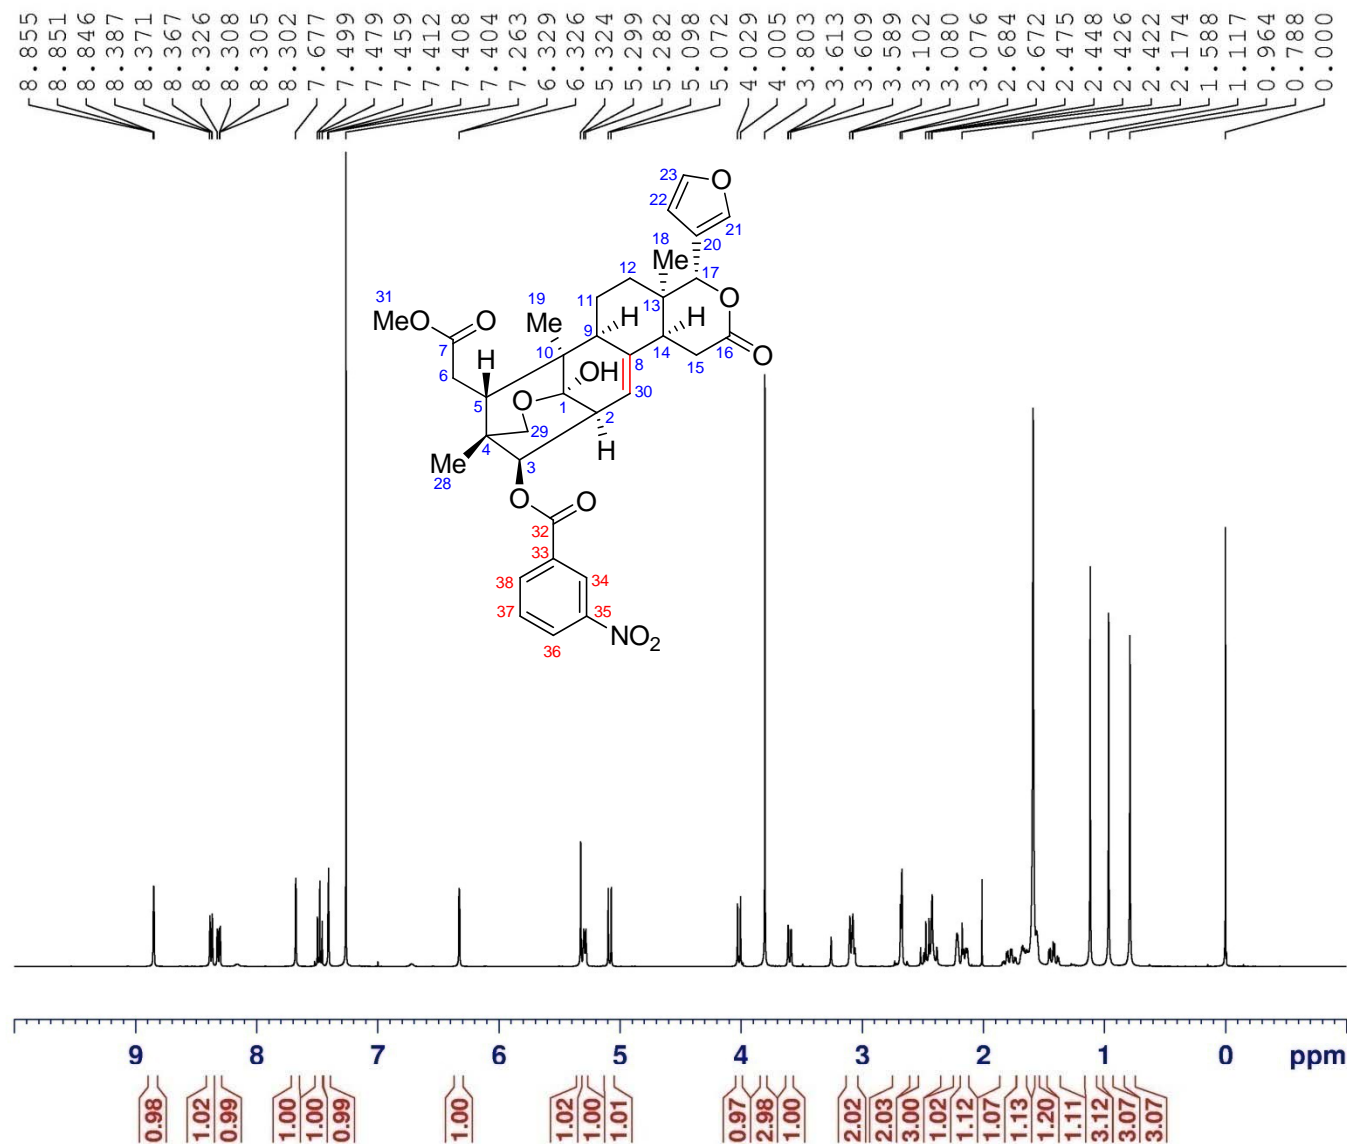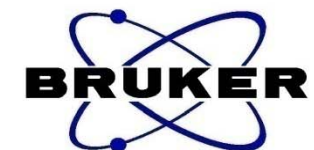

```

NAME      czc-1-CH3-jianxiao
EXPNO     1
PROCNO    1
Date_     20171016
Time      15.25
INSTRUM   spect
PROBHD    5 mm CPMBO BB
PULPROG   zg30
TD        65536
SOLVENT   CDCl3
NS         16
DS         2
SWH        8223.685 Hz
FIDRES     0.125483 Hz
AQ         3.9846387 sec
RG         208.5
DW         60.800 usec
DE         10.00 usec
TE         297.0 K
D1         1.00000000 sec
TD0        1
    
```

```

===== CHANNEL f1 =====
SFO1      400.1324710 MHz
NUC1      1H
P1        11.50 usec
SI        65536
SF        400.1300083 MHz
WDW        EM
SSB        0
LB         0.30 Hz
GB         0
PC         1.00
    
```

$^1\text{H}$  NMR (400 MHz) spectrum of **8e** in  $\text{CDCl}_3$ 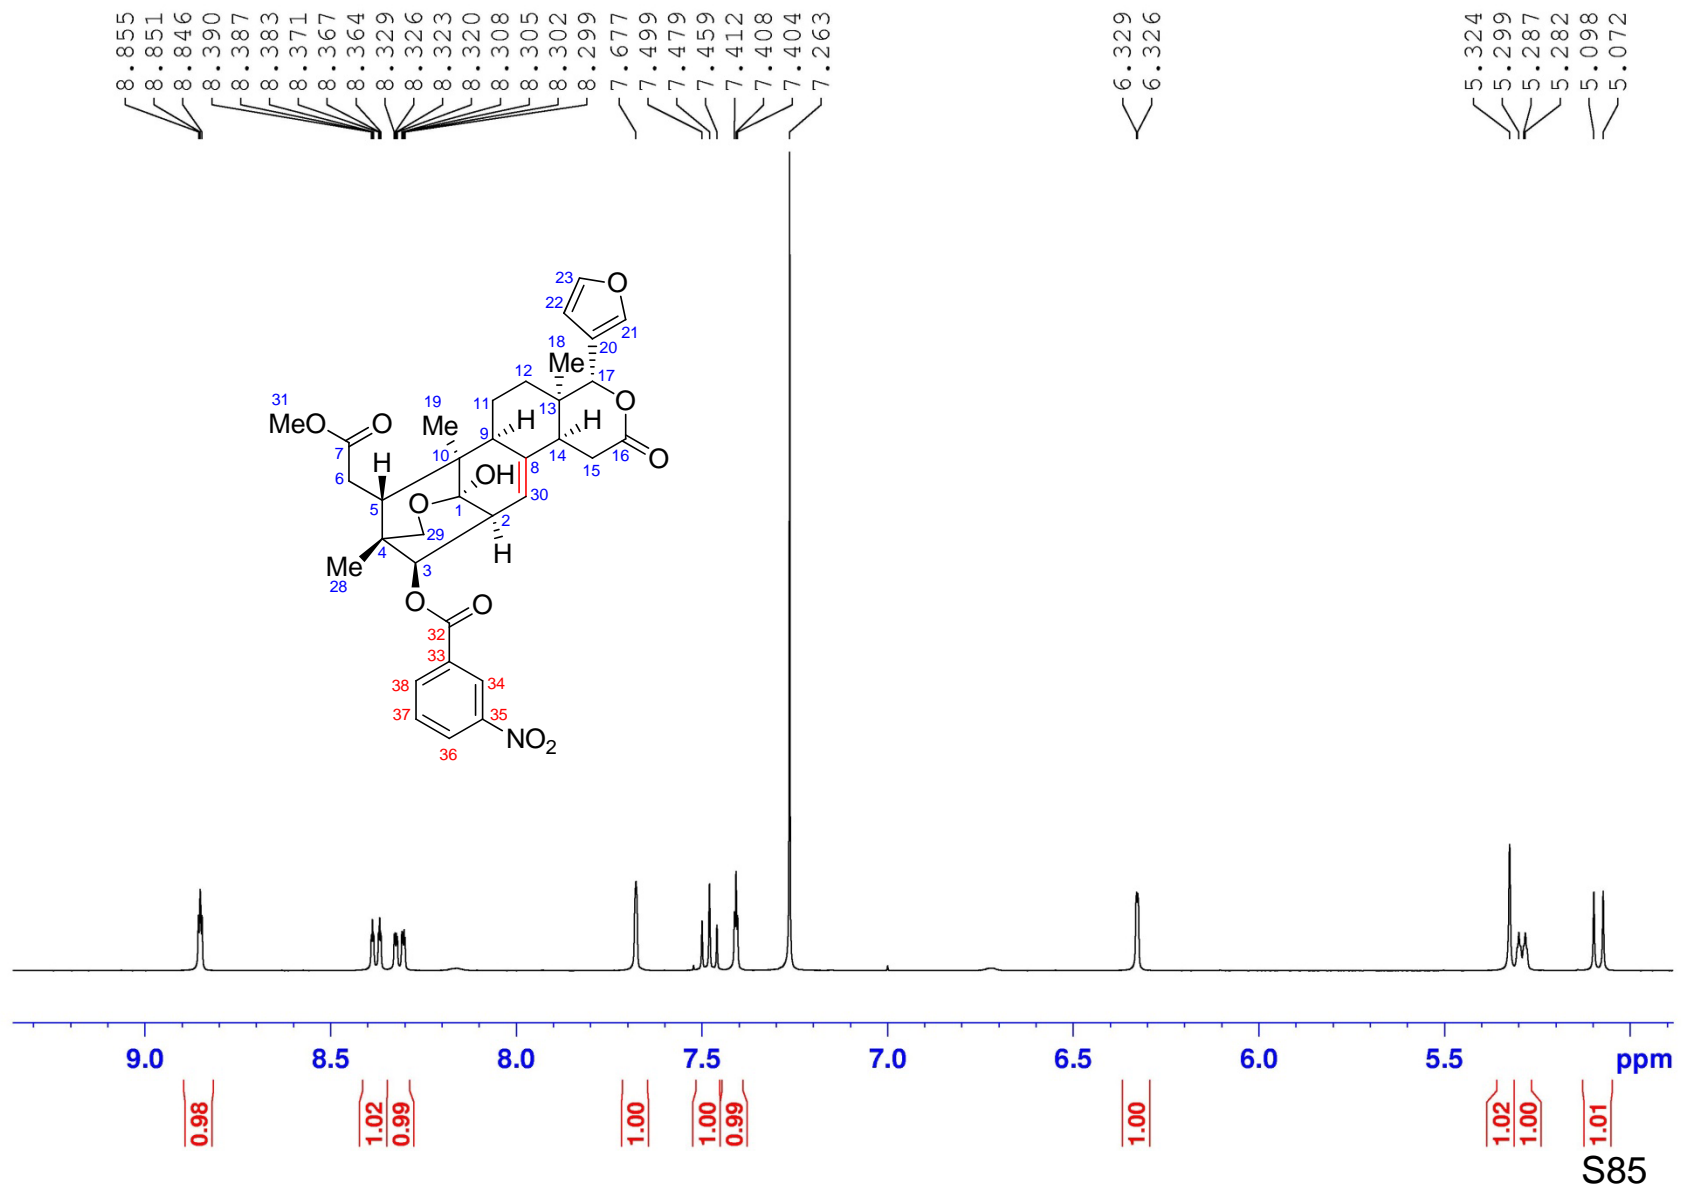

$^1\text{H}$  NMR (400 MHz) spectrum of **8e** in  $\text{CDCl}_3$

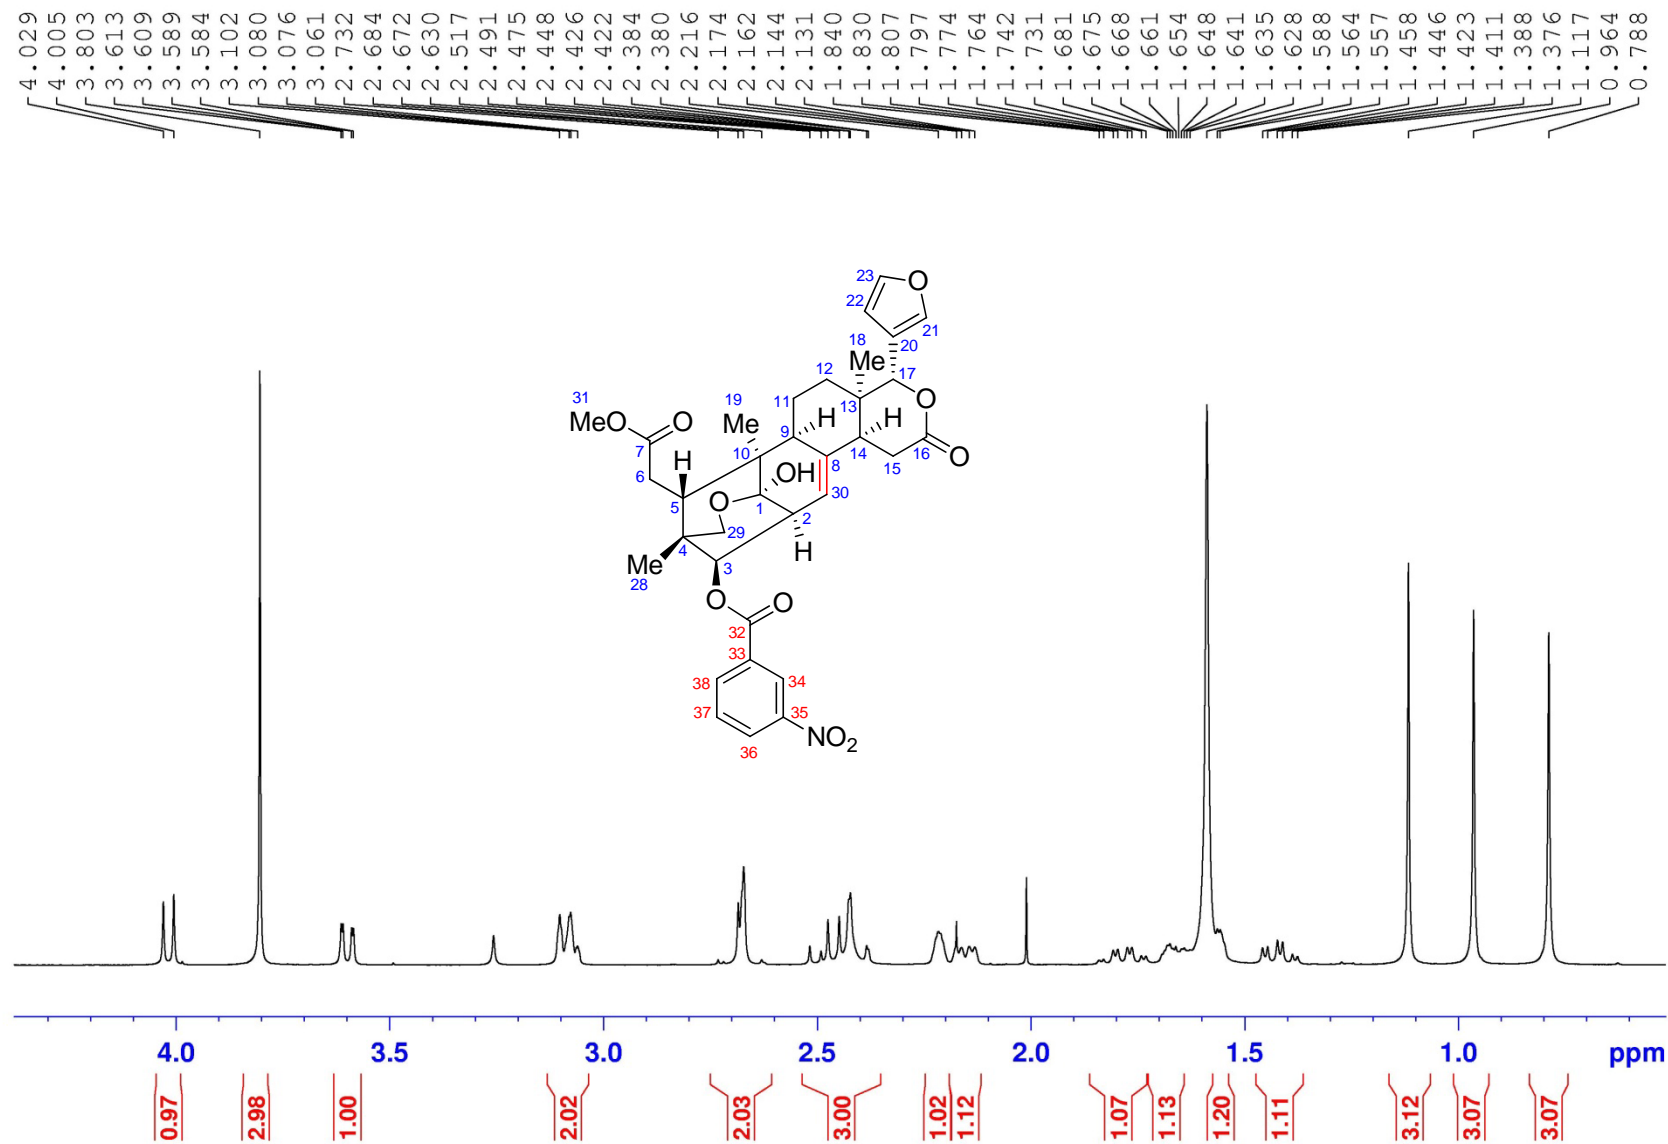

$^{13}\text{C}$  NMR (100 MHz) spectrum of **8e** in  $\text{CDCl}_3$

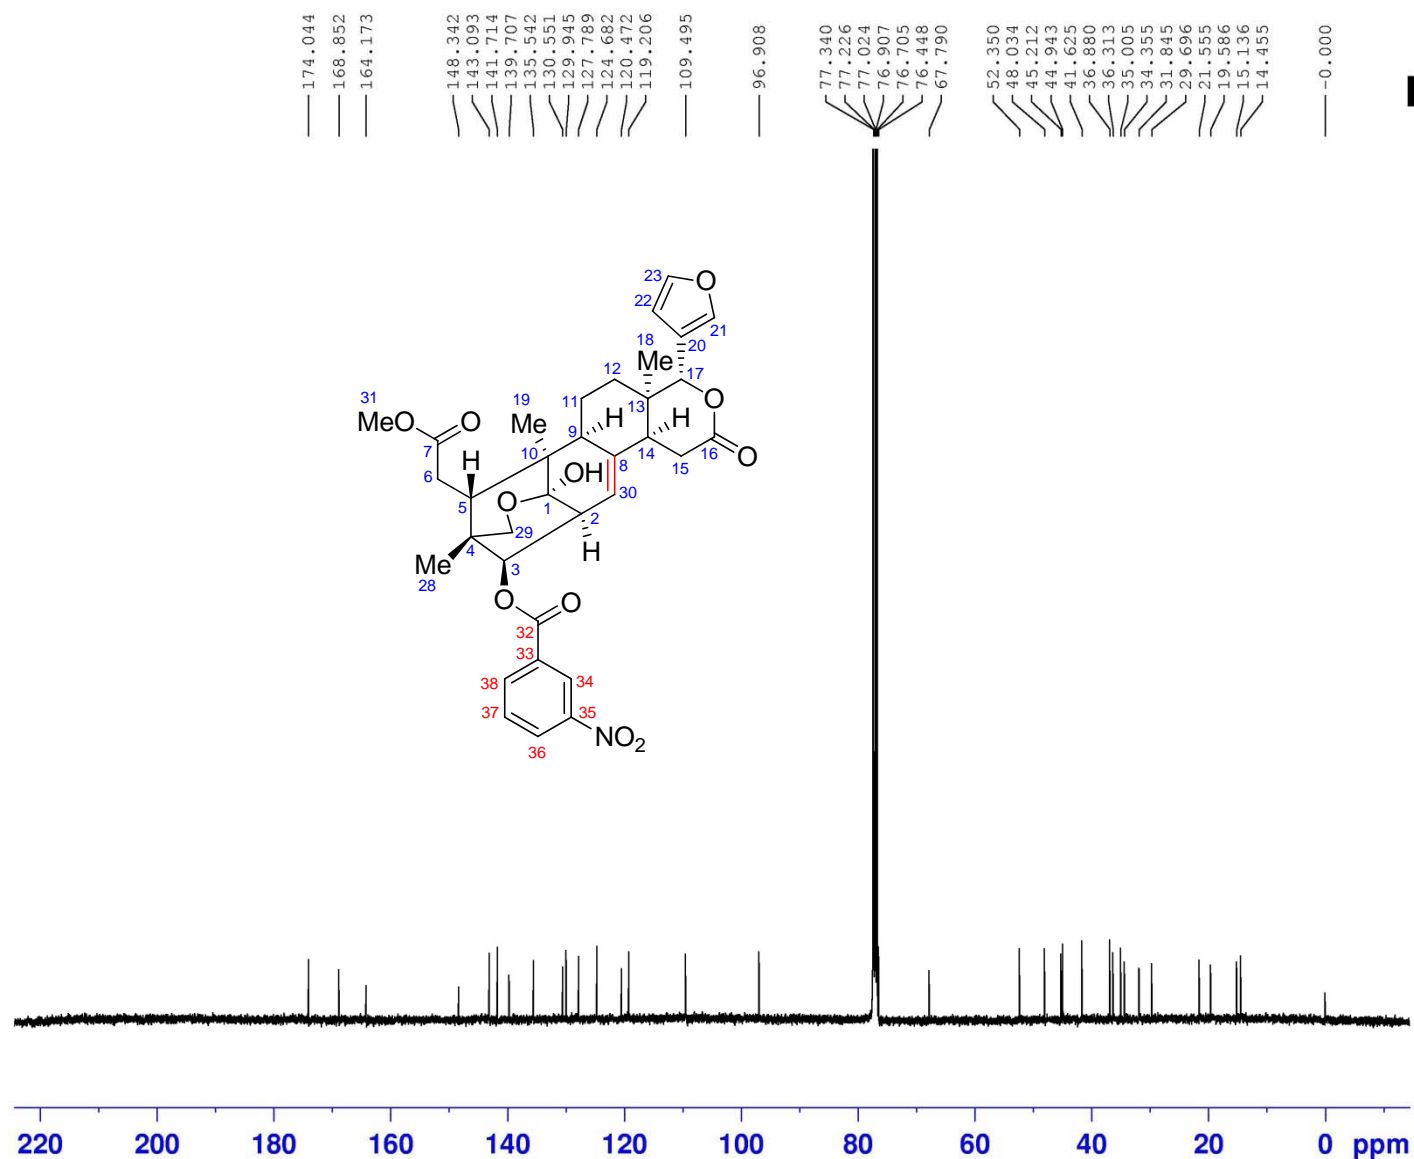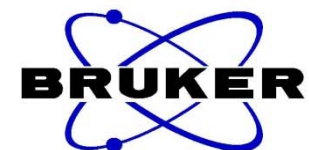

NAME czc-1-CH3-jianxi:  
 EXPNO 102  
 PROCNO 1  
 Date\_ 20171016  
 Time 20.11  
 INSTRUM spect  
 PROBHD 5 mm CFPBBO BB  
 PULPROG zgpg30  
 TD 65536  
 SOLVENT CDCl3  
 NS 1024  
 DS 4  
 SWH 24038.461 H:  
 FIDRES 0.366798 H:  
 AQ 1.3631988 s  
 RG 130.26  
 DW 20.800 u:  
 DE 18.00 u:  
 TE 297.0 K  
 D1 2.00000000 s  
 D11 0.03000000 s  
 TD0 1

===== CHANNEL f1 =====  
 SF01 100.6233324 MHz  
 NUC1  $^{13}\text{C}$   
 P1 10.00 u:  
 SI 32768  
 SF 100.6127690 MHz  
 WDW EM  
 SSB 0  
 LB 1.00 H:  
 GB 0  
 PC 1.40

$^{13}\text{C}$  NMR (100 MHz) spectrum of **8e** in  $\text{CDCl}_3$

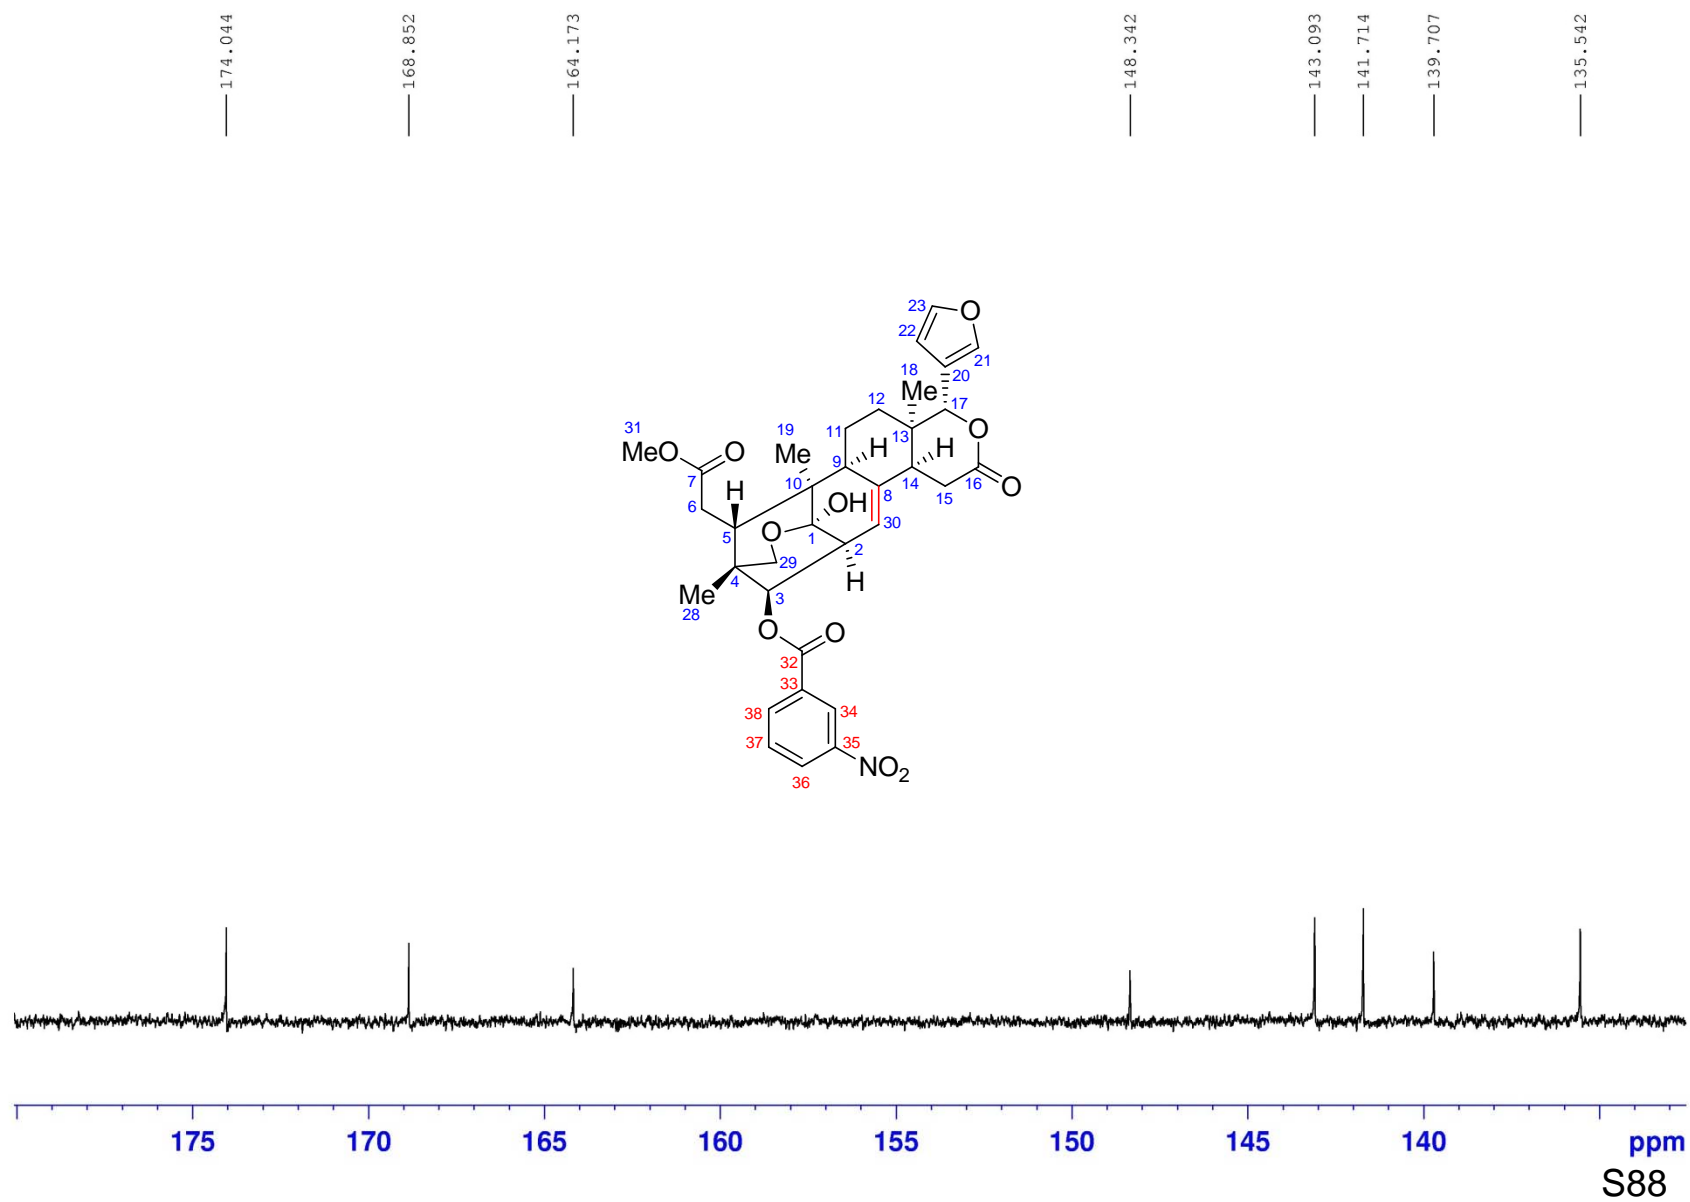

<sup>13</sup>C NMR (100 MHz) spectrum of **8e** in CDCl<sub>3</sub>

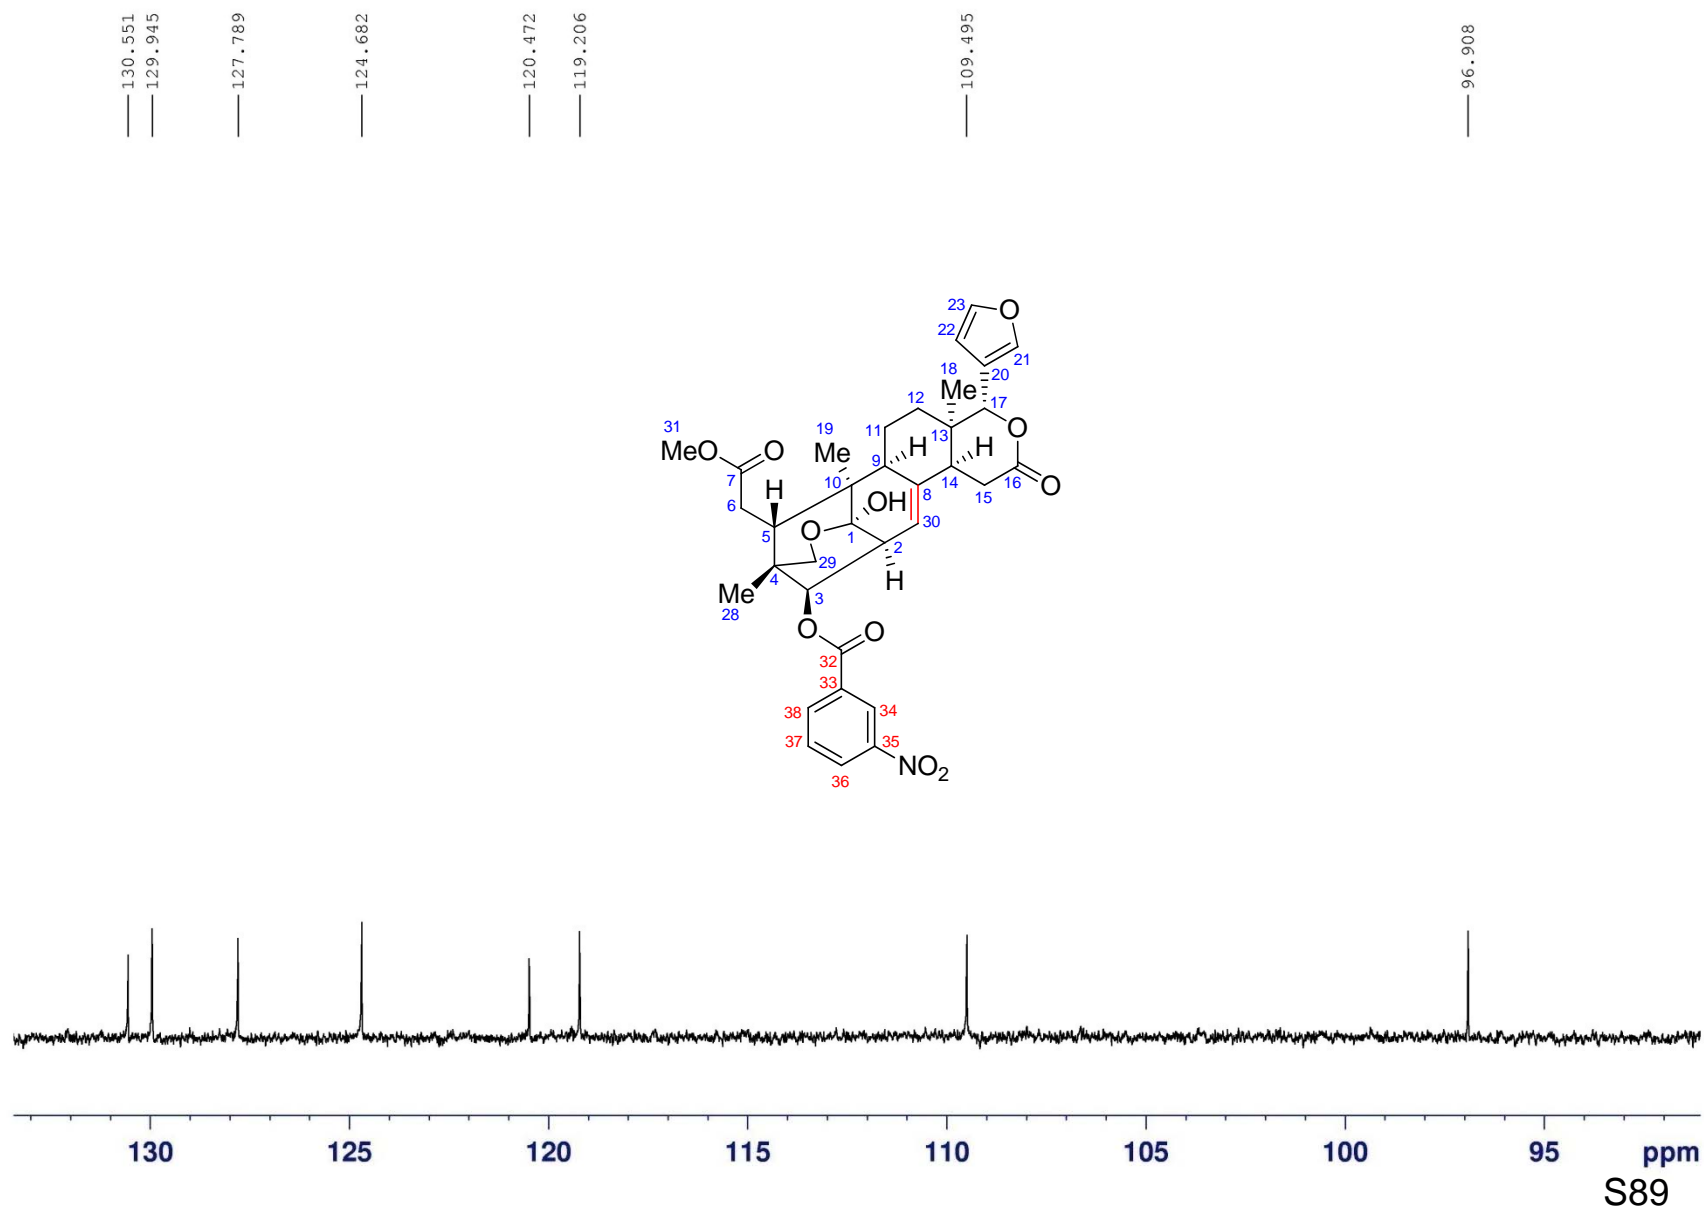

$^{13}\text{C}$  NMR (100 MHz) spectrum of **8e** in  $\text{CDCl}_3$

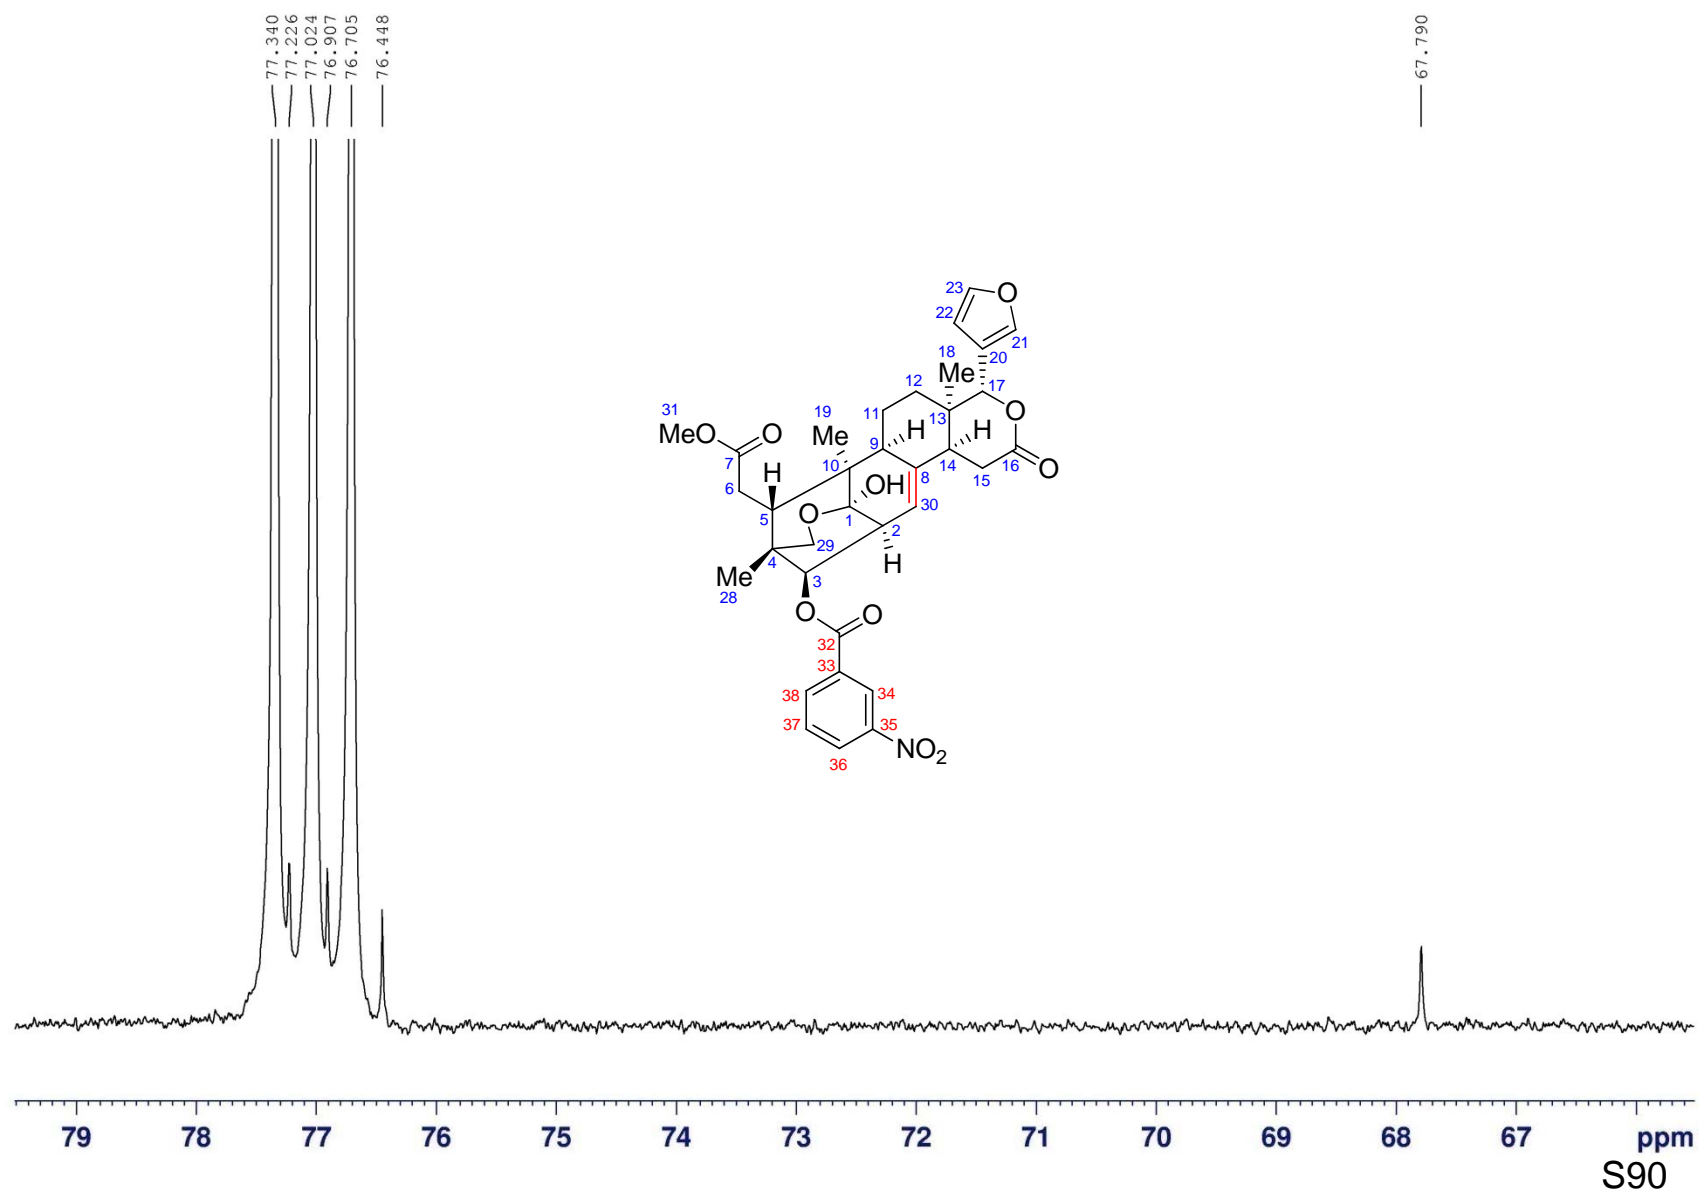



$^{13}\text{C}$  NMR (100 MHz) spectrum of **8e** in  $\text{CDCl}_3$

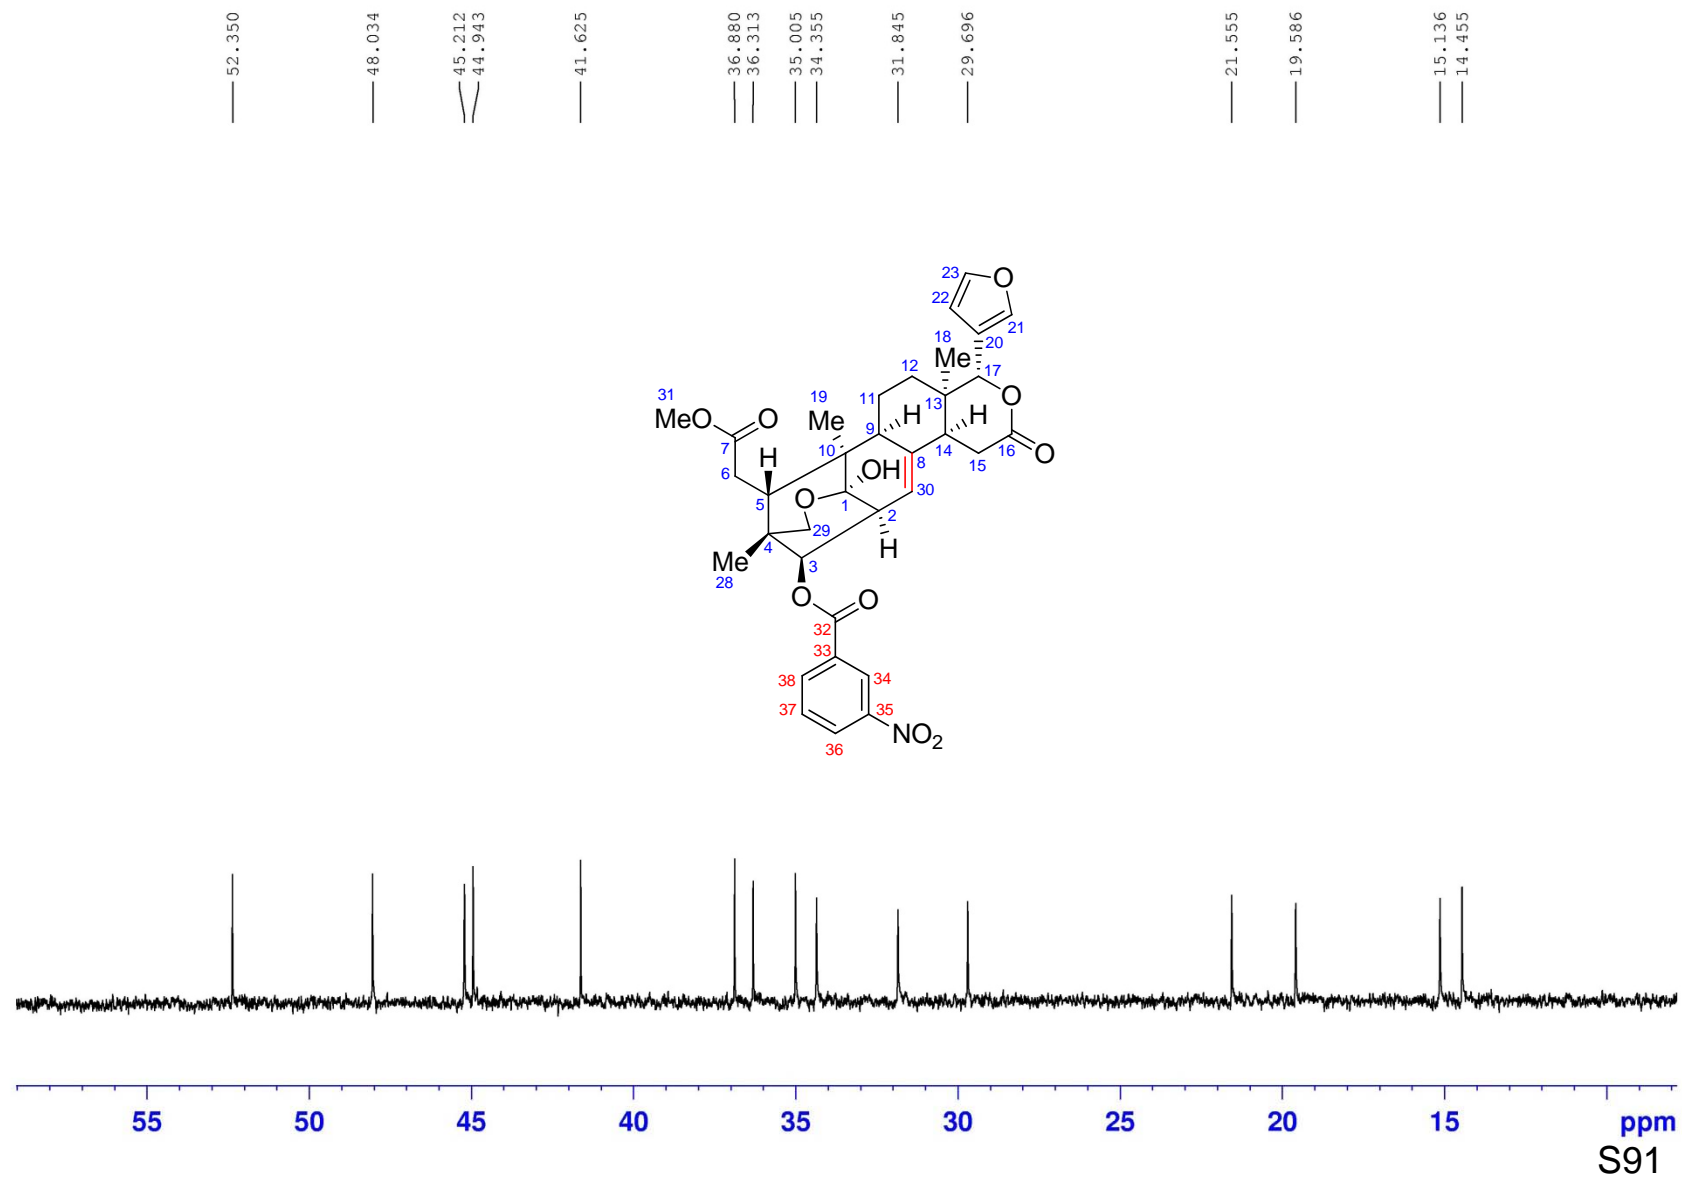

# DEPT 135 spectrum of **8e** in CDCl<sub>3</sub>

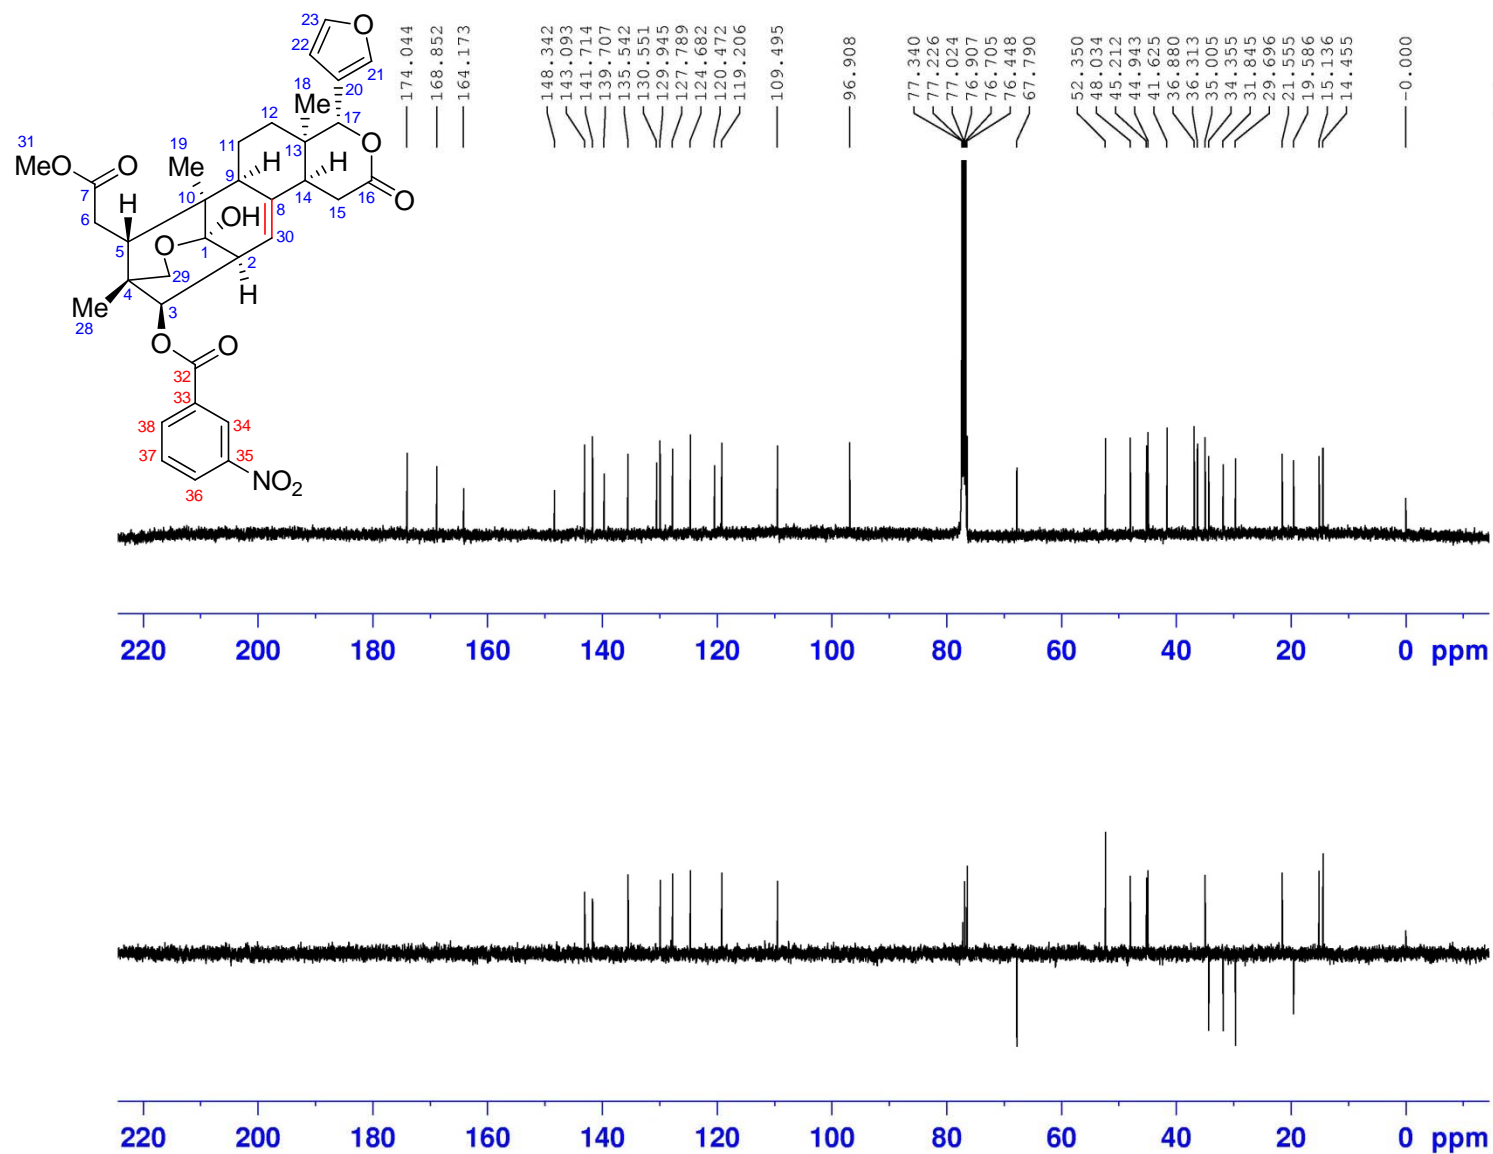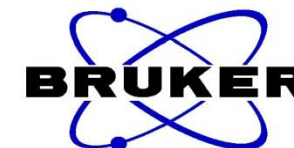

```

NAME      czc-1-CH3-jianx:
EXPNO      3
PROCNO     1
Date_      20171016
Time       19.06
INSTRUM    spect
PROBHD     5 mm CPPBBO BB
PULPROG    depts135
TD         65536
SOLVENT    CDCl3
NS         300
DS         4
SWH        24038.461 MHz
FIDRES     0.366798 MHz
AQ         1.3631988 sec
RG         73.92
DW         20.800 nsec
DE         18.00 nsec
TE         297.0 K
CNST2      145.0000000
D1         2.00000000 sec
D2         0.00344828 sec
D12        0.00002000 sec
TD0        1
    
```

```

===== CHANNEL f1 =====
SFO1      100.6233324 MHz
NUC1       13C
P1        10.00 nsec
P13       2000.00 nsec
SI        32768
SF        100.6127692 MHz
WDW       EM
SSB       0
LB        1.00 MHz
GB        0
PC        1.40
    
```

# DEPT 135 spectrum of **8e** in CDCl<sub>3</sub>

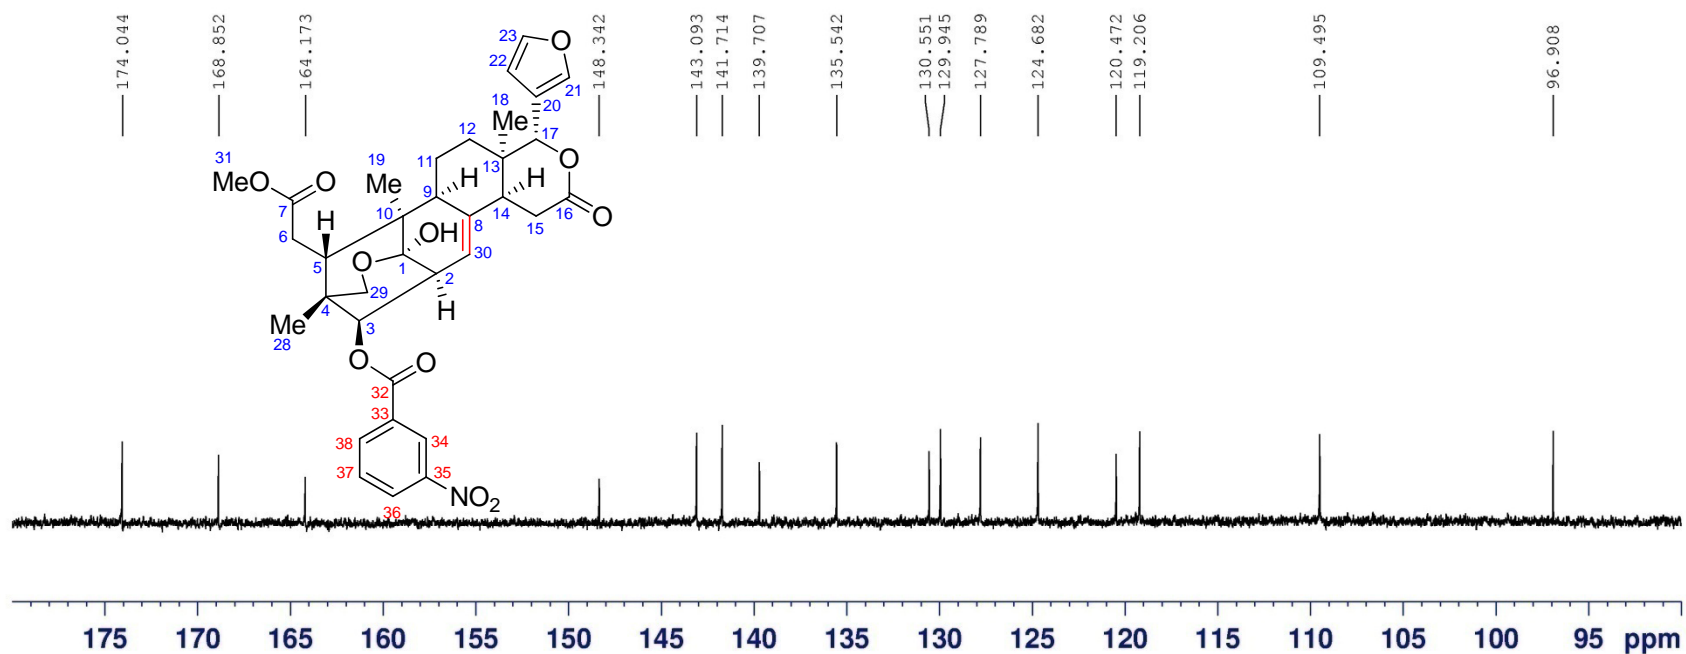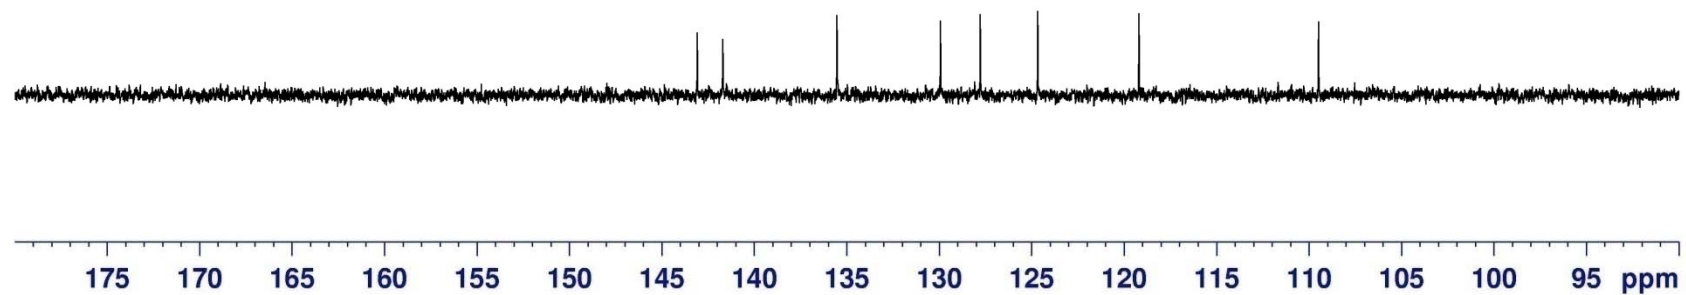

DEPT 135 spectrum of **8e** in CDCl<sub>3</sub>

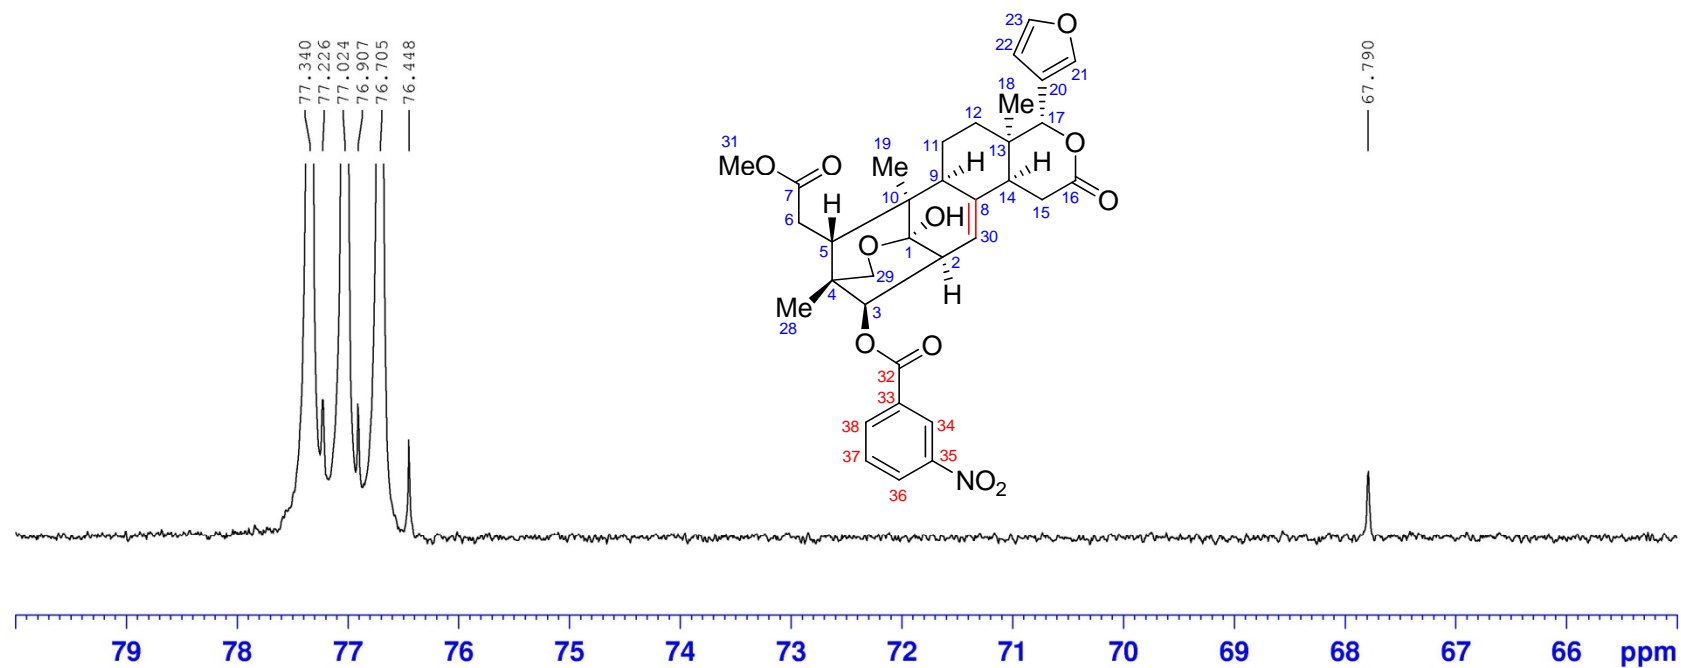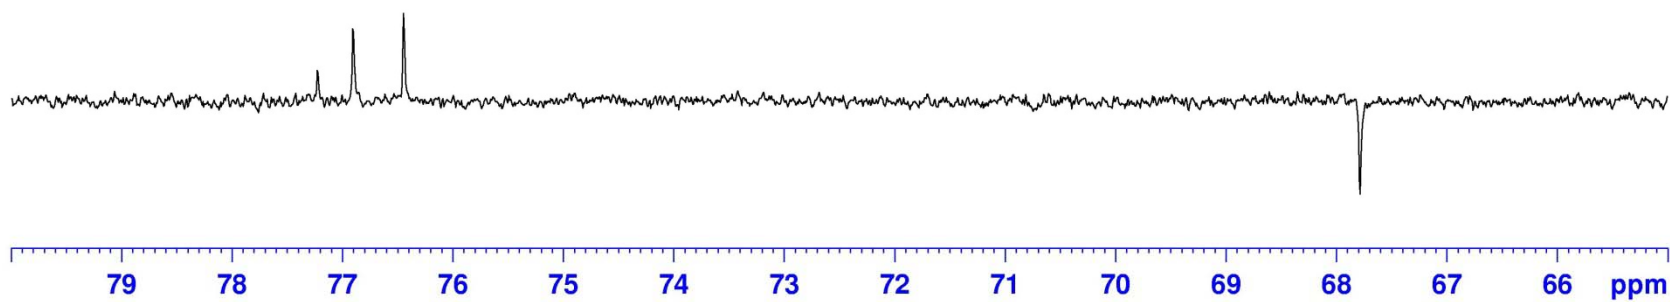

# DEPT 135 spectrum of **8e** in CDCl<sub>3</sub>

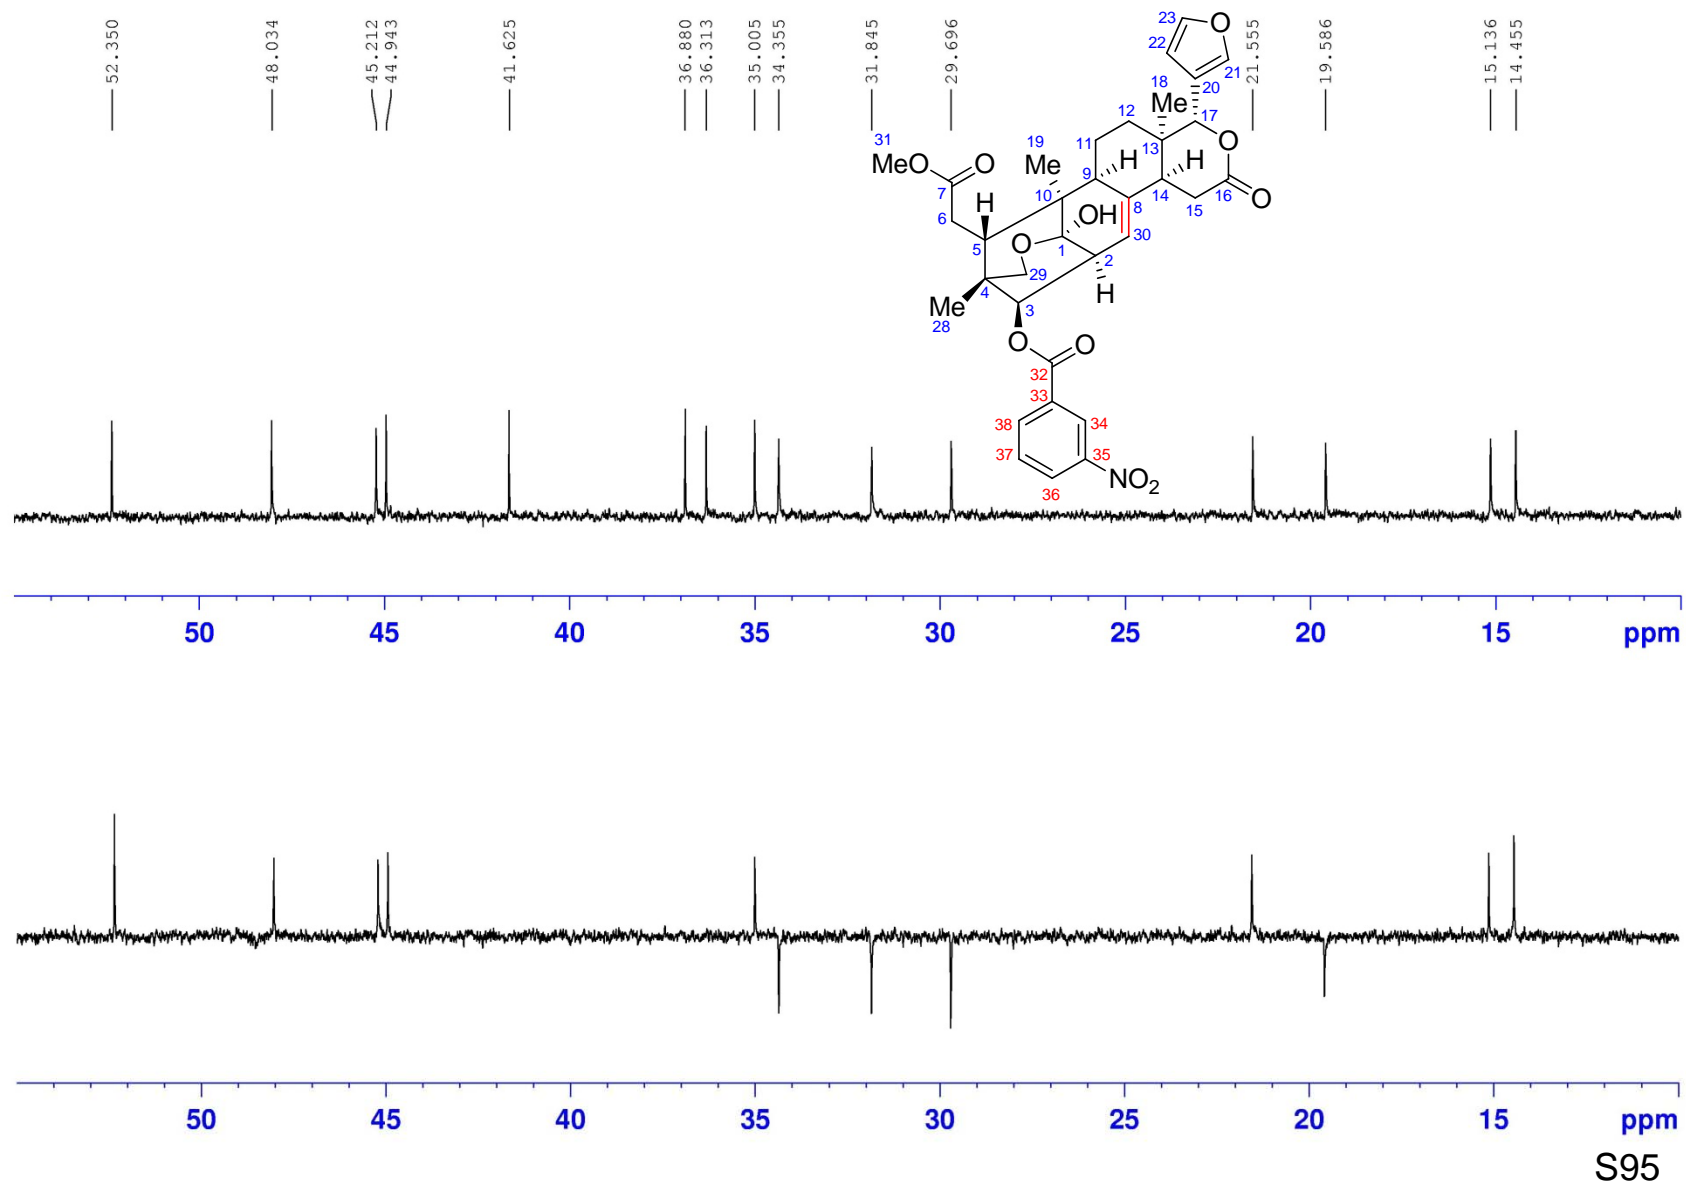

# HR-ESIMS for compound **8f**

## Generic Display Report

### Analysis Info

Analysis Name D:\Data\MS\data\201809\liwanshan\_WSD-71\_pos\_17\_01\_5578.d  
Method LC\_Direct Infusion\_pos\_100-1000mz.m  
Sample Name liwanshan\_WSD-71\_pos  
Comment

Acquisition Date 9/30/2018 6:15:53 PM

Operator SCSIO

Instrument maXis

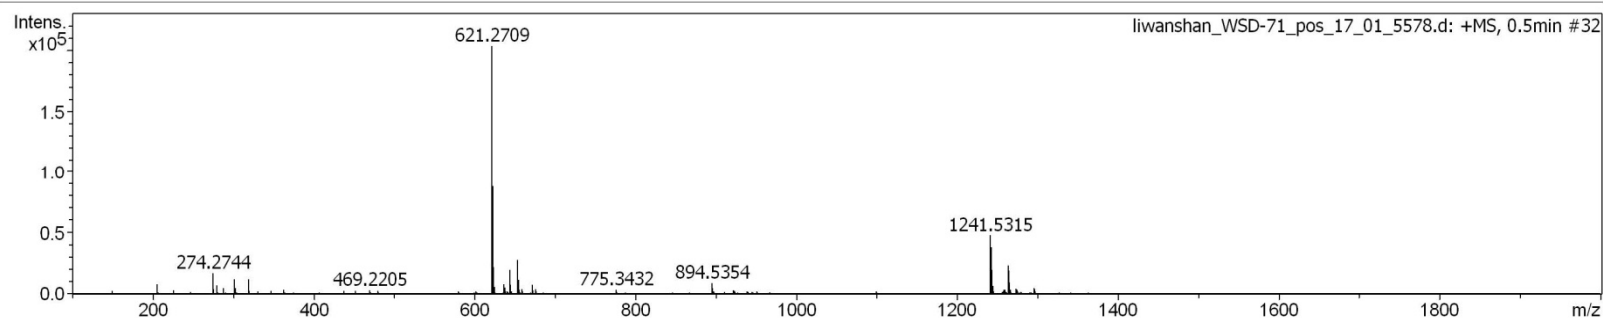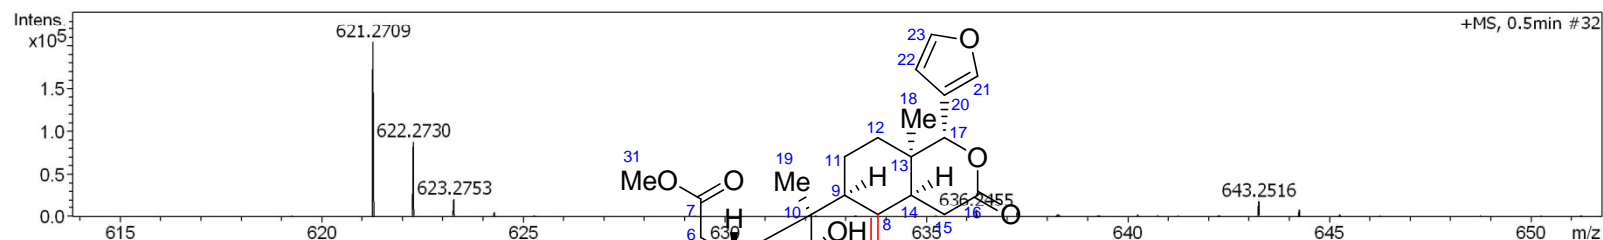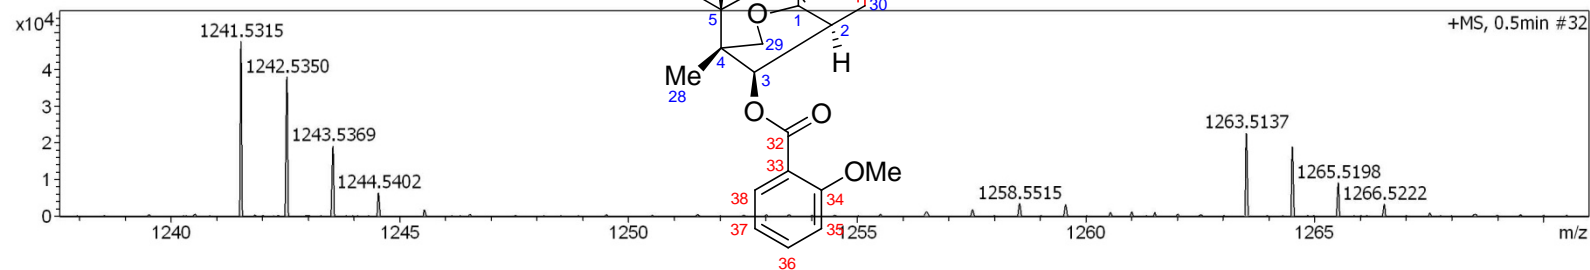

# HR-ESIMS for compound **8f**

## Mass Spectrum SmartFormula Report

### Analysis Info

Analysis Name D:\Data\MS\data\201809\liwanshan\_WSD-71\_pos\_17\_01\_5578.d  
 Method LC\_Direct Infusion\_pos\_100-1000mz.m  
 Sample Name liwanshan\_WSD-71\_pos  
 Comment

Acquisition Date 9/30/2018 6:15:53 PM  
 Operator SCSIO  
 Instrument maXis 255552.00029

### Acquisition Parameter

|             |          |                      |          |                  |           |
|-------------|----------|----------------------|----------|------------------|-----------|
| Source Type | ESI      | Ion Polarity         | Positive | Set Nebulizer    | 0.4 Bar   |
| Focus       | Active   | Set Capillary        | 4500 V   | Set Dry Heater   | 180 °C    |
| Scan Begin  | 100 m/z  | Set End Plate Offset | -500 V   | Set Dry Gas      | 4.0 l/min |
| Scan End    | 2000 m/z | Set Charging Voltage | 0 V      | Set Divert Valve | Waste     |
|             |          | Set Corona           | 0 nA     | Set APCI Heater  | 0 °C      |

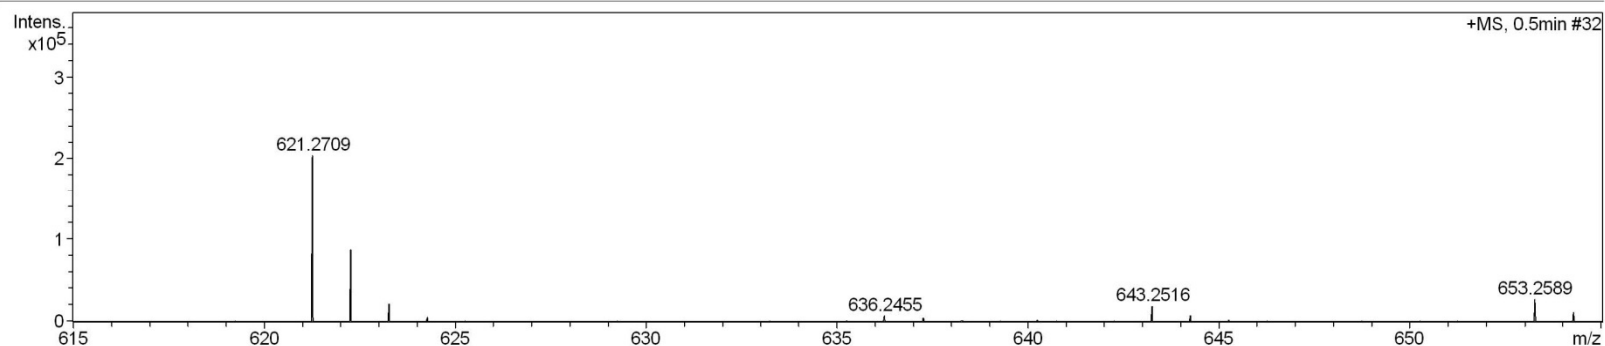

| Meas. m/z | # | Ion Formula | Score  | m/z       | err [ppm] | err [mDa] | mSigma | rdb  | e <sup>-</sup> Conf | N-Rule |
|-----------|---|-------------|--------|-----------|-----------|-----------|--------|------|---------------------|--------|
| 621.2709  | 1 | C35H41O10   | 100.00 | 621.2694  | 2.3       | 1.4       | 24.5   | 15.5 | even                | ok     |
| 643.2516  | 1 | C35H40NaO10 | 100.00 | 643.2514  | 0.4       | 0.2       | 8.1    | 15.5 | even                | ok     |
| 1241.5315 | 1 | C70H81O20   | 100.00 | 1241.5316 | 0.0       | 0.1       | 32.1   | 30.5 | even                | ok     |
| 1263.5137 | 1 | C70H80NaO20 | 100.00 | 1263.5135 | 0.2       | 0.2       | 39.2   | 30.5 | even                | ok     |

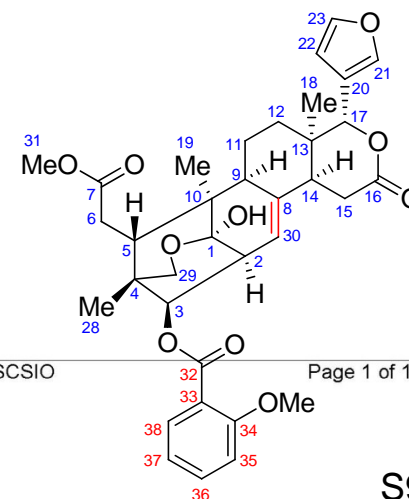

liwanshan\_WSD-71\_pos\_17\_01\_5578.d  
 Bruker Compass DataAnalysis 4.1

printed: 9/30/2018 6:31:46 PM

by: SCSIO

Page 1 of 1

S97

$^1\text{H}$  NMR (400 MHz) spectrum of **8f** in  $\text{CDCl}_3$

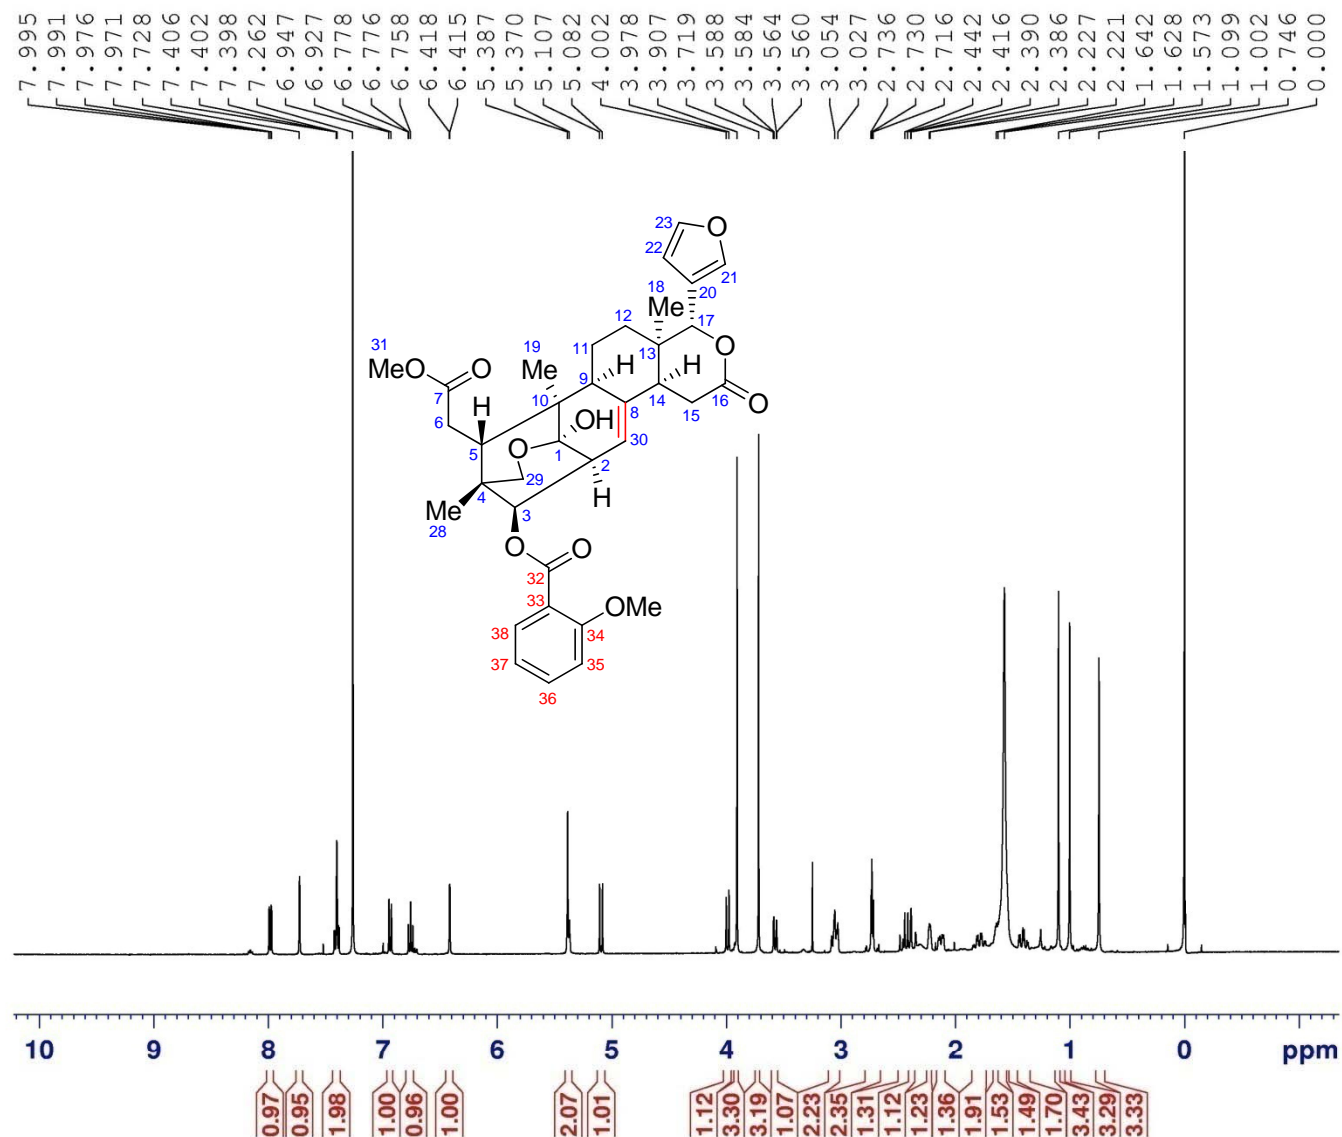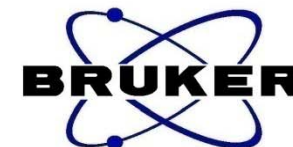

```

NAME      czc-1-CH3-LINJIAYANG
EXPNO     1
PROCNO    1
Date_     20171018
Time      12.16
INSTRUM   spect
PROBHD    5 mm CPBBO BB
PULPROG   zg30
TD         65536
SOLVENT   CDCl3
NS         16
DS         2
SWH        8223.685 Hz
FIDRES     0.125483 Hz
AQ         3.9846387 sec
RG         208.5
DW         60.800 usec
DE         10.00 usec
TE         297.0 K
D1         1.00000000 sec
D10        1
  
```

```

===== CHANNEL f1 =====
SFO1      400.1324710 MHz
NUC1       1H
P1         11.50 usec
SI         65536
SF         400.1300089 MHz
WDW        EM
SSB        0
LB         0.30 Hz
GB         0
PC         1.00
  
```



$^1\text{H}$  NMR (400 MHz) spectrum of **8f** in  $\text{CDCl}_3$

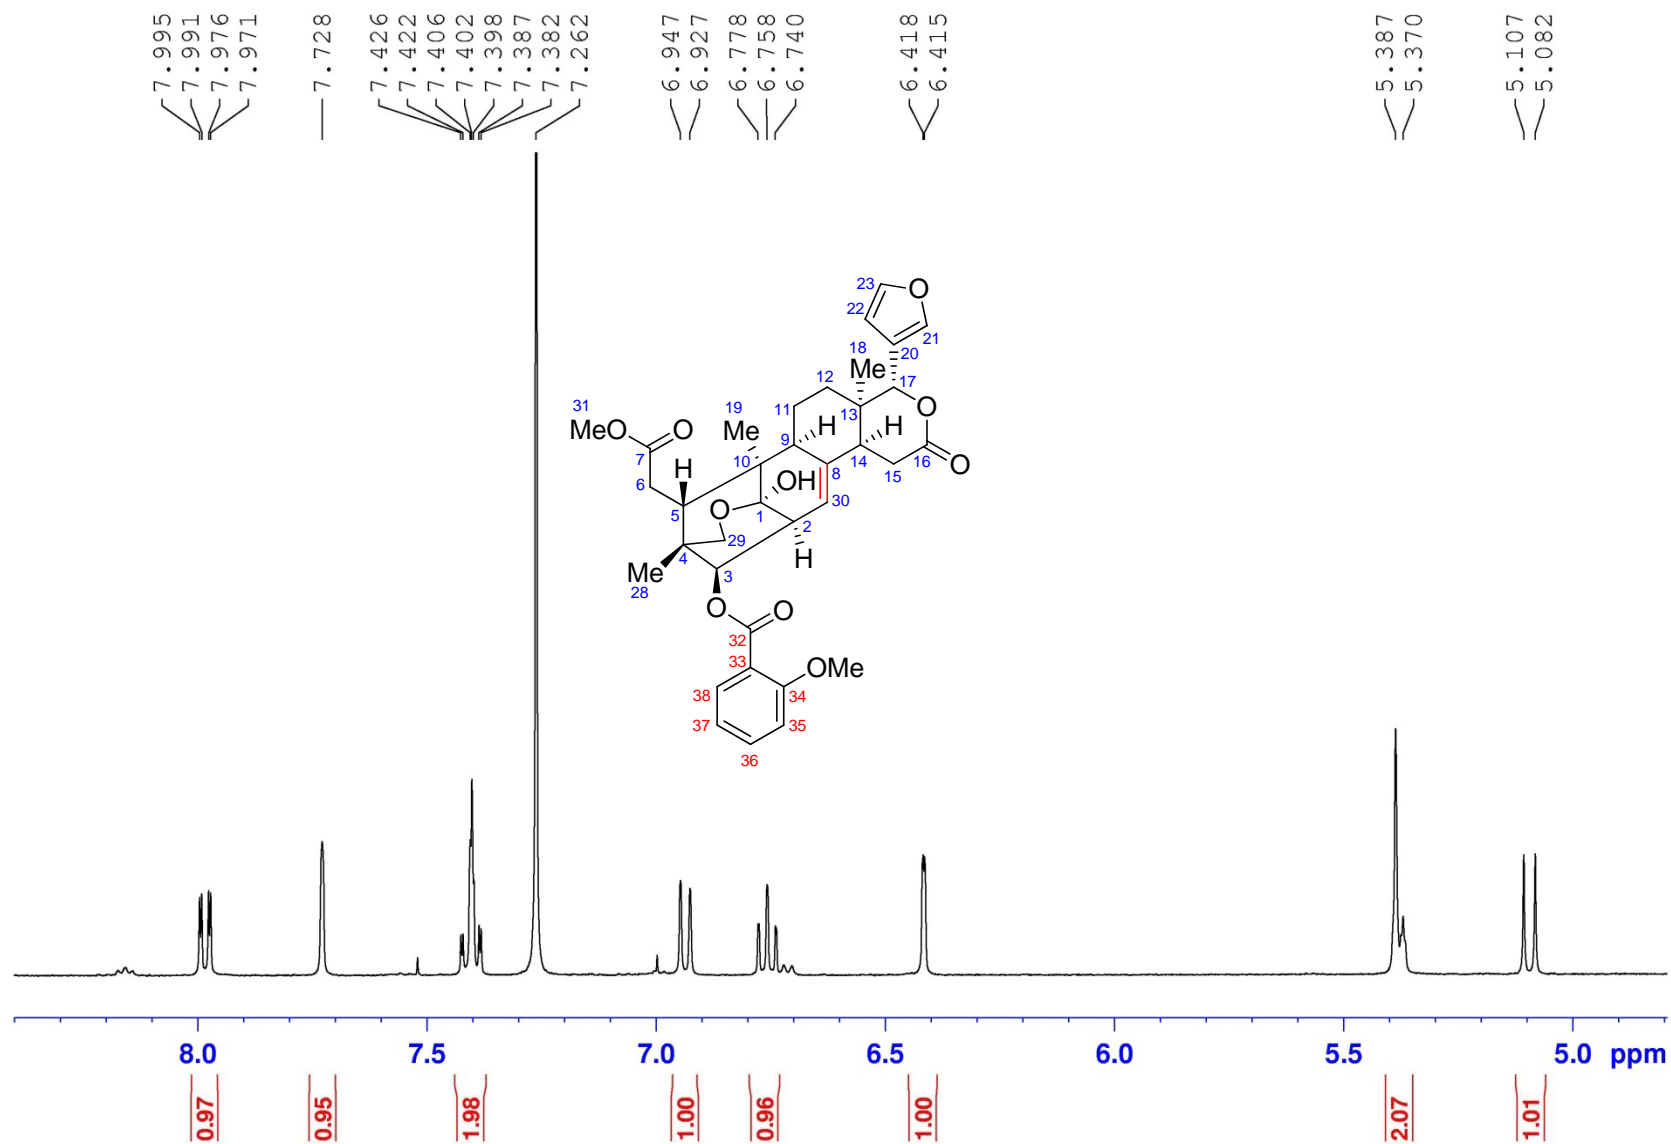

$^1\text{H}$  NMR (400 MHz) spectrum of **8f** in  $\text{CDCl}_3$

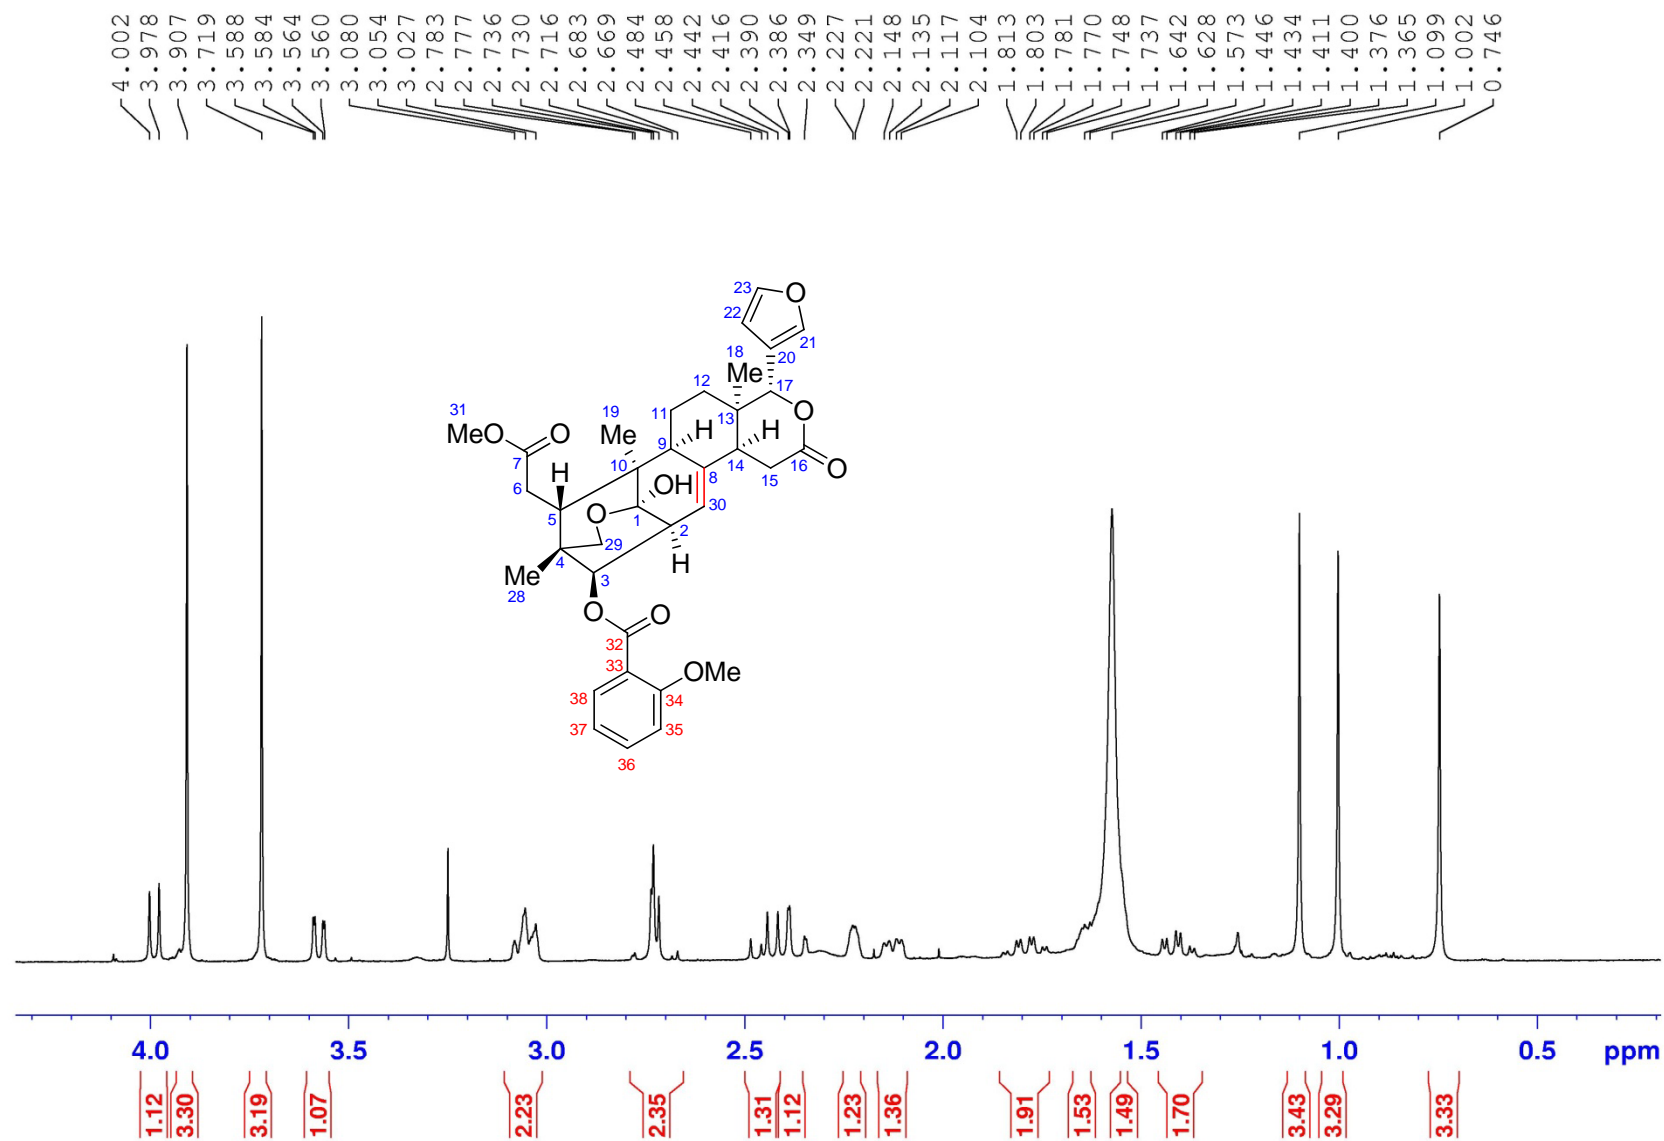

$^{13}\text{C}$  NMR (100 MHz) spectrum of **8f** in  $\text{CDCl}_3$

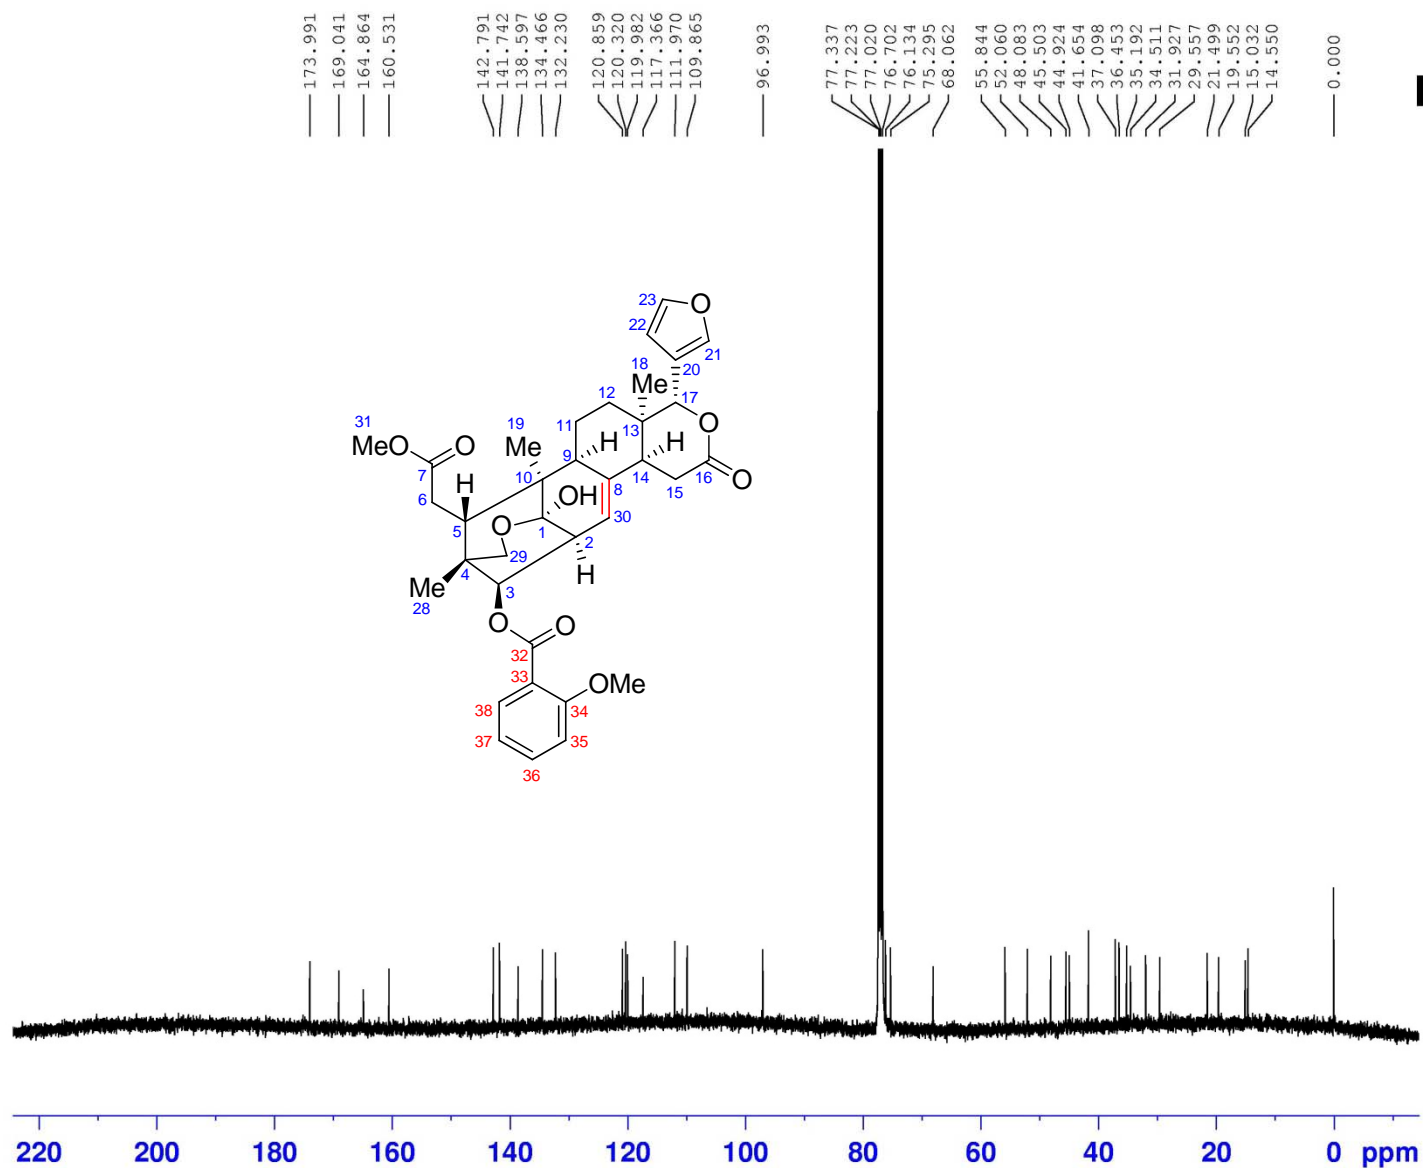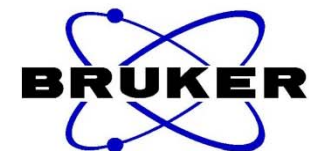

NAME czc-1-CH3-LINJIAYA  
 EXPNO 102  
 PROCNO 1  
 Date\_ 20171021  
 Time 14.09  
 INSTRUM spect  
 PROBHD 5 mm CPPBBO BB  
 PULPROG zgpg30  
 TD 65536  
 SOLVENT  $\text{CDCl}_3$   
 NS 3000  
 DS 4  
 SWH 24038.461 Hz  
 FIDRES 0.366798 Hz  
 AQ 1.3631988 sec  
 RG 147.94  
 DW 20.800 use  
 DE 18.00 use  
 TE 297.0 K  
 D1 2.00000000 sec  
 D11 0.03000000 sec  
 TD0 1

===== CHANNEL f1 =====  
 SFO1 100.6233324 MHz  
 NUC1  $^{13}\text{C}$   
 P1 10.00 use  
 SI 32768  
 SF 100.6127691 MHz  
 WDW EM  
 SSB 0  
 LB 1.00 Hz  
 GB 0  
 PC 1.40

$^{13}\text{C}$  NMR (100 MHz) spectrum of **8f** in  $\text{CDCl}_3$

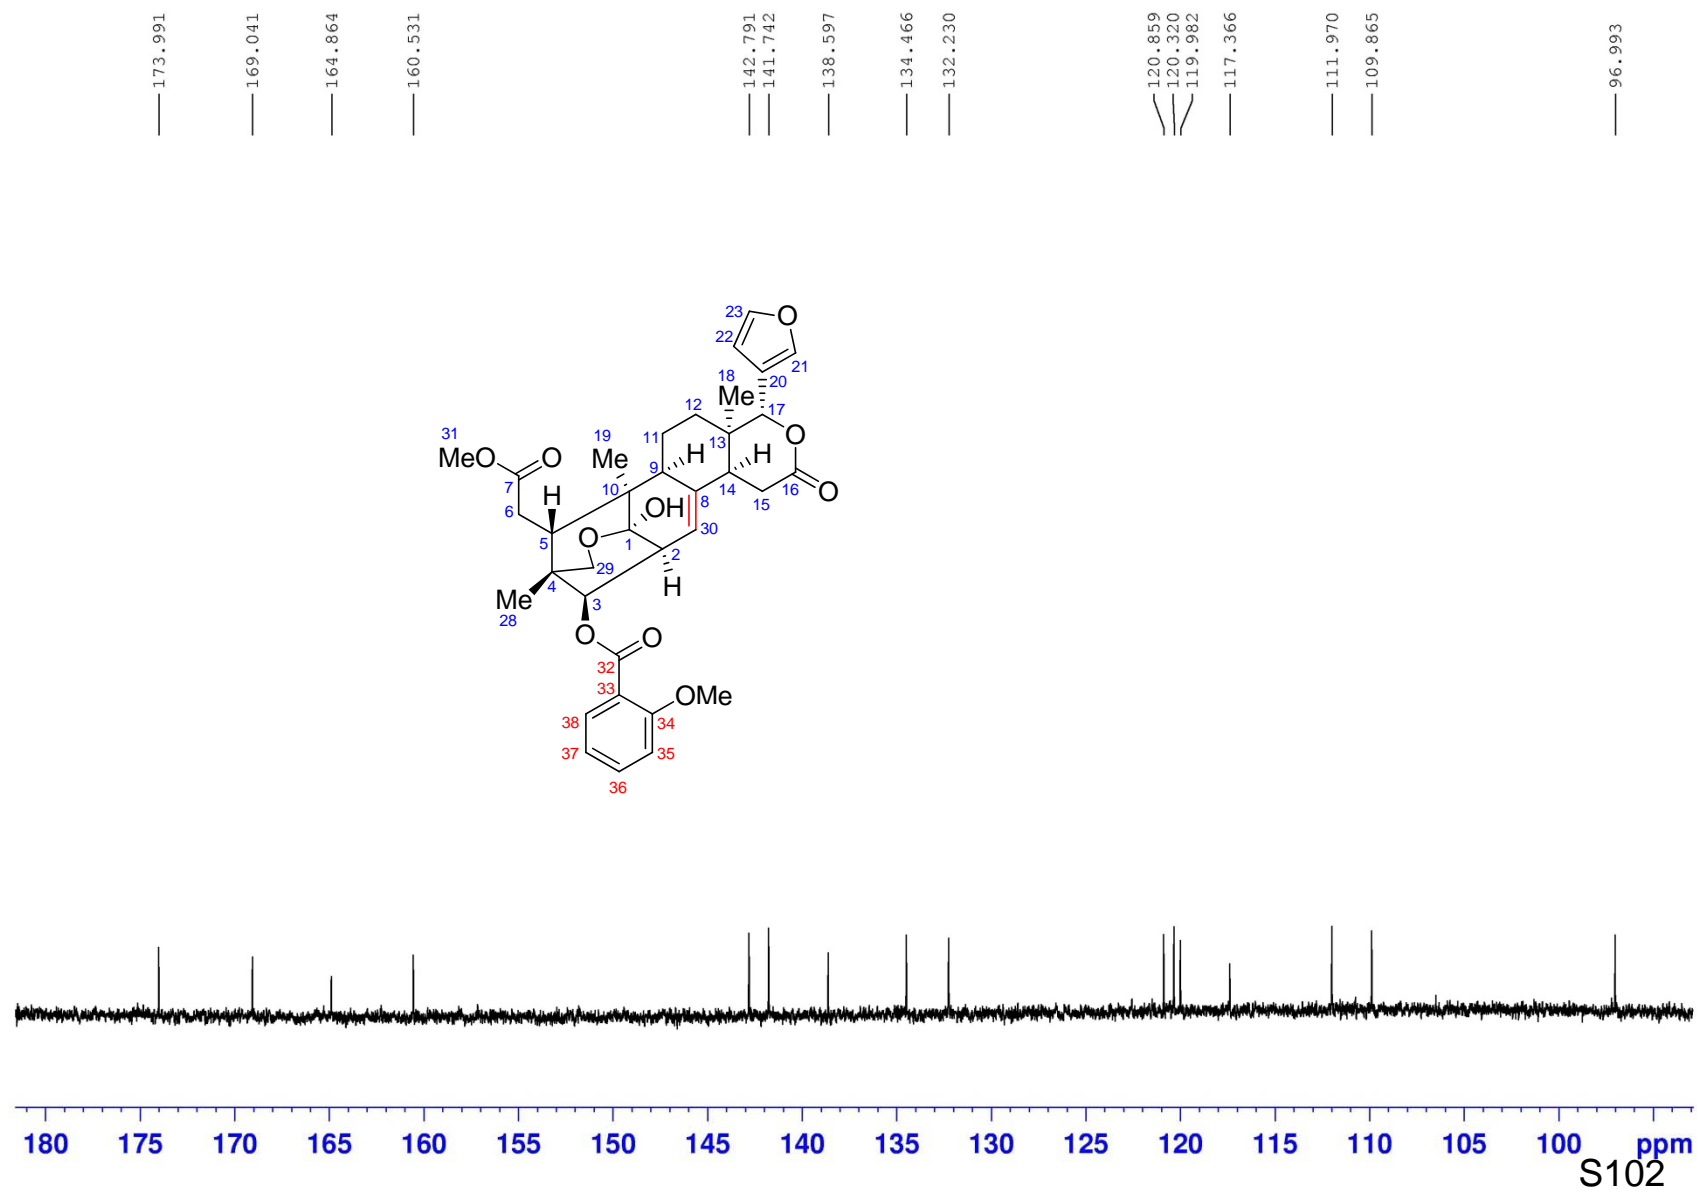

$^{13}\text{C}$  NMR (100 MHz) spectrum of **8f** in  $\text{CDCl}_3$

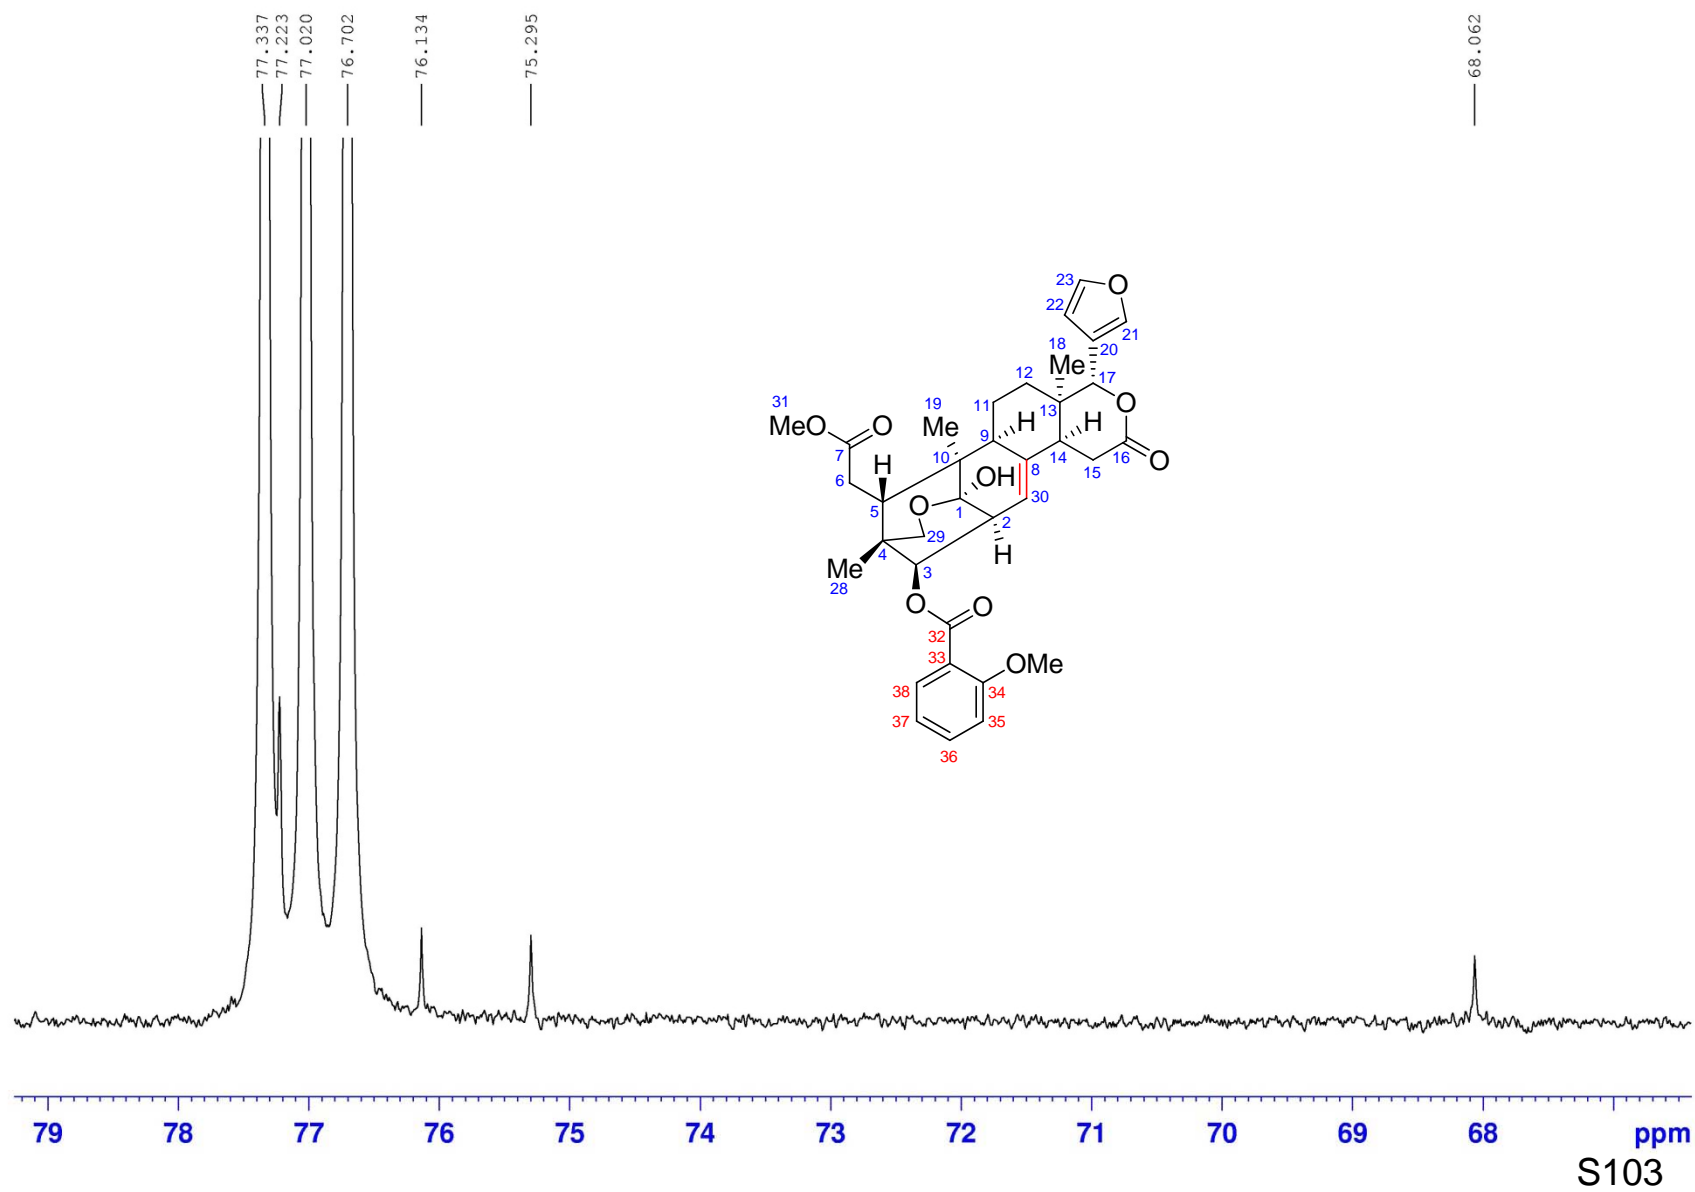

$^{13}\text{C}$  NMR (100 MHz) spectrum of **8f** in  $\text{CDCl}_3$

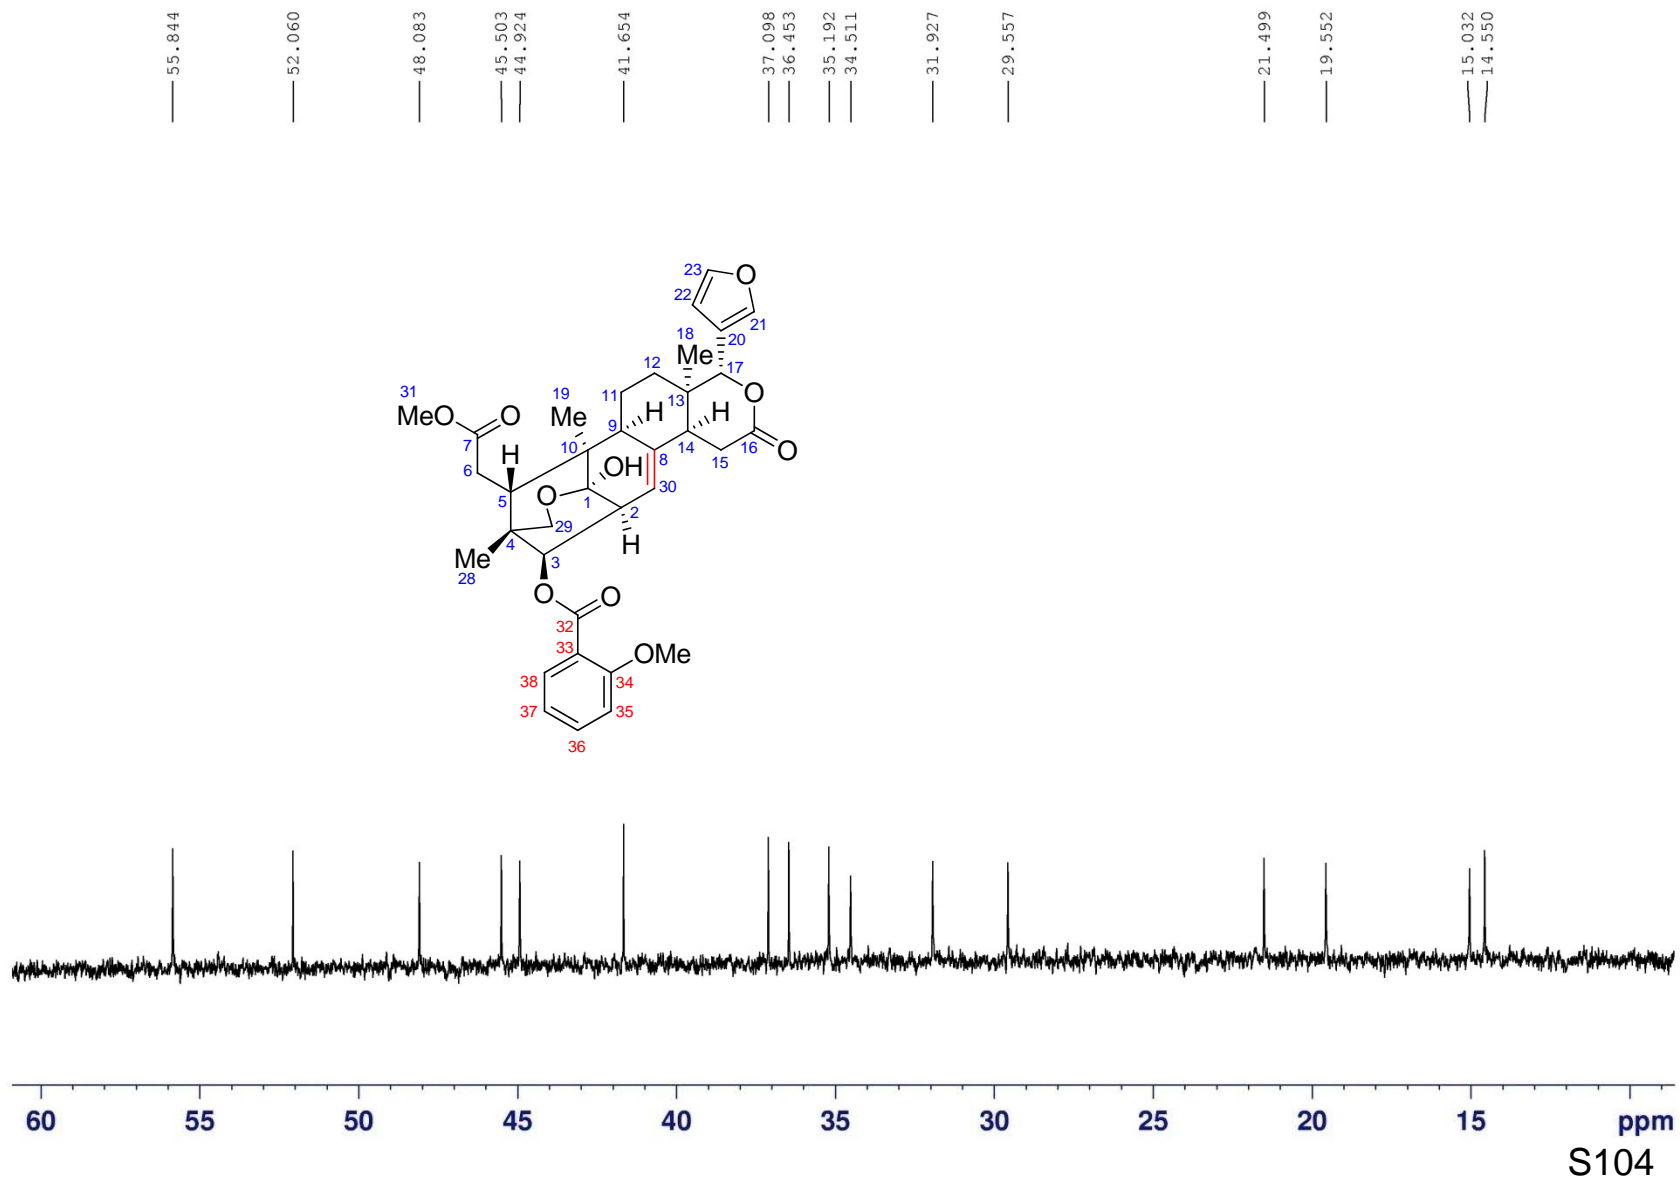

# DEPT 135 spectrum of **8f** in CDCl<sub>3</sub>

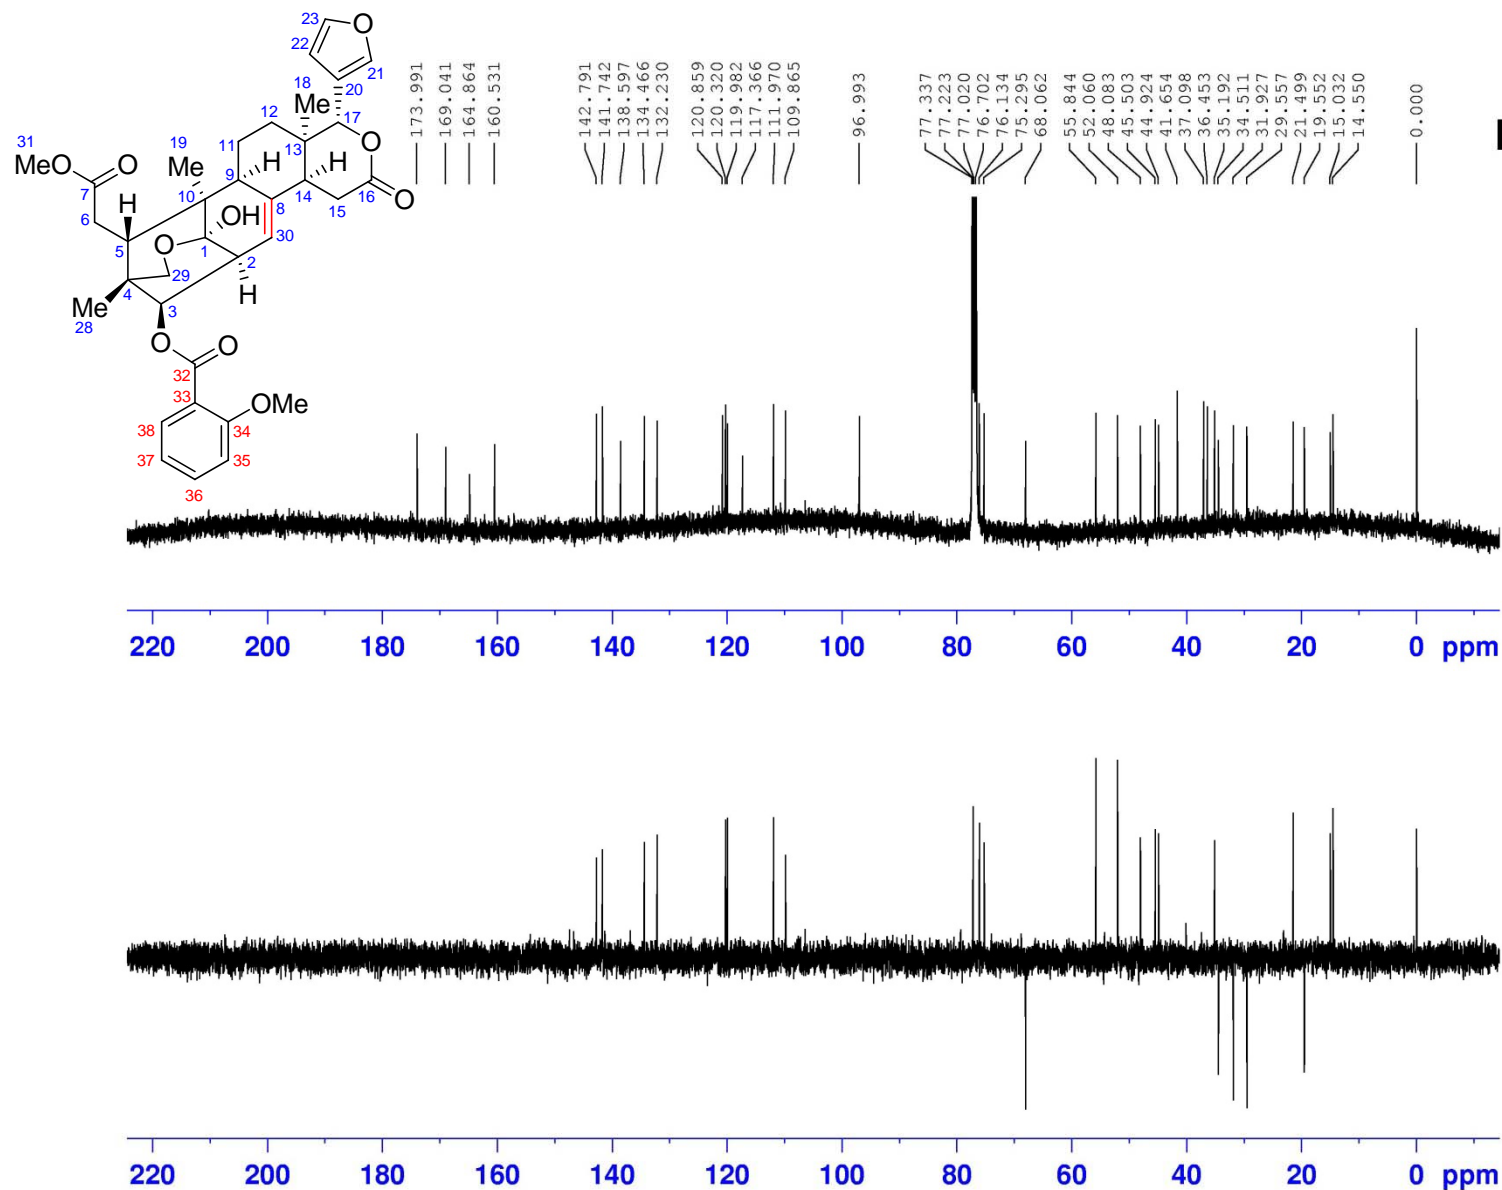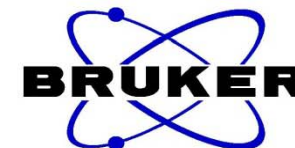

```

NAME      czc-1-CH3-LINJIAY.
EXPNO     103
PROCNO    1
Date_     20171021
Time      14.56
INSTRUM   spect
PROBHD    5 mm CPPBBO BB
PULPROG   deptspl35
TD        65536
SOLVENT   CDCl3
NS         800
DS         4
SWH        24038.461 Hz
FIDRES     0.366798 Hz
AQ         1.3631988 se
RG         130.26
DW         20.800 us
DE         18.00 us
TE         297.0 K
CNST2     145.0000000
D1         2.00000000 se
D2         0.00344828 se
D12        0.00002000 se
TD0        1
    
```

```

===== CHANNEL f1 =====
SFO1     100.6233324 MH
NUC1      13C
P1        10.00 us
P13       2000.00 us
SI        32768
SF        100.6127693 MH
WDW       EM
SSB       0
LB        1.00 Hz
GB        0
PC        1.40
    
```

# DEPT 135 spectrum of **8f** in CDCl<sub>3</sub>

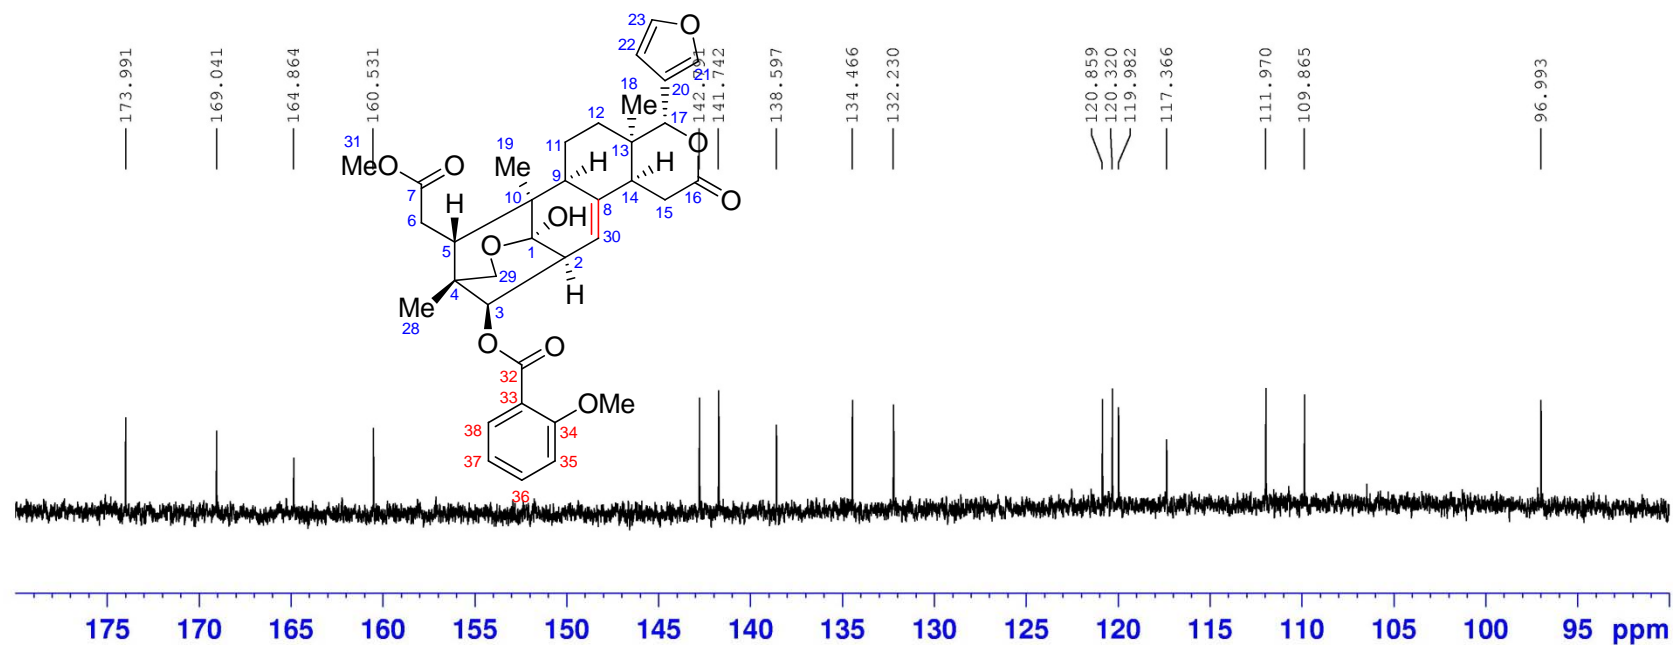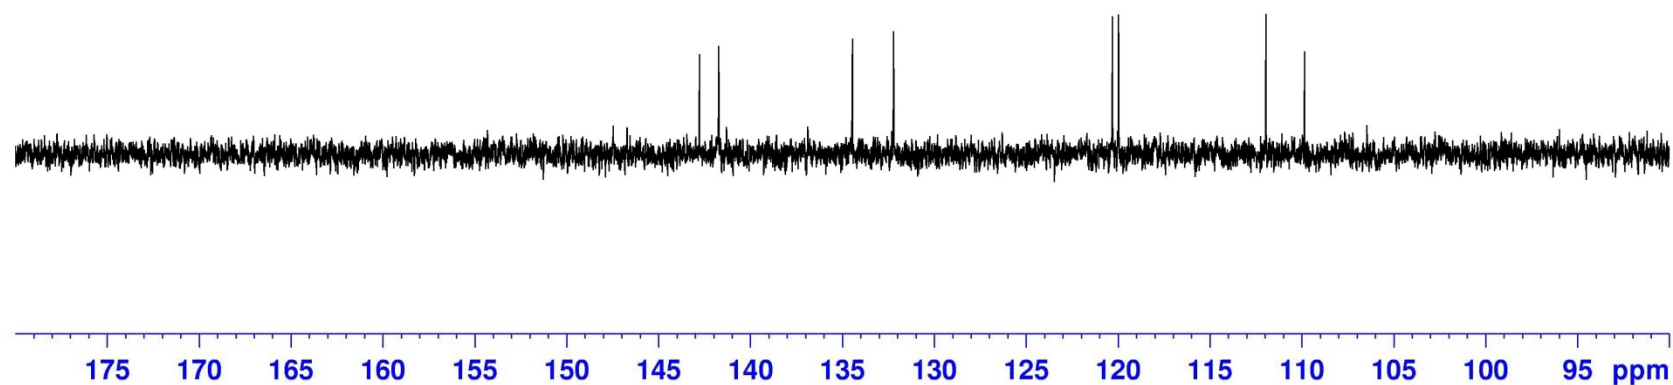



DEPT 135 spectrum of **8f** in CDCl<sub>3</sub>

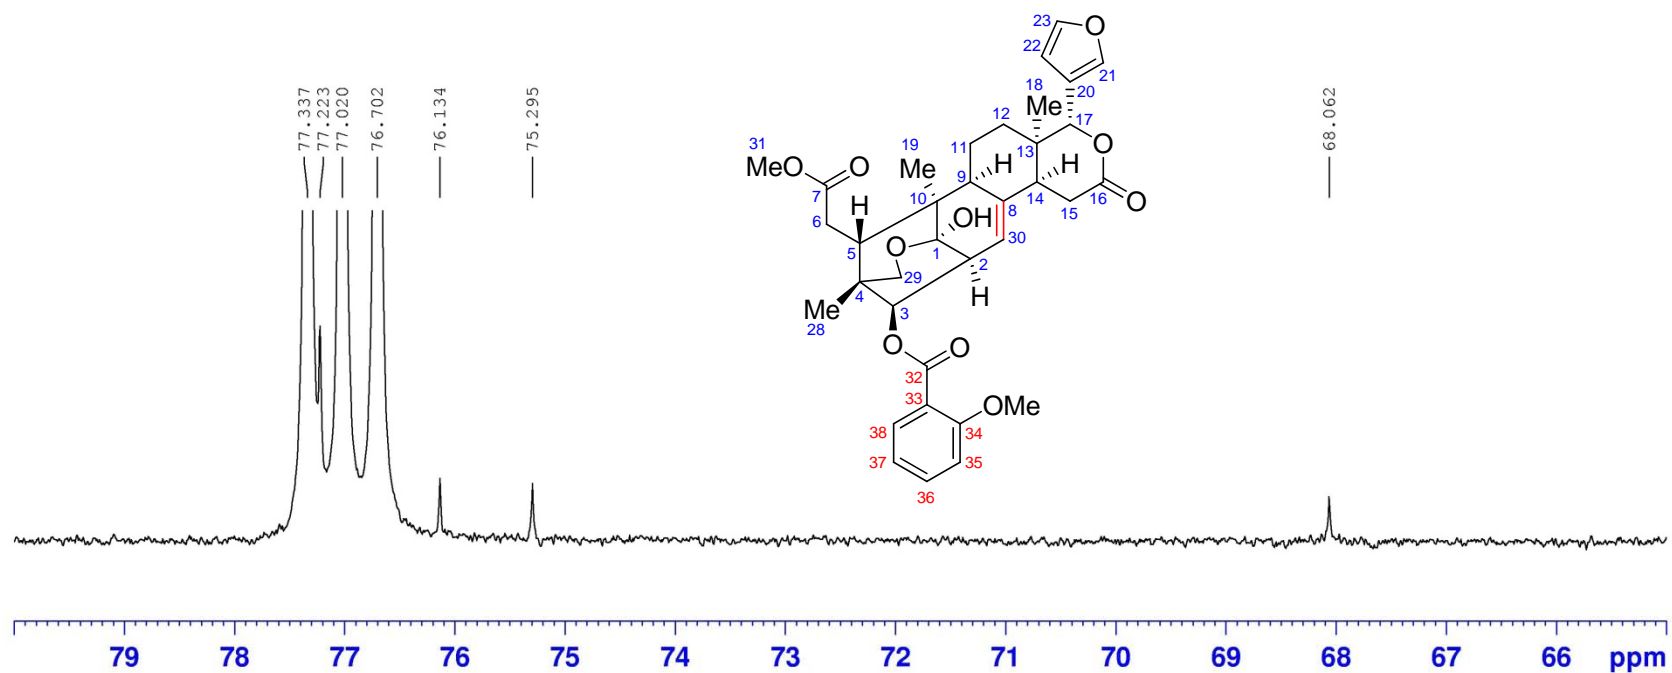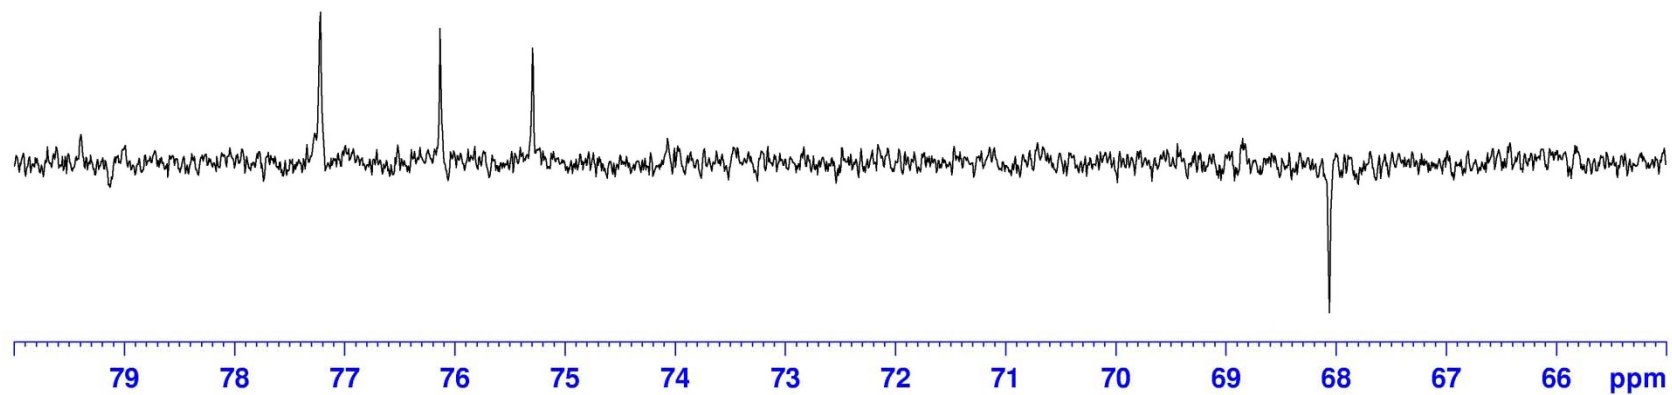

# DEPT 135 spectrum of **8f** in CDCl<sub>3</sub>

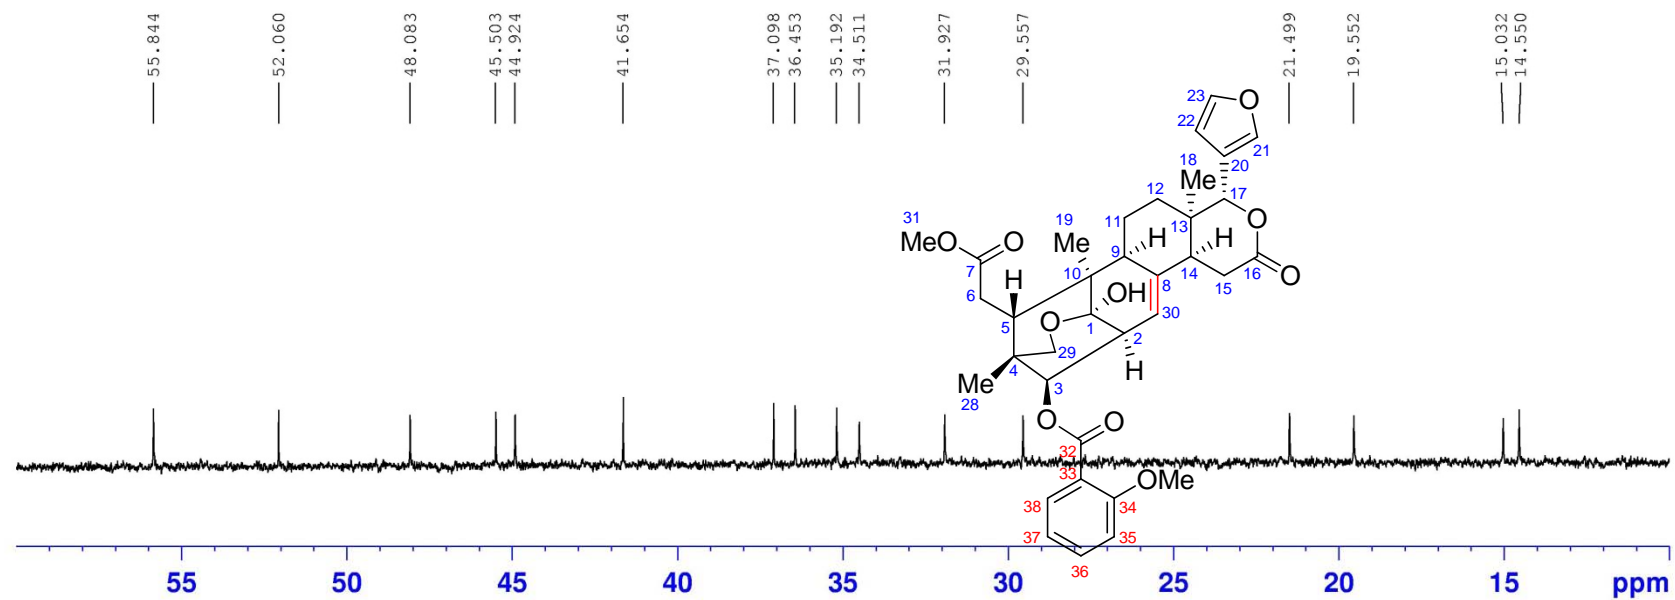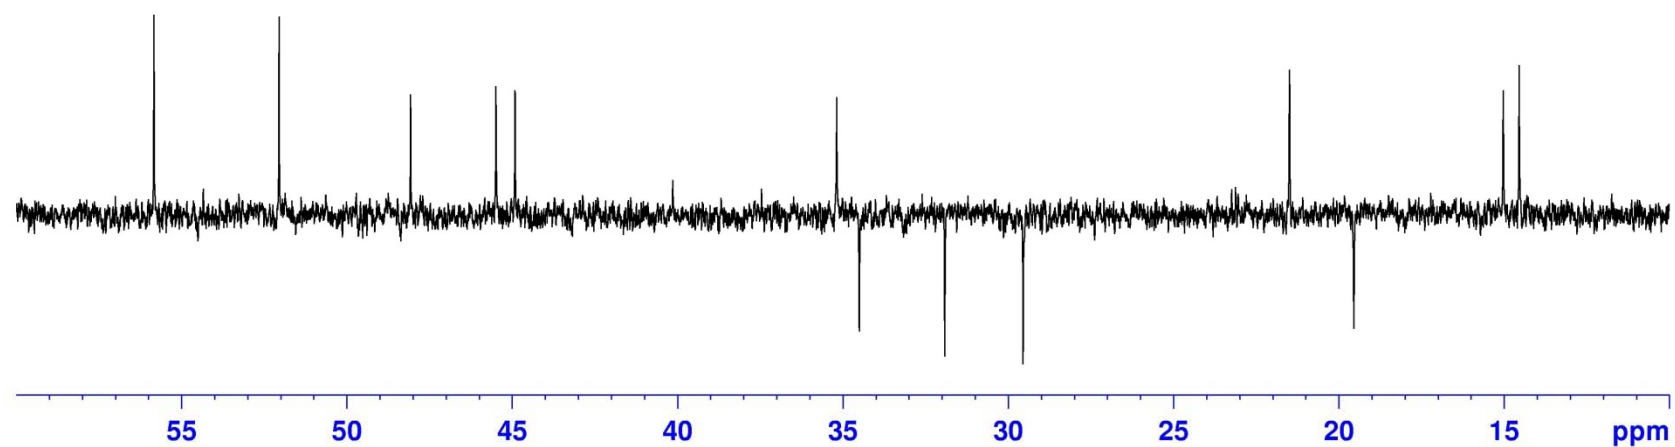

# HR-ESIMS for compound **8g**

## Generic Display Report

### Analysis Info

Analysis Name D:\Data\MS\data\201809\liwanshan\_WSD-74\_pos\_19\_01\_5580.d  
Method LC\_Direct Infusion\_pos\_100-1000mz.m  
Sample Name liwanshan\_WSD-74\_pos  
Comment

Acquisition Date 9/30/2018 6:22:50 PM

Operator SCSIO  
Instrument maXis

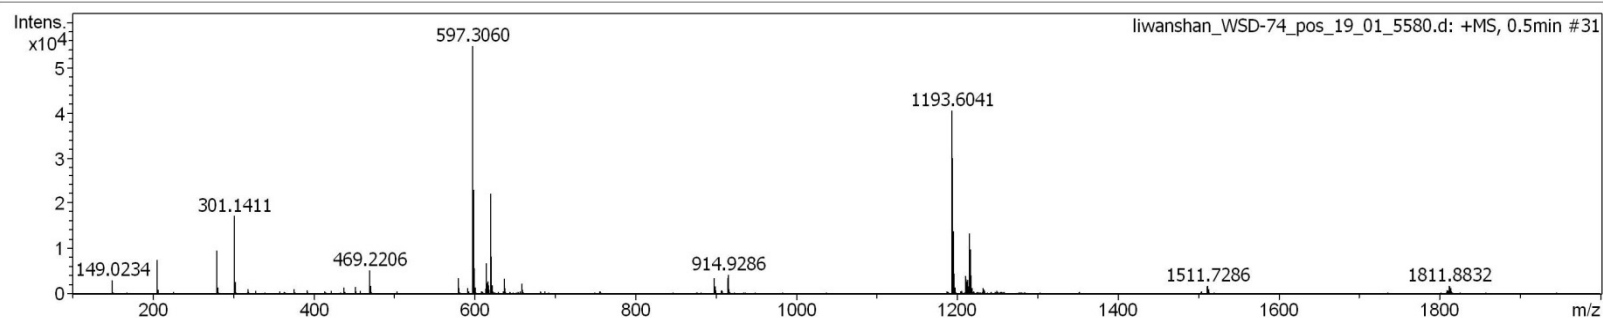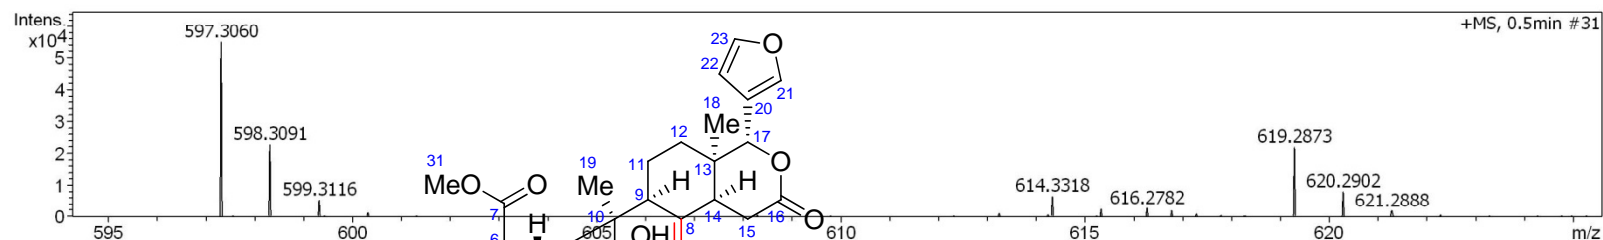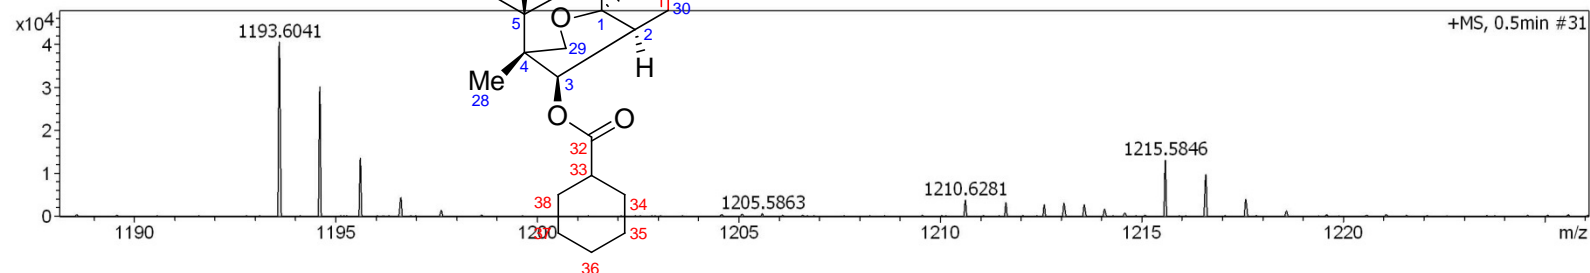

# HR-ESIMS for compound **8g**

## Mass Spectrum SmartFormula Report

### Analysis Info

Analysis Name D:\Data\MS\data\201809\liwanshan\_WSD-74\_pos\_19\_01\_5580.d  
 Method LC\_Direct Infusion\_pos\_100-1000mz.m  
 Sample Name liwanshan\_WSD-74\_pos  
 Comment

Acquisition Date 9/30/2018 6:22:50 PM  
 Operator SCSIO  
 Instrument maXis 255552.00029

### Acquisition Parameter

|             |          |                      |          |                  |           |
|-------------|----------|----------------------|----------|------------------|-----------|
| Source Type | ESI      | Ion Polarity         | Positive | Set Nebulizer    | 0.4 Bar   |
| Focus       | Active   | Set Capillary        | 4500 V   | Set Dry Heater   | 180 °C    |
| Scan Begin  | 100 m/z  | Set End Plate Offset | -500 V   | Set Dry Gas      | 4.0 l/min |
| Scan End    | 2000 m/z | Set Charging Voltage | 0 V      | Set Divert Valve | Waste     |
|             |          | Set Corona           | 0 nA     | Set APCI Heater  | 0 °C      |

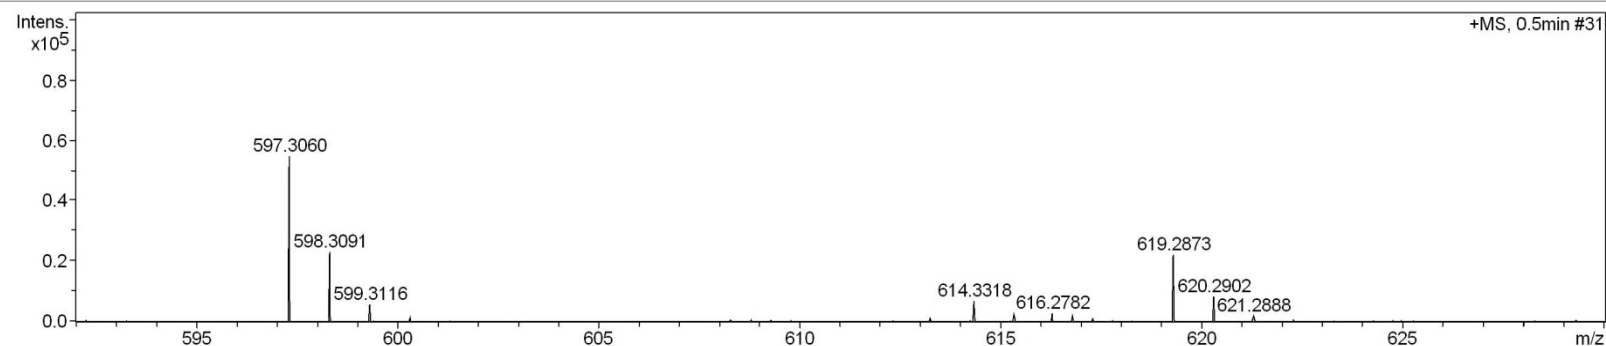

| Meas. m/z | # | Ion Formula | Score  | m/z       | err [ppm] | err [mDa] | mSigma | rdb  | e <sup>-</sup> Conf | N-Rule |
|-----------|---|-------------|--------|-----------|-----------|-----------|--------|------|---------------------|--------|
| 597.3060  | 1 | C34H45O9    | 100.00 | 597.3058  | -0.3      | -0.2      | 22.1   | 12.5 | even                | ok     |
| 619.2873  | 1 | C34H44NaO9  | 100.00 | 619.2878  | -0.7      | -0.5      | 5.8    | 12.5 | even                | ok     |
| 1193.6041 | 1 | C68H89O18   | 100.00 | 1193.6043 | -0.2      | -0.2      | 11.3   | 24.5 | even                | ok     |
| 1215.5846 | 1 | C68H88NaO18 | 100.00 | 1215.5863 | 1.4       | 1.7       | 8.7    | 24.5 | even                | ok     |

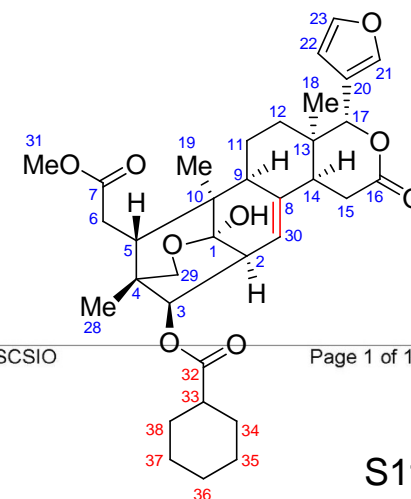

# <sup>1</sup>H NMR (400 MHz) spectrum of **8g** in CDCl<sub>3</sub>

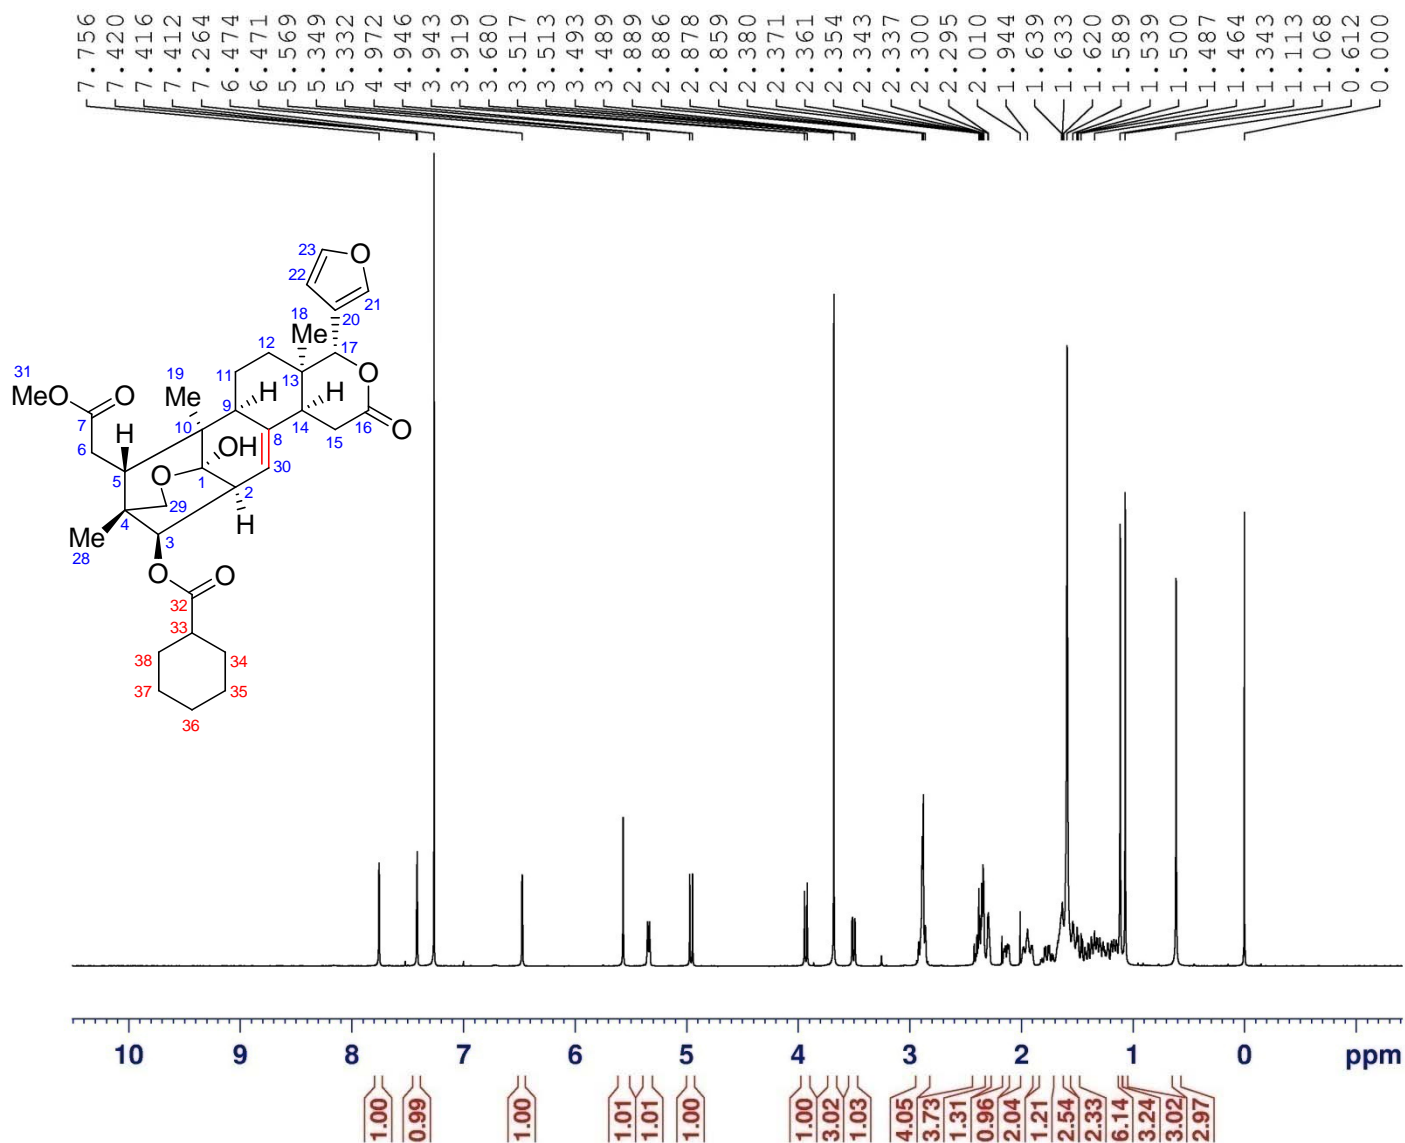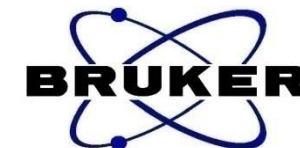

```

NAME      czc-1-CH3-huanjijiasu
EXPNO     1
PROCNO    1
Date_     20171016
Time      15.33
INSTRUM   spect
PROBHD    5 mm CPPBBO BB
PULPROG   zg30
TD        65536
SOLVENT   CDCl3
NS        16
DS        2
SWH       8223.685 Hz
FIDRES    0.125483 Hz
AQ        3.9846387 sec
RG        208.5
DW        60.800 usec
DE        10.00 usec
TE        297.0 K
D1        1.00000000 sec
TD0       1

===== CHANNEL f1 =====
SFO1      400.1324710 MHz
NUC1      1H
P1        11.50 usec
SI        65536
SF        400.1300082 MHz
WDW       EM
SSB       0
LB        0.30 Hz
GB        0
PC        1.00
    
```

$^1\text{H}$  NMR (400 MHz) spectrum of **8g** in  $\text{CDCl}_3$

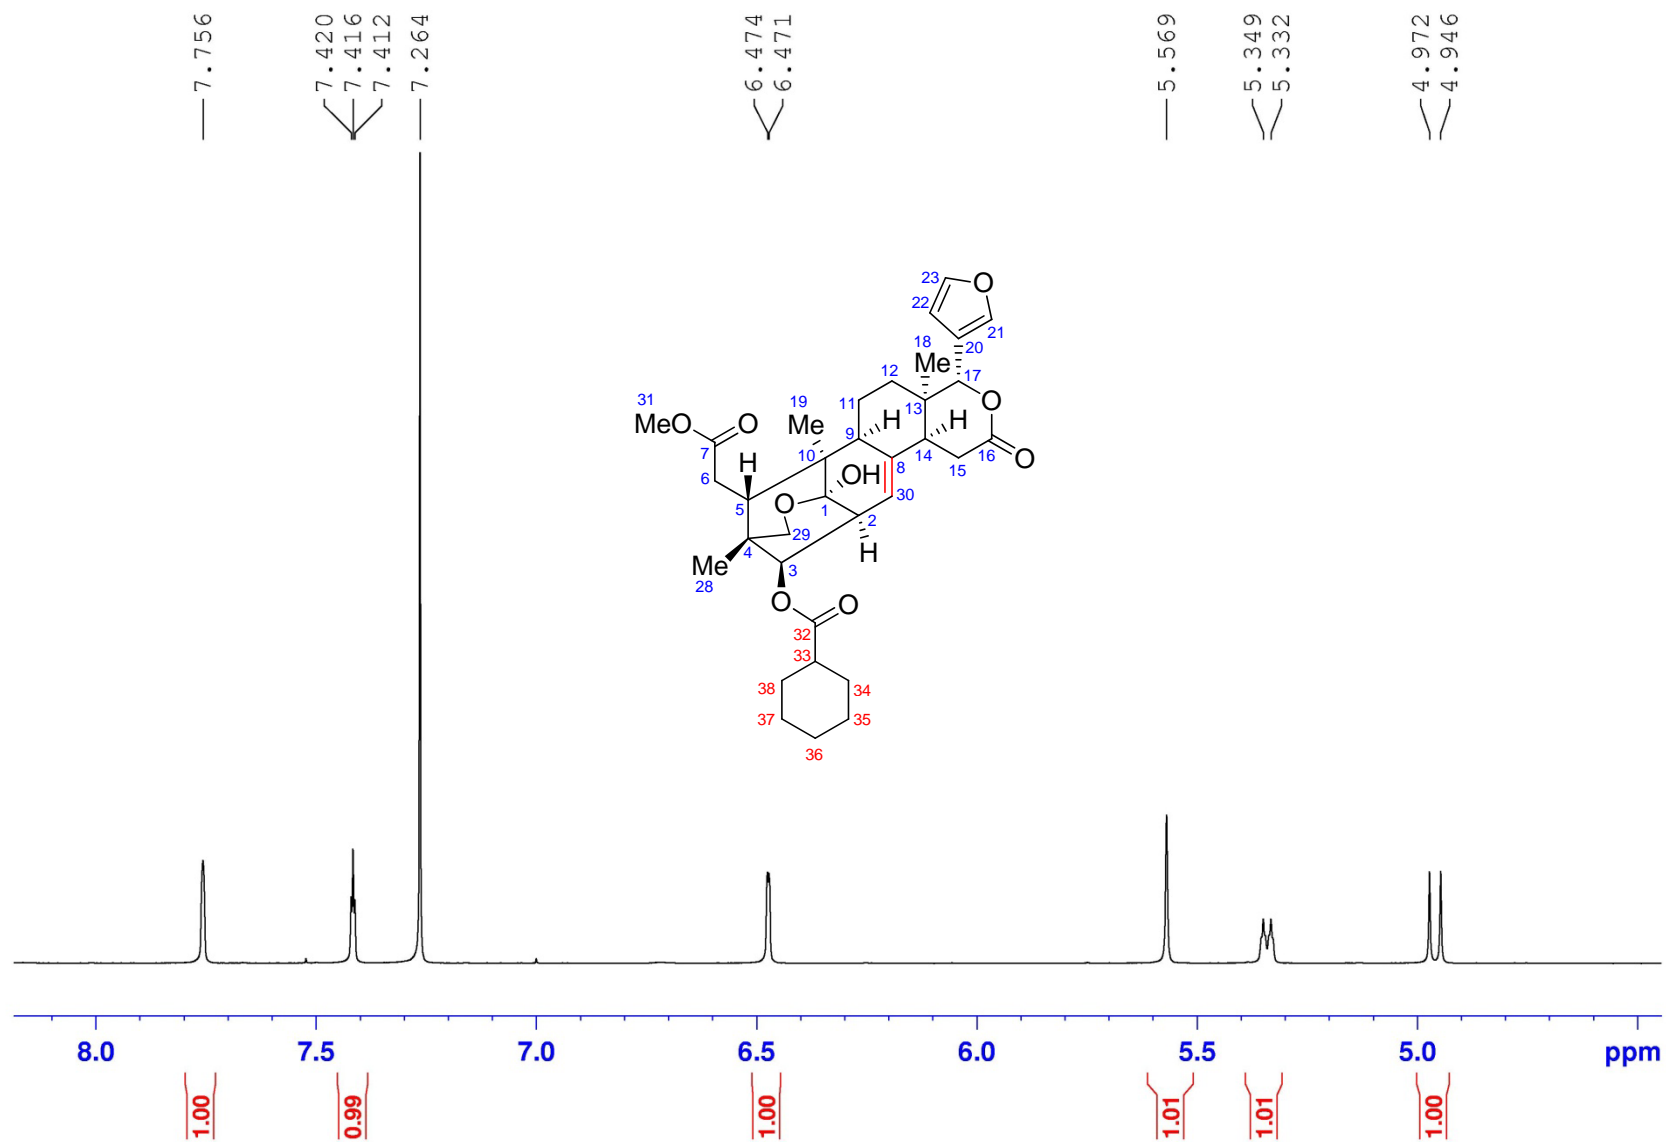

S112

$^1\text{H}$  NMR (400 MHz) spectrum of **8g** in  $\text{CDCl}_3$

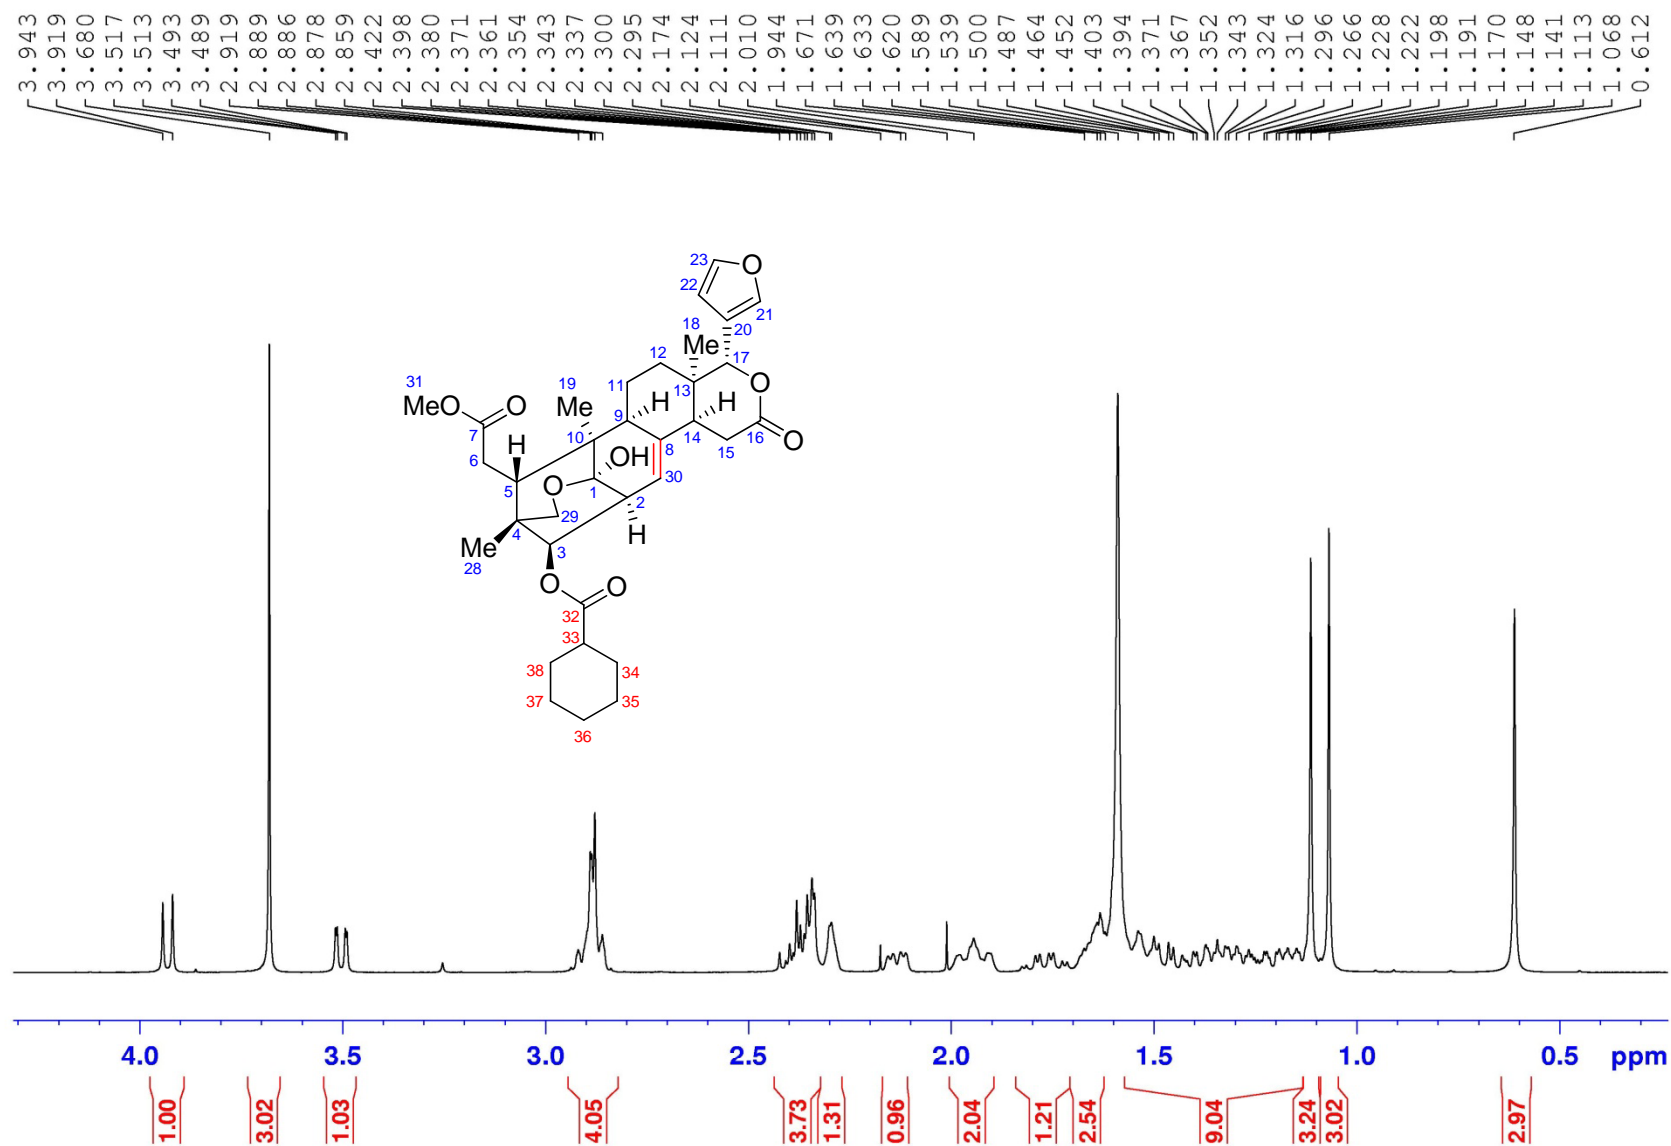

S113

$^{13}\text{C}$  NMR (100 MHz) spectrum of **8g** in  $\text{CDCl}_3$

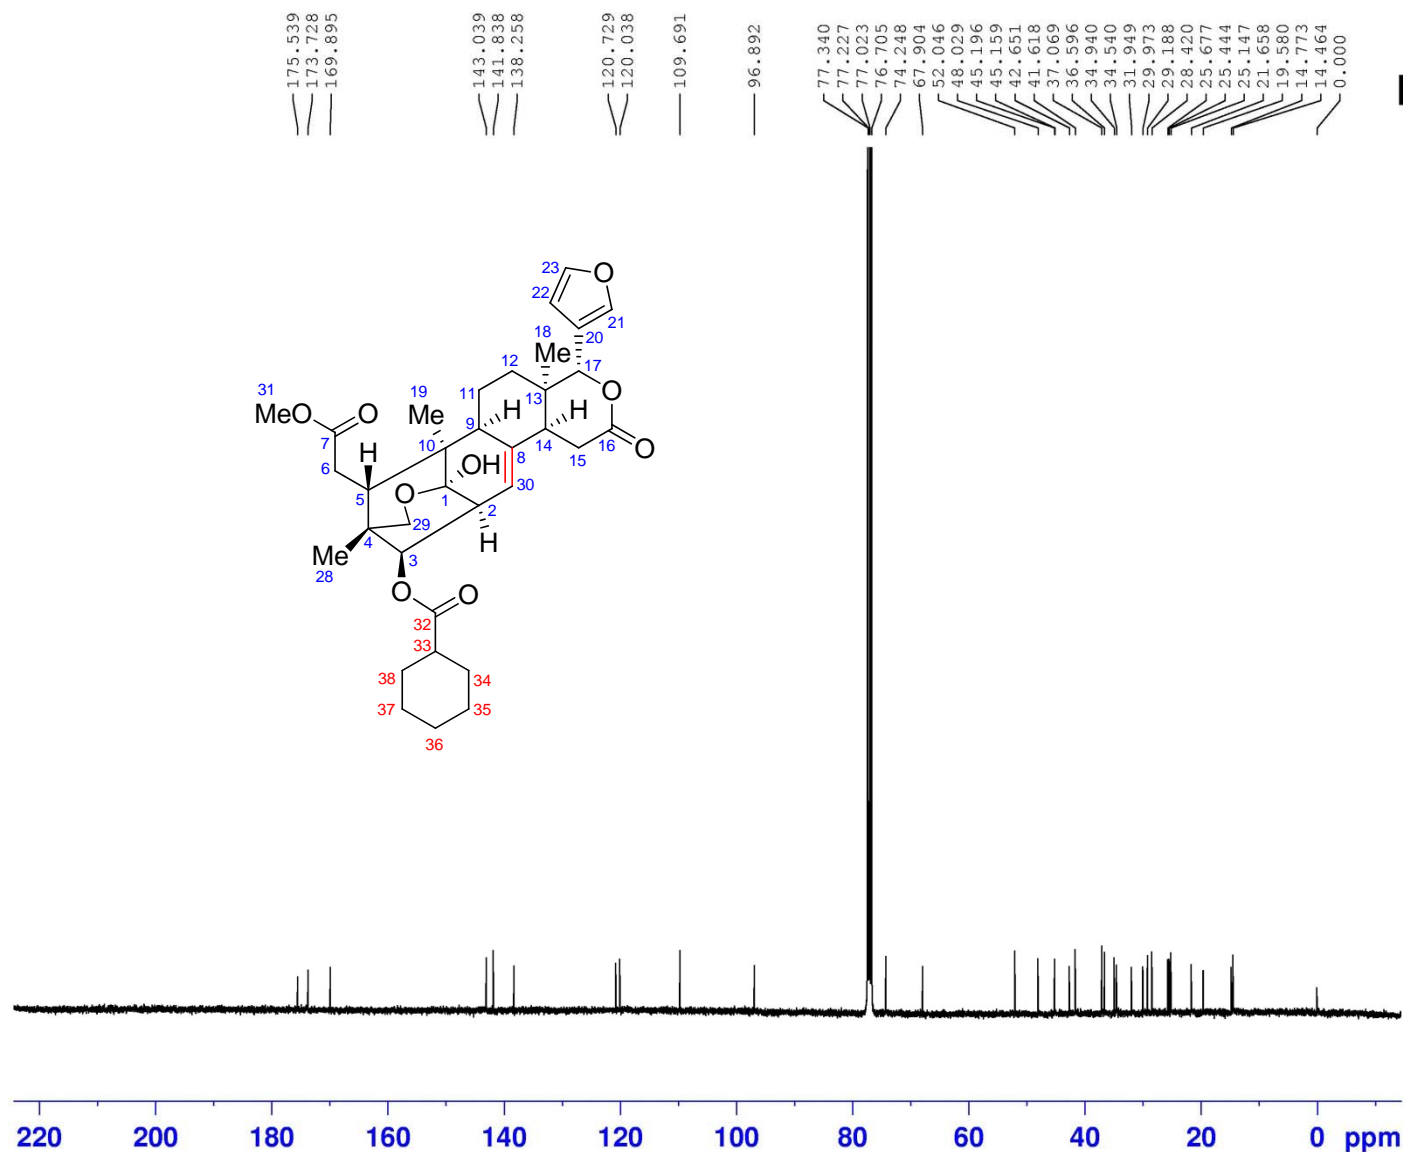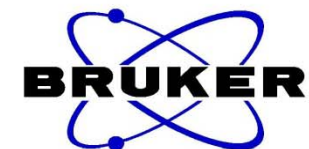

NAME czc-1-CH3-huanjijia  
 EXPNO 2  
 PROCNO 1  
 Date\_ 20171016  
 Time 22.33  
 INSTRUM spect  
 PROBHD 5 mm CPPBBO BB  
 PULPROG zgpg30  
 TD 65536  
 SOLVENT  $\text{CDCl}_3$   
 NS 1024  
 DS 4  
 SWH 24038.461 Hz  
 FIDRES 0.366798 Hz  
 AQ 1.3631988 sec  
 RG 85.34  
 DW 20.800 usec  
 DE 18.00 usec  
 TE 297.0 K  
 D1 2.00000000 sec  
 D11 0.03000000 sec  
 TD0 1

===== CHANNEL f1 =====  
 SF01 100.623324 MHz  
 NUC1  $^{13}\text{C}$   
 P1 10.00 usec  
 SI 32768  
 SF 100.6127689 MHz  
 WDW EM  
 SSB 0  
 LB 1.00 Hz  
 GB 0  
 PC 1.40



$^{13}\text{C}$  NMR (100 MHz) spectrum of **8g** in  $\text{CDCl}_3$

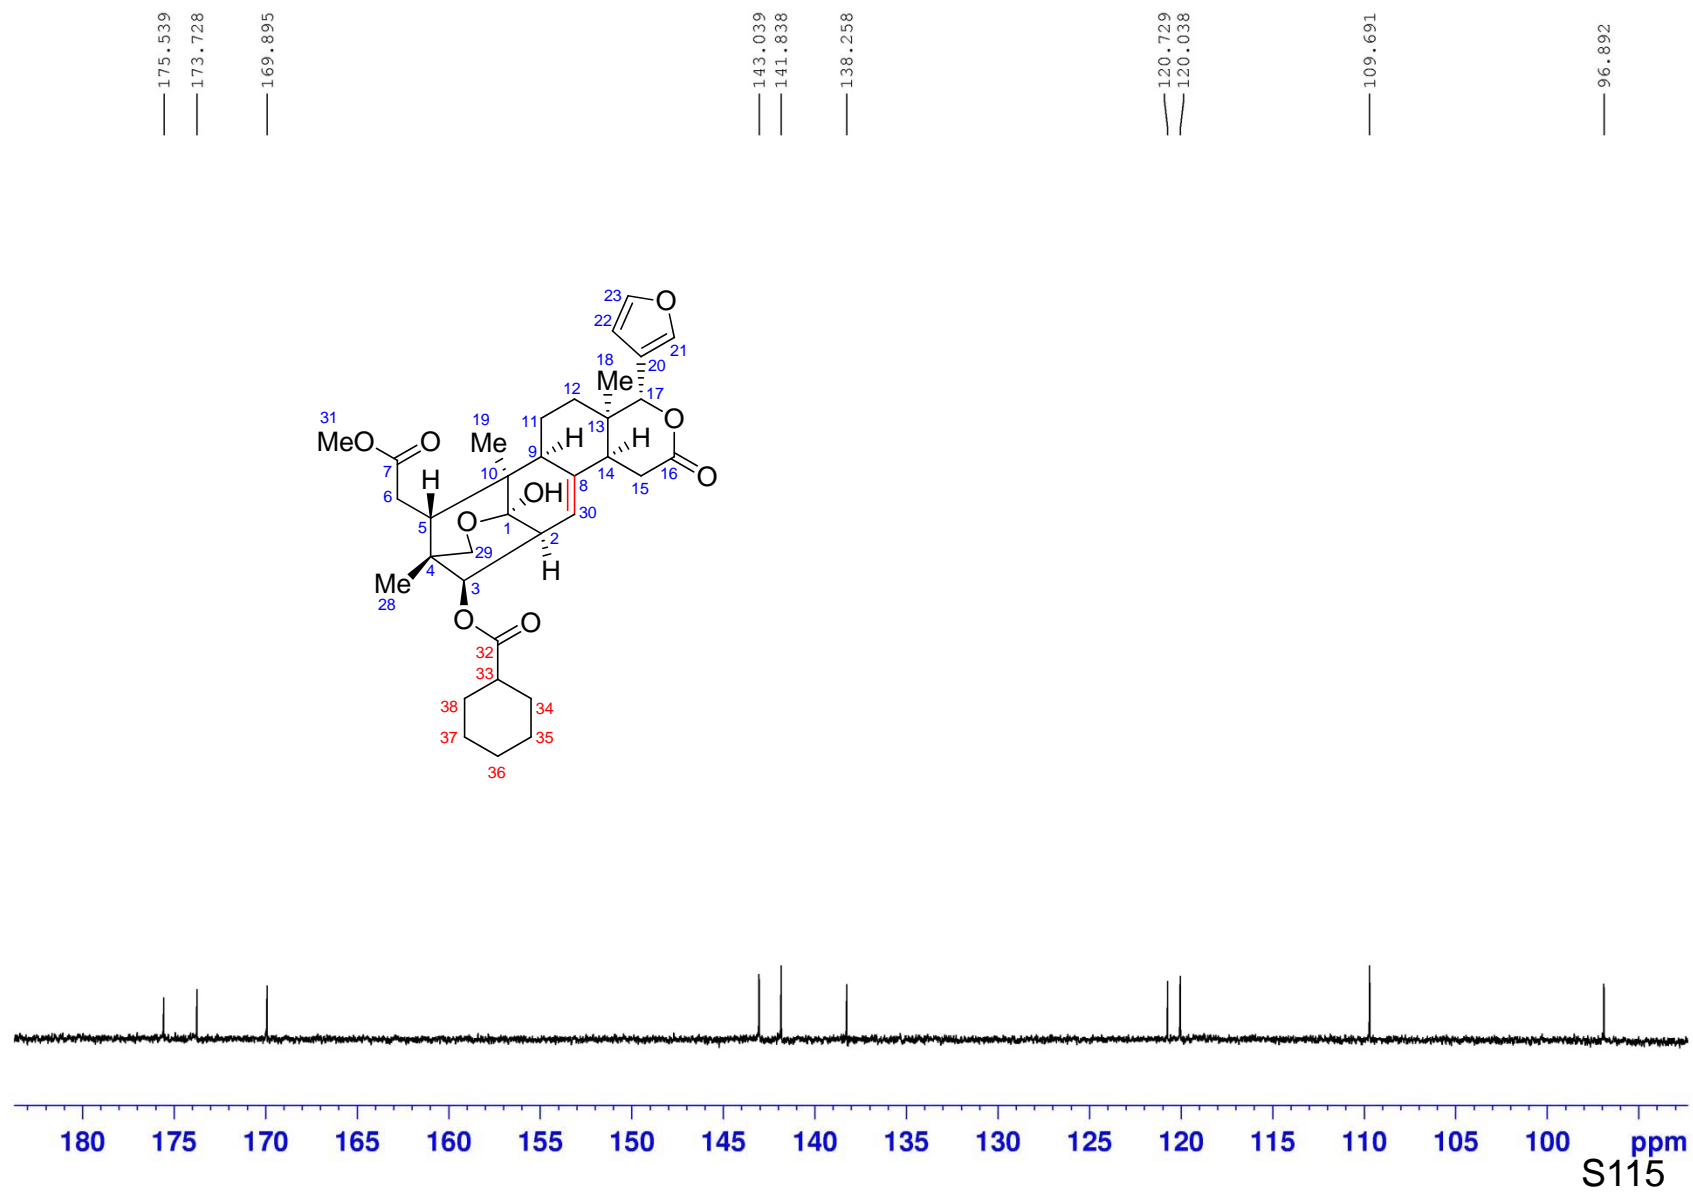

$^{13}\text{C}$  NMR (100 MHz) spectrum of **8g** in  $\text{CDCl}_3$

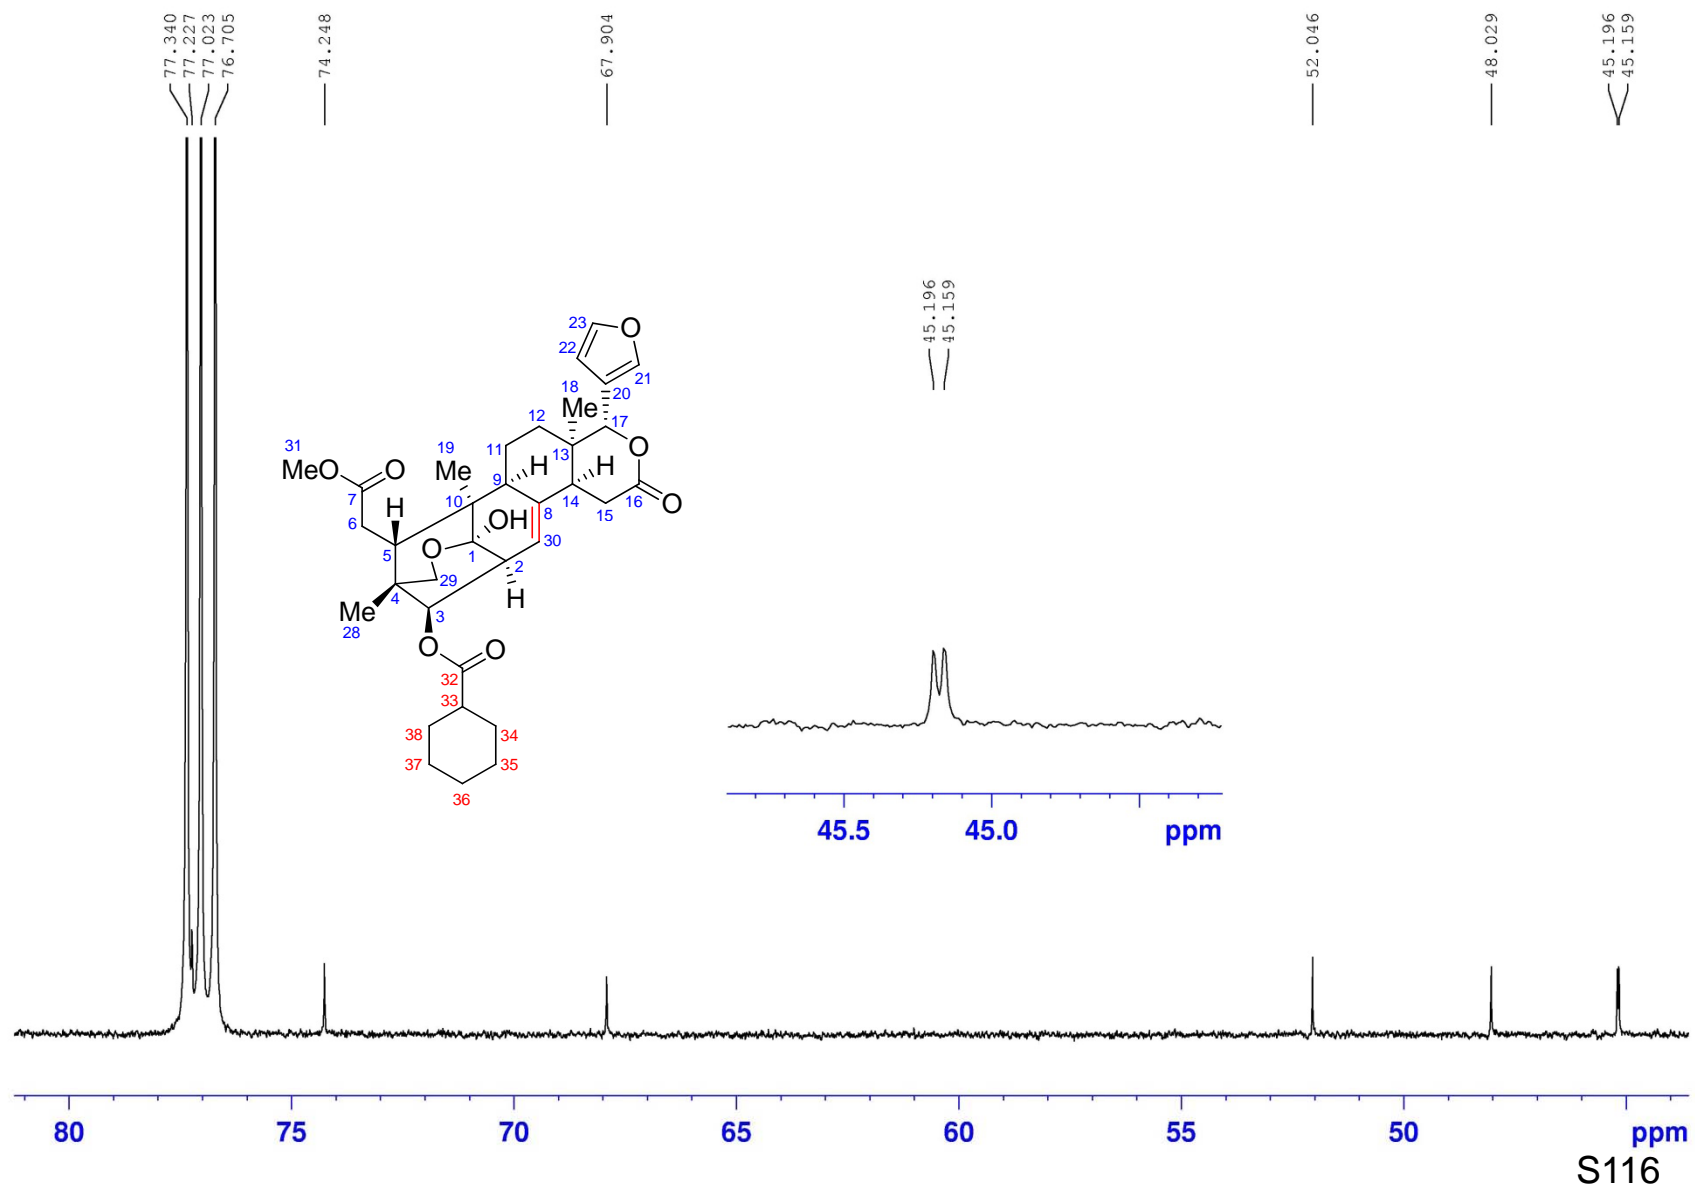

$^{13}\text{C}$  NMR (100 MHz) spectrum of **8g** in  $\text{CDCl}_3$

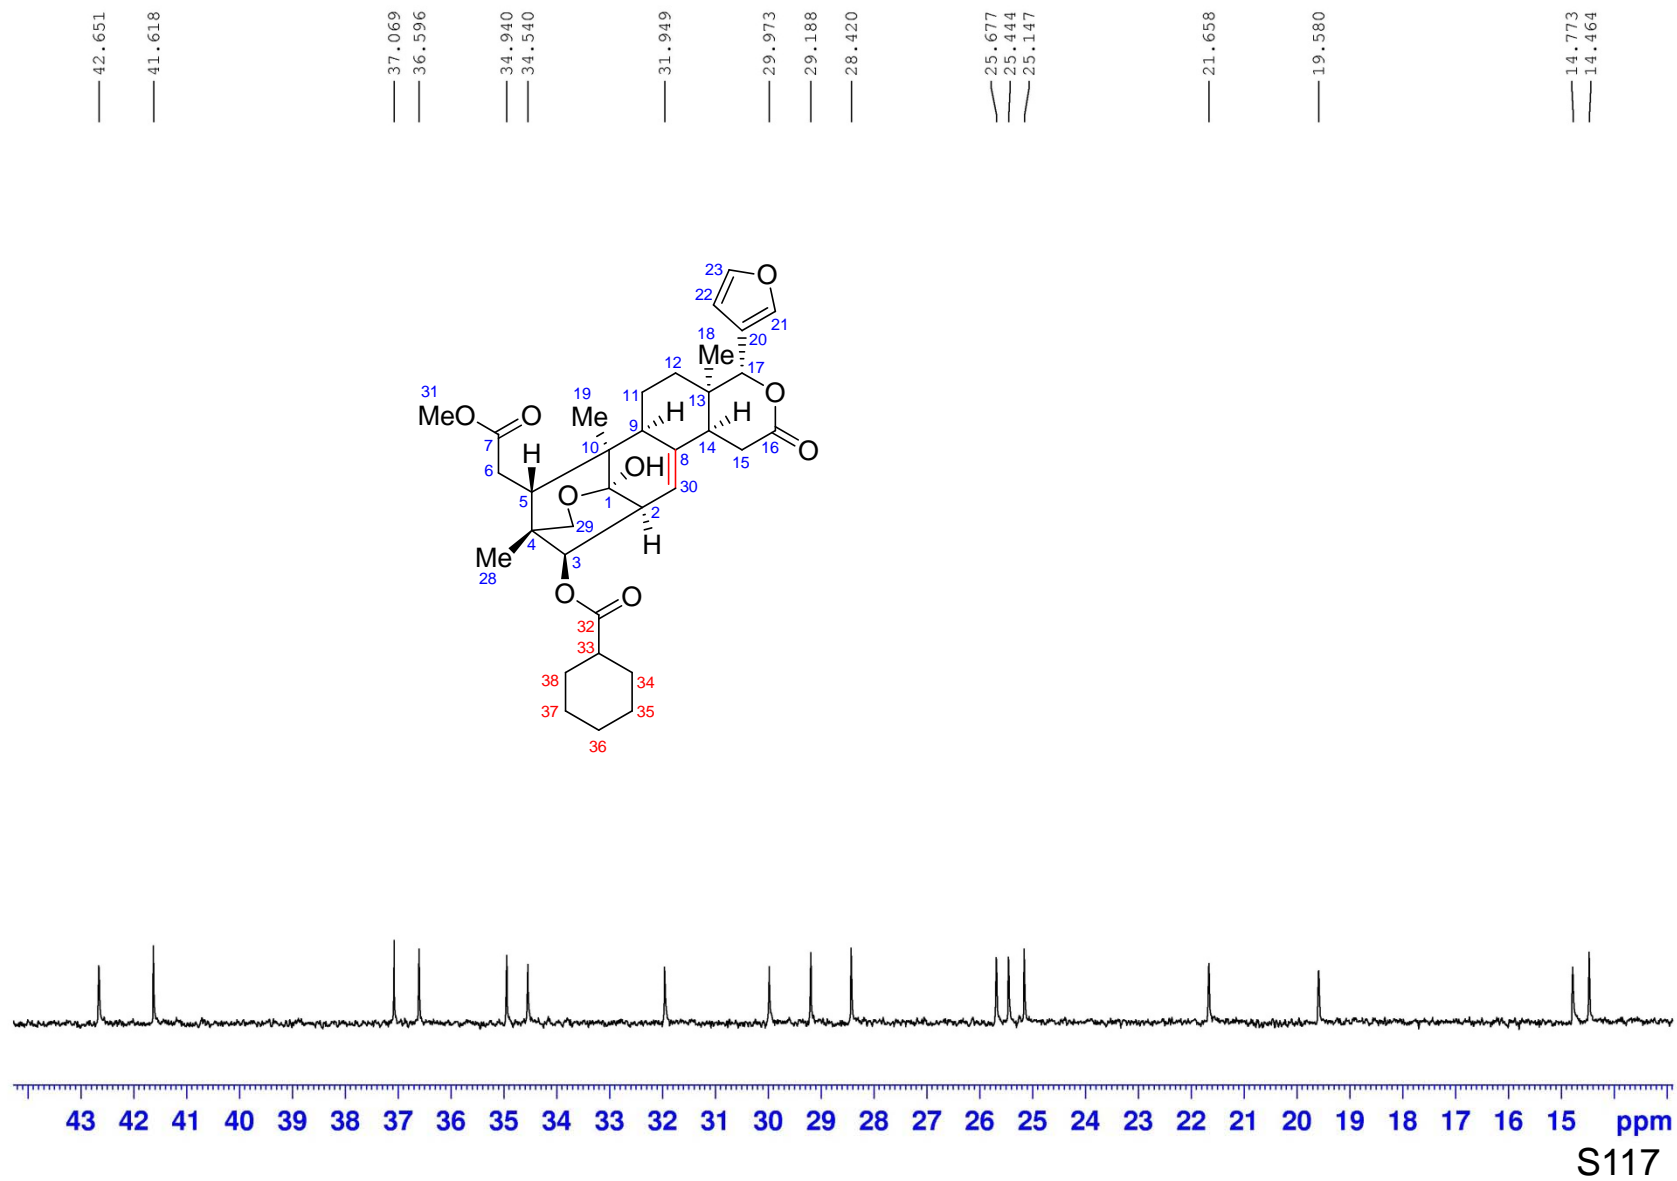

# DEPT 135 spectrum of **8g** in CDCl<sub>3</sub>

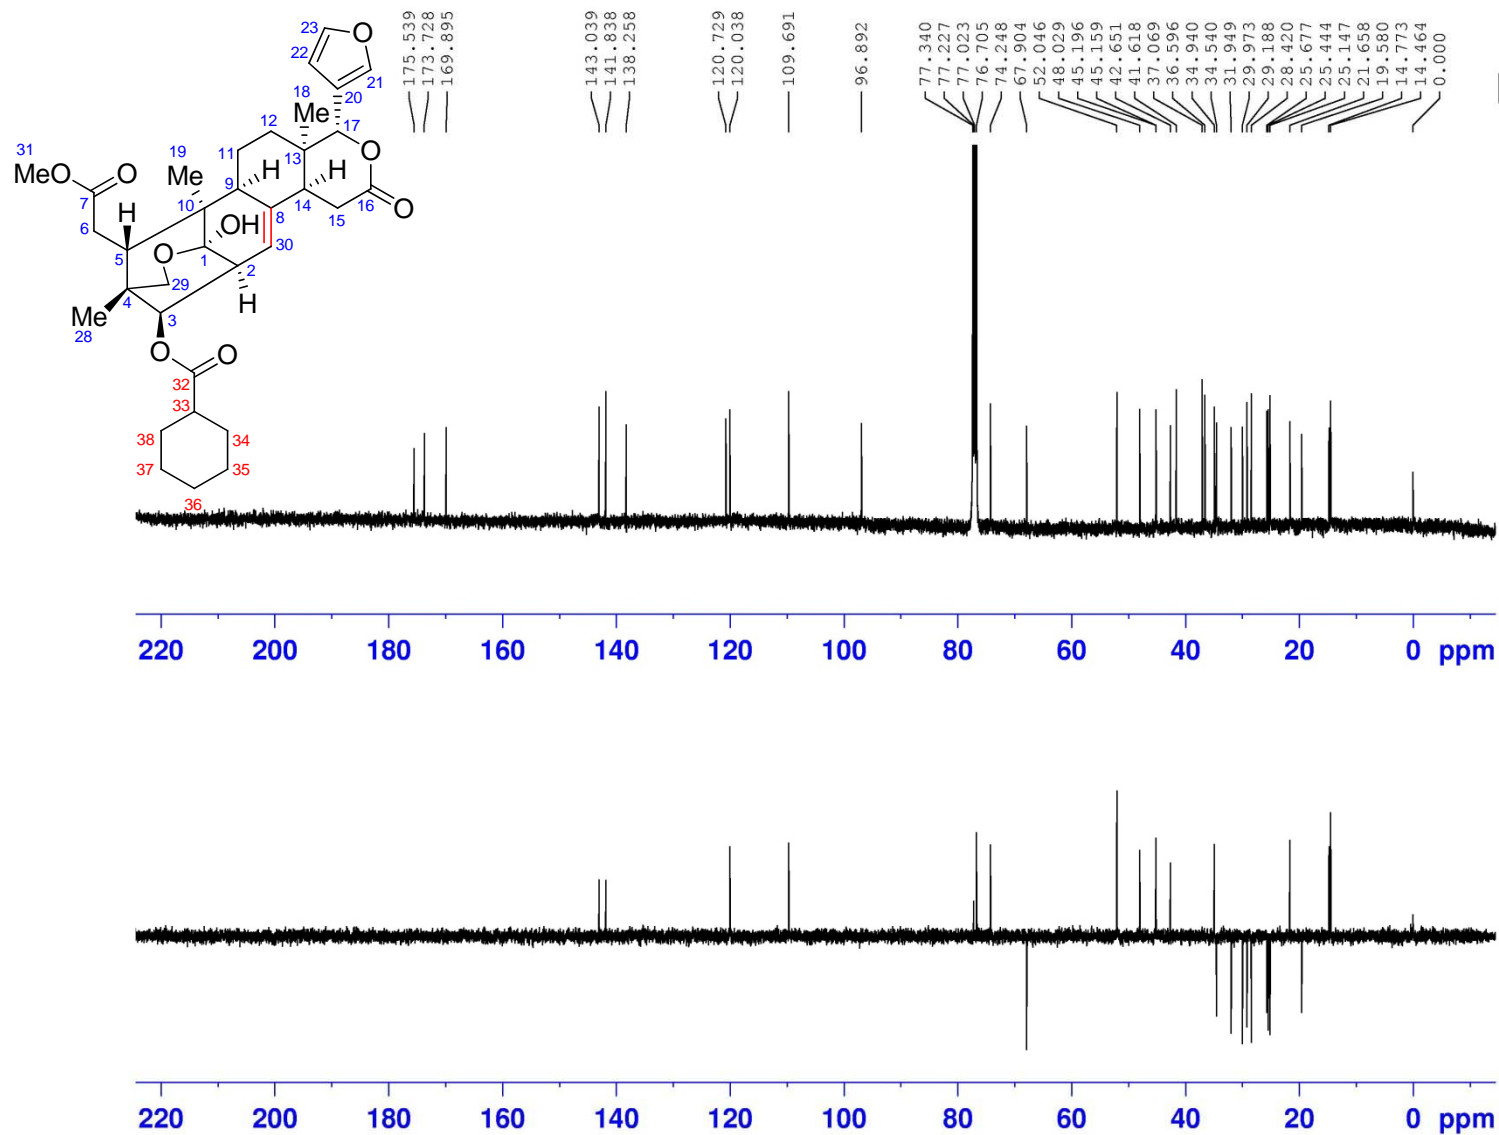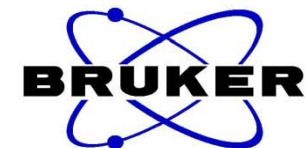

```

NAME      czc-1-CH3-huanji
EXPNO     3
PROCNO    1
Date_     20171016
Time      22.51
INSTRUM   spect
PROBHD    5 mm CPPBBO BB
PULPROG   deptsp135
TD        65536
SOLVENT   CDCl3
NS        300
DS        4
SWH       24038.461 Hz
FIDRES    0.366798 Hz
AQ        1.3631988 sec
RG        130.26
DW        20.800 use
DE        18.00 use
TE        297.0 K
CNST2     145.0000000
D1        2.00000000 sec
D2        0.00344828 sec
D12       0.00002000 sec
TD0       1
    
```

```

===== CHANNEL f1 =====
SF01    100.6233324 MHz
NUC1     13C
P1       10.00 use
P13      2000.00 use
SI       32768
SF       100.6127691 MHz
WDW      EM
SSB      0
LB       1.00 Hz
GB       0
PC       1.40
    
```

# DEPT 135 spectrum of **8g** in CDCl<sub>3</sub>

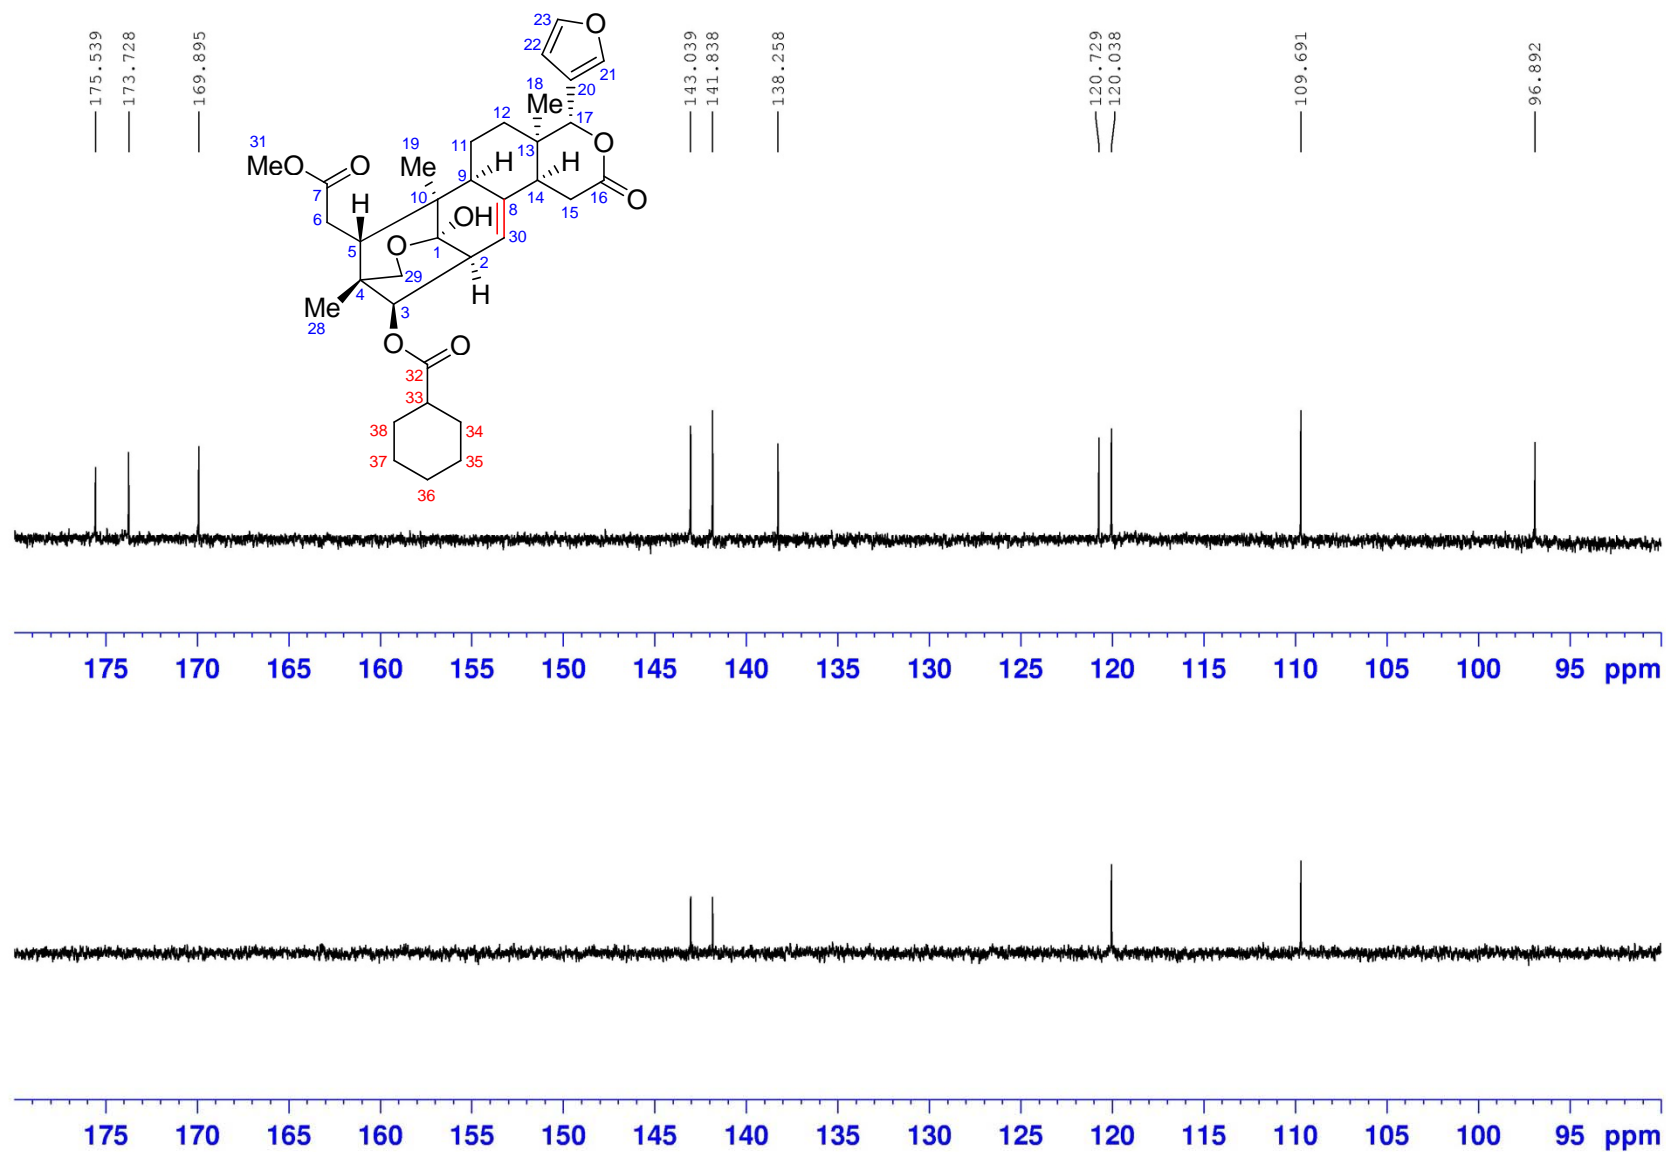

DEPT 135 spectrum of **8g** in CDCl<sub>3</sub>

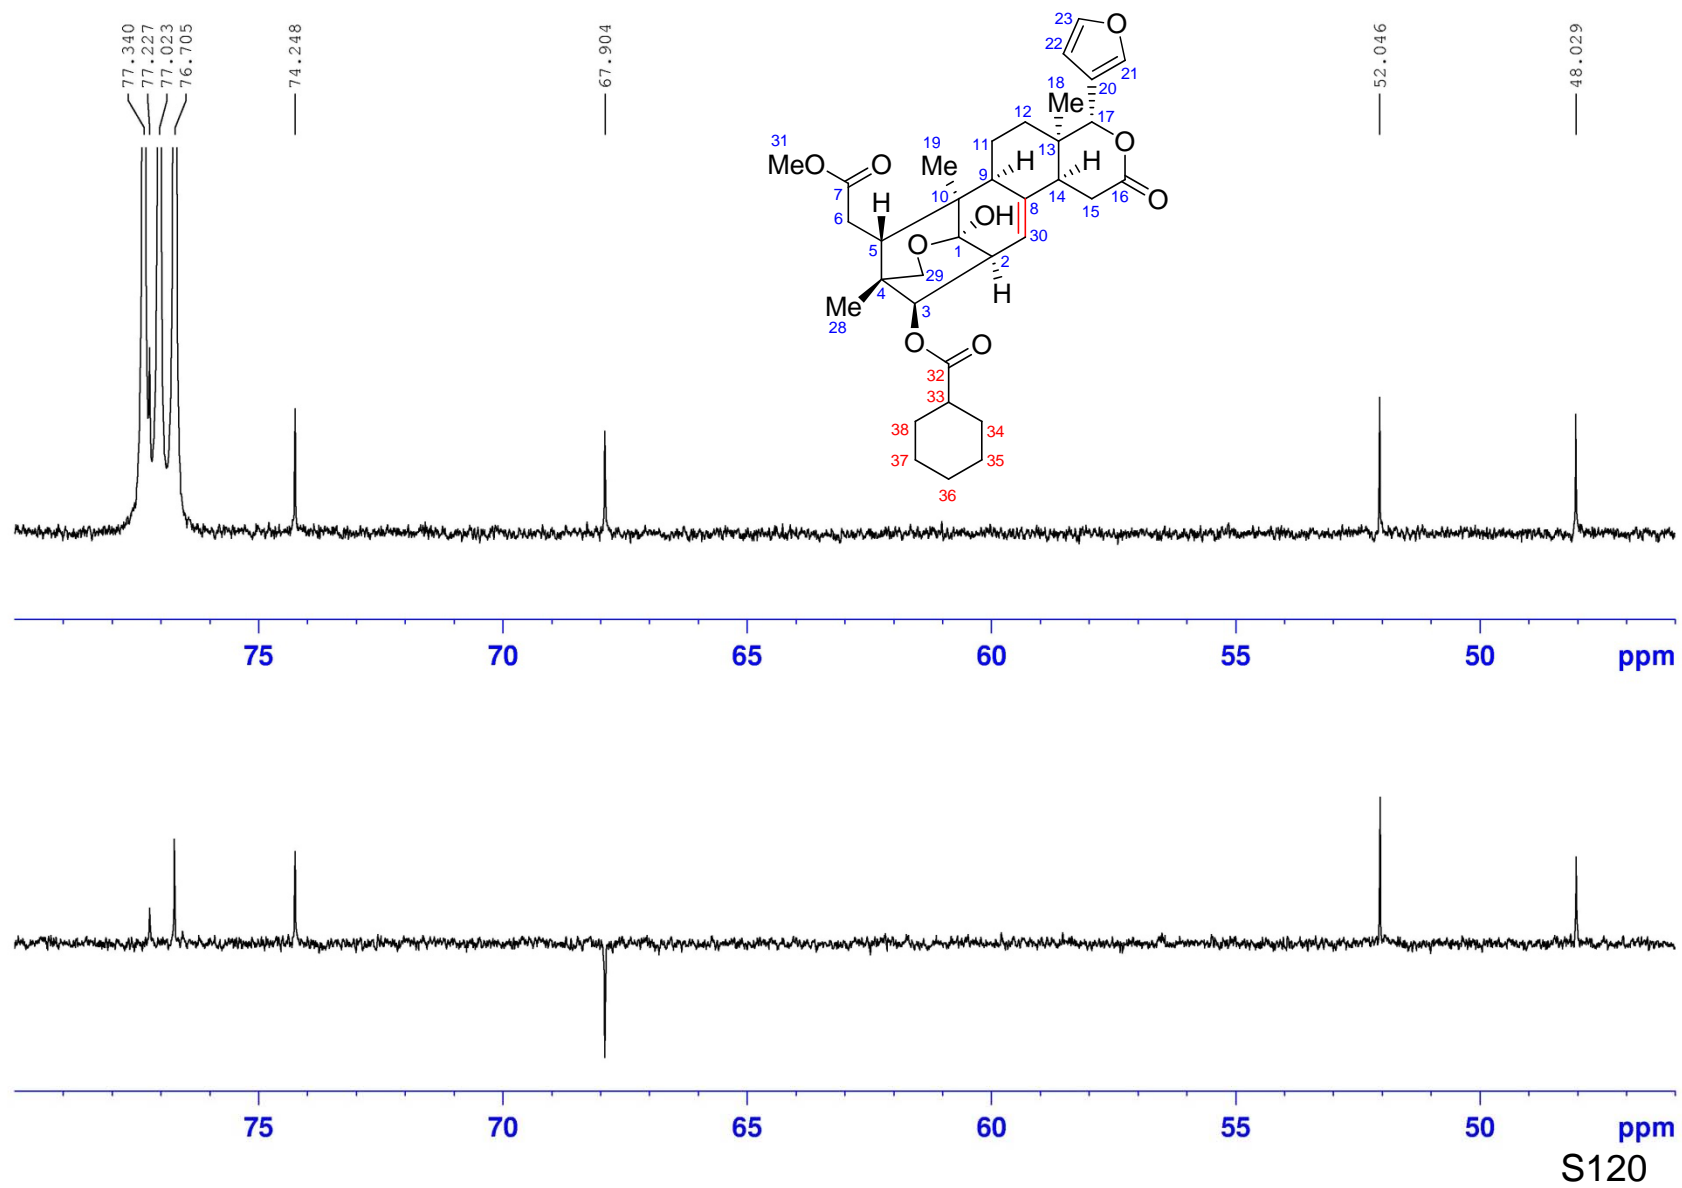

DEPT 135 spectrum of **8g** in  $\text{CDCl}_3$

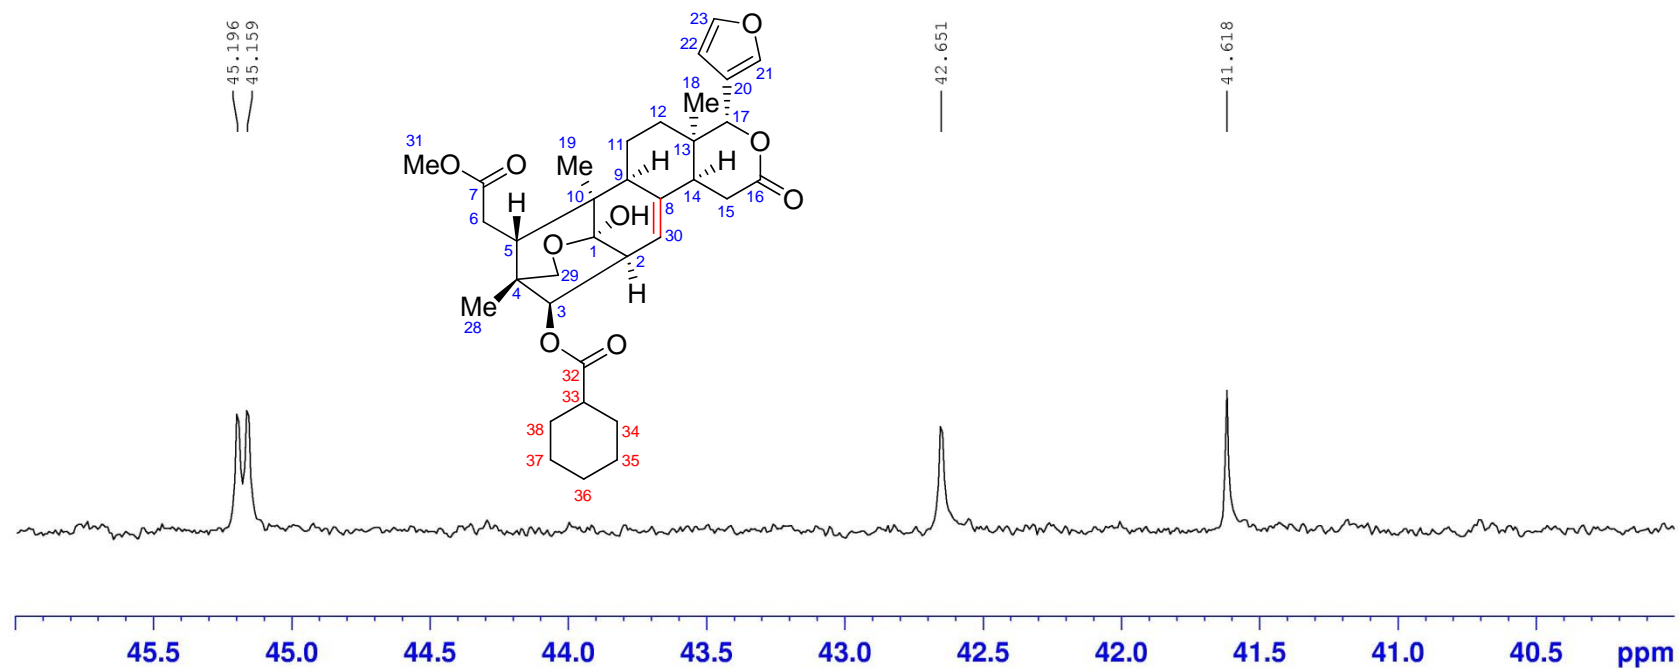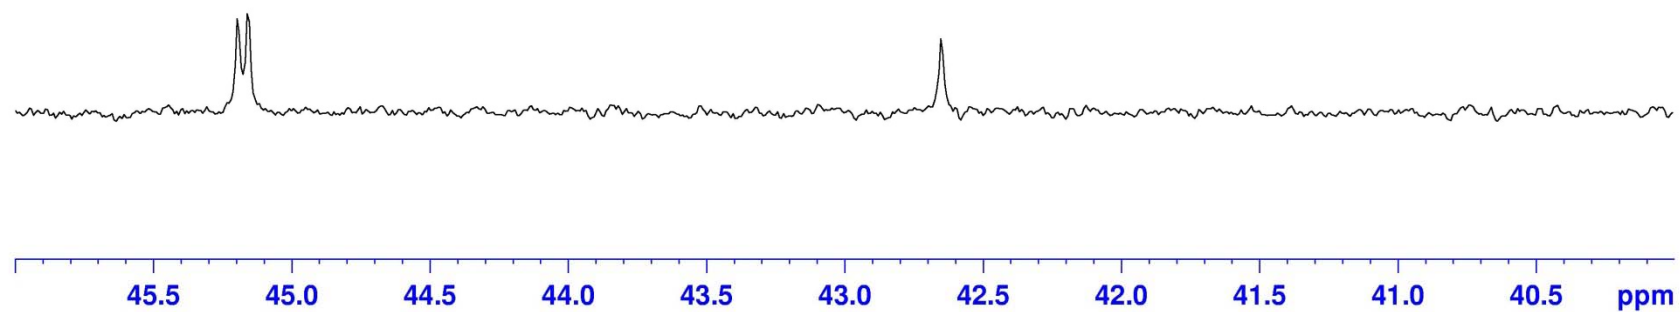

# DEPT 135 spectrum of **8g** in CDCl<sub>3</sub>

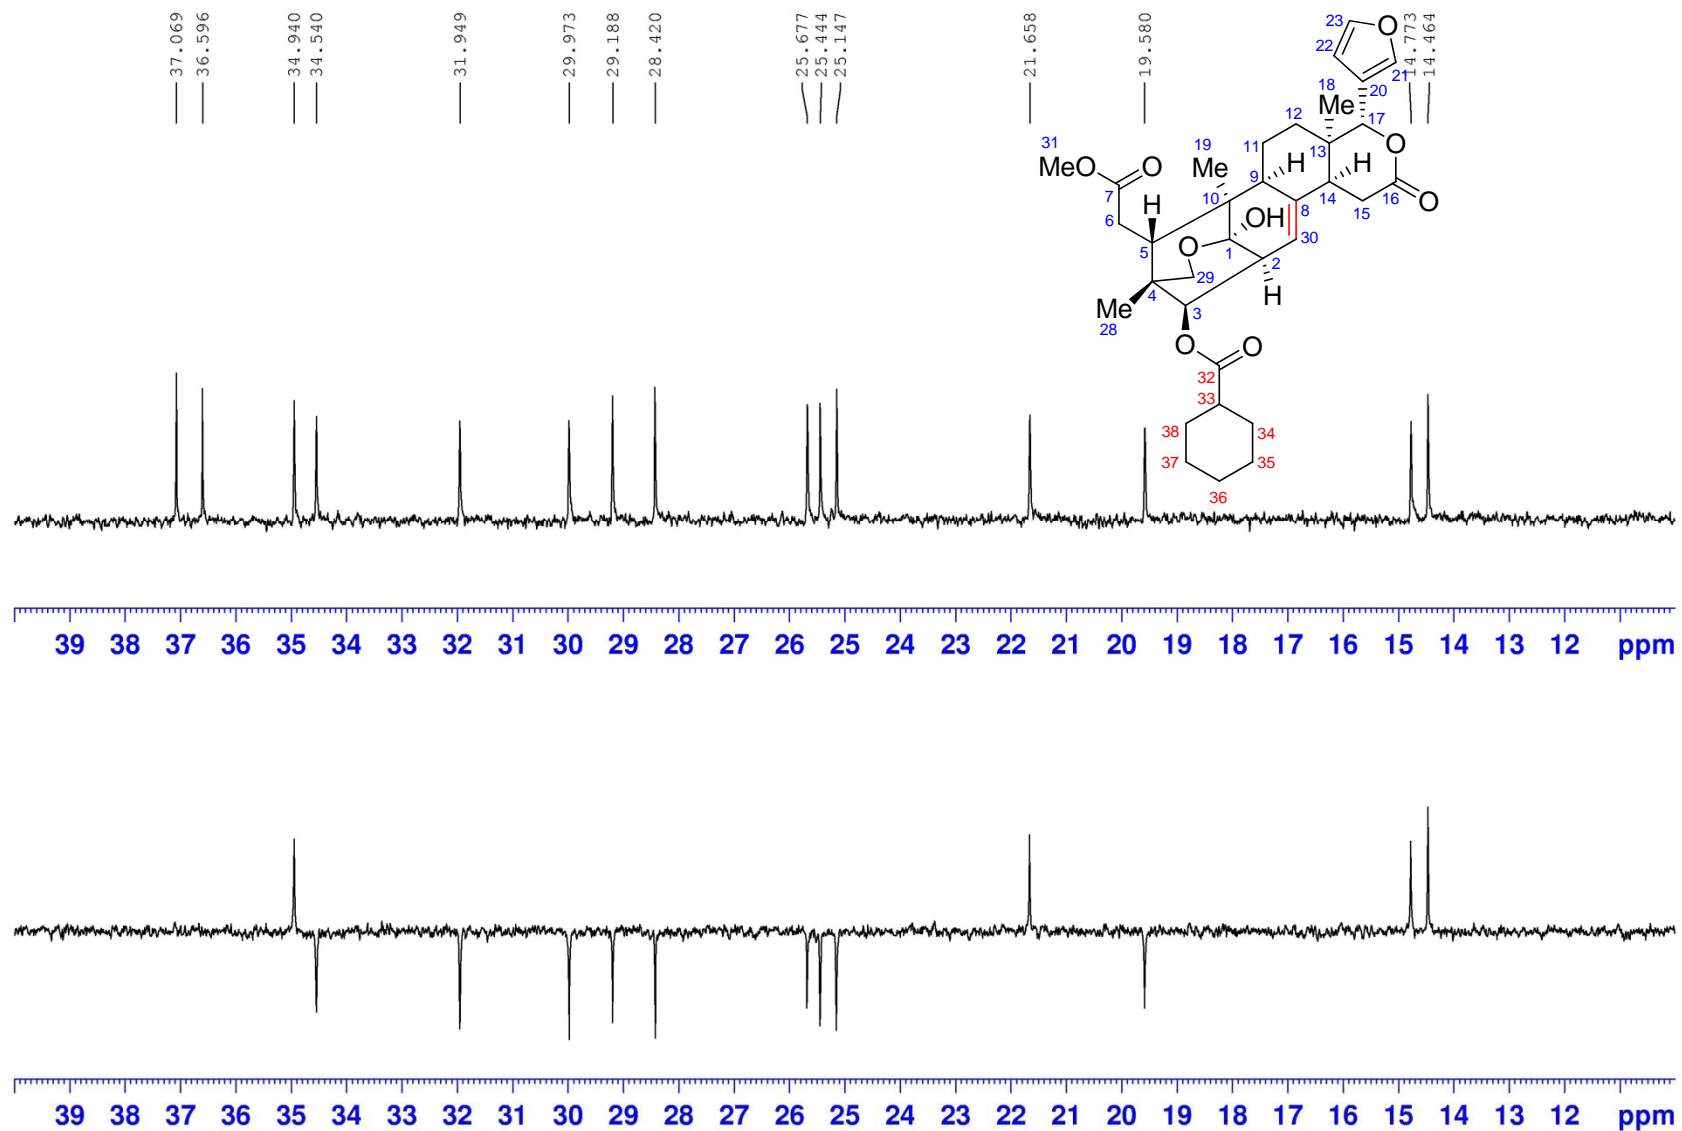



# HR-ESIMS for compound **8h**

## Generic Display Report

### Analysis Info

Analysis Name D:\Data\MS\data\201809\liwanshan\_WSD-73\_pos\_14\_01\_5571.d  
Method LC\_Direct Infusion\_pos\_100-1000mz.m  
Sample Name liwanshan\_WSD-73\_pos  
Comment

Acquisition Date 9/30/2018 4:07:58 PM

Operator SCSIO  
Instrument maXis

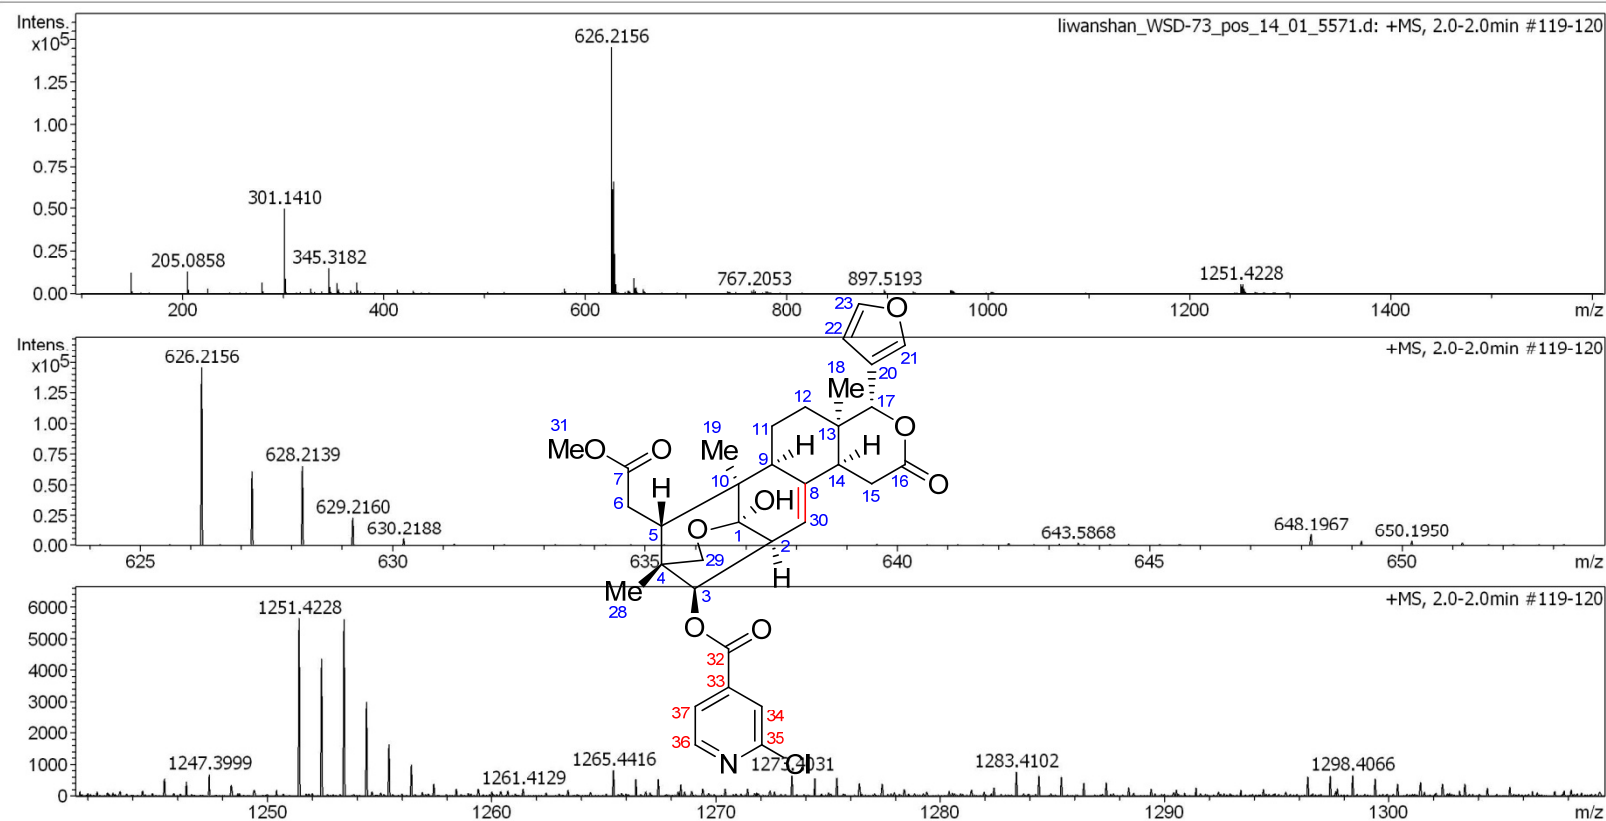

# HR-ESIMS for compound **8h**

## Mass Spectrum SmartFormula Report

### Analysis Info

Analysis Name D:\Data\MS\data\201809\liwanshan\_WSD-73\_pos\_14\_01\_5571.d  
 Method LC\_Direct Infusion\_pos\_100-1000mz.m  
 Sample Name liwanshan\_WSD-73\_pos  
 Comment

Acquisition Date 9/30/2018 4:07:58 PM  
 Operator SCSIO  
 Instrument maXis 255552.00029

### Acquisition Parameter

|             |          |                      |          |                  |           |
|-------------|----------|----------------------|----------|------------------|-----------|
| Source Type | ESI      | Ion Polarity         | Positive | Set Nebulizer    | 0.4 Bar   |
| Focus       | Active   | Set Capillary        | 4500 V   | Set Dry Heater   | 180 °C    |
| Scan Begin  | 100 m/z  | Set End Plate Offset | -500 V   | Set Dry Gas      | 4.0 l/min |
| Scan End    | 2000 m/z | Set Charging Voltage | 0 V      | Set Divert Valve | Waste     |
|             |          | Set Corona           | 0 nA     | Set APCI Heater  | 0 °C      |

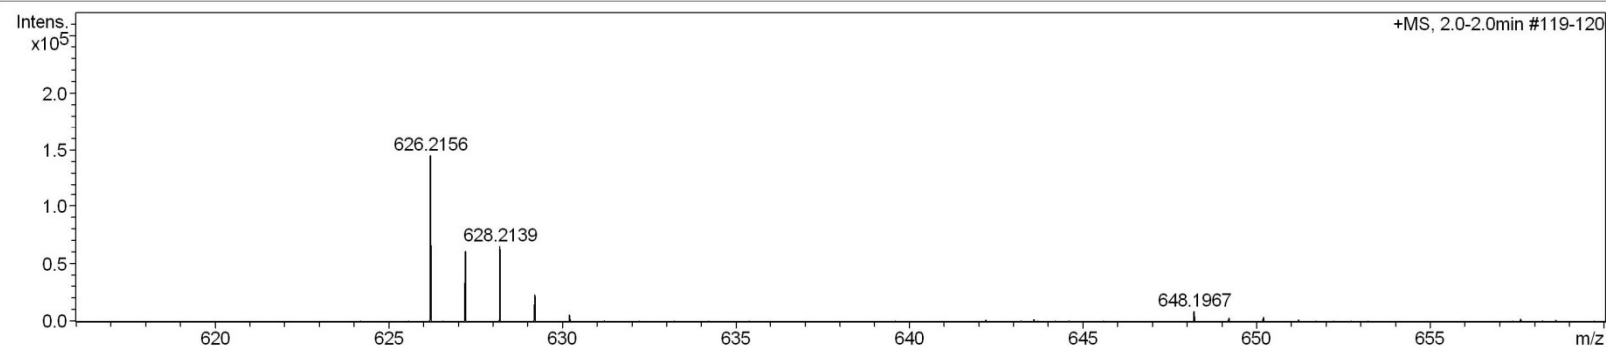

| Meas. m/z | # | Ion Formula   | Score  | m/z      | err [ppm] | err [mDa] | mSigma | rdb  | e <sup>-</sup> Conf | N-Rule |
|-----------|---|---------------|--------|----------|-----------|-----------|--------|------|---------------------|--------|
| 626.2156  | 1 | C33H37ClNO9   | 100.00 | 626.2151 | -0.8      | -0.5      | 31.6   | 15.5 | even                | ok     |
| 648.1967  | 1 | C33H36ClNNaO9 | 100.00 | 648.1971 | 0.5       | 0.3       | 26.0   | 15.5 | even                | ok     |

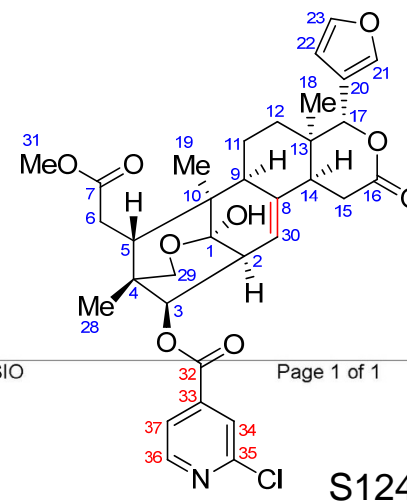

$^1\text{H}$  NMR (400 MHz) spectrum of **8h** in  $\text{CDCl}_3$

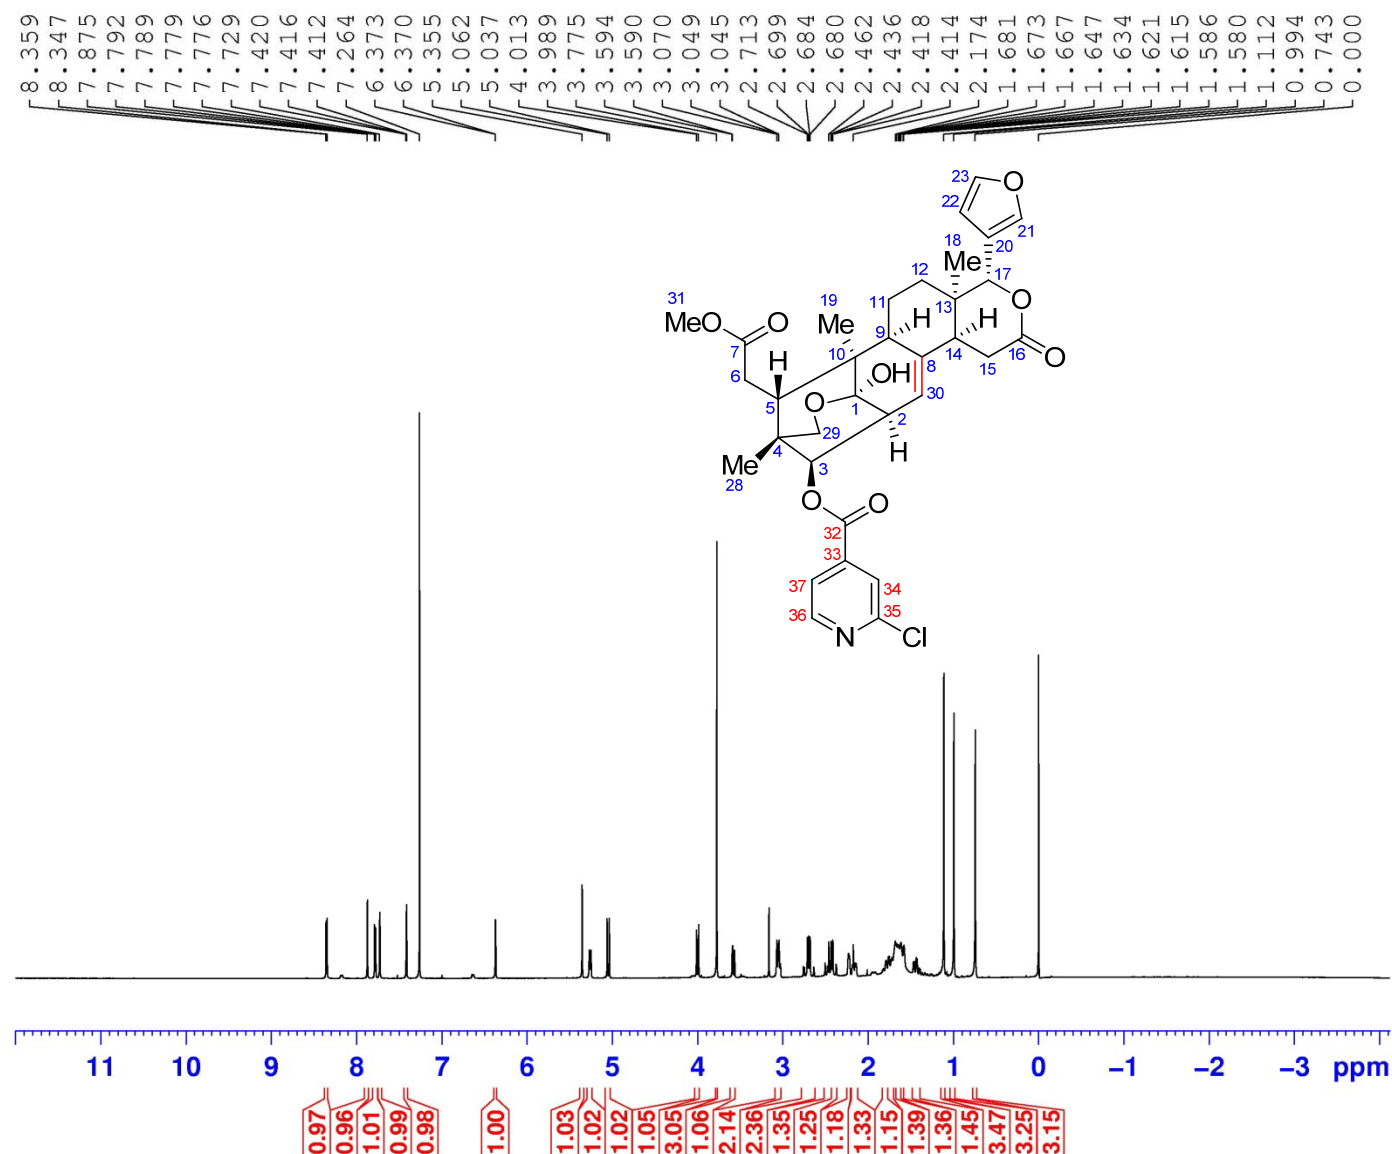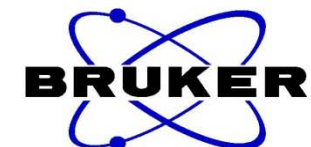

```

NAME      czc-1-CH3-2-Cl-yiyansuan
EXPNO     1
PROCNO    1
Date_     20171016
Time      15.29
INSTRUM   spect
PROBHD    5 mm CFPBBO BB
PULPROG   zg30
TD        65536
SOLVENT   CDCl3
NS        16
DS        2
SWH        8223.685 Hz
FIDRES     0.125483 Hz
AQ        3.9846387 sec
RG         208.5
DW         60.800 usec
DE         10.00 usec
TE         297.0 K
D1         1.00000000 sec
TD0        1

===== CHANNEL f1 =====
SFO1      400.1324710 MHz
NUC1      1H
P1        11.50 usec
SI        65536
SF        400.1300082 MHz
WDW        EM
SSB        0
LB         0.30 Hz
GB         0
PC         1.00
    
```

$^1\text{H}$  NMR (400 MHz) spectrum of **8h** in  $\text{CDCl}_3$

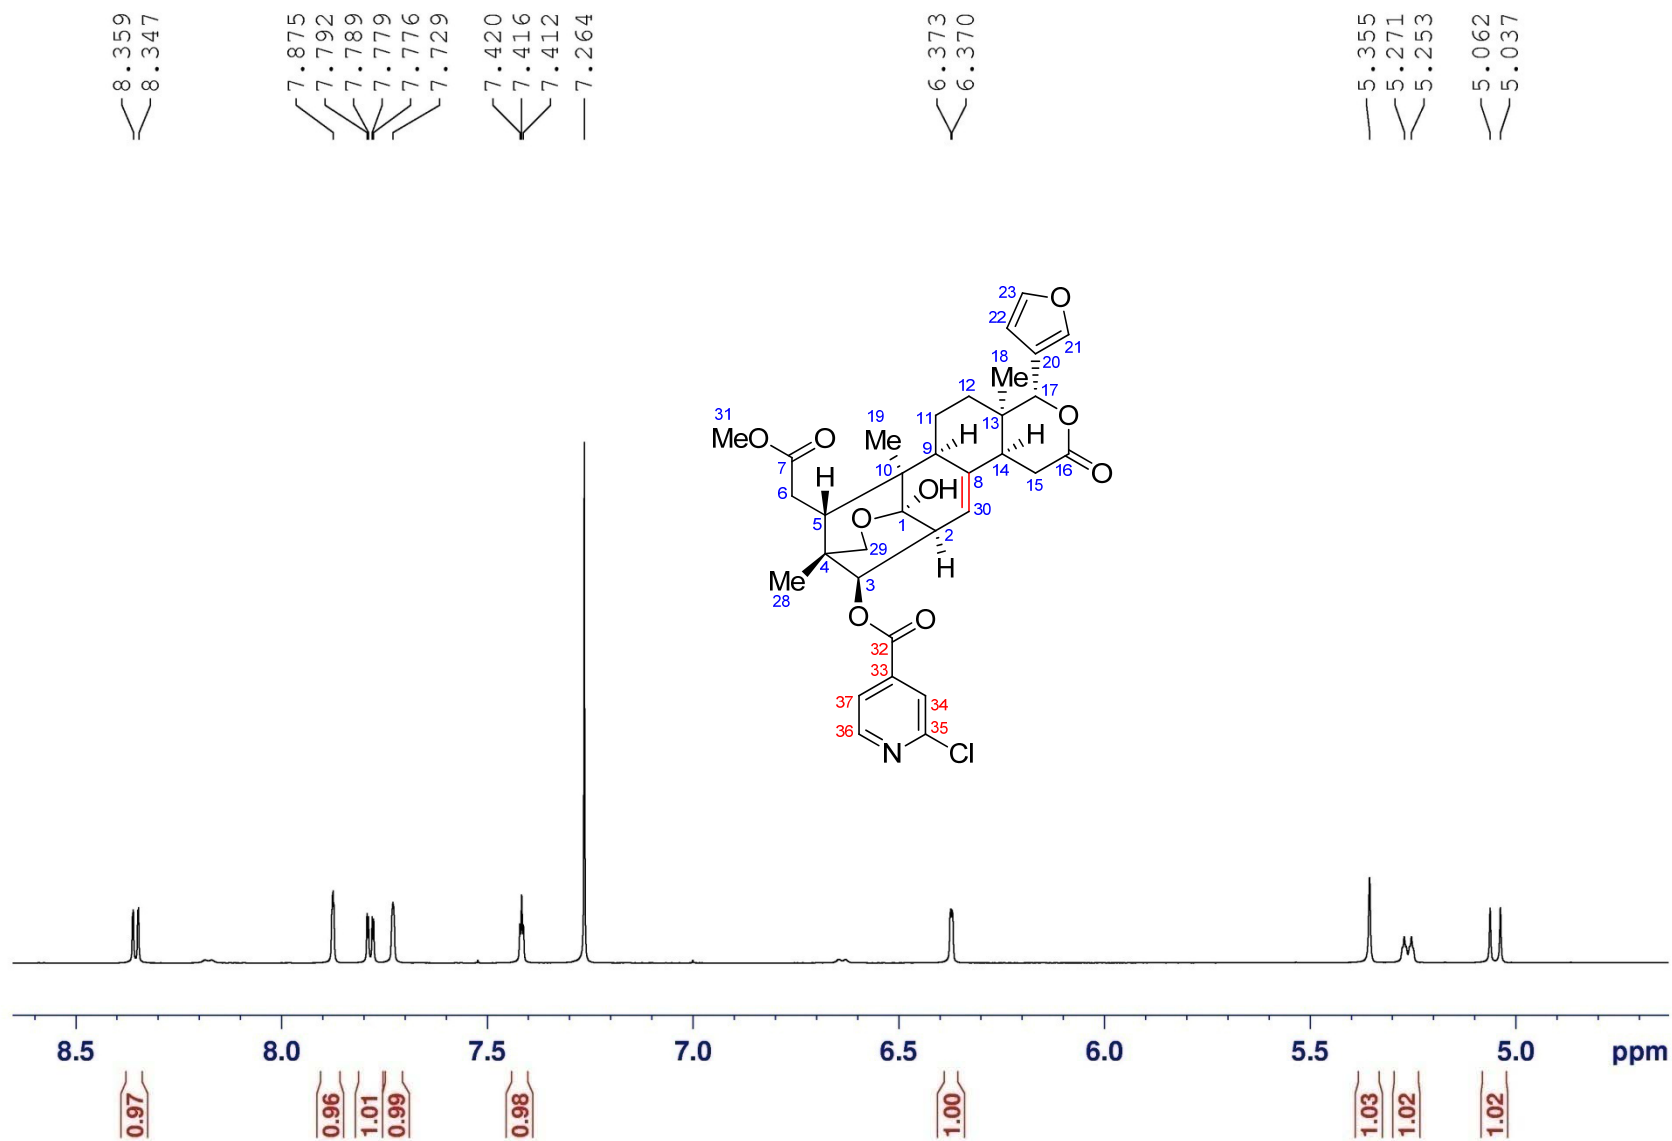

$^1\text{H}$  NMR (400 MHz) spectrum of **8h** in  $\text{CDCl}_3$

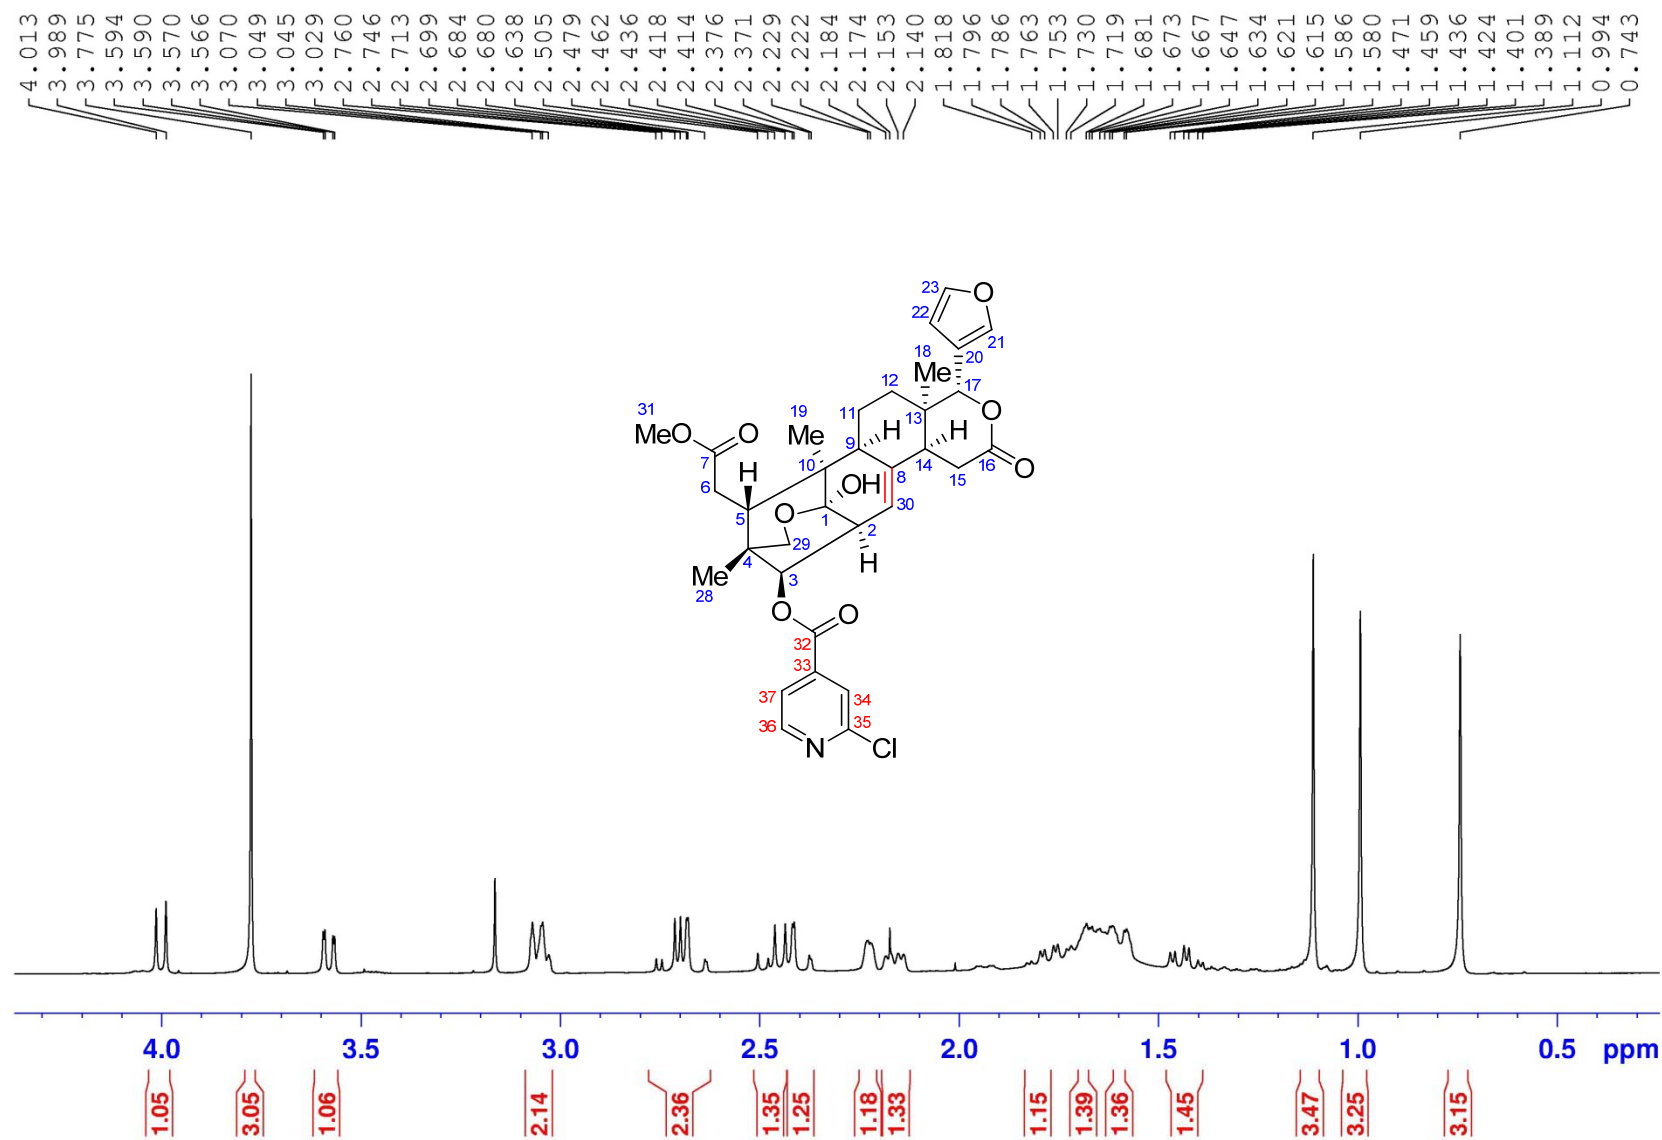

S127

$^{13}\text{C}$  NMR (100 MHz) spectrum of **8h** in  $\text{CDCl}_3$

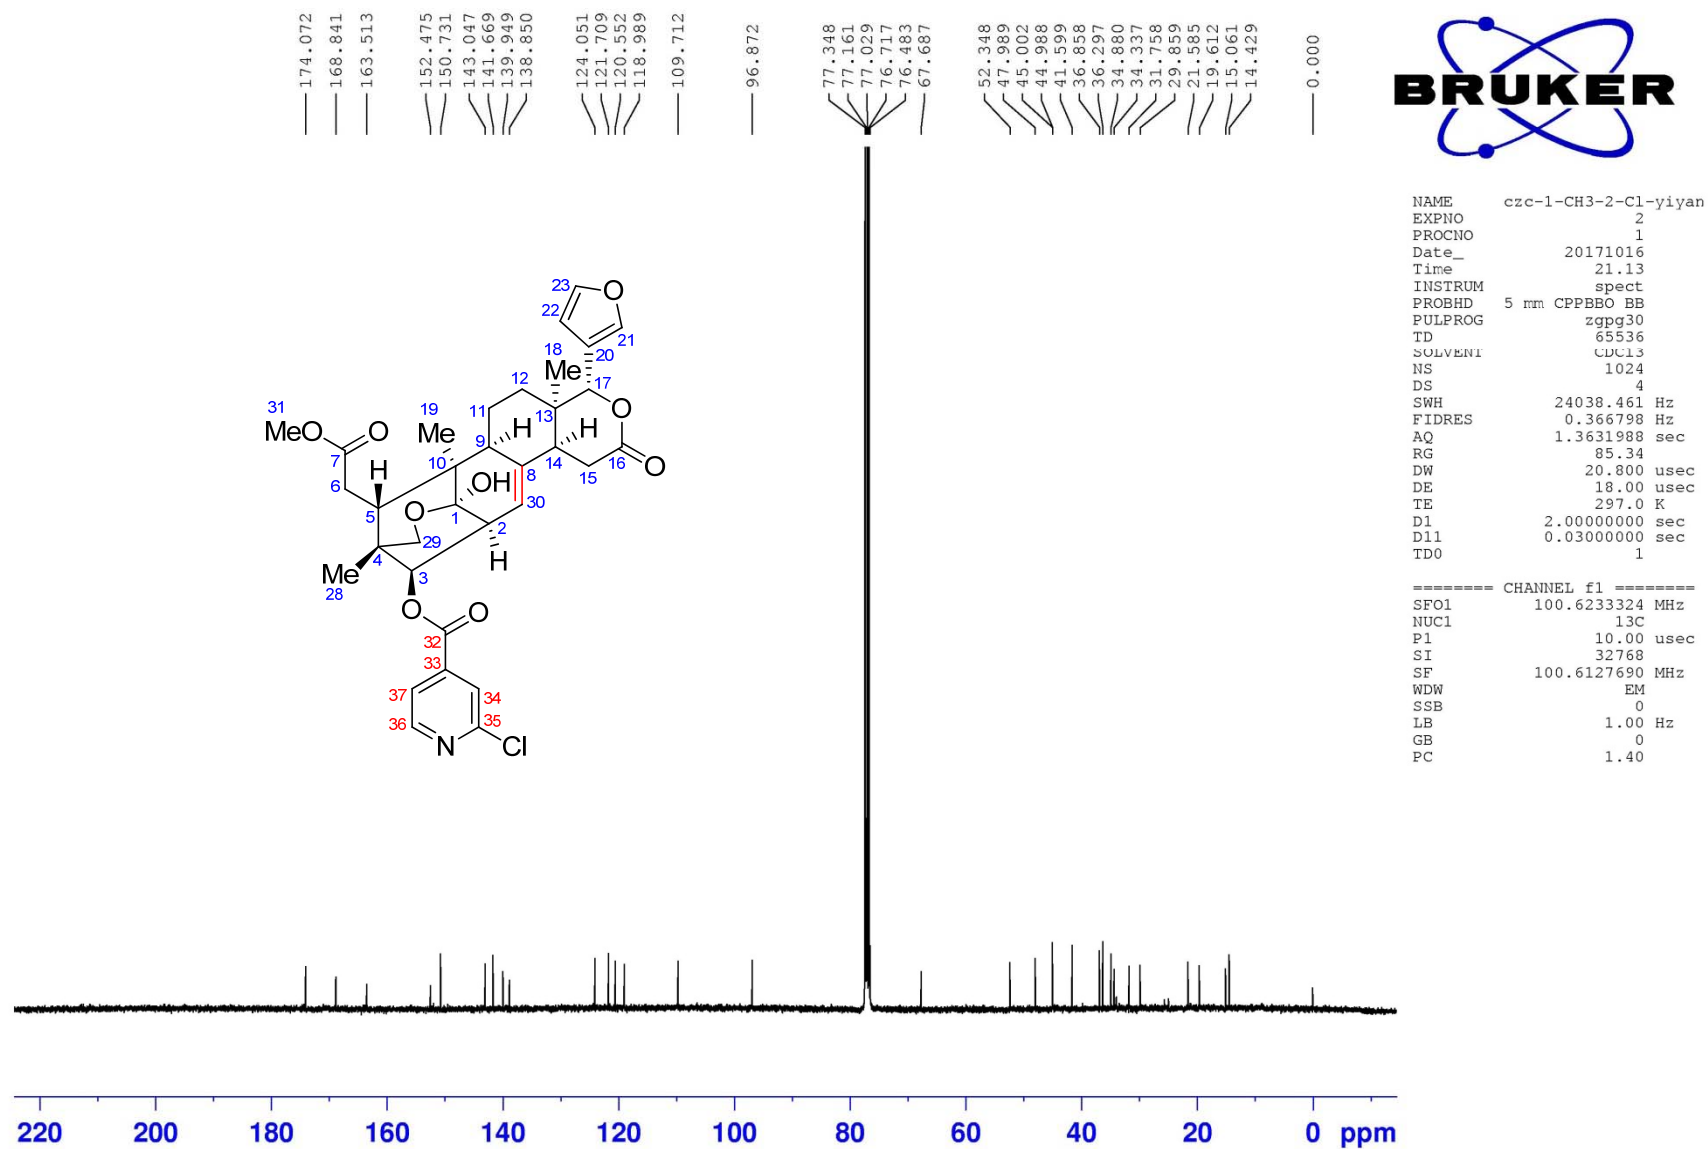

$^{13}\text{C}$  NMR (100 MHz) spectrum of **8h** in  $\text{CDCl}_3$

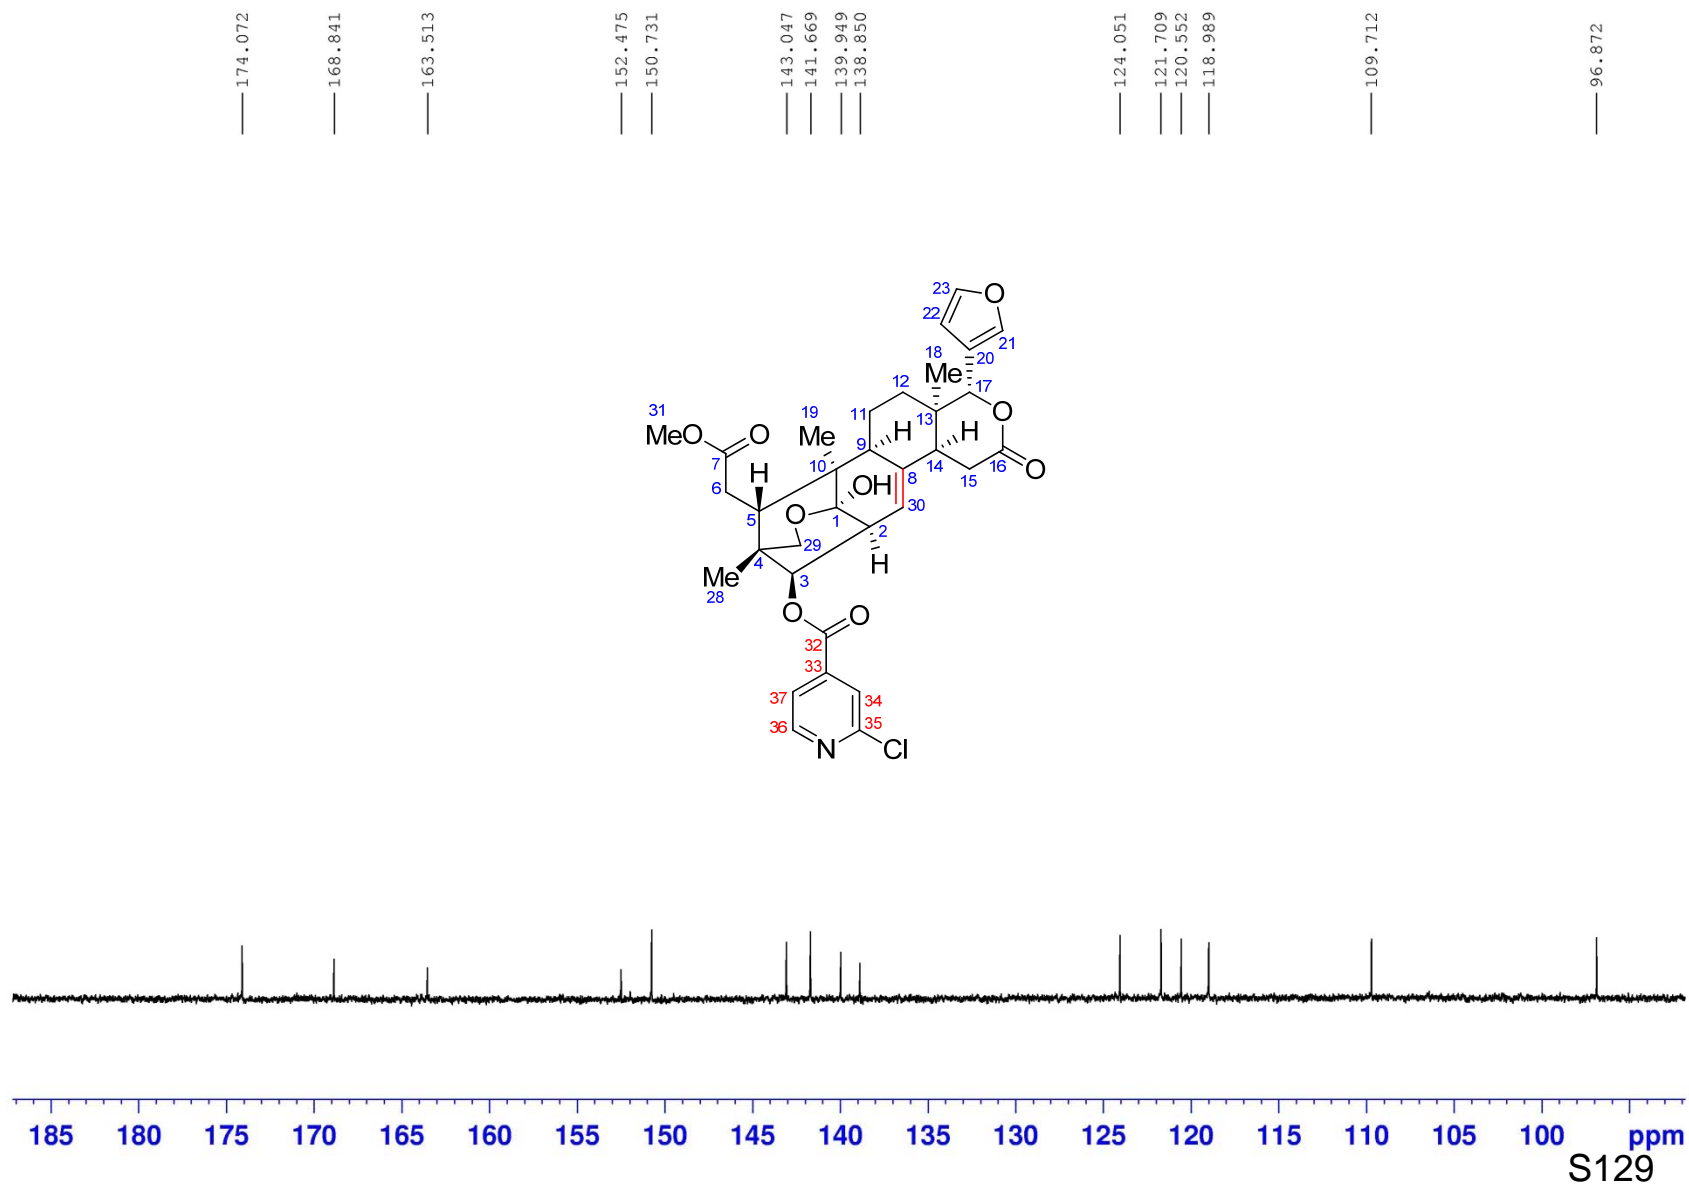

$^{13}\text{C}$  NMR (100 MHz) spectrum of **8h** in  $\text{CDCl}_3$

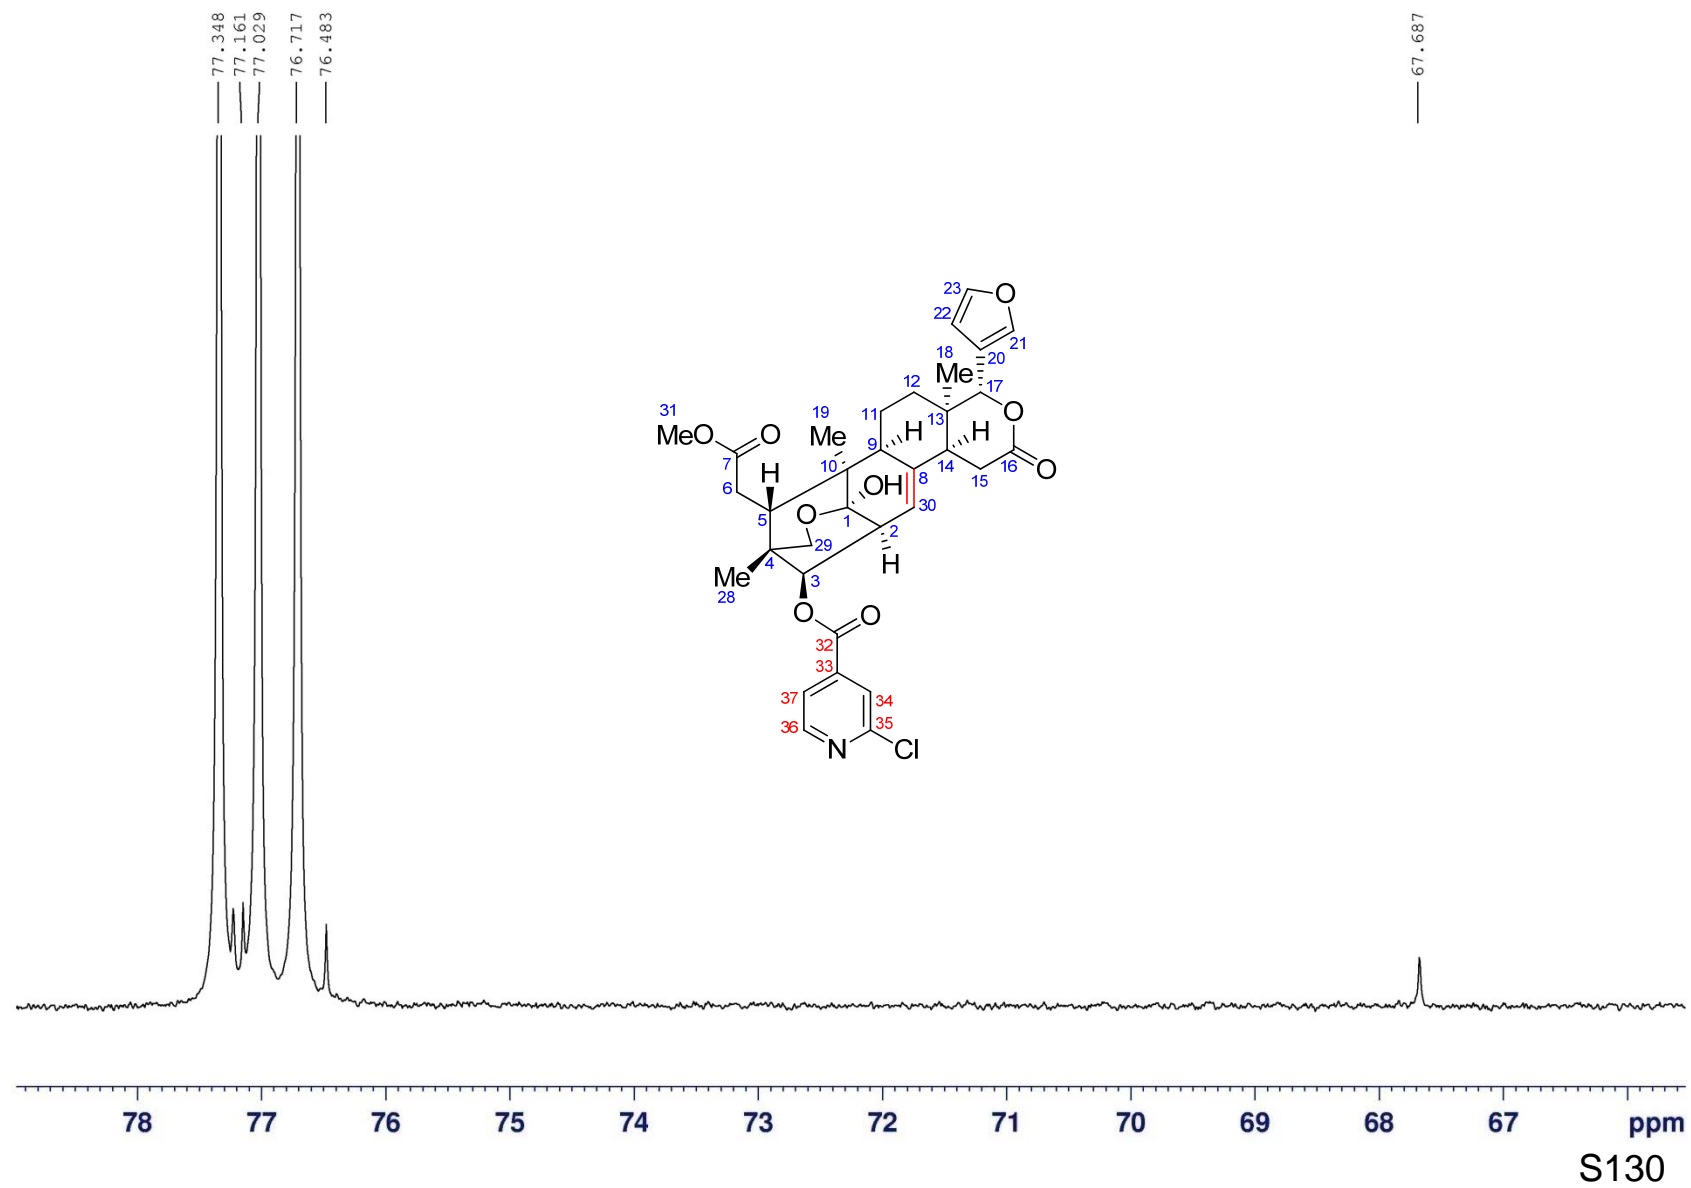



$^{13}\text{C}$  NMR (100 MHz) spectrum of **8h** in  $\text{CDCl}_3$

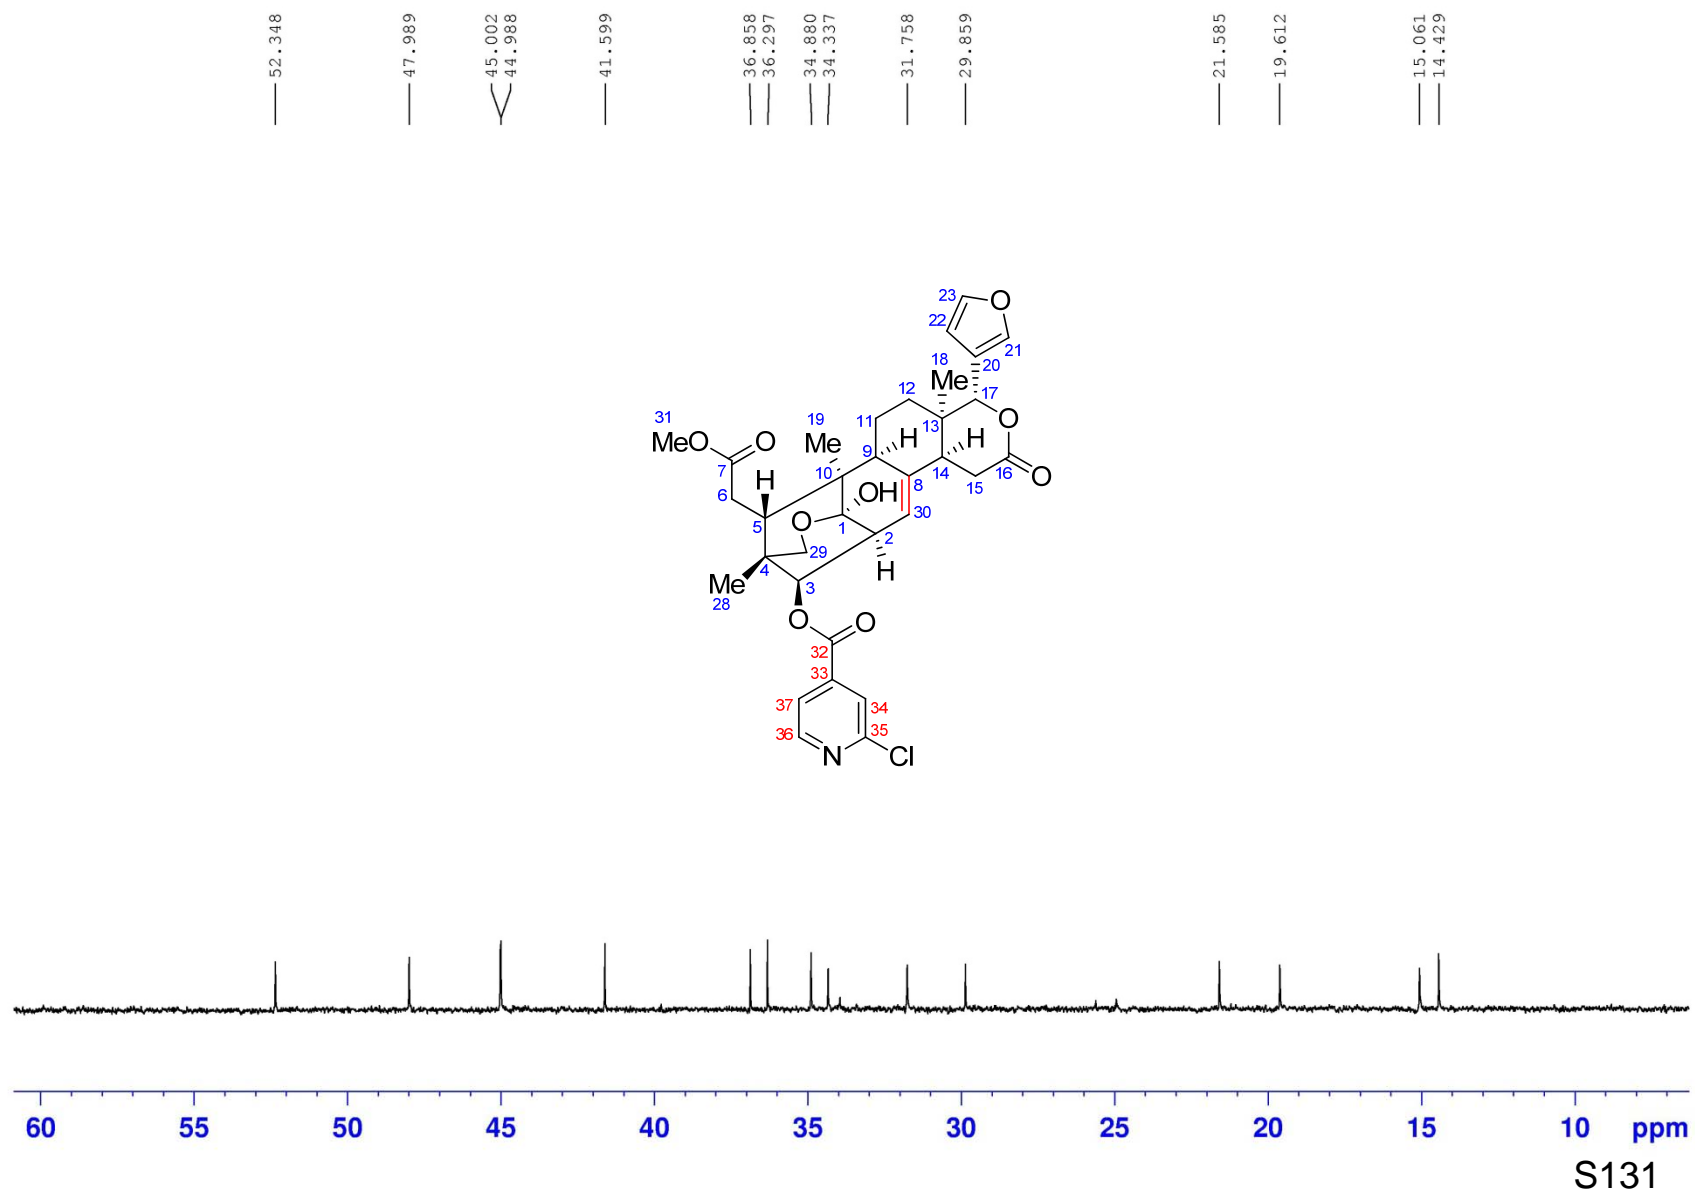

# DEPT 135 spectrum of **8h** in CDCl<sub>3</sub>

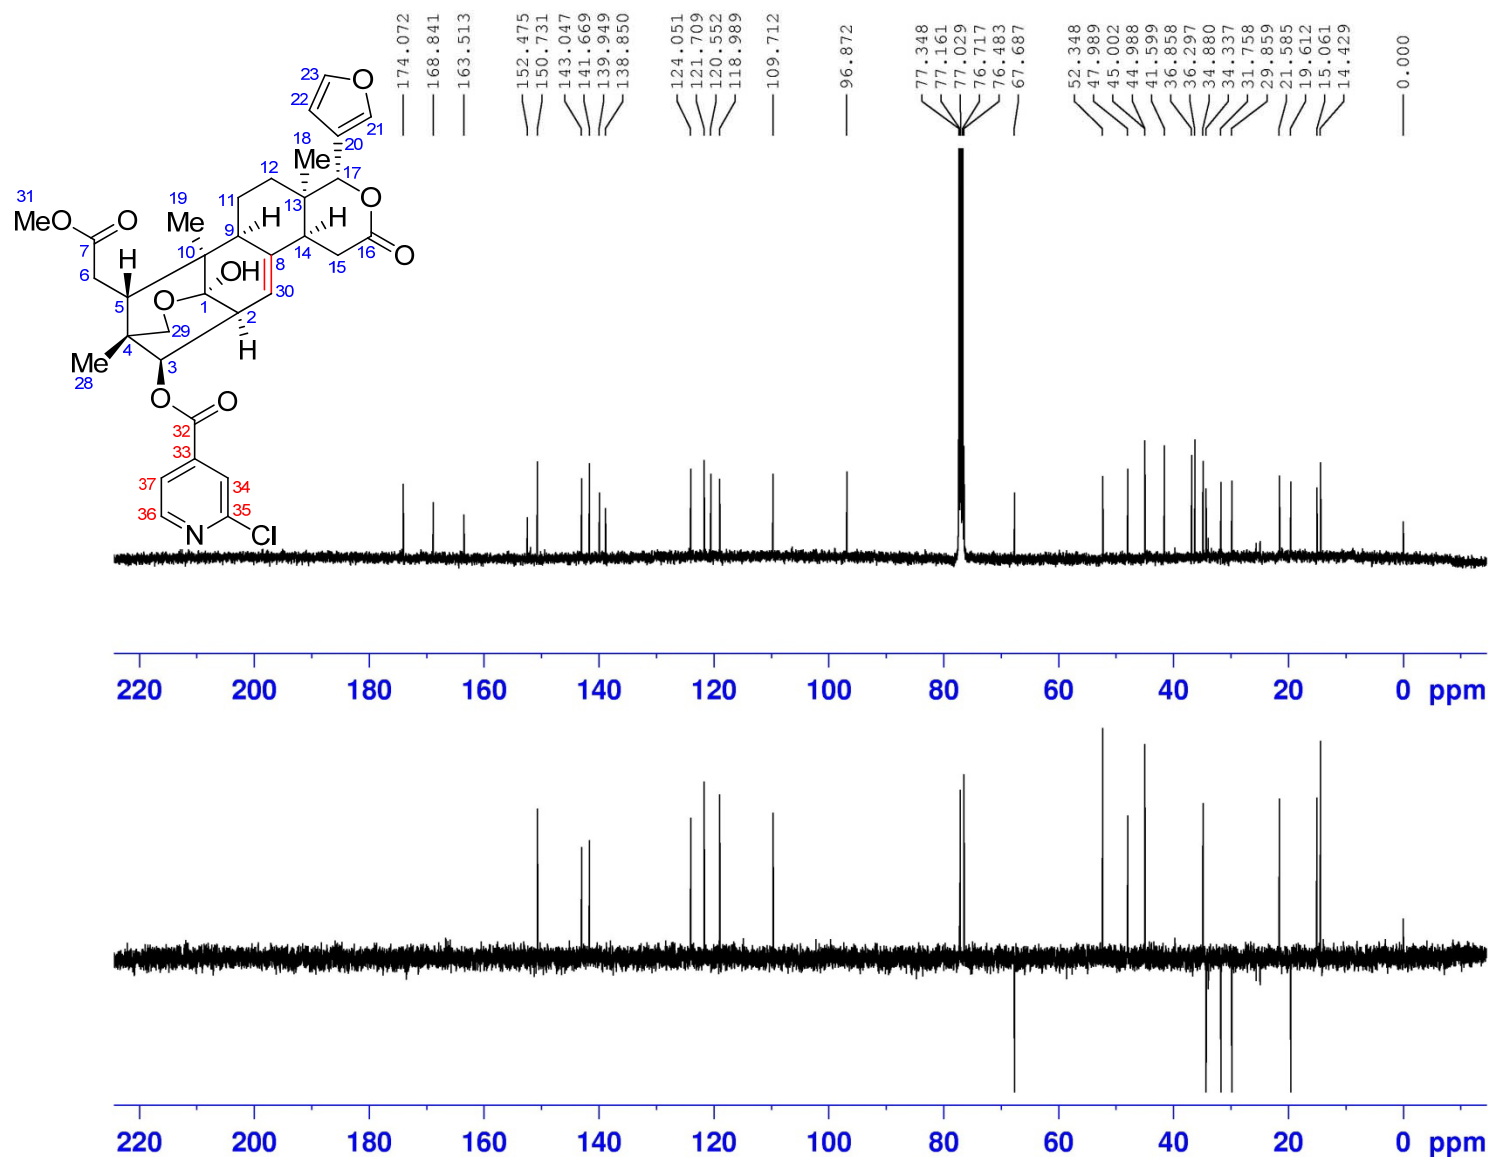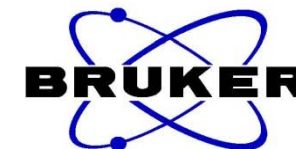

```

NAME      czc-1-CH3-2-Cl-yiya
EXPNO     3
PROCNO    1
Date_     20171016
Time      21.31
INSTRUM   spect
PROBHD    5 mm CPPBBO BB
PULPROG   deptsp135
TD         65536
SOLVENT   CDCl3
NS         300
DS         4
SWH        24038.461 Hz
FIDRES     0.366798 Hz
AQ         1.3631988 sec
RG         130.26
DW         20.800 usec
DE         18.00 usec
TE         297.0 K
CNSTZ     145.0000000
D1         2.00000000 sec
D2         0.00344828 sec
D12        0.00002000 sec
TD0        1
    
```

```

===== CHANNEL f1 =====
SF01      100.6233324 MHz
NUC1       13C
P1         10.00 usec
P13        2000.00 usec
SI         32768
SF         100.6127691 MHz
WDW        EM
SSB        0
LB         1.00 Hz
GB         0
PC         1.40
    
```

# DEPT 135 spectrum of **8h** in CDCl<sub>3</sub>

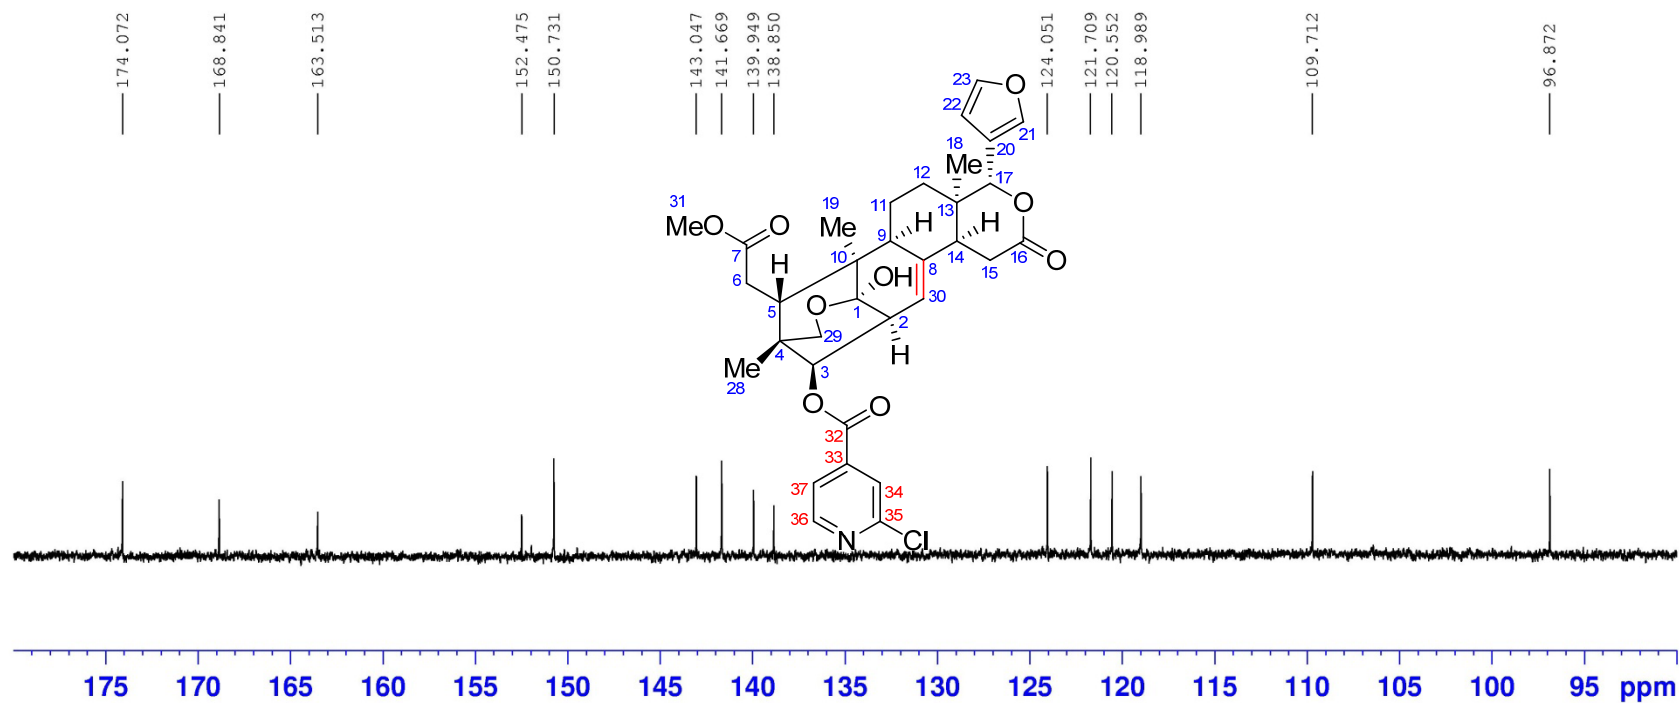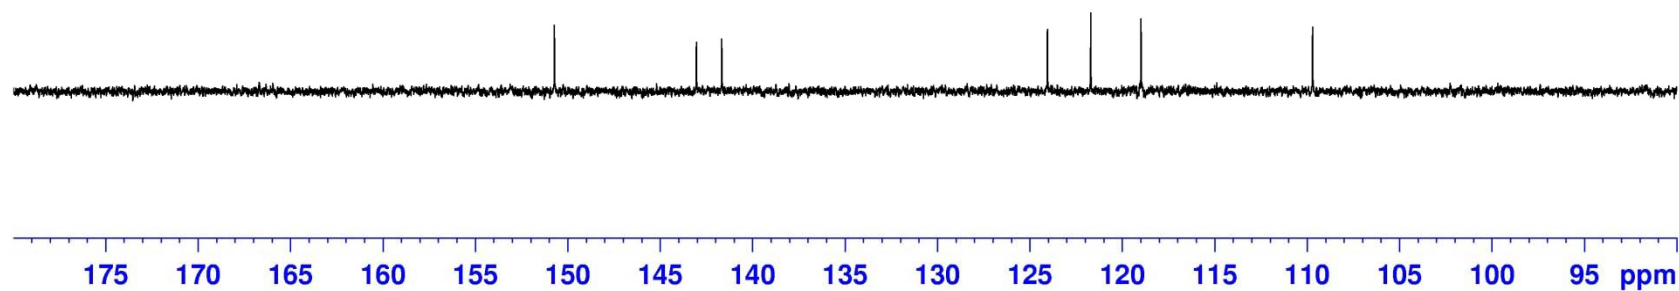

DEPT 135 spectrum of **8h** in  $\text{CDCl}_3$

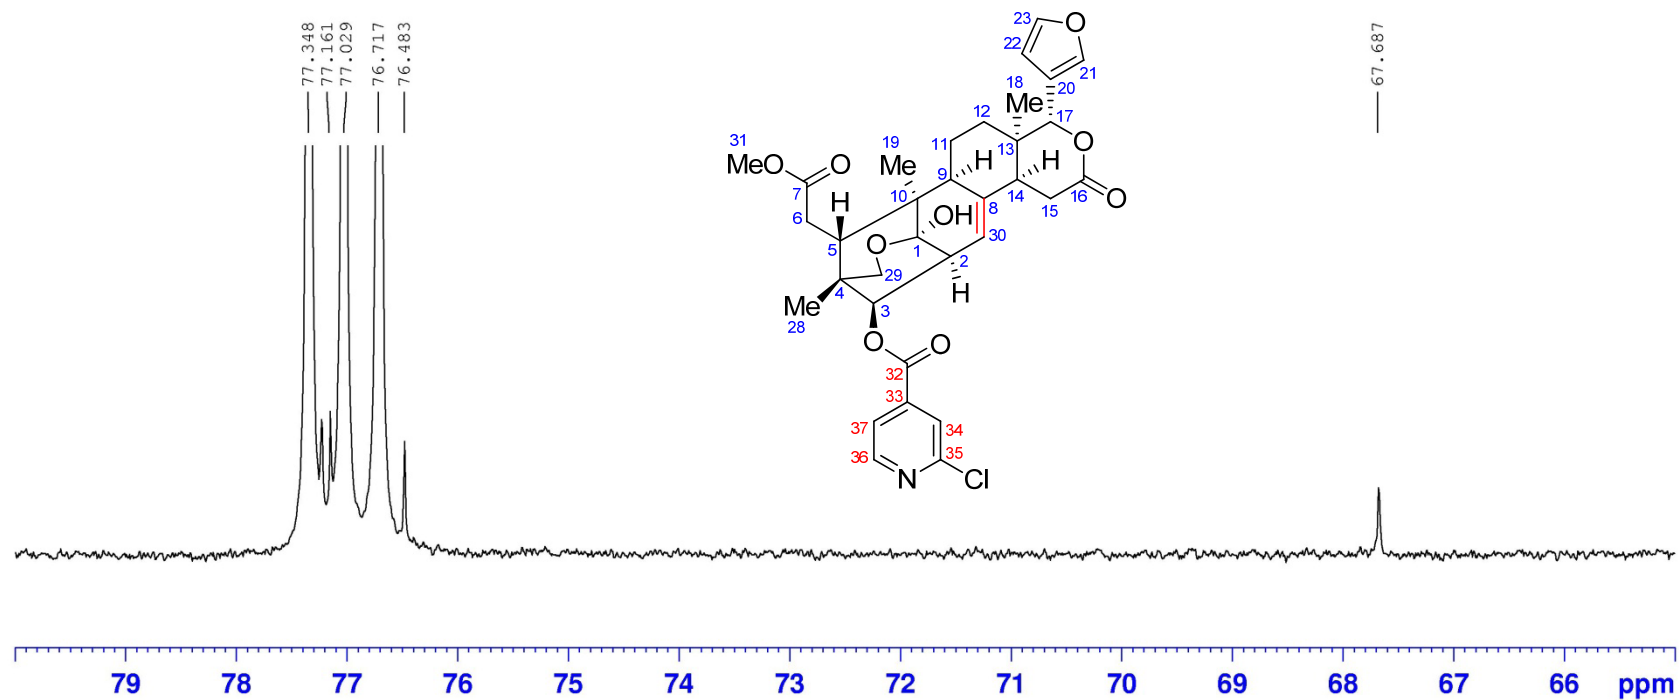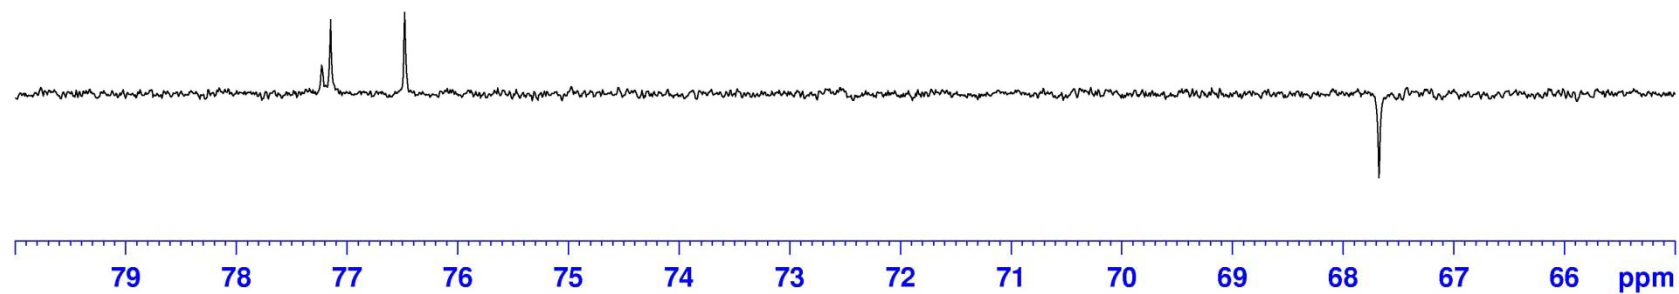

# DEPT 135 spectrum of **8h** in CDCl<sub>3</sub>

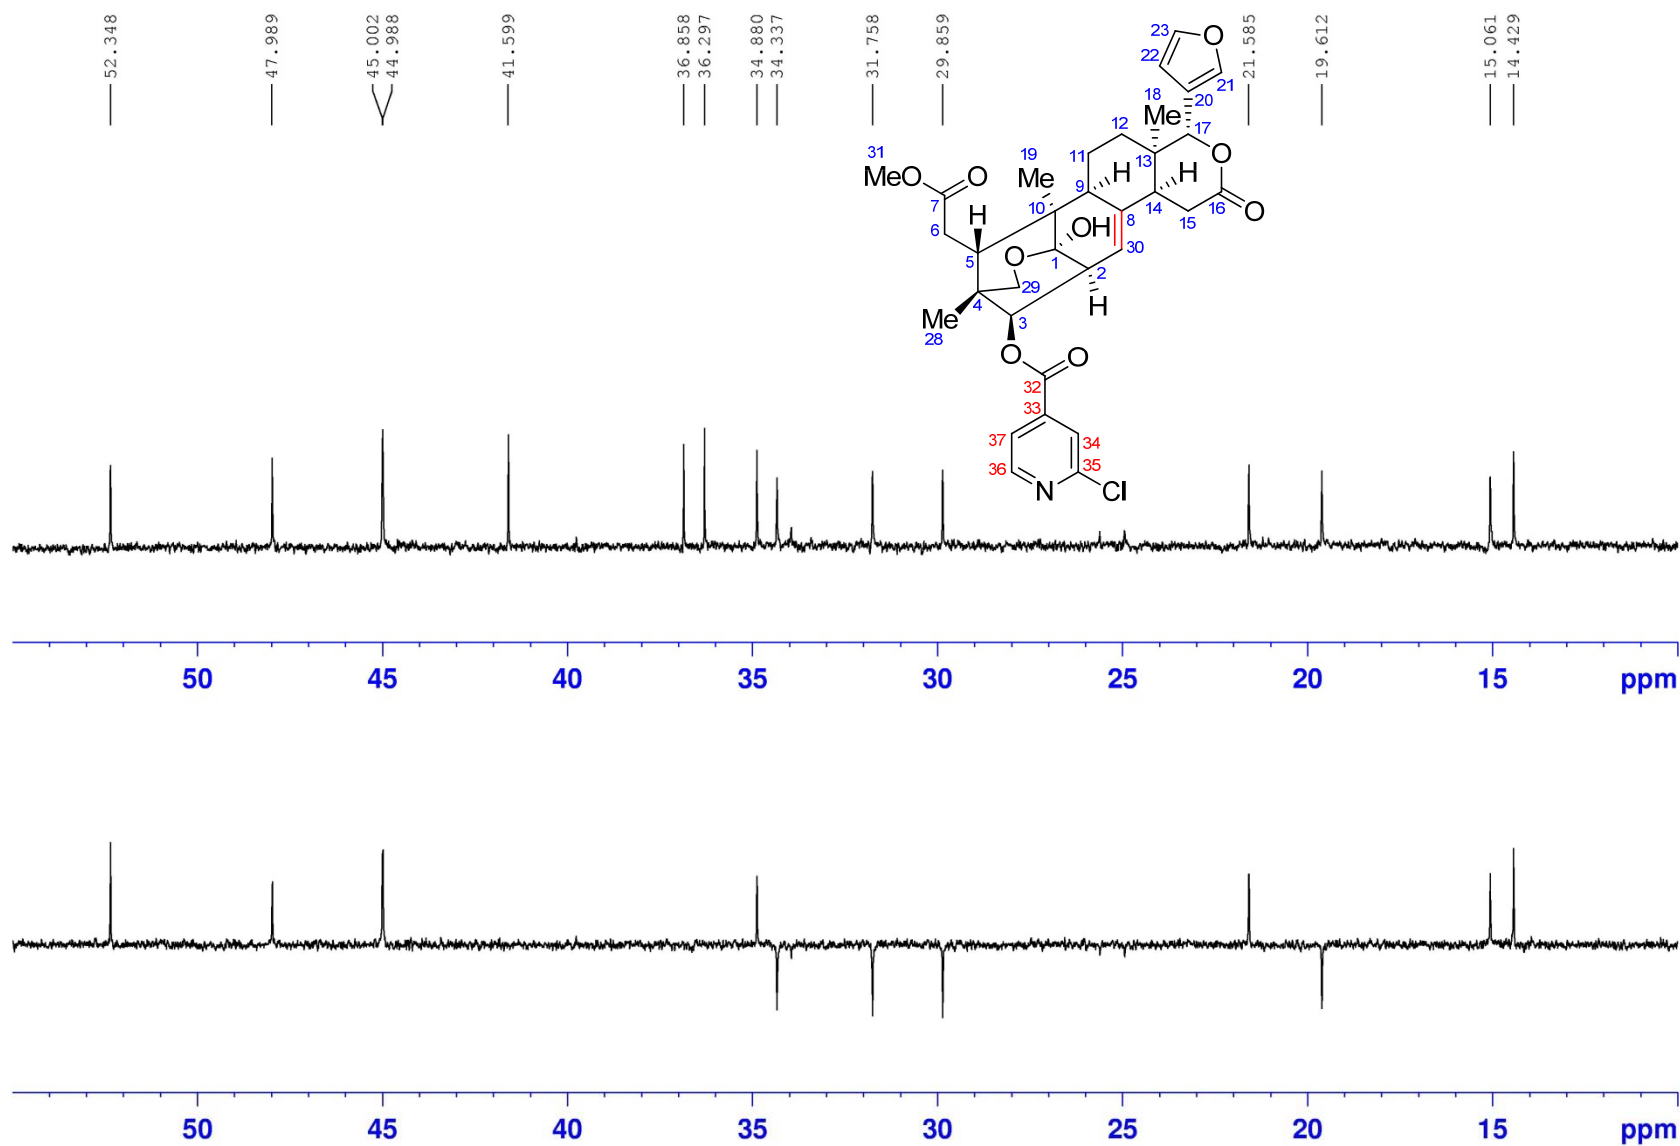

# HR-ESIMS for compound **8i**

## Generic Display Report

### Analysis Info

Analysis Name D:\Data\MS\data\201809\liwanshan\_WSD-75\_pos\_20\_01\_5581.d  
Method LC\_Direct Infusion\_pos\_100-1000mz.m  
Sample Name liwanshan\_WSD-75\_pos  
Comment

Acquisition Date 9/30/2018 6:26:21 PM

Operator SCSIO  
Instrument maXis

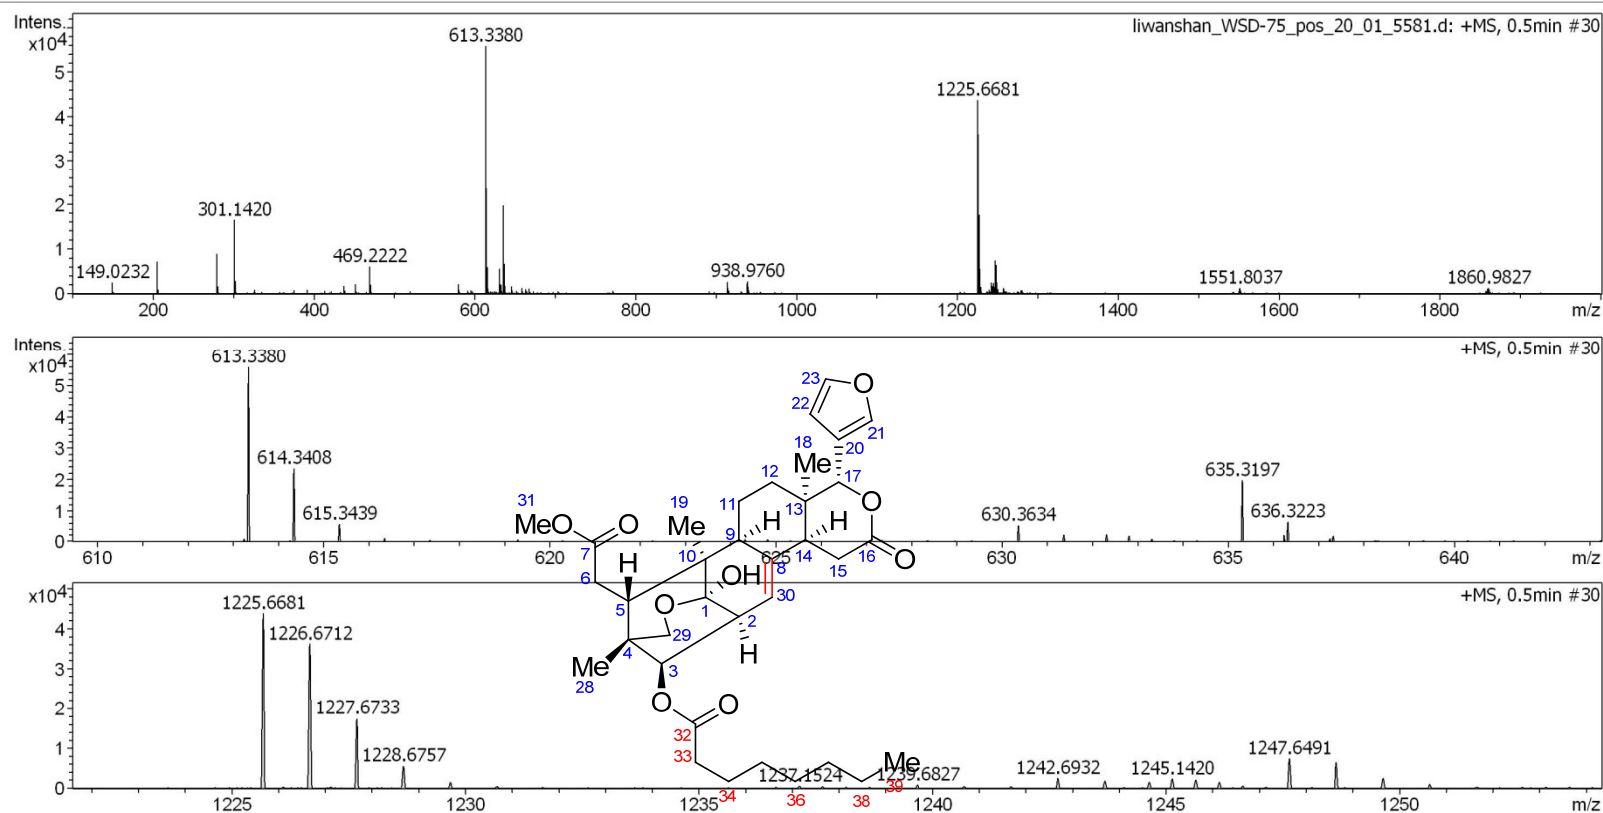

# HR-ESIMS for compound **8i**

## Mass Spectrum SmartFormula Report

### Analysis Info

Analysis Name D:\Data\MS\data\201809\liwanshan\_WSD-75\_pos\_20\_01\_5581.d  
 Method LC\_Direct Infusion\_pos\_100-1000mz.m  
 Sample Name liwanshan\_WSD-75\_pos  
 Comment

Acquisition Date 9/30/2018 6:26:21 PM  
 Operator SCSIO  
 Instrument maXis 255552.00029

### Acquisition Parameter

|             |          |                      |          |                  |           |
|-------------|----------|----------------------|----------|------------------|-----------|
| Source Type | ESI      | Ion Polarity         | Positive | Set Nebulizer    | 0.4 Bar   |
| Focus       | Active   | Set Capillary        | 4500 V   | Set Dry Heater   | 180 °C    |
| Scan Begin  | 100 m/z  | Set End Plate Offset | -500 V   | Set Dry Gas      | 4.0 l/min |
| Scan End    | 2000 m/z | Set Charging Voltage | 0 V      | Set Divert Valve | Waste     |
|             |          | Set Corona           | 0 nA     | Set APCI Heater  | 0 °C      |

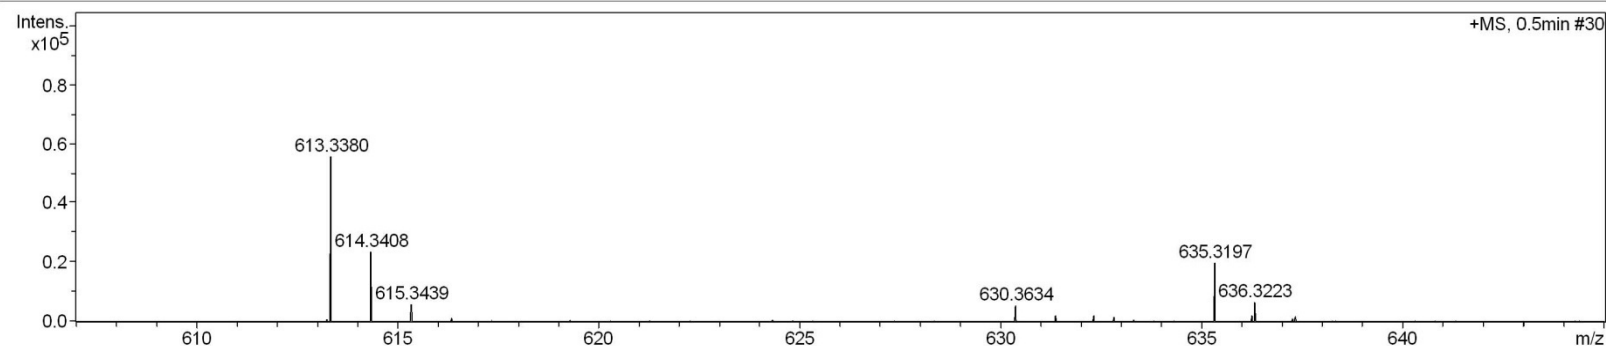

| Meas. m/z | # | Ion Formula | Score  | m/z       | err [ppm] | err [mDa] | mSigma | rdb  | e <sup>-</sup> Conf | N-Rule |
|-----------|---|-------------|--------|-----------|-----------|-----------|--------|------|---------------------|--------|
| 613.3380  | 1 | C35H49O9    | 100.00 | 613.3371  | -1.5      | -0.9      | 19.6   | 11.5 | even                | ok     |
| 635.3197  | 1 | C35H48NaO9  | 100.00 | 635.3191  | -1.0      | -0.6      | 25.4   | 11.5 | even                | ok     |
| 1225.6681 | 1 | C70H97O18   | 100.00 | 1225.6669 | -1.0      | -1.2      | 36.0   | 22.5 | even                | ok     |
| 1247.6491 | 1 | C70H96NaO18 | 100.00 | 1247.6489 | -0.2      | -0.3      | 39.1   | 22.5 | even                | ok     |

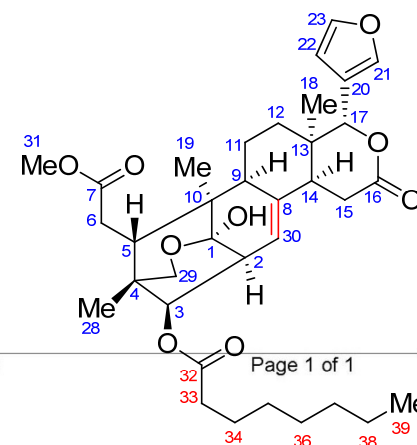

$^1\text{H}$  NMR (400 MHz) spectrum of **8i** in  $\text{CDCl}_3$

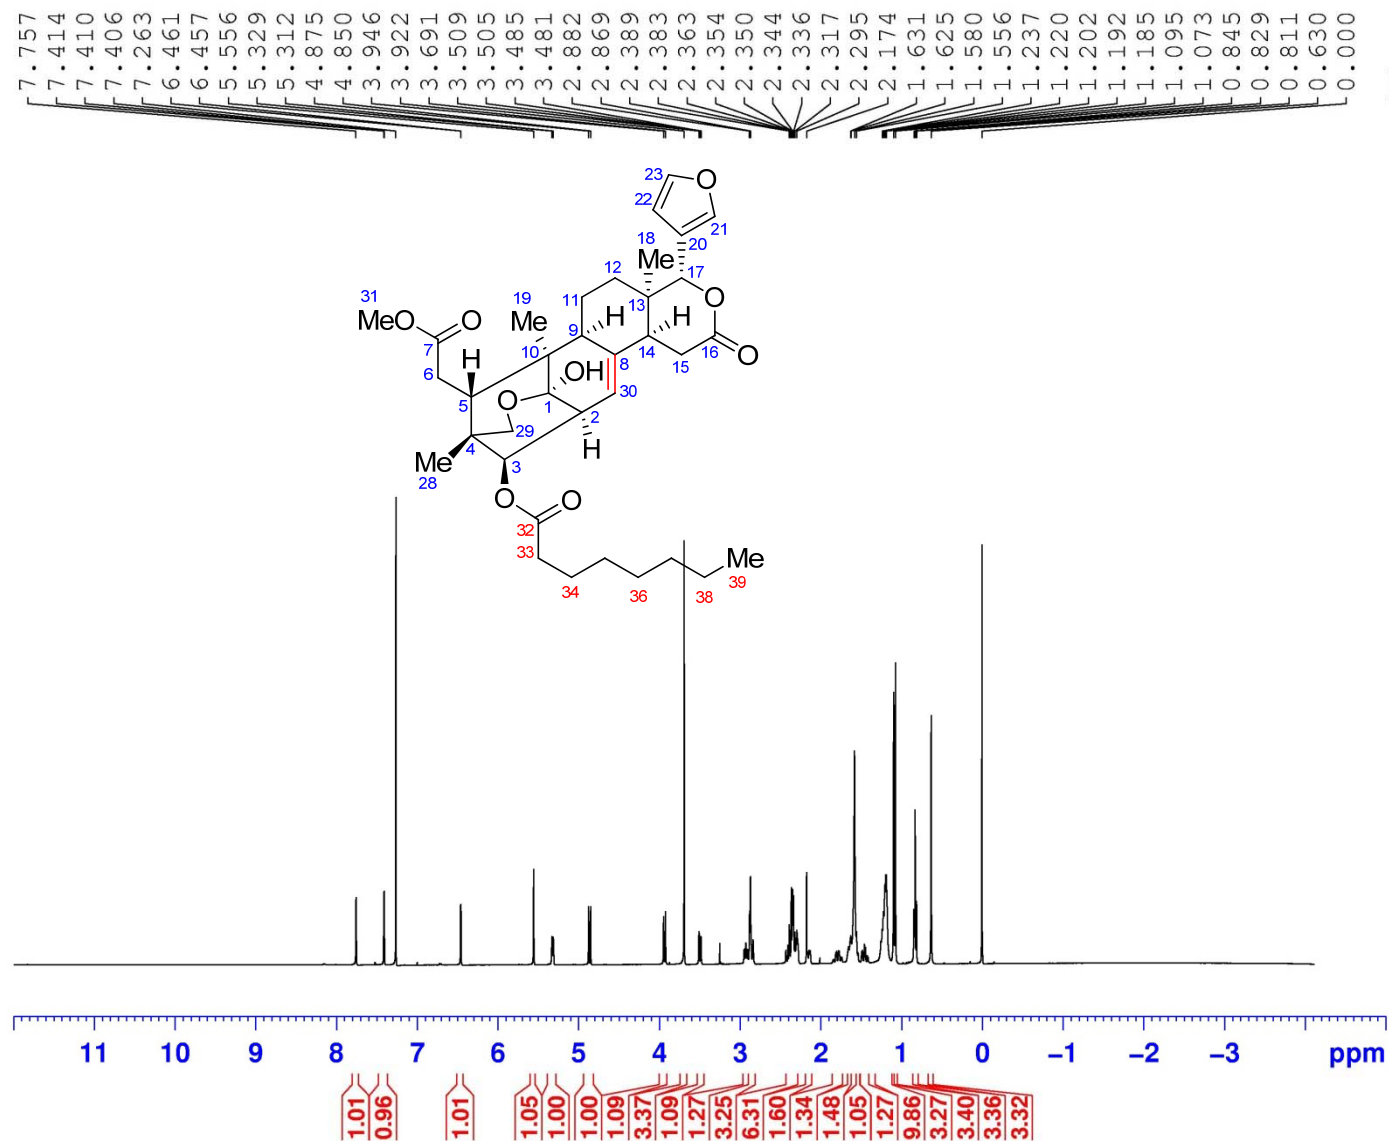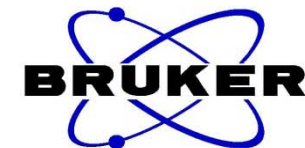

```

NAME      czc-1-CH3-XINSUAN
EXPNO     1
PROCNO    1
Date_     20171017
Time      15.47
INSTRUM   spect
PROBHD    5 mm CPPBBO BB
PULPROG   zg30
TD        65536
SOLVENT   CDCl3
NS         16
DS         2
SWH       8223.685 Hz
FIDRES    0.125483 Hz
AQ        3.9846387 sec
RG         208.5
DW        60.800 usec
DE        10.00 usec
TE        297.0 K
D1        1.00000000 sec
TD0        1

===== CHANNEL f1 =====
SF01      400.1324710 MHz
NUC1       1H
P1        11.50 usec
SI        65536
SF        400.1300085 MHz
WDW        EM
SSB        0
LB         0.30 Hz
GB         0
PC         1.00
    
```



$^1\text{H}$  NMR (400 MHz) spectrum of **8i** in  $\text{CDCl}_3$

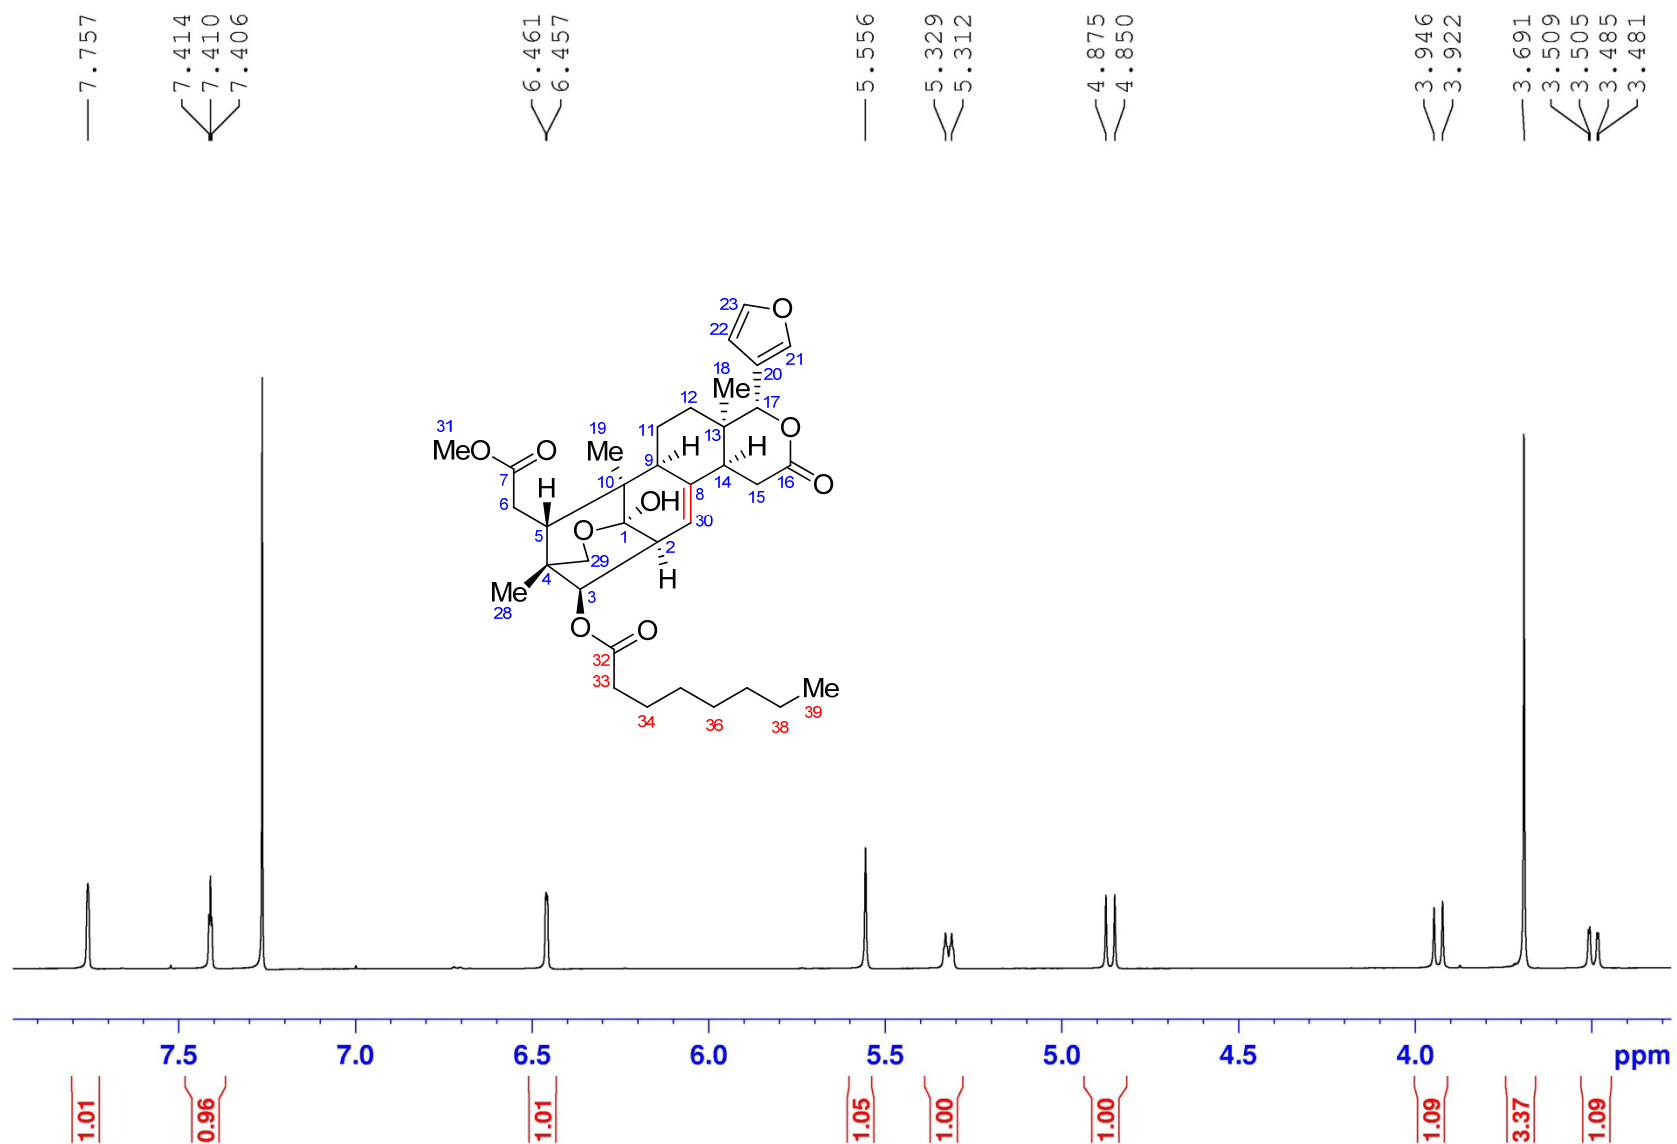

S139

$^1\text{H}$  NMR (400 MHz) spectrum of **8i** in  $\text{CDCl}_3$

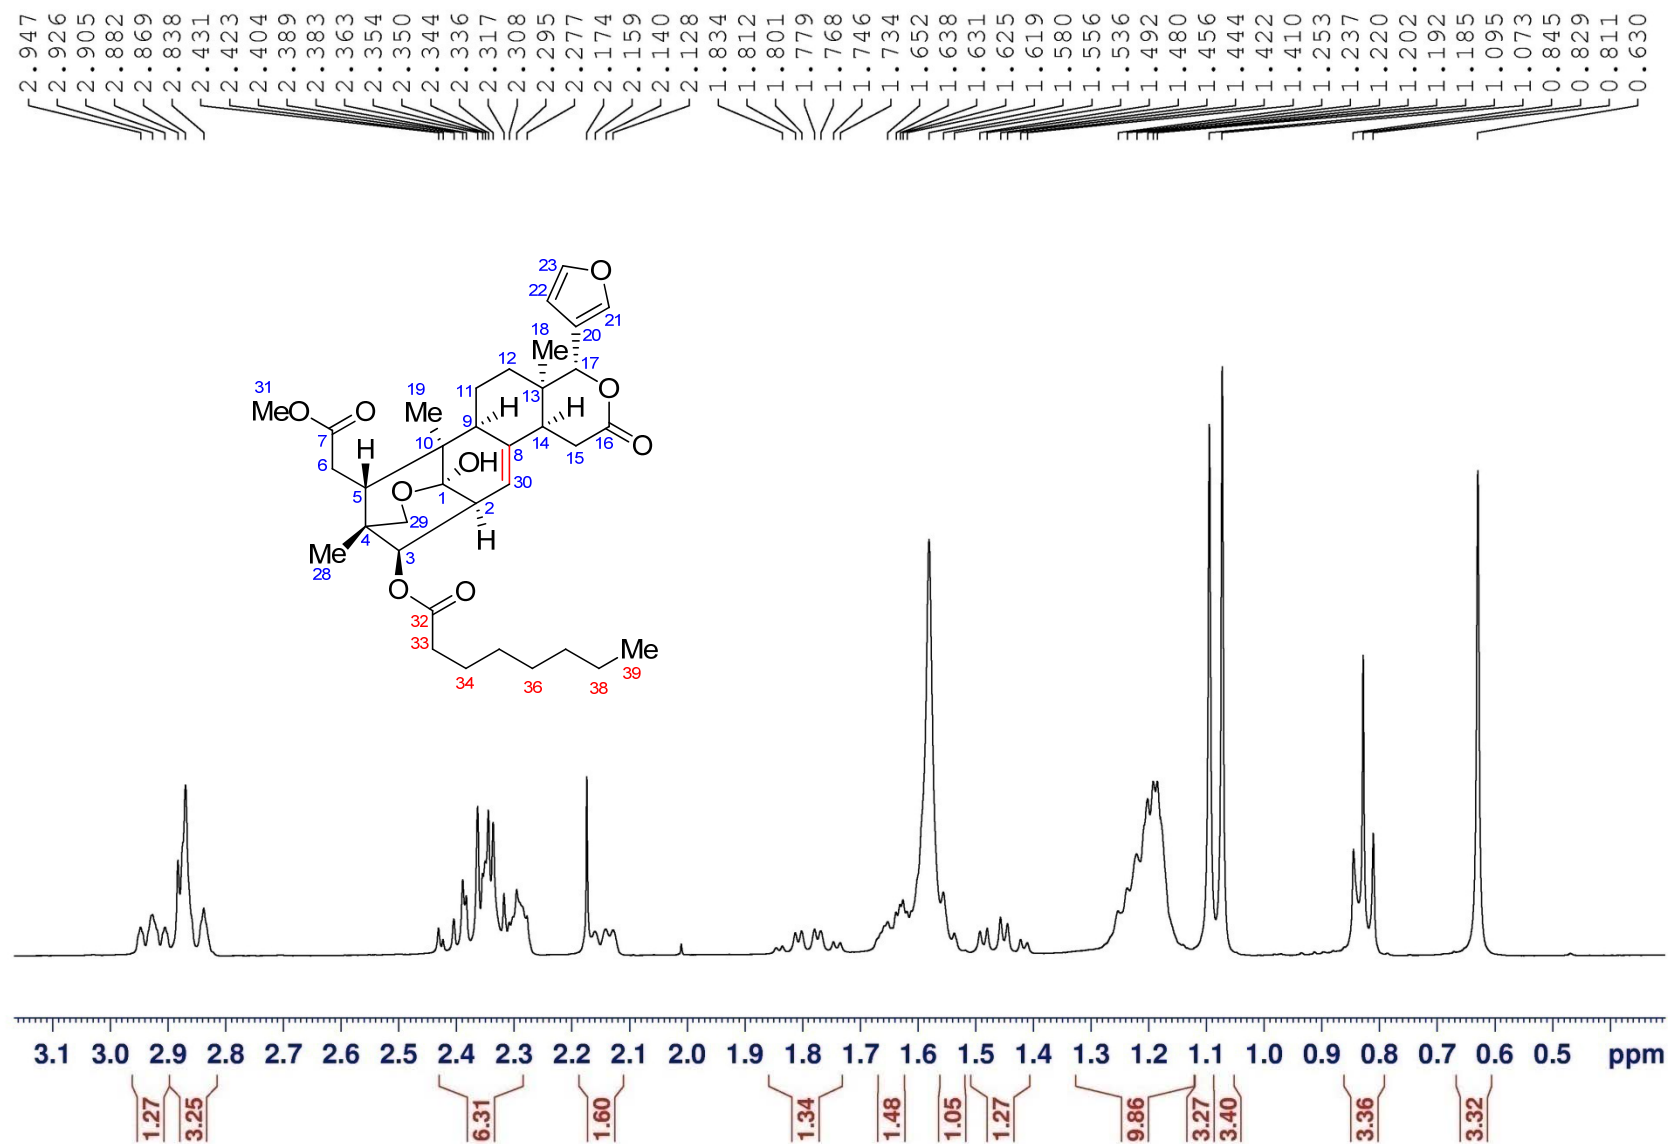

$^{13}\text{C}$  NMR (100 MHz) spectrum of **8i** in  $\text{CDCl}_3$

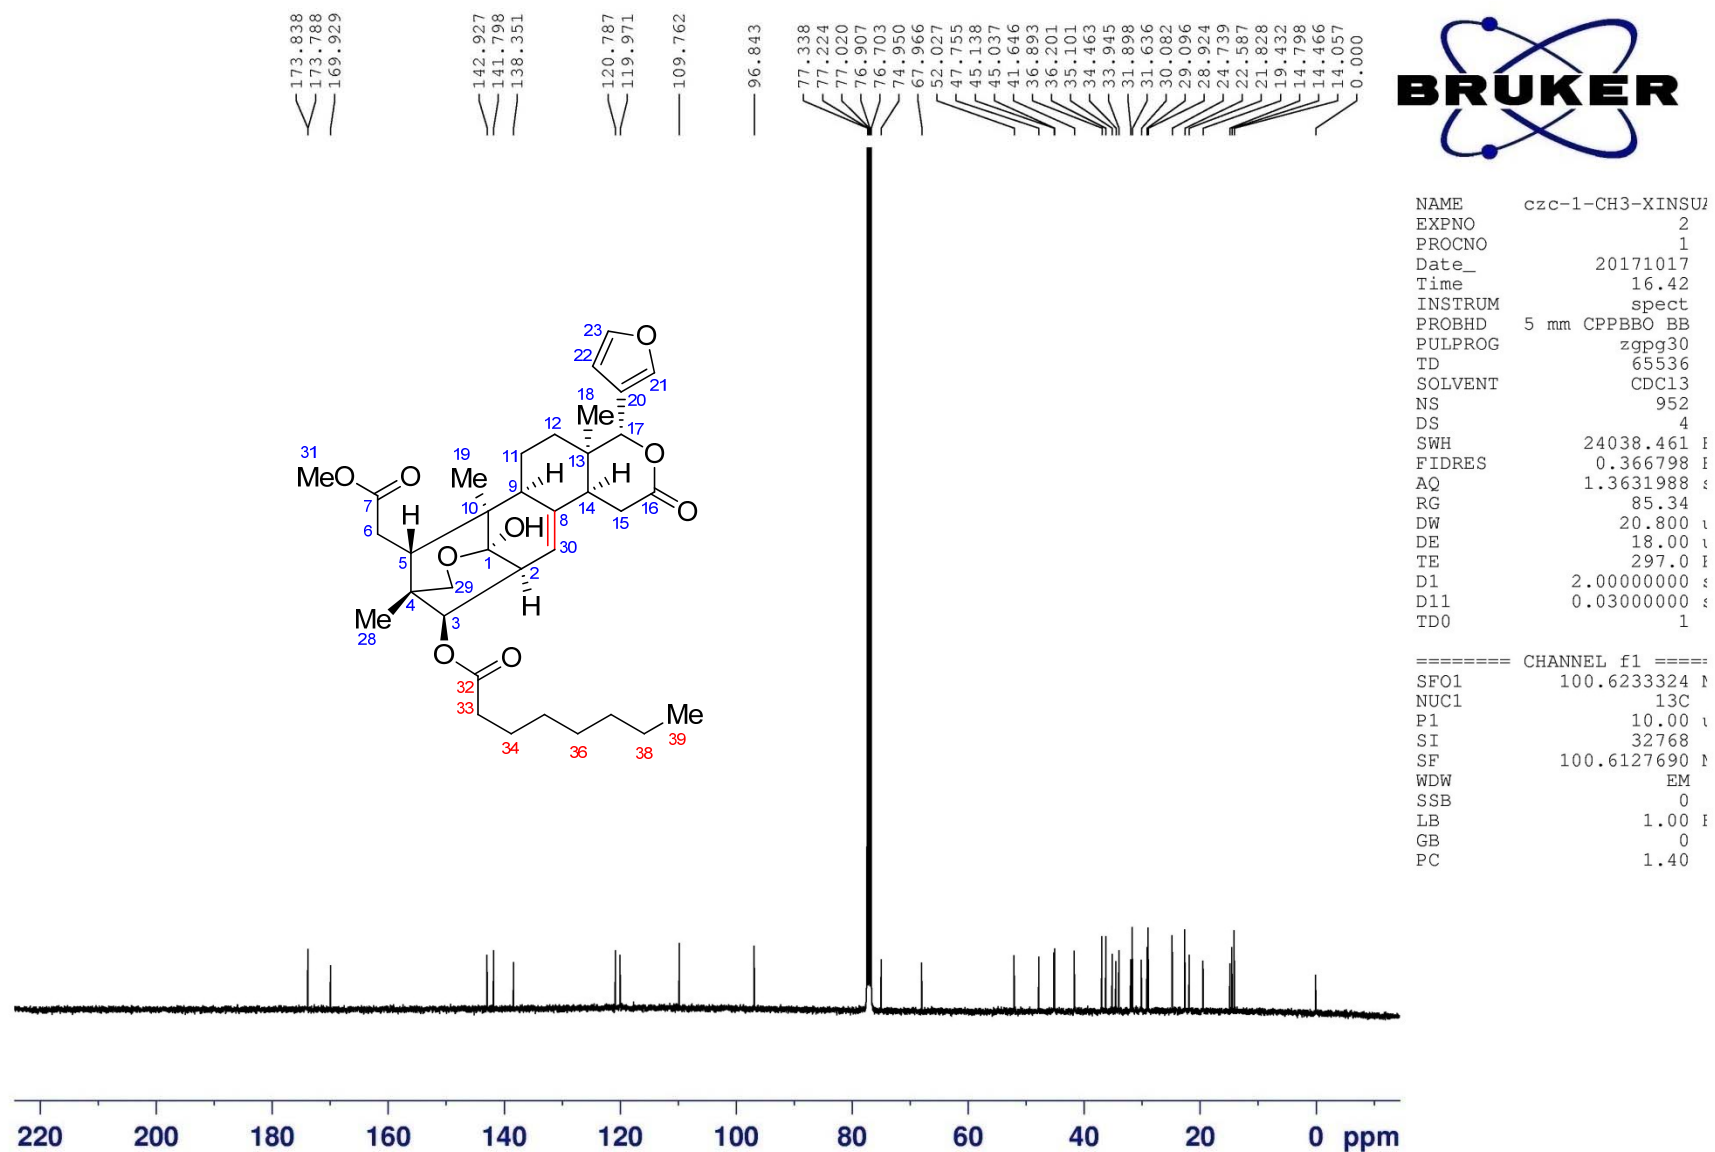

$^{13}\text{C}$  NMR (100 MHz) spectrum of **8i** in  $\text{CDCl}_3$

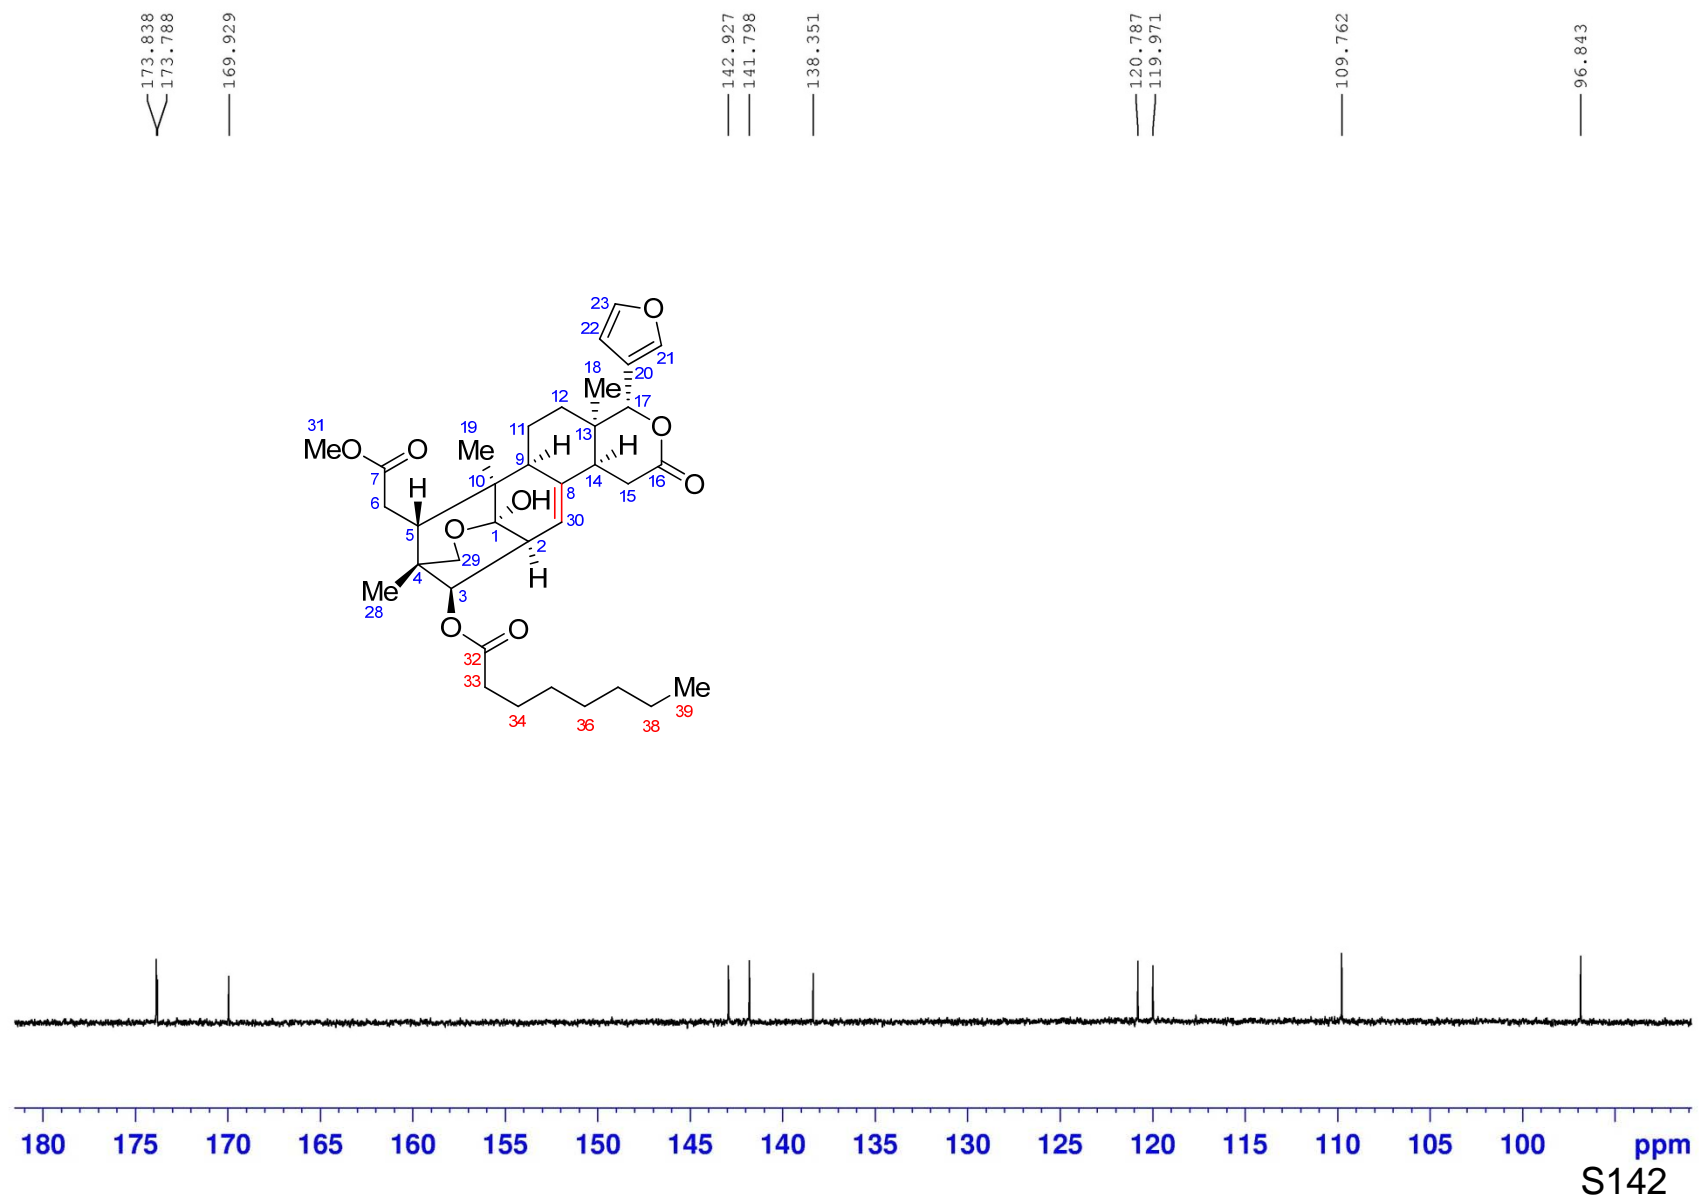

$^{13}\text{C}$  NMR (100 MHz) spectrum of **8i** in  $\text{CDCl}_3$

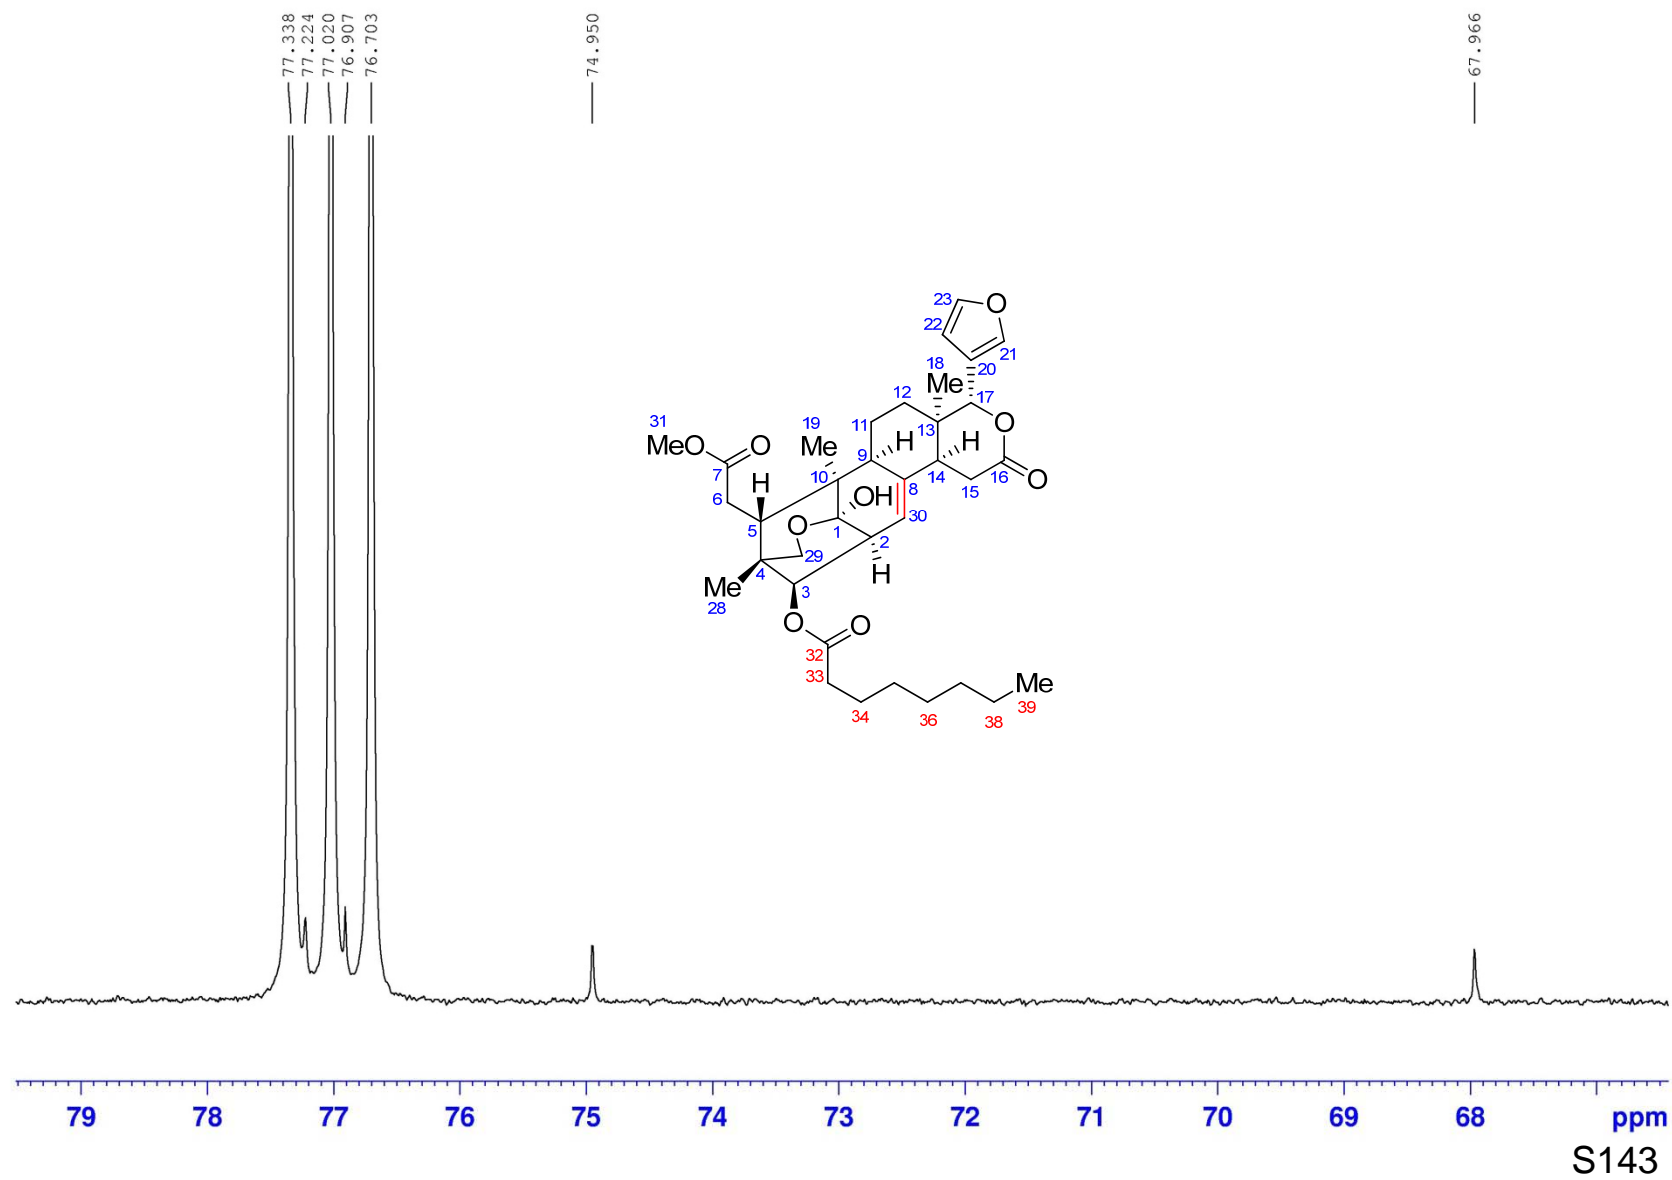

$^{13}\text{C}$  NMR (100 MHz) spectrum of **8i** in  $\text{CDCl}_3$

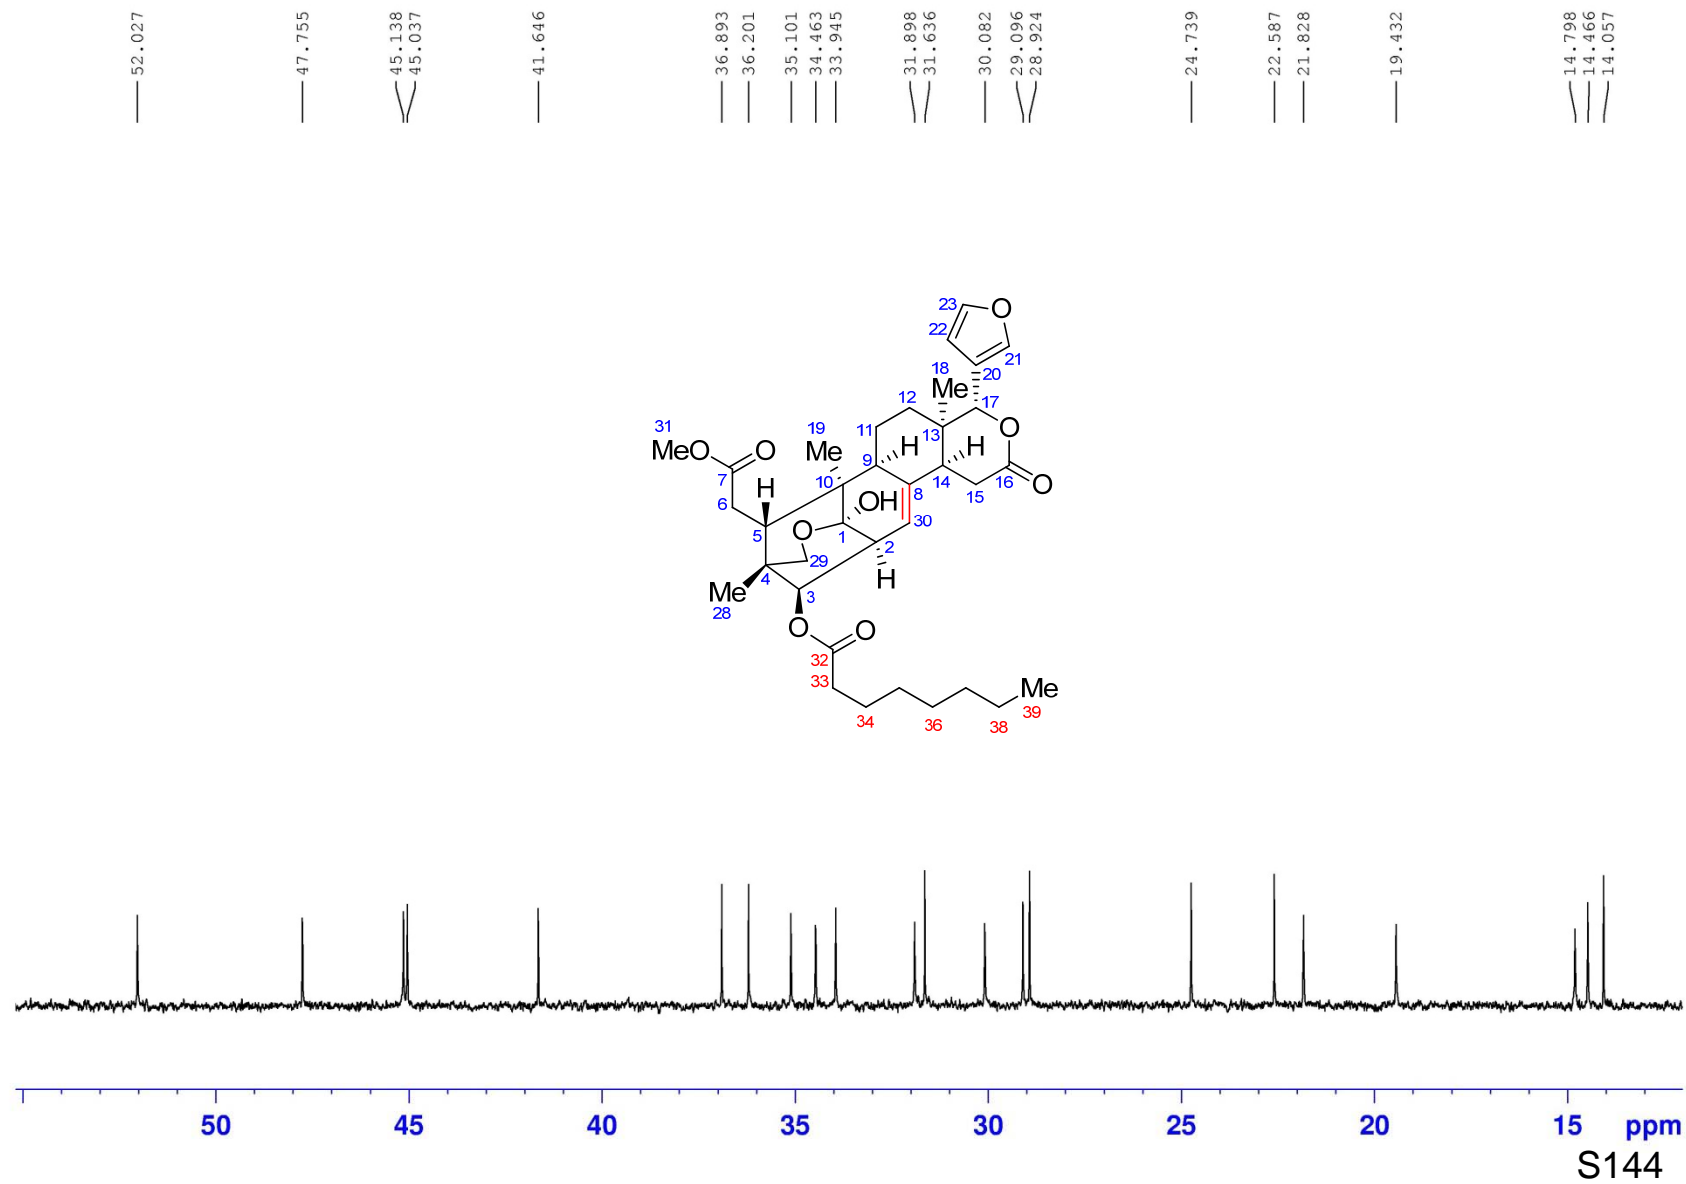

# DEPT 135 spectrum of **8i** in CDCl<sub>3</sub>

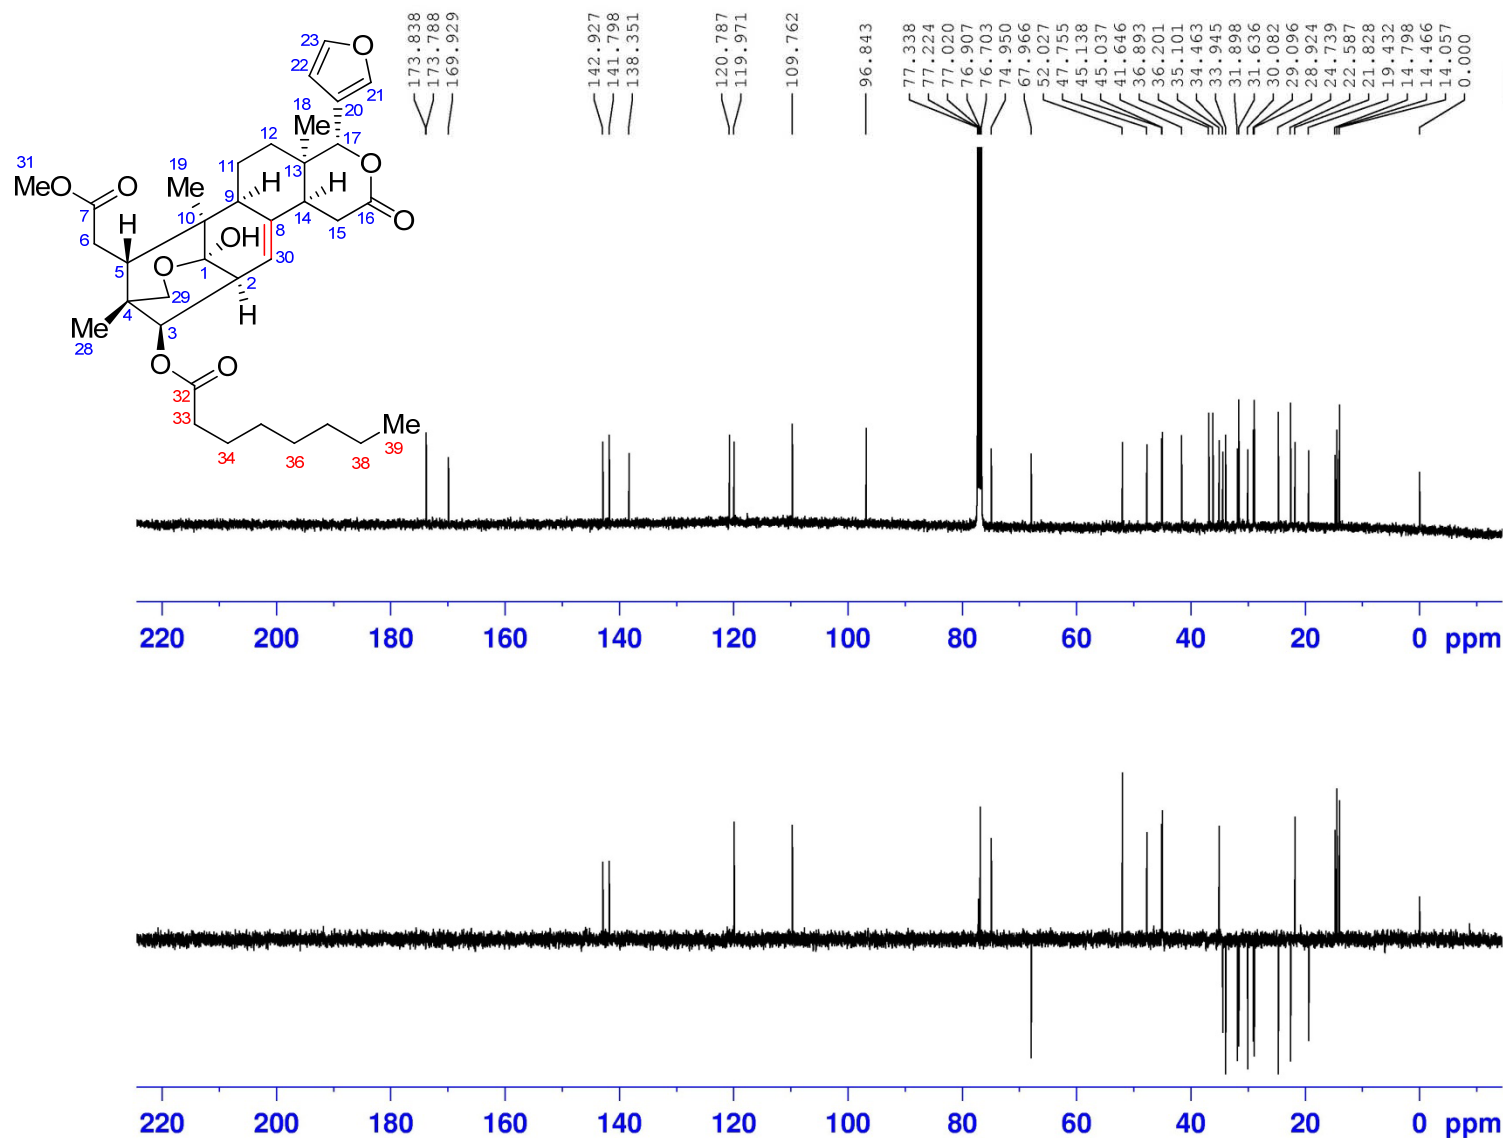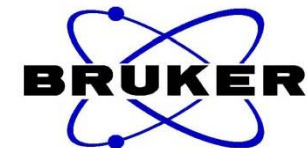

```

NAME      czc-1-CH3-XINSU
EXPNO      3
PROCNO     1
Date_      20171017
Time       16.44
INSTRUM    spect
PROBHD     5 mm CPPBBO BB
PULPROG    deptsp135
TD         65536
SOLVENT    CDCl3
NS         300
DS         4
SWH         24038.461
FIDRES     0.366798
AQ         1.3631988
RG         85.34
DW         20.800
DE         18.00
TE         297.0
CNST2      145.0000000
D1         2.00000000
D2         0.00344828
D12        0.00002000
TD0        1
    
```

```

===== CHANNEL f1 =====
SF01      100.6233324
NUC1       13C
P1         10.00
P13        2000.00
SI         32768
SF         100.6127690
WDW        EM
SSB        0
LB         1.00
GB         0
PC         1.40
    
```

# DEPT 135 spectrum of **8i** in CDCl<sub>3</sub>

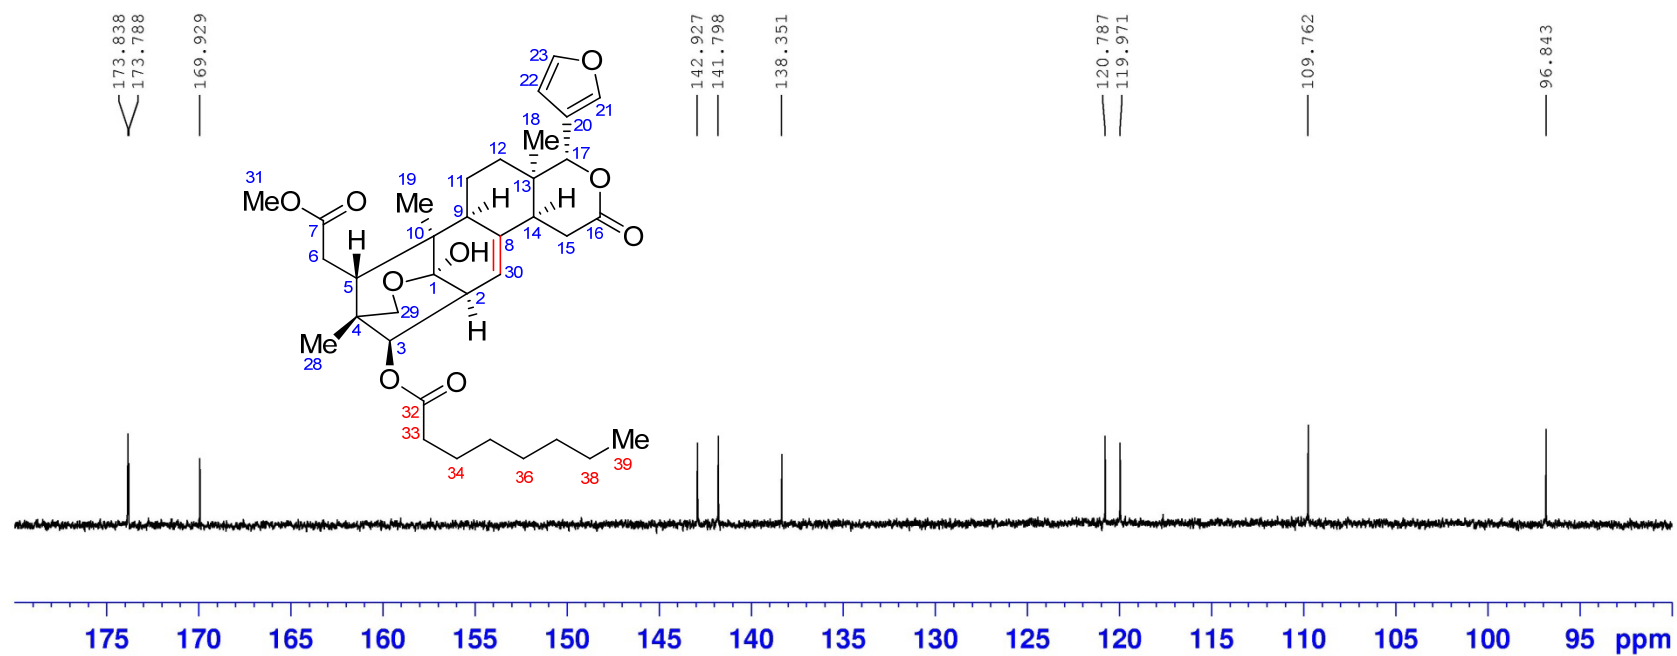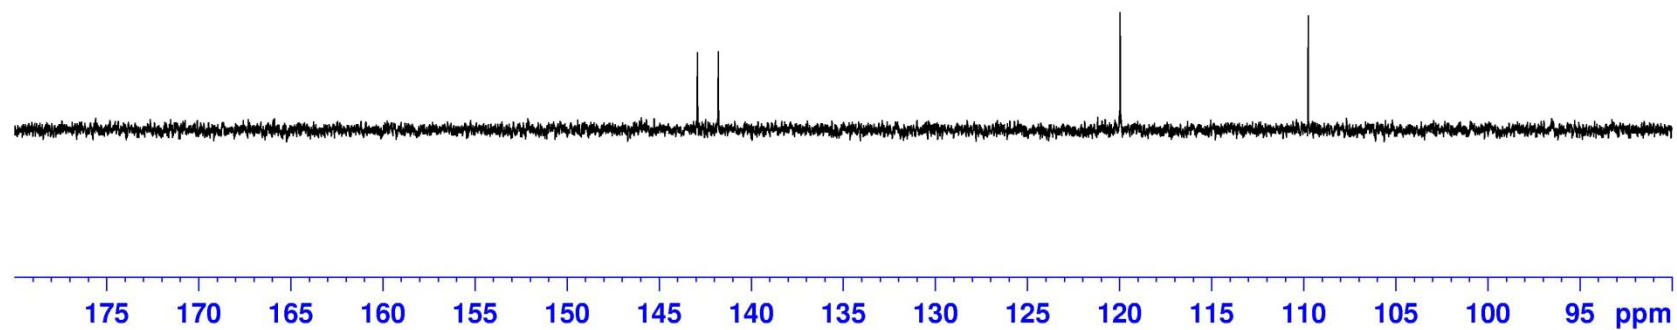



DEPT 135 spectrum of **8i** in CDCl<sub>3</sub>

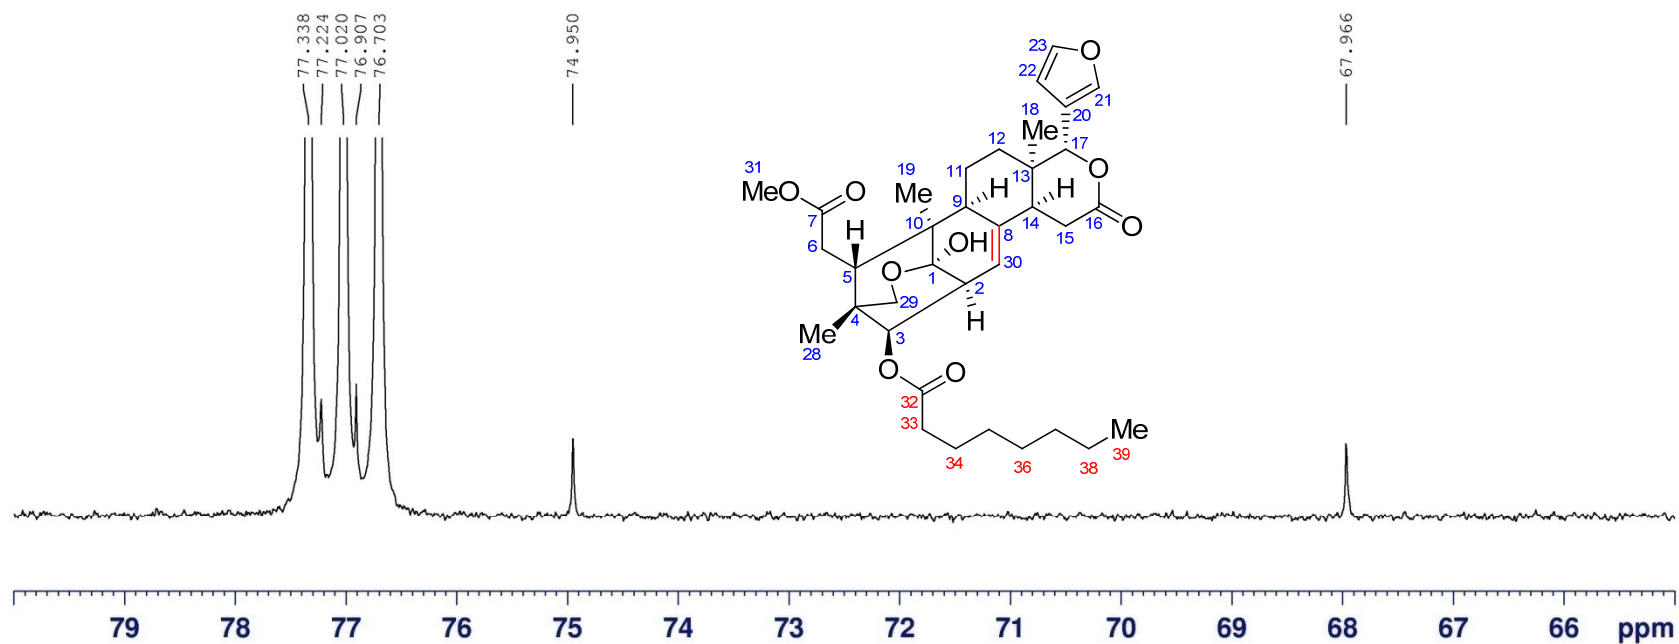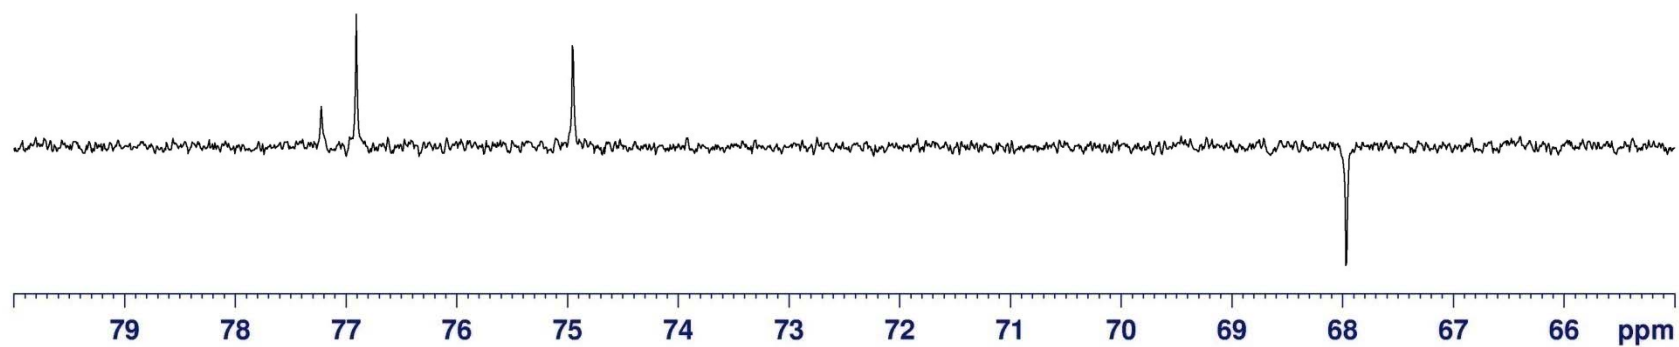

# DEPT 135 spectrum of **8i** in CDCl<sub>3</sub>

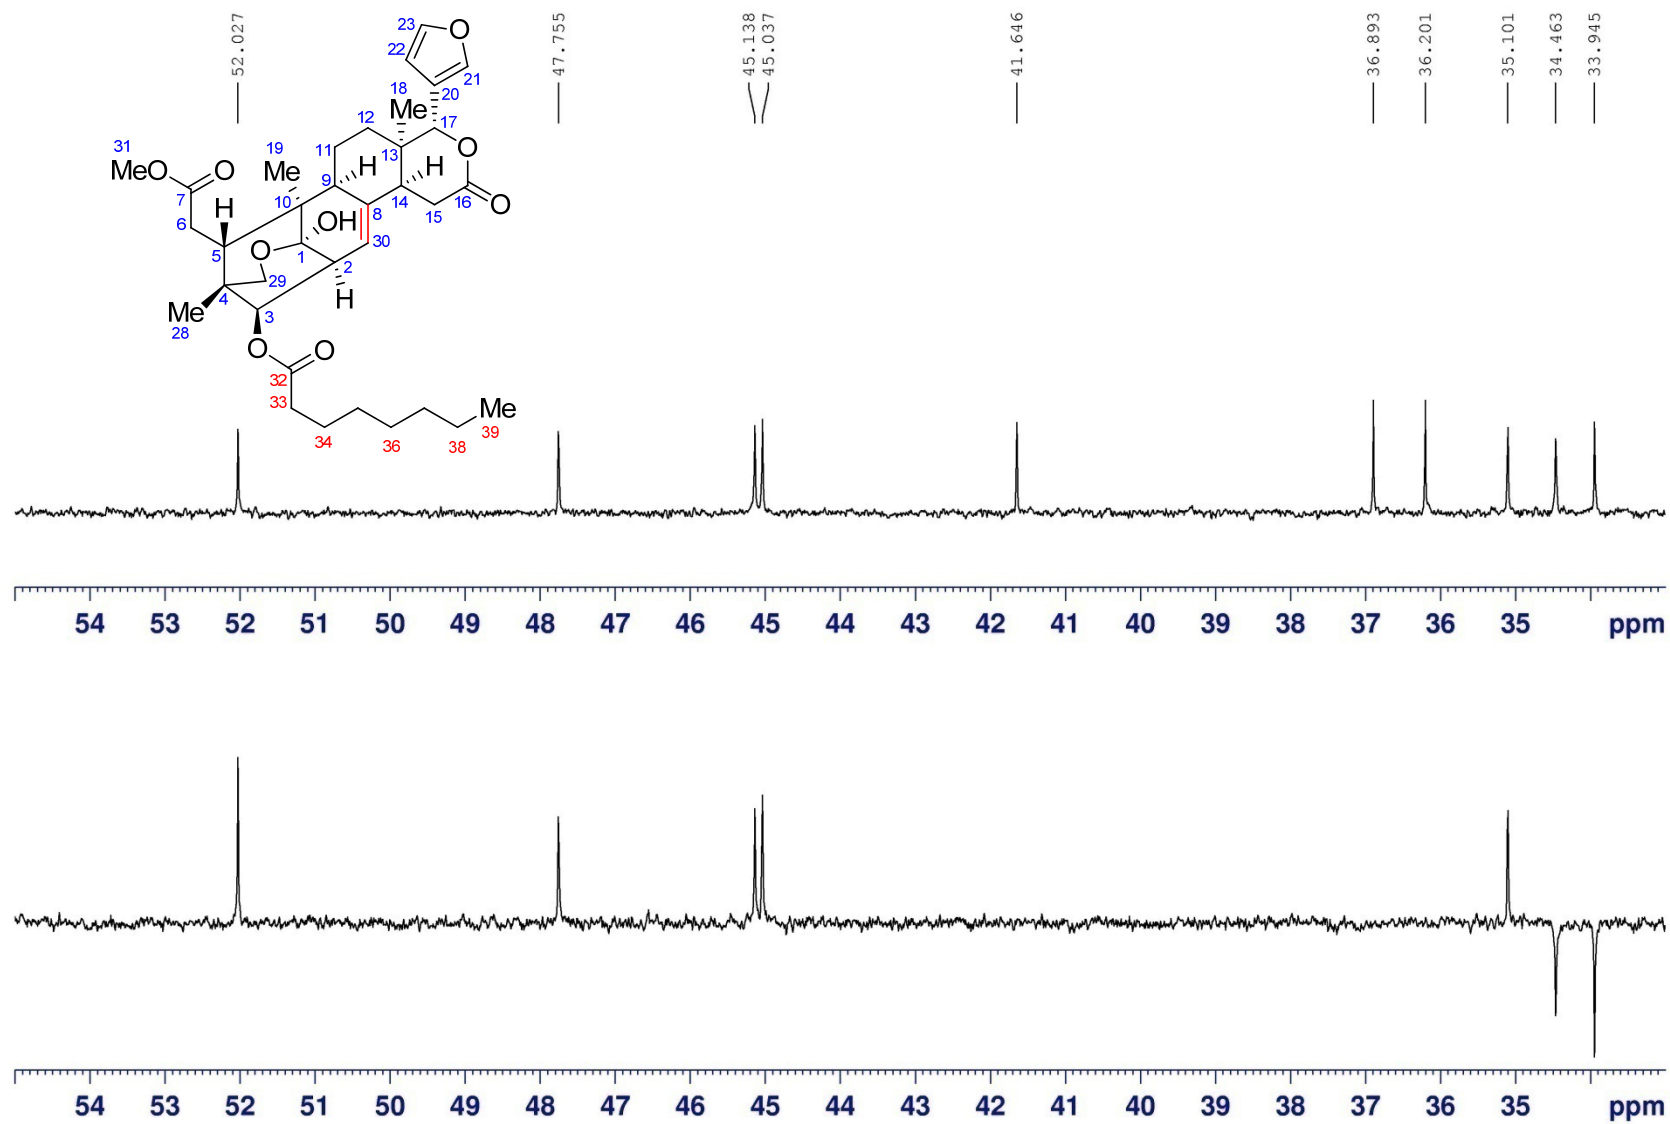

# DEPT 135 spectrum of **8i** in CDCl<sub>3</sub>

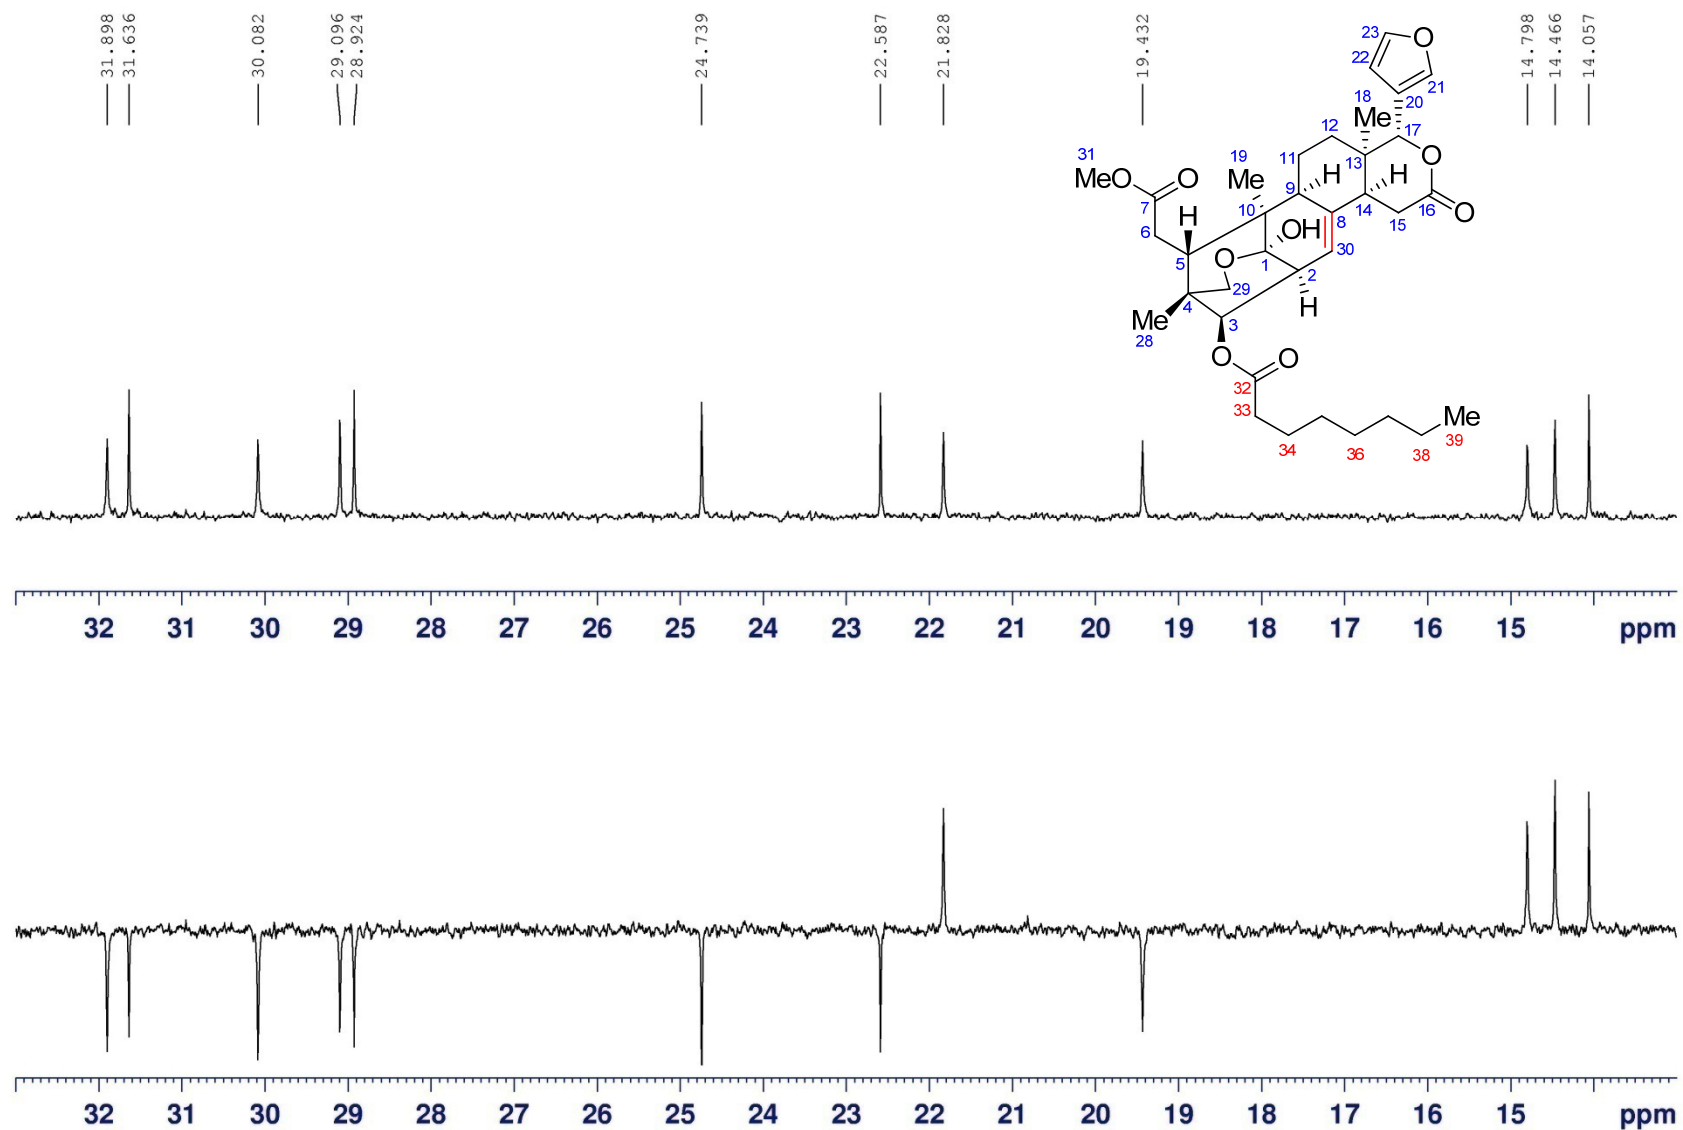

## LR-ESIMS for compound **9**

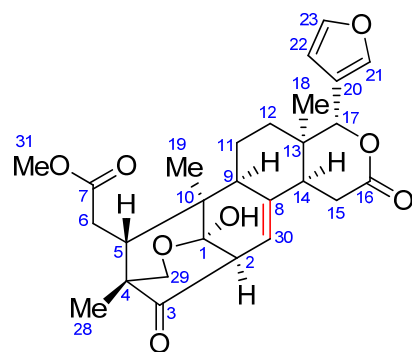

### Generic Display Report

|                                               |                                             |                                  |           |
|-----------------------------------------------|---------------------------------------------|----------------------------------|-----------|
| Analysis Info                                 |                                             | Acquisition D 2018/9/21 11:55:41 |           |
| Analysis Name D:\MS\RJL\9.30\64_RA1_01_1513.d |                                             |                                  |           |
| Method                                        | lc-7.9                                      | Operator                         | bruker    |
| Sample Name                                   | 80140922-alternating-500-50-2200-MS2_1513.m | Instrument                       | amaZon SL |
| Comment                                       |                                             |                                  |           |

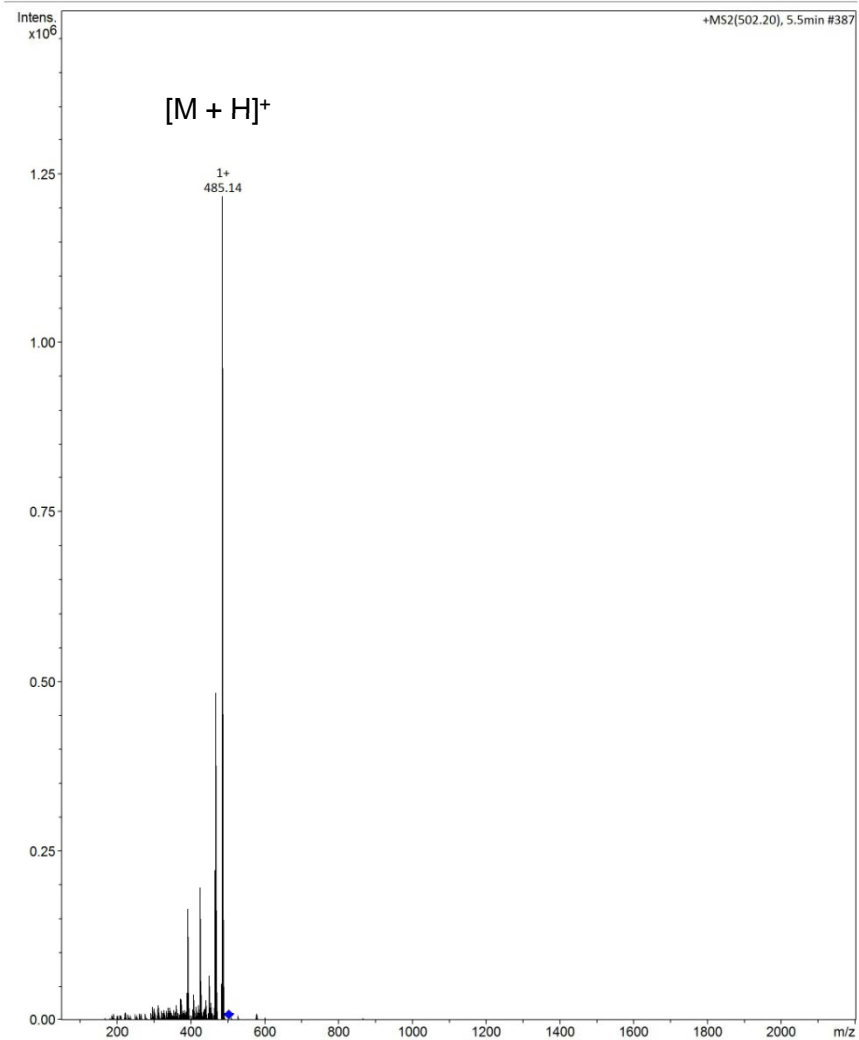

Bruker Compass DataAnalysis

S150

$^1\text{H}$  NMR (400 MHz) spectrum of **9** in  $\text{CDCl}_3$

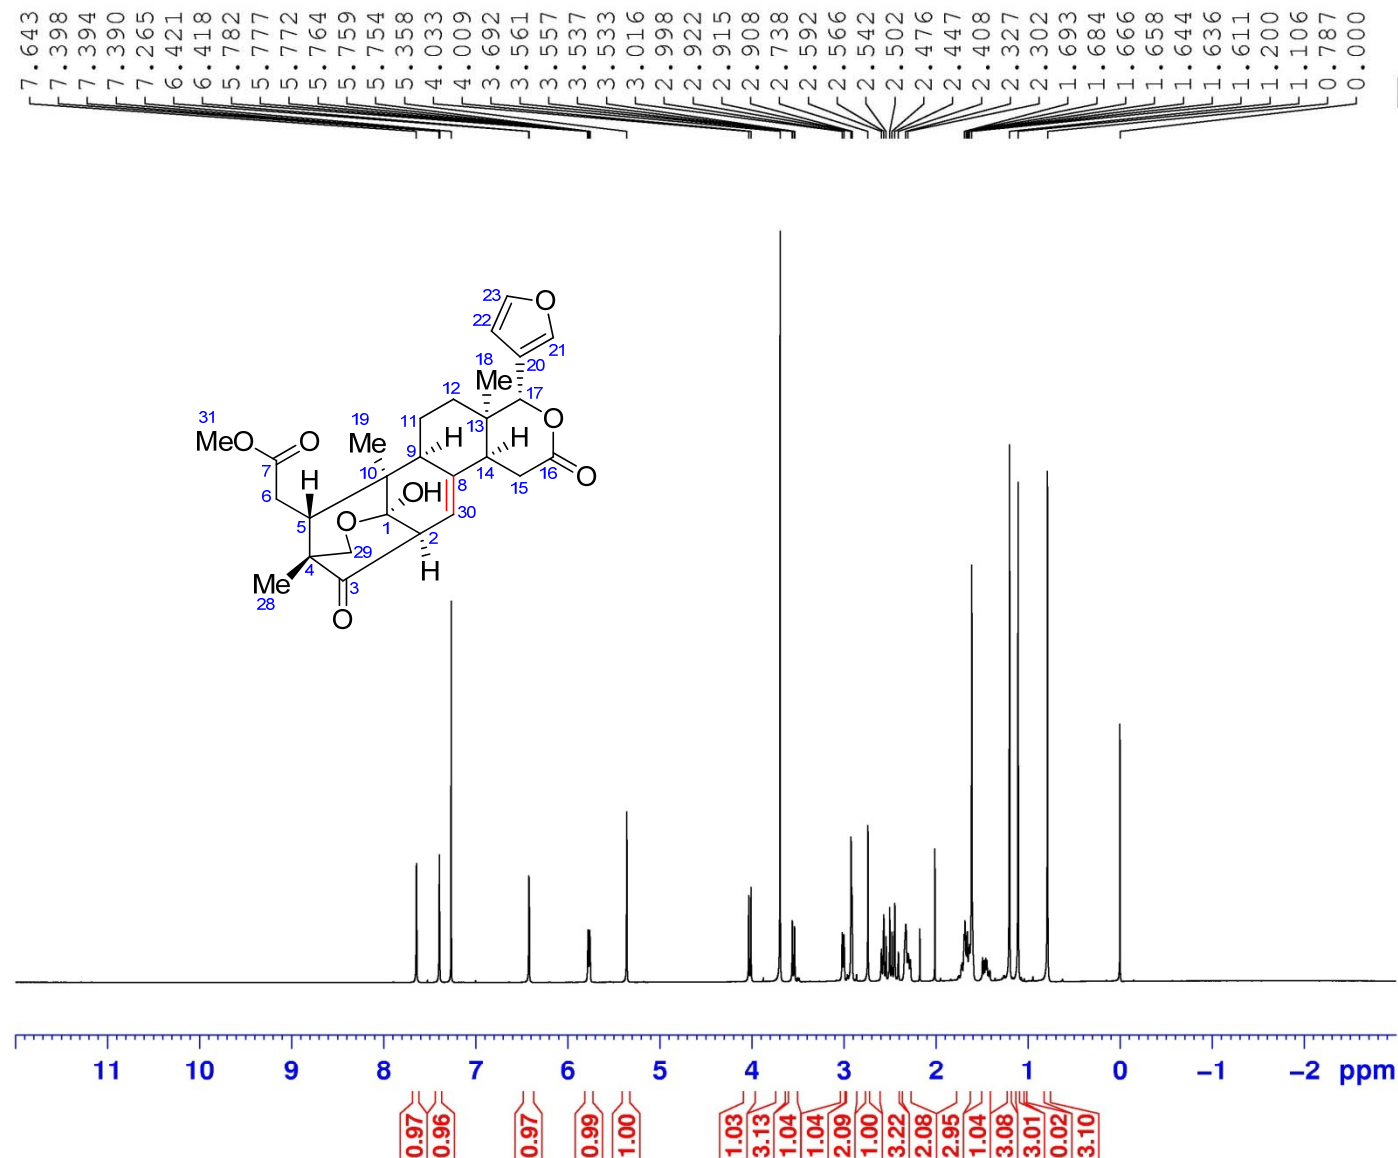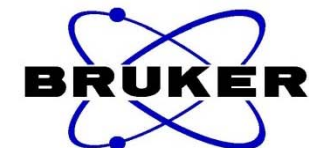

```

NAME      czc-1-ibx-CH3
EXPNO     1
PROCNO    1
Date_     20170919
Time      14.57
INSTRUM   spect
PROBHD    5 mm CPPBBO BB
PULPROG   zg30
TD        65536
SOLVENT   CDCl3
NS        16
DS        2
SWH       8223.685 Hz
FIDRES    0.125483 Hz
AQ        3.9846387 sec
RG        208.5
DW        60.800 usec
DE        10.00 usec
TE        297.0 K
D1        1.00000000 sec
TD0       1

===== CHANNEL f1 =====
SFO1     400.1324710 MHz
NUC1     1H
P1       11.50 usec
SI       65536
SF       400.1300076 MHz
WDW      EM
SSB      0
LB       0.30 Hz
GB       0
PC       1.00
    
```

$^1\text{H}$  NMR (400 MHz) spectrum of **9** in  $\text{CDCl}_3$

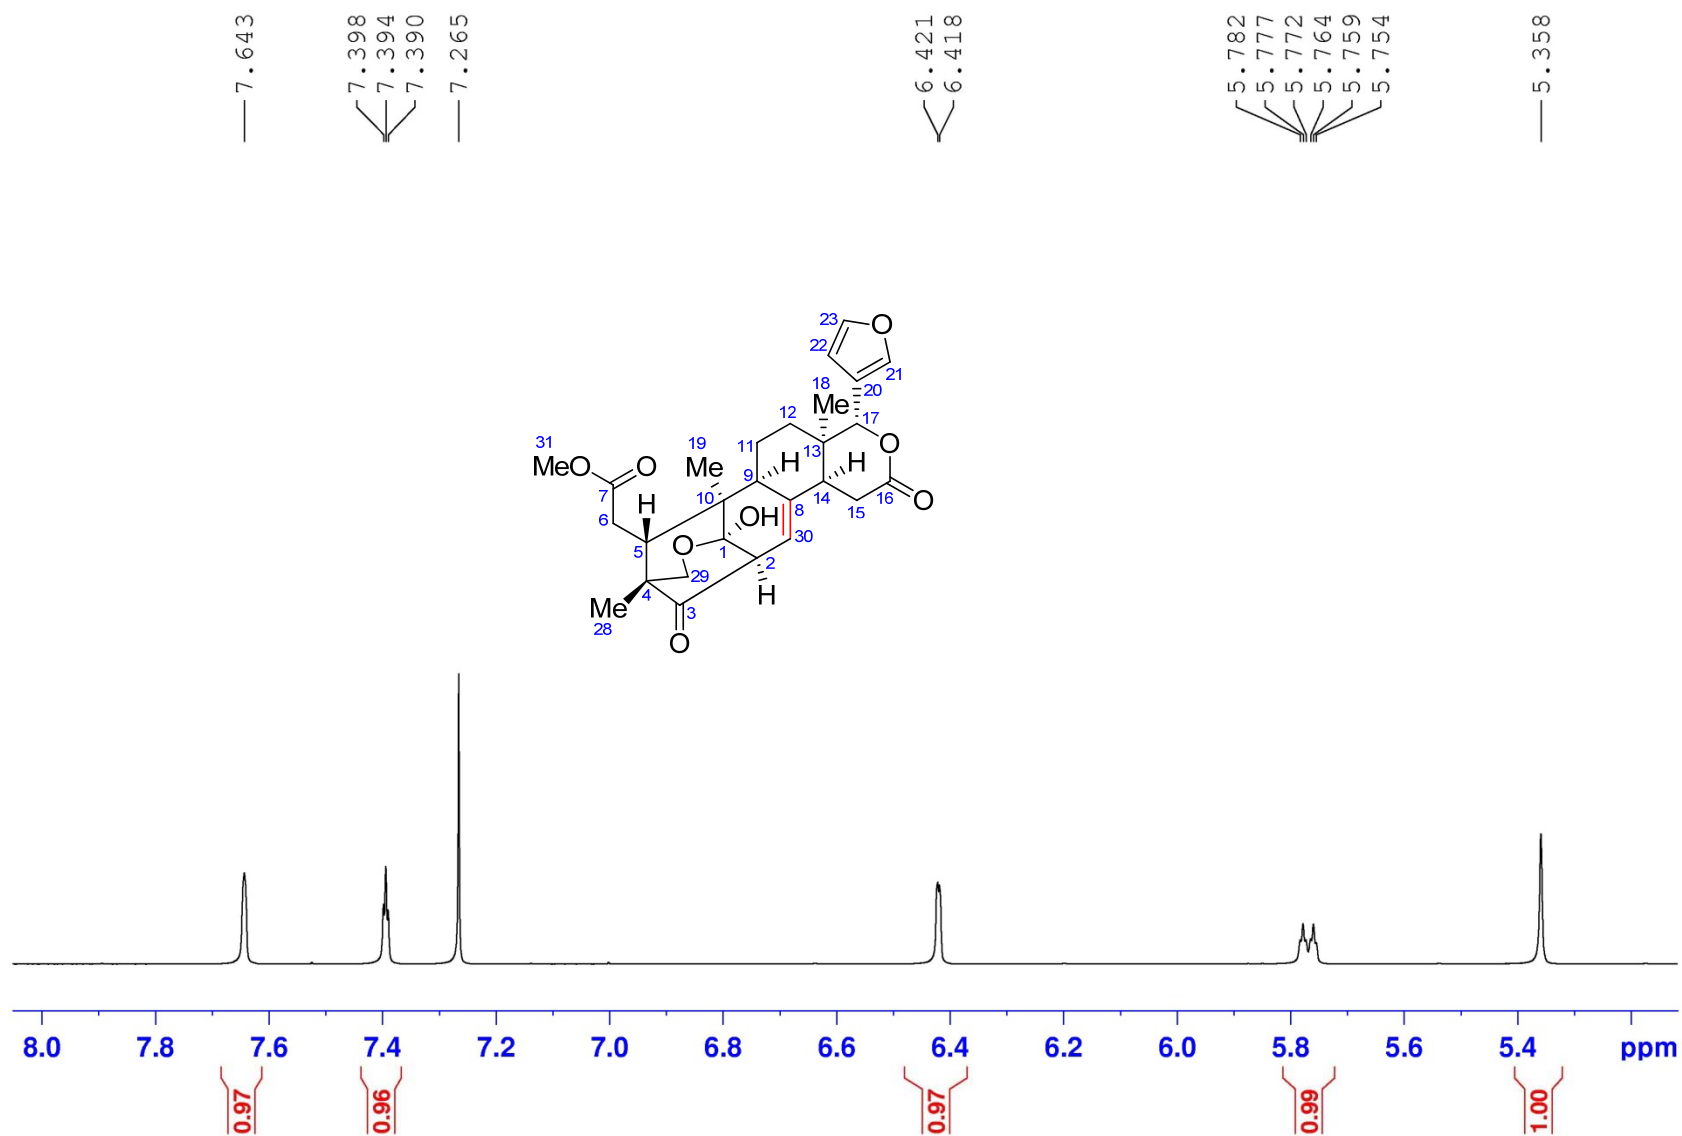

S152

$^1\text{H}$  NMR (400 MHz) spectrum of **9** in  $\text{CDCl}_3$

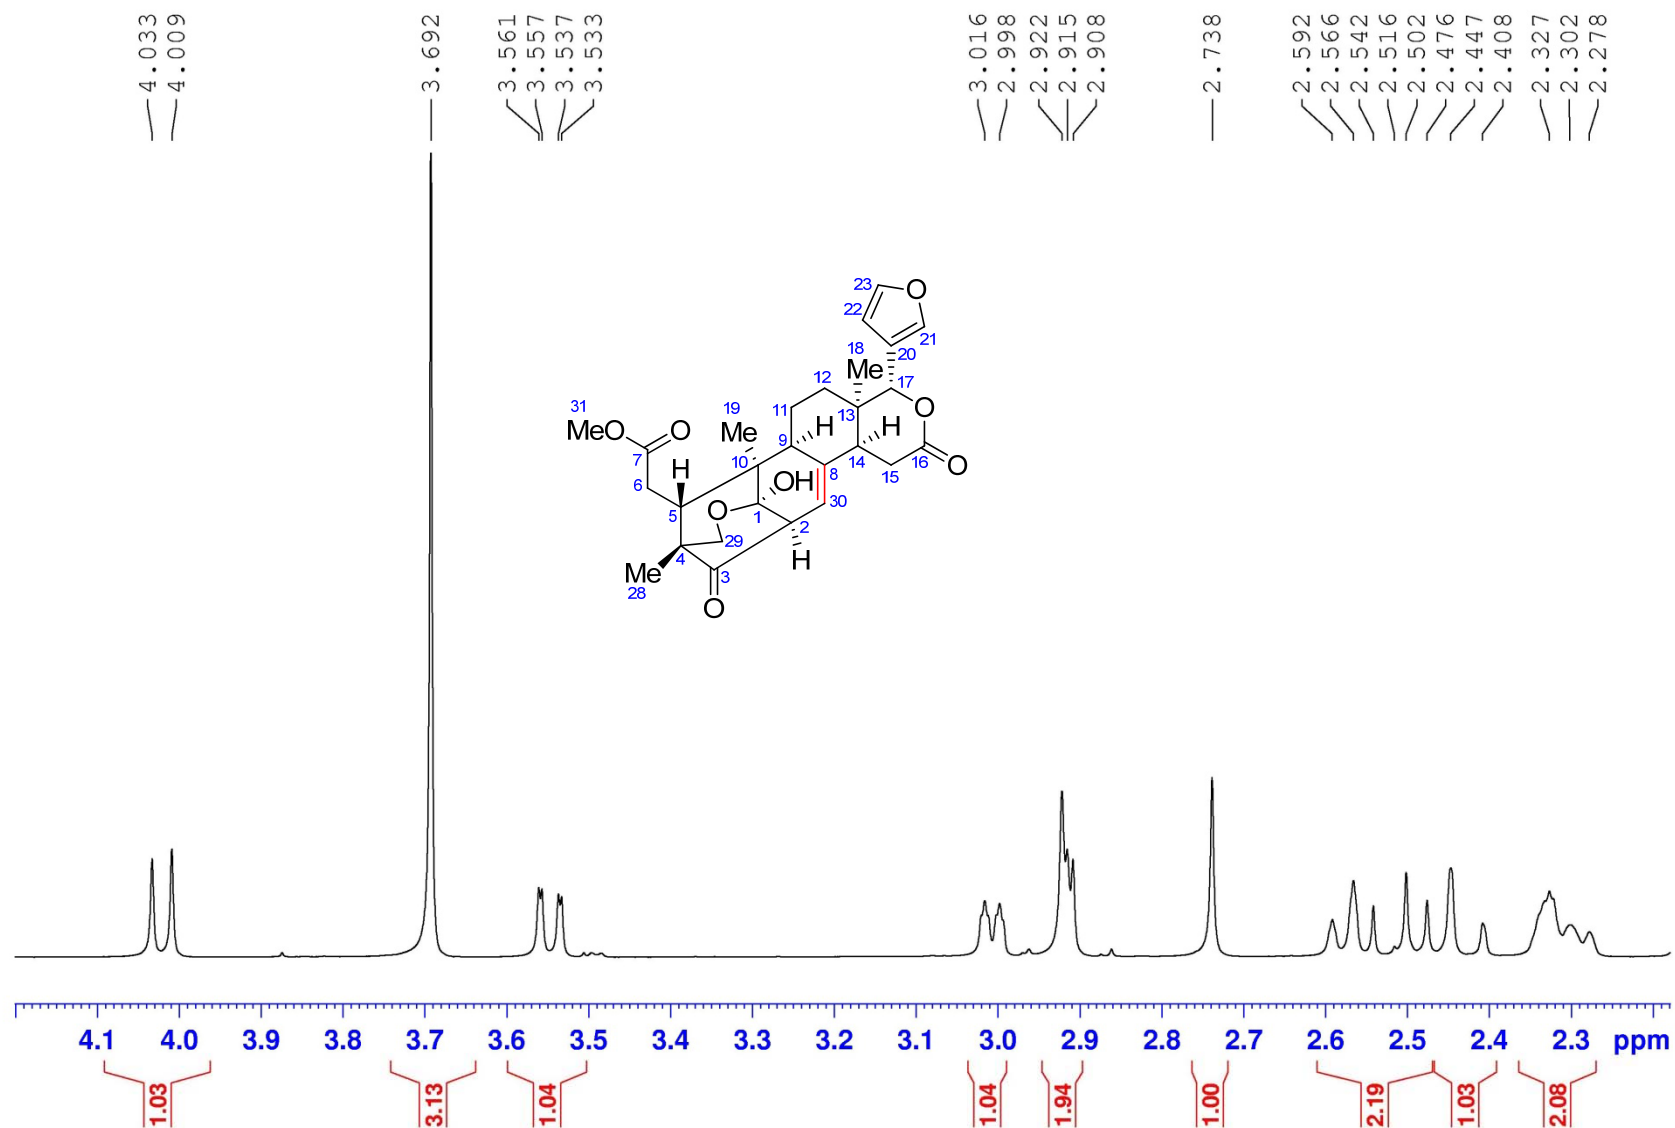

S153

$^1\text{H}$  NMR (400 MHz) spectrum of **9** in  $\text{CDCl}_3$

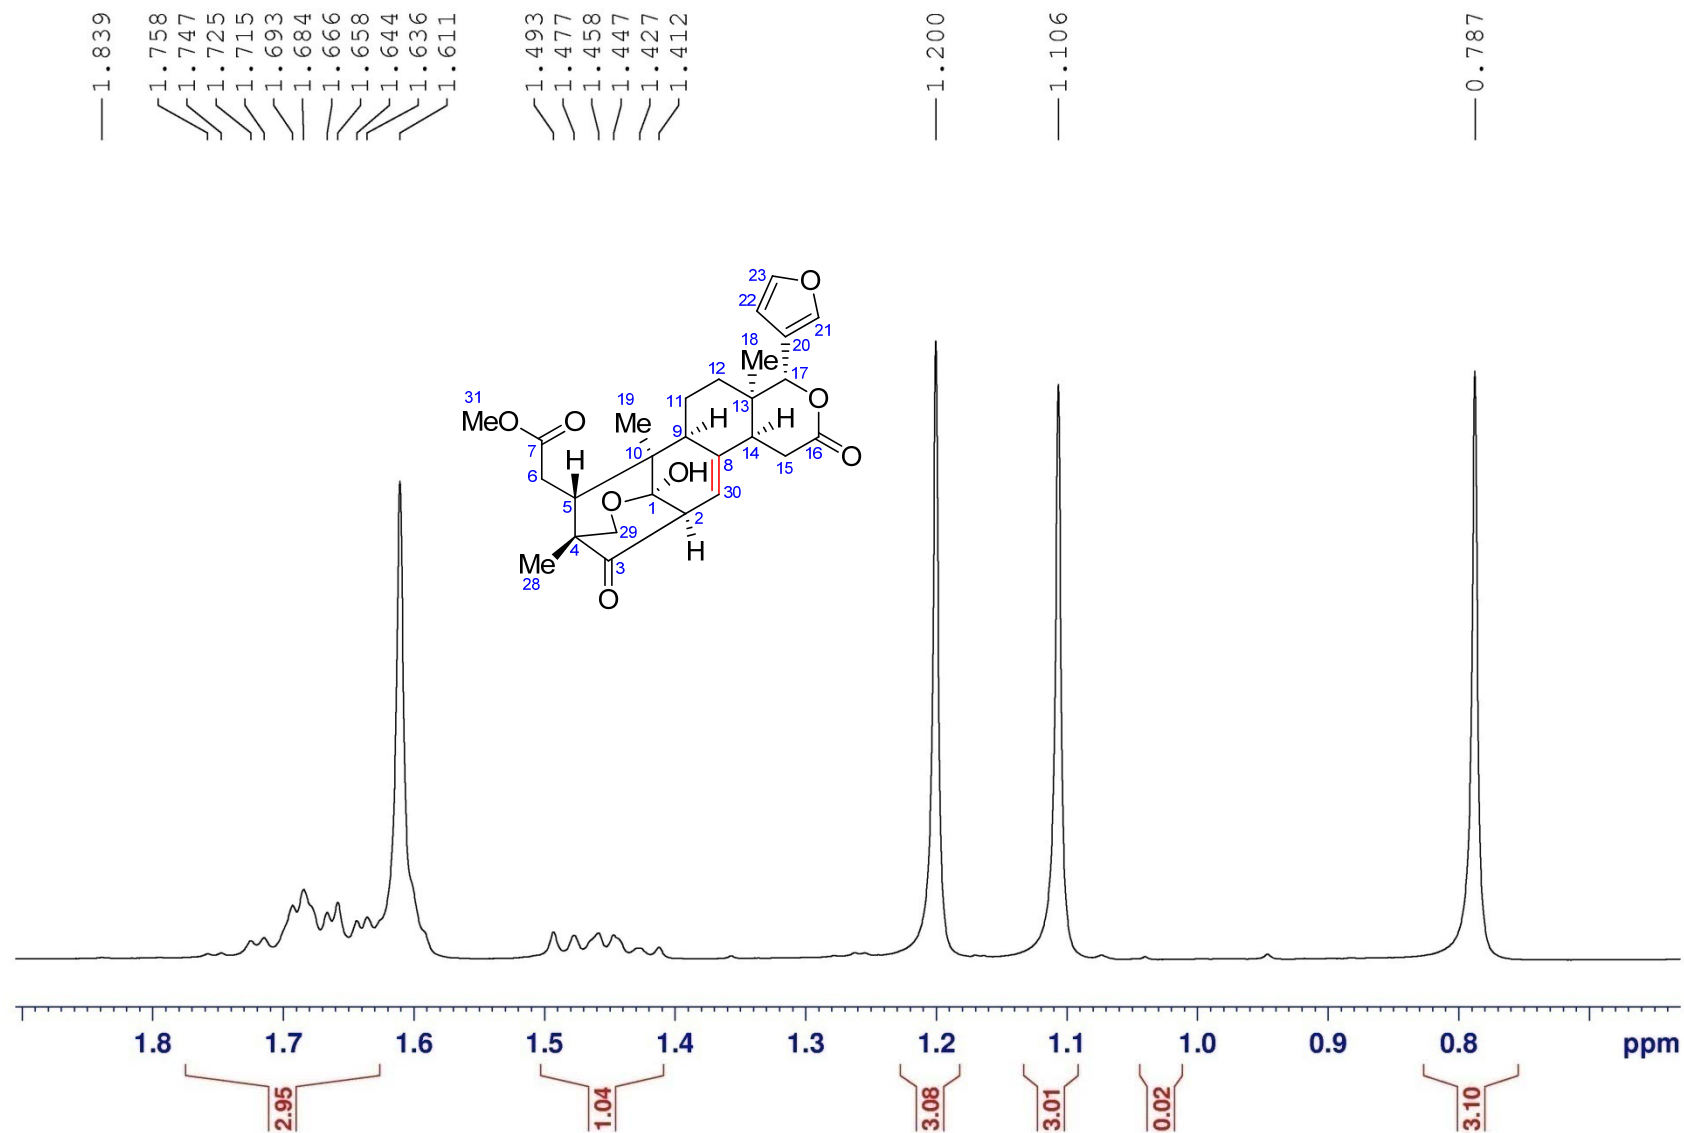



$^{13}\text{C}$  NMR (100 MHz) spectrum of **9** in  $\text{CDCl}_3$

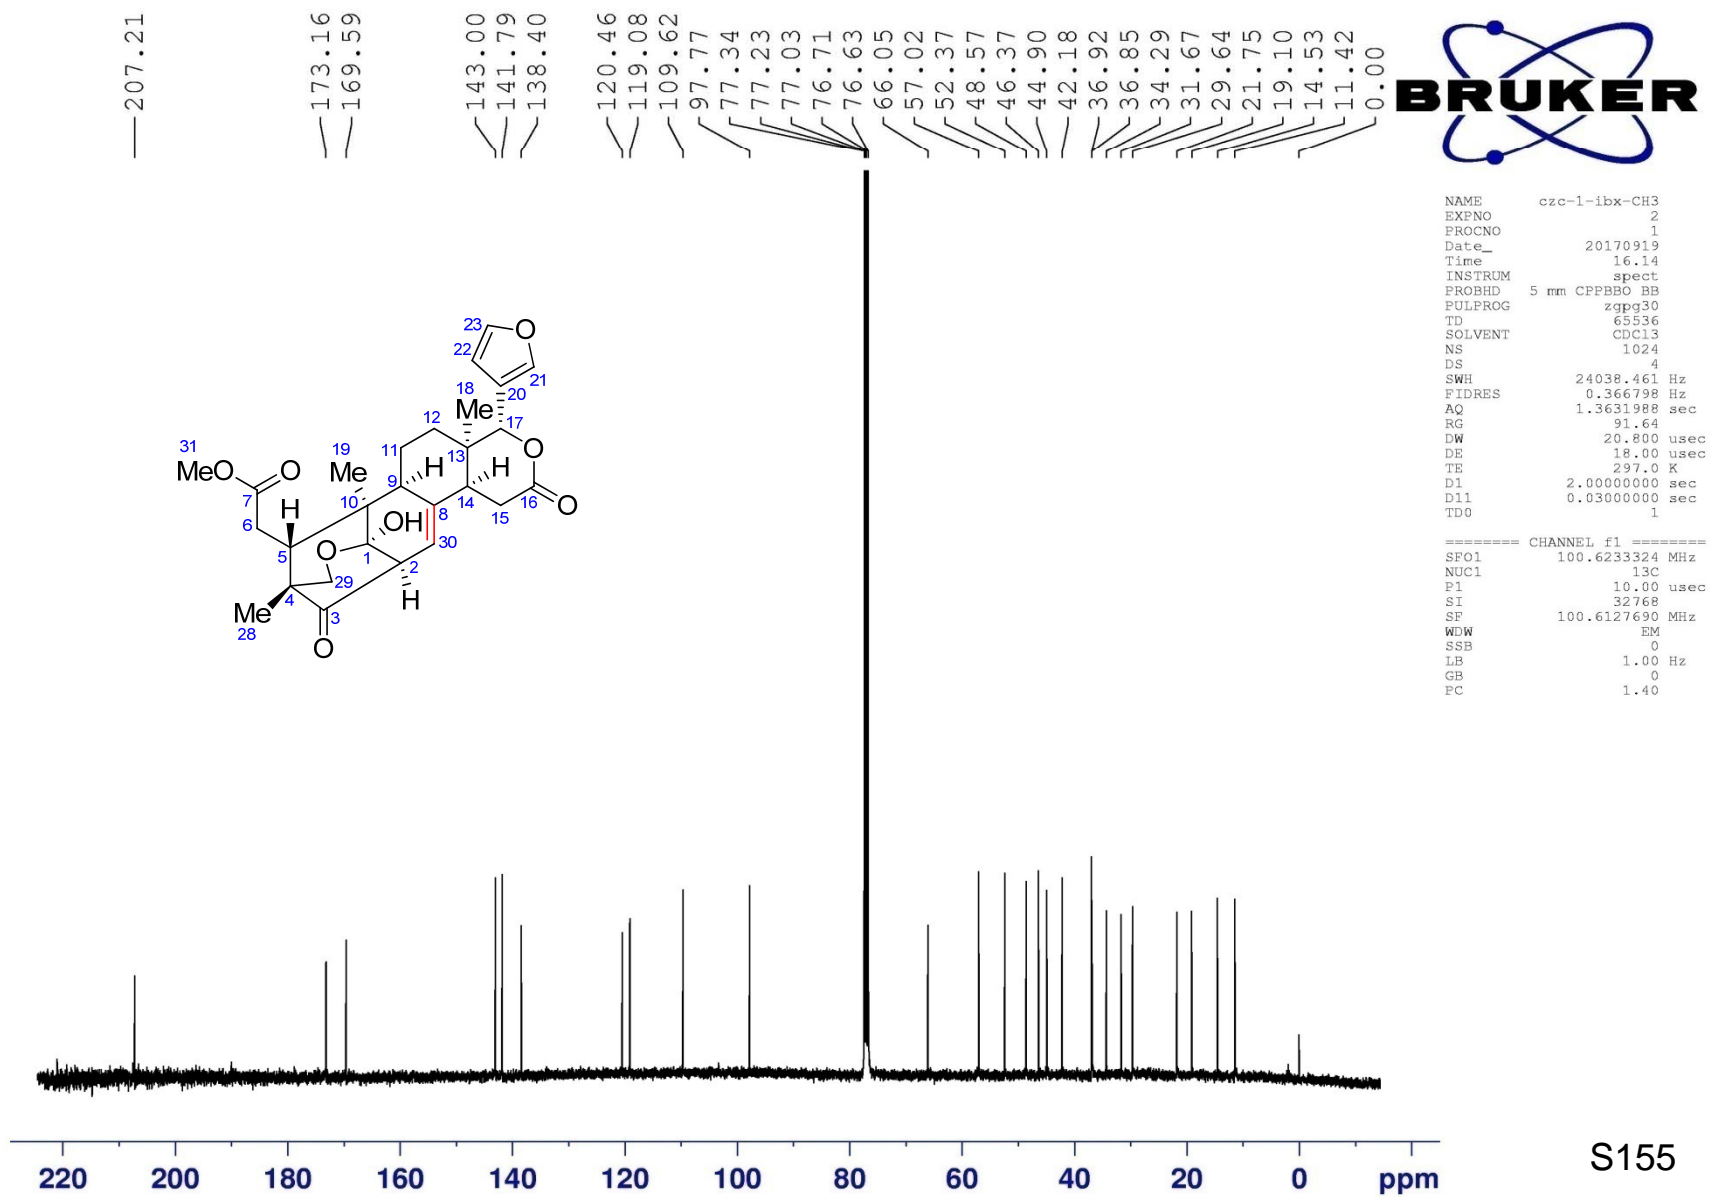

$^{13}\text{C}$  NMR (100 MHz) spectrum of **9** in  $\text{CDCl}_3$

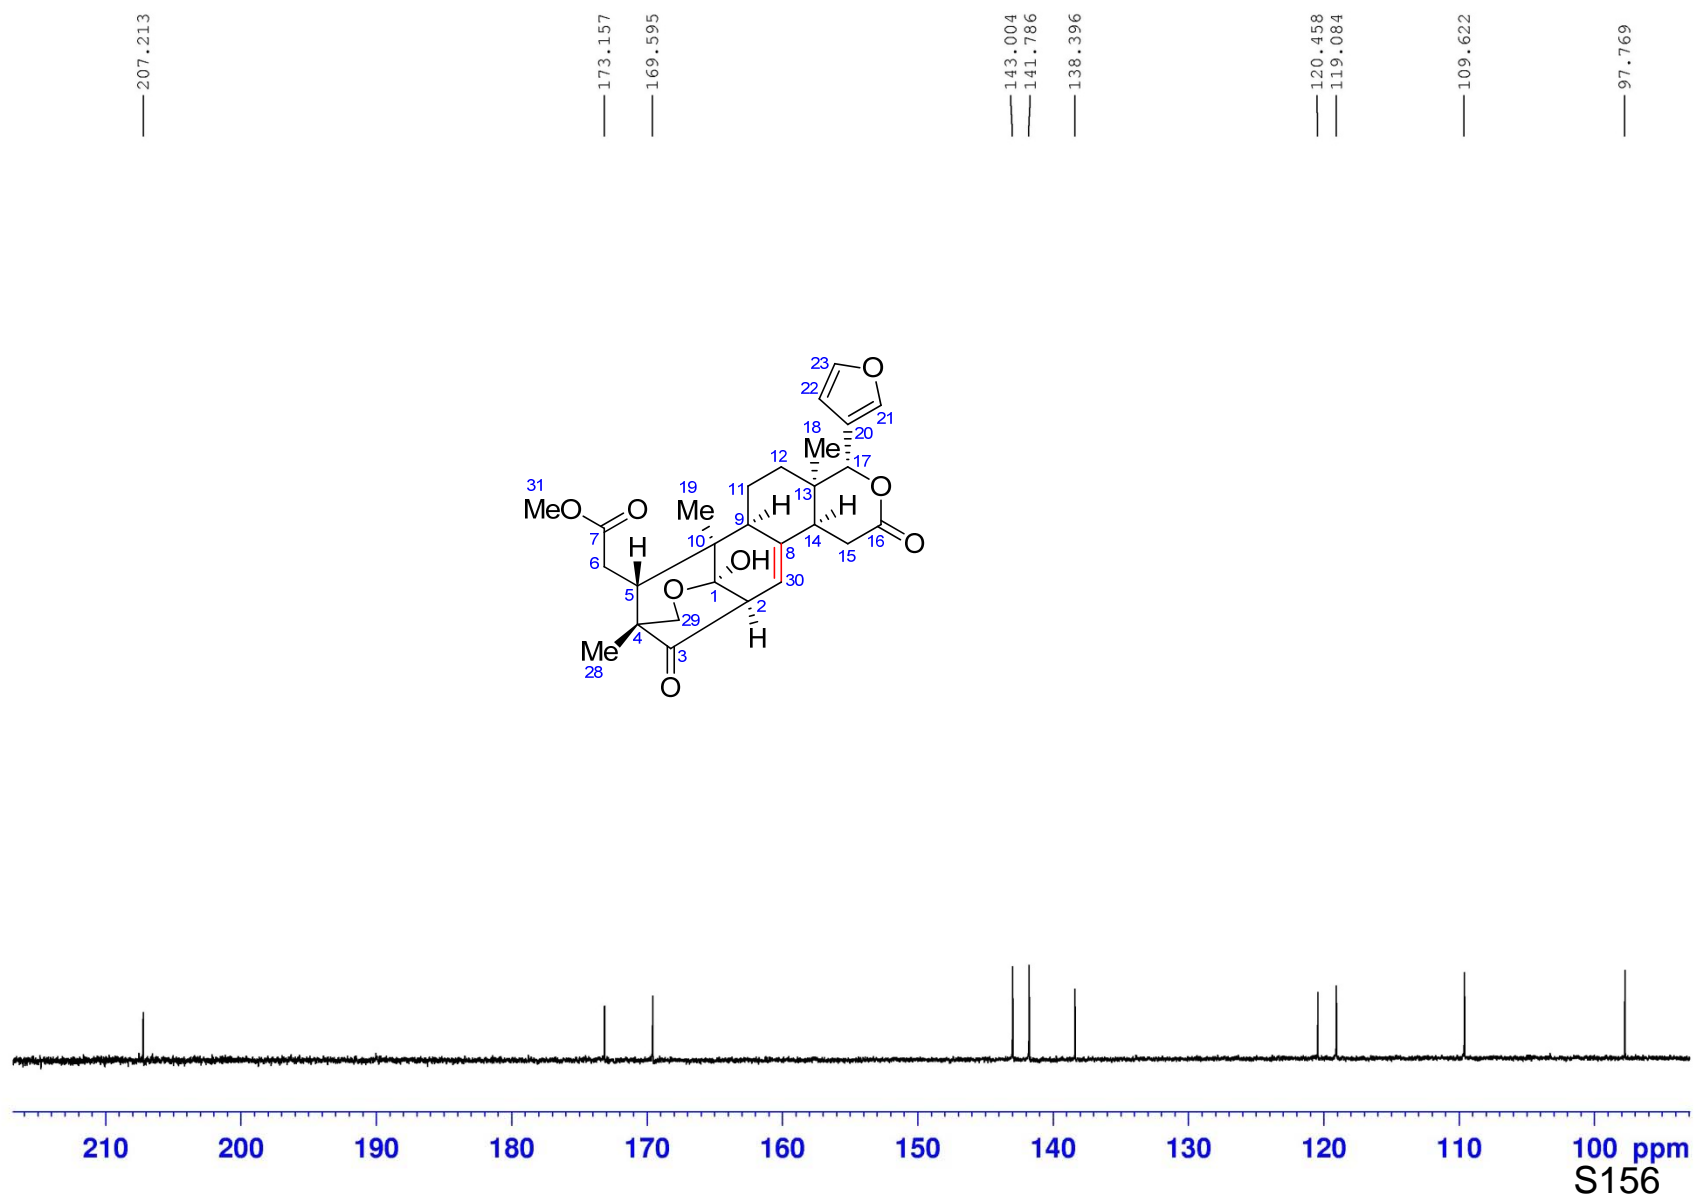

$^{13}\text{C}$  NMR (100 MHz) spectrum of **9** in  $\text{CDCl}_3$

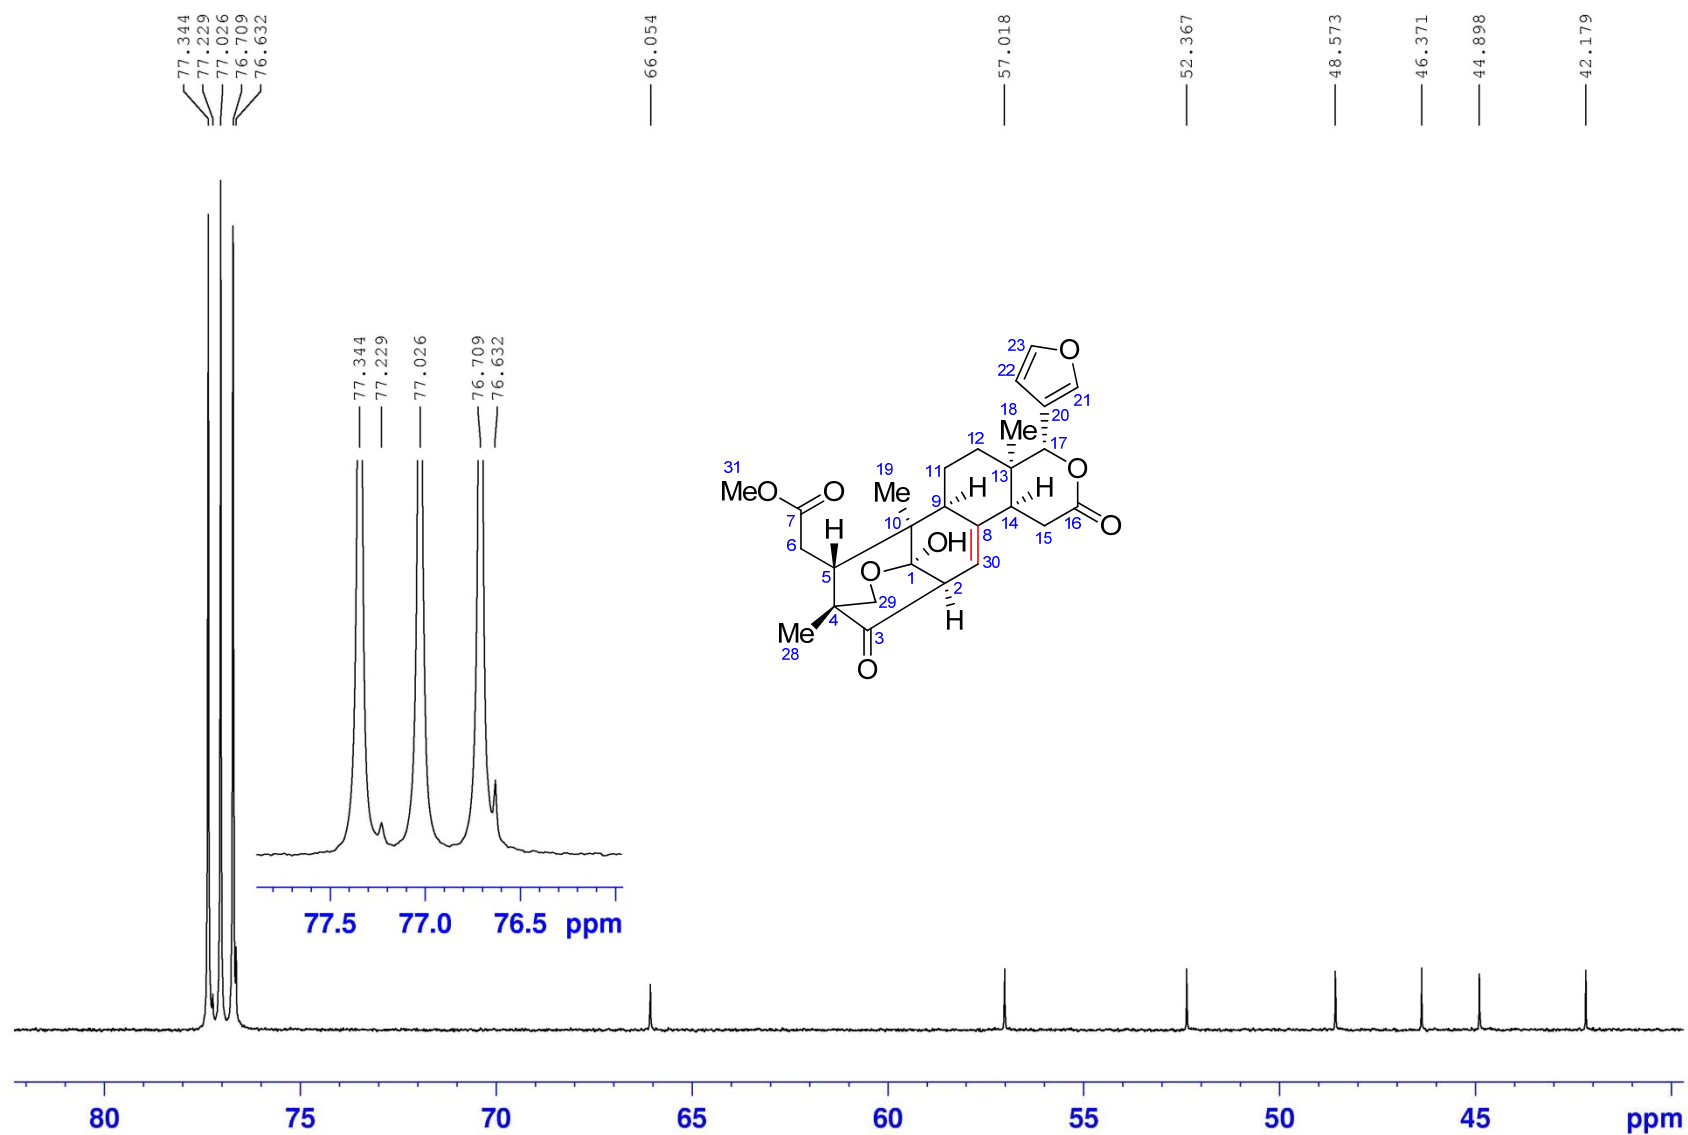

$^{13}\text{C}$  NMR (100 MHz) spectrum of **9** in  $\text{CDCl}_3$

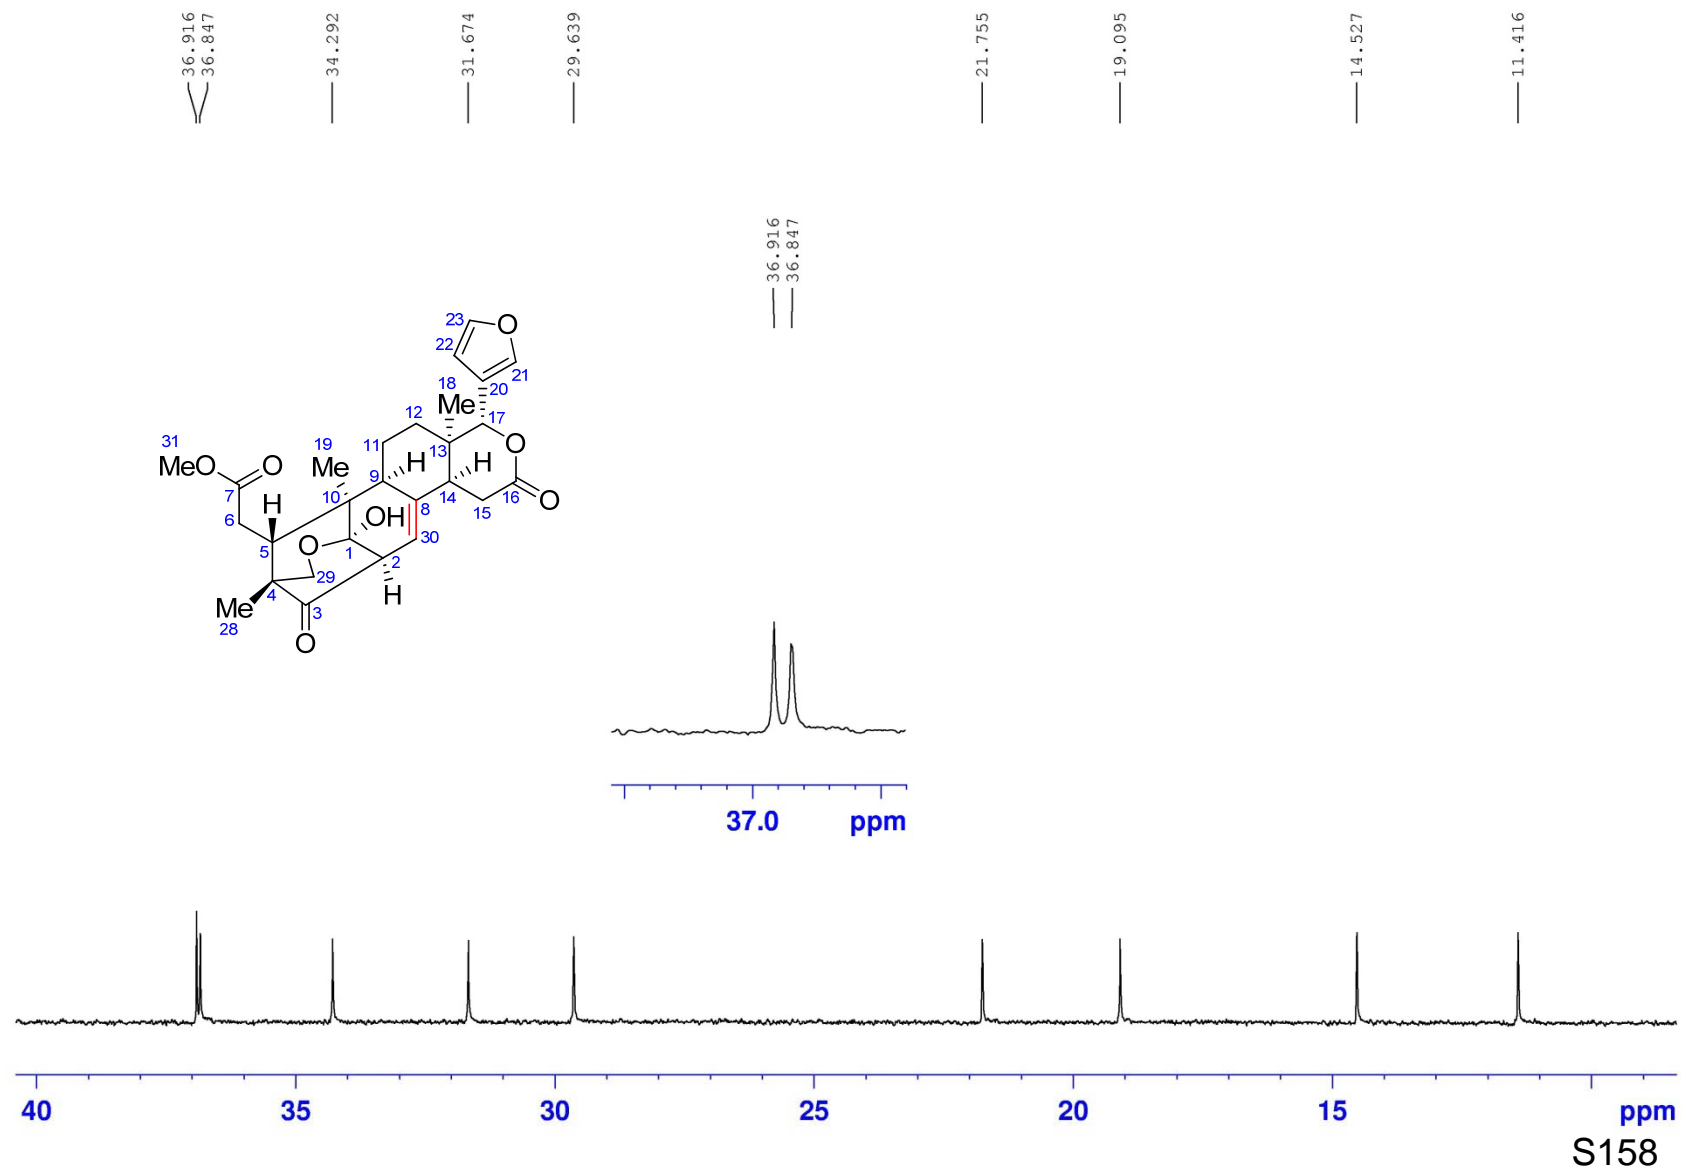

# DEPT 135 spectrum of **9** in CDCl<sub>3</sub>

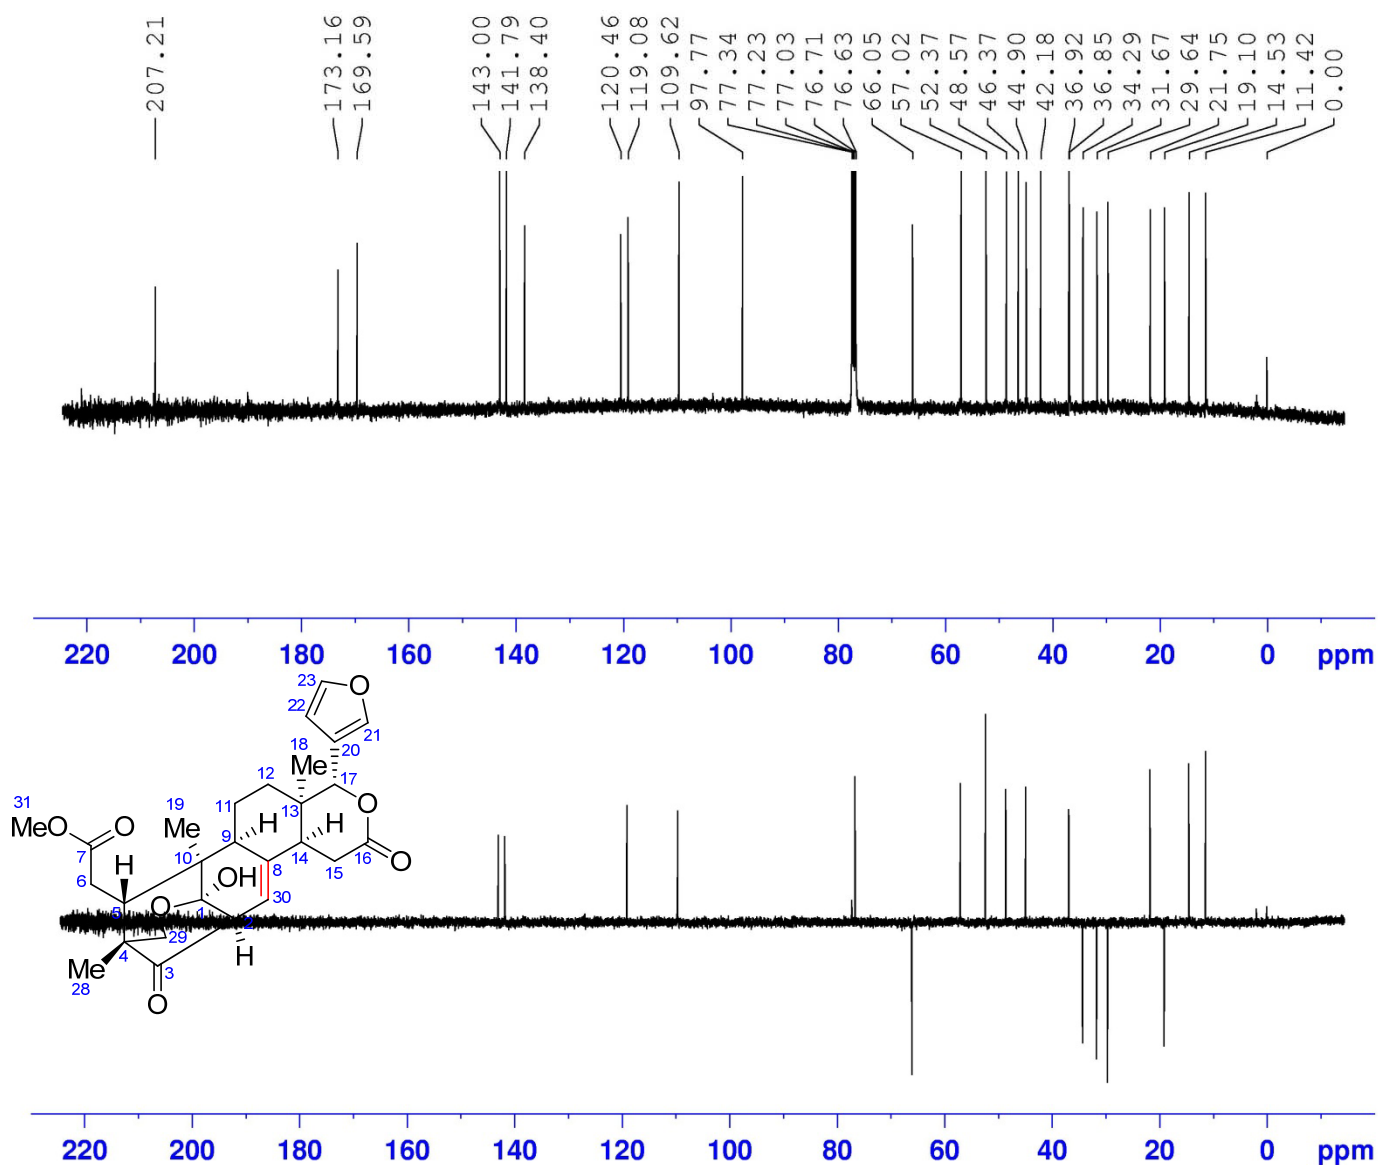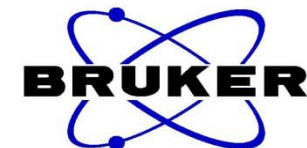

NAME czc-1-ibx-CH3  
 EXPNO 3  
 PROCNO 1  
 Date\_ 20170919  
 Time 16.32  
 INSTRUM spect  
 PROBHD 5 mm CPPBBO BB  
 PULPROG depts135  
 TD 65536  
 SOLVENT CDCl3  
 NS 300  
 DS 4  
 SWH 24038.461 Hz  
 FIDRES 0.366798 Hz  
 AQ 1.3631988 sec  
 RG 130.26  
 DW 20.800 usec  
 DE 18.00 usec  
 TE 297.0 K  
 CNST2 145.0000000  
 D1 2.00000000 sec  
 D2 0.00344828 sec  
 D12 0.00002000 sec  
 TD0 1

===== CHANNEL f1 =====  
 SF01 100.6233324 MHz  
 NUC1 13C  
 P1 10.00 usec  
 P13 2000.00 usec  
 SI 32768  
 SF 100.6127692 MHz  
 WDW EM  
 SSB 0  
 LB 1.00 Hz  
 GB 0  
 PC 1.40

DEPT 135 spectrum of **9** in  $\text{CDCl}_3$

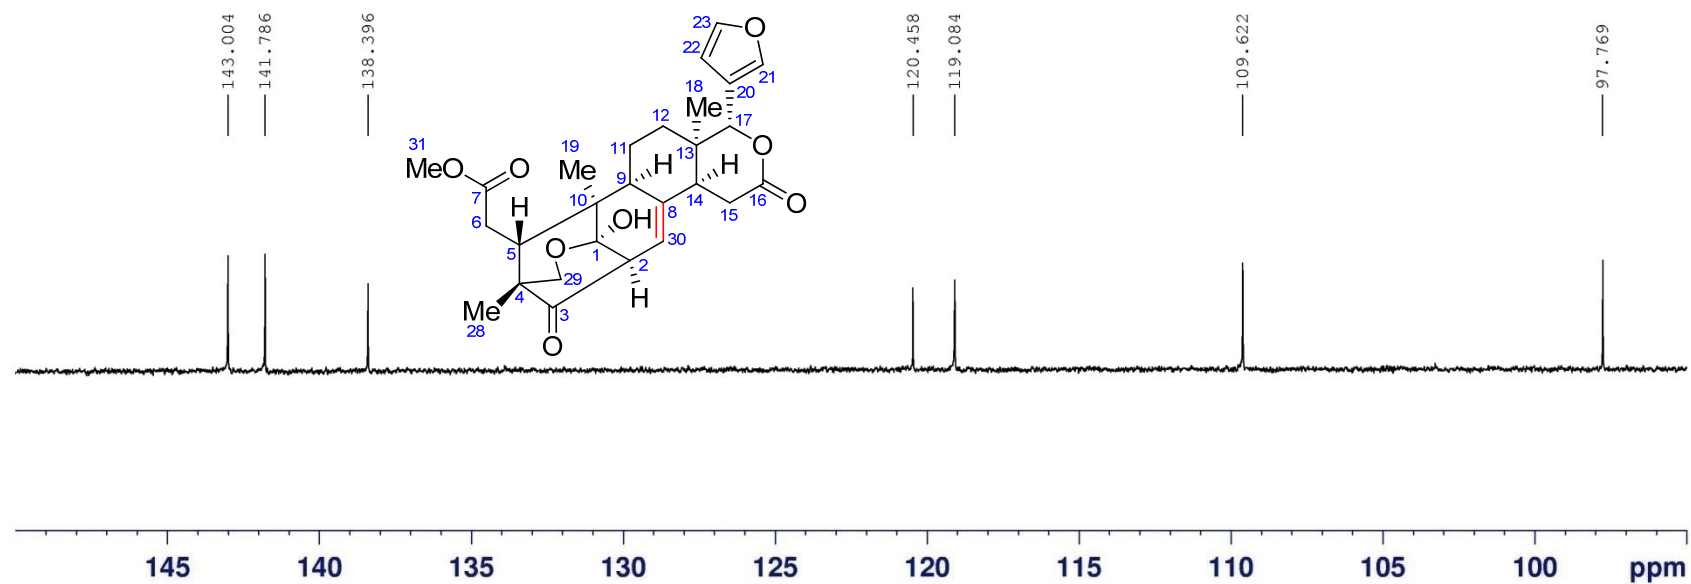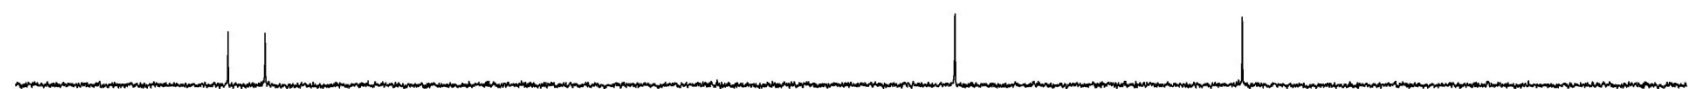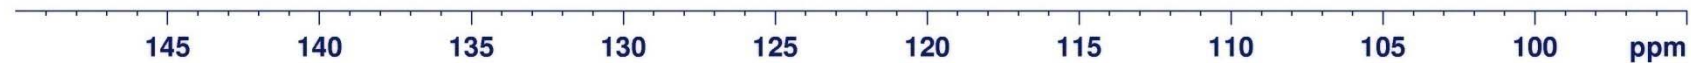

DEPT 135 spectrum of **9** in CDCl<sub>3</sub>

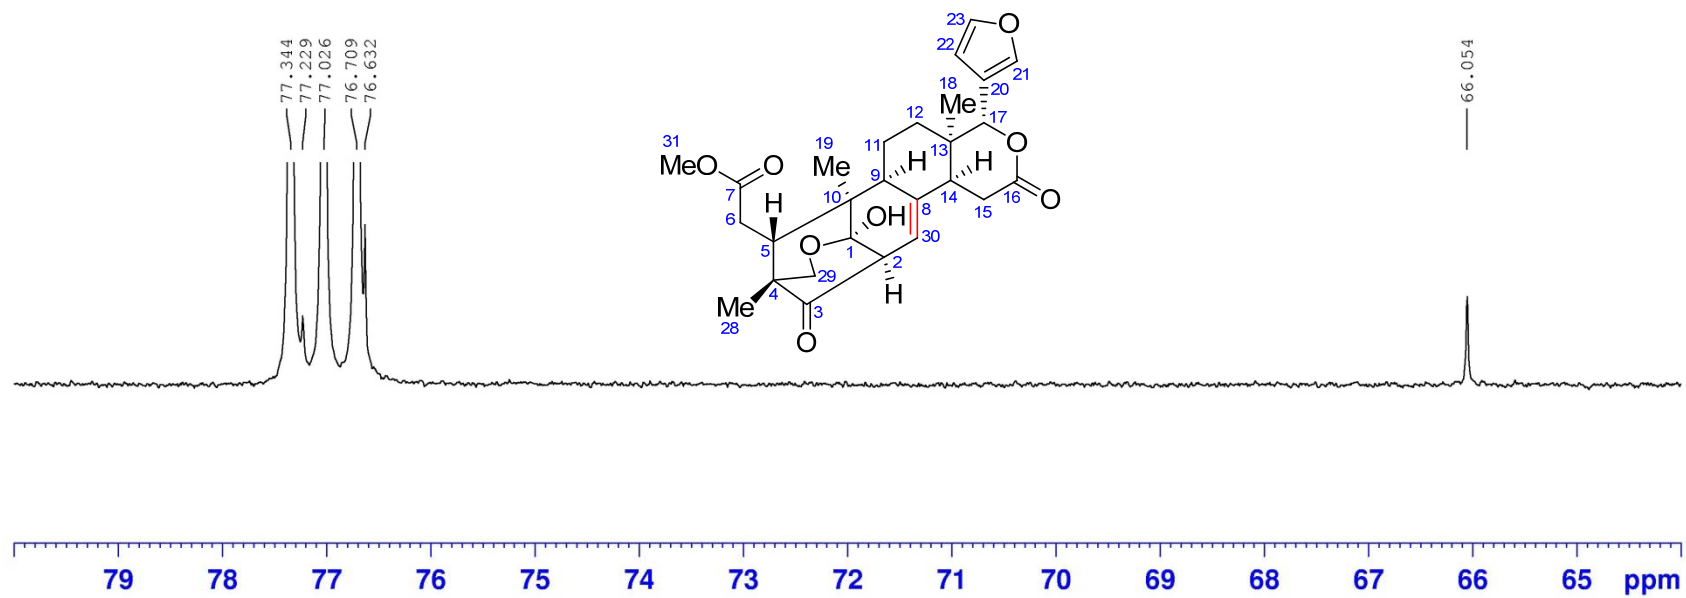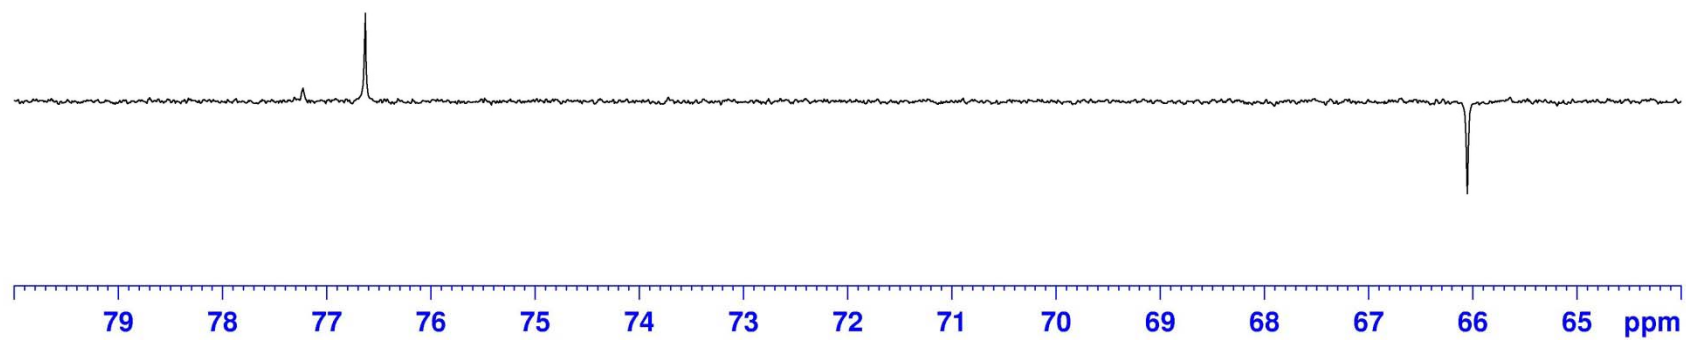

S161

DEPT 135 spectrum of **9** in  $\text{CDCl}_3$

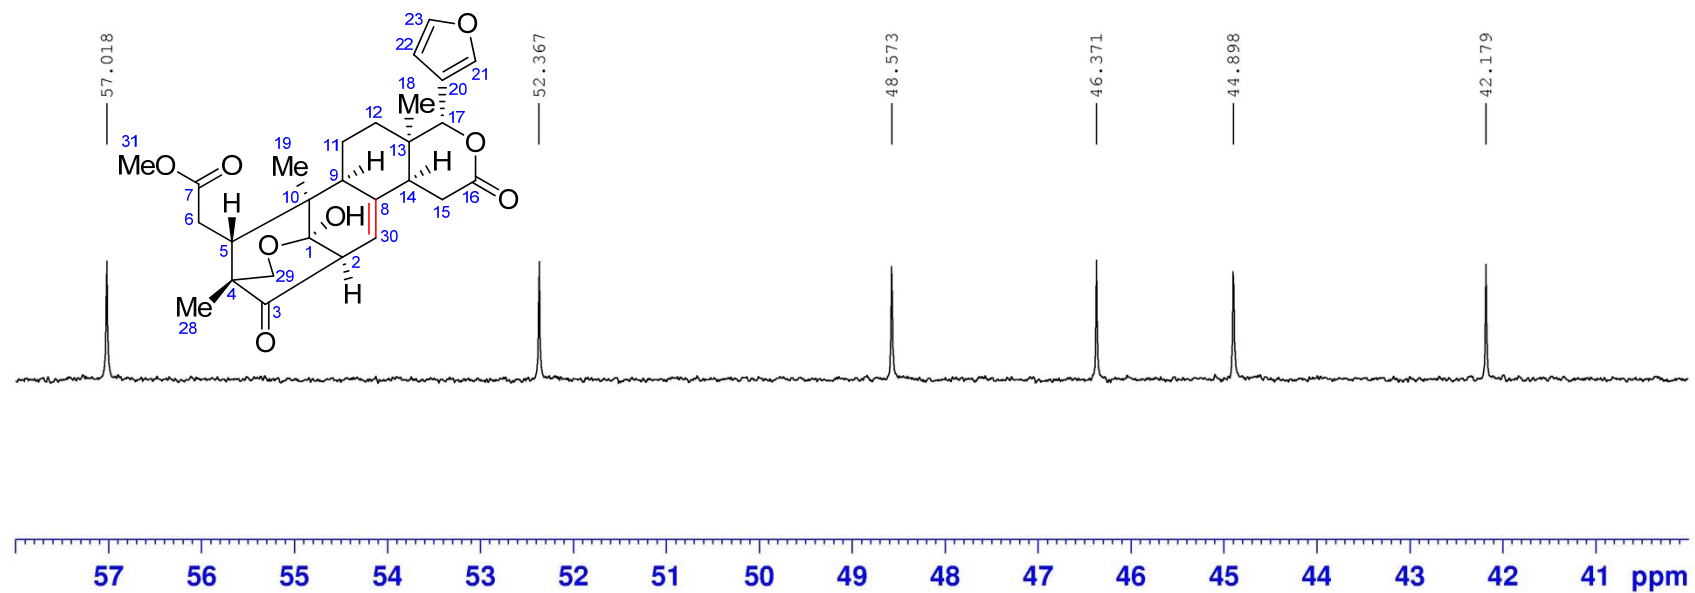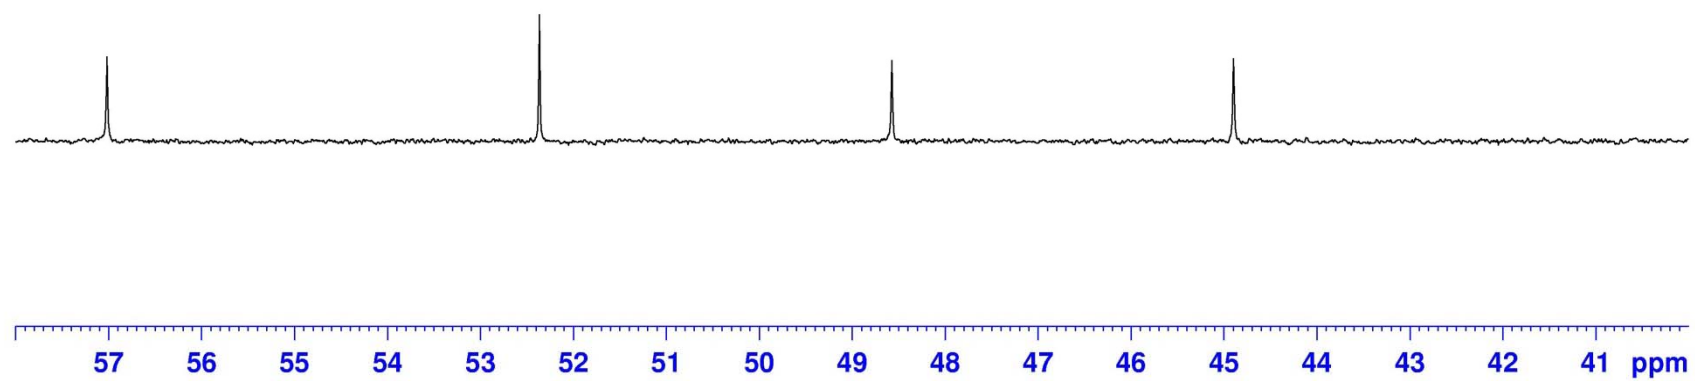



DEPT 135 spectrum of **9** in CDCl<sub>3</sub>

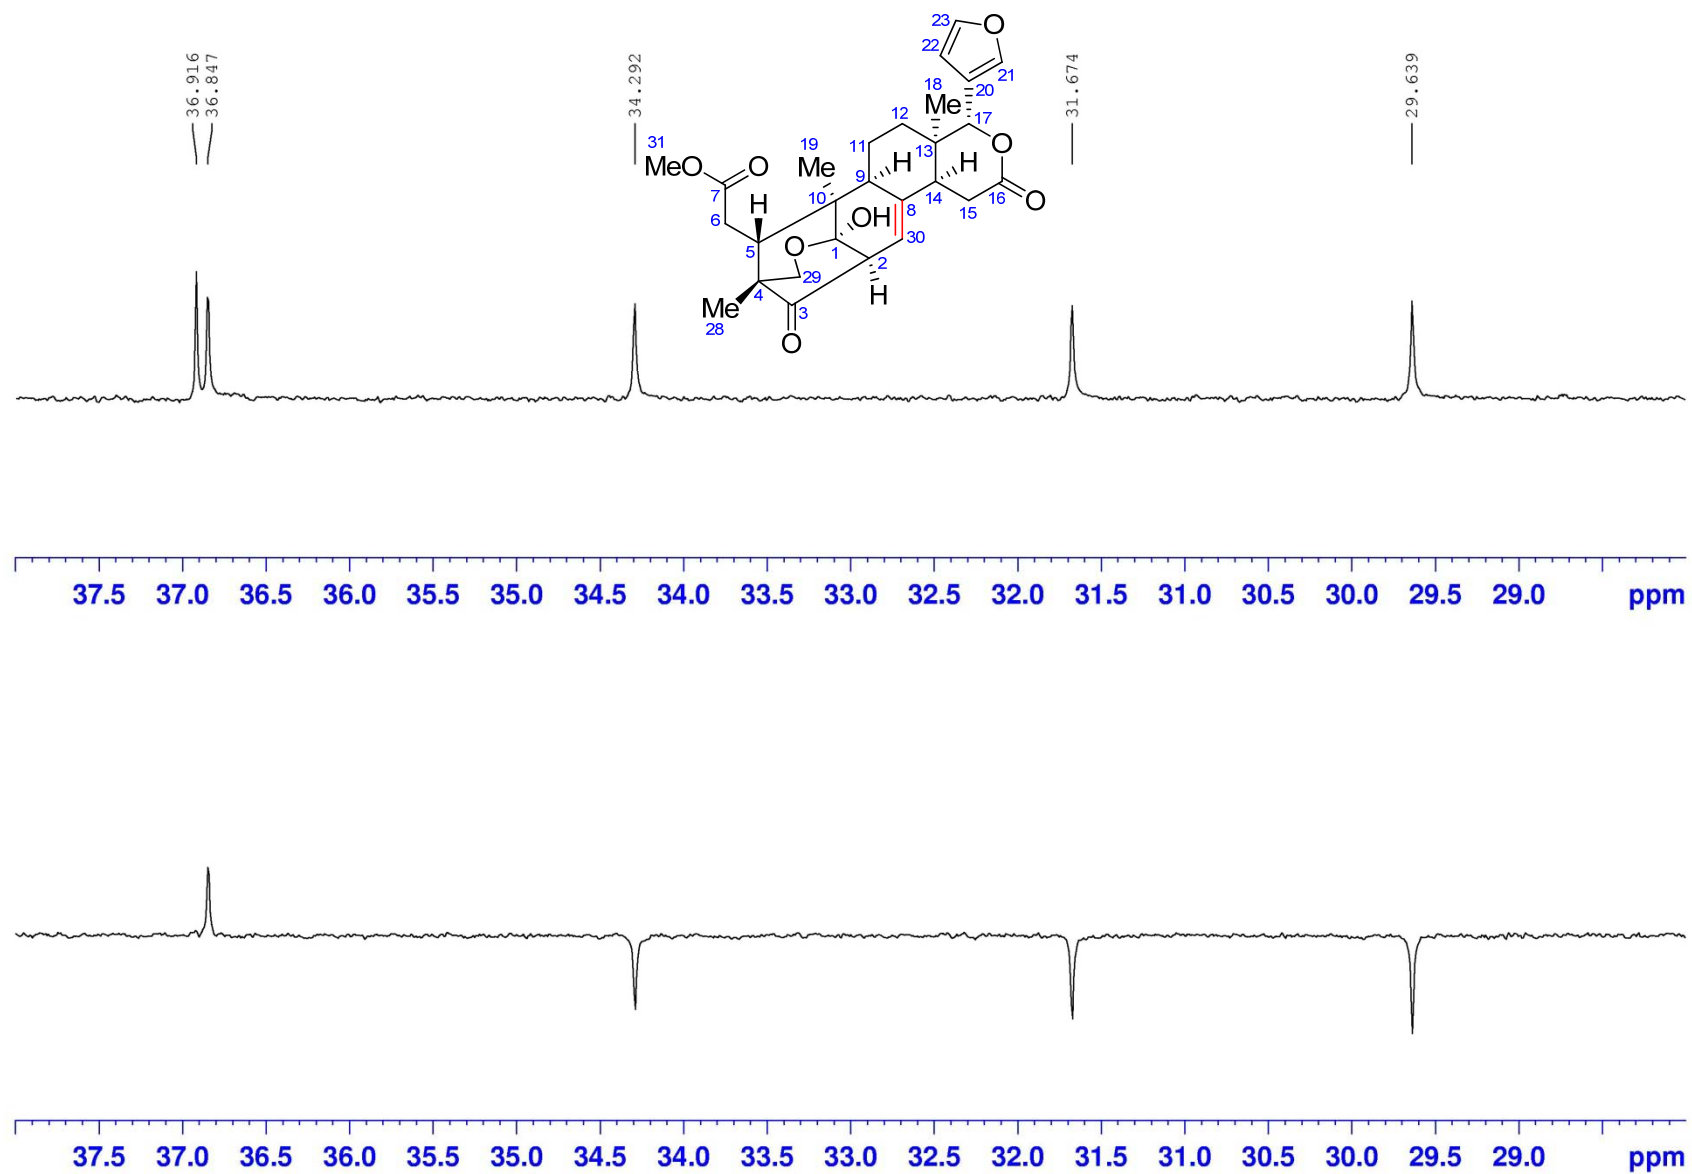

S163

DEPT 135 spectrum of **9** in  $\text{CDCl}_3$

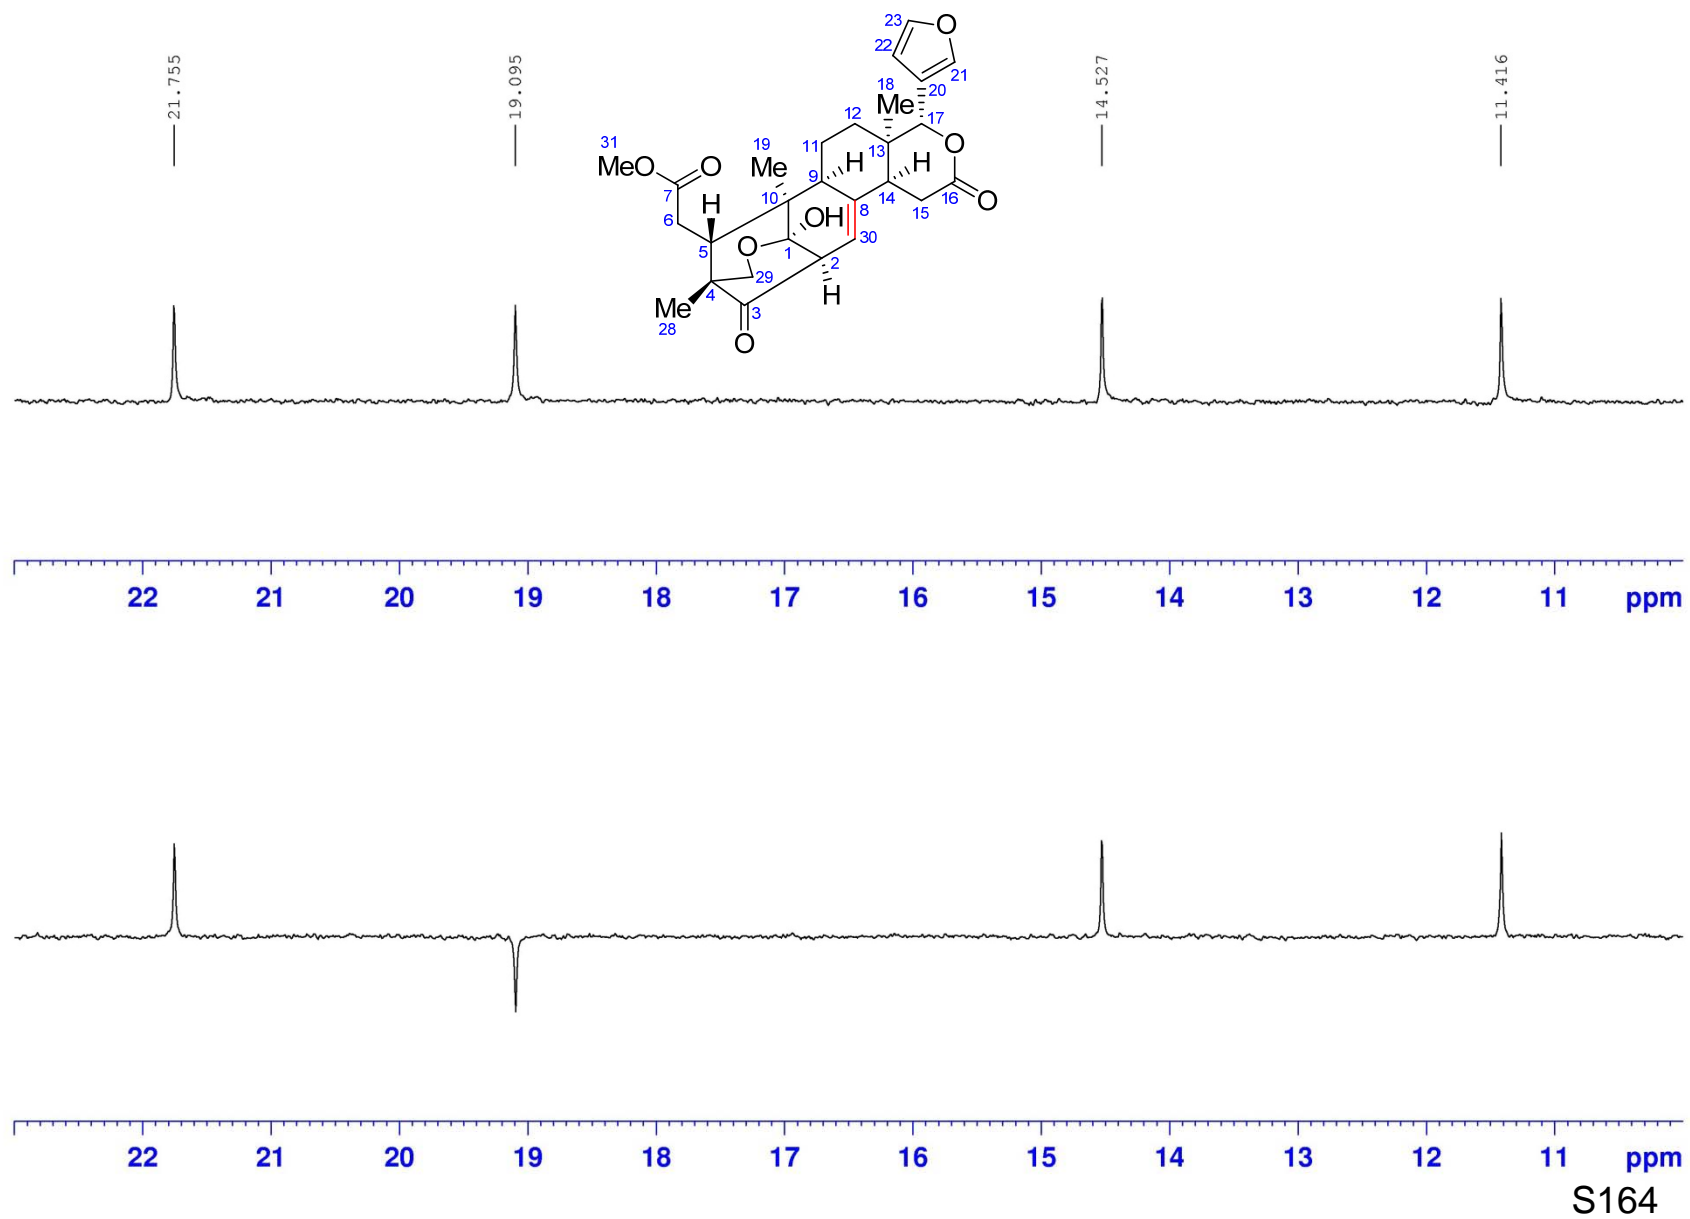

# LR-ESIMS for compound **9a**

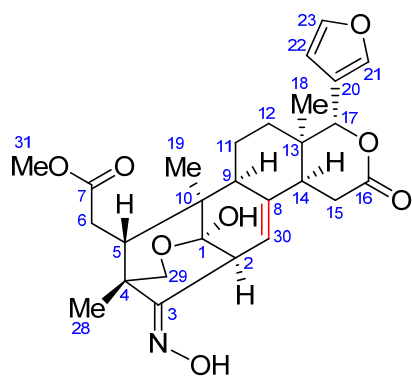

## Generic Display Report

Analysis Info  
Analysis Name D:\MS\RJL\20181001\66-1\_RA1\_01\_1592.d  
Method lc-7.9  
Sample Name 66140922-alternating-500-50-2200-MS2\_1592.m  
Comment  
Acquisition D 2018/10/1 20:32:42  
Operator bruker  
Instrument amaZon SL

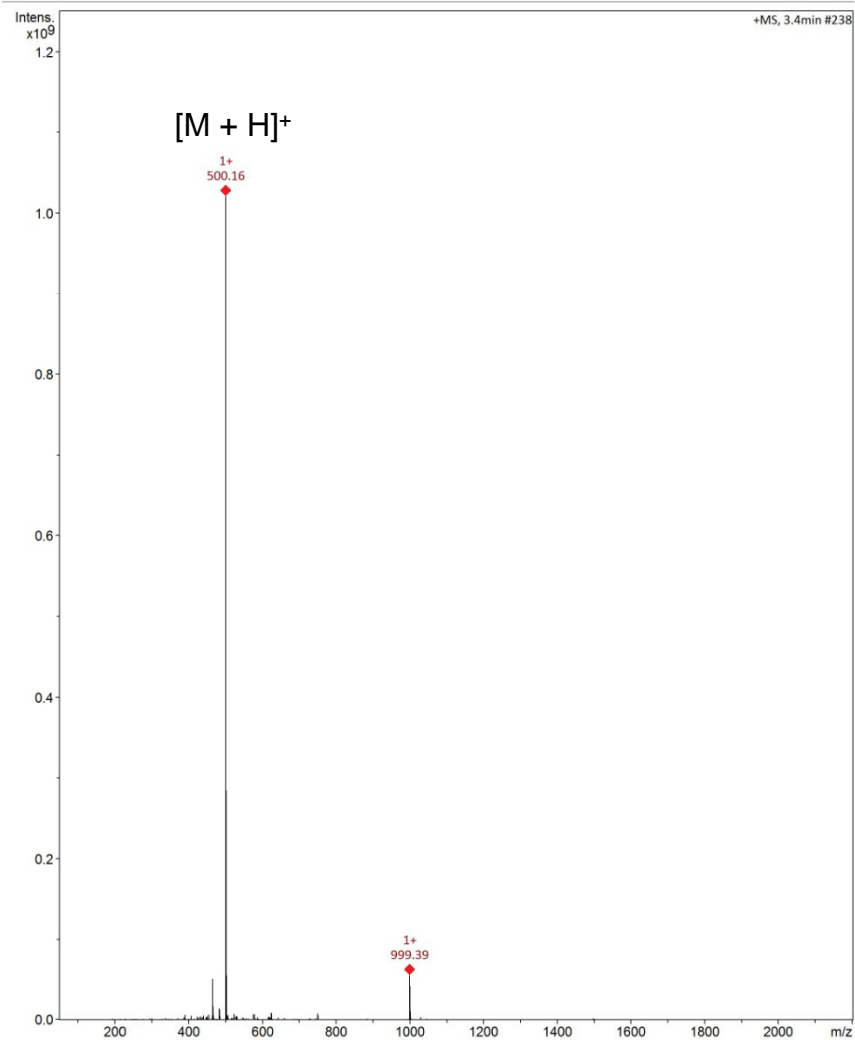

Bruker Compass DataAnalysis

# <sup>1</sup>H NMR (400 MHz) spectrum of **9a** in CDCl<sub>3</sub>

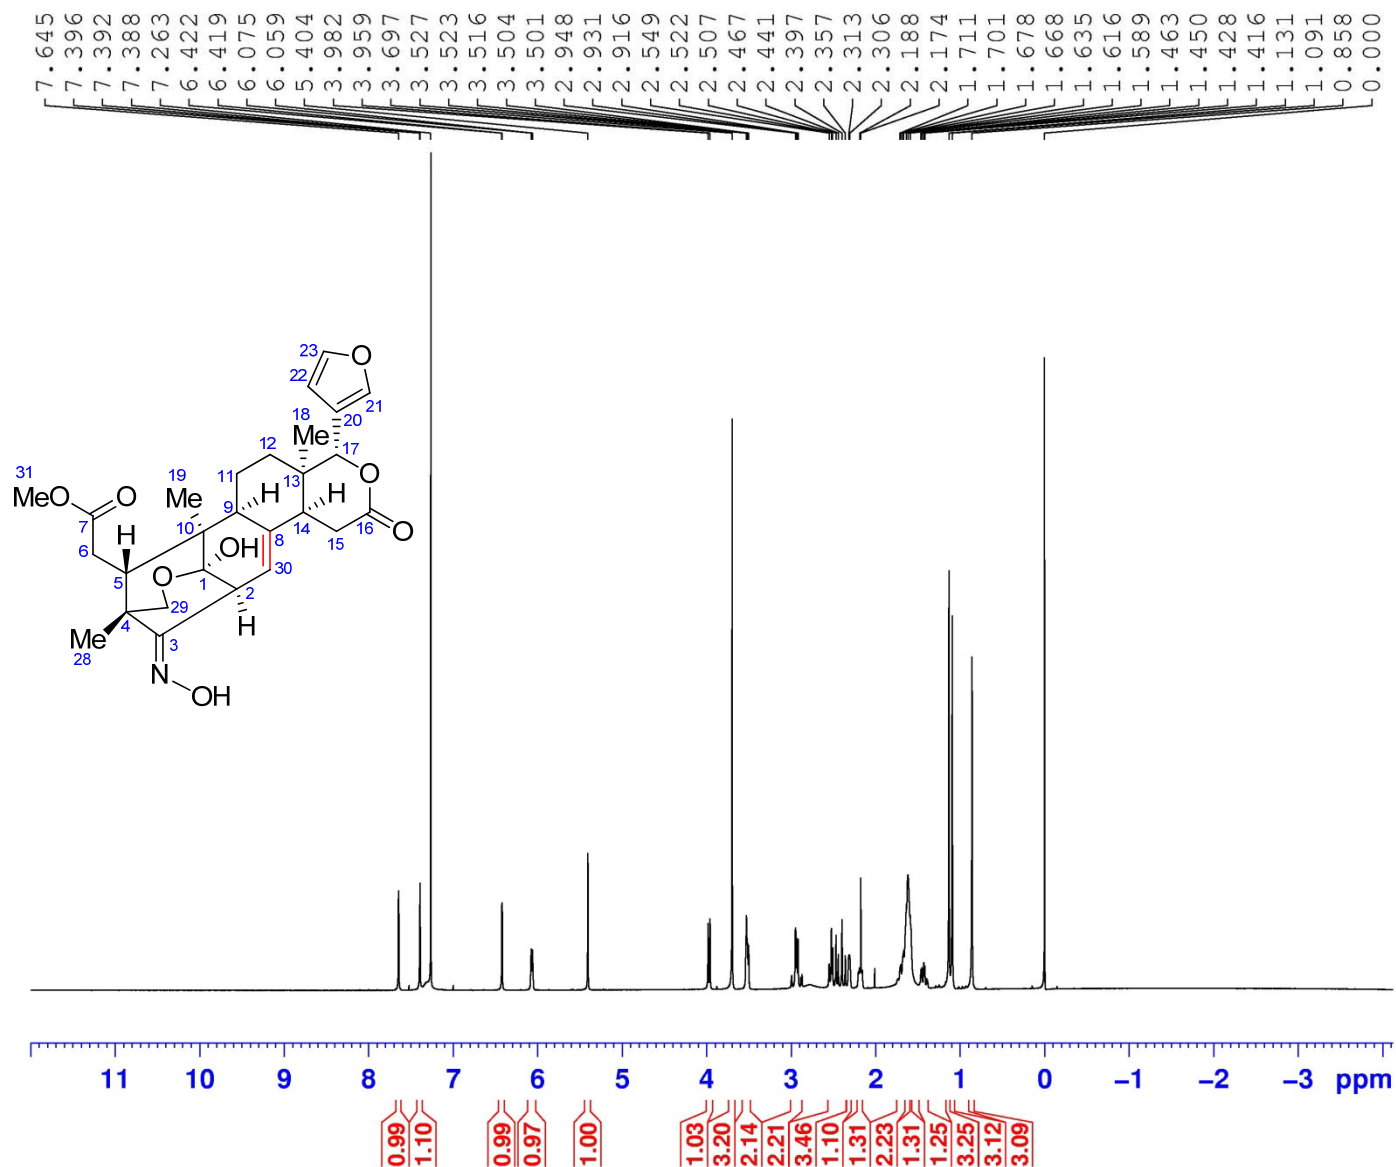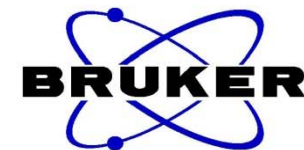

```

NAME      czc-1-ibx-CH3-yansuanqianan
EXPNO     1
PROCNO    1
Date_     20171001
Time      21.06
INSTRUM   spect
PROBHD    5 mm CFPBBO BB
PULPROG   zg30
TD         65536
SOLVENT   CDCl3
NS         16
DS         2
SWH        8223.695 Hz
FIDRES     0.125483 Hz
AQ         3.9846387 sec
RG         208.5
DW         60.800 usec
DE         10.00 usec
TE         297.0 K
D1         1.00000000 sec
TD0        1

===== CHANNEL f1 =====
SFO1      400.1324710 MHz
NUC1      1H
P1        11.50 usec
SI        65536
SF        400.1300084 MHz
WDW       EM
SSB       0
LB        0.30 Hz
GB        0
PC        1.00
    
```

$^1\text{H}$  NMR (400 MHz) spectrum of **9a** in  $\text{CDCl}_3$

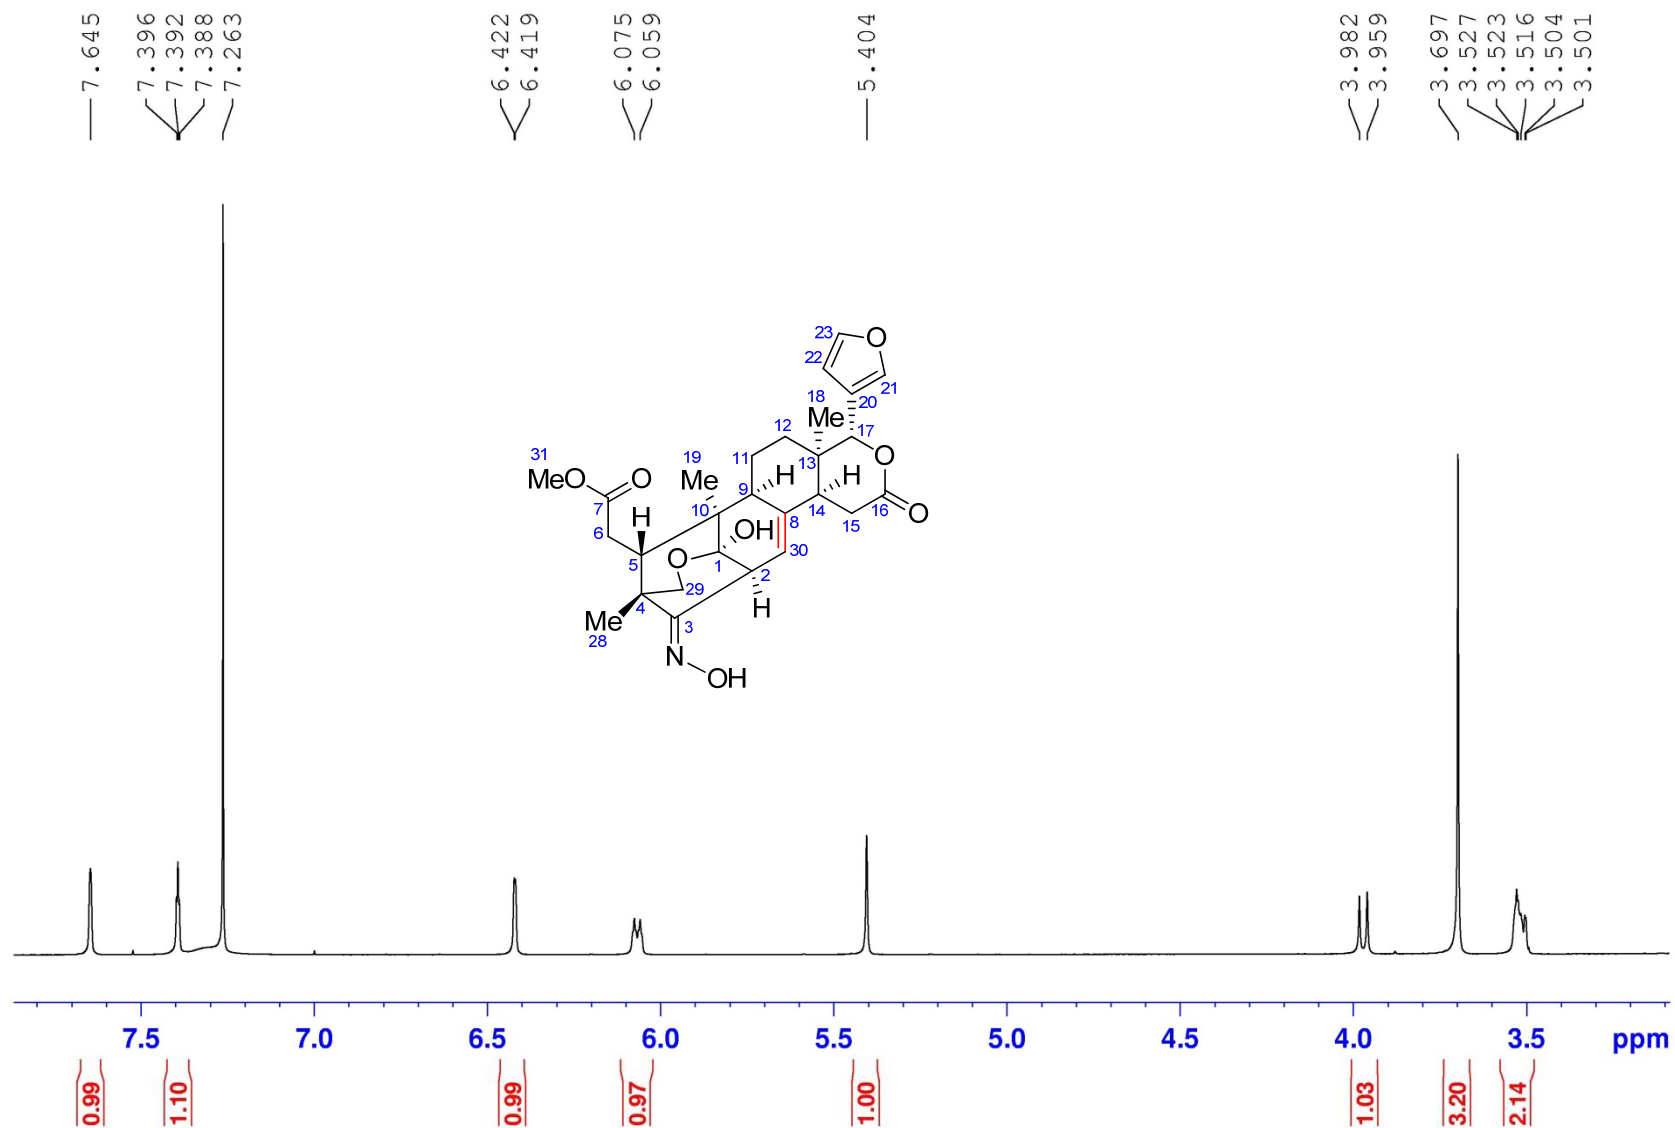

S167

$^1\text{H}$  NMR (400 MHz) spectrum of **9a** in  $\text{CDCl}_3$

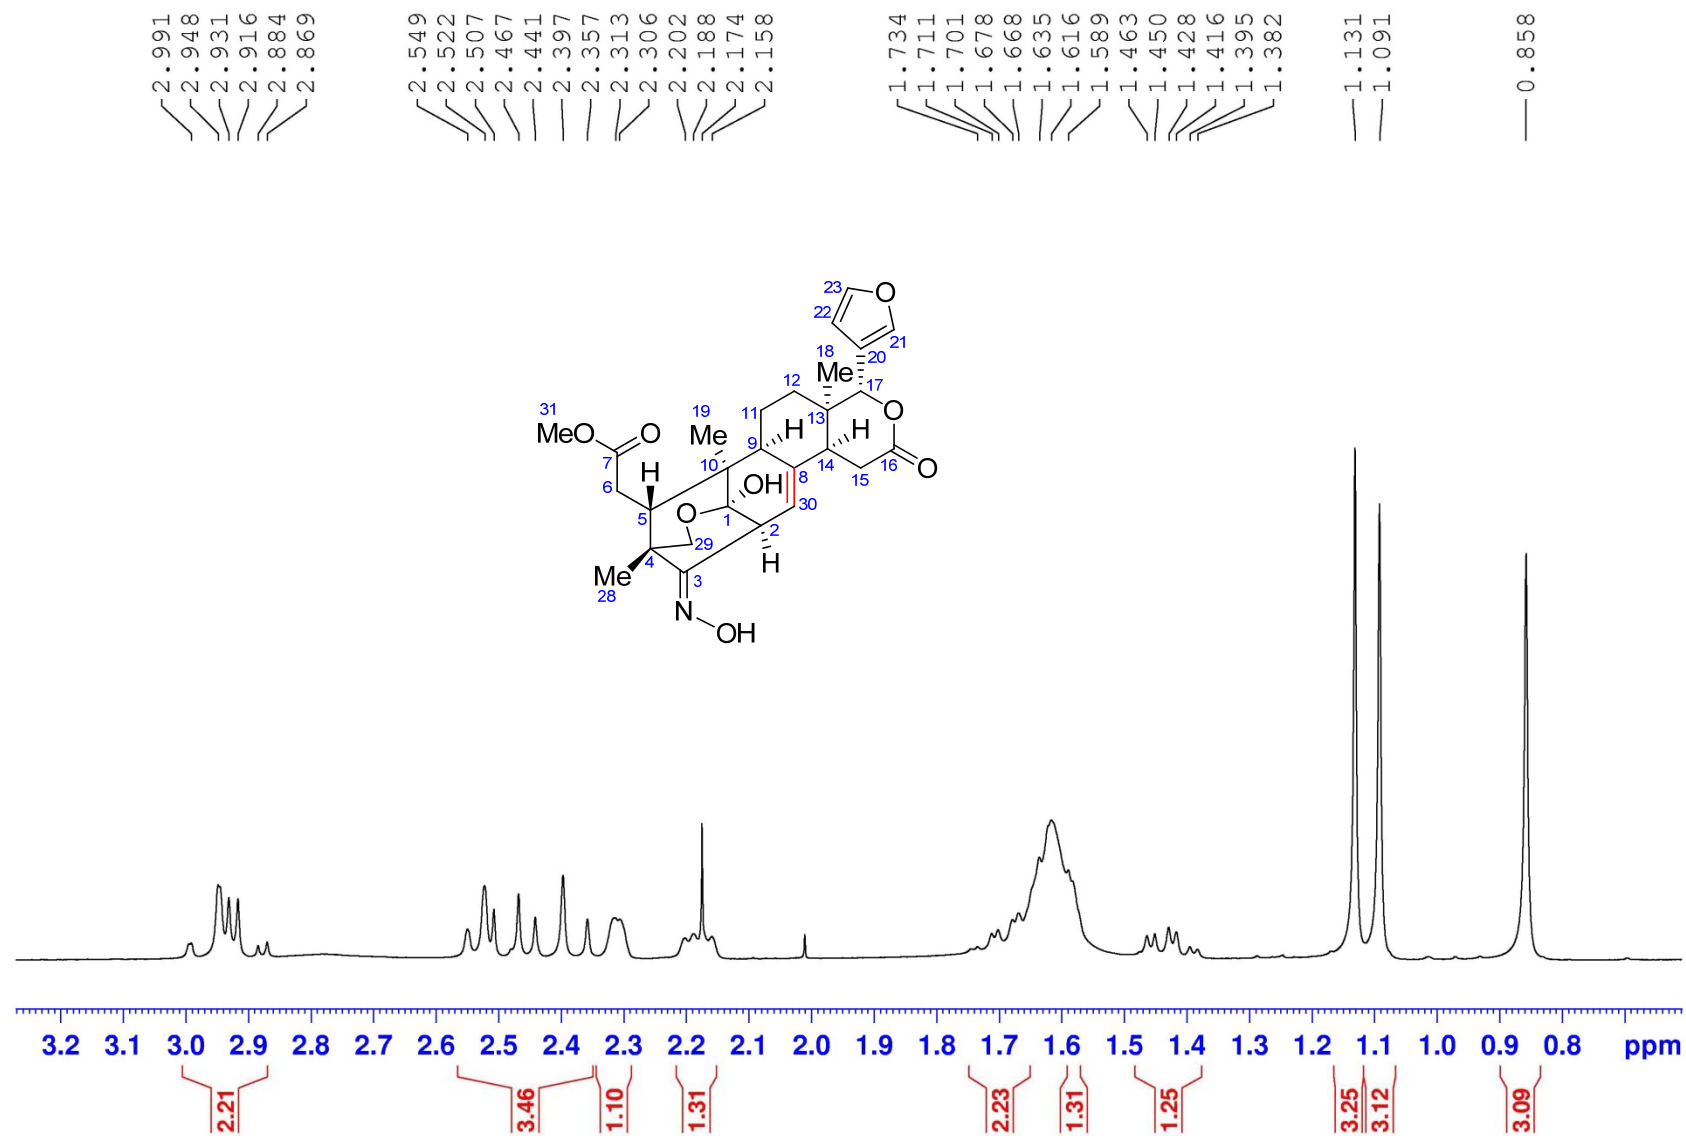

$^{13}\text{C}$  NMR (100 MHz) spectrum of **9a** in  $\text{CDCl}_3$

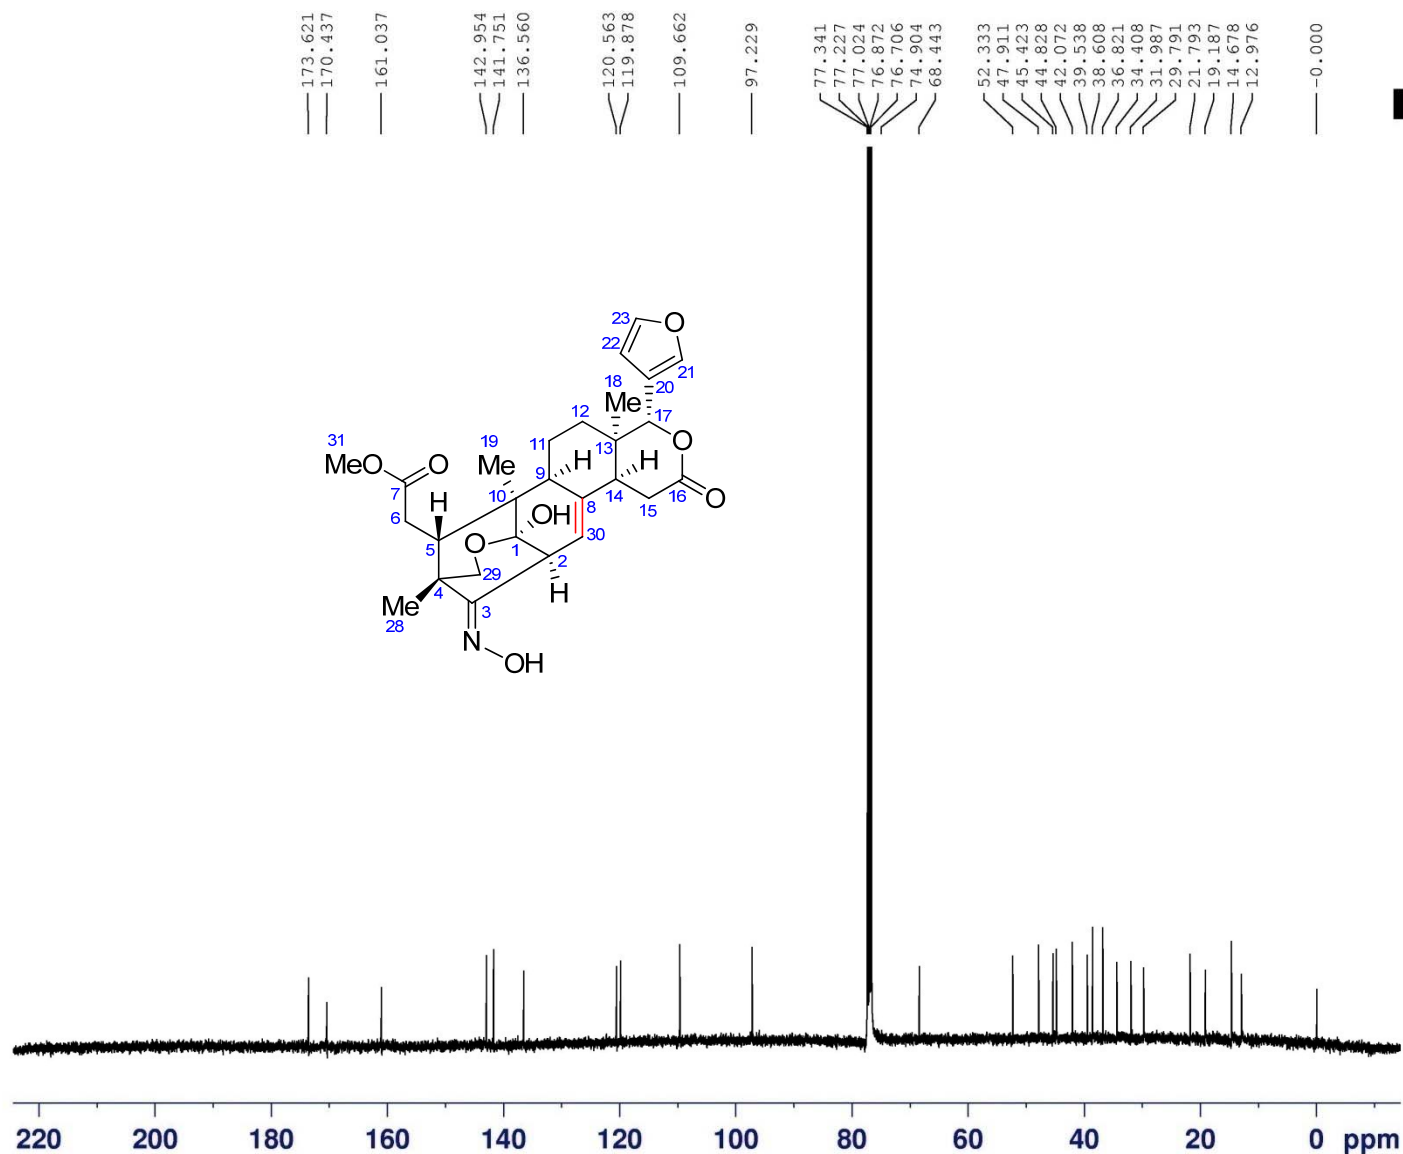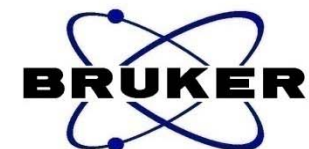

```

NAME      czc-1-ibx-CH3-yansuanqi
EXPNO     2
PROCNO    1
Date_     20171001
Time      22.05
INSTRUM    spect
PROBHD     5 mm CPPBBO BB
PULPROG    zgpg30
TD         65536
SOLVENT    CDCl3
NS         1024
DS         4
SWH        24038.461 Hz
FIDRES     0.366798 Hz
AQ         1.3631988 sec
RG         130.26
DW         20.800 usec
DE         18.00 usec
TE         297.0 K
D1         2.00000000 sec
D11        0.03000000 sec
TD0        1

===== CHANNEL f1 =====
SF01      100.6233324 MHz
NUC1       13C
P1         10.00 usec
SI         32768
SF         100.6127689 MHz
WDW        EM
SSB        0
LB         1.00 Hz
GB         0
PC         1.40
    
```

$^{13}\text{C}$  NMR (100 MHz) spectrum of **9a** in  $\text{CDCl}_3$

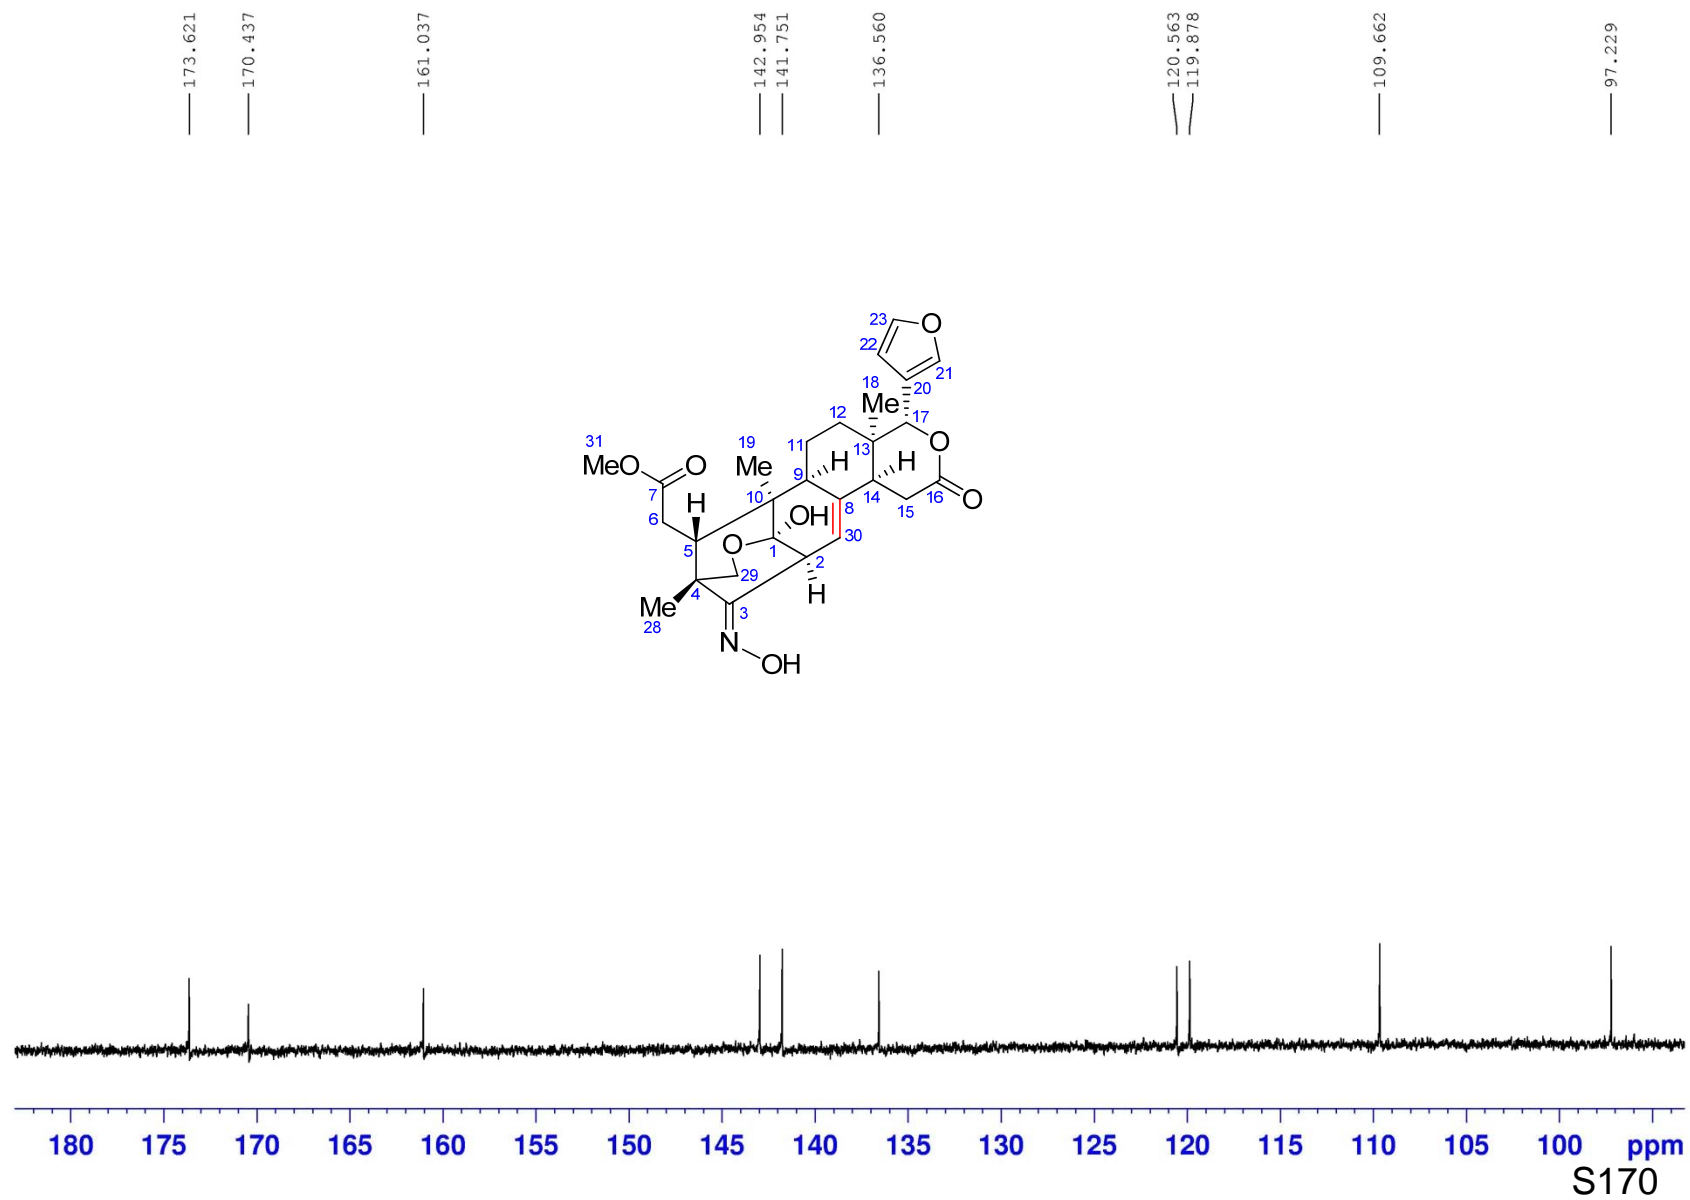



$^{13}\text{C}$  NMR (100 MHz) spectrum of **9a** in  $\text{CDCl}_3$

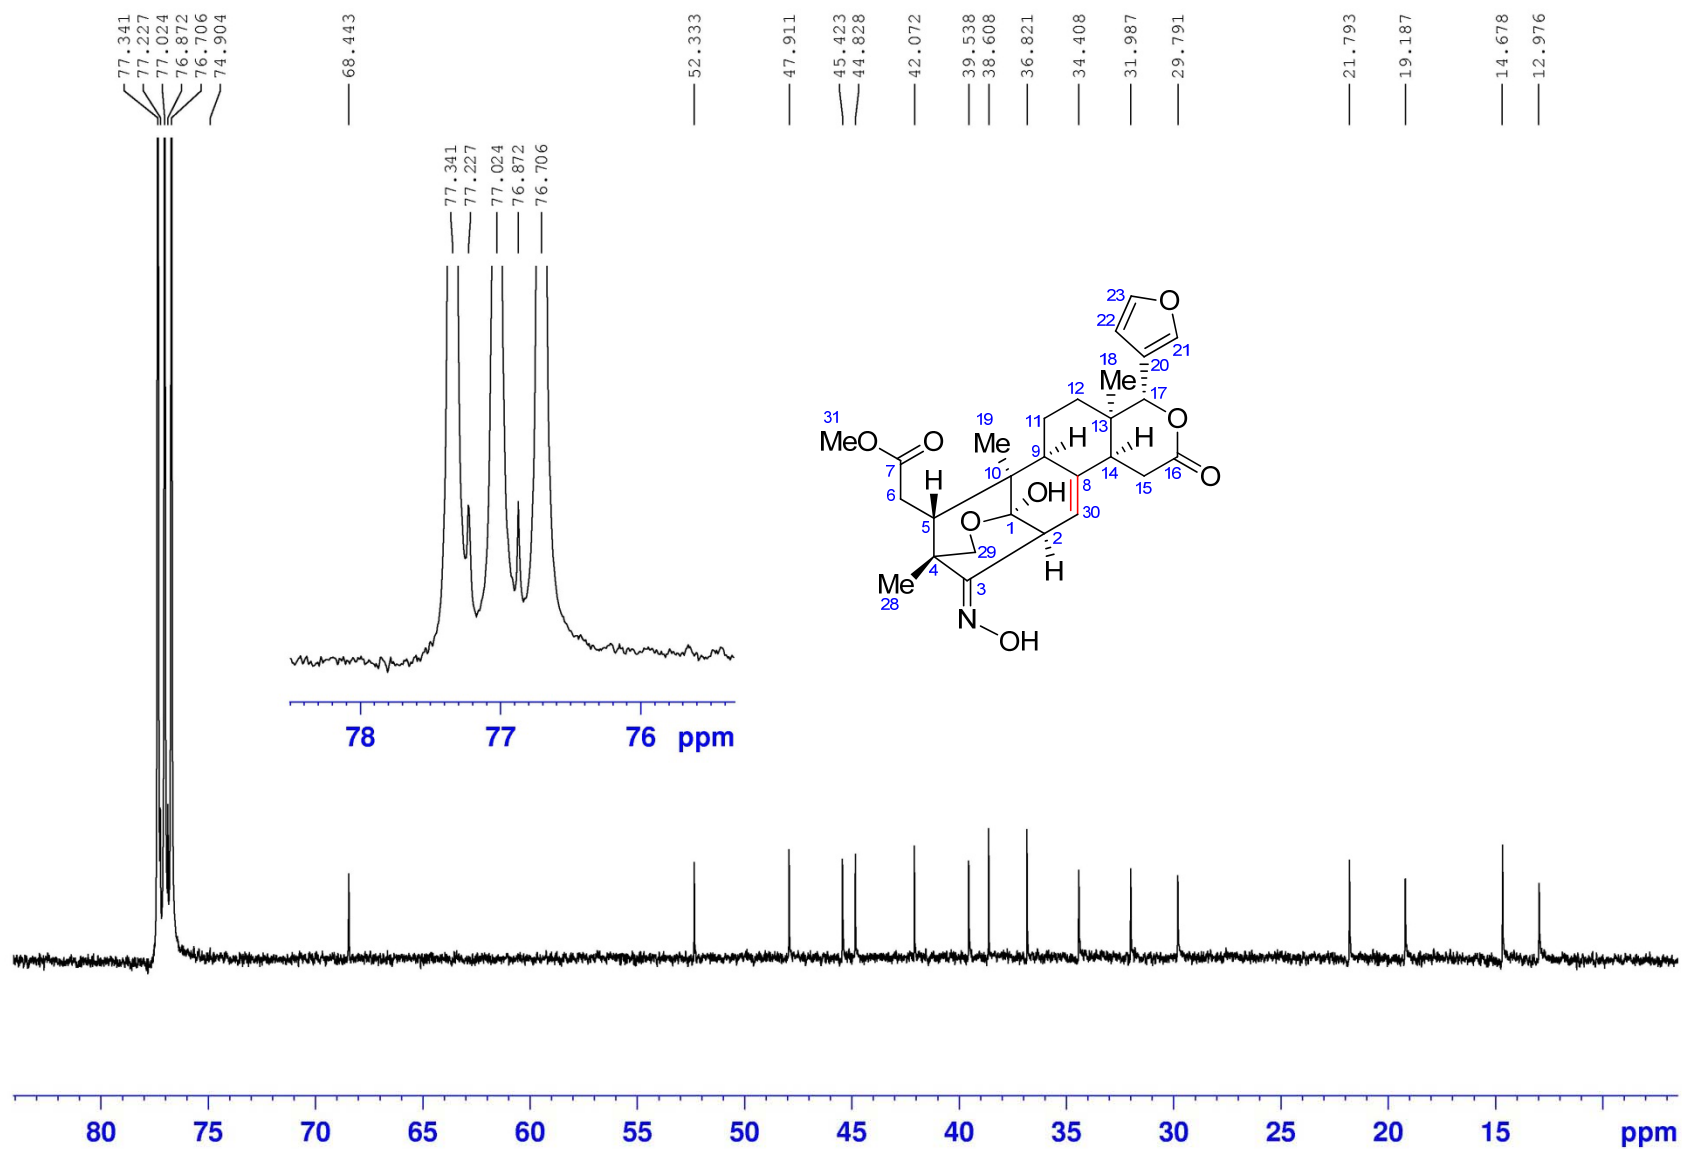

# DEPT 135 spectrum of **9a** in CDCl<sub>3</sub>

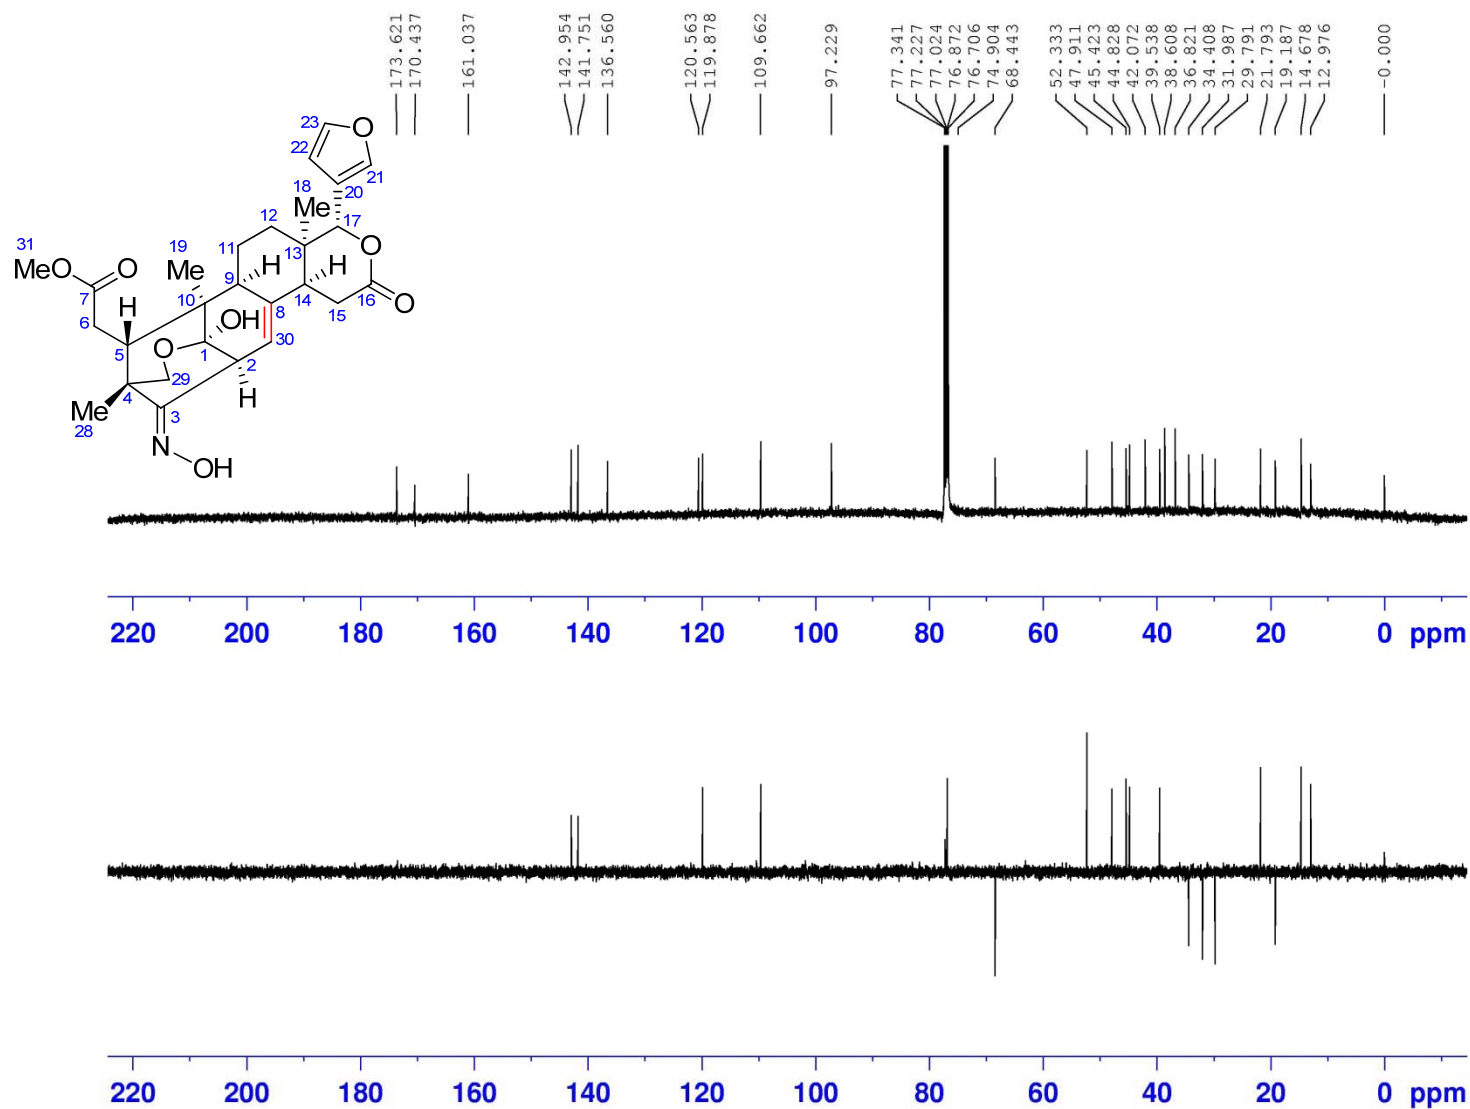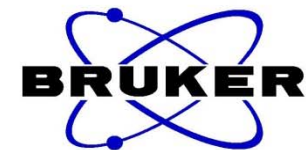

```

NAME      czc-1-ibx-CH3-yansuanq:
EXPNO      3
PROCNO     1
Date_      20171001
Time       22.24
INSTRUM    spect
PROBHD     5 mm CPPBBO BB
PULPROG    deptsp135
TD         65536
SOLVENT    CDCl3
NS         300
DS         4
SWH        24038.461 Hz
FIDRES     0.366798 Hz
AQ         1.3631988 sec
RG         130.26
DW         20.800 usec
DE         18.00 usec
TE         297.0 K
CNST2      145.0000000
D1         2.00000000 sec
D2         0.00344828 sec
D12        0.00002000 sec
TD0        1
  
```

```

===== CHANNEL f1 =====
SFO1      100.6233324 MHz
NUC1      13C
P1        10.00 usec
P13       2000.00 usec
SI        32768
SF        100.6127692 MHz
WDW       EM
SSB       0
LB        1.00 Hz
GB        0
PC        1.40
  
```

# DEPT 135 spectrum of **9a** in CDCl<sub>3</sub>

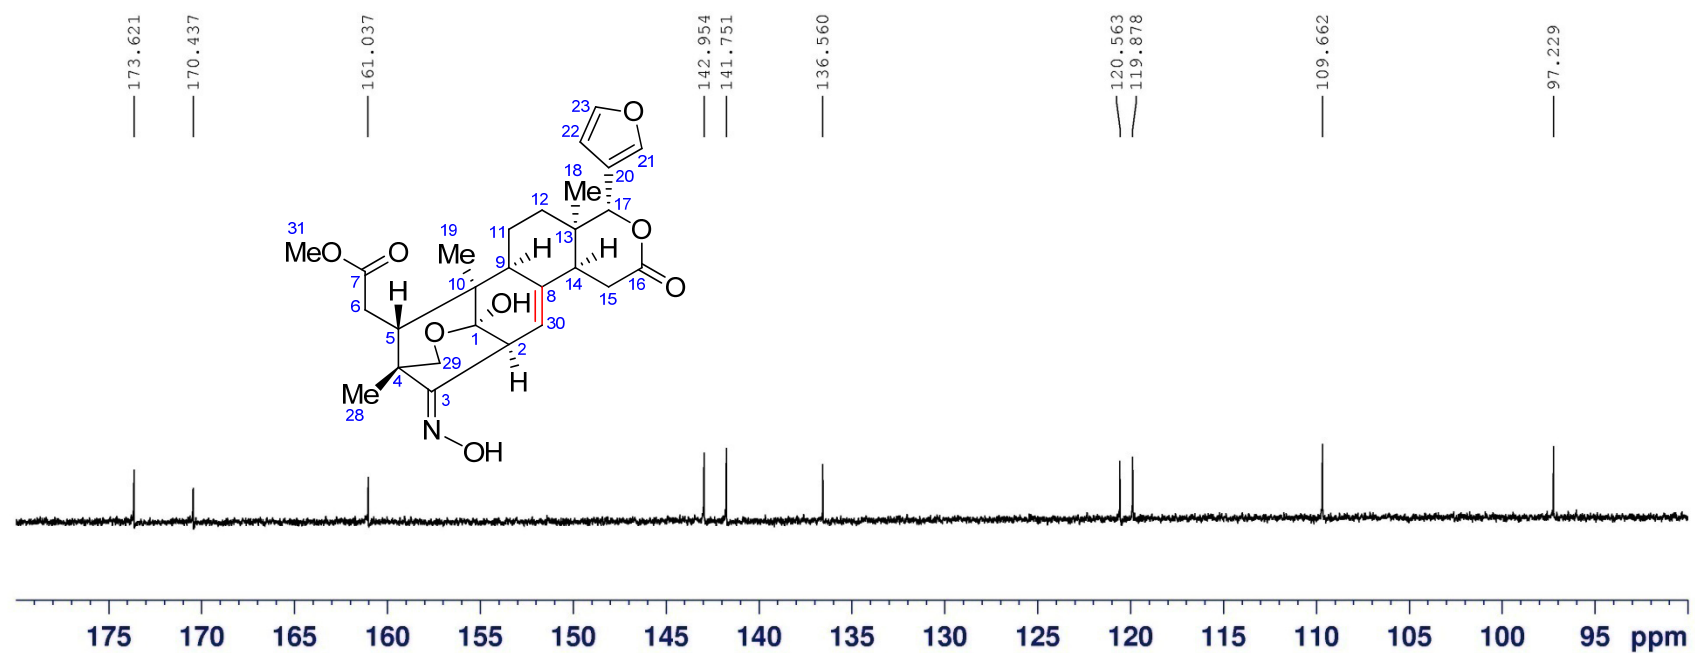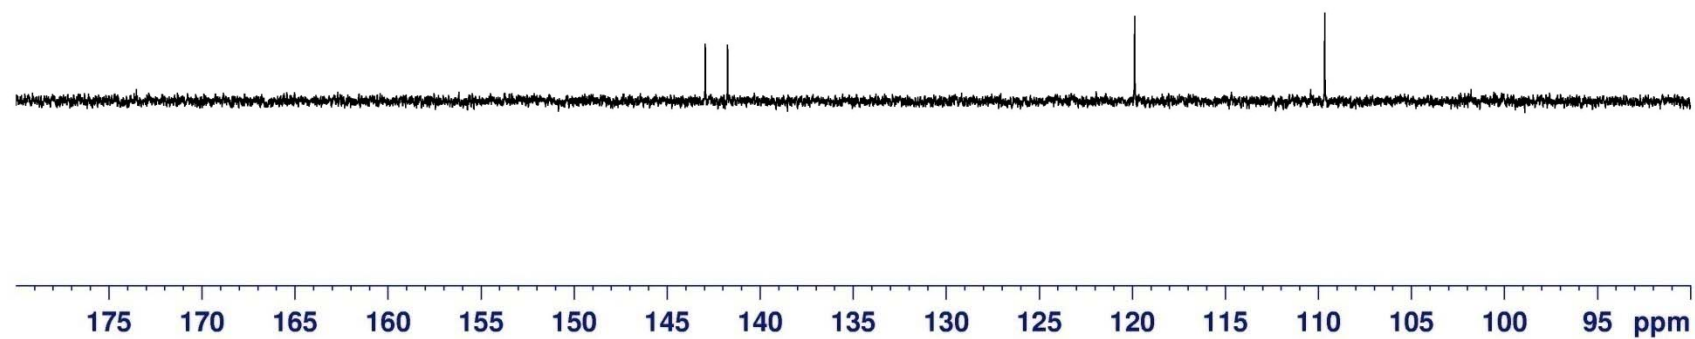

DEPT 135 spectrum of **9a** in CDCl<sub>3</sub>

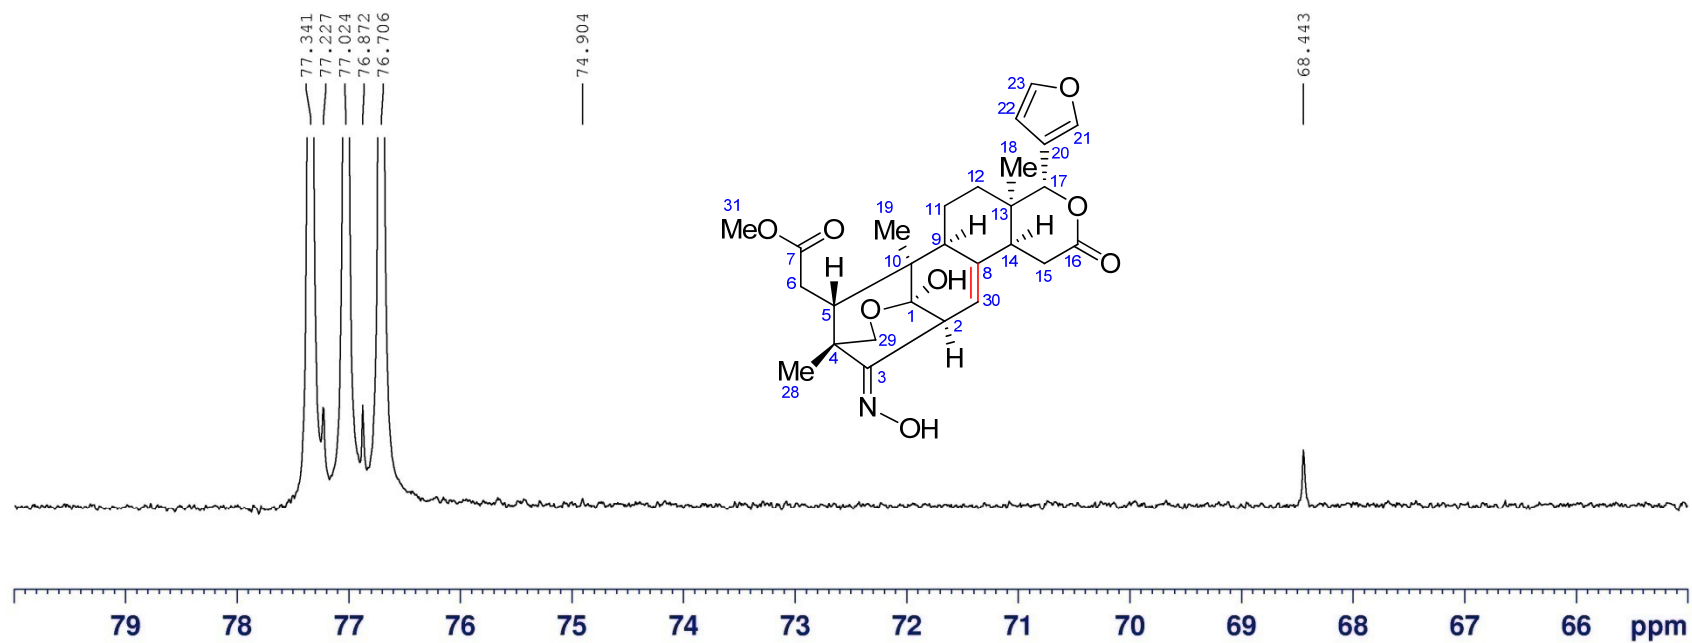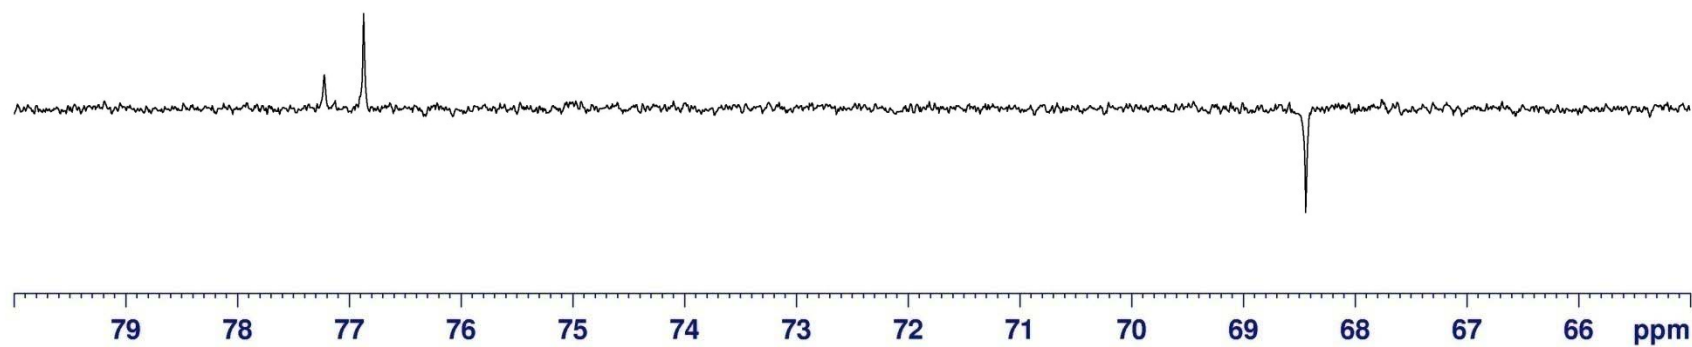

# DEPT 135 spectrum of **9a** in CDCl<sub>3</sub>

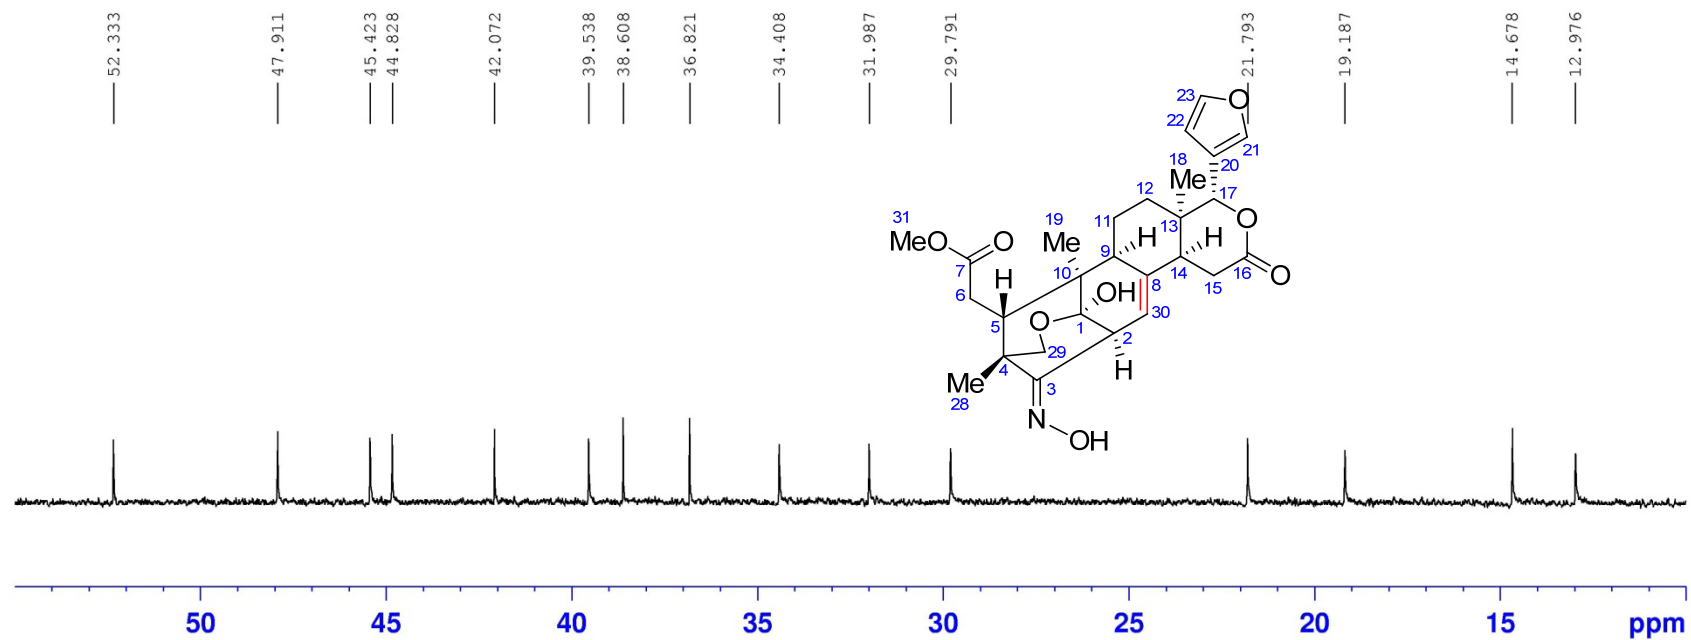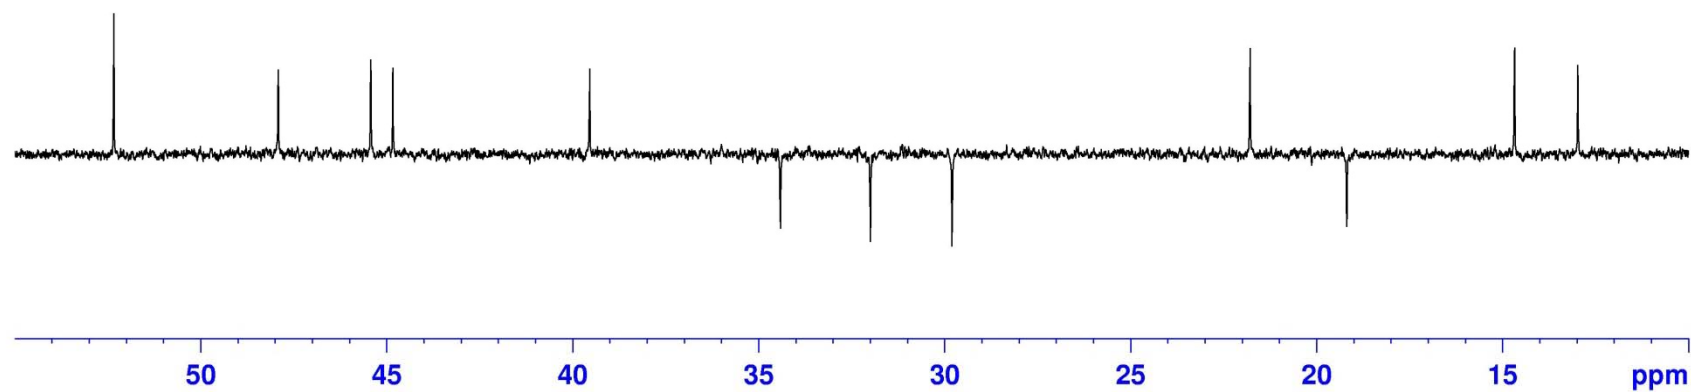

## LR-ESIMS for compound **9b**

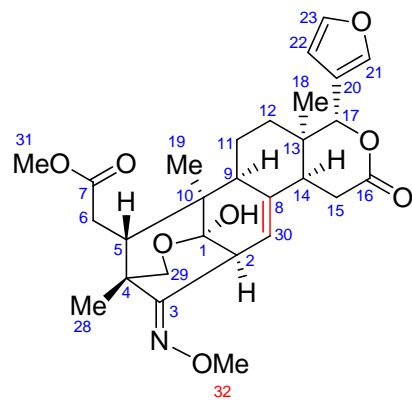

### Generic Display Report

#### Analysis Info

Analysis Name D:\MS\RJL\180915\67-2018-09-1520-55-30.D  
Method DEF\_LC.M  
Sample Name 67  
Comment

Acquisition D 2018/9/15 20:56:00

Operator  
Instrument LCMSD

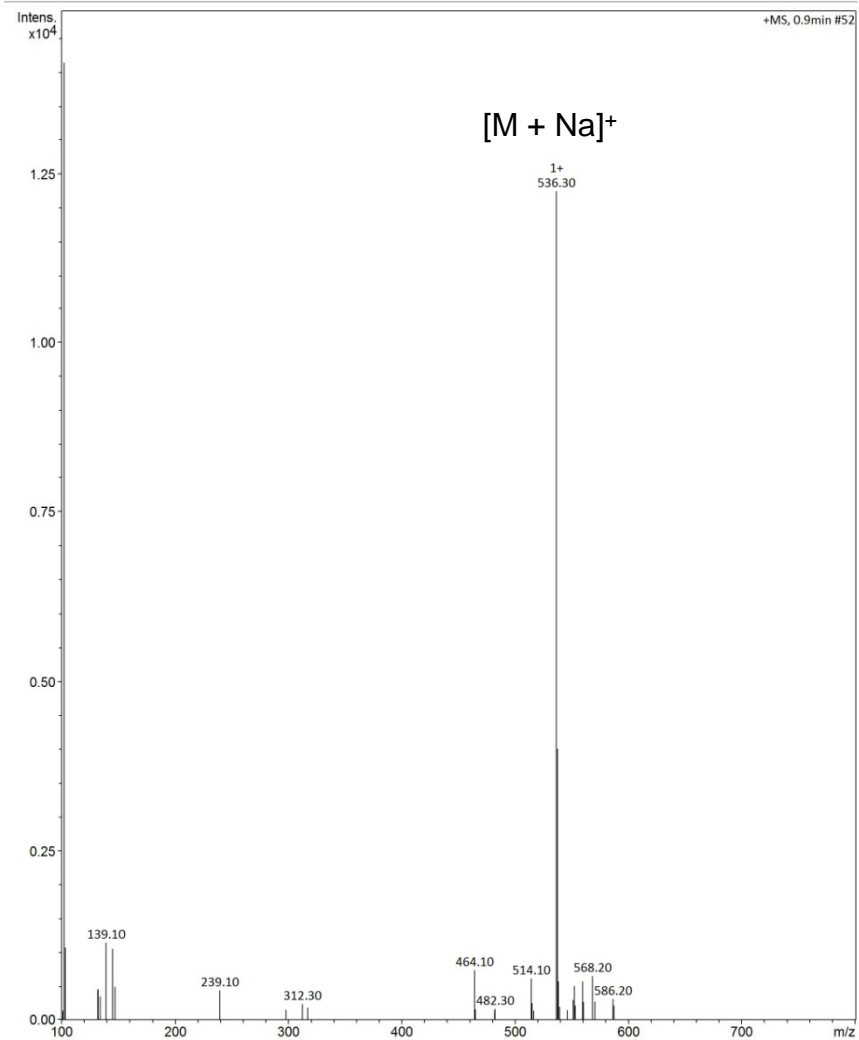

Bruker Compass DataAnalysis

$^1\text{H}$  NMR (400 MHz) spectrum of **9b** in  $\text{CDCl}_3$

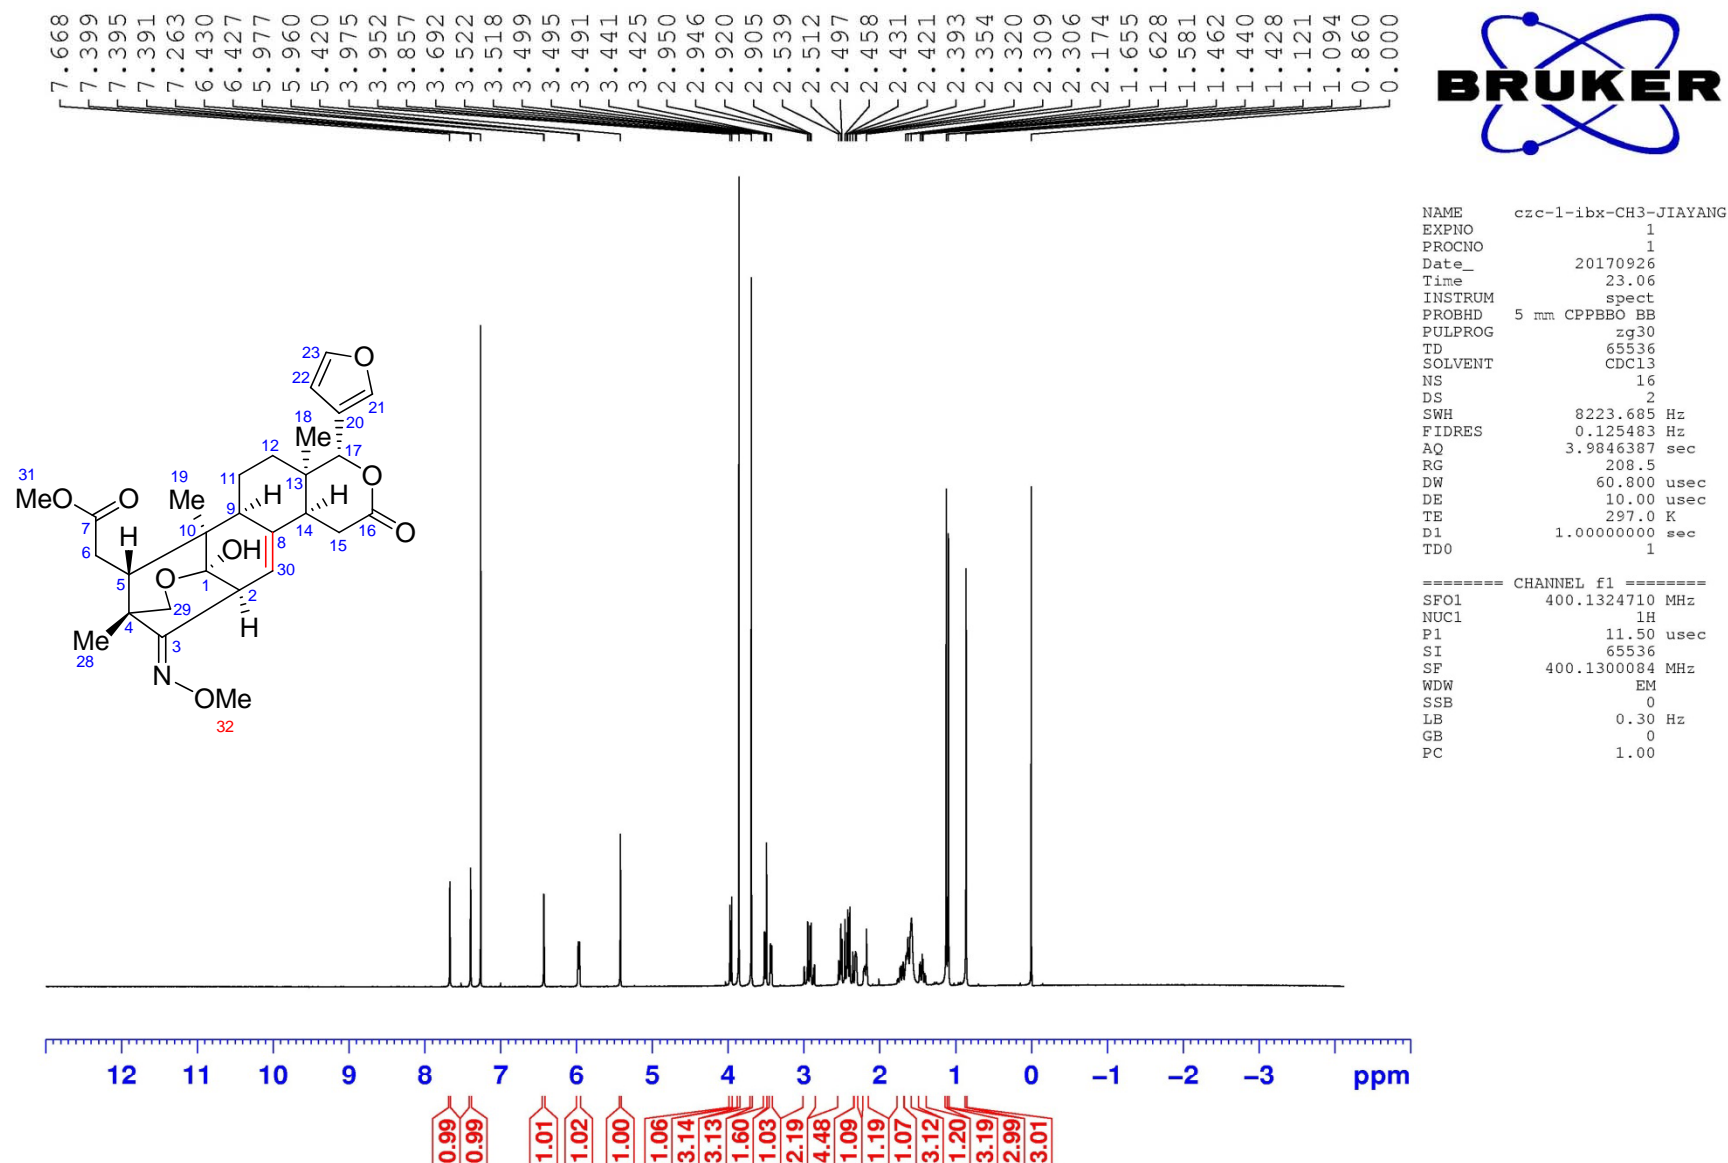

$^1\text{H}$  NMR (400 MHz) spectrum of **9b** in  $\text{CDCl}_3$

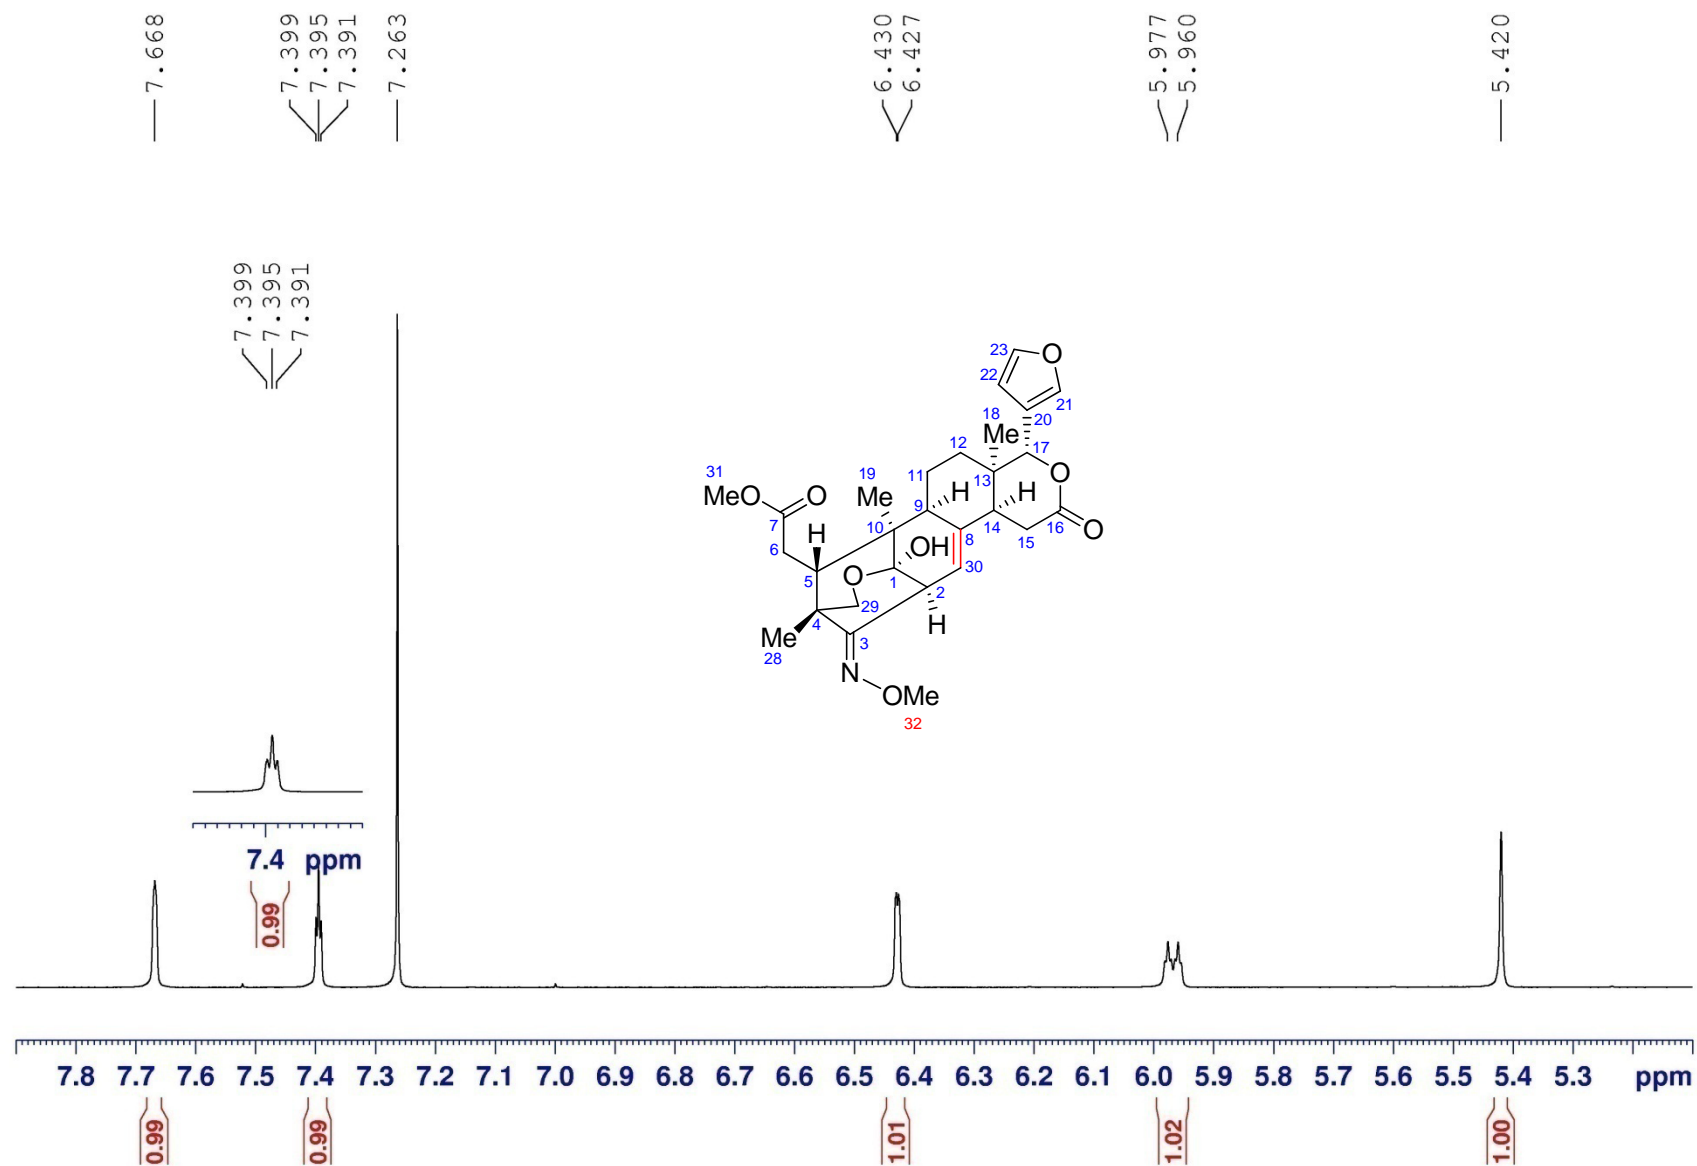



$^1\text{H}$  NMR (400 MHz) spectrum of **9b** in  $\text{CDCl}_3$

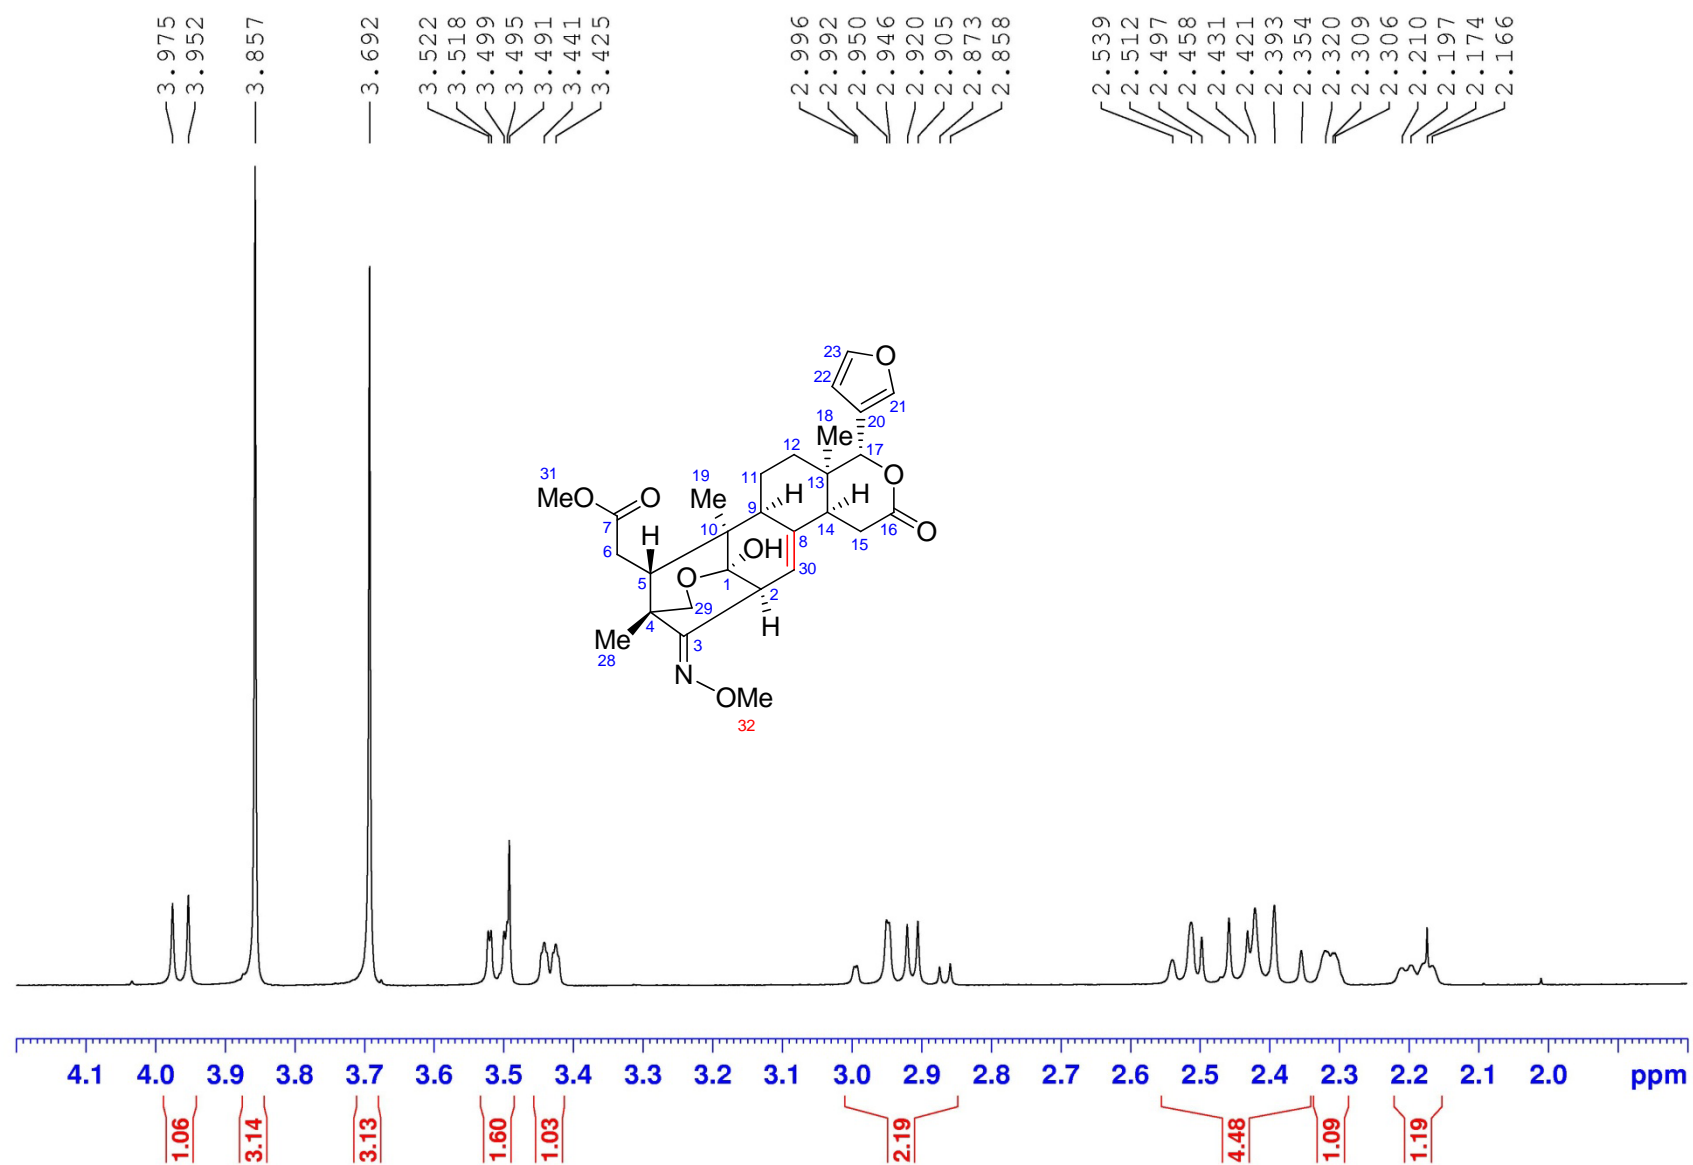

$^1\text{H}$  NMR (400 MHz) spectrum of **9b** in  $\text{CDCl}_3$

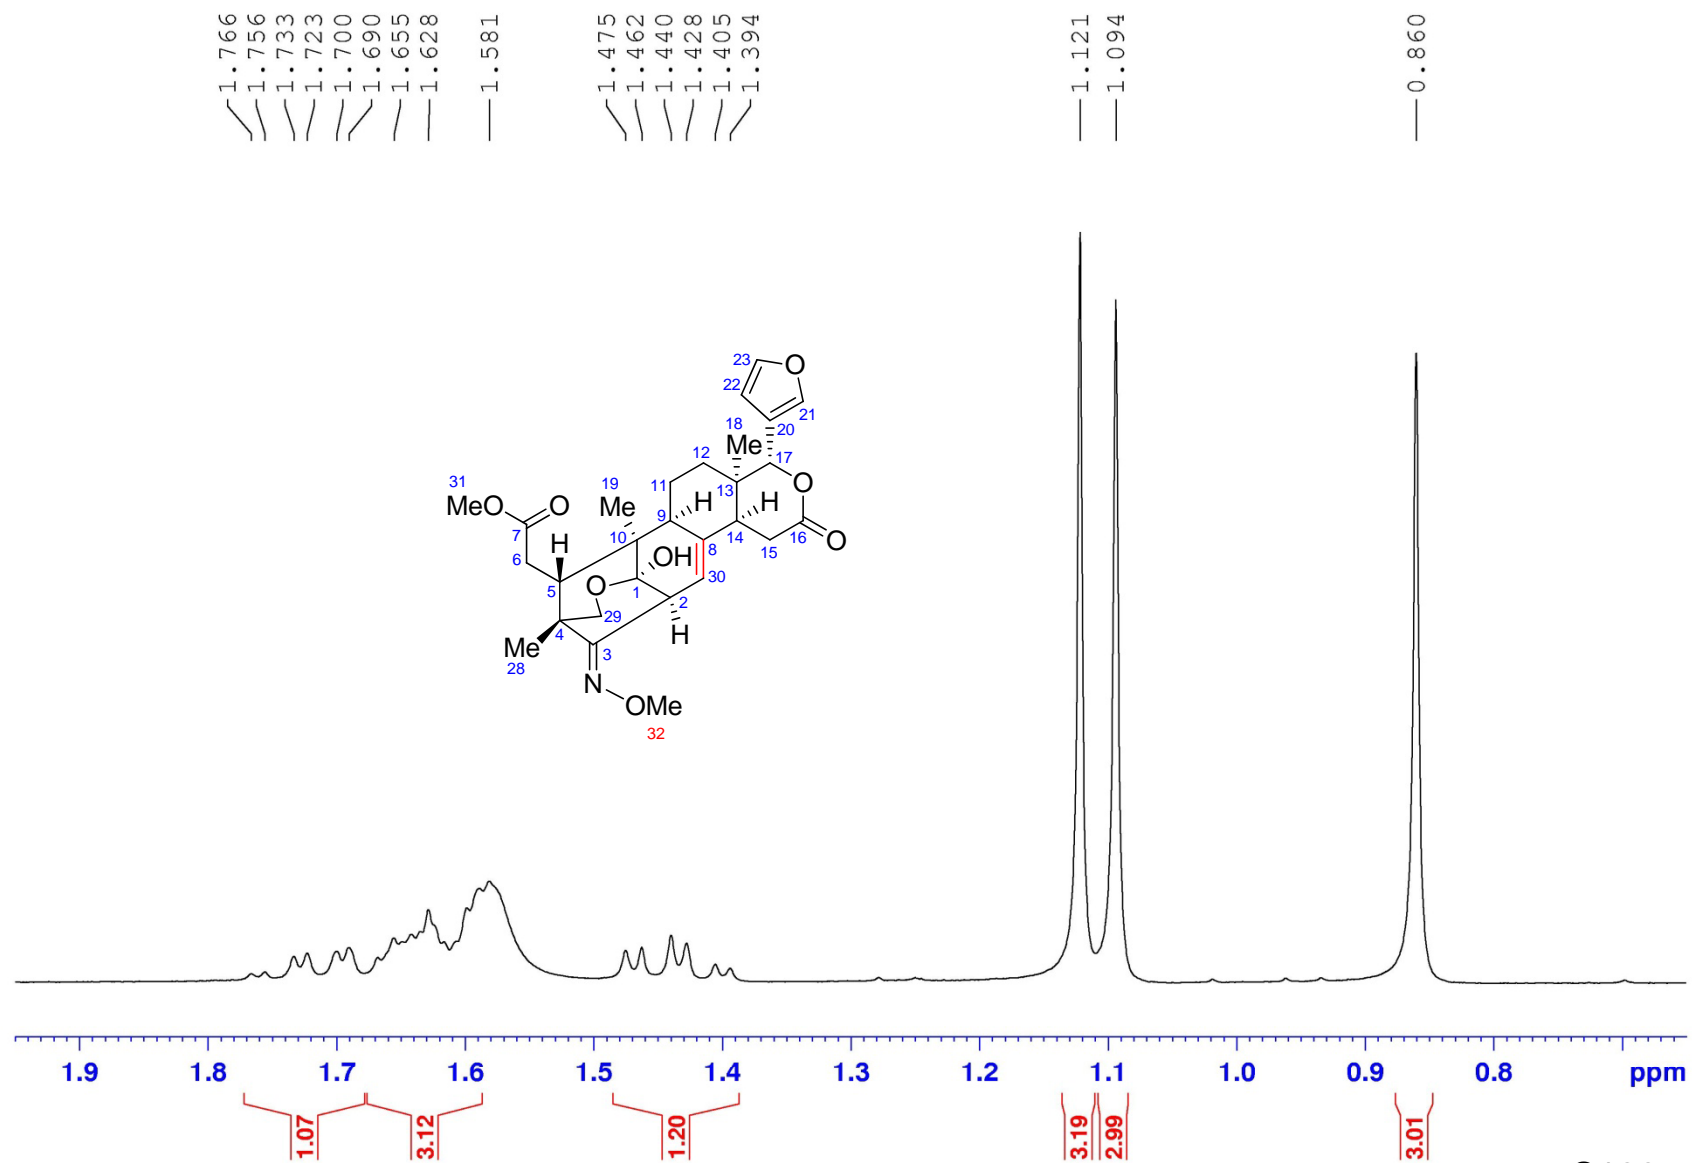

$^{13}\text{C}$  NMR (100 MHz) spectrum of **9b** in  $\text{CDCl}_3$

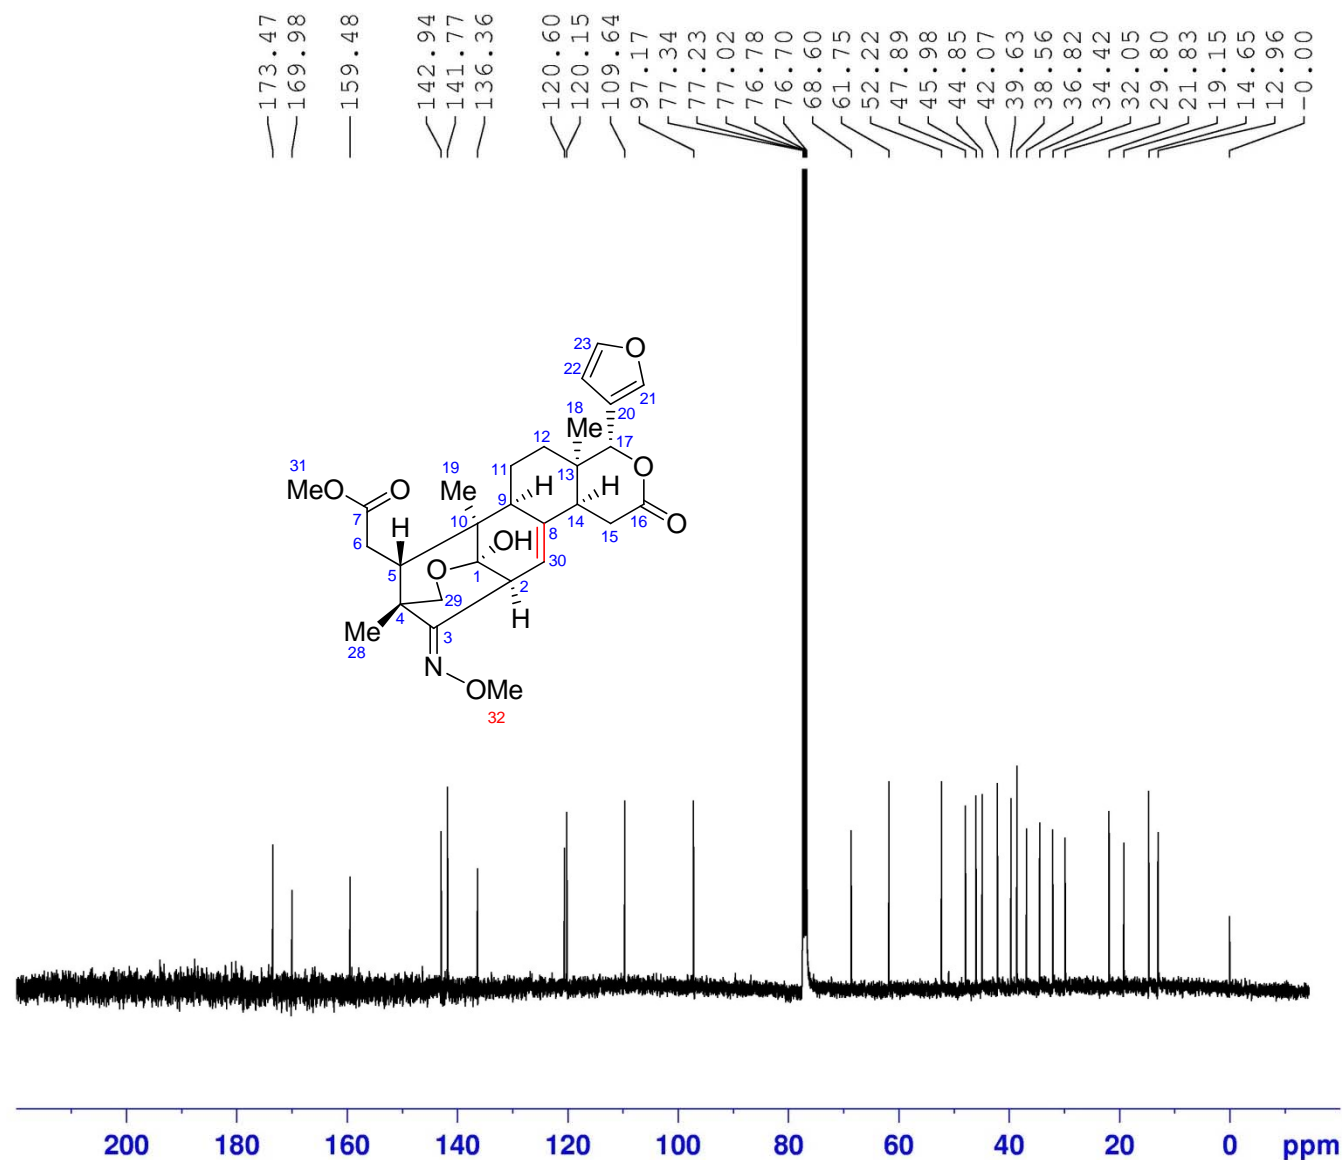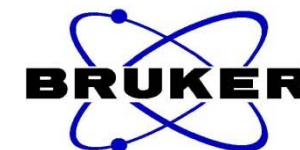

```

NAME      czc-1-ibx-CH3-JIAYANG
EXPNO     2
PROCNO    1
Date_     20170927
Time      8.39
INSTRUM   spect
PROBHD    5 mm CPPBBO BB
PULPROG   zgpg30
TD        65536
SOLVENT   CDC13
NS        1024
DS        4
SWH       24038.461 Hz
FIDRES    0.366798 Hz
AQ        1.3631988 sec
RG        117.37
DW        20.800 usec
DE        18.00 usec
TE        297.0 K
D1        2.00000000 sec
D11       0.03000000 sec
TD0       1
    
```

```

===== CHANNEL f1 =====
SFO1    100.6233324 MHz
NUC1    13C
P1      10.00 usec
SI      32768
SF      100.6127690 MHz
WDW     EM
SSB     0
LB      1.00 Hz
GB      0
PC      1.40
    
```

$^{13}\text{C}$  NMR (100 MHz) spectrum of **9b** in  $\text{CDCl}_3$

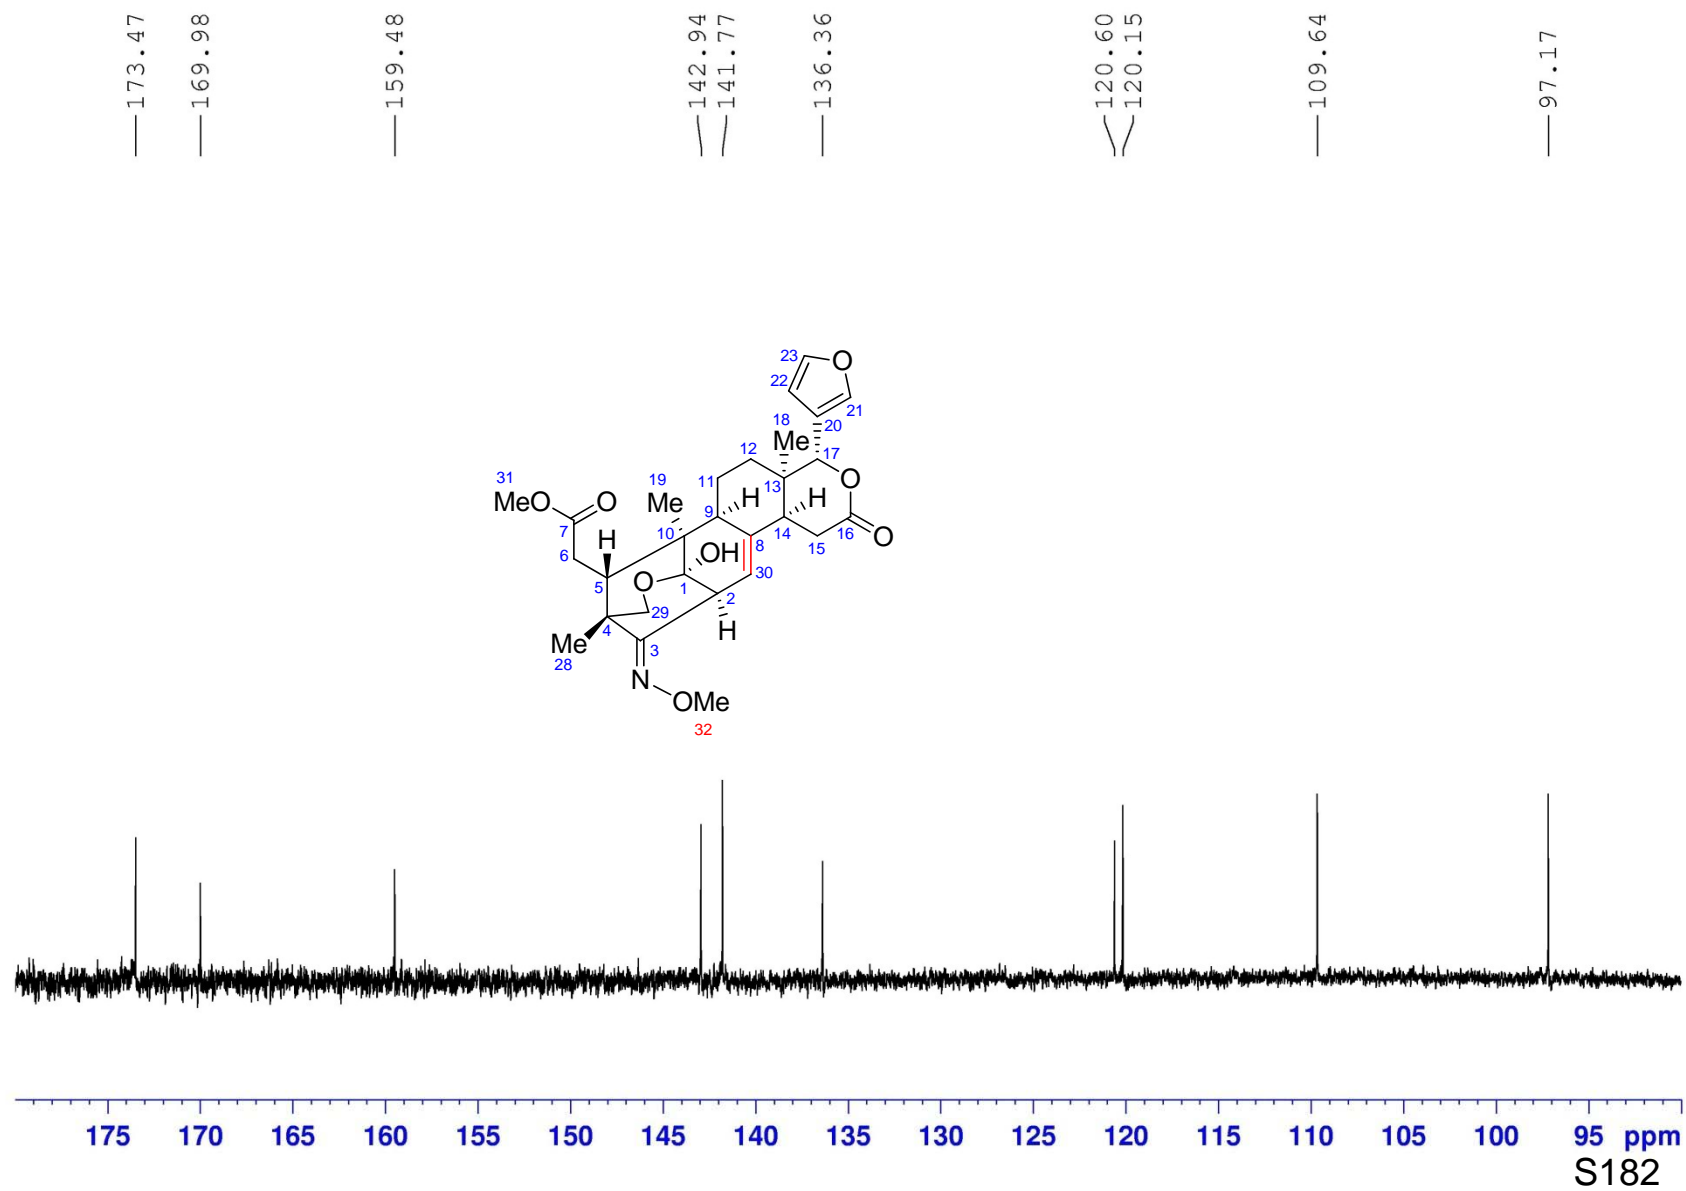

$^{13}\text{C}$  NMR (100 MHz) spectrum of **9b** in  $\text{CDCl}_3$

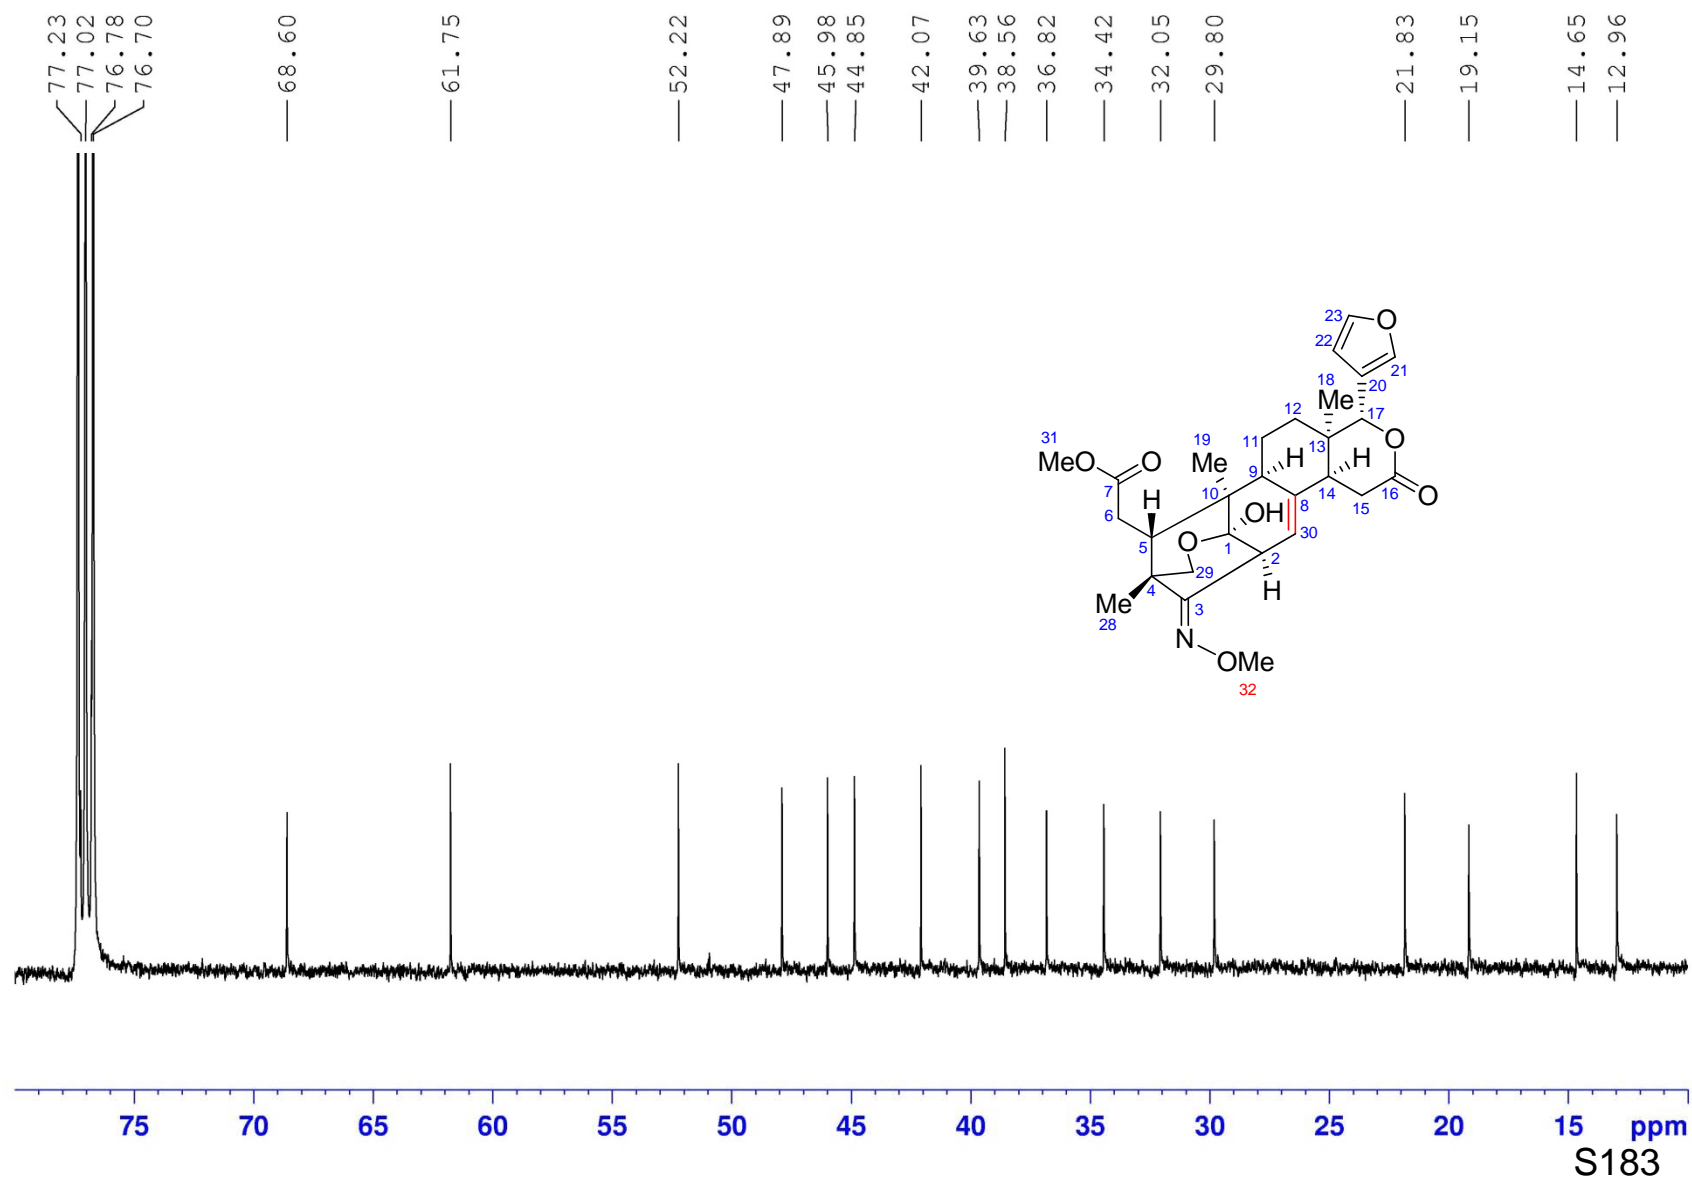

# DEPT 135 spectrum of **9b** in CDCl<sub>3</sub>

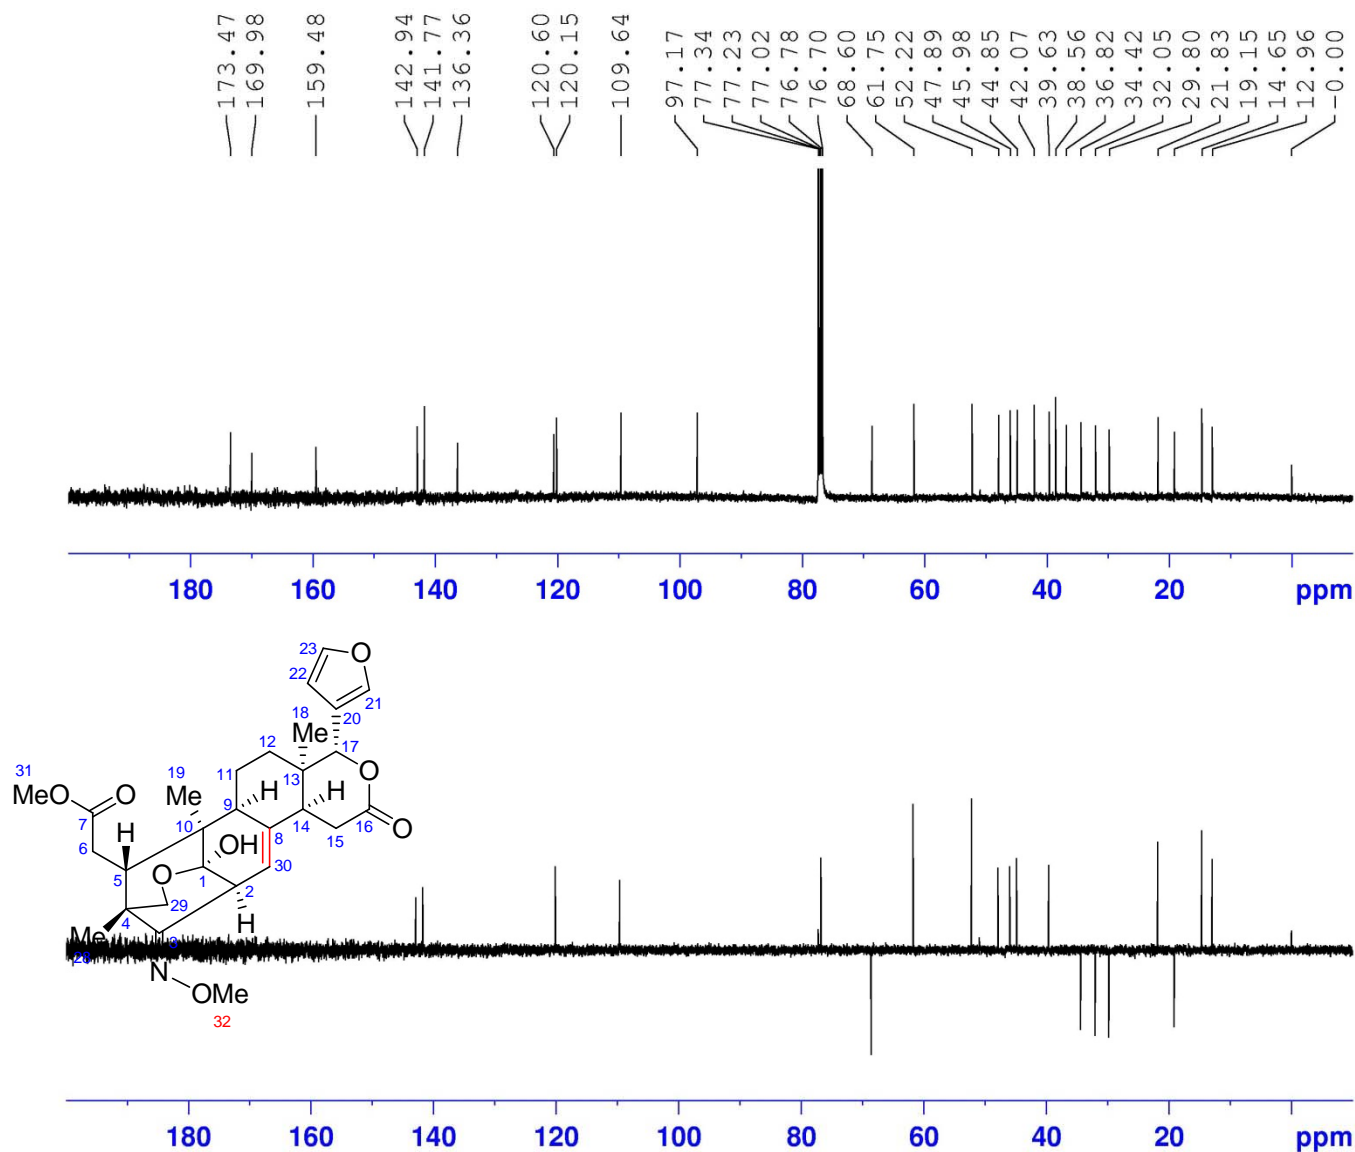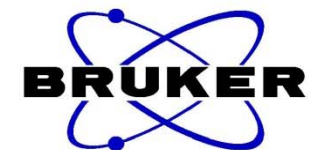

```

NAME      czc-1-ibx-CH3-JIAYANG
EXPNO      2
PROCNO     1
Date_      20170927
Time       8.39
INSTRUM    spect
PROBHD     5 mm CPPBBO BB
PULPROG    zgpg30
TD         65536
SOLVENT    CDCl3
NS         1024
DS         4
SWH        24038.461 Hz
FIDRES     0.366798 Hz
AQ         1.3631988 sec
RG         117.37
DW         20.800 usec
DE         18.00 usec
TE         297.0 K
D1         2.00000000 sec
D11        0.03000000 sec
TD0        1
    
```

```

===== CHANNEL f1 =====
SF01      100.6233324 MHz
NUC1      13C
P1        10.00 usec
SI        32768
SF        100.6127690 MHz
WDW       EM
SSB       0
LB        1.00 Hz
GB        0
PC        1.40
    
```

# DEPT 135 spectrum of **9b** in CDCl<sub>3</sub>

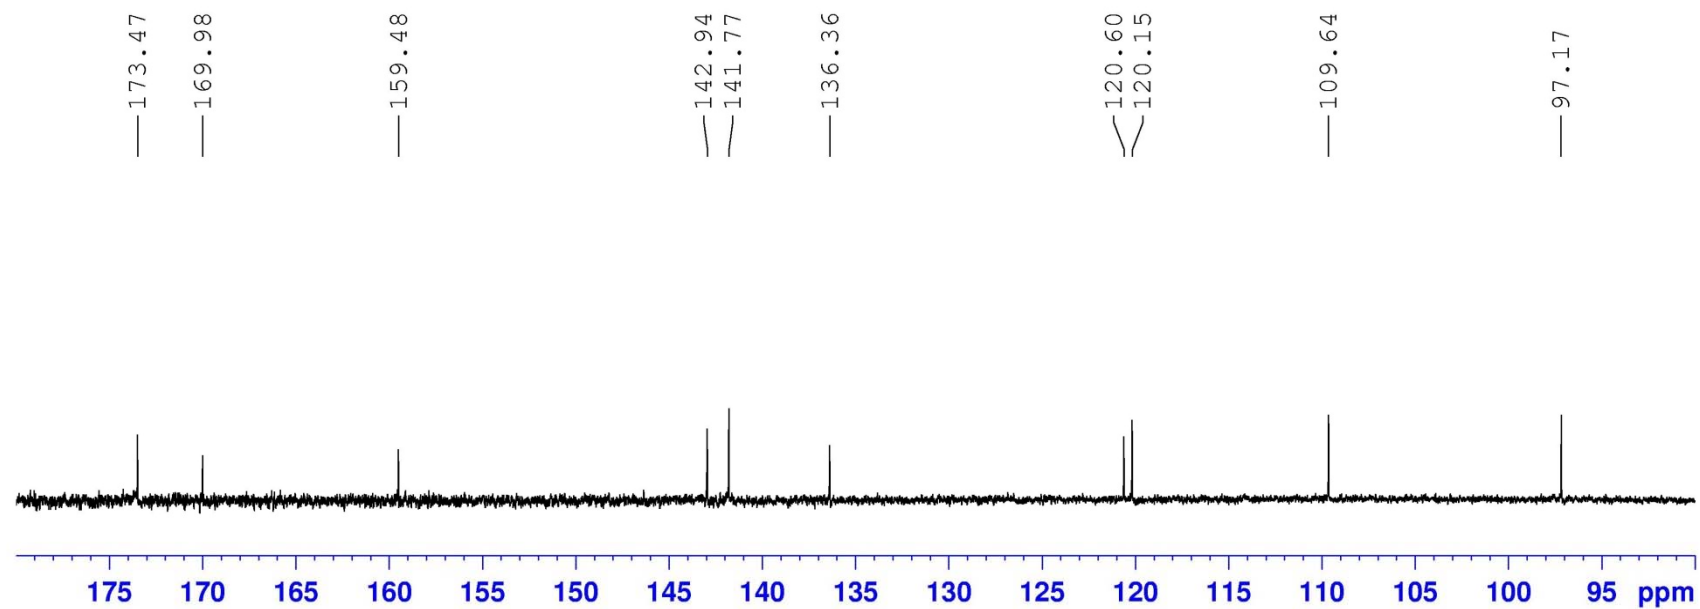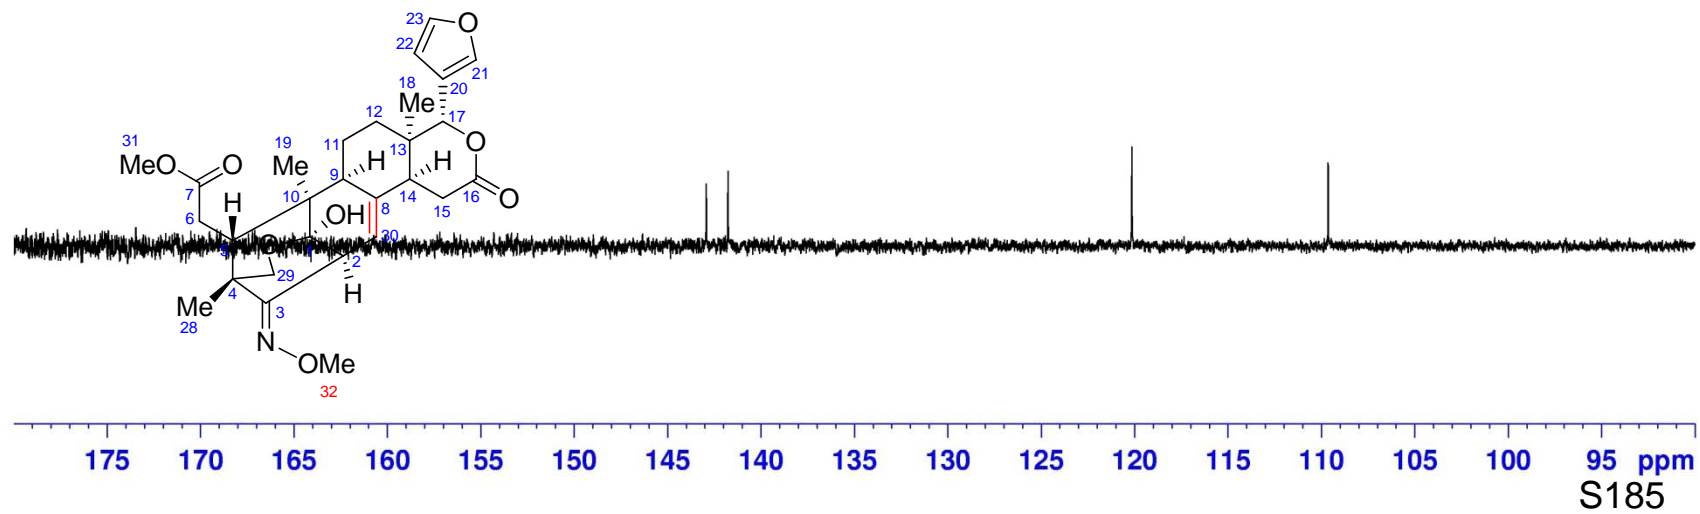

DEPT 135 spectrum of **9b** in CDCl<sub>3</sub>

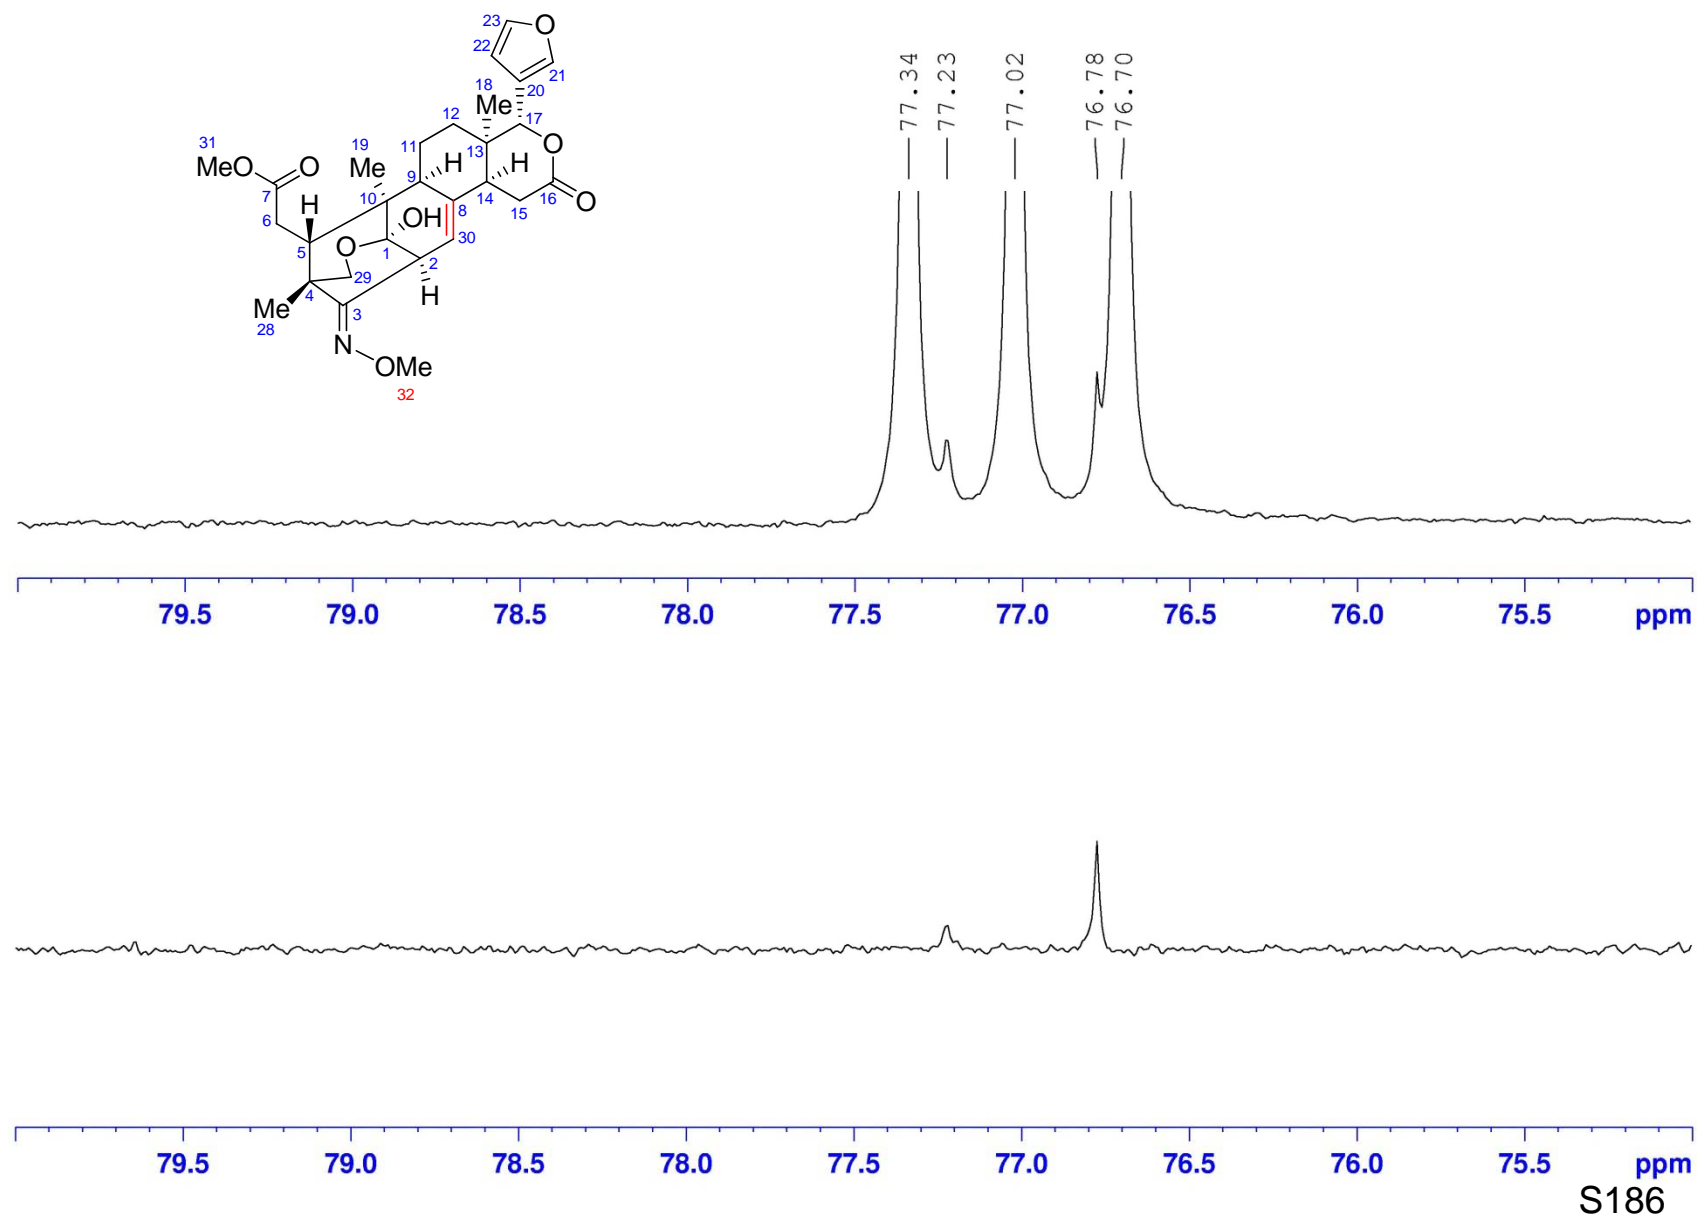



# DEPT 135 spectrum of **9b** in CDCl<sub>3</sub>

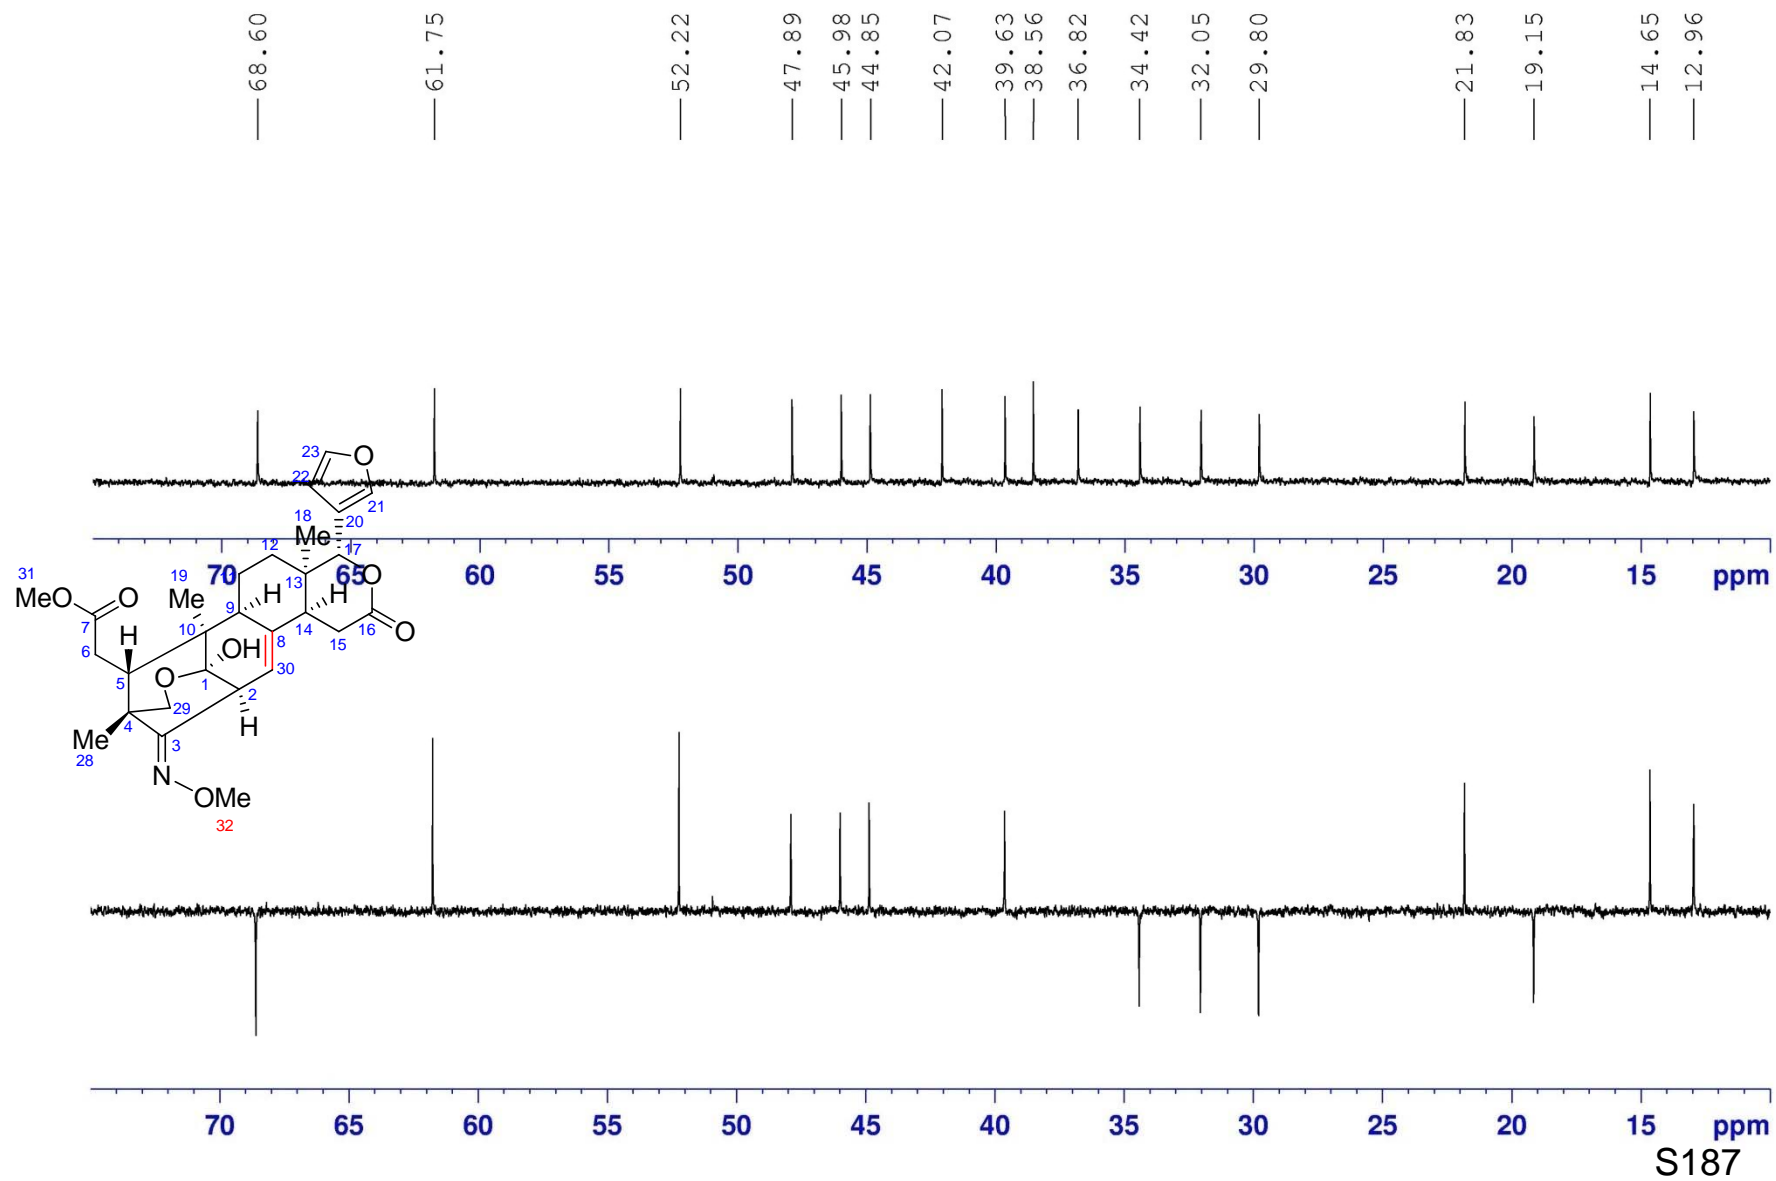

# LR-ESIMS for compound **10**

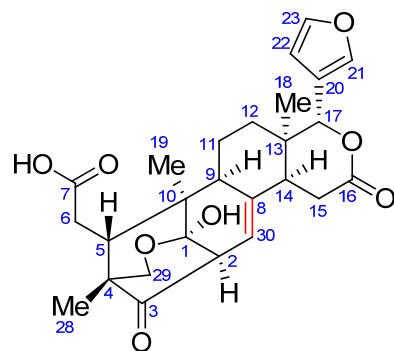

## Generic Display Report

### Analysis Info

Analysis Name H:\9.30\65\_RA1\_01\_1514.d

Method lc-7.9

Sample Name 69140922-alternating-500-50-2200-MS2\_1514.m

Comment

Acquisition D 2018/9/21 12:07:40

Operator bruker

Instrument amaZon SL

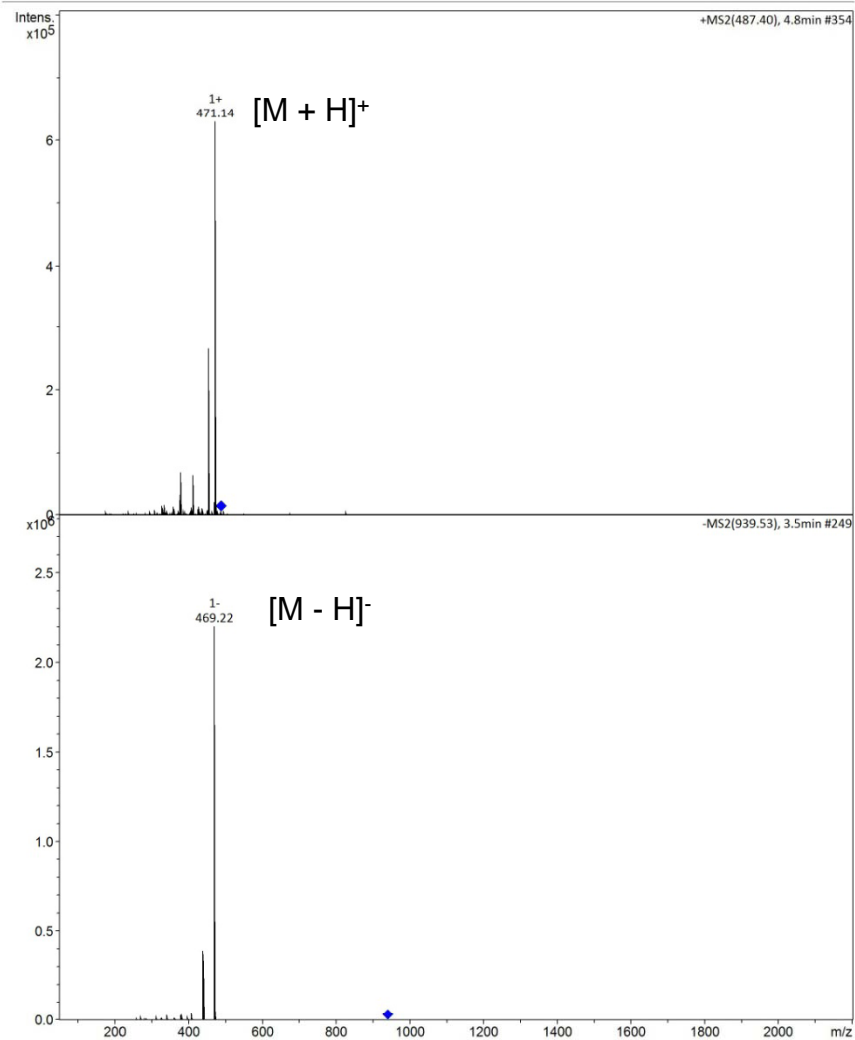

Bruker Compass DataAnalysis

S188

# <sup>1</sup>H NMR (400 MHz) spectrum of **10** in (CD<sub>3</sub>)<sub>2</sub>CO

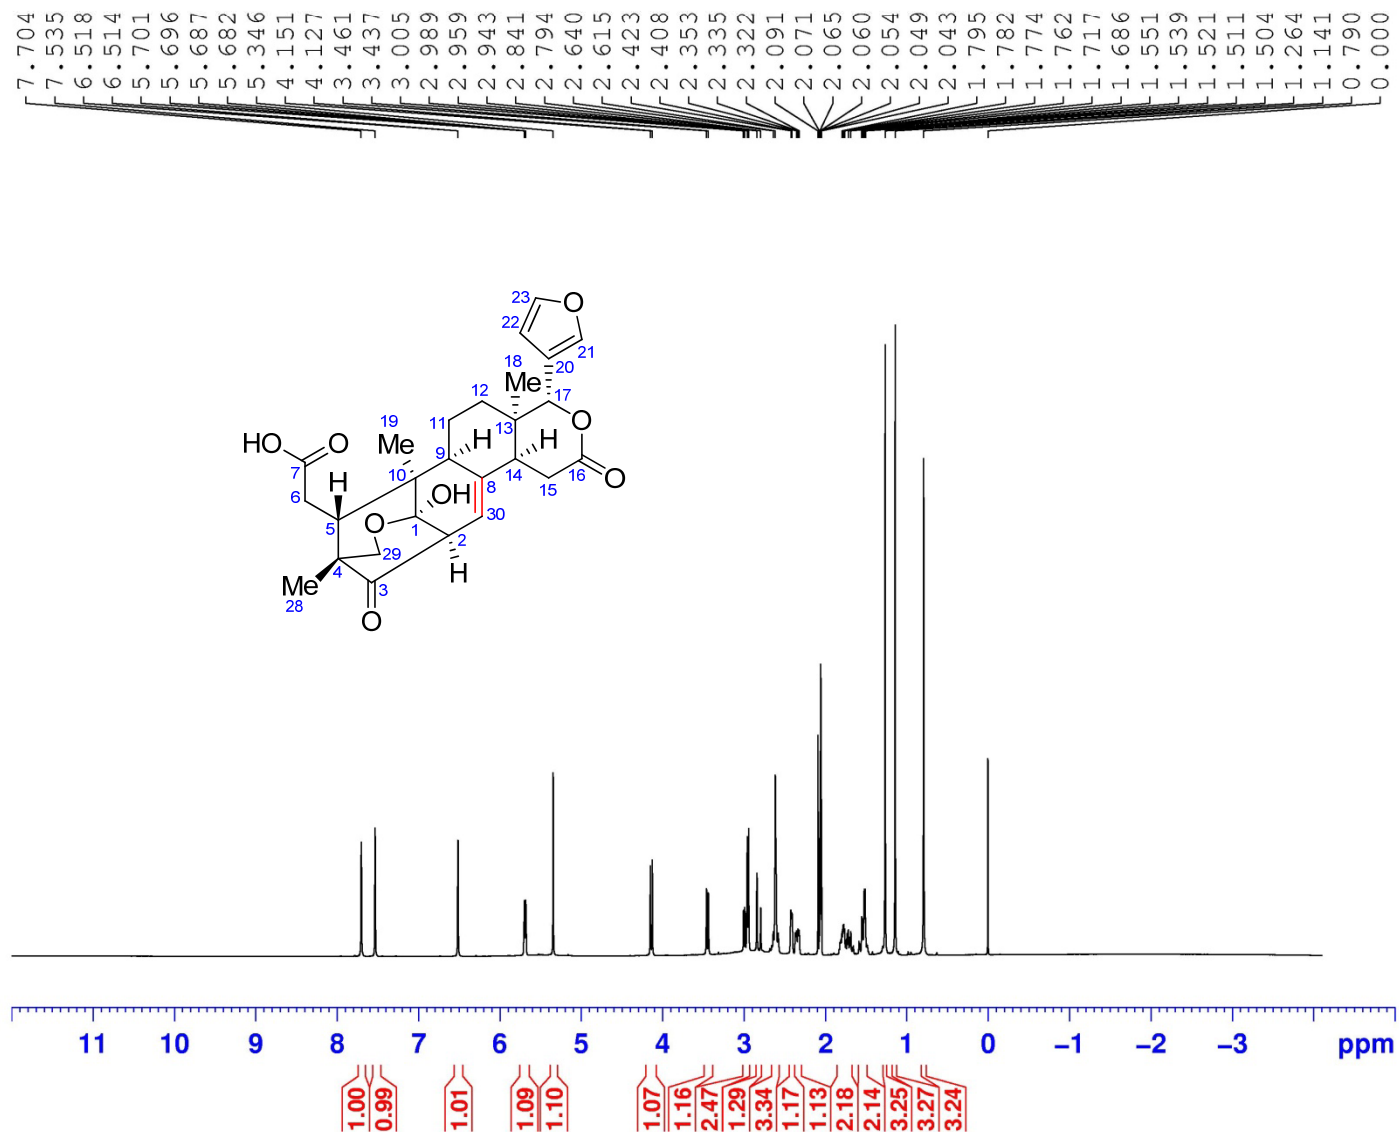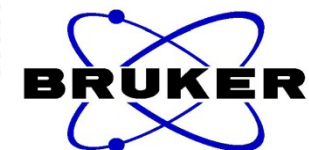

```

NAME      CZC-1-IBX-2
EXPNO     1
PROCNO    1
Date_     20170710
Time      15.10
INSTRUM   spect
PROBHD    5 mm CFPBBO BB
PULPROG   zg30
TD        65536
SOLVENT   Acetone
NS        16
DS        2
SWH       8223.685 Hz
FIDRES    0.125483 Hz
AQ        3.9846387 sec
RG        147.94
DW        60.800 usec
DE        10.00 usec
TE        297.0 K
D1        1.00000000 sec
TD0       1

===== CHANNEL f1 =====
SFO1      400.1324710 MHz
NUC1      1H
P1        11.50 usec
SI        65536
SF        400.1300051 MHz
WDW       EM
SSB       0
LB        0.30 Hz
GB        0
PC        1.00
    
```

$^1\text{H}$  NMR (400 MHz) spectrum of **10** in  $(\text{CD}_3)_2\text{CO}$

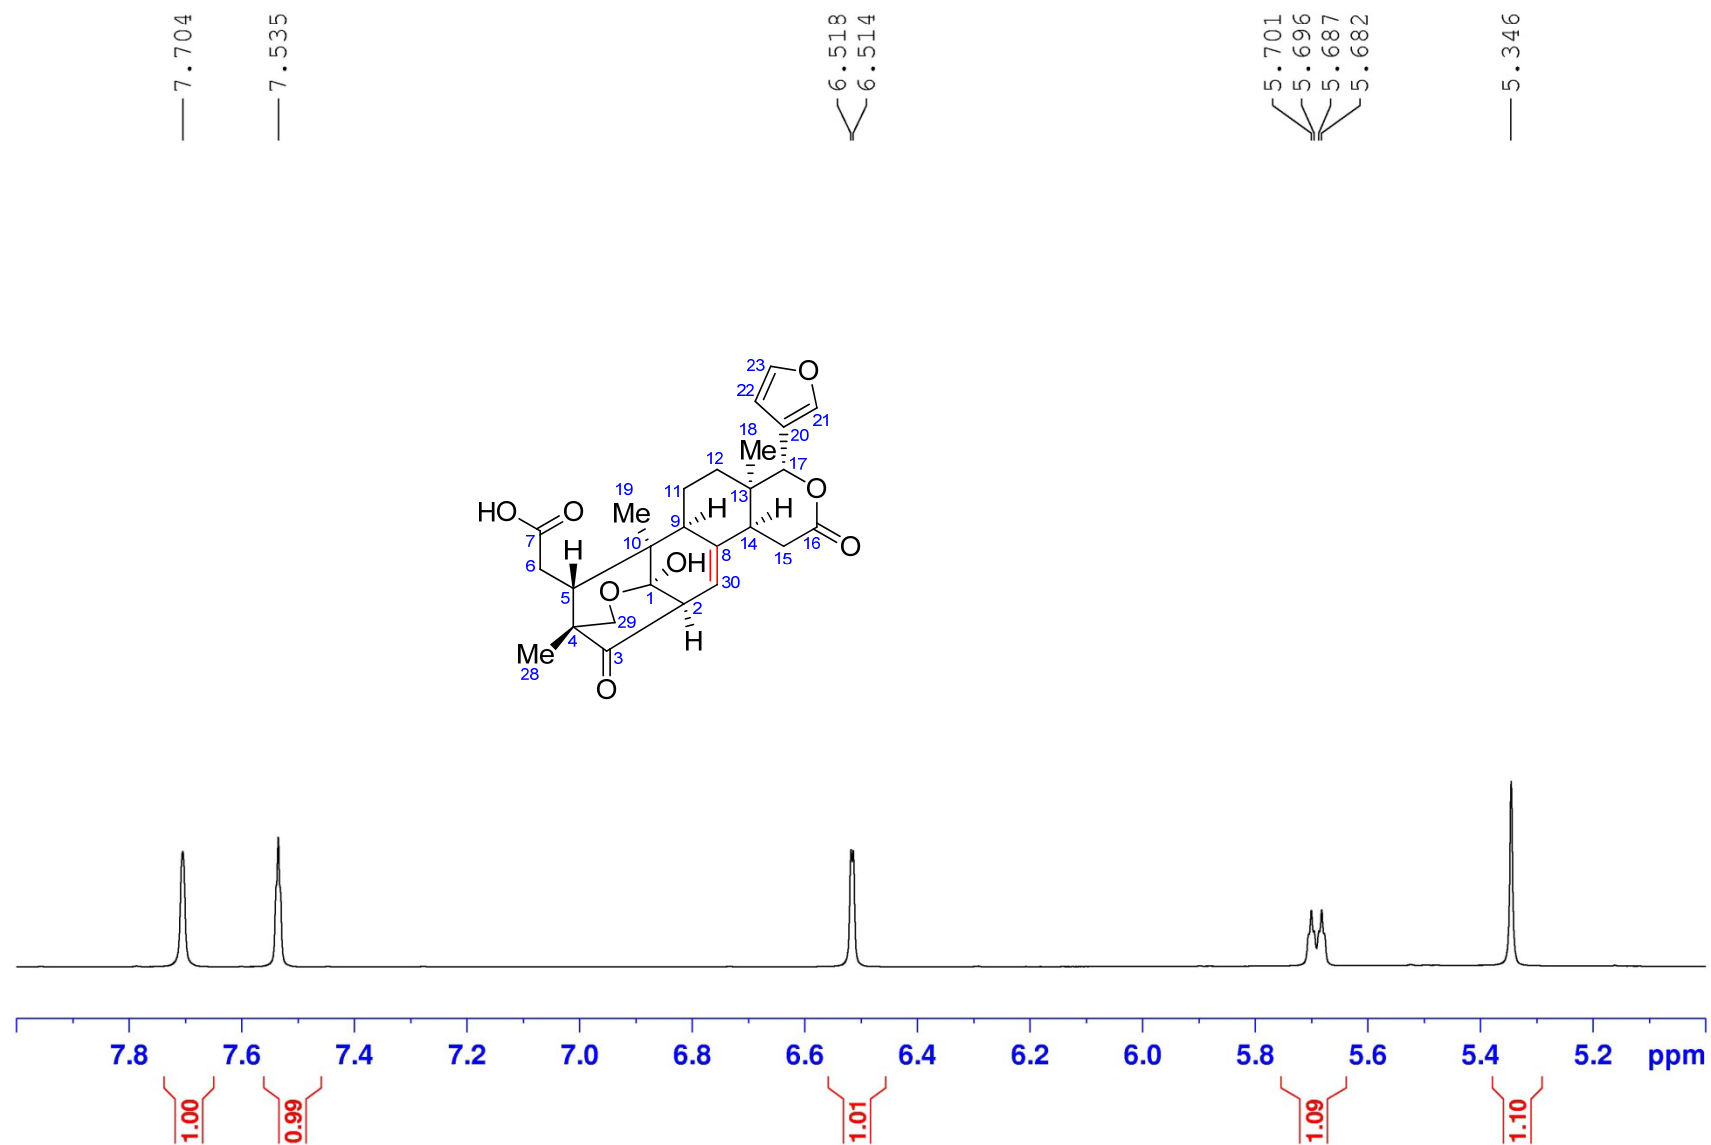

$^1\text{H}$  NMR (400 MHz) spectrum of **10** in  $(\text{CD}_3)_2\text{CO}$

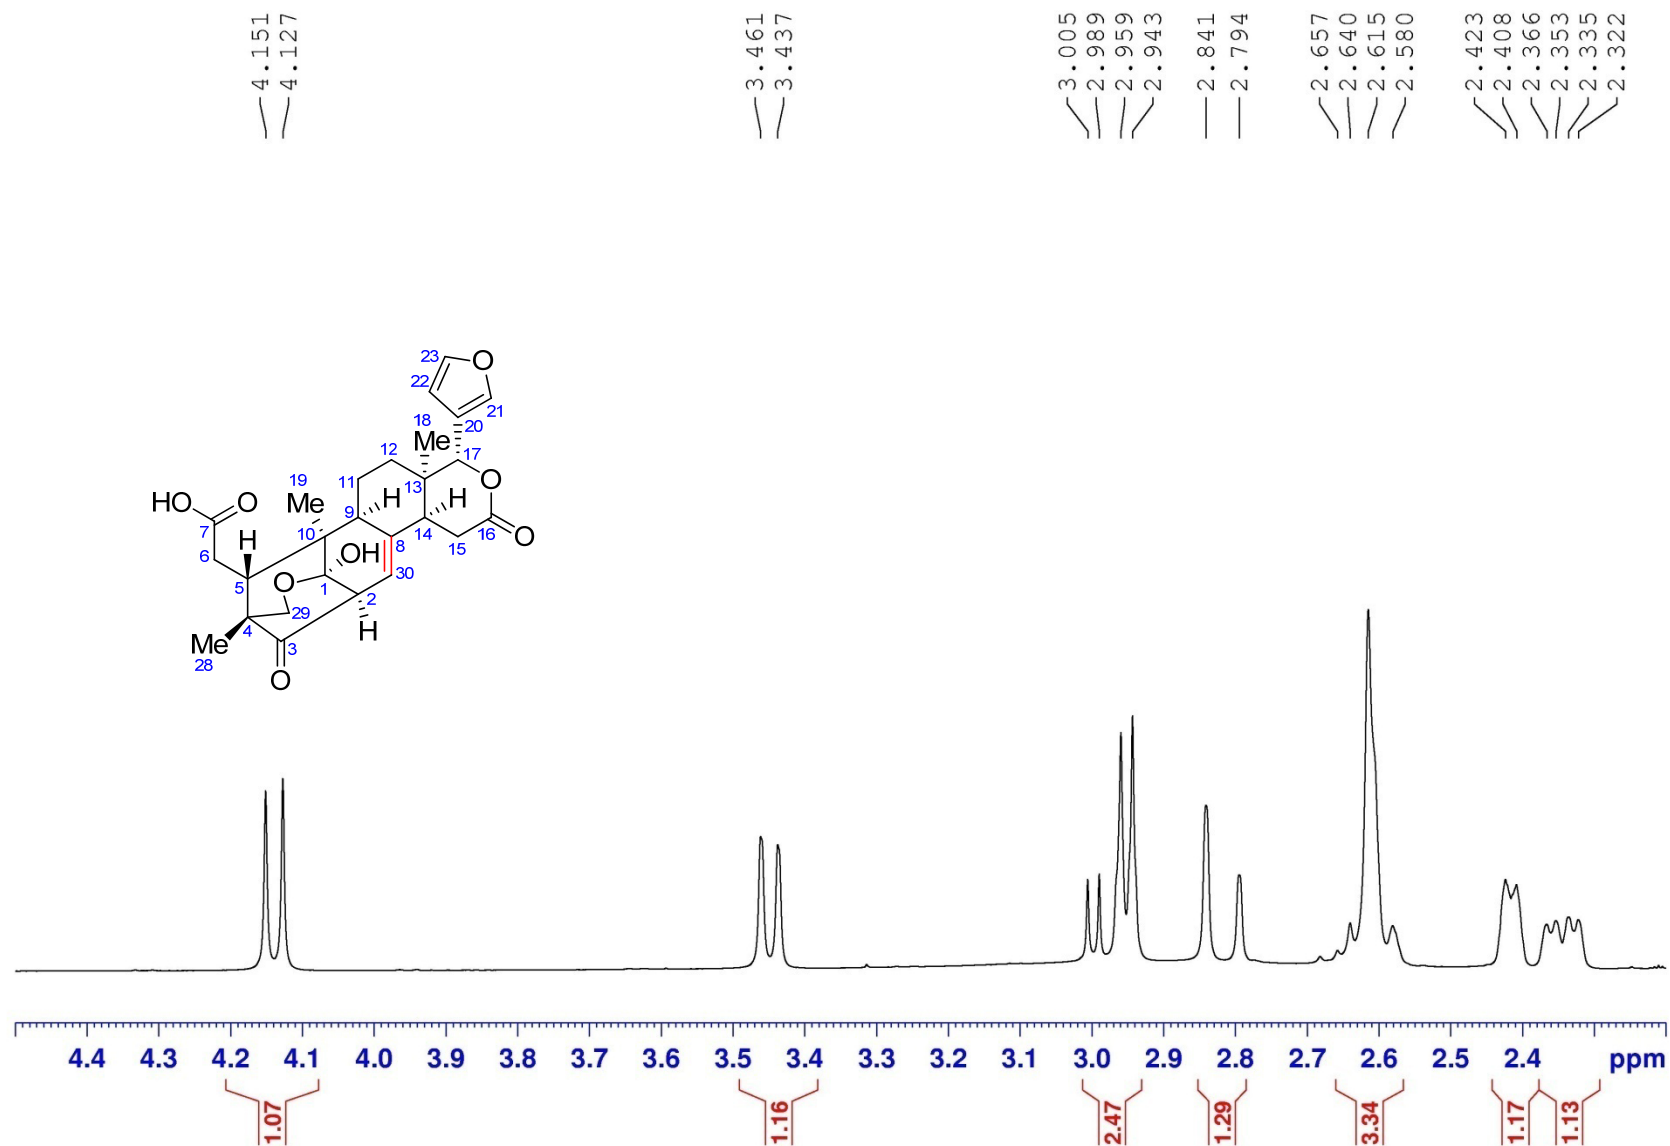

S191

$^1\text{H}$  NMR (400 MHz) spectrum of **10** in  $(\text{CD}_3)_2\text{CO}$

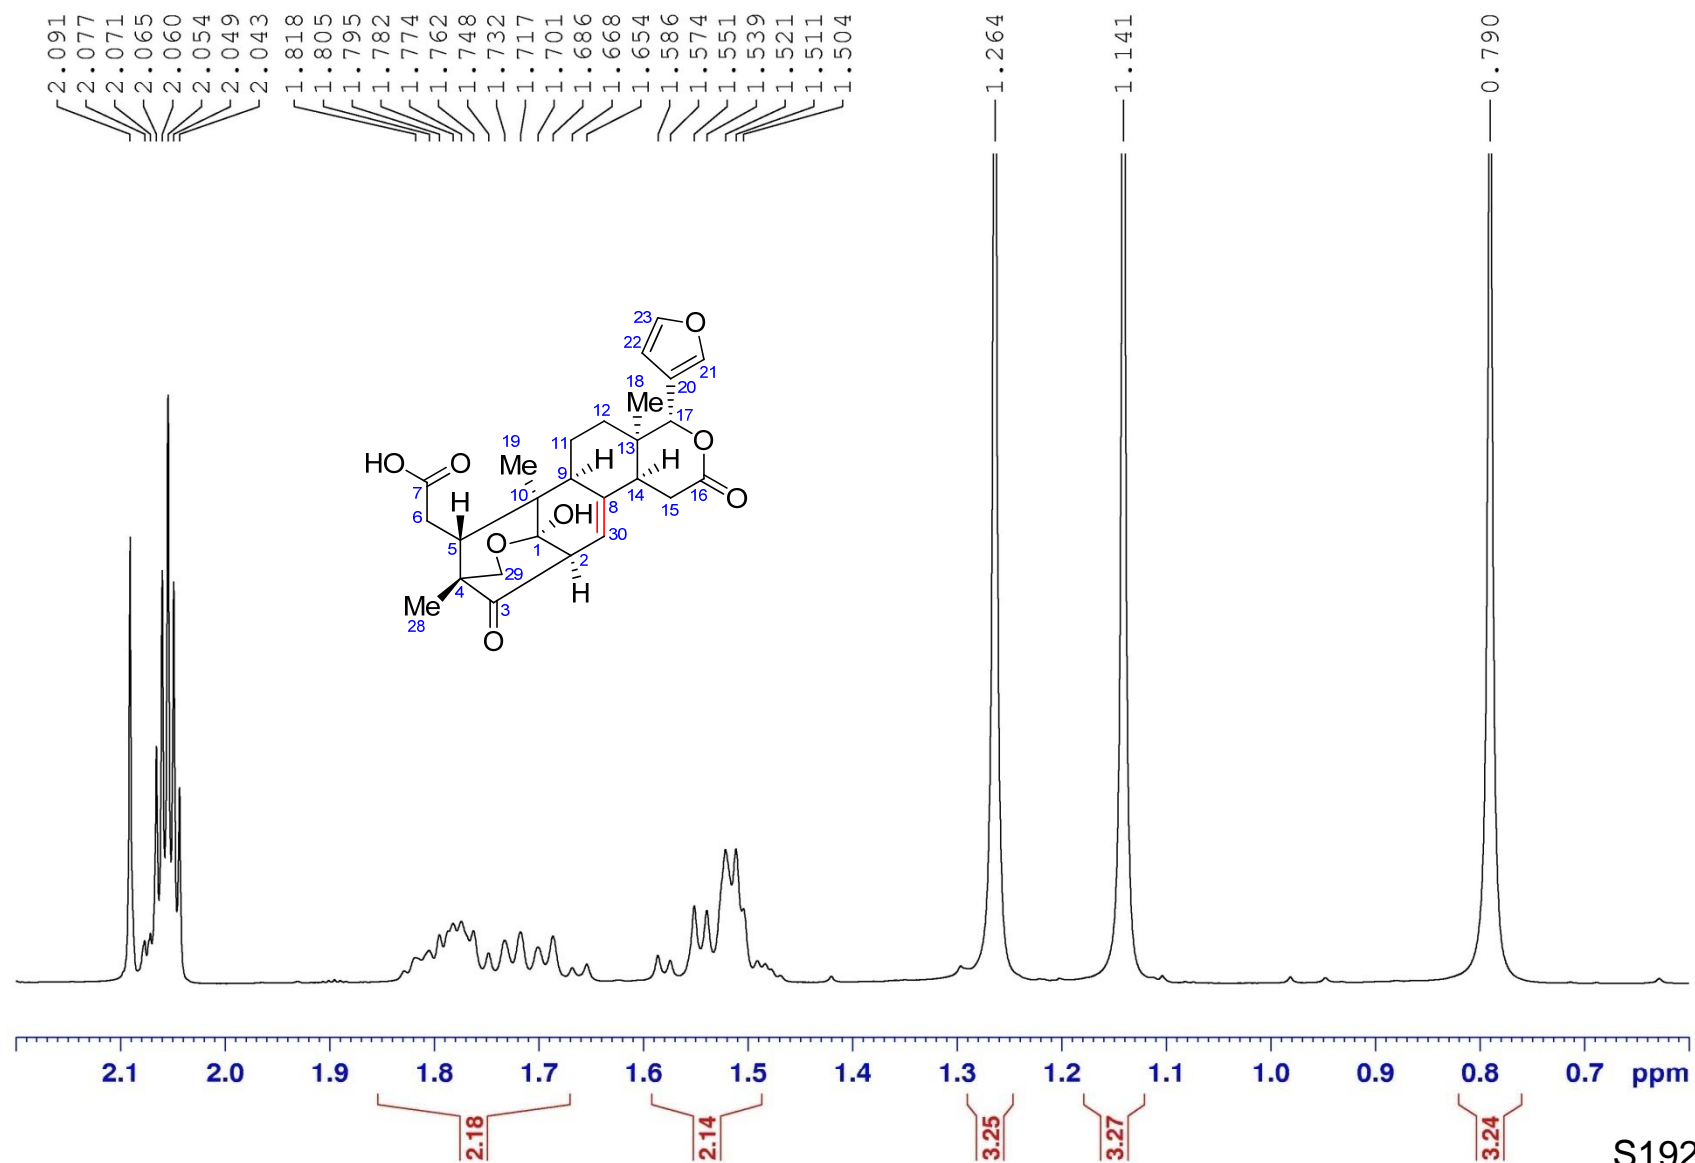

$^{13}\text{C}$  NMR (100 MHz) spectrum of **10** in  $(\text{CD}_3)_2\text{CO}$

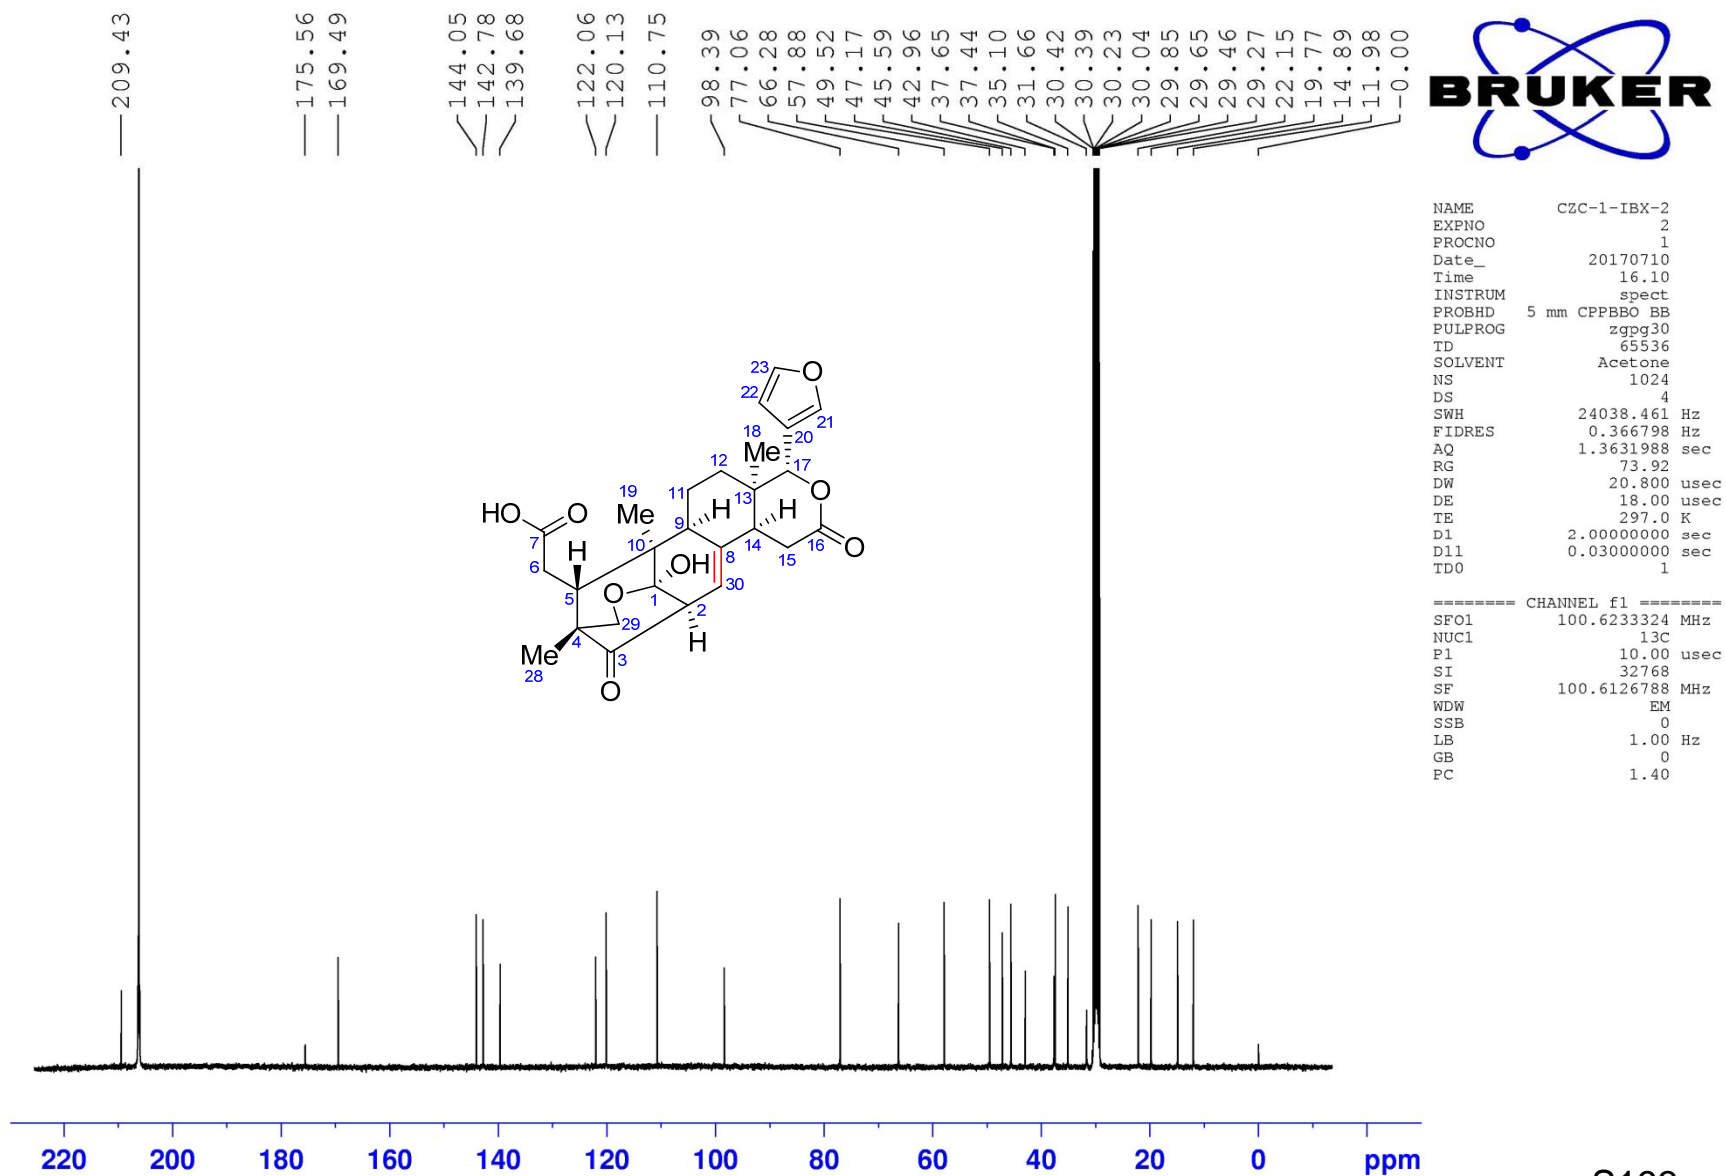

$^{13}\text{C}$  NMR (100 MHz) spectrum of **10** in  $(\text{CD}_3)_2\text{CO}$

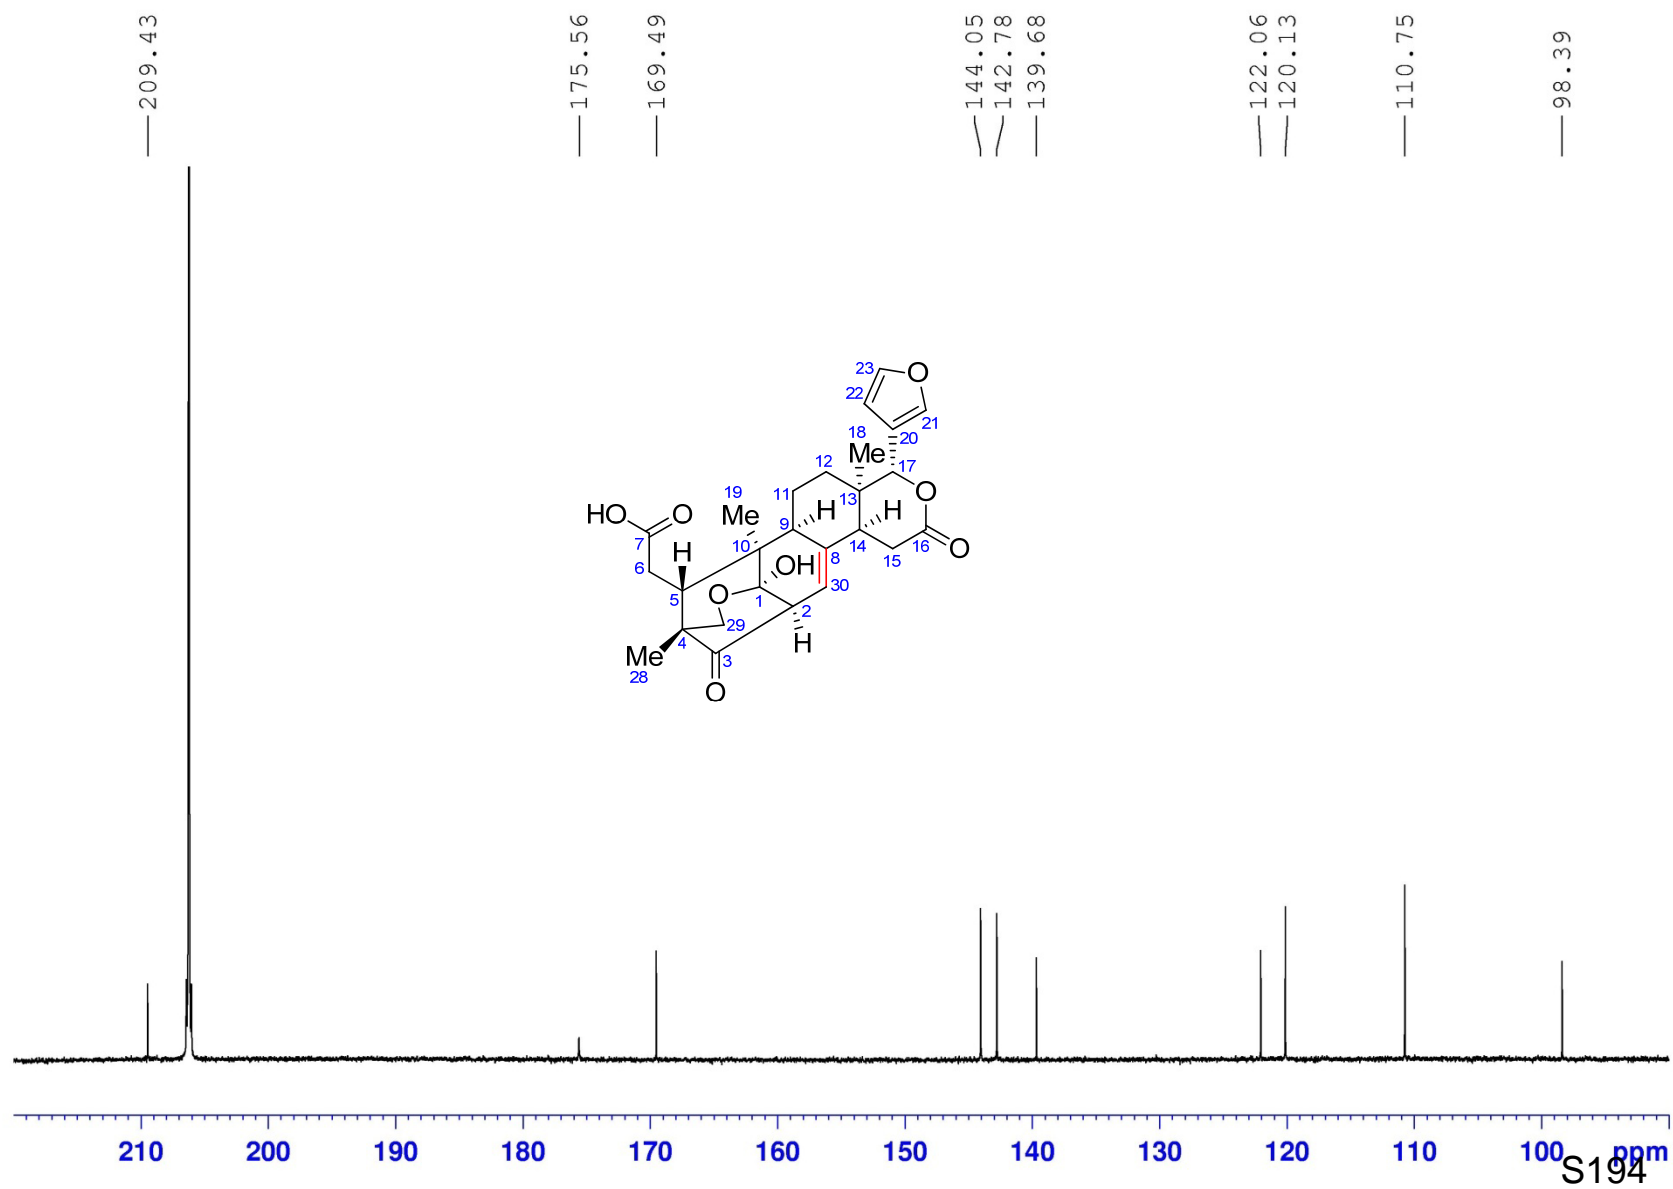



$^{13}\text{C}$  NMR (100 MHz) spectrum of **10** in  $(\text{CD}_3)_2\text{CO}$

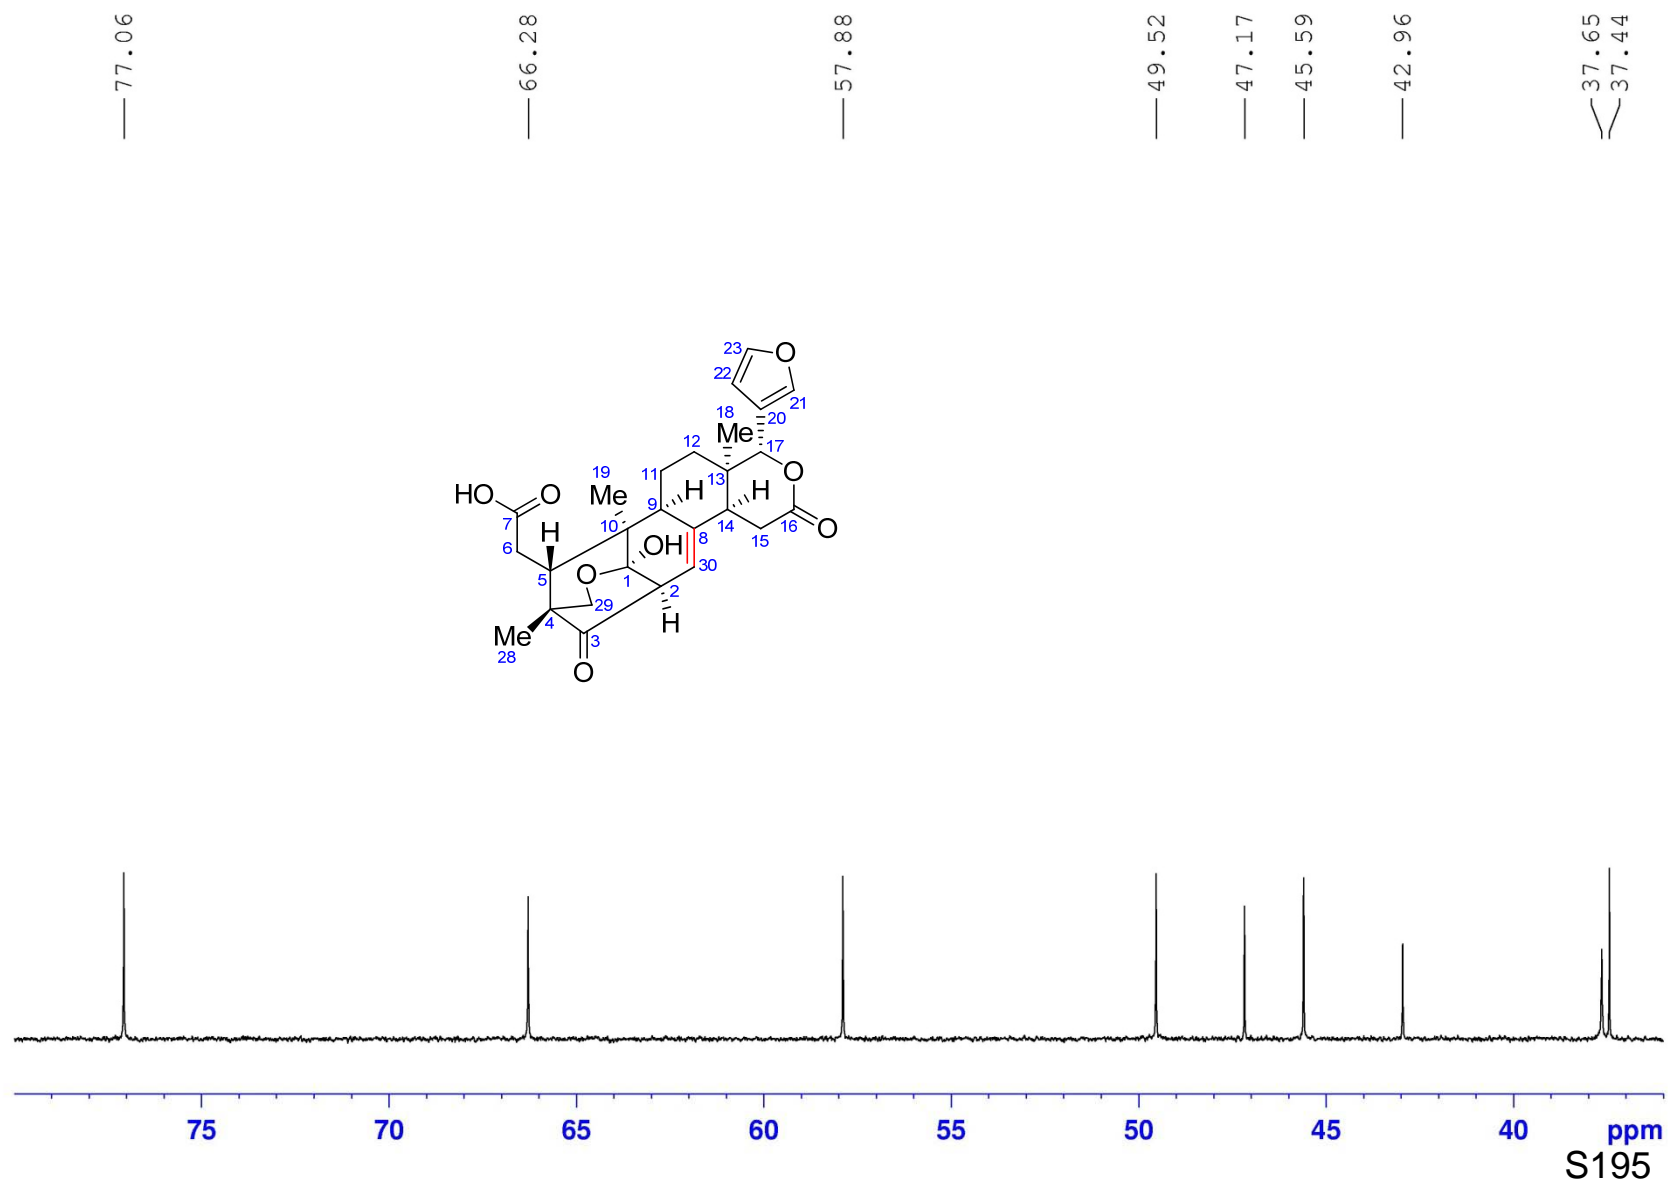

$^{13}\text{C}$  NMR (100 MHz) spectrum of **10** in  $(\text{CD}_3)_2\text{CO}$

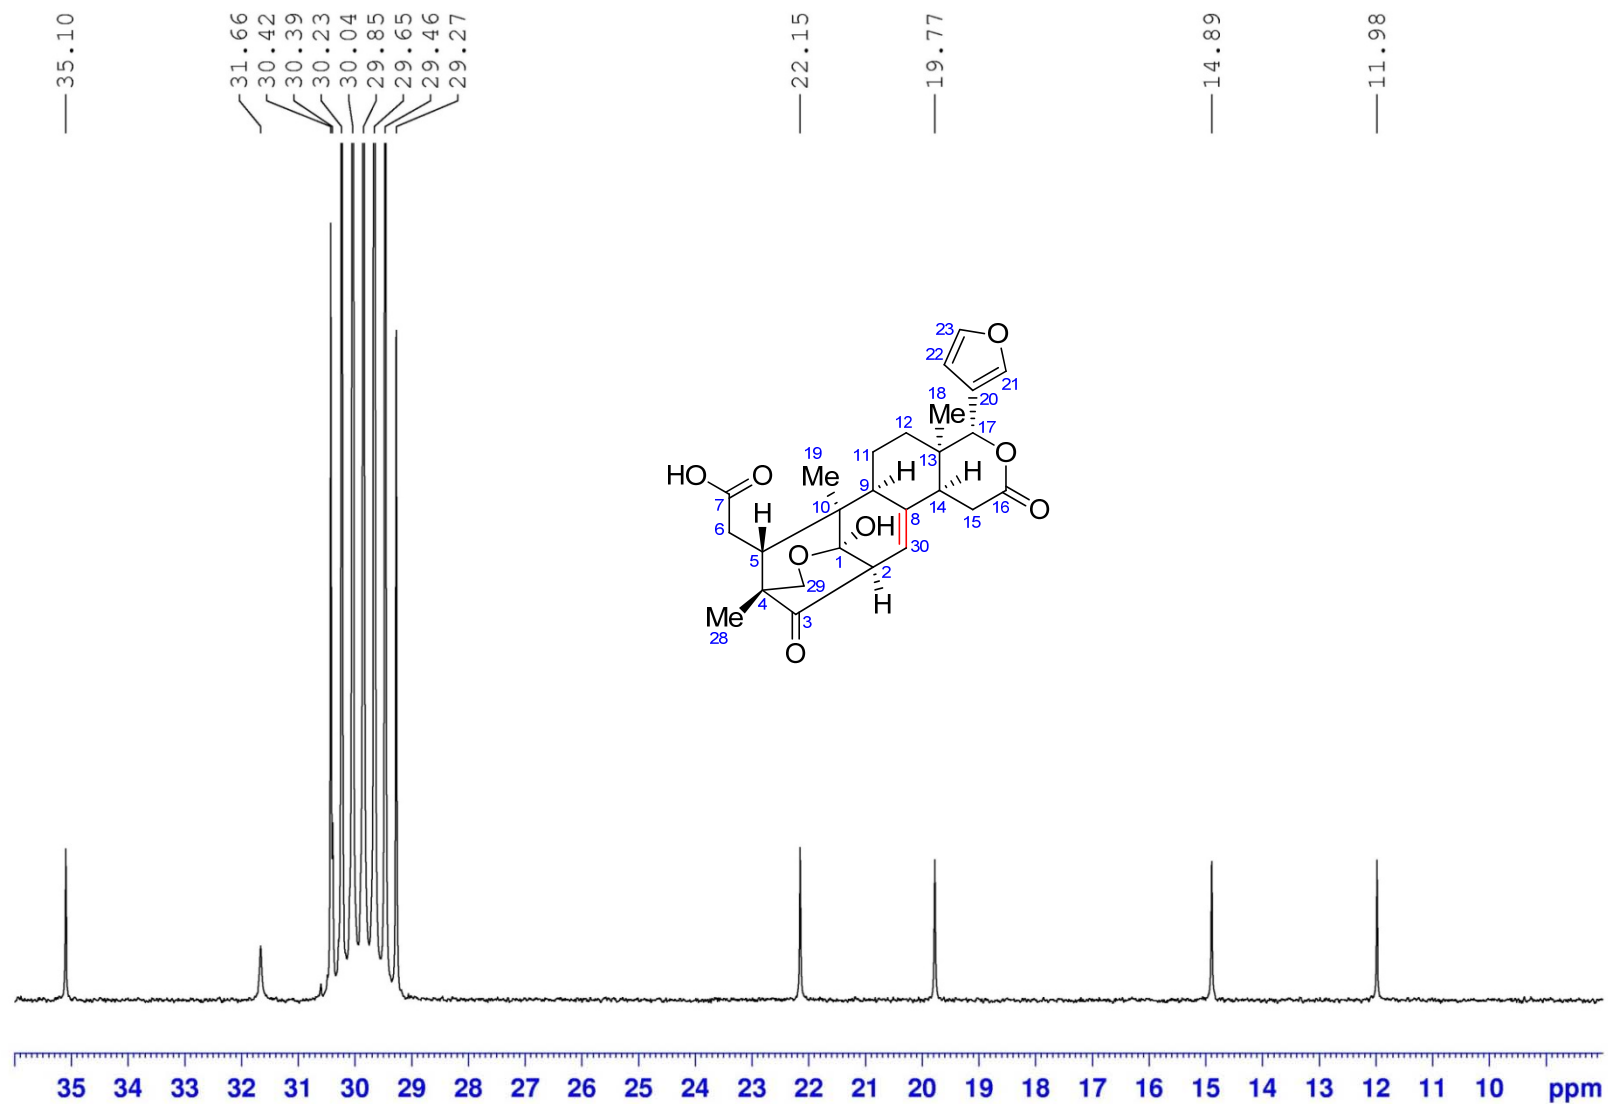

# DEPT 135 spectrum of **10** in (CD<sub>3</sub>)<sub>2</sub>CO

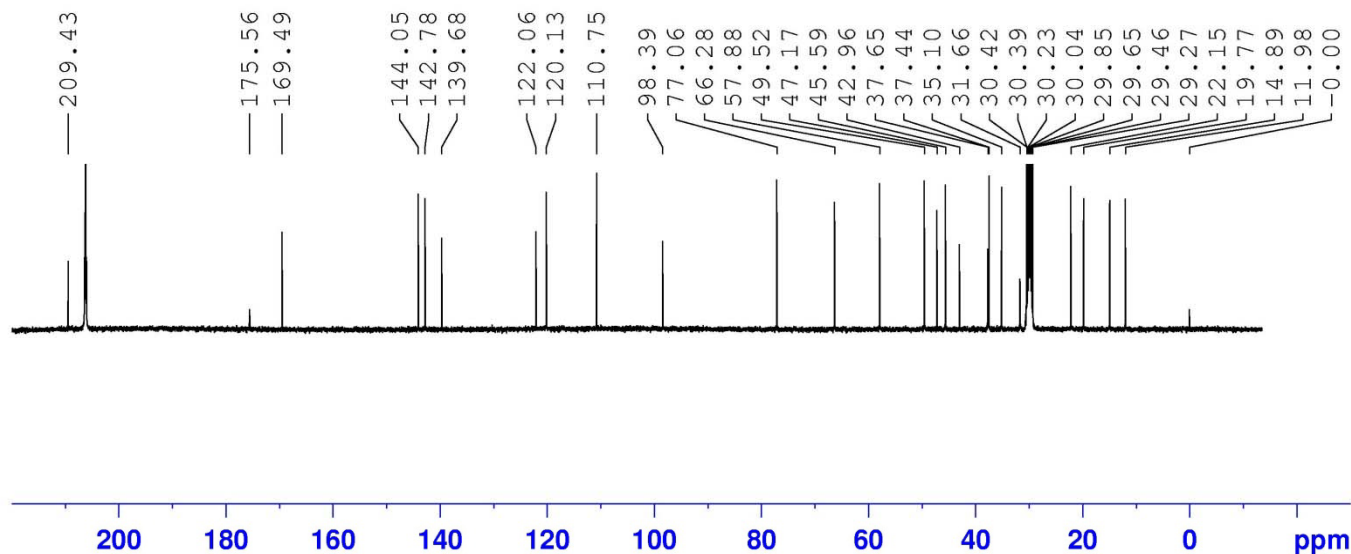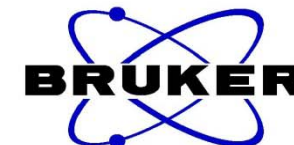

```

NAME      CZC-1-IBX-2
EXPNO     3
PROCNO    1
Date_     20170710
Time      16.28
INSTRUM   spect
PROBHD    5 mm CPPBBO BB
PULPROG   deptspl35
TD        65536
SOLVENT   Acetone
NS        300
DS        4
SWH       24038.461 Hz
FIDRES    0.366798 Hz
AQ        1.3631988 sec
RG        130.26
DW        20.800 usec
DE        18.00 usec
TE        297.0 K
CNST2     145.0000000
D1        2.00000000 sec
D2        0.00344828 sec
D12       0.00002000 sec
TD0       1
    
```

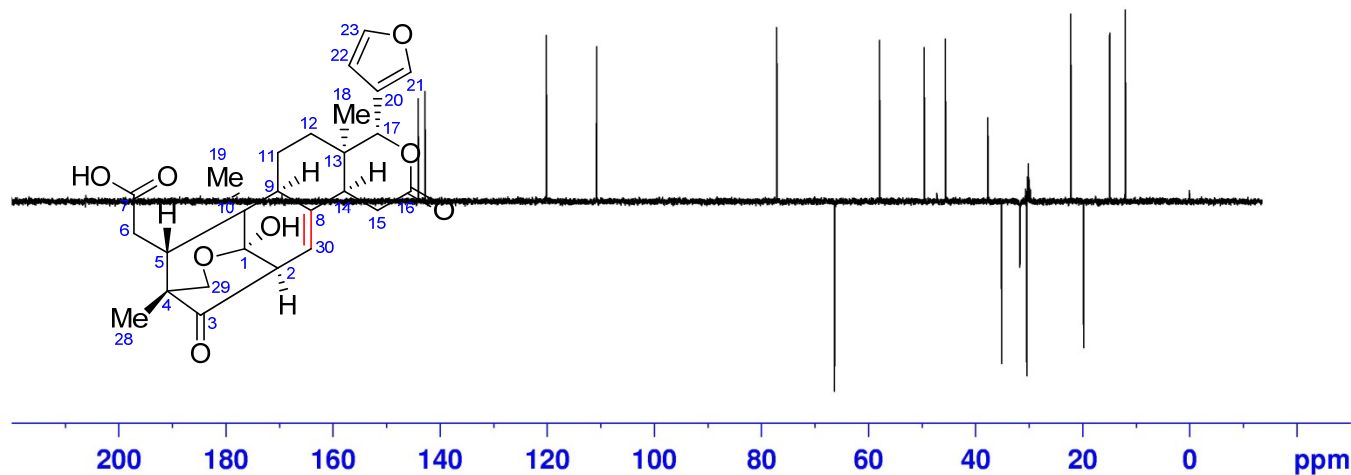

```

===== CHANNEL f1 =====
SFO1     100.6233324 MHz
NUC1     13C
P1       10.00 usec
P13      2000.00 usec
SI       32768
SF       100.6126794 MHz
WDW      EM
SSB      0
LB       1.00 Hz
GB       0
PC       1.40
    
```

# DEPT 135 spectrum of **10** in (CD<sub>3</sub>)<sub>2</sub>CO

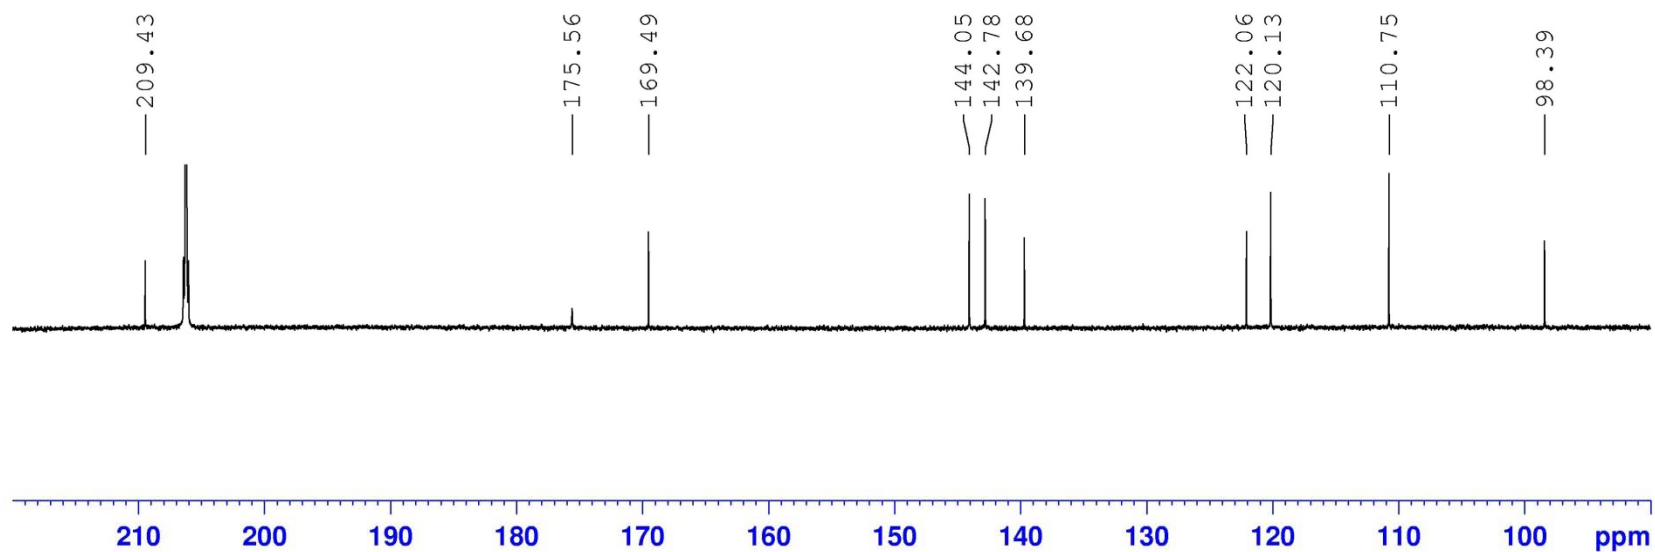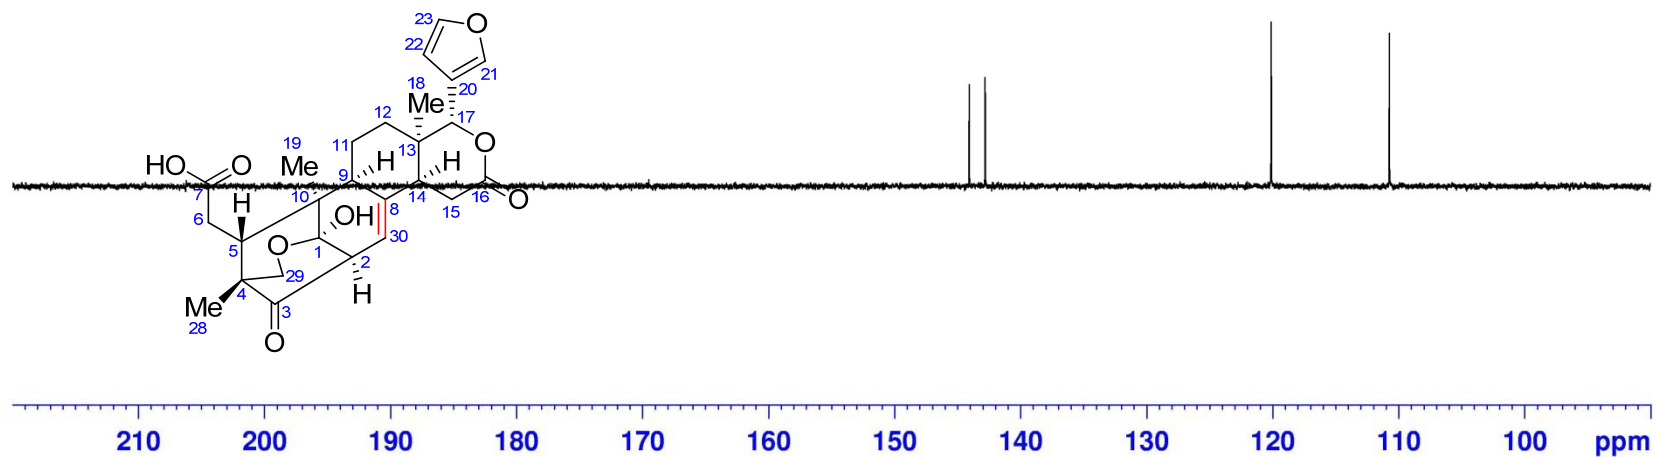

DEPT 135 spectrum of **10** in  $(\text{CD}_3)_2\text{CO}$

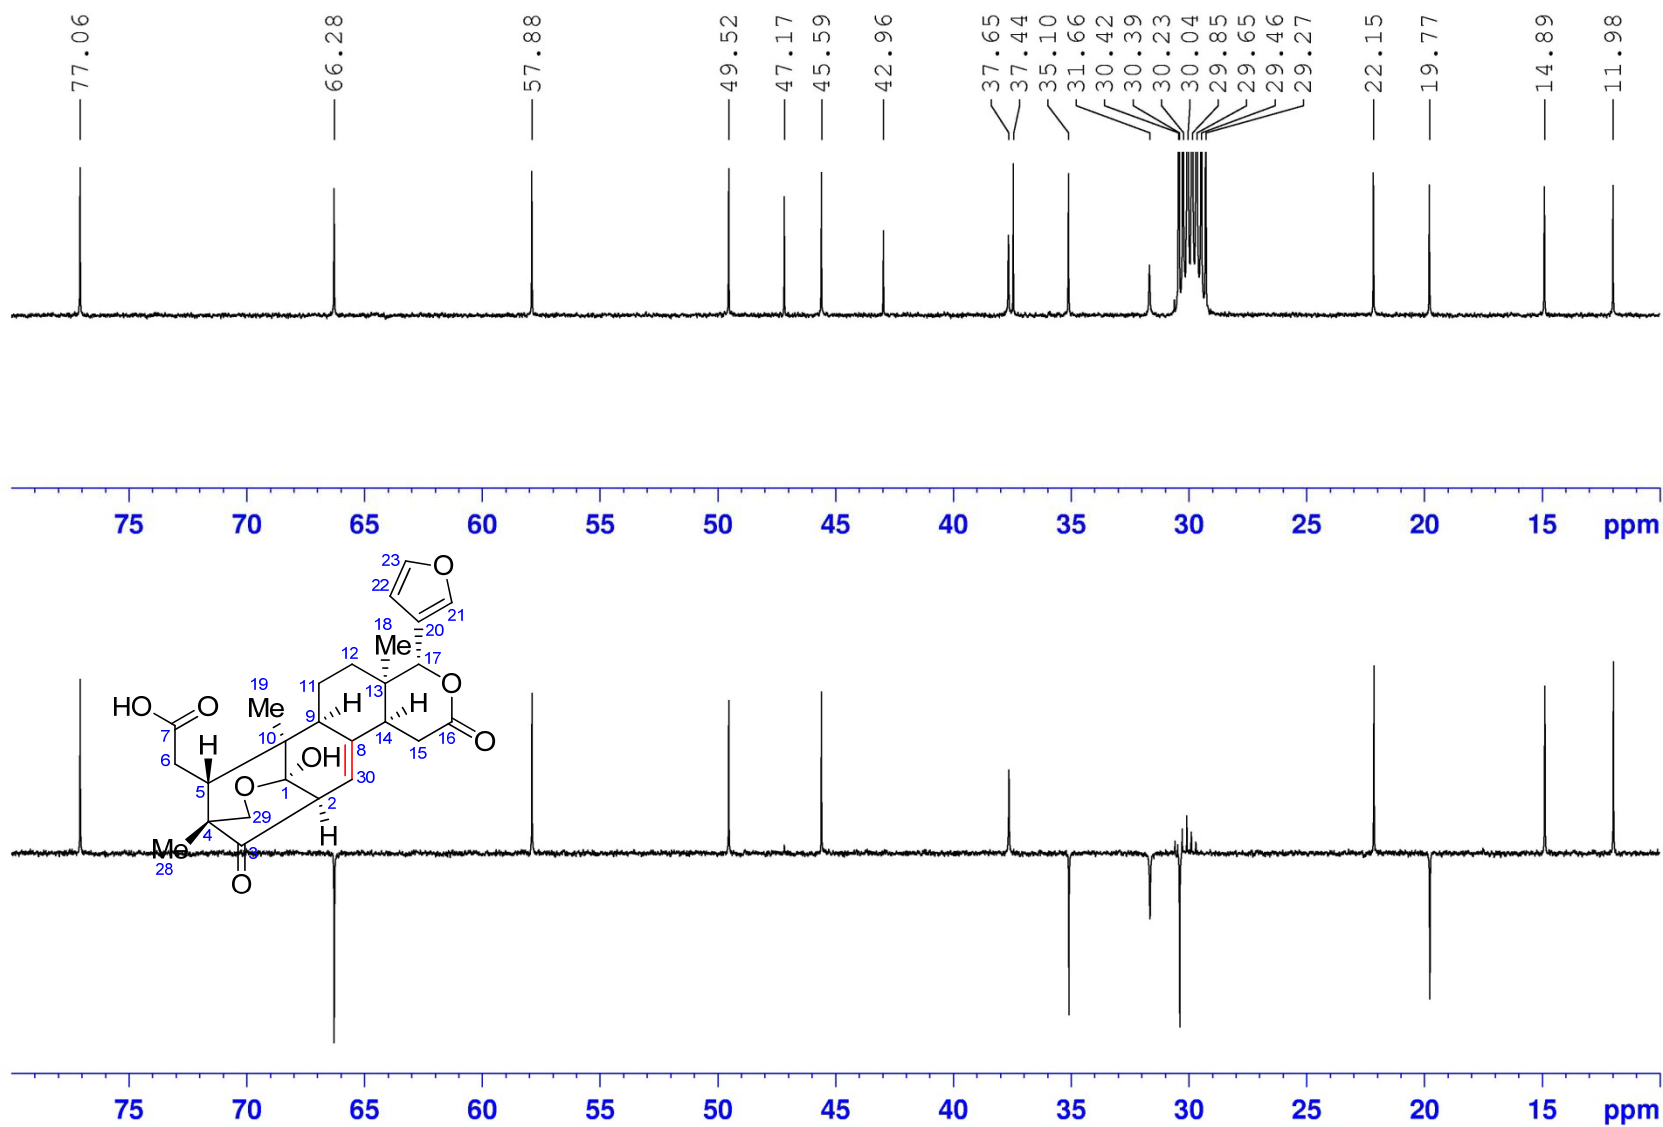

# LR-ESIMS for compound **10a**

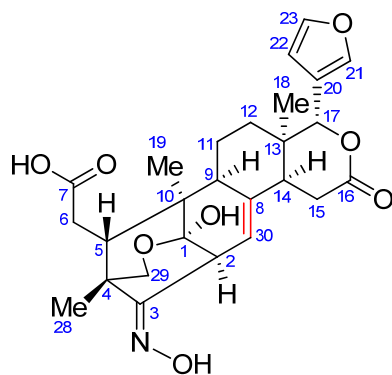

## Generic Display Report

Analysis Info  
Analysis Name D:\MS\RJL\20181001\78\_RA1\_01\_1590.d  
Method lc-7.9  
Sample Name 99140922-alternating-500-50-2200-MS2\_1590.m  
Comment  
Acquisition D 2018/10/1 18:37:27  
Operator bruker  
Instrument amaZon SL

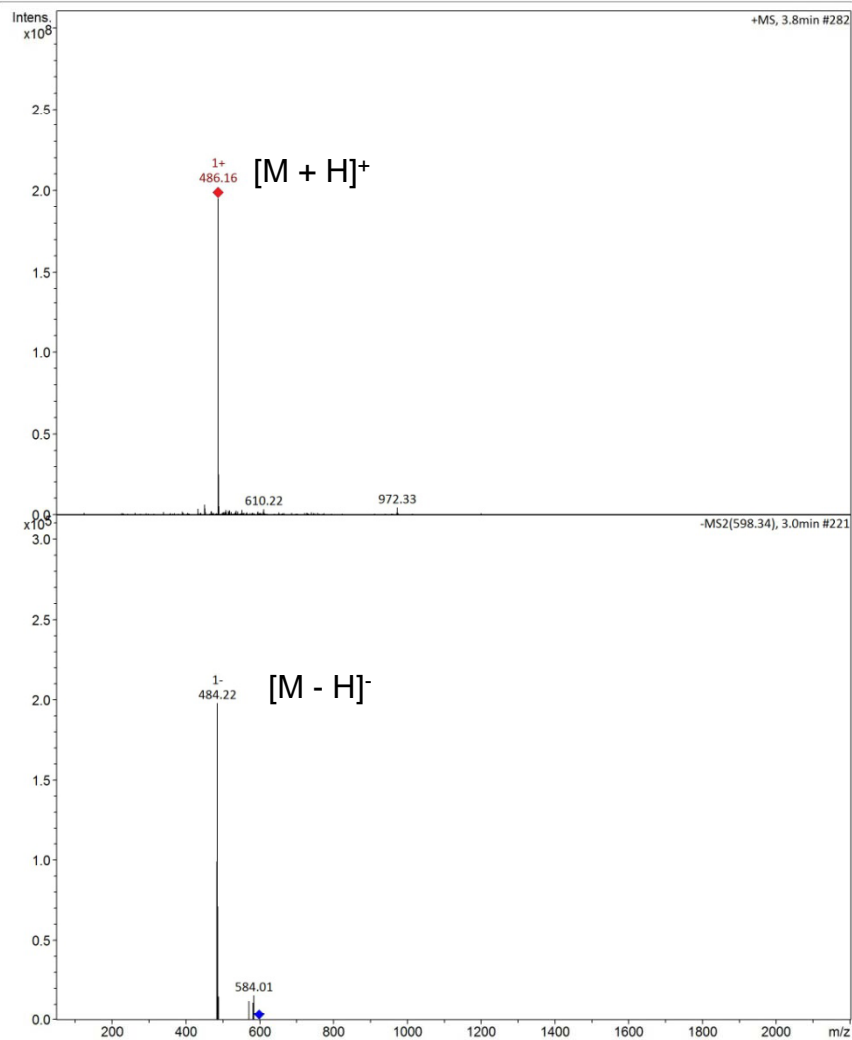

Bruker Compass DataAnalysis

S200

# <sup>1</sup>H NMR (400 MHz) spectrum of **10a** in (CD<sub>3</sub>)<sub>2</sub>CO

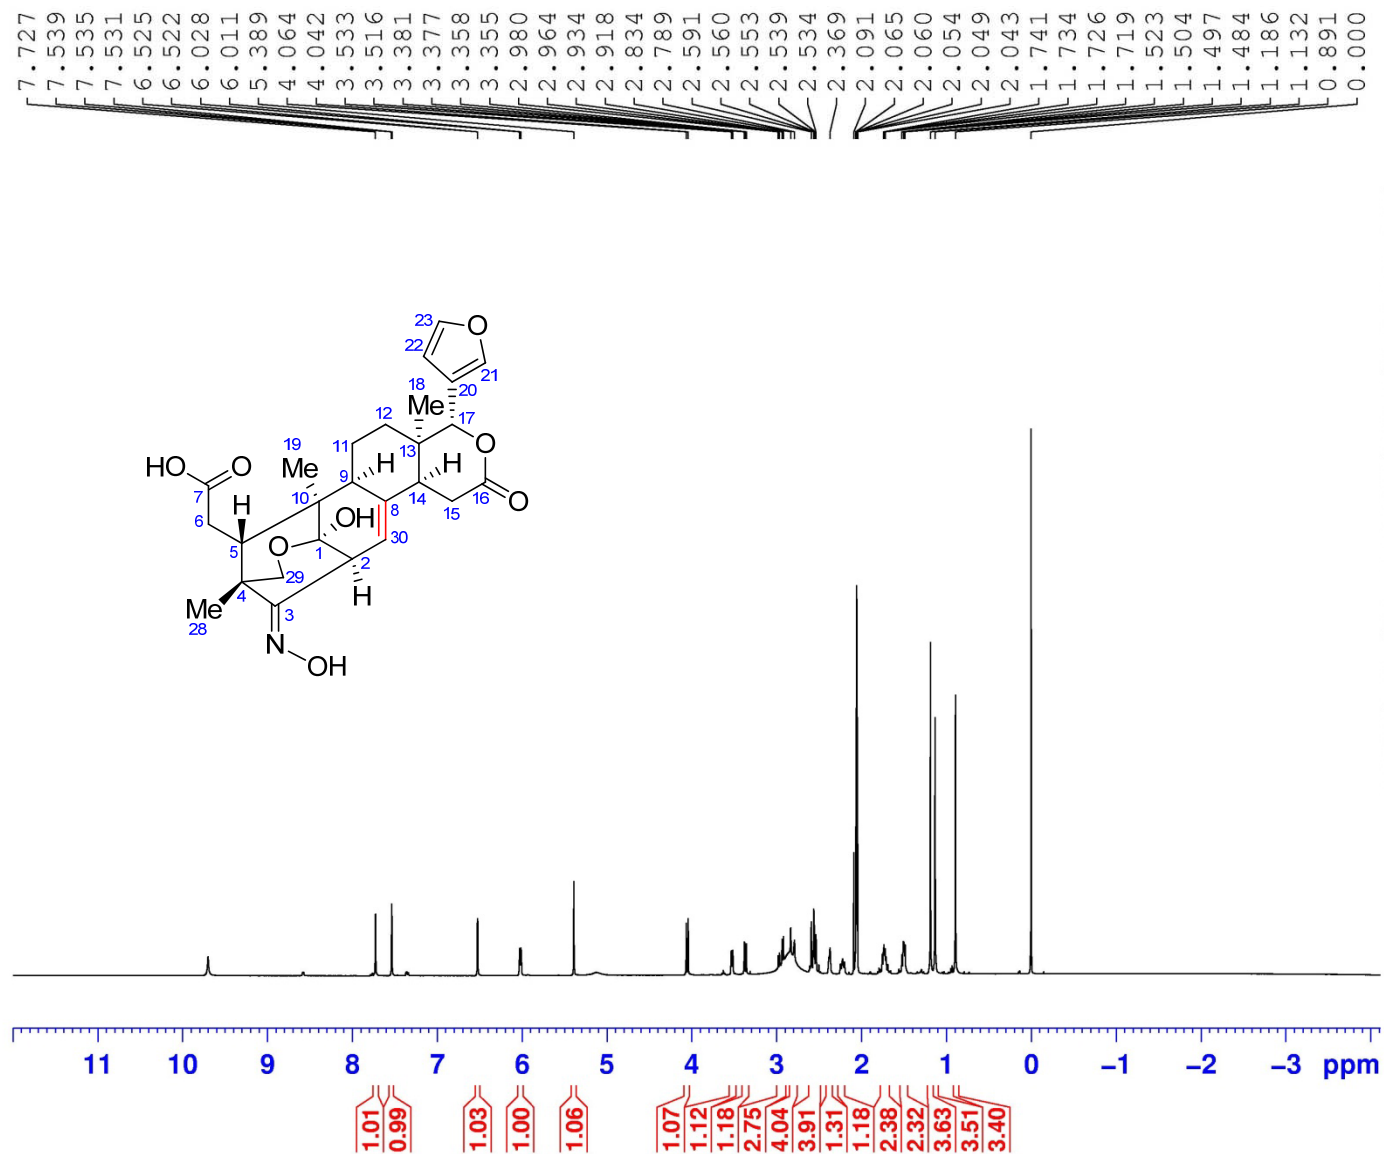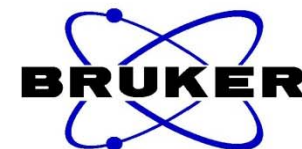

```

NAME      czc-1-ibx-qiangan-2
EXPNO     1
PROCNO    1
Date_     20170725
Time      10.29
INSTRUM   spect
PROBHD    5 mm CYPBBO BB
PULPROG   zg30
TD        65536
SOLVENT   Acetone
NS        16
DS        2
SWH       8223.685 Hz
FIDRES    0.125483 Hz
AQ        3.9846387 sec
RG        208.5
DW        60.800 usec
DE        10.00 usec
TE        297.0 K
D1        1.00000000 sec
TD0       1
    
```

```

===== CHANNEL f1 =====
SF01    400.1324710 MHz
NUC1     1H
P1       11.50 usec
SI       65536
SF       400.1300052 MHz
WDW      EM
SSB      0
LB       0.30 Hz
GB       0
PC       1.00
    
```

$^1\text{H}$  NMR (400 MHz) spectrum of **10a** in  $(\text{CD}_3)_2\text{CO}$

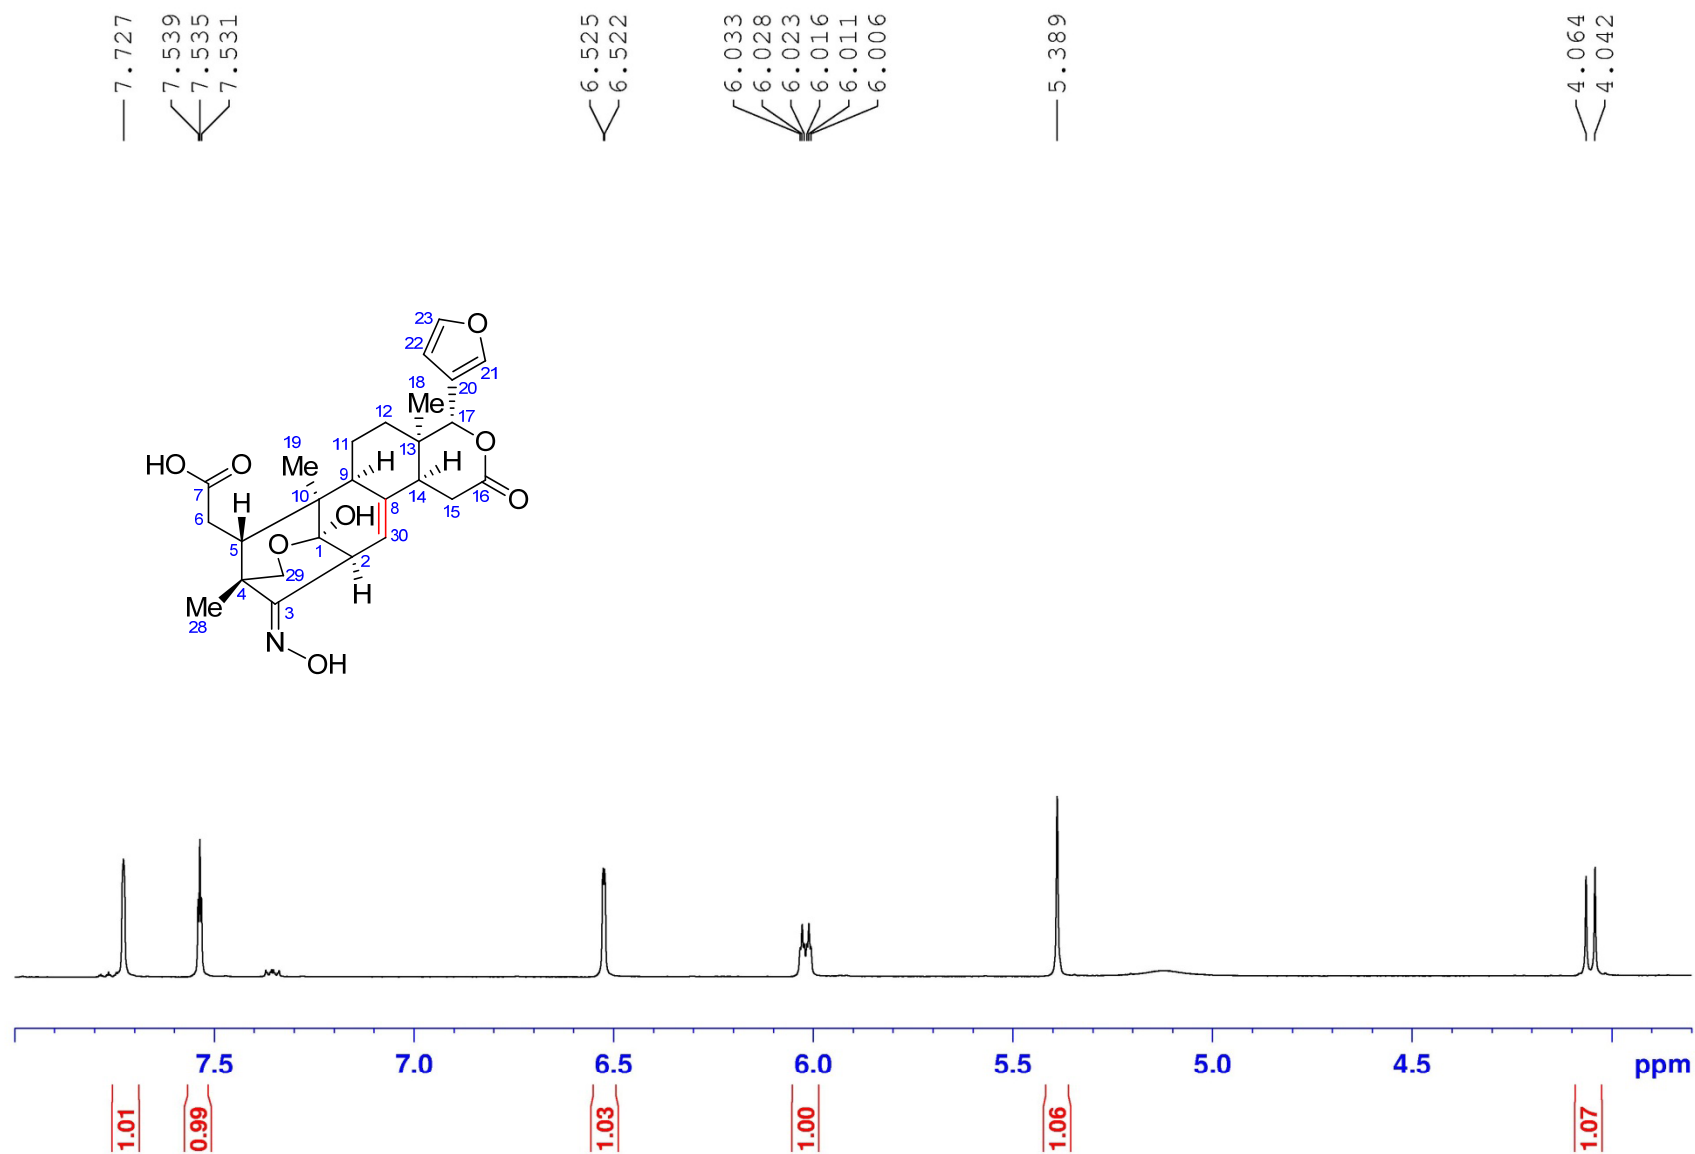

S202



$^1\text{H}$  NMR (400 MHz) spectrum of **10a** in  $(\text{CD}_3)_2\text{CO}$

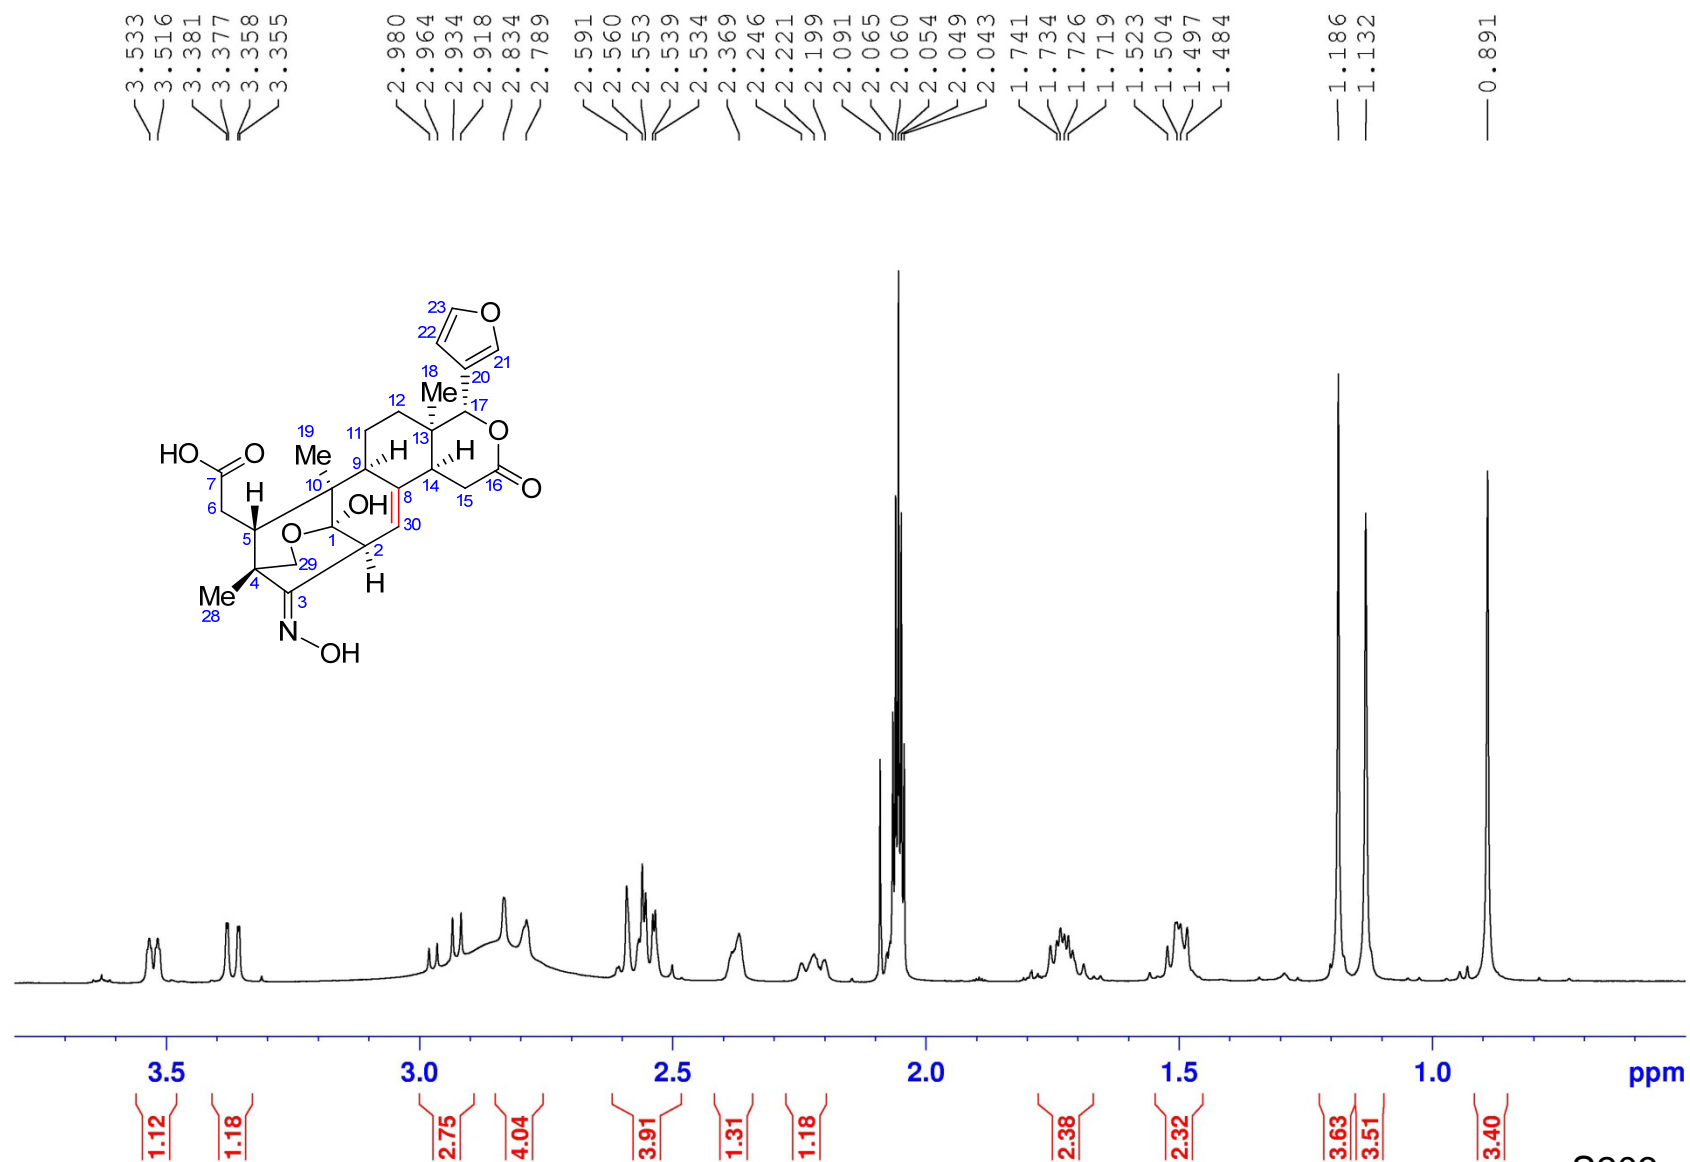

$^{13}\text{C}$  NMR (100 MHz) spectrum of **10a** in  $(\text{CD}_3)_2\text{CO}$

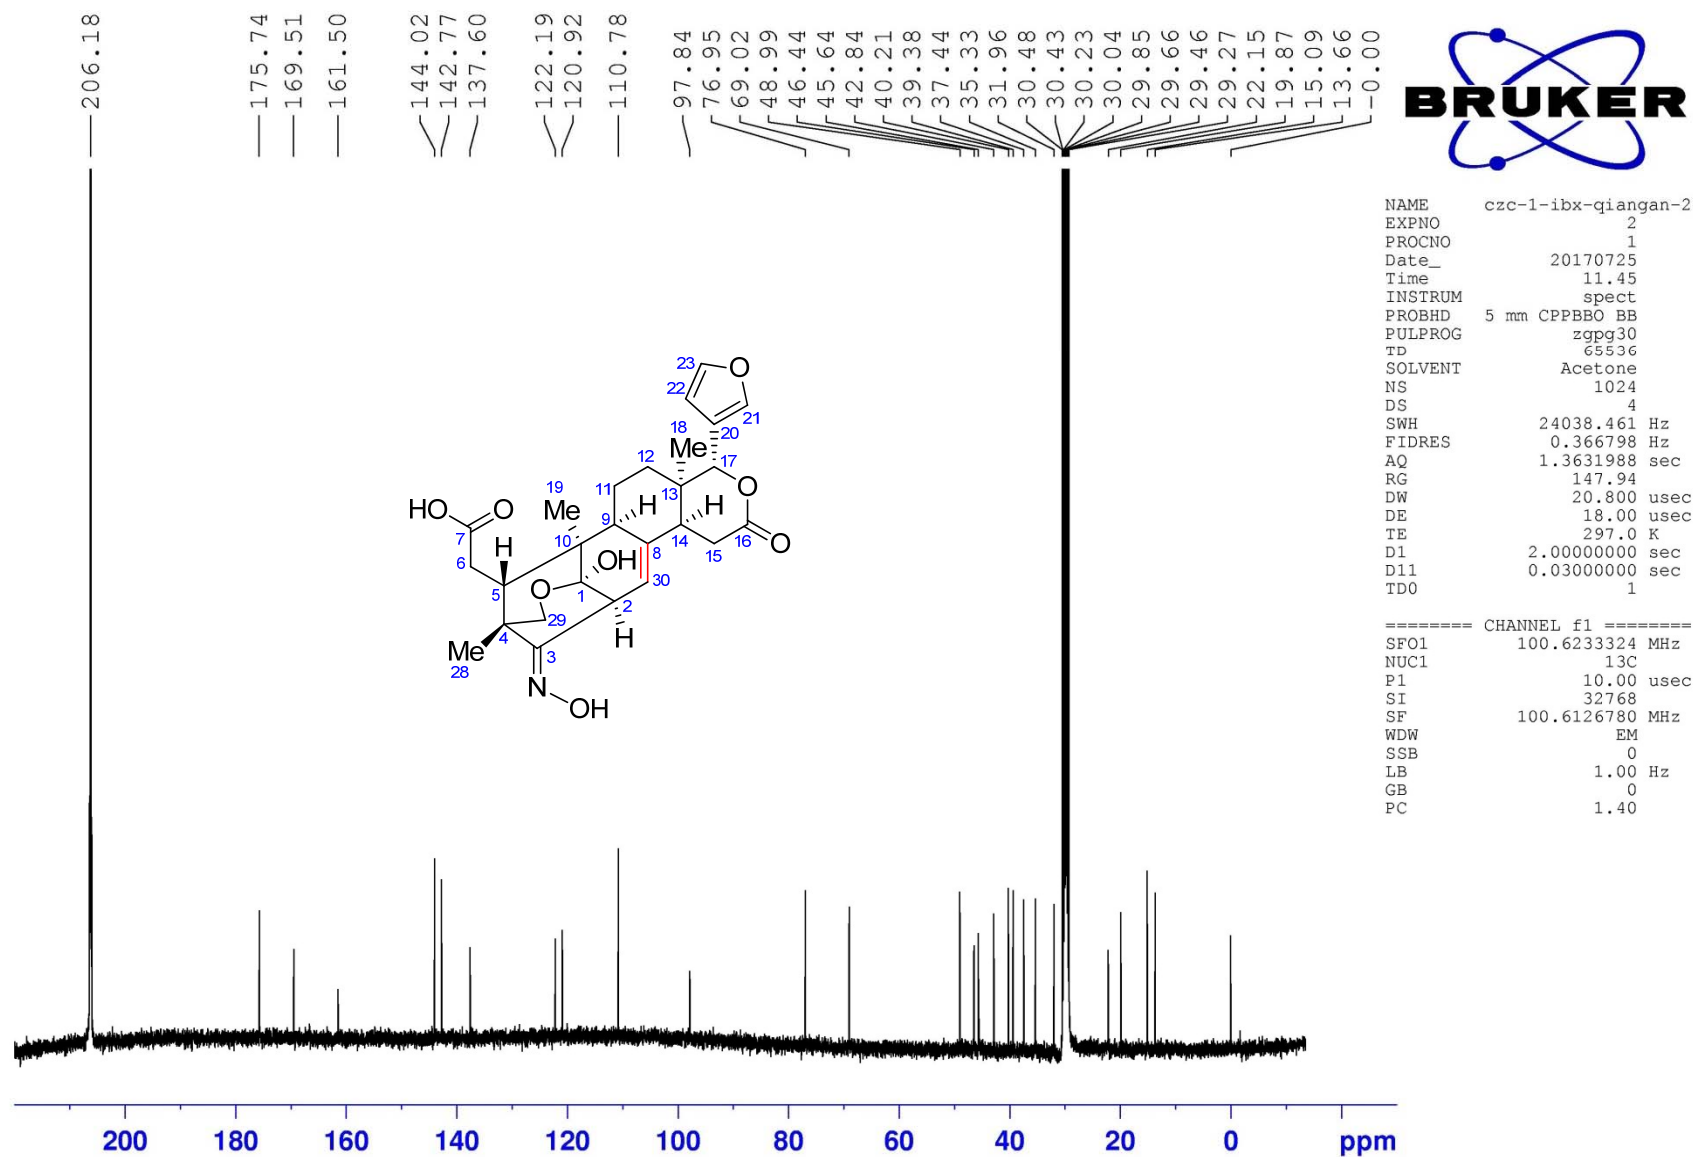

$^{13}\text{C}$  NMR (100 MHz) spectrum of **10a** in  $(\text{CD}_3)_2\text{CO}$

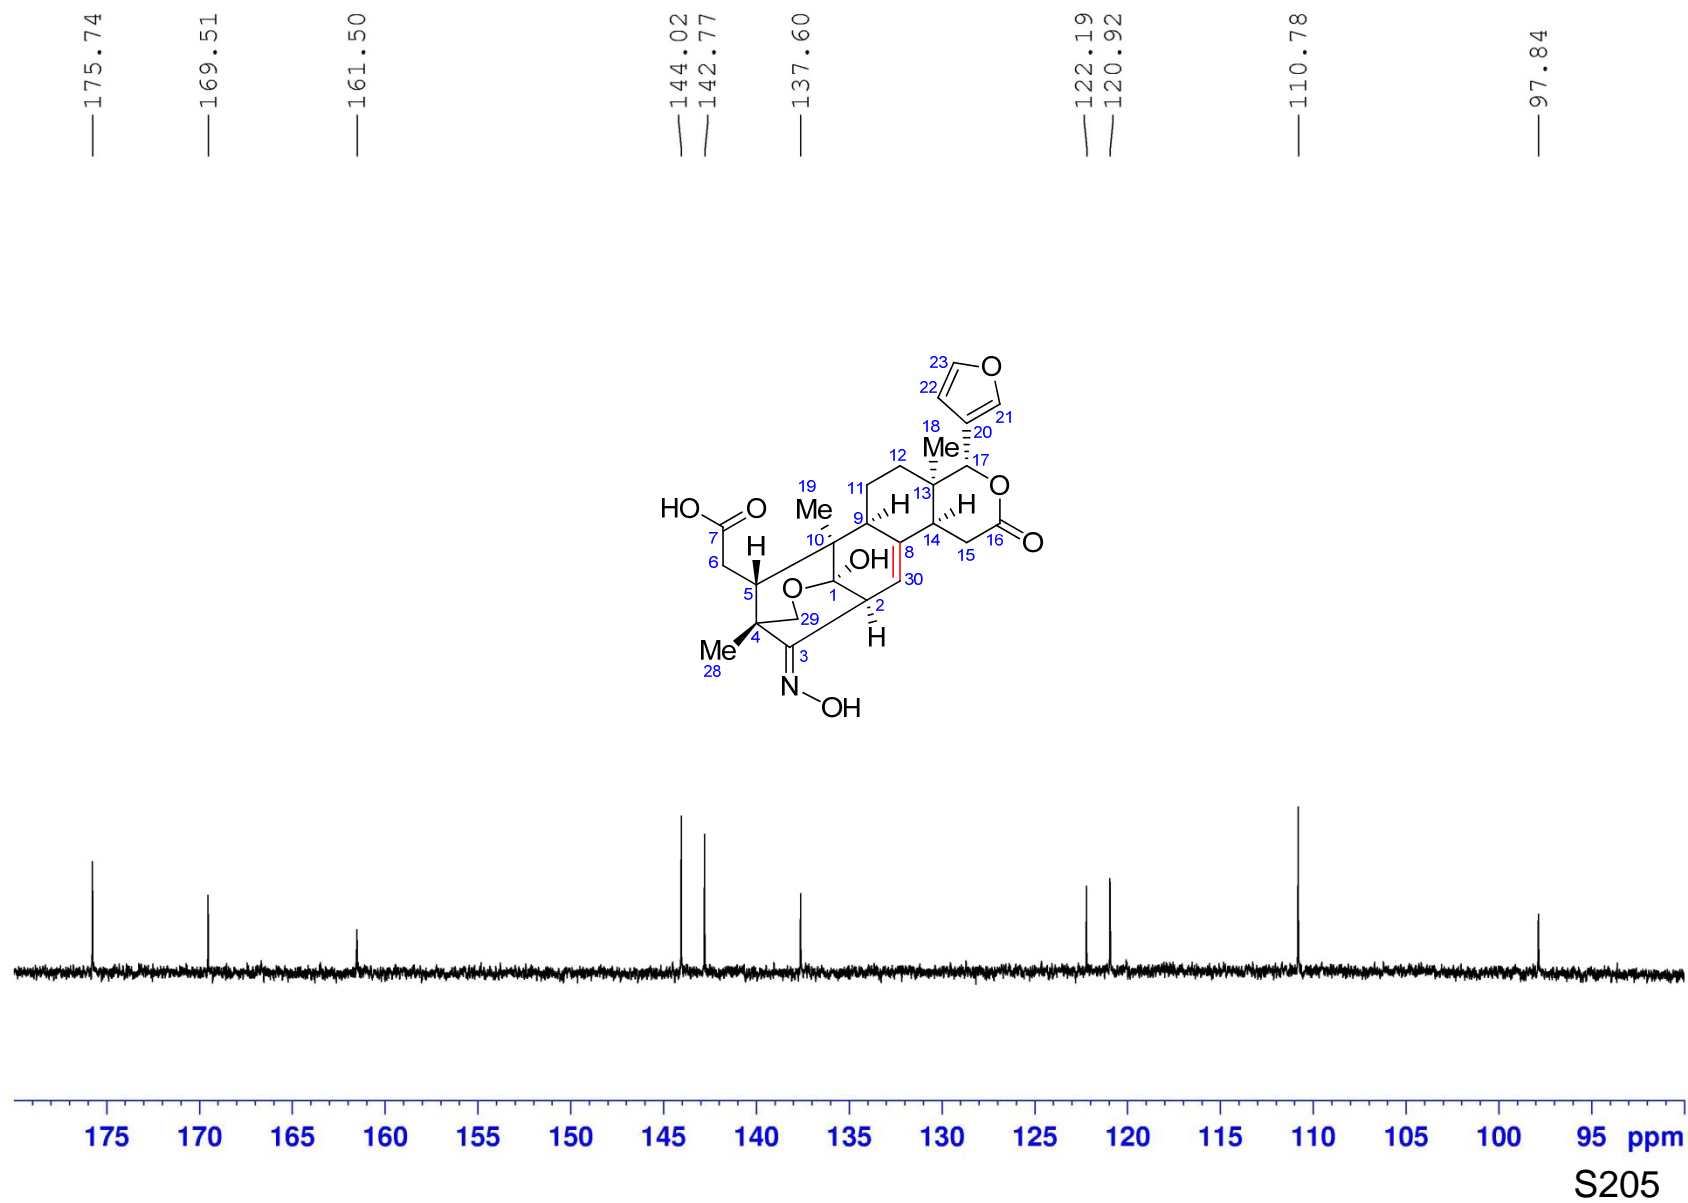

$^{13}\text{C}$  NMR (100 MHz) spectrum of **10a** in  $(\text{CD}_3)_2\text{CO}$

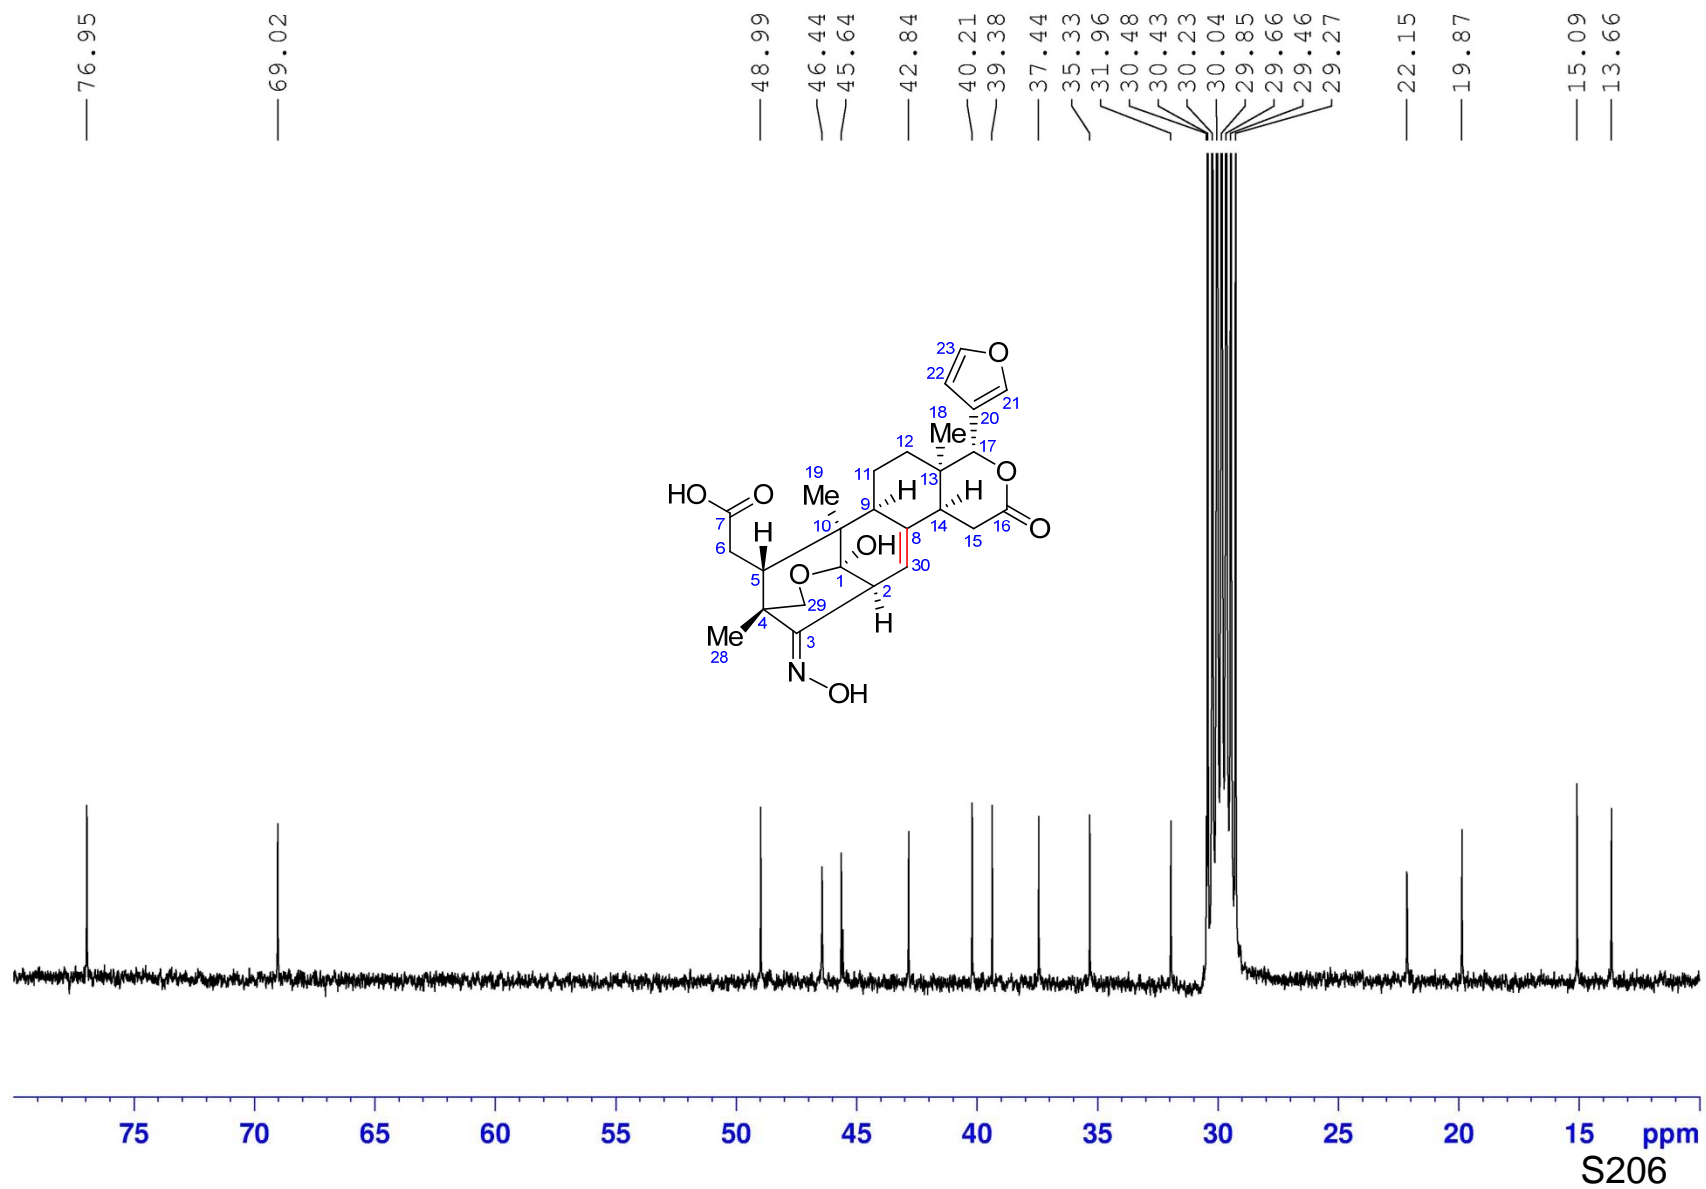

# DEPT 135 spectrum of **10a** in (CD<sub>3</sub>)<sub>2</sub>CO

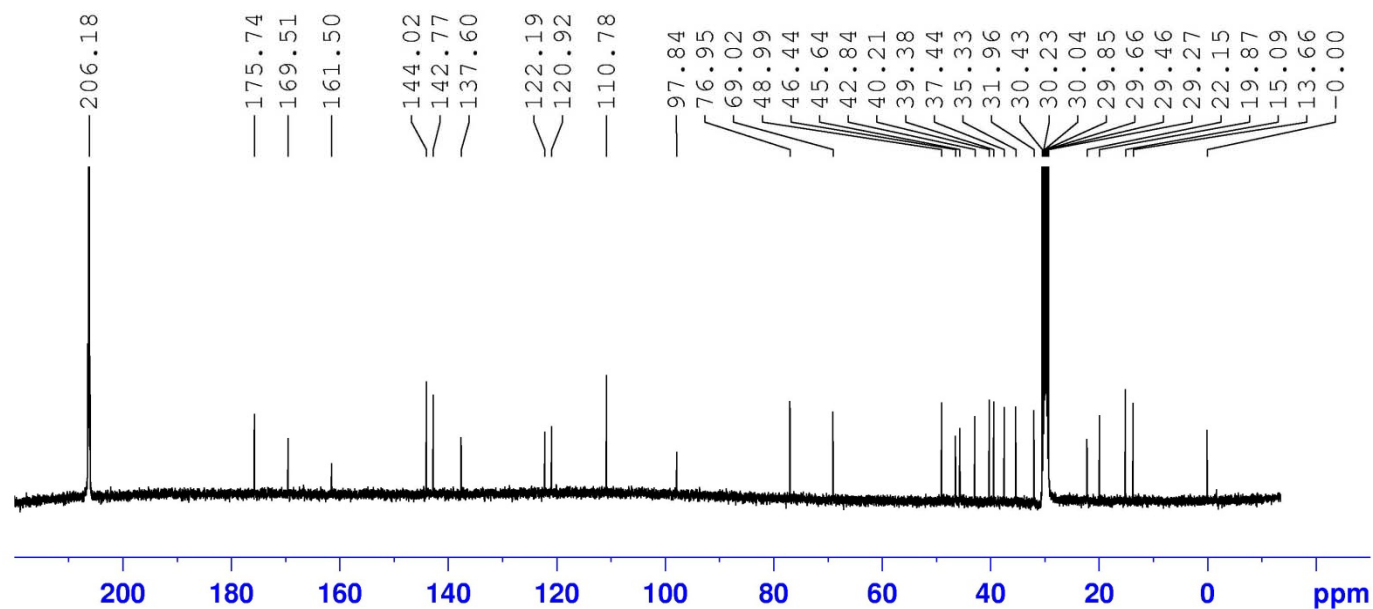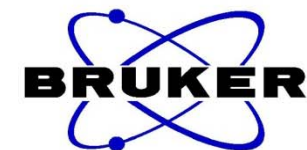

```

NAME      czc-1-ibx-qiangan-2
EXPNO     2
PROCNO    1
Date_     20170725
Time      11.45
INSTRUM   spect
PROBHD    5 mm CPPBBO BB
PULPROG   zgpg30
TD        65536
SOLVENT   Acetone
NS        1024
DS        4
SWH       24038.461 Hz
FIDRES    0.366798 Hz
AQ        1.3631988 sec
RG        147.94
DW        20.800 usec
DE        18.00 usec
TE        297.0 K
D1        2.00000000 sec
D11       0.03000000 sec
TD0       1
  
```

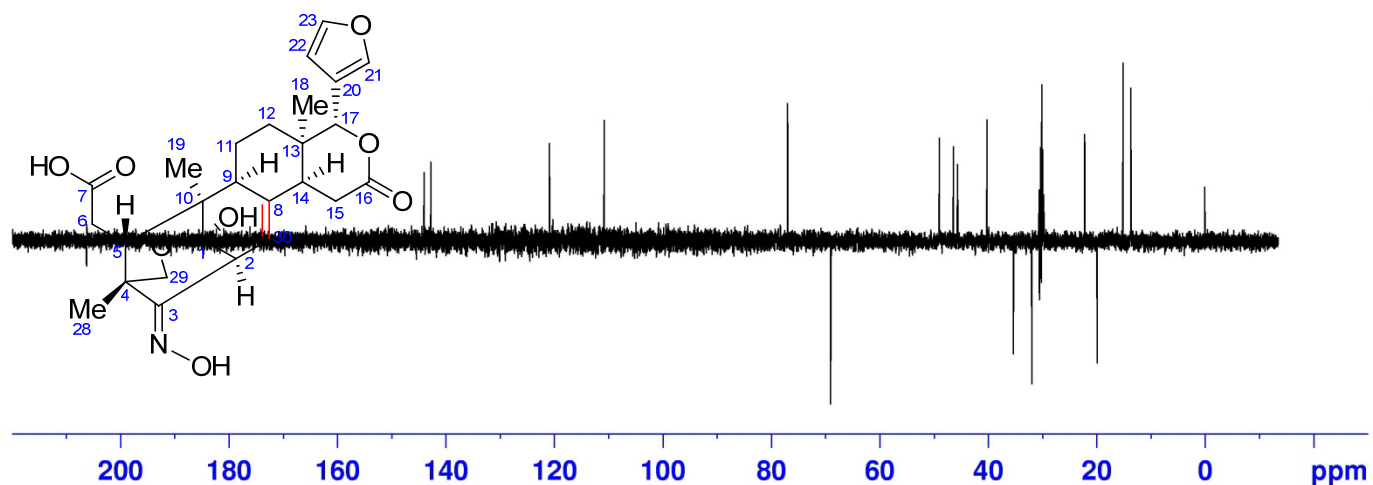

```

===== CHANNEL f1 =====
SFO1      100.6233324 MHz
NUC1      13C
P1        10.00 usec
SI        32768
SF        100.6126780 MHz
WDW       EM
SSB       0
LB        1.00 Hz
GB        0
PC        1.40
  
```

# DEPT 135 spectrum of **10a** in (CD<sub>3</sub>)<sub>2</sub>CO

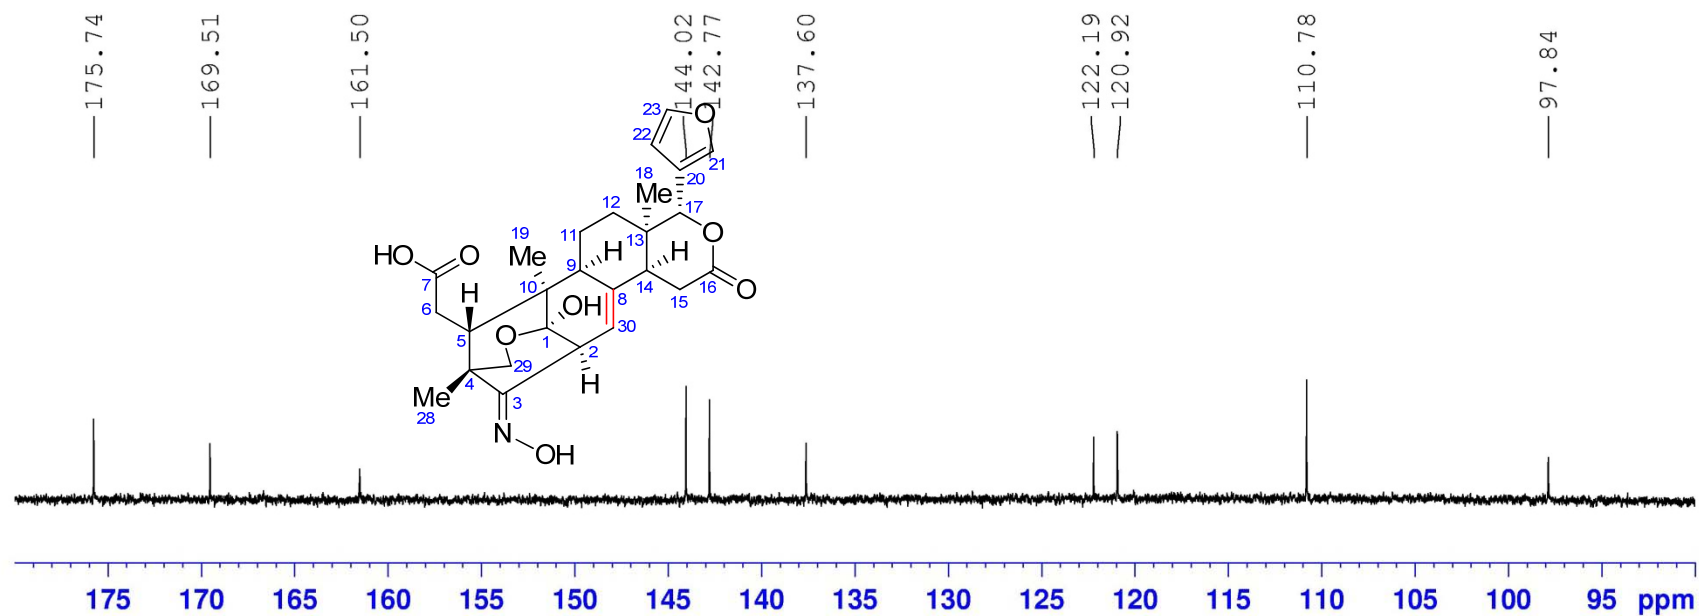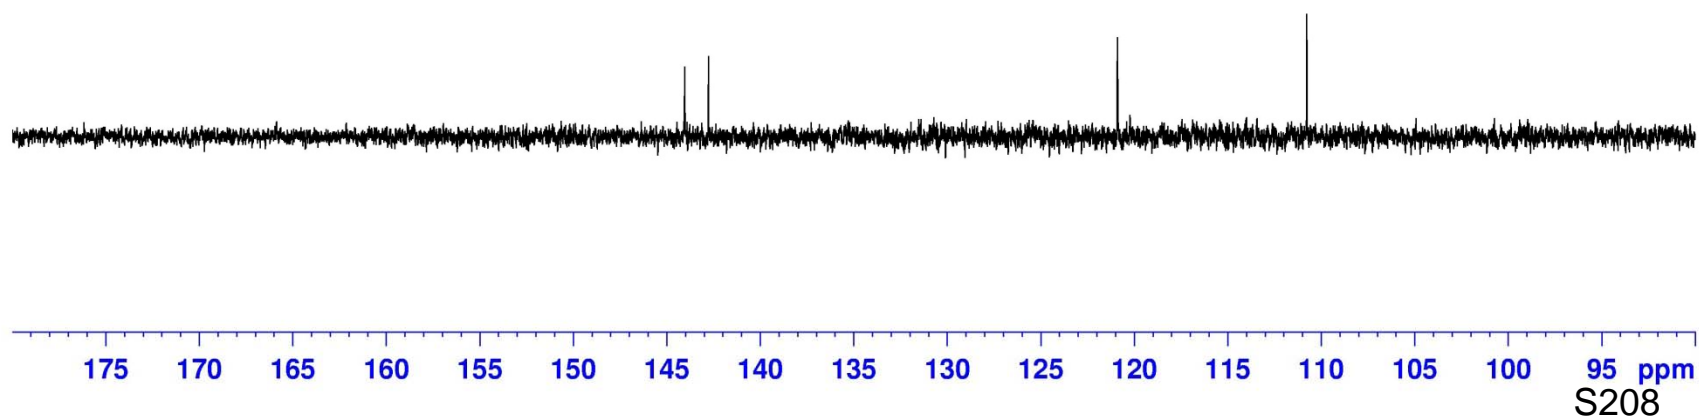

# DEPT 135 spectrum of **10a** in (CD<sub>3</sub>)<sub>2</sub>CO

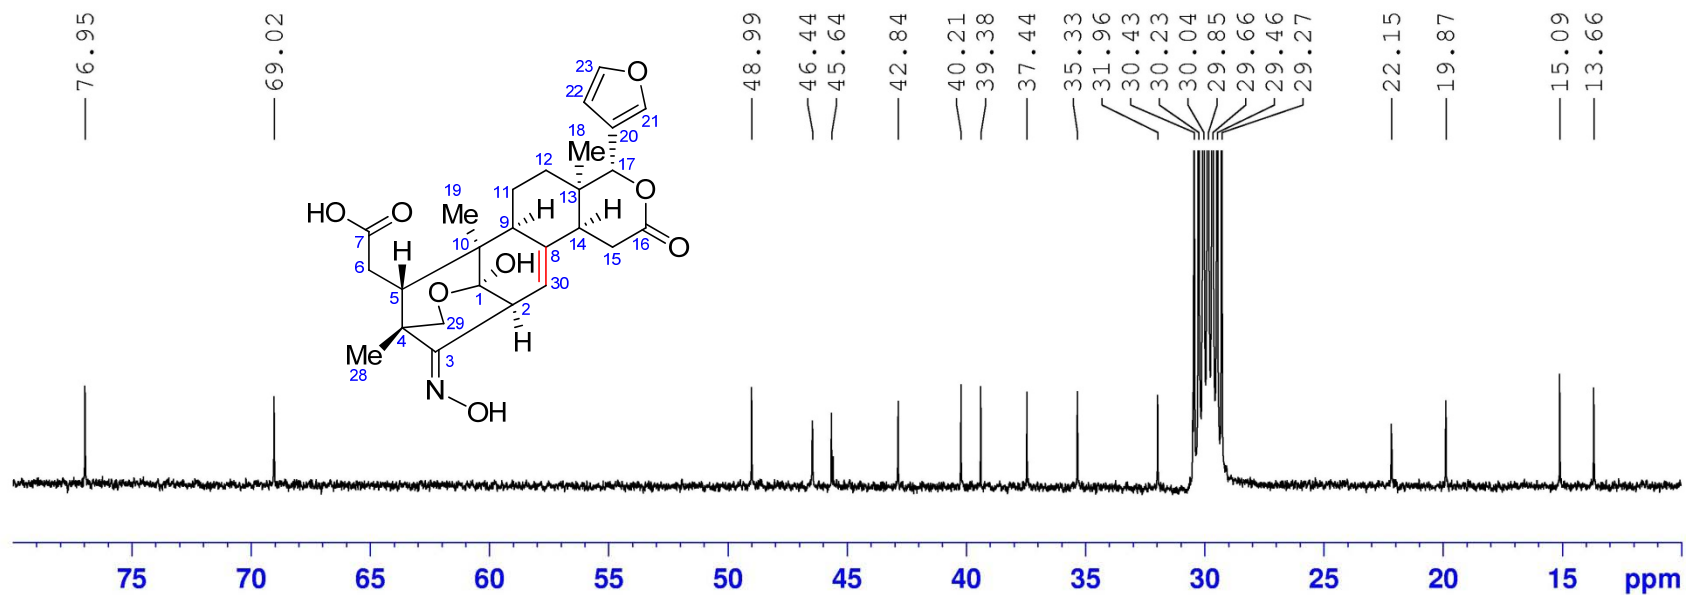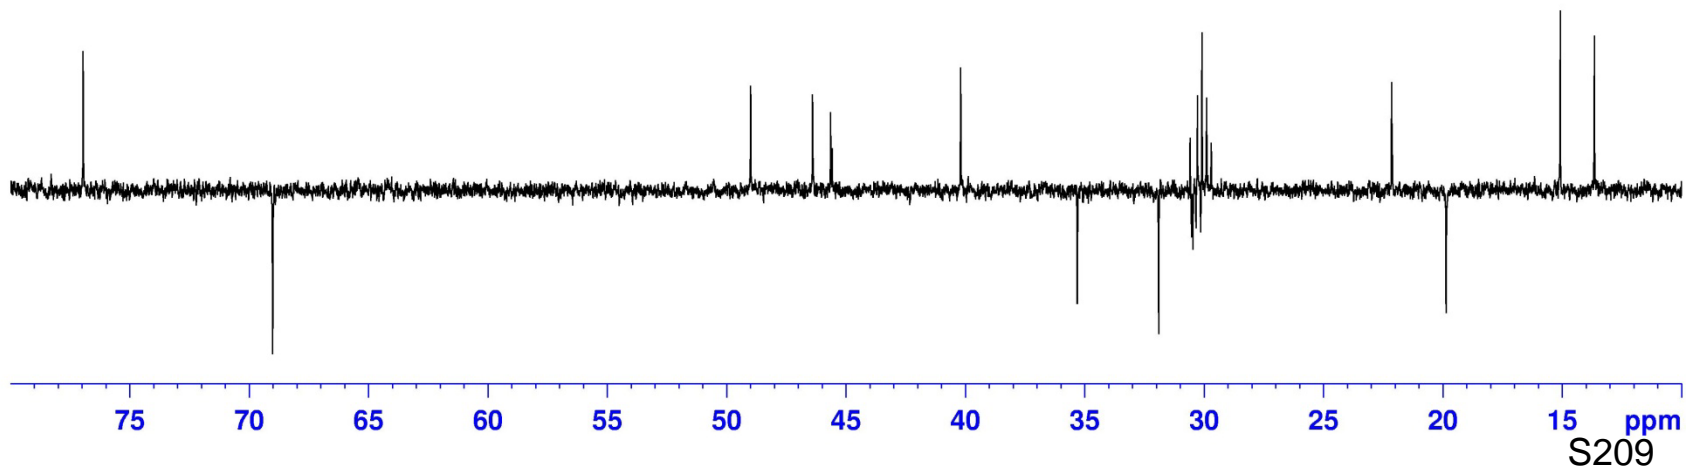

# LR-ESIMS for compound **10b**

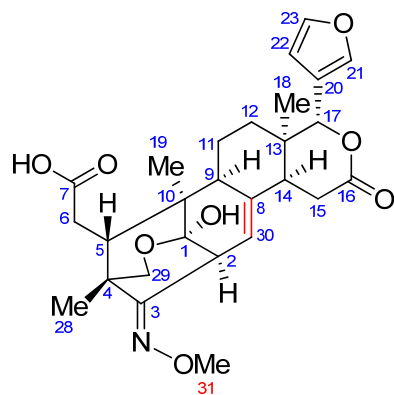

## Generic Display Report

### Analysis Info

Analysis Name D:\MS\RJL\20181001\79\_RA1\_01\_1591.d  
Method lc-7.9  
Sample Name 99140922-alternating-500-50-2200-MS2\_1591.m  
Comment

Acquisition D 2018/10/1 18:49:27

Operator bruker  
Instrument amaZon SL

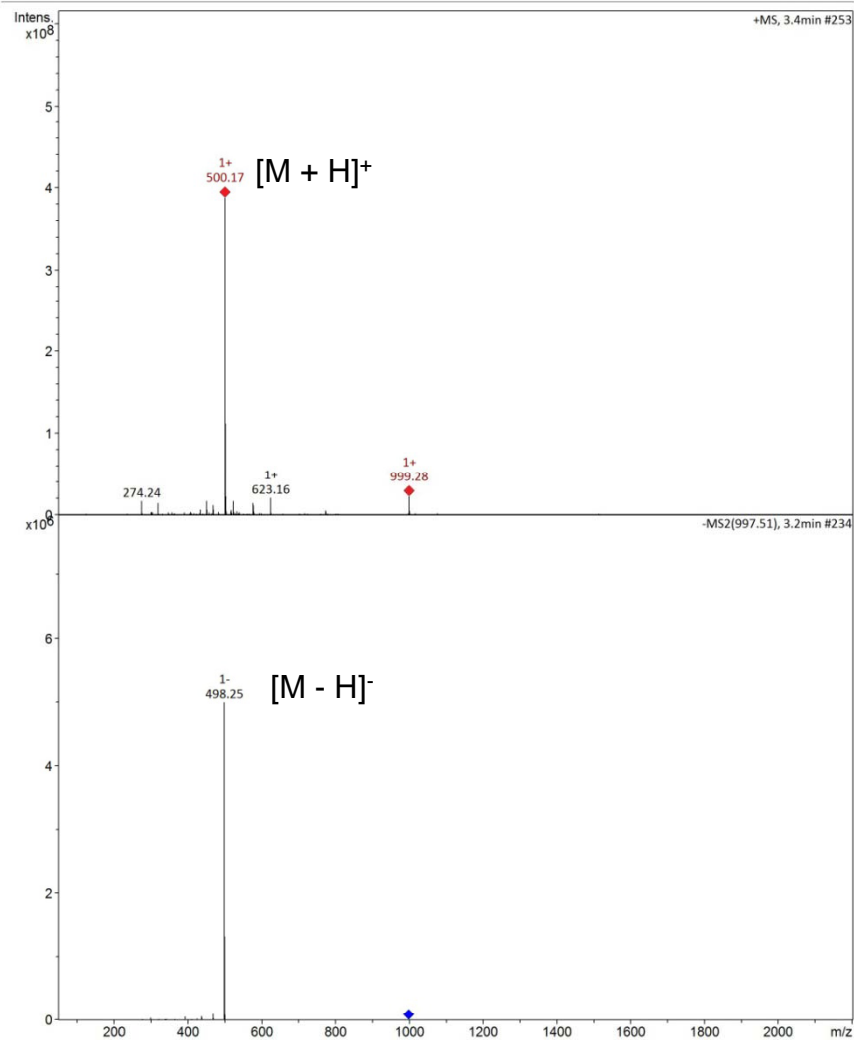

Bruker Compass DataAnalysis

S210



# <sup>1</sup>H NMR (400 MHz) spectrum of **10b** in (CD<sub>3</sub>)<sub>2</sub>CO

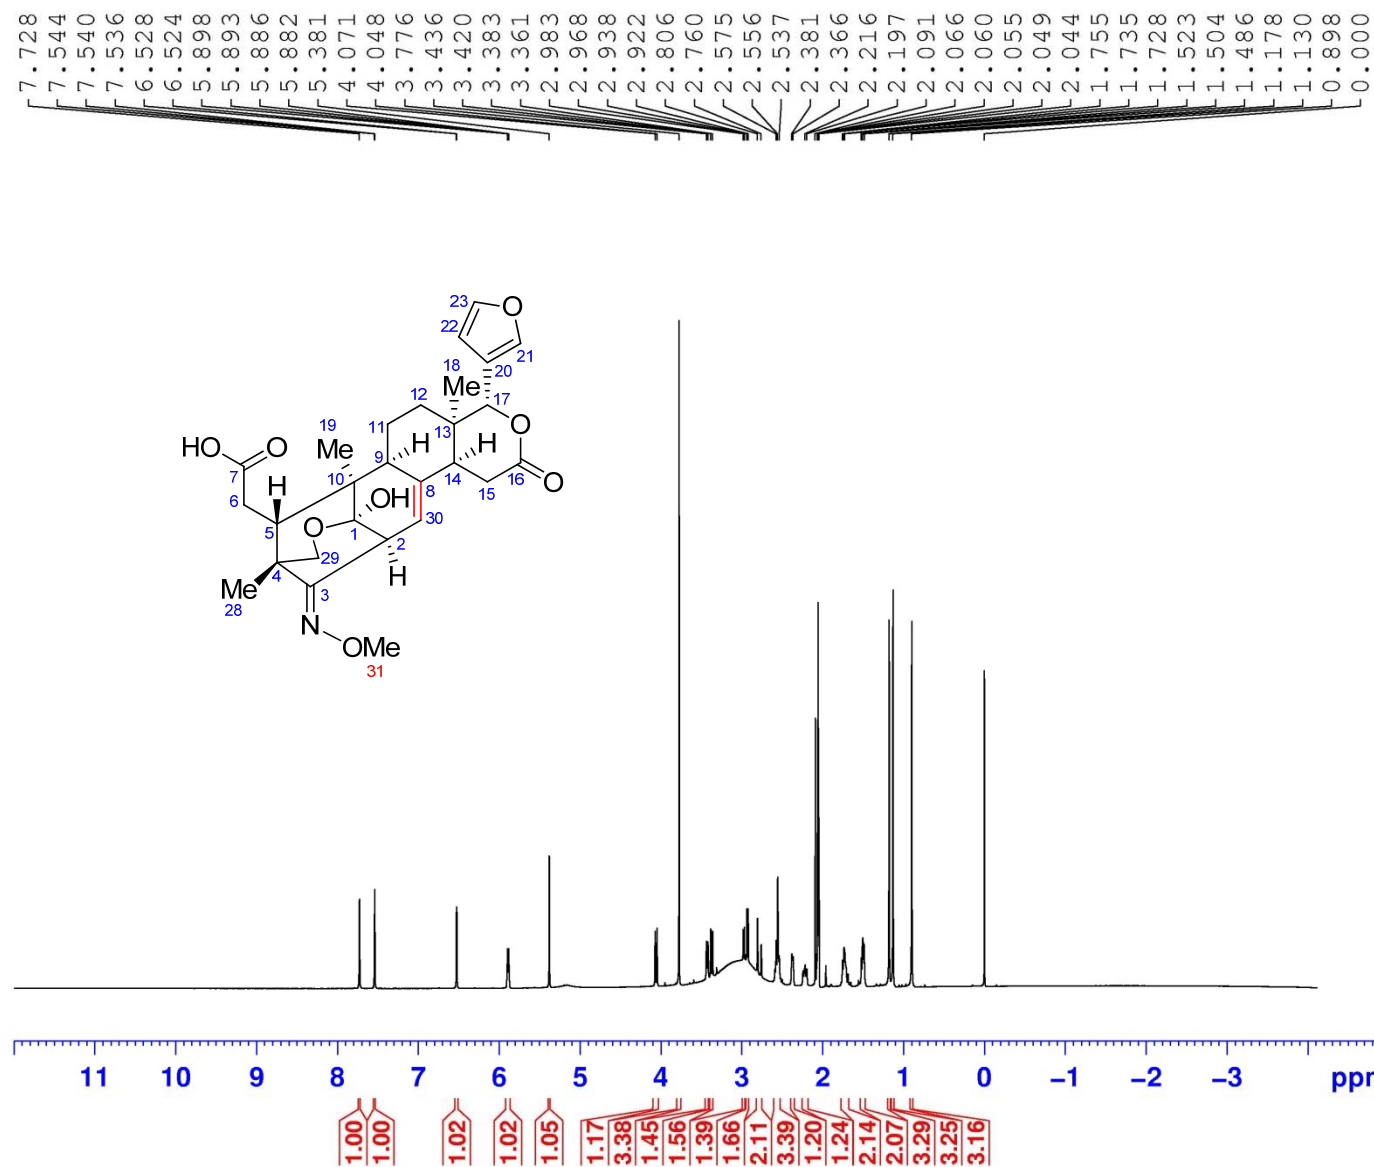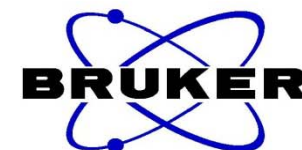

```

NAME      czc-1-IBX-jiaayang
EXPNO     1
PROCNO    1
Date_     20170706
Time      23.25
INSTRUM   spect
PROBHD    5 mm CPPBBO BB
PULPROG   zg30
TD        65536
SOLVENT   Acetone
NS        16
DS        2
SWH       8223.685 Hz
FIDRES    0.125483 Hz
AQ        3.9846387 sec
RG        208.5
DW        60.800 usec
DE        10.00 usec
TE        297.0 K
D1        1.00000000 sec
TD0       1

===== CHANNEL f1 =====
SF01      400.1324710 MHz
NUC1      1H
P1        11.50 usec
SI        65536
SF        400.1300049 MHz
WDW       EM
SSB       0
LB        0.30 Hz
GB        0
PC        1.00
    
```

$^1\text{H}$  NMR (400 MHz) spectrum of **10b** in  $(\text{CD}_3)_2\text{CO}$

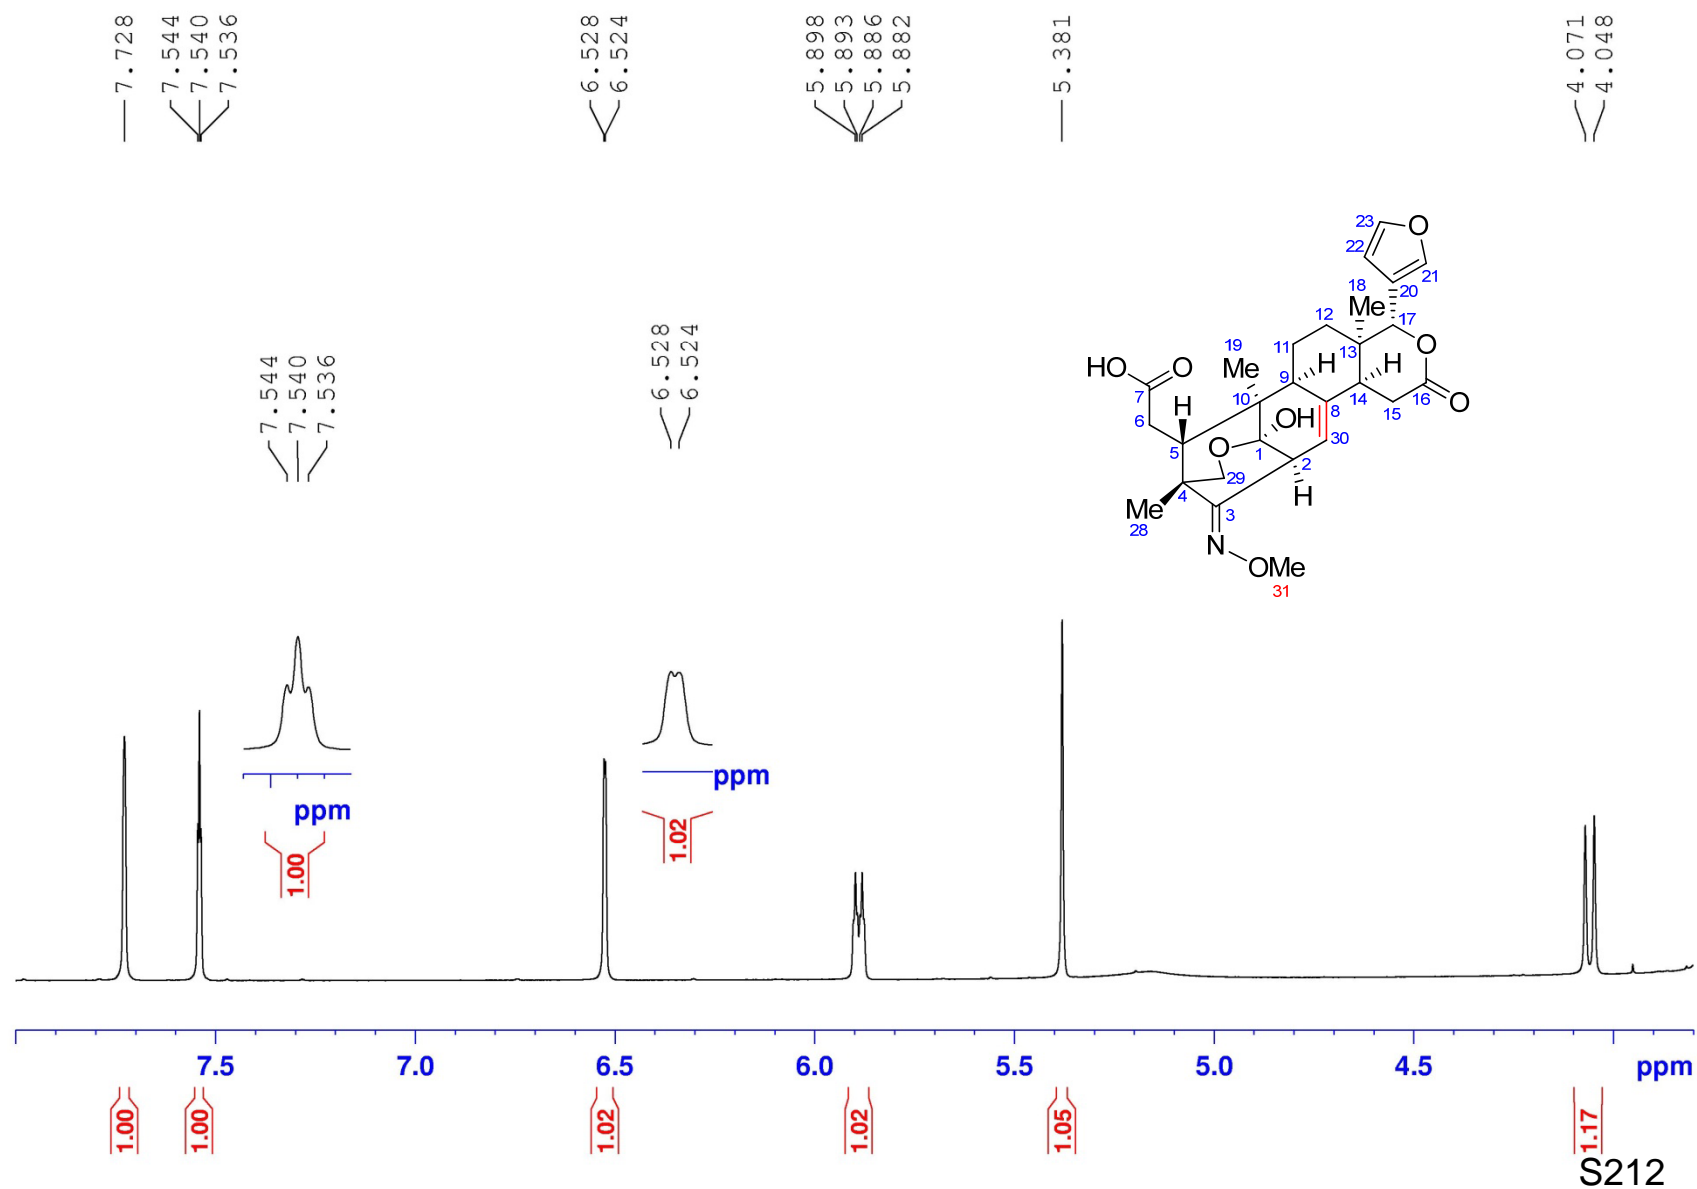

$^1\text{H}$  NMR (400 MHz) spectrum of **10b** in  $(\text{CD}_3)_2\text{CO}$

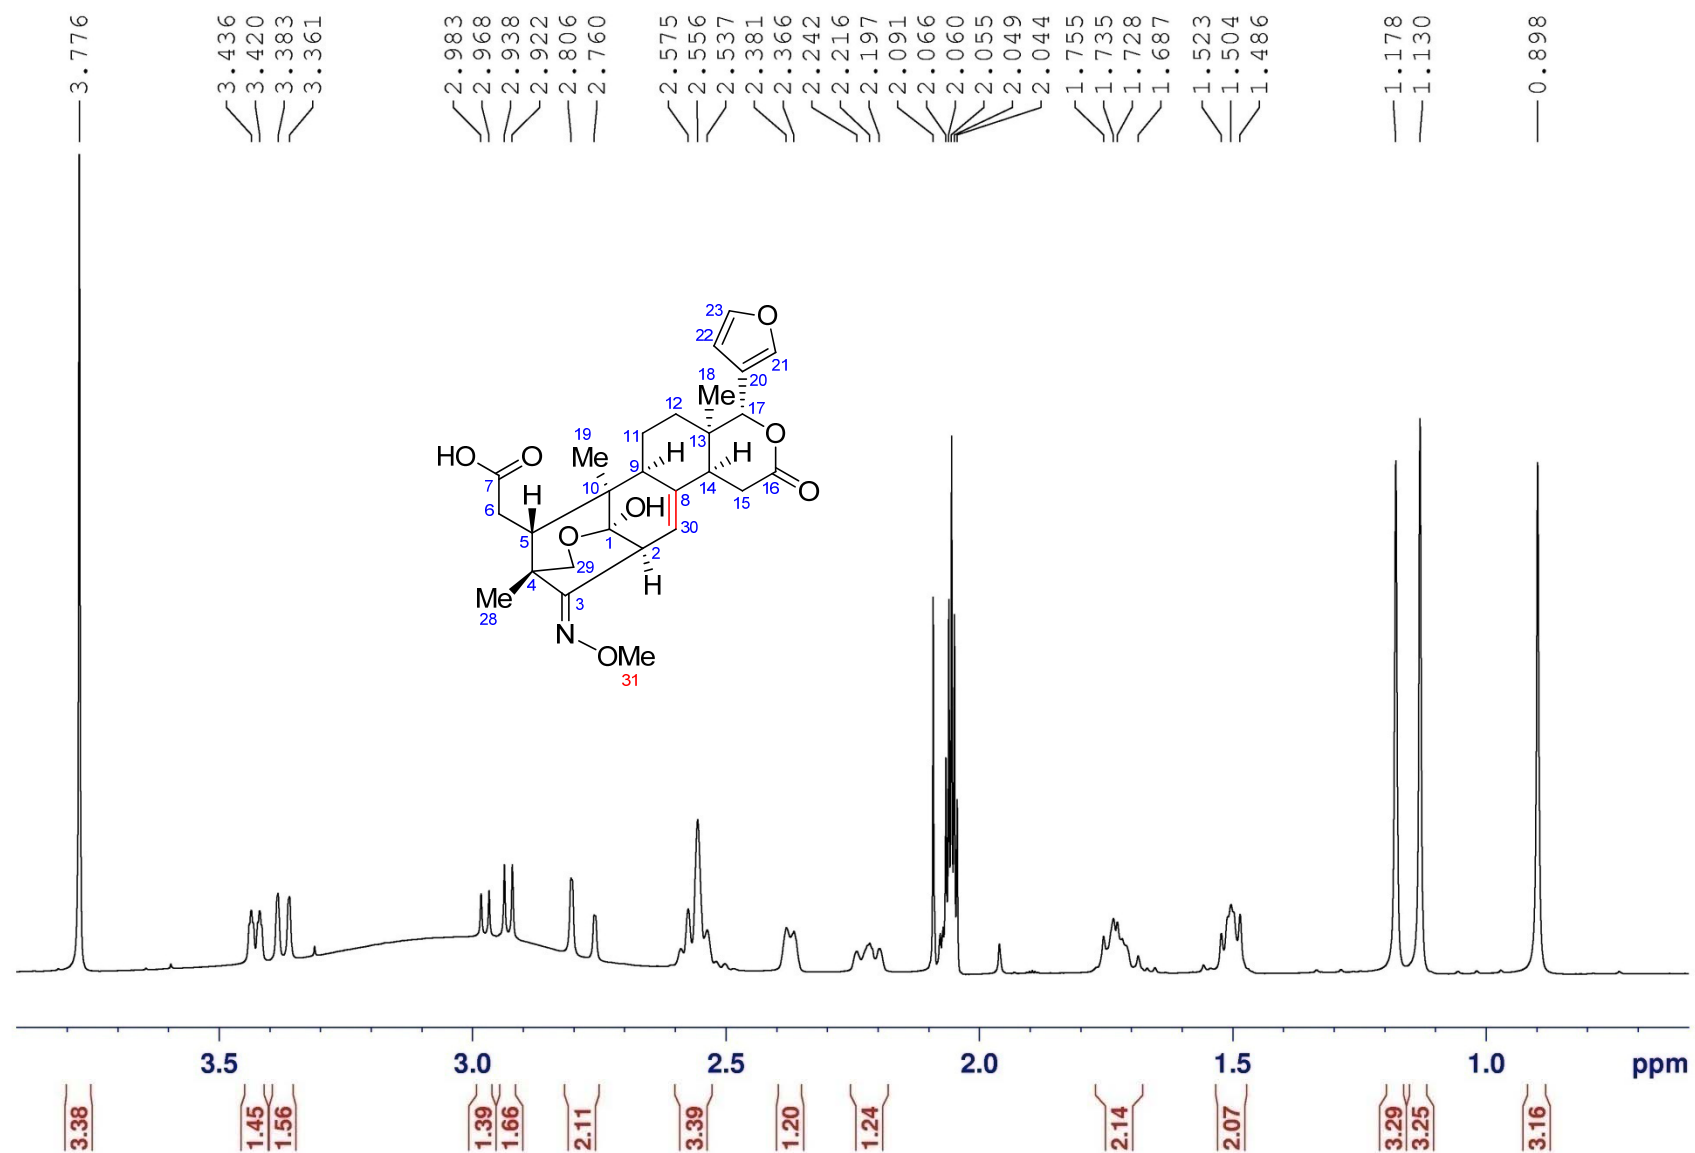

$^{13}\text{C}$  NMR (100 MHz) spectrum of **10b** in  $(\text{CD}_3)_2\text{CO}$

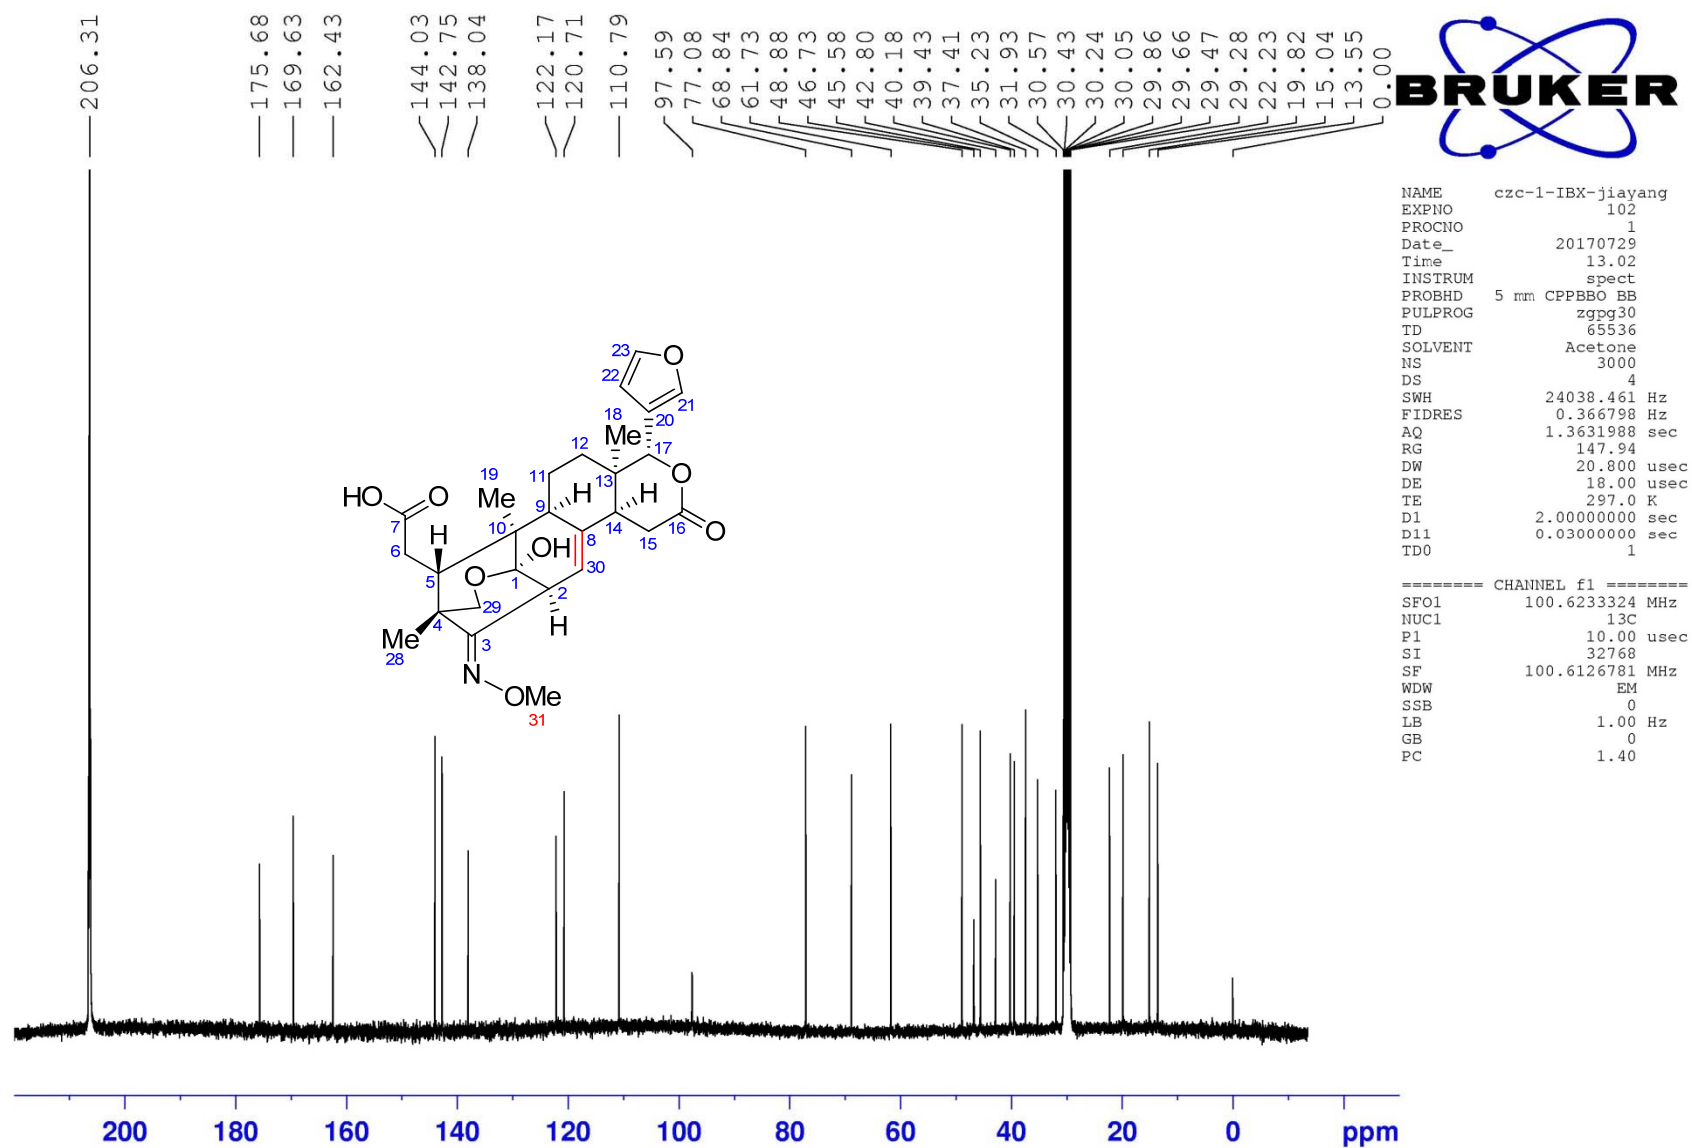

$^{13}\text{C}$  NMR (100 MHz) spectrum of **10b** in  $(\text{CD}_3)_2\text{CO}$

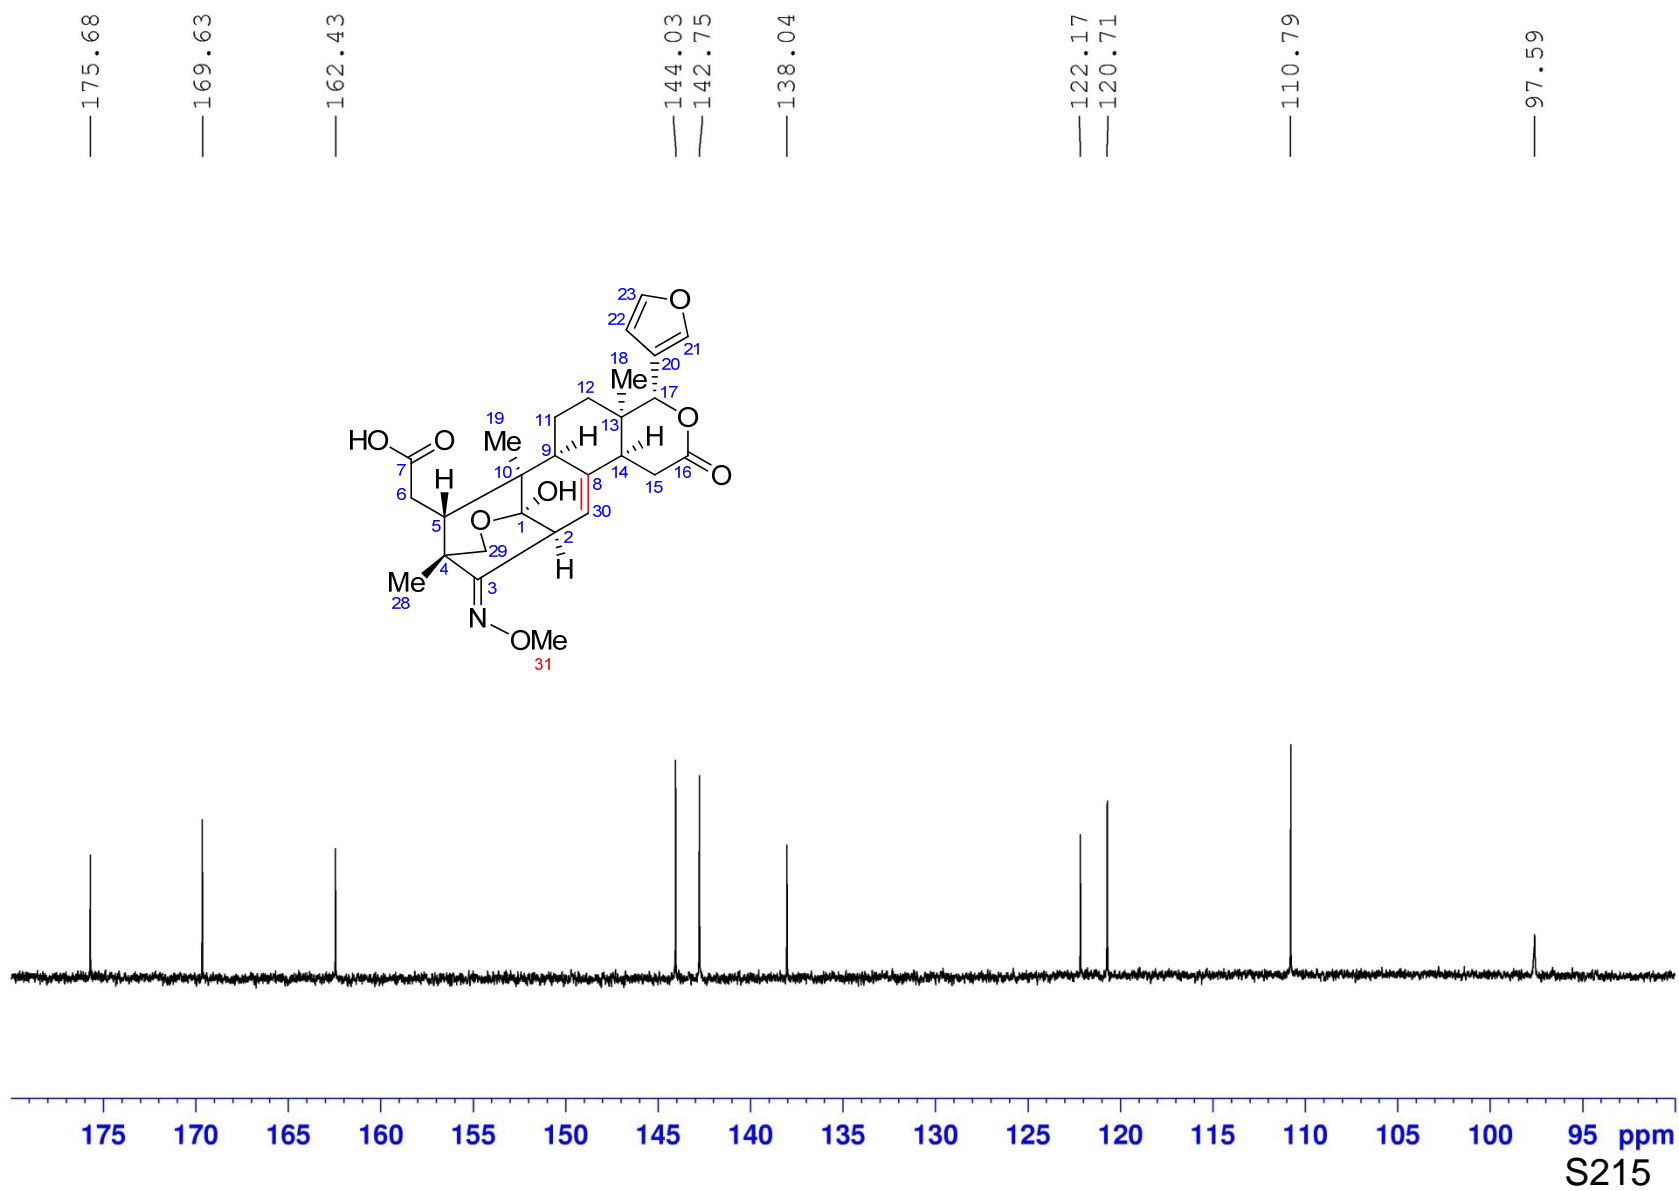

$^{13}\text{C}$  NMR (100 MHz) spectrum of **10b** in  $(\text{CD}_3)_2\text{CO}$

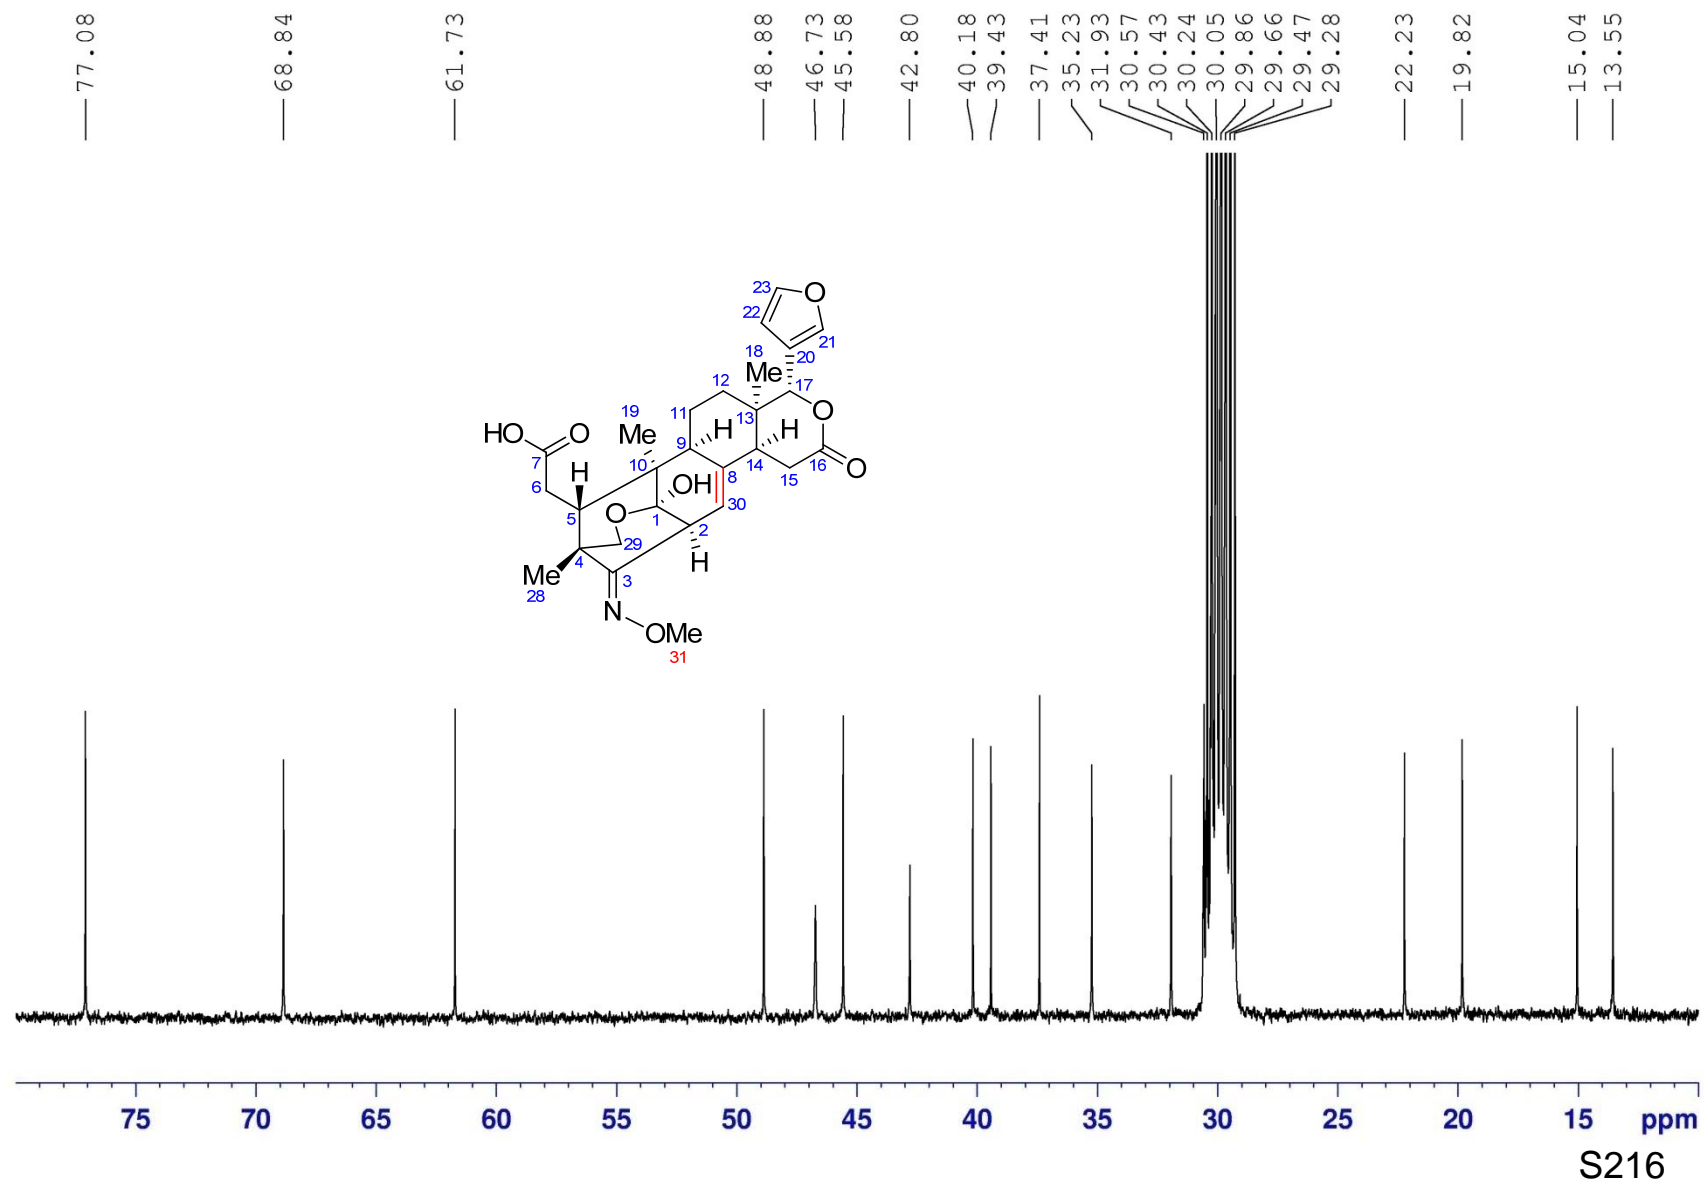

# DEPT 135 spectrum of **10b** in (CD<sub>3</sub>)<sub>2</sub>CO

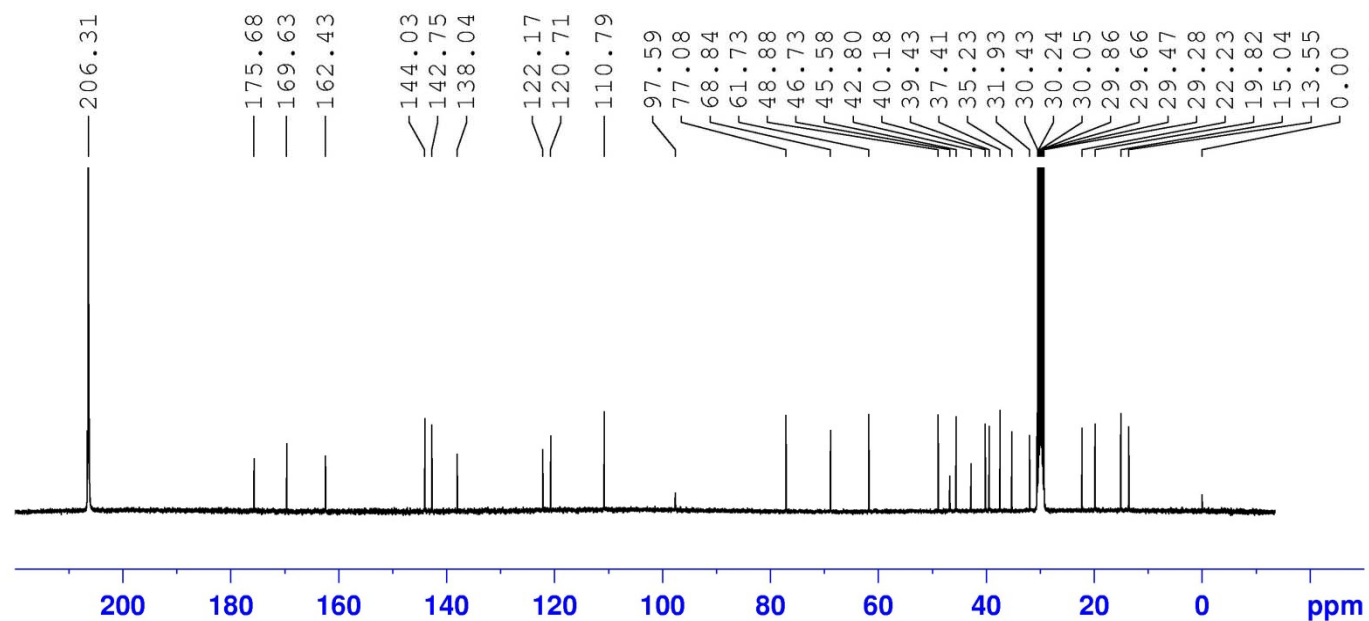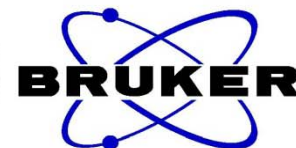

NAME czc-1-IBX-jiaayang  
EXPNO 102  
PROCNO 1  
Date\_ 20170729  
Time 13.02  
INSTRUM spect  
PROBHD 5 mm CPPBBO BB  
PULPROG zgpg30  
TD 65536  
SOLVENT Acetone  
NS 3000  
DS 4  
SWH 24038.461 Hz  
FIDRES 0.366798 Hz  
AQ 1.3631988 sec  
RG 147.94  
DW 20.800 usec  
DE 18.00 usec  
TE 297.0 K  
D1 2.00000000 sec  
D11 0.03000000 sec  
TD0 1

===== CHANNEL f1 =====  
SF01 100.6233324 MHz  
NUC1 13C  
P1 10.00 usec  
SI 32768  
SF 100.6126781 MHz  
WDW EM  
SSB 0  
LB 1.00 Hz  
GB 0  
PC 1.40

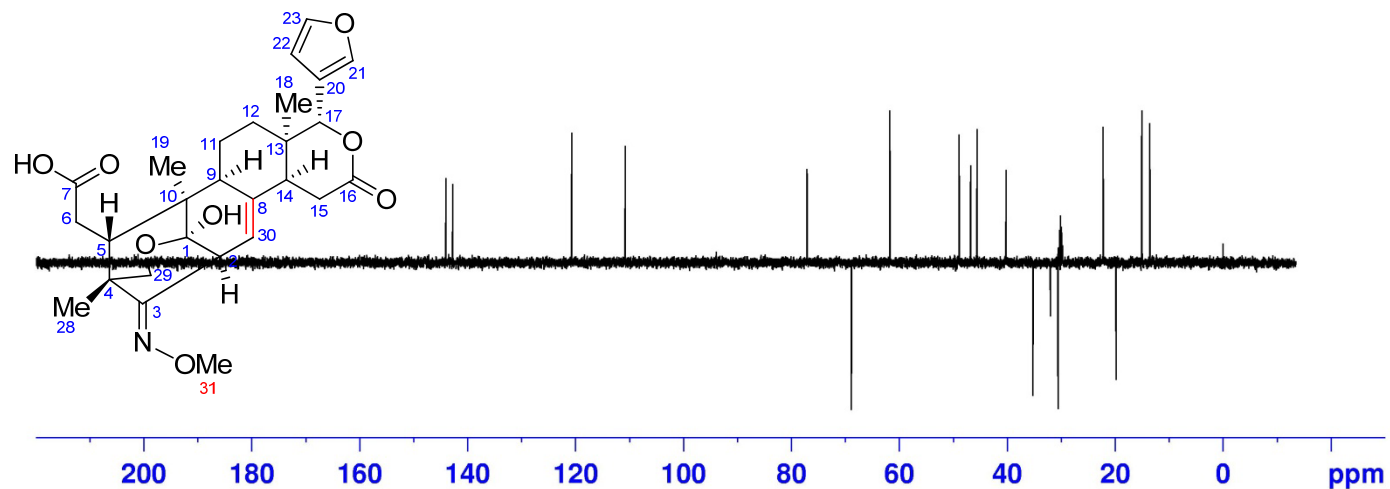

# DEPT 135 spectrum of **10b** in (CD<sub>3</sub>)<sub>2</sub>CO

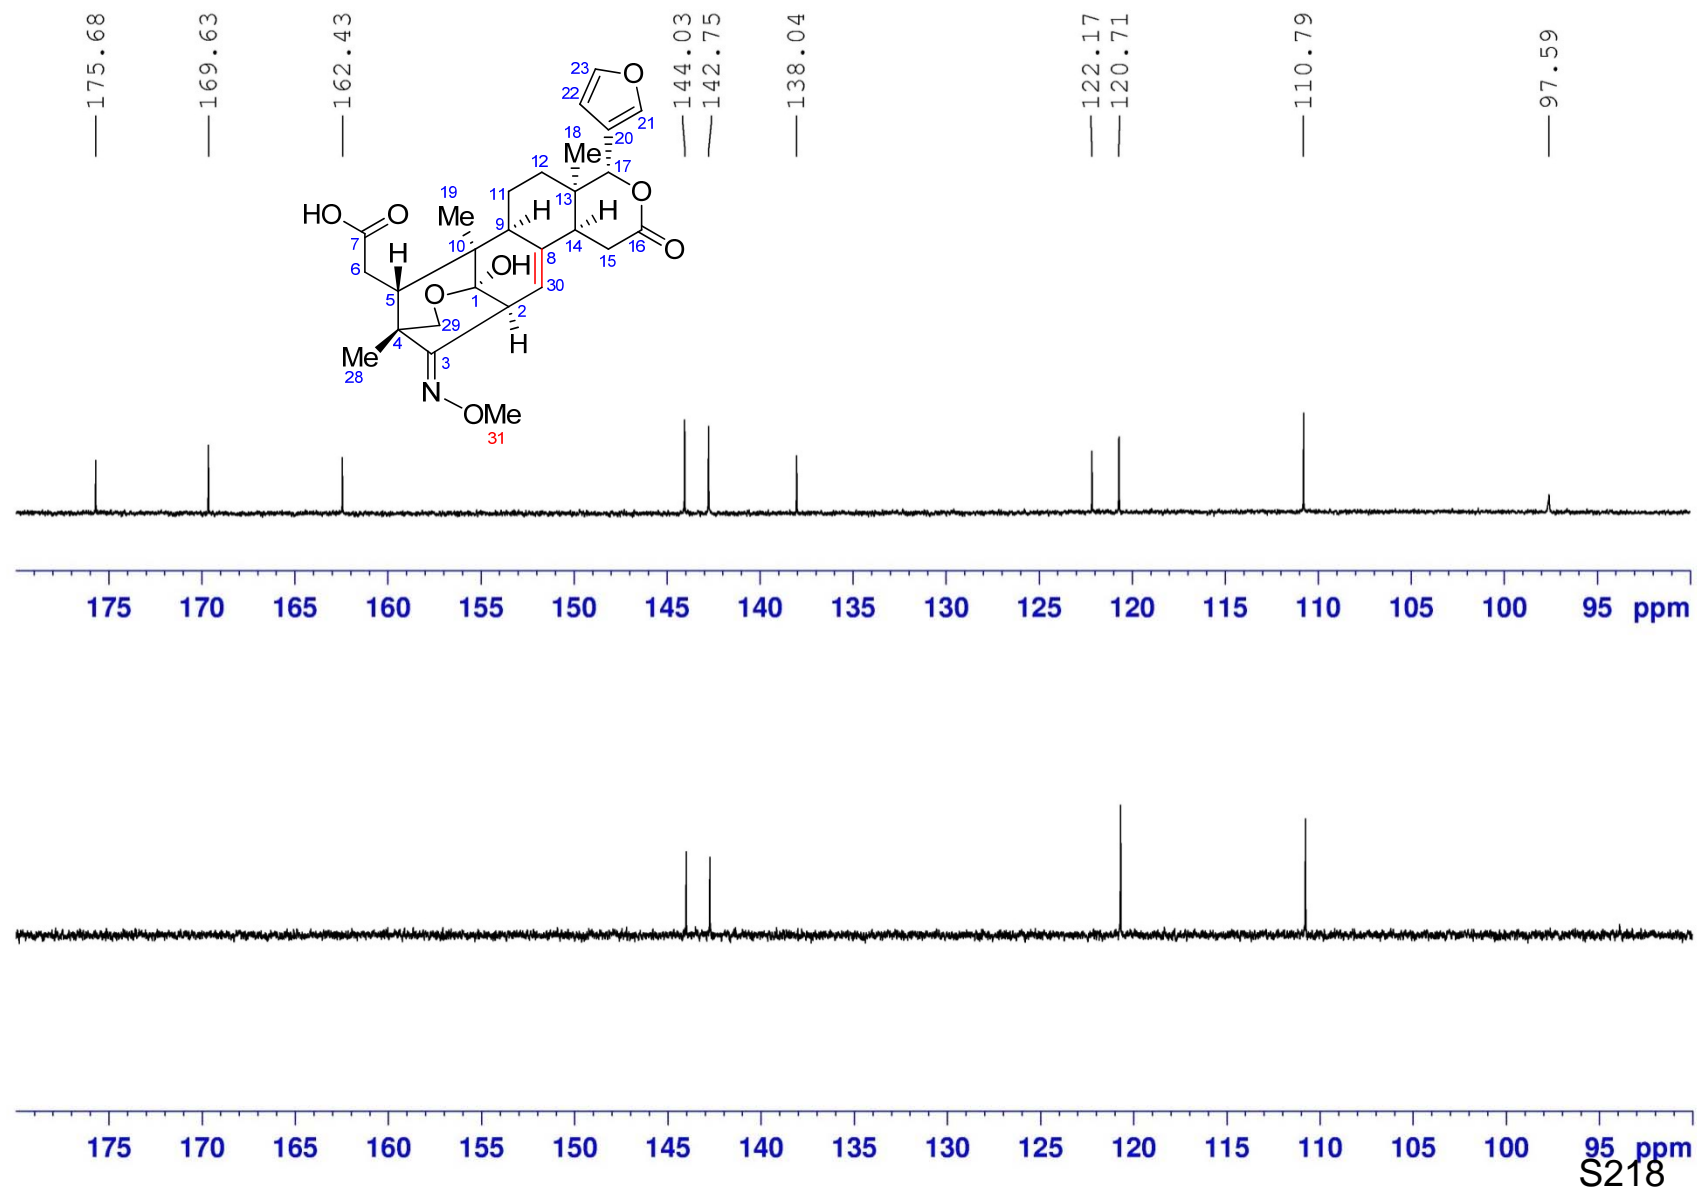



# DEPT 135 spectrum of **10b** in (CD<sub>3</sub>)<sub>2</sub>CO

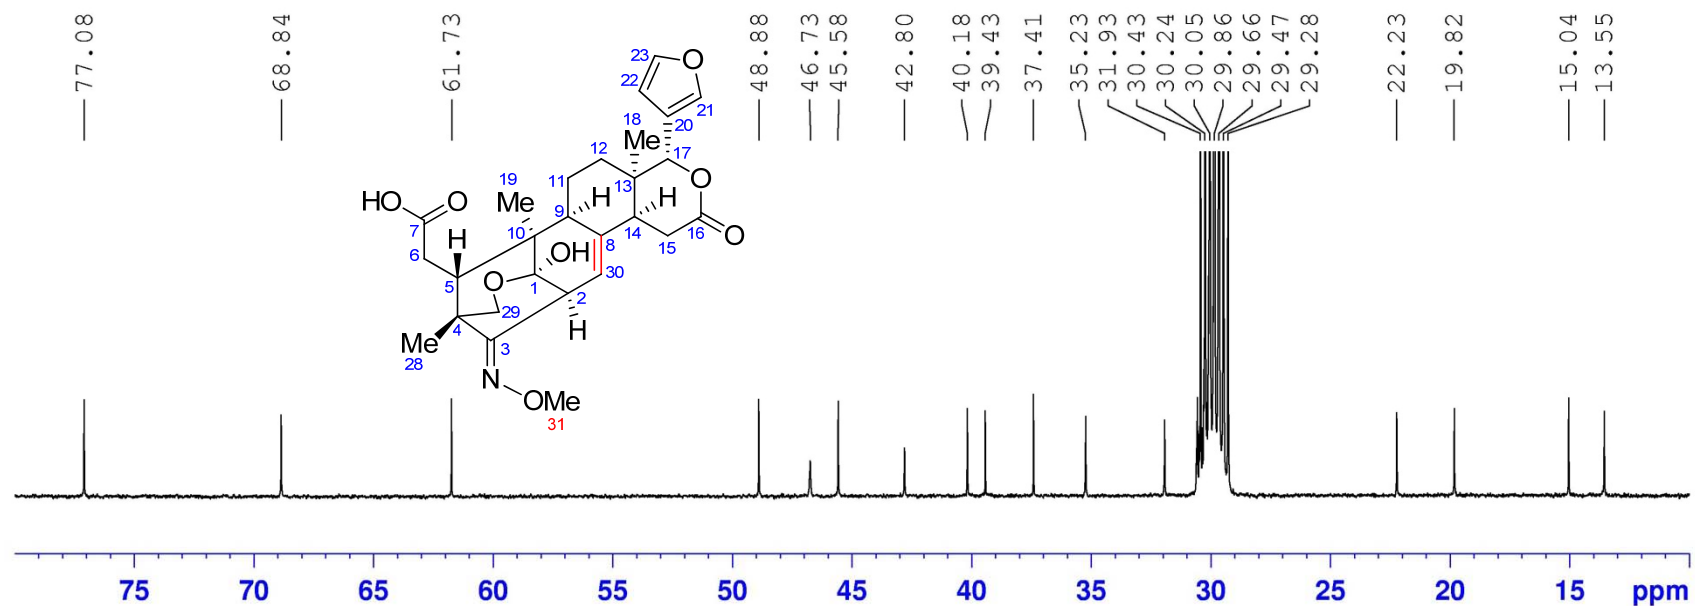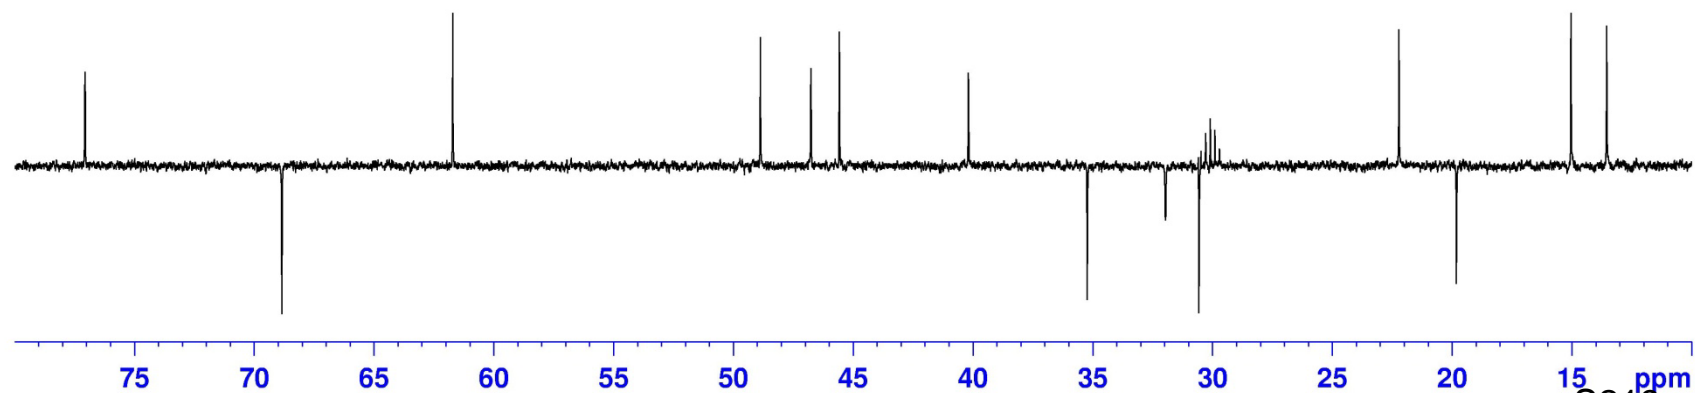

# LR-ESIMS for compound **10c**

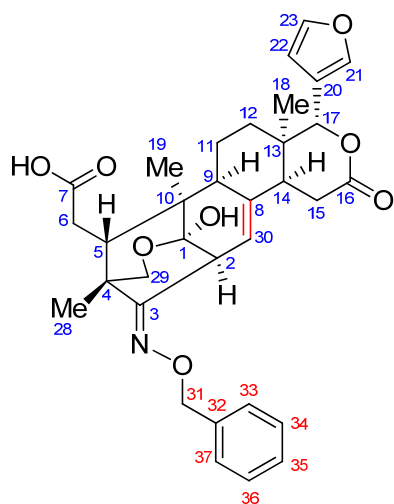

## Generic Display Report

### Analysis Info

Analysis Name: D:\MS\RJL\20181001\77\_RA1\_01\_1589.d  
Method: lc-7.9  
Sample Name: 77140922-alternating-500-50-2200-MS2\_1589.m  
Comment:

Acquisition D 2018/10/1 18:25:28

Operator: bruker  
Instrument: amaZon SL

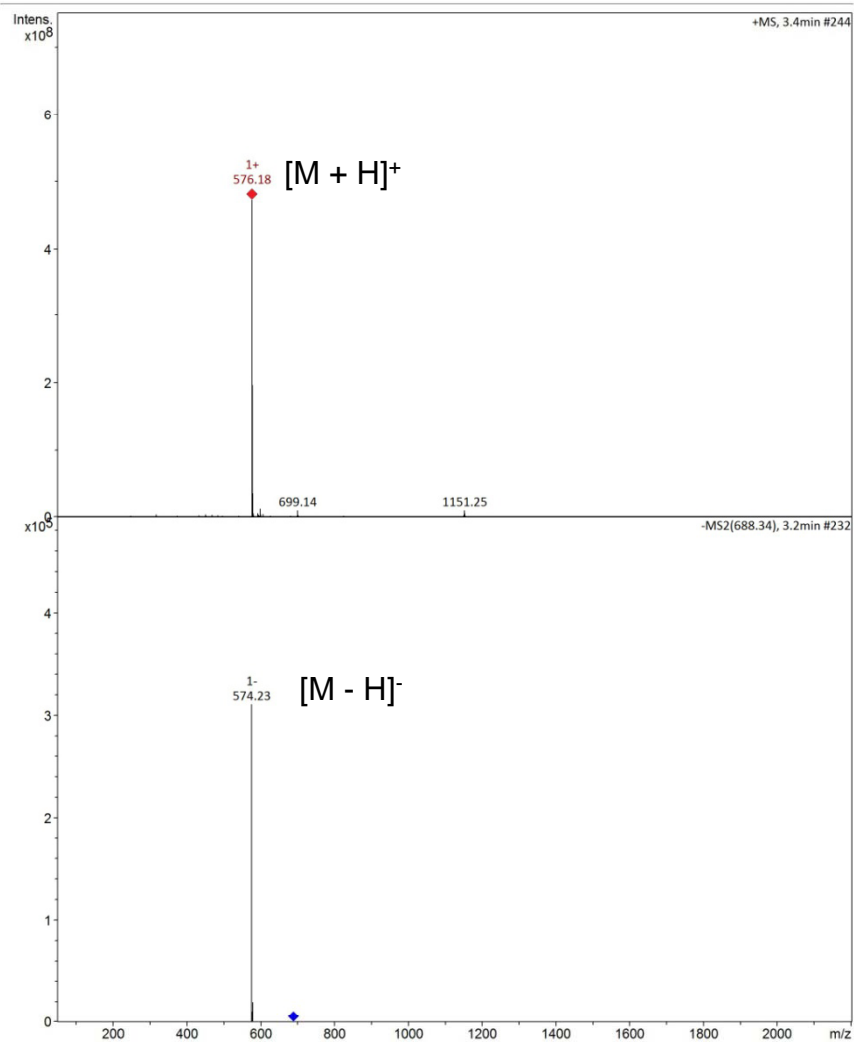

Bruker Compass DataAnalysis

# <sup>1</sup>H NMR (400 MHz) spectrum of **10c** in (CD<sub>3</sub>)<sub>2</sub>CO

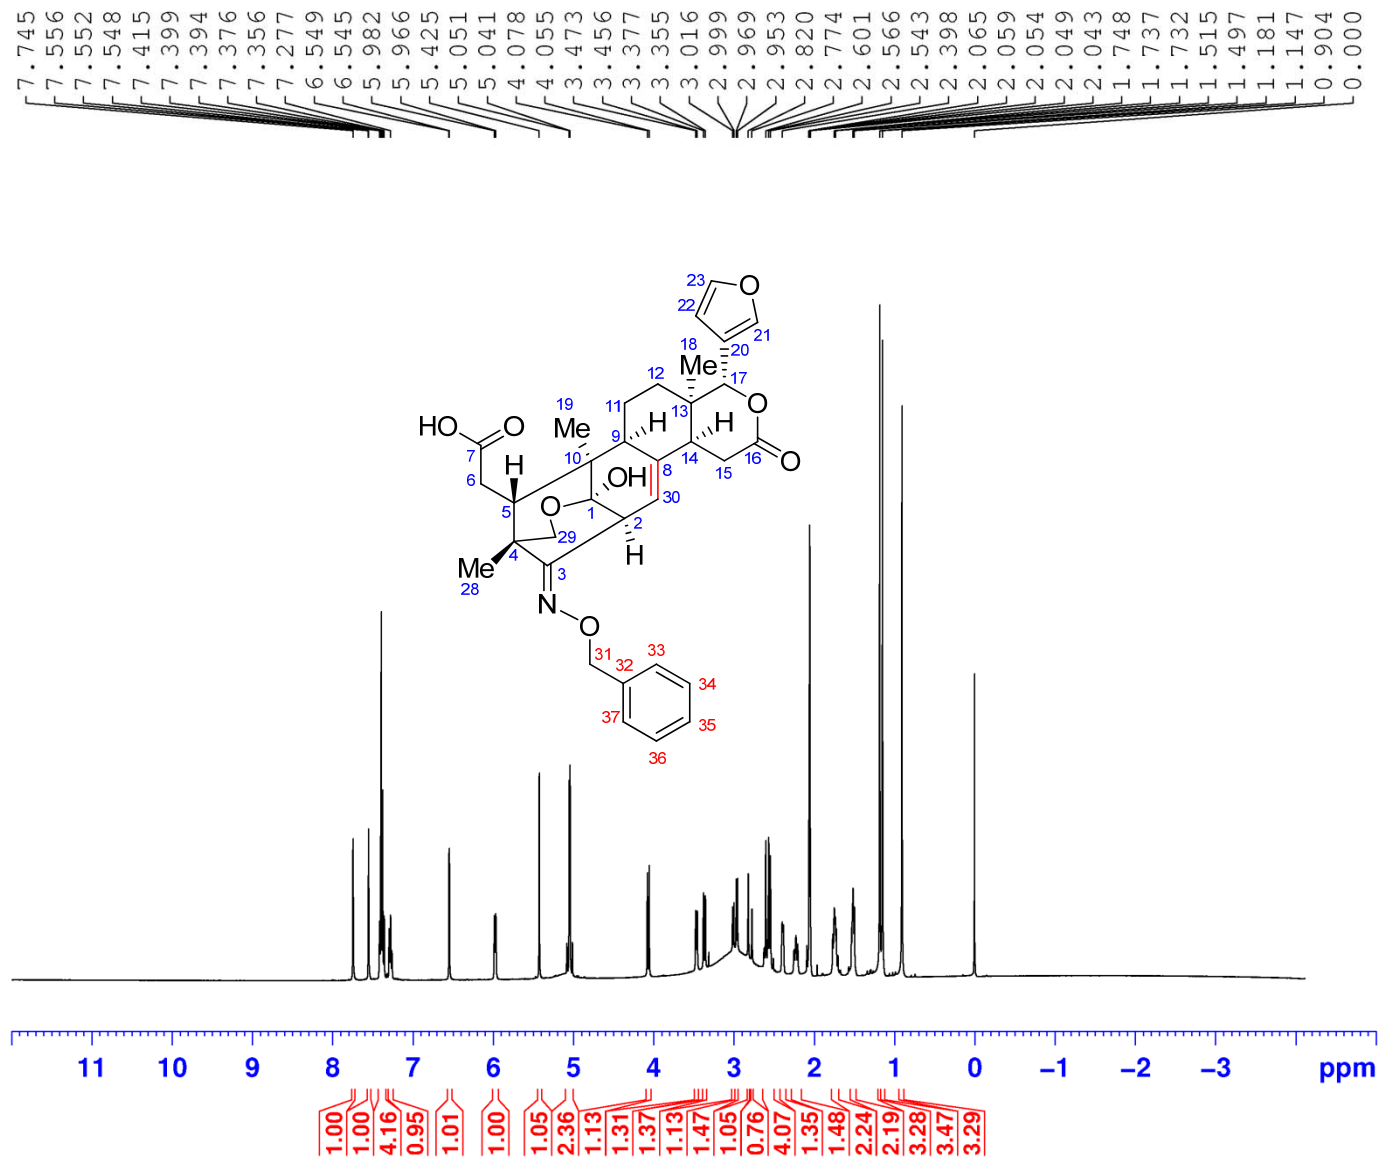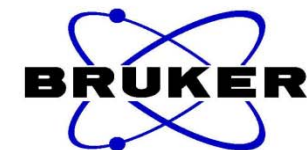

```

NAME      czc-1-ibx-linbianjiqiang
EXPNO     1
PROCNO    1
Date_     20170709
Time      18.45
INSTRUM   spect
PROBHD    5 mm CPPBBO BB
PULPROG   zg30
TD        65536
SOLVENT   Acetone
NS        16
DS        2
SWH       8223.685 Hz
FIDRES    0.125483 Hz
AQ        3.9846387 sec
RG        208.5
DW        60.800 usec
DE        10.00 usec
TE        297.0 K
D1        1.00000000 sec
TD0       1

===== CHANNEL f1 =====
SFO1      400.1324710 MHz
NUC1      1H
P1        11.50 usec
SI        65536
SF        400.1300053 MHz
WDW       EM
SSB       0
LB        0.30 Hz
GB        0
PC        1.00
    
```

$^1\text{H}$  NMR (400 MHz) spectrum of **10c** in  $(\text{CD}_3)_2\text{CO}$

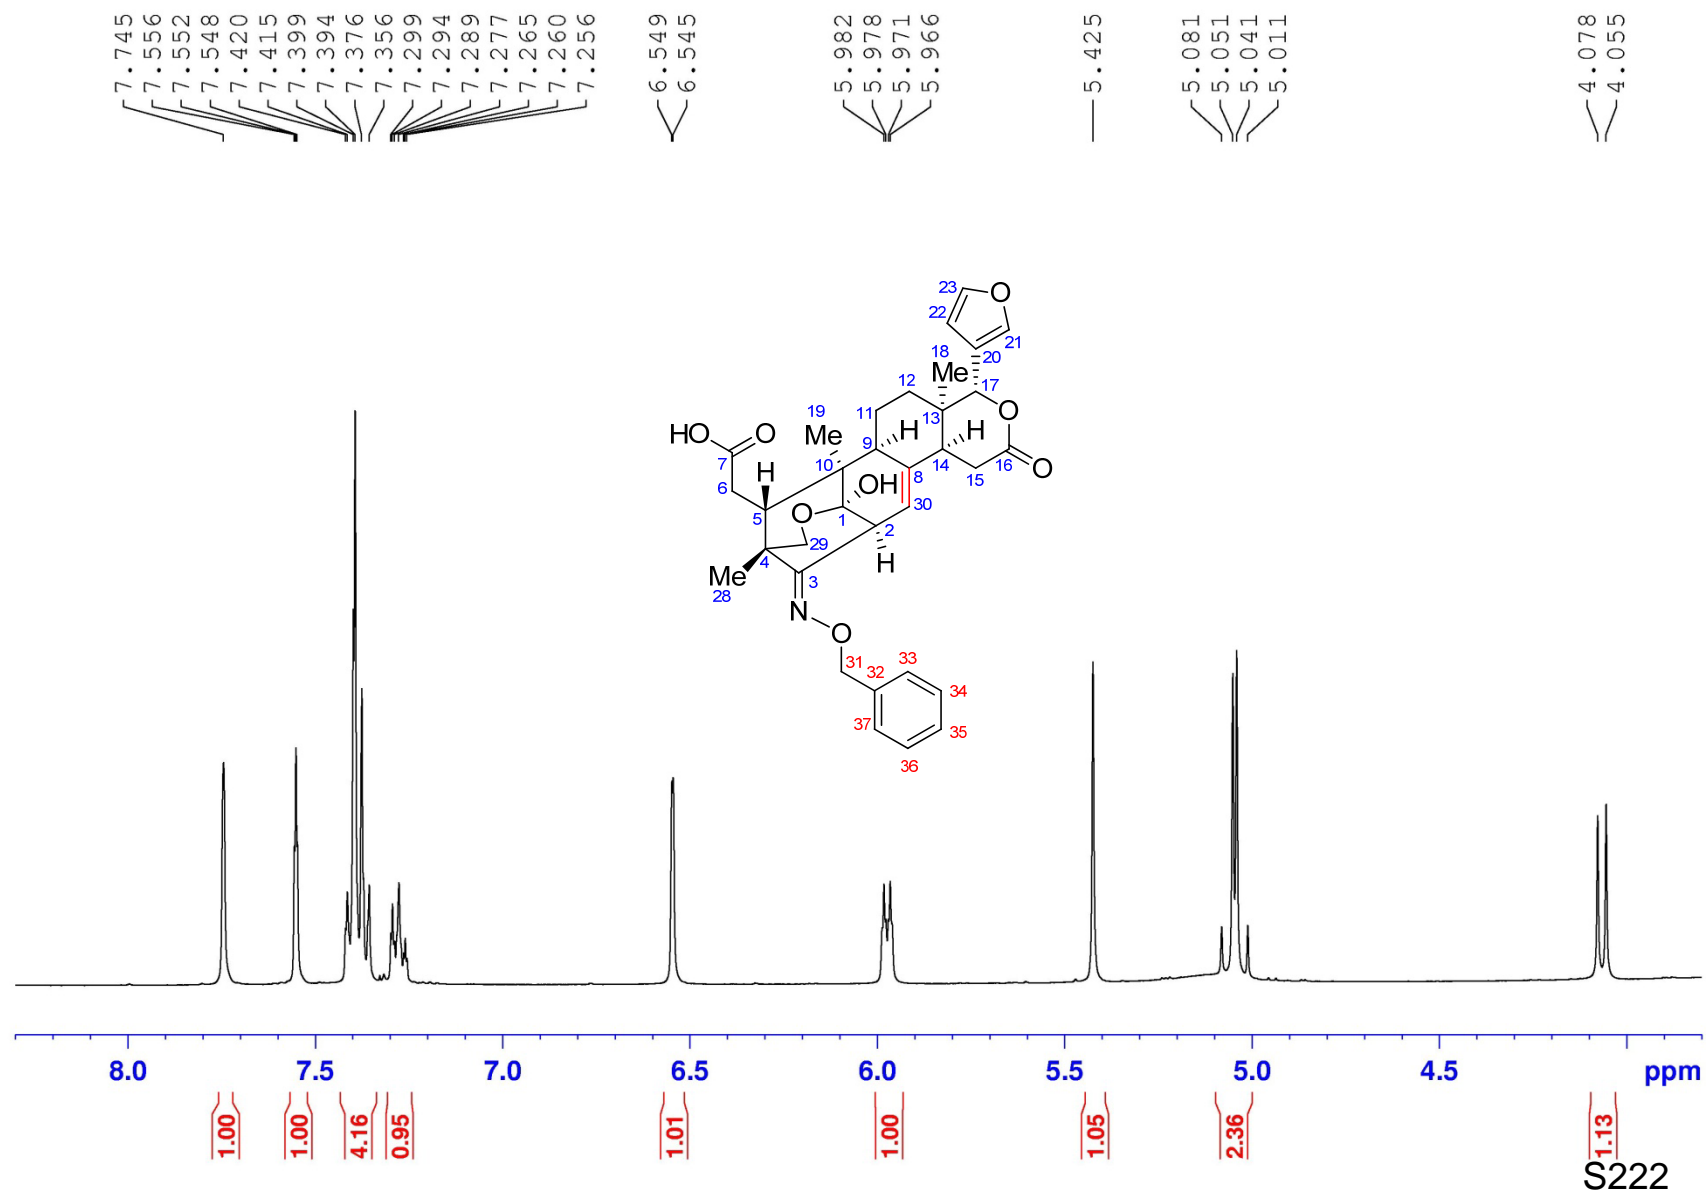

$^1\text{H}$  NMR (400 MHz) spectrum of **10c** in  $(\text{CD}_3)_2\text{CO}$

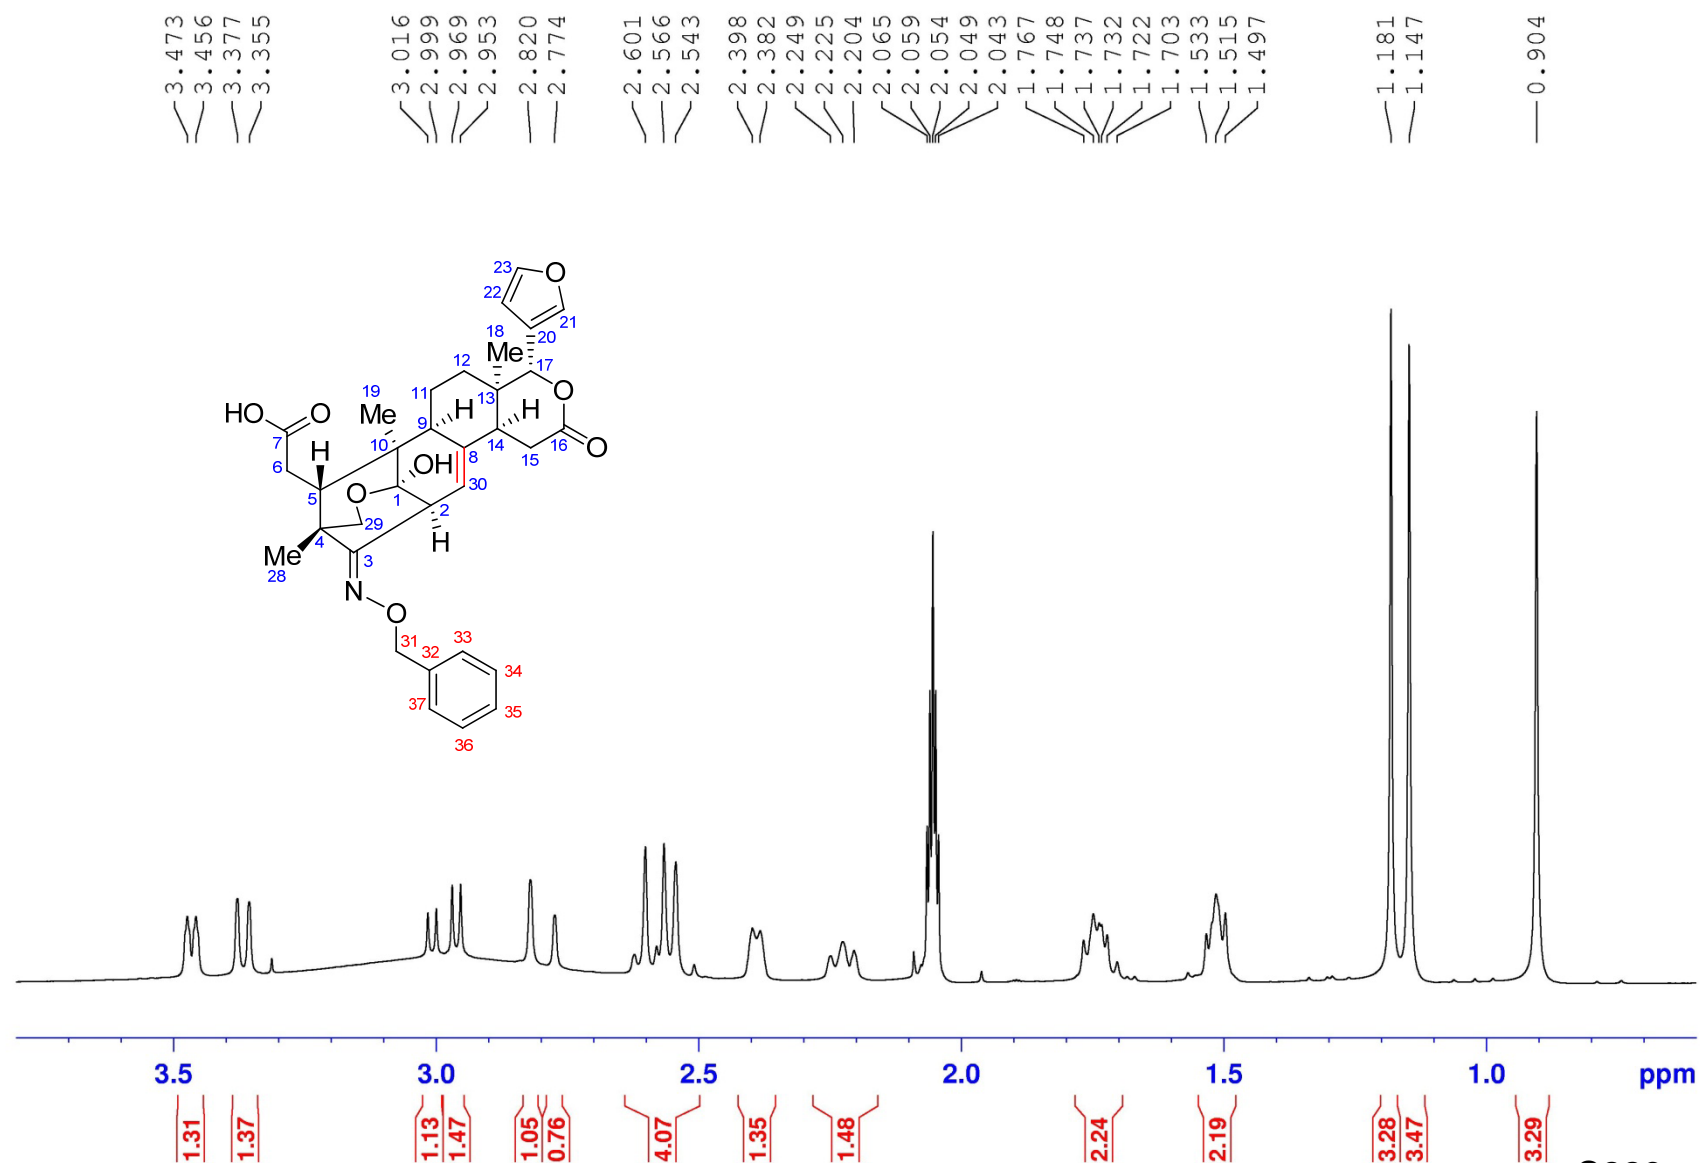

$^{13}\text{C}$  NMR (100 MHz) spectrum of **10c** in  $(\text{CD}_3)_2\text{CO}$

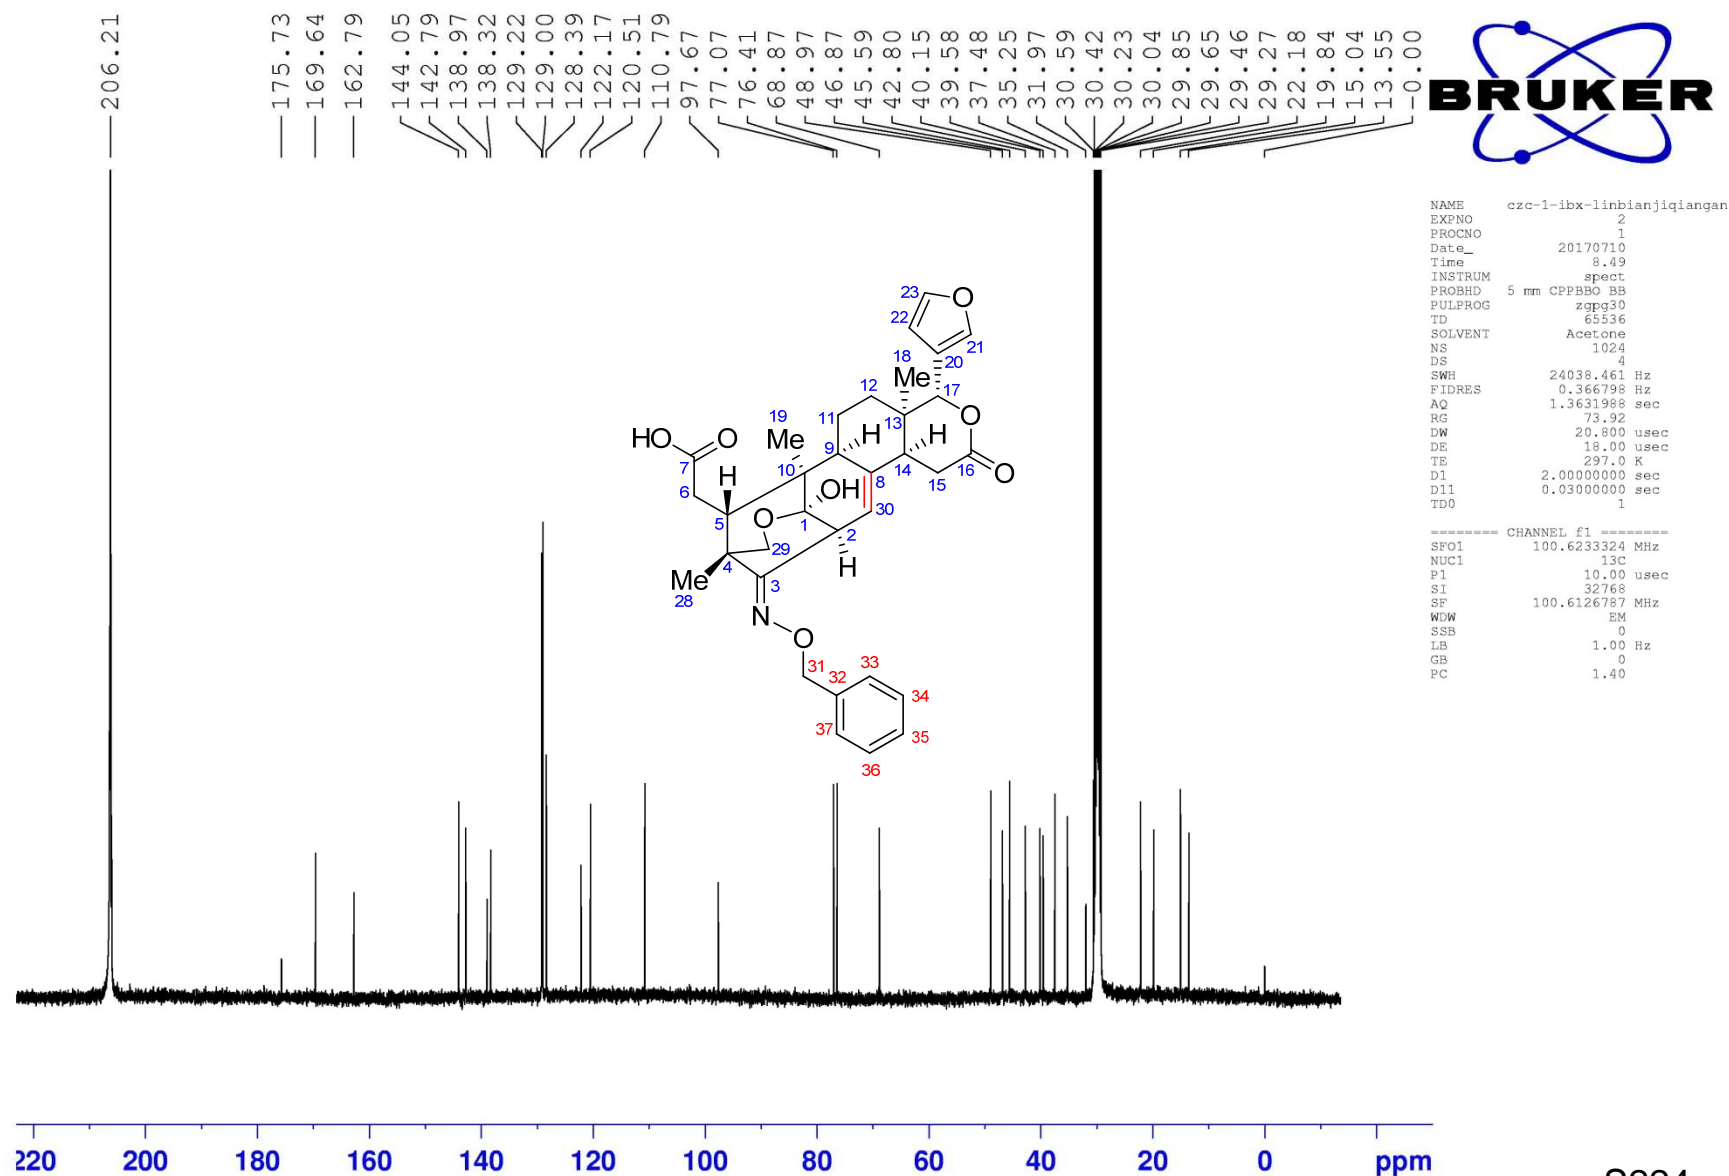

$^{13}\text{C}$  NMR (100 MHz) spectrum of **10c** in  $(\text{CD}_3)_2\text{CO}$

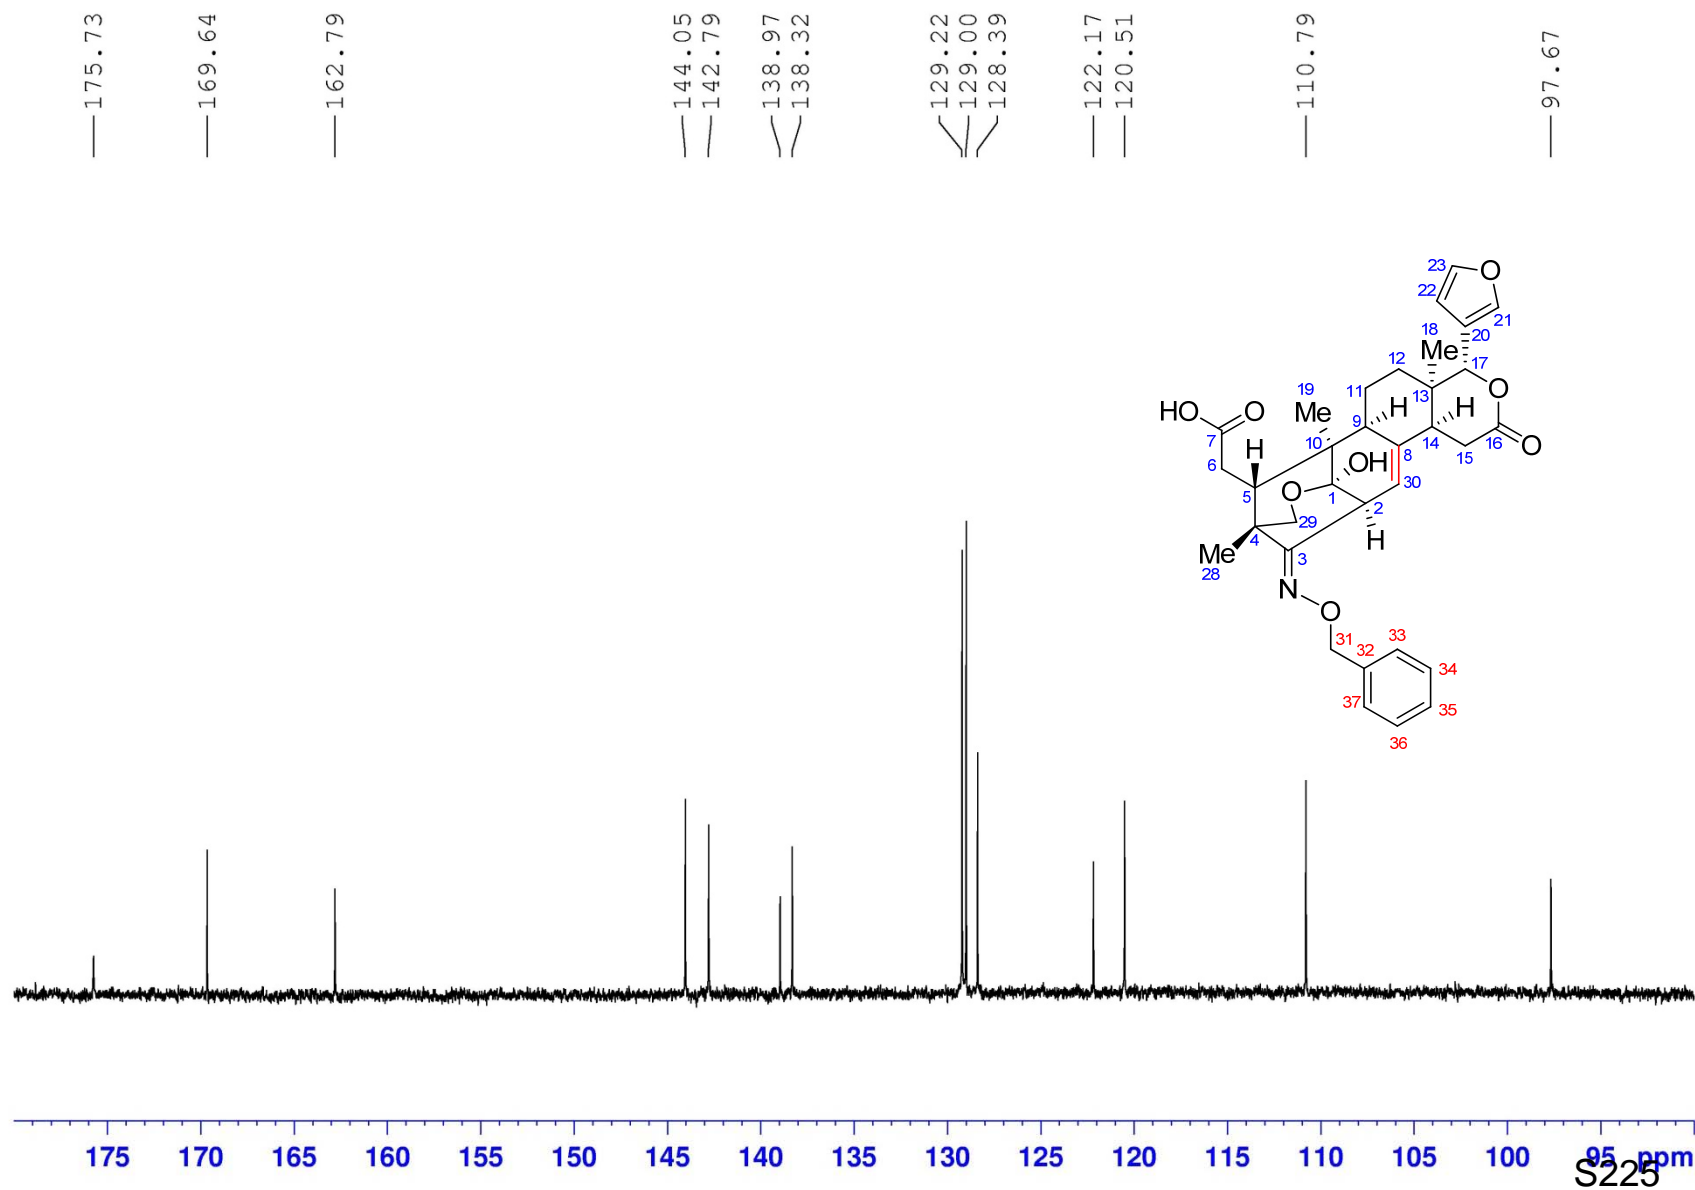

$^{13}\text{C}$  NMR (100 MHz) spectrum of **10c** in  $(\text{CD}_3)_2\text{CO}$

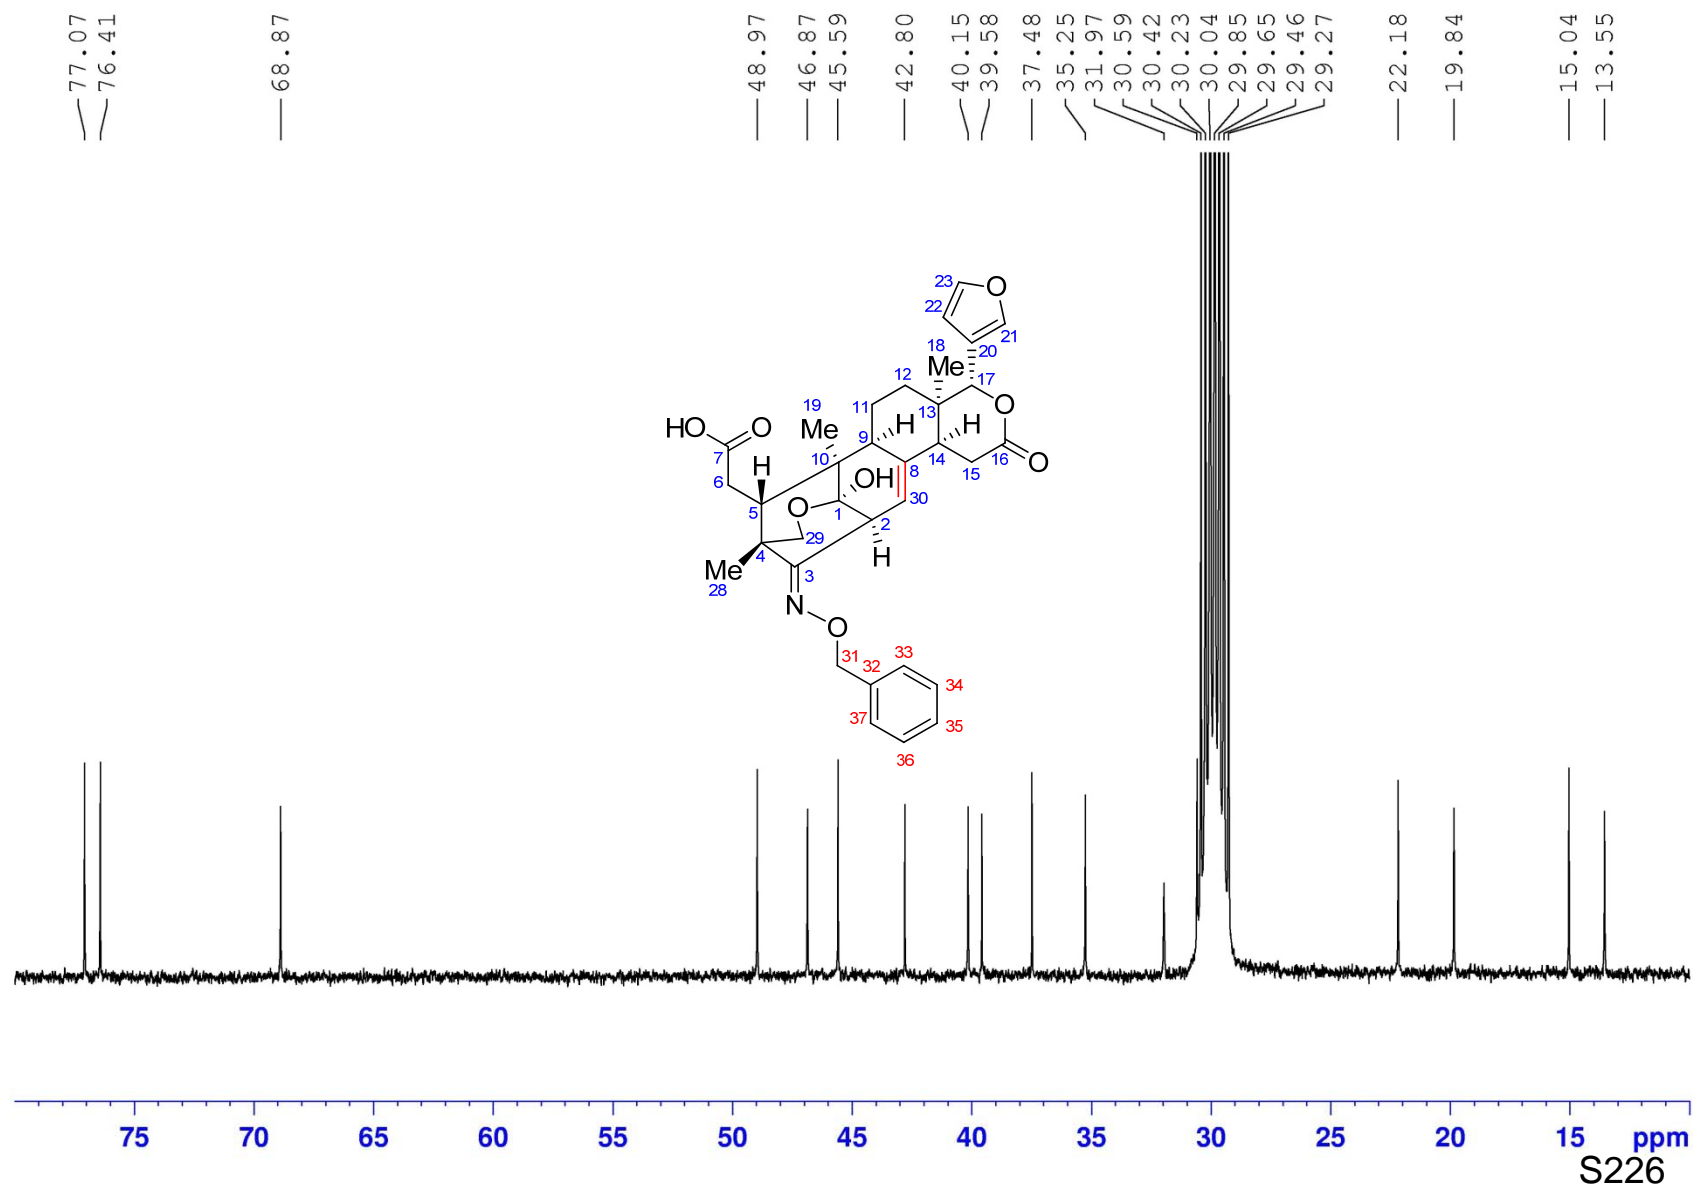



# DEPT 135 spectrum of **10c** in (CD<sub>3</sub>)<sub>2</sub>CO

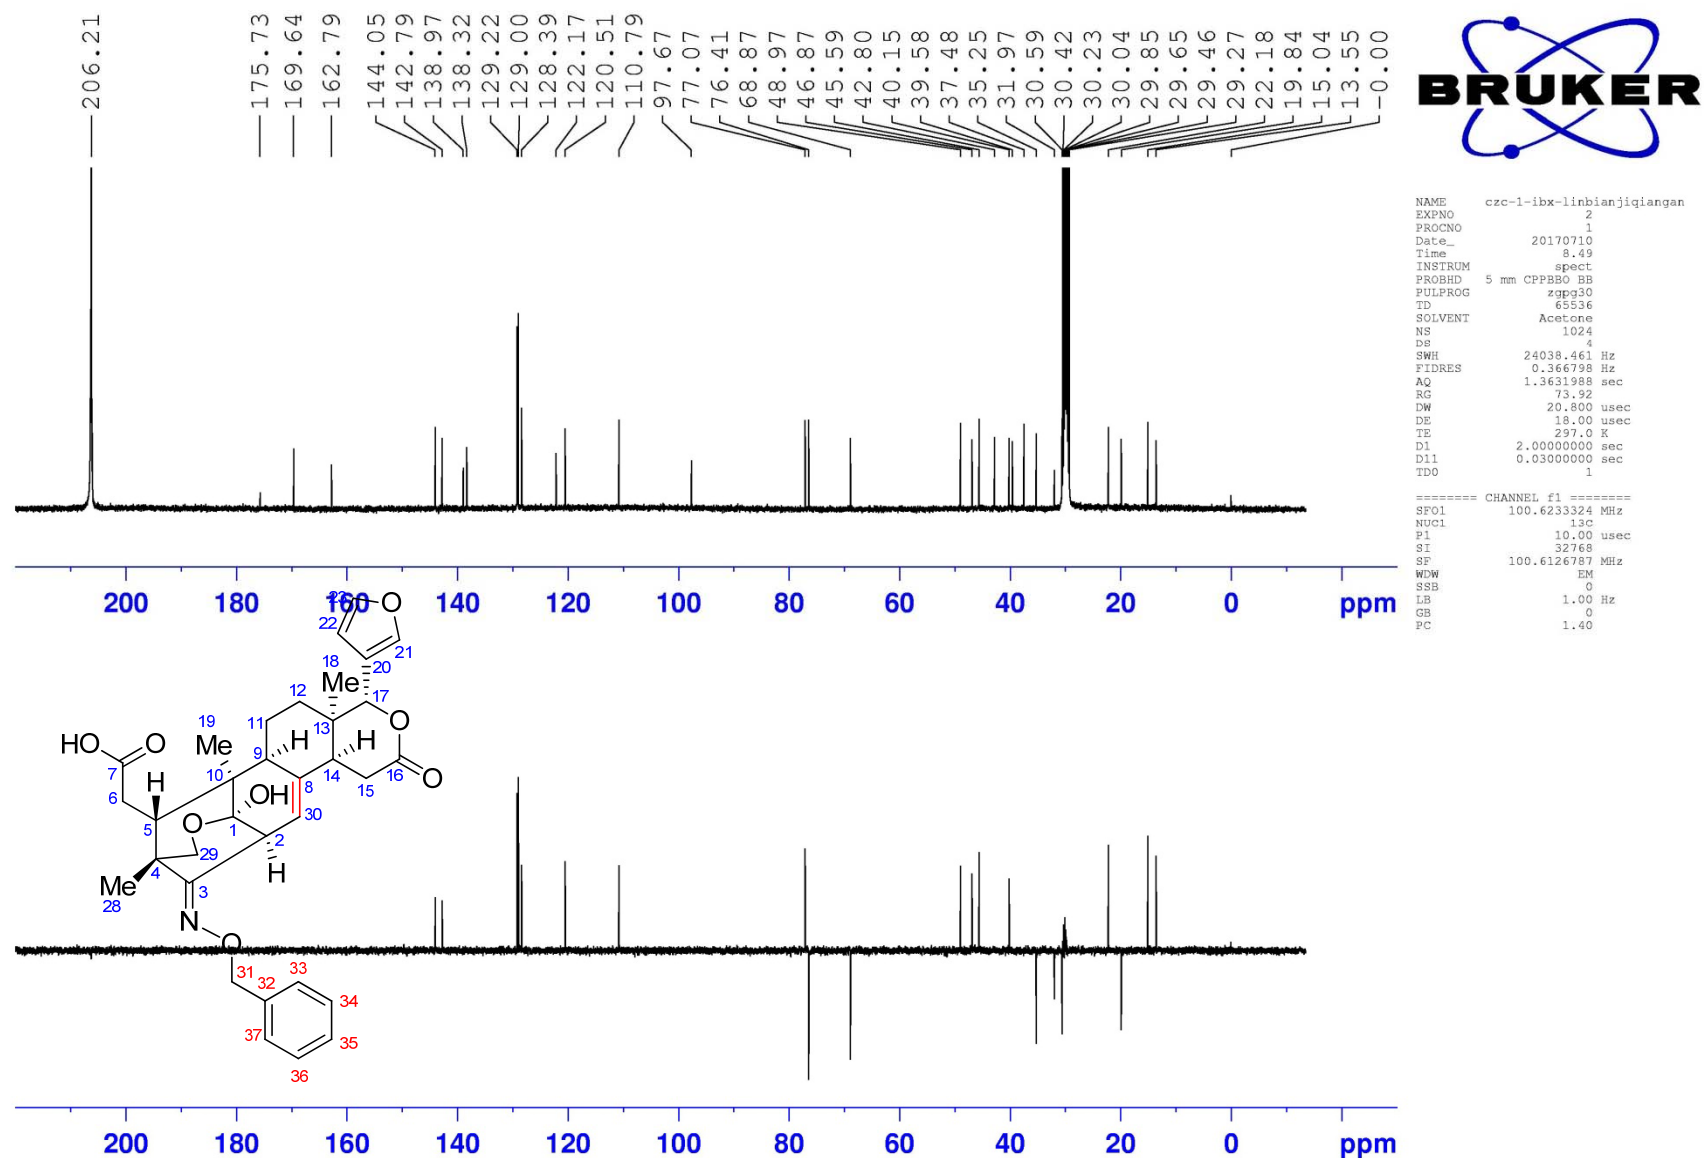

# DEPT 135 spectrum of **10c** in (CD<sub>3</sub>)<sub>2</sub>CO

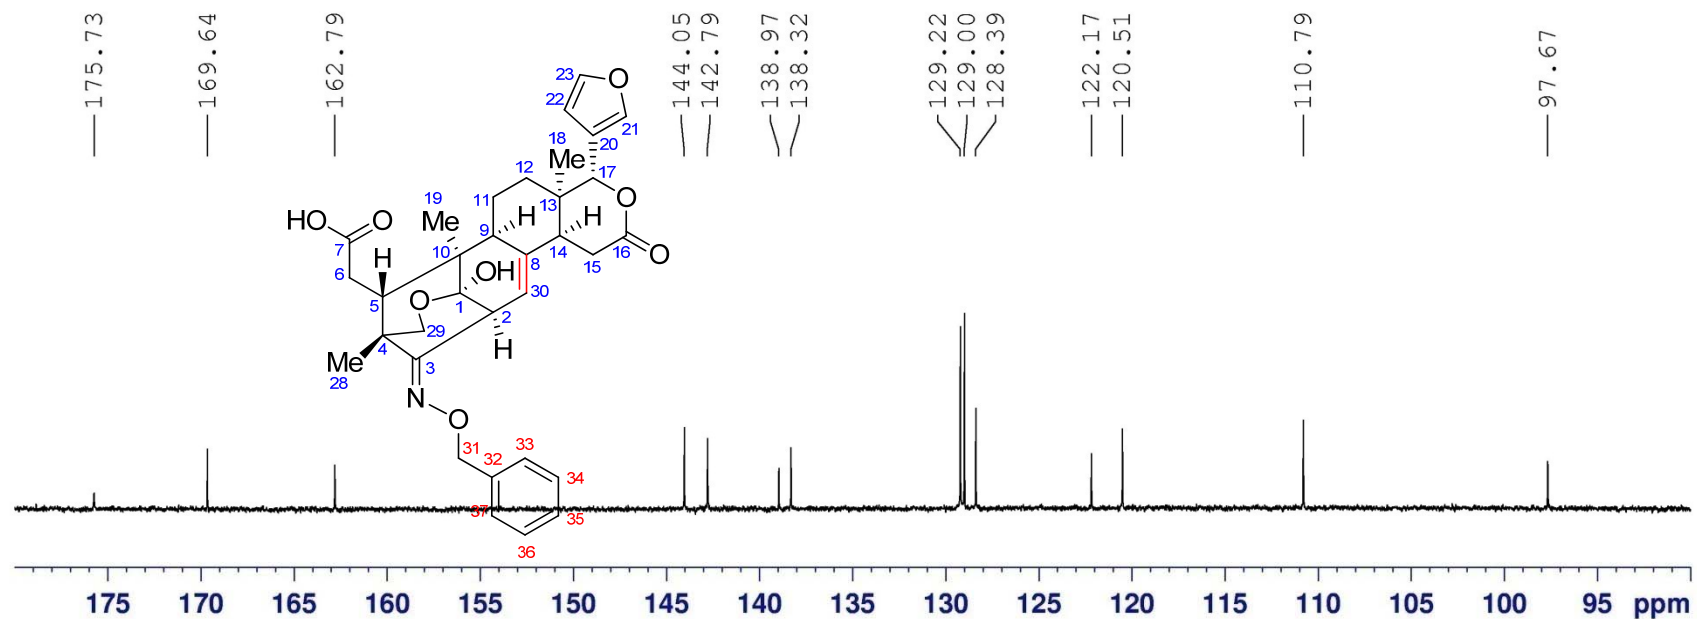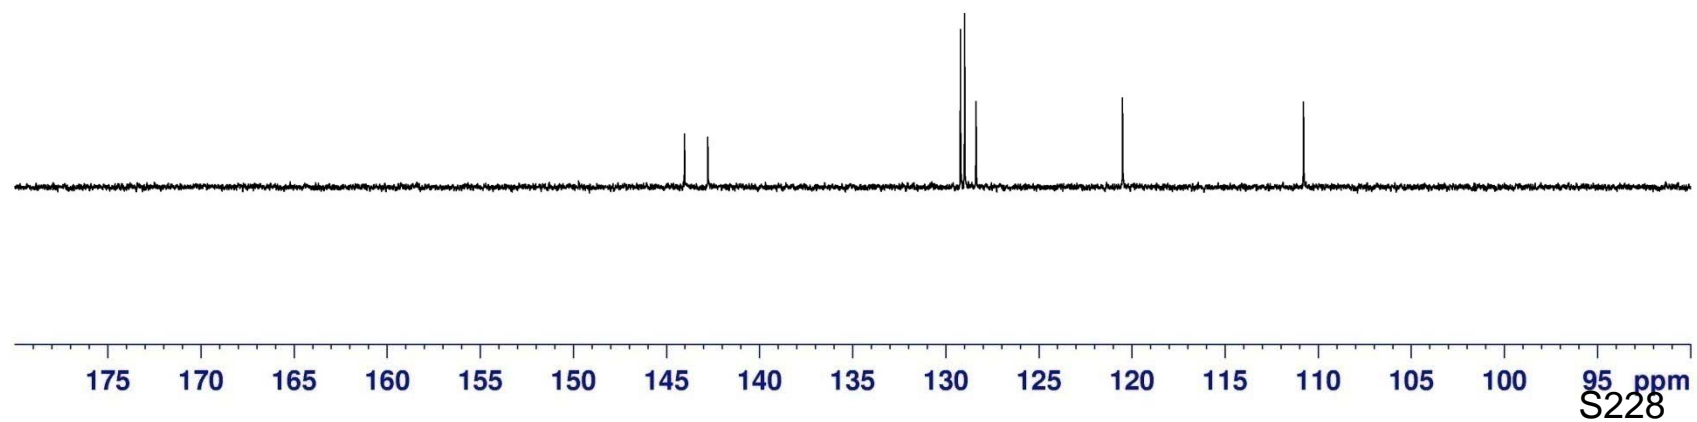

# DEPT 135 spectrum of **10c** in (CD<sub>3</sub>)<sub>2</sub>CO

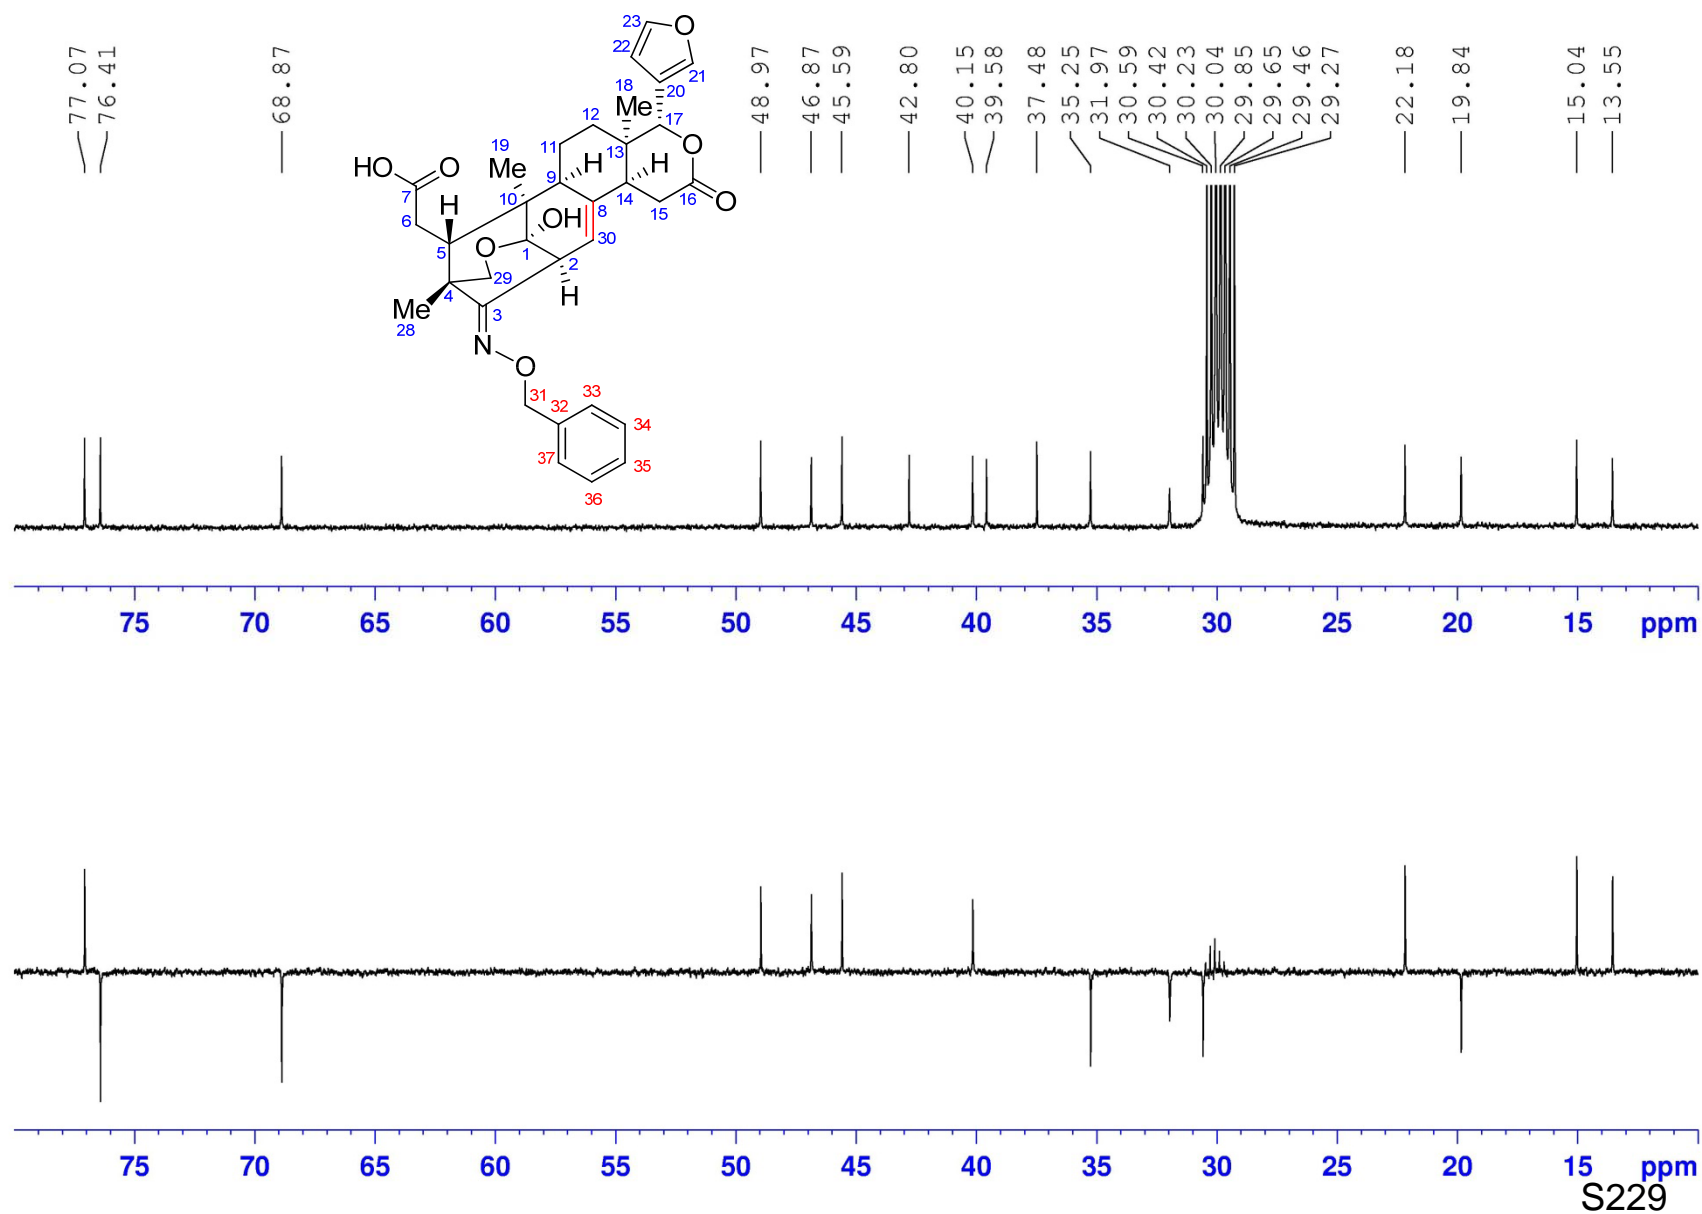

Supplement: s1 [file s1]
