# Supplementary material for: Limonoids Containing a C1–O–C29 Moiety: Isolation, Structural Modification, and Antiviral Activity
Source: MDPI journal article supplement (doi:10.3390/md16110434), 2018-11-04

# **Supporting Information-I**

**Copies of HR-ESIMS, and 1D and 2D NMR  
spectra of compounds 1–5.**

## Table of Contents:

|                                                                                                       |         |
|-------------------------------------------------------------------------------------------------------|---------|
| 1. HR-ESIMS for compound <b>1</b> .....                                                               | S4-S5   |
| 2. $^1\text{H}$ NMR (400 MHz) spectrum of compound <b>1</b> in $\text{CDCl}_3$ .....                  | S6-S8   |
| 3. $^{13}\text{C}$ NMR (100 MHz) spectrum of compound <b>1</b> in $\text{CDCl}_3$ .....               | S9-S12  |
| 4. DEPT135 (100 MHz) spectrum of compound <b>1</b> in $\text{CDCl}_3$ .....                           | S13-S16 |
| 5. $^1\text{H}$ - $^1\text{H}$ COSY (400 MHz) spectrum of compound <b>1</b> in $\text{CDCl}_3$ .....  | S17-S18 |
| 6. HSQC (400 MHz) spectrum of compound <b>1</b> in $\text{CDCl}_3$ .....                              | S19-S20 |
| 7. HMBC (400 MHz) spectrum of compound <b>1</b> in $\text{CDCl}_3$ .....                              | S21-S25 |
| 8. NOESY (400 MHz) spectrum of compound <b>1</b> in $\text{CDCl}_3$ .....                             | S26-S29 |
| 9. HR-ESIMS for compound <b>2</b> .....                                                               | S30-S31 |
| 10. $^1\text{H}$ NMR (400 MHz) spectrum of compound <b>2</b> in $\text{CDCl}_3$ .....                 | S32-S34 |
| 11. $^{13}\text{C}$ NMR (100 MHz) spectrum of compound <b>2</b> in $\text{CDCl}_3$ .....              | S35-S38 |
| 12. DEPT135 (100 MHz) spectrum of compound <b>2</b> in $\text{CDCl}_3$ .....                          | S39-S42 |
| 13. $^1\text{H}$ - $^1\text{H}$ COSY (400 MHz) spectrum of compound <b>2</b> in $\text{CDCl}_3$ ..... | S43-S46 |
| 14. HSQC (400 MHz) spectrum of compound <b>2</b> in $\text{CDCl}_3$ .....                             | S47-S49 |
| 15. HMBC (400 MHz) spectrum of compound <b>2</b> in $\text{CDCl}_3$ .....                             | S50-S55 |
| 16. NOESY (400 MHz) spectrum of compound <b>2</b> in $\text{CDCl}_3$ .....                            | S56-S58 |
| 17. HR-ESIMS for compound <b>3</b> .....                                                              | S59-S60 |
| 18. $^1\text{H}$ NMR (400 MHz) spectrum of compound <b>3</b> in $\text{CDCl}_3$ .....                 | S61-S63 |
| 19. $^{13}\text{C}$ NMR (100 MHz) spectrum of compound <b>3</b> in $\text{CDCl}_3$ .....              | S64-S67 |
| 20. DEPT135 (100 MHz) spectrum of compound <b>3</b> in $\text{CDCl}_3$ .....                          | S68-S71 |



|                                                                                                       |           |
|-------------------------------------------------------------------------------------------------------|-----------|
| 21. $^1\text{H}$ - $^1\text{H}$ COSY (400 MHz) spectrum of compound <b>3</b> in $\text{CDCl}_3$ ..... | S72-S74   |
| 22. HSQC (400 MHz) spectrum of compound <b>3</b> in $\text{CDCl}_3$ .....                             | S75-S77   |
| 23. HMBC (400 MHz) spectrum of compound <b>3</b> in $\text{CDCl}_3$ .....                             | S78-S82   |
| 24. NOESY (400 MHz) spectrum of compound <b>3</b> in $\text{CDCl}_3$ .....                            | S83-S86   |
| 25. HR-ESIMS for compound <b>4</b> .....                                                              | S87-S88   |
| 26. $^1\text{H}$ NMR (400 MHz) spectrum of compound <b>4</b> in $\text{CDCl}_3$ .....                 | S89-S91   |
| 27. $^{13}\text{C}$ NMR (100 MHz) spectrum of compound <b>4</b> in $\text{CDCl}_3$ .....              | S92-S95   |
| 28. DEPT135 (100 MHz) spectrum of compound <b>4</b> in $\text{CDCl}_3$ .....                          | S96-S99   |
| 29. $^1\text{H}$ - $^1\text{H}$ COSY (400 MHz) spectrum of compound <b>4</b> in $\text{CDCl}_3$ ..... | S100-S101 |
| 30. HSQC (400 MHz) spectrum of compound <b>4</b> in $\text{CDCl}_3$ .....                             | S102-S104 |
| 31. HMBC (400 MHz) spectrum of compound <b>4</b> in $\text{CDCl}_3$ .....                             | S105-S109 |
| 32. NOESY (400 MHz) spectrum of compound <b>4</b> in $\text{CDCl}_3$ .....                            | S110-S113 |
| 33. HR-ESIMS for compound <b>5</b> .....                                                              | S114-S115 |
| 34. $^1\text{H}$ NMR (400 MHz) spectrum of compound <b>5</b> in $\text{CDCl}_3$ .....                 | S116-S118 |
| 35. $^{13}\text{C}$ NMR (100 MHz) spectrum of compound <b>5</b> in $\text{CDCl}_3$ .....              | S119-S121 |
| 36. DEPT135 (100 MHz) spectrum of compound <b>5</b> in $\text{CDCl}_3$ .....                          | S122-S124 |
| 37. $^1\text{H}$ - $^1\text{H}$ COSY (400 MHz) spectrum of compound <b>5</b> in $\text{CDCl}_3$ ..... | S125-S128 |
| 38. HSQC (400 MHz) spectrum of compound <b>5</b> in $\text{CDCl}_3$ .....                             | S129-S131 |
| 39. HMBC (400 MHz) spectrum of compound <b>5</b> in $\text{CDCl}_3$ .....                             | S132-S136 |
| 40. NOESY (400 MHz) spectrum of compound <b>5</b> in $\text{CDCl}_3$ .....                            | S137-S140 |

# HR-ESIMS for compound 1

## Generic Display Report

### Analysis Info

Analysis Name D:\Data\MS\data\201807\liaoqi\_P-4\_pos\_57\_01\_5065.d  
Method LC\_Direct Infusion\_pos\_100-1000mz.m  
Sample Name liaoqi\_P-4\_pos  
Comment

Acquisition Date 7/3/2018 3:44:16 PM

Operator SCSIO  
Instrument maXis

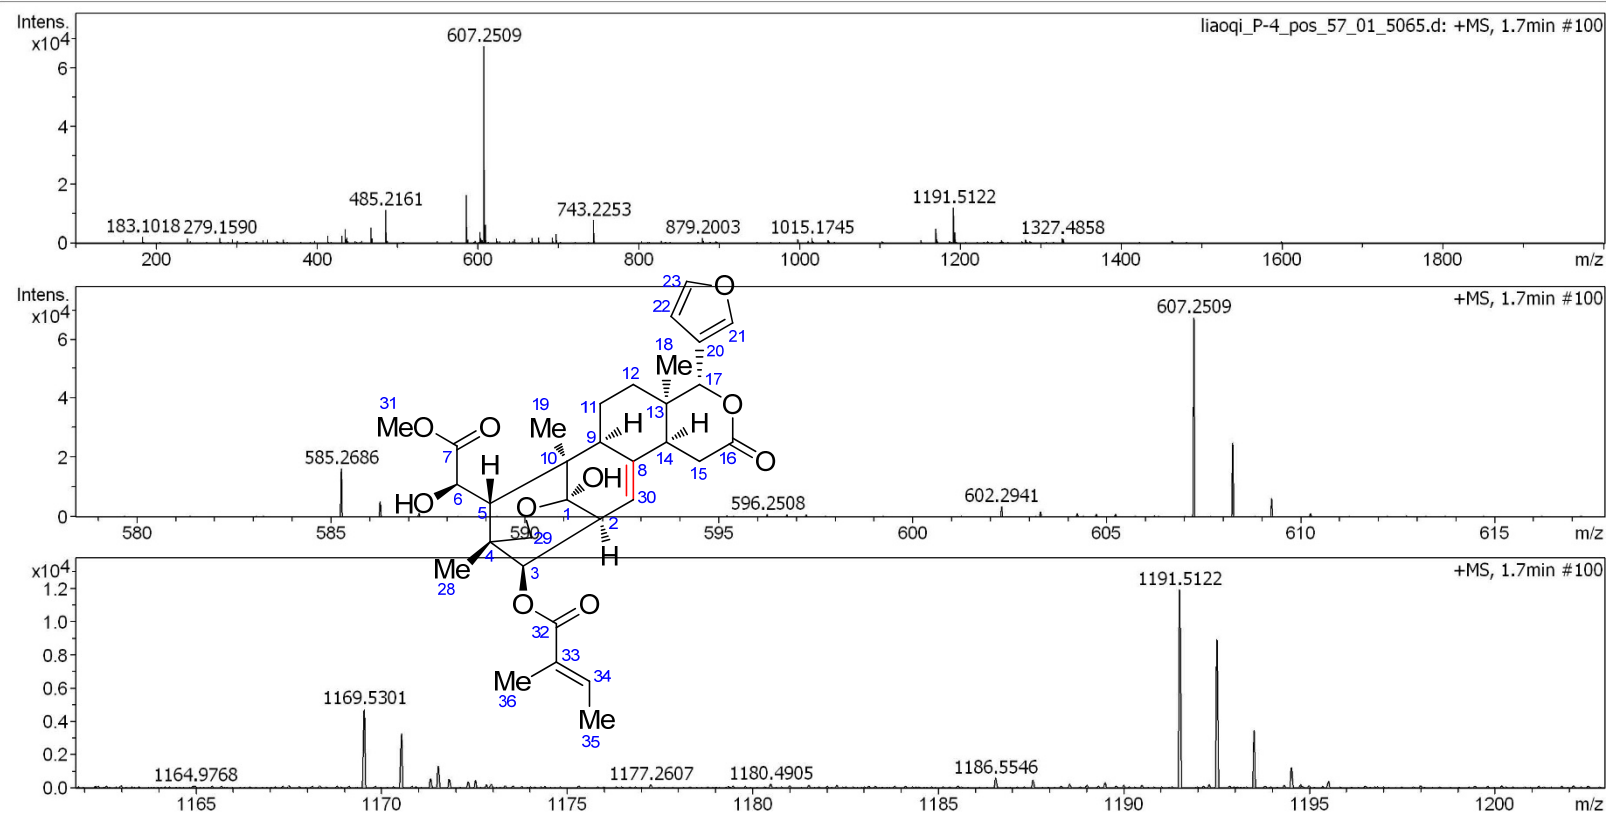

# HR-ESIMS for compound 1

## Mass Spectrum SmartFormula Report

### Analysis Info

Analysis Name D:\Data\MS\data\201807\liaoqi\_P-4\_pos\_57\_01\_5065.d  
 Method LC\_Direct Infusion\_pos\_100-1000mz.m  
 Sample Name liaoqi\_P-4\_pos  
 Comment

Acquisition Date 7/3/2018 3:44:16 PM  
 Operator SCSIO  
 Instrument maXis 255552.00029

### Acquisition Parameter

|             |          |                      |          |                  |           |
|-------------|----------|----------------------|----------|------------------|-----------|
| Source Type | ESI      | Ion Polarity         | Positive | Set Nebulizer    | 0.4 Bar   |
| Focus       | Active   | Set Capillary        | 4500 V   | Set Dry Heater   | 180 °C    |
| Scan Begin  | 100 m/z  | Set End Plate Offset | -500 V   | Set Dry Gas      | 4.0 l/min |
| Scan End    | 2000 m/z | Set Charging Voltage | 0 V      | Set Divert Valve | Waste     |
|             |          | Set Corona           | 0 nA     | Set APCI Heater  | 0 °C      |

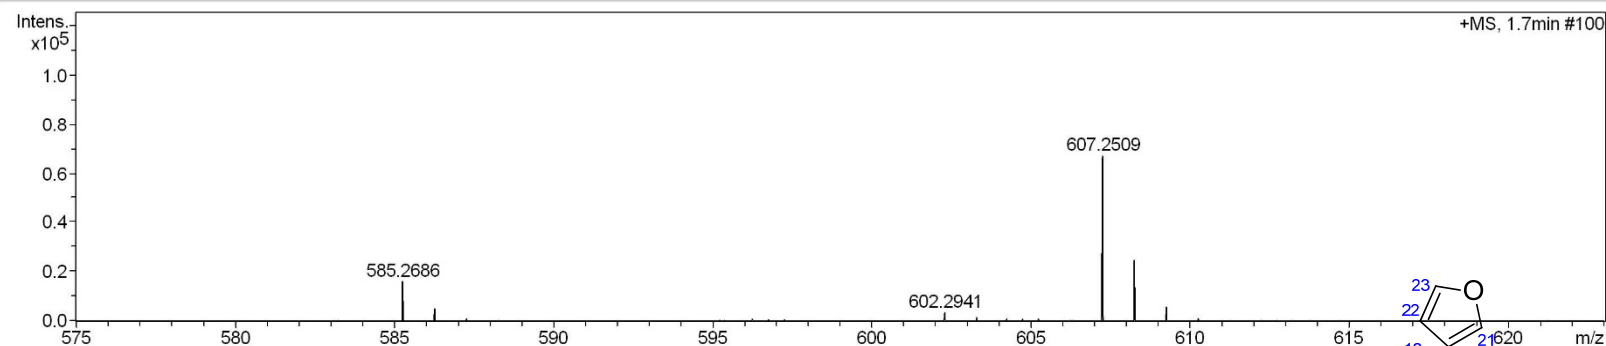

| Meas. m/z | # | Ion Formula | Score  | m/z       | err [ppm] | err [mDa] | mSigma | rdb  | e <sup>-</sup> Conf | N-Rule |
|-----------|---|-------------|--------|-----------|-----------|-----------|--------|------|---------------------|--------|
| 585.2686  | 1 | C32H41O10   | 100.00 | 585.2694  | -1.4      | -0.8      | 18.7   | 12.5 | even                | ok     |
| 607.2509  | 1 | C32H40NaO10 | 100.00 | 607.2514  | -0.7      | -0.4      | 8.6    | 12.5 | even                | ok     |
| 1169.5301 | 1 | C64H81O20   | 100.00 | 1169.5316 | -1.2      | -1.4      | 13.4   | 24.5 | even                | ok     |
| 1191.5122 | 1 | C64H80NaO20 | 100.00 | 1191.5135 | -1.1      | -1.3      | 18.4   | 24.5 | even                | ok     |

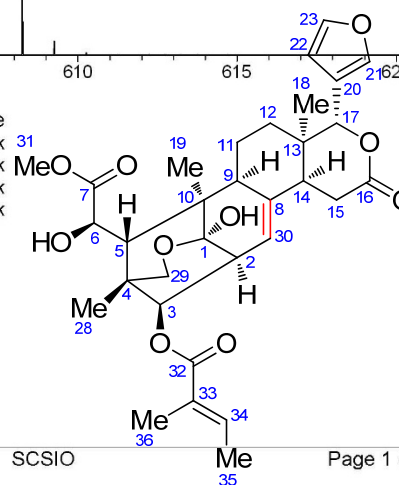

$^1\text{H}$  NMR (400 MHz) spectrum of compound **1** in  $\text{CDCl}_3$

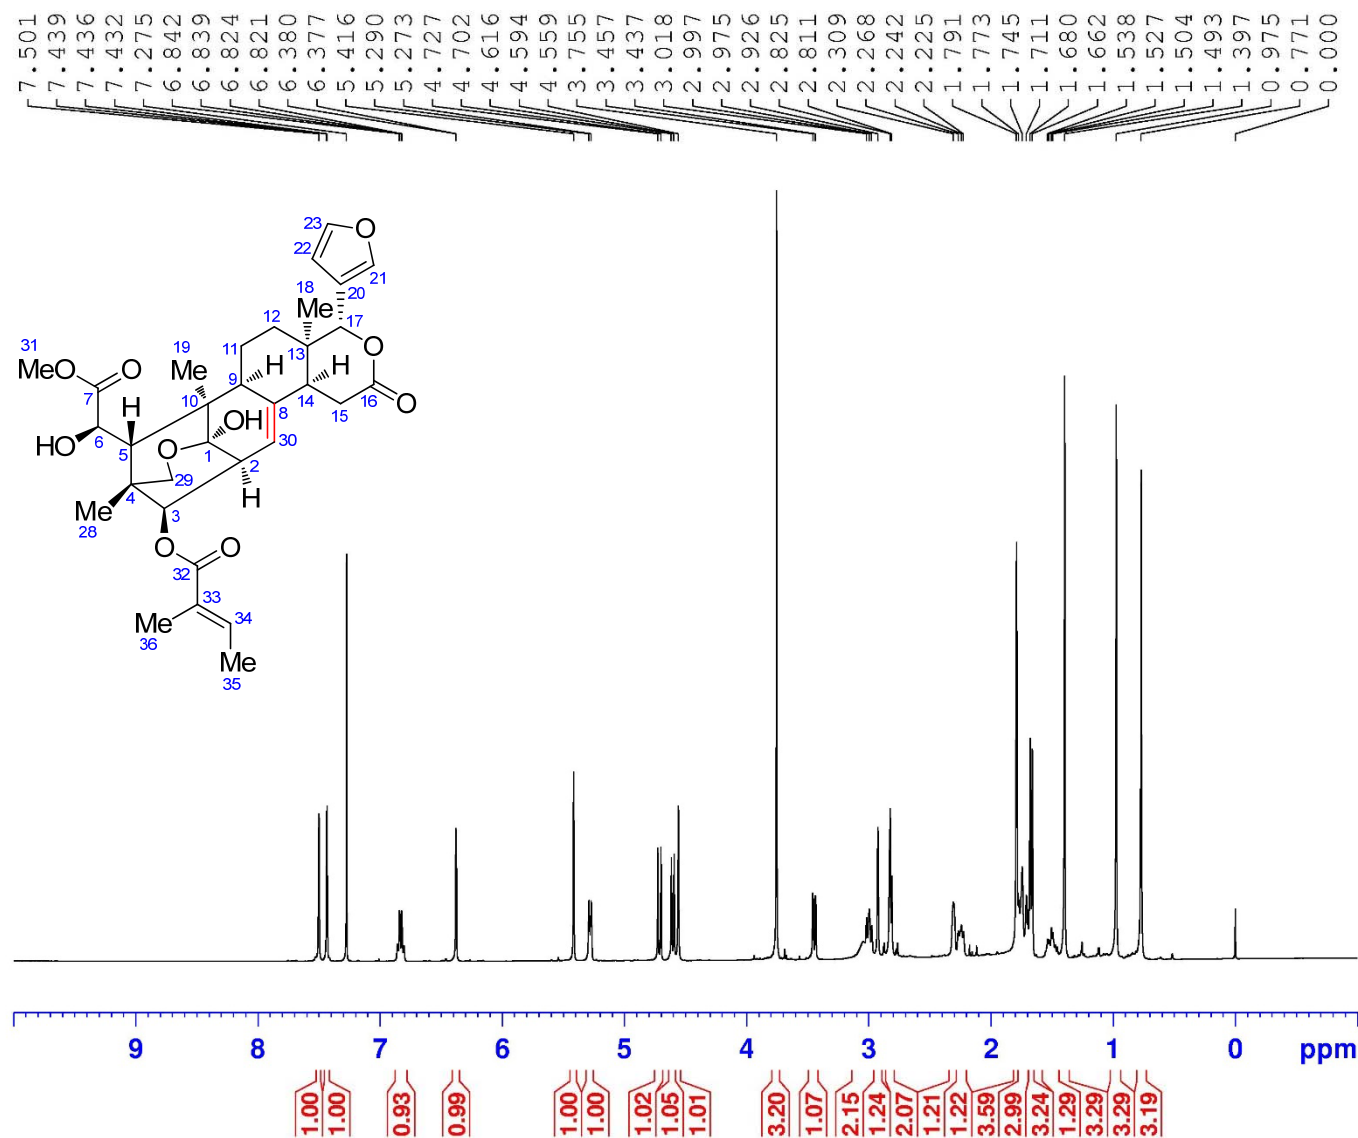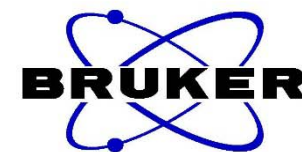

NAME ZXP-R-15-3-3  
 EXPNO 1  
 PROCNO 1  
 Date\_ 20180508  
 Time 6.06  
 INSTRUM spect  
 PROBHD 5 mm CPPBBO BB  
 PULPROG zg30  
 TD 65536  
 SOLVENT  $\text{CDCl}_3$   
 NS 16  
 DS 2  
 SWH 8223.685 Hz  
 FIDRES 0.125483 Hz  
 AQ 3.9846387 sec  
 RG 44.55  
 DW 60.800 usec  
 DE 10.00 usec  
 TE 297.0 K  
 D1 1.00000000 sec  
 TD0 1

===== CHANNEL f1 =====  
 SFO1 400.1324710 MHz  
 NUC1  $^1\text{H}$   
 P1 11.50 usec  
 SI 65536  
 SF 400.1300037 MHz  
 WDW EM  
 SSB 0  
 LB 0.30 Hz  
 GB 0  
 PC 1.00

$^1\text{H}$  NMR (400 MHz) spectrum of compound **1** in  $\text{CDCl}_3$

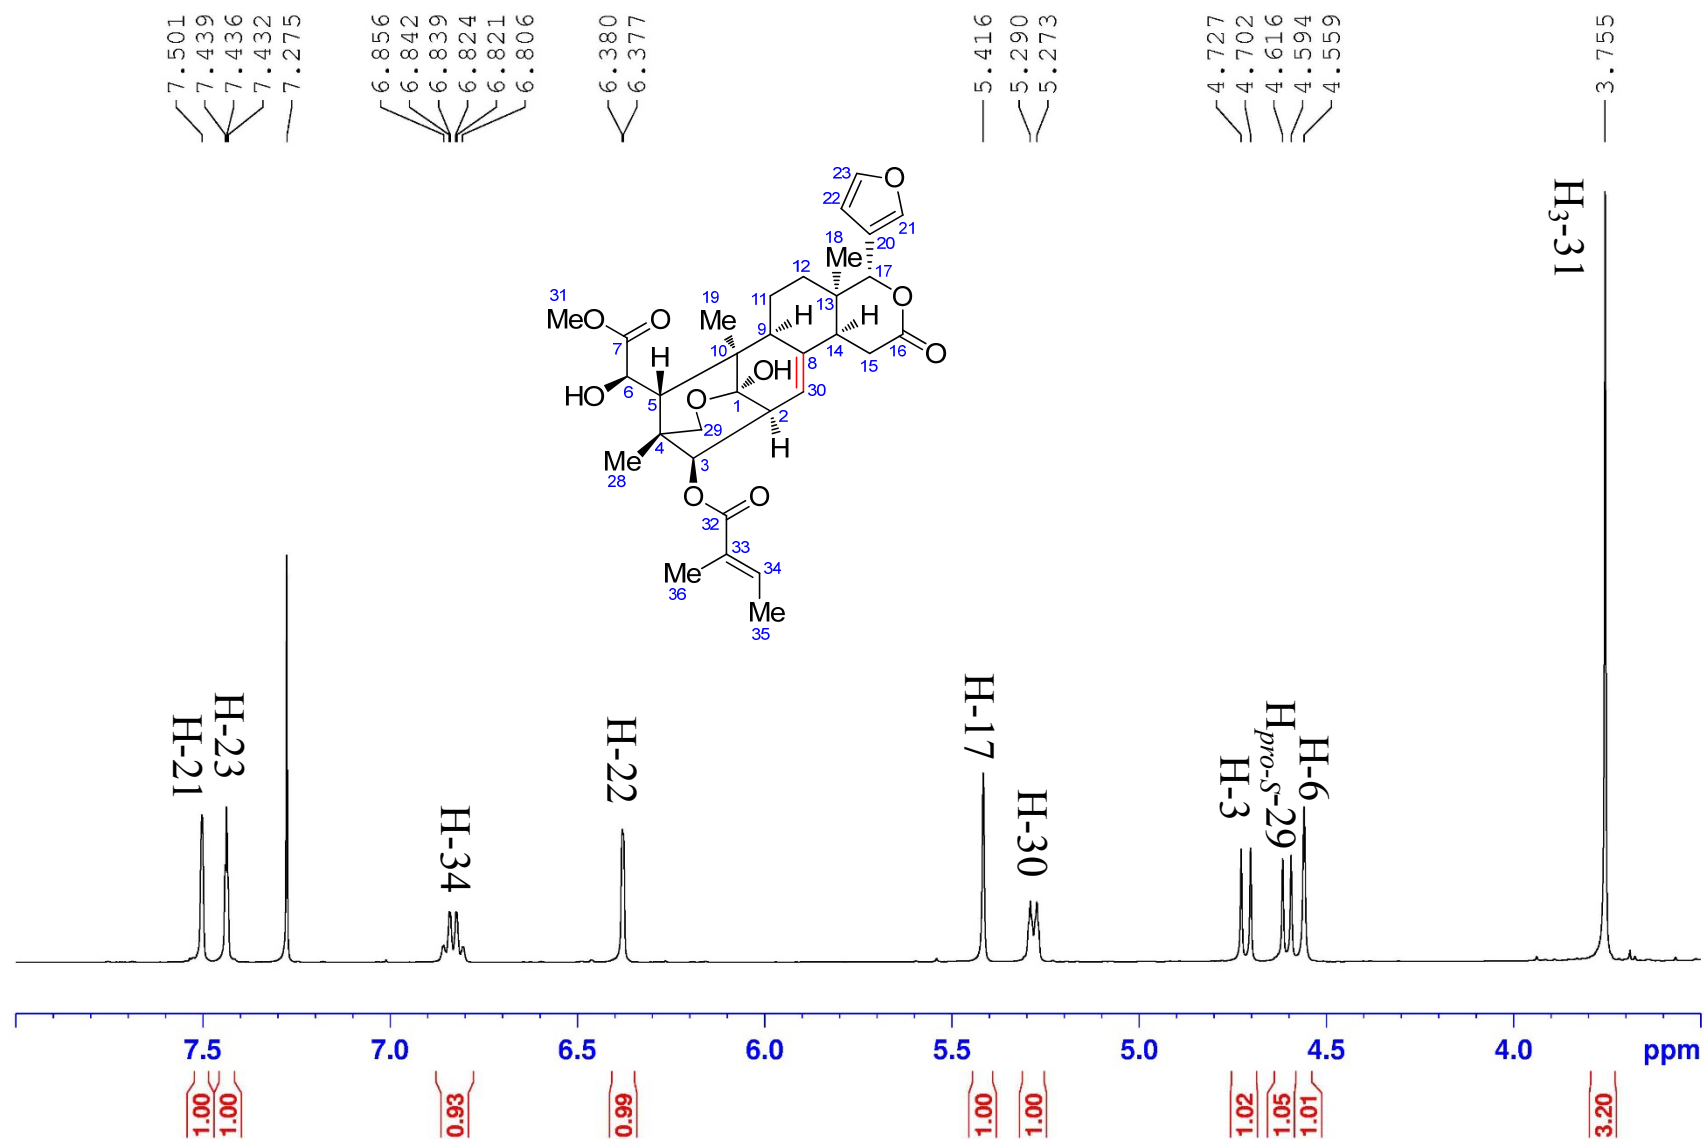

$^1\text{H}$  NMR (400 MHz) spectrum of compound **1** in  $\text{CDCl}_3$

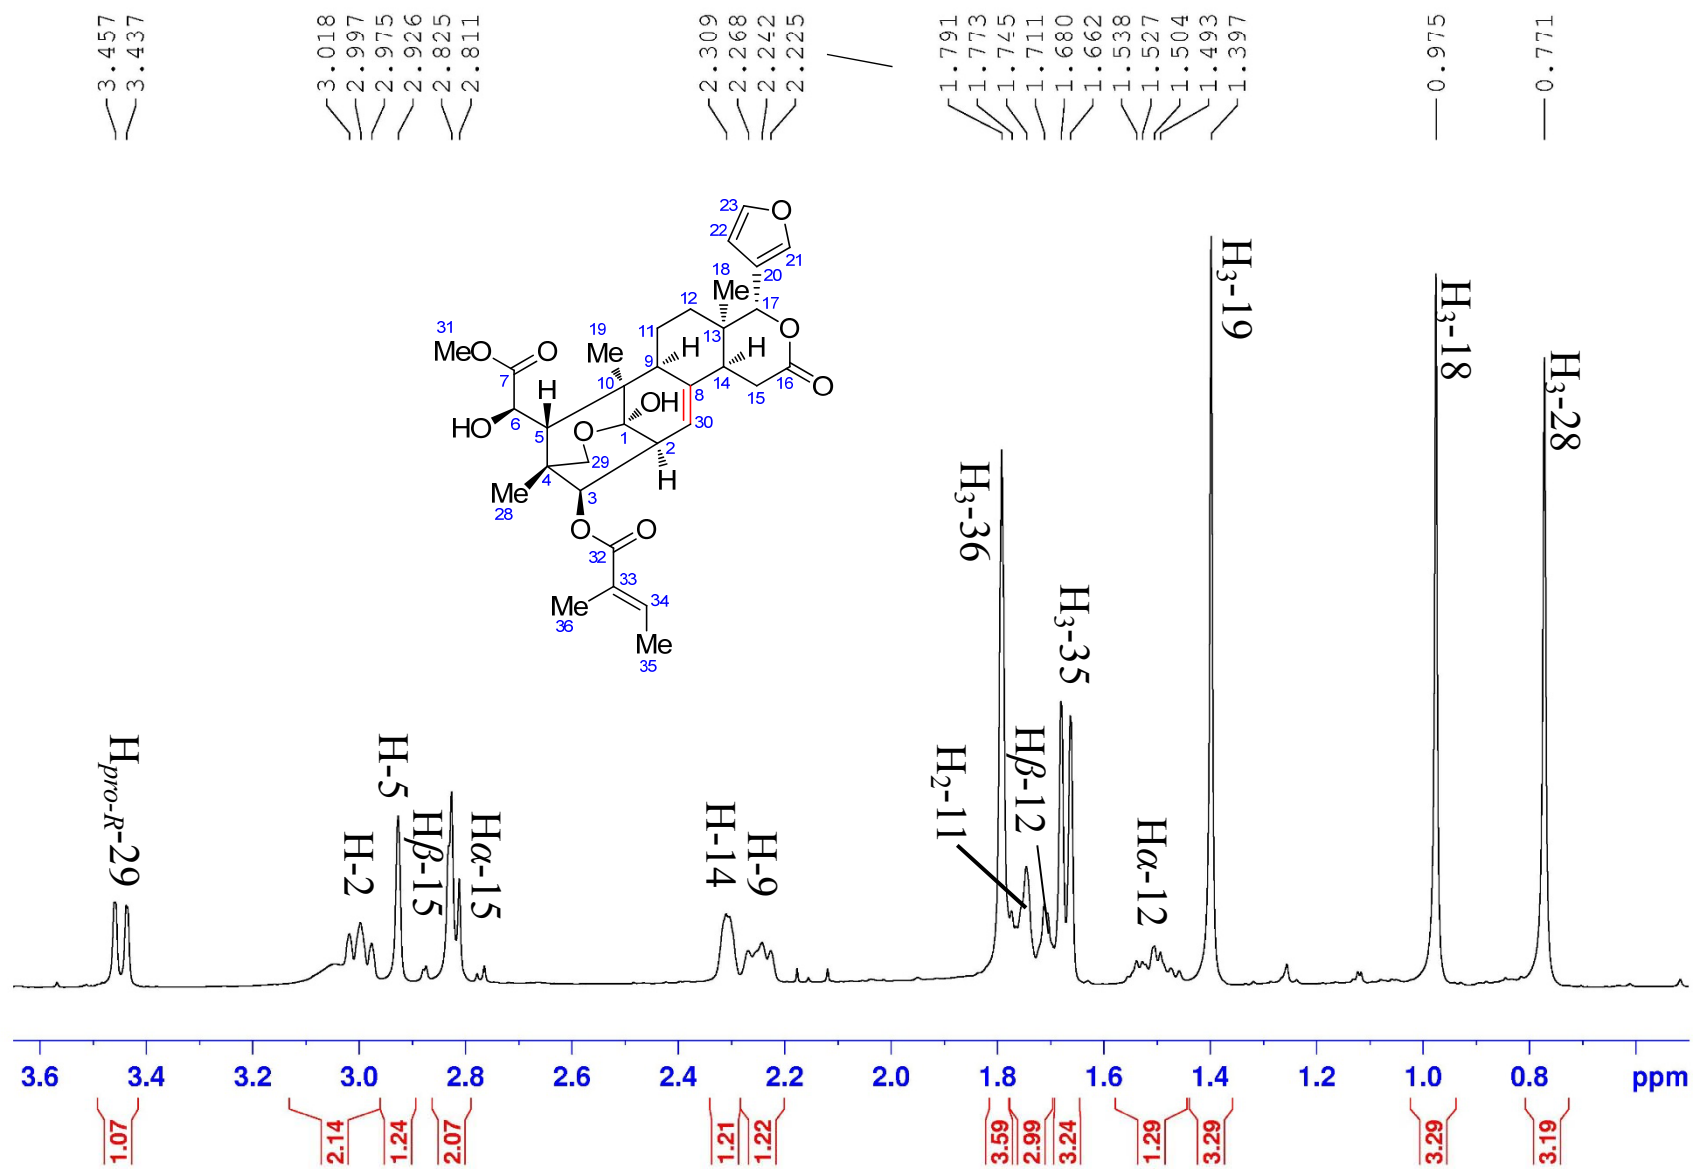

$^{13}\text{C}$  NMR (100 MHz) spectrum of compound **1** in  $\text{CDCl}_3$

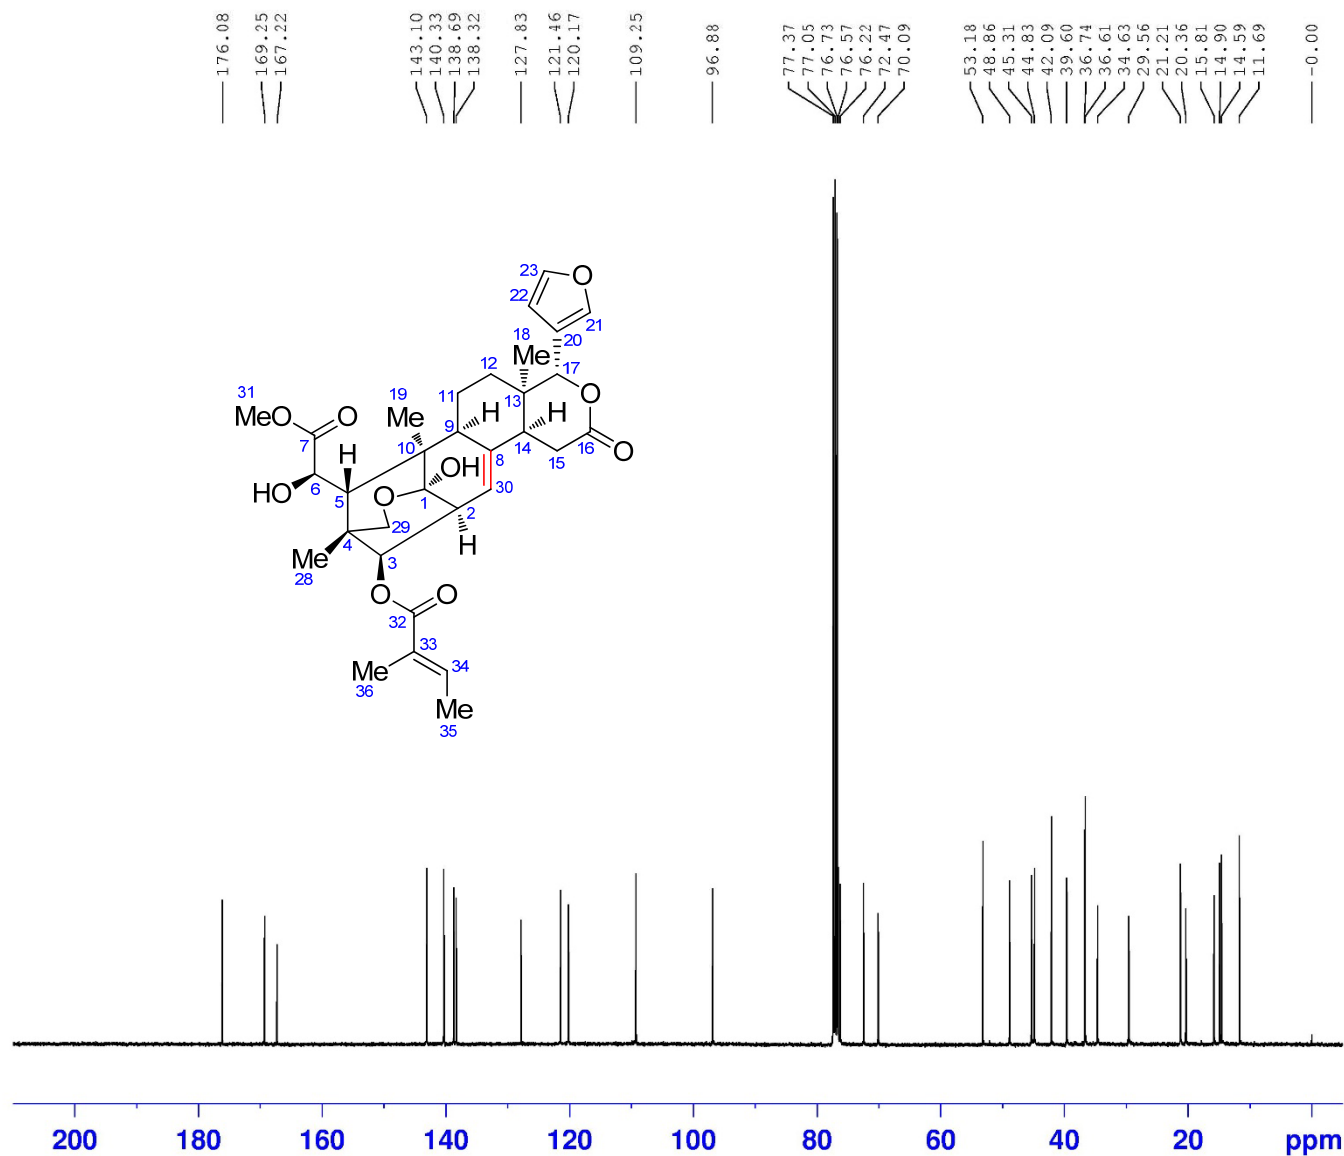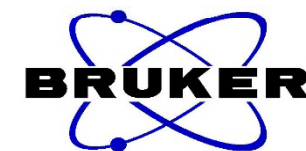

```

NAME      zxp-R-15-3-3
EXPNO     2
PROCNO    1
Date_     20180508
Time      7.05
INSTRUM   spect
PROBHD    5 mm CPPBBO BB
PULPROG   zgpg30
TD        65536
SOLVENT   CDCl3
NS        1024
DS        4
SWH       24038.461 Hz
FIDRES    0.366798 Hz
AQ        1.3631988 sec
RG        130.26
DW        20.800 usec
DE        18.00 usec
TE        297.0 K
D1        2.00000000 sec
D11       0.03000000 sec
TD0       1
    
```

```

===== CHANNEL f1 =====
SFO1     100.6233324 MHz
NUC1     13C
P1       10.00 usec
SI       32768
SF       100.6127690 MHz
WDW      EM
SSB      0
LB       1.00 Hz
GB       0
PC       1.40
    
```

$^{13}\text{C}$  NMR (100 MHz) spectrum of compound **1** in  $\text{CDCl}_3$

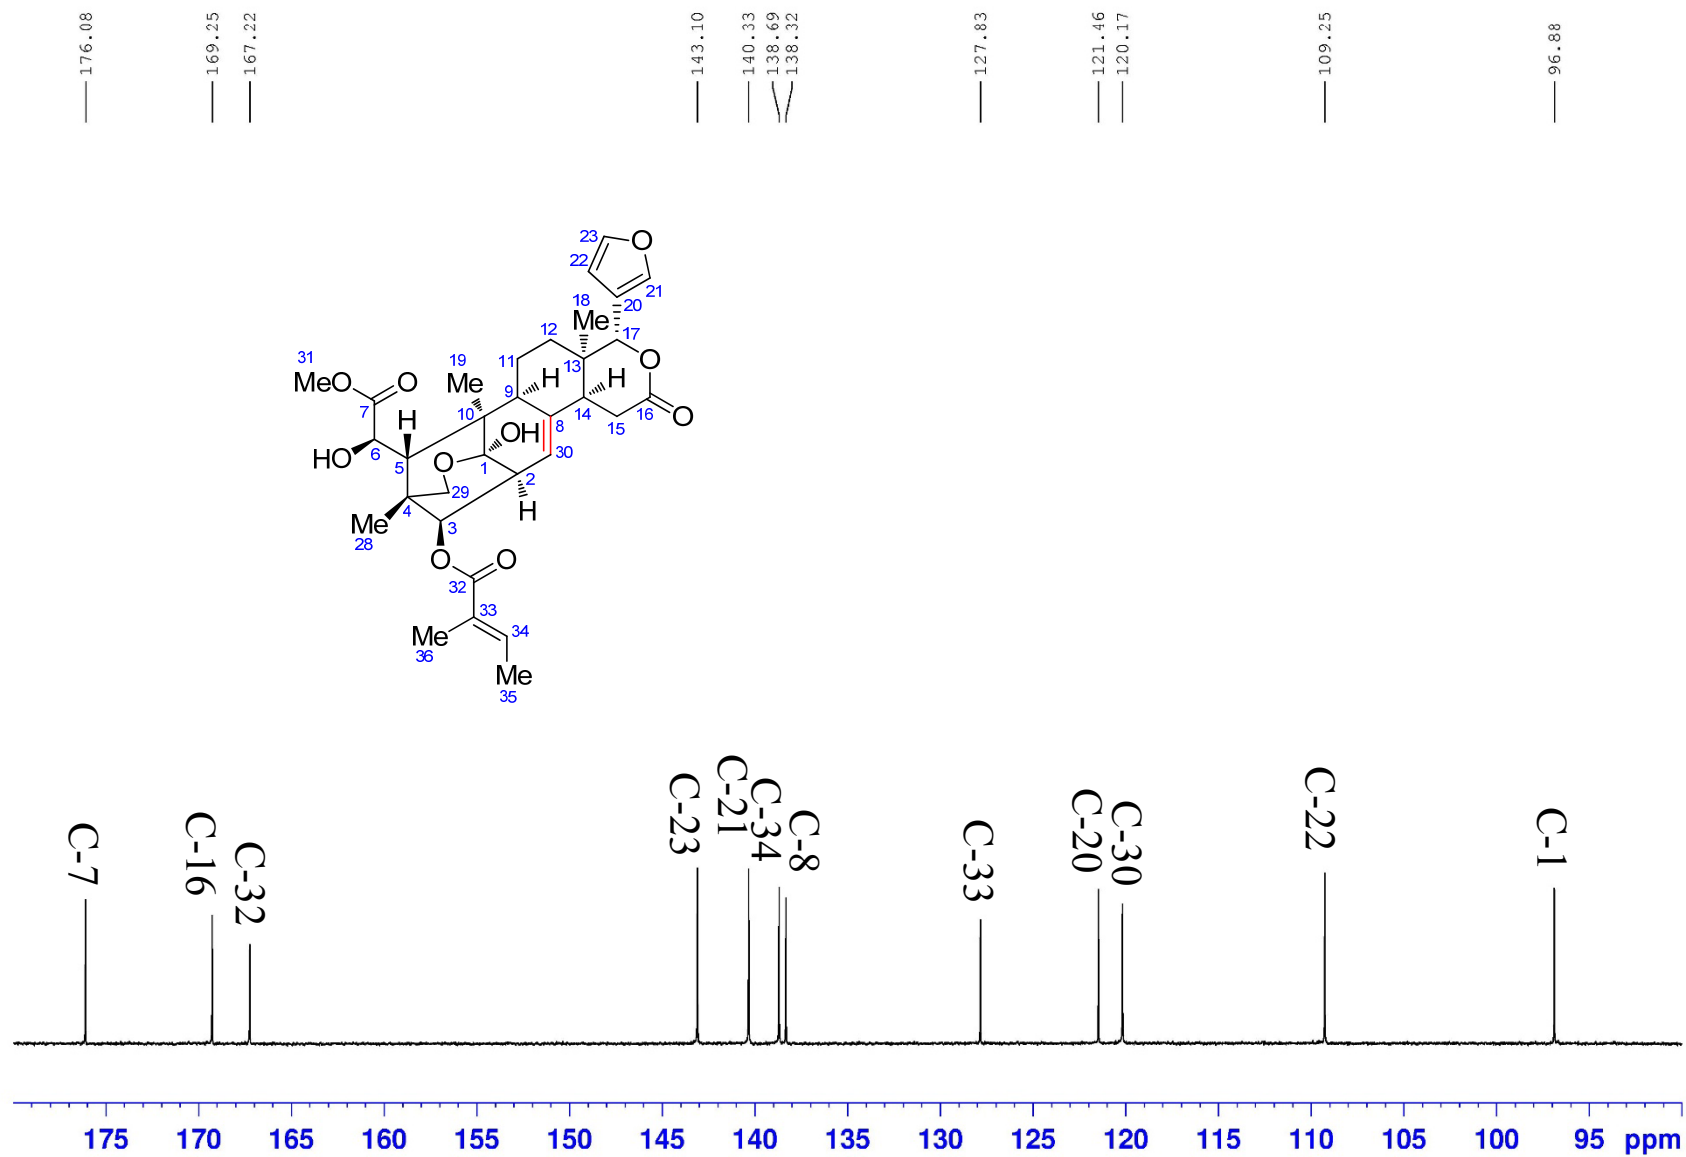



$^{13}\text{C}$  NMR (100 MHz) spectrum of compound **1** in  $\text{CDCl}_3$

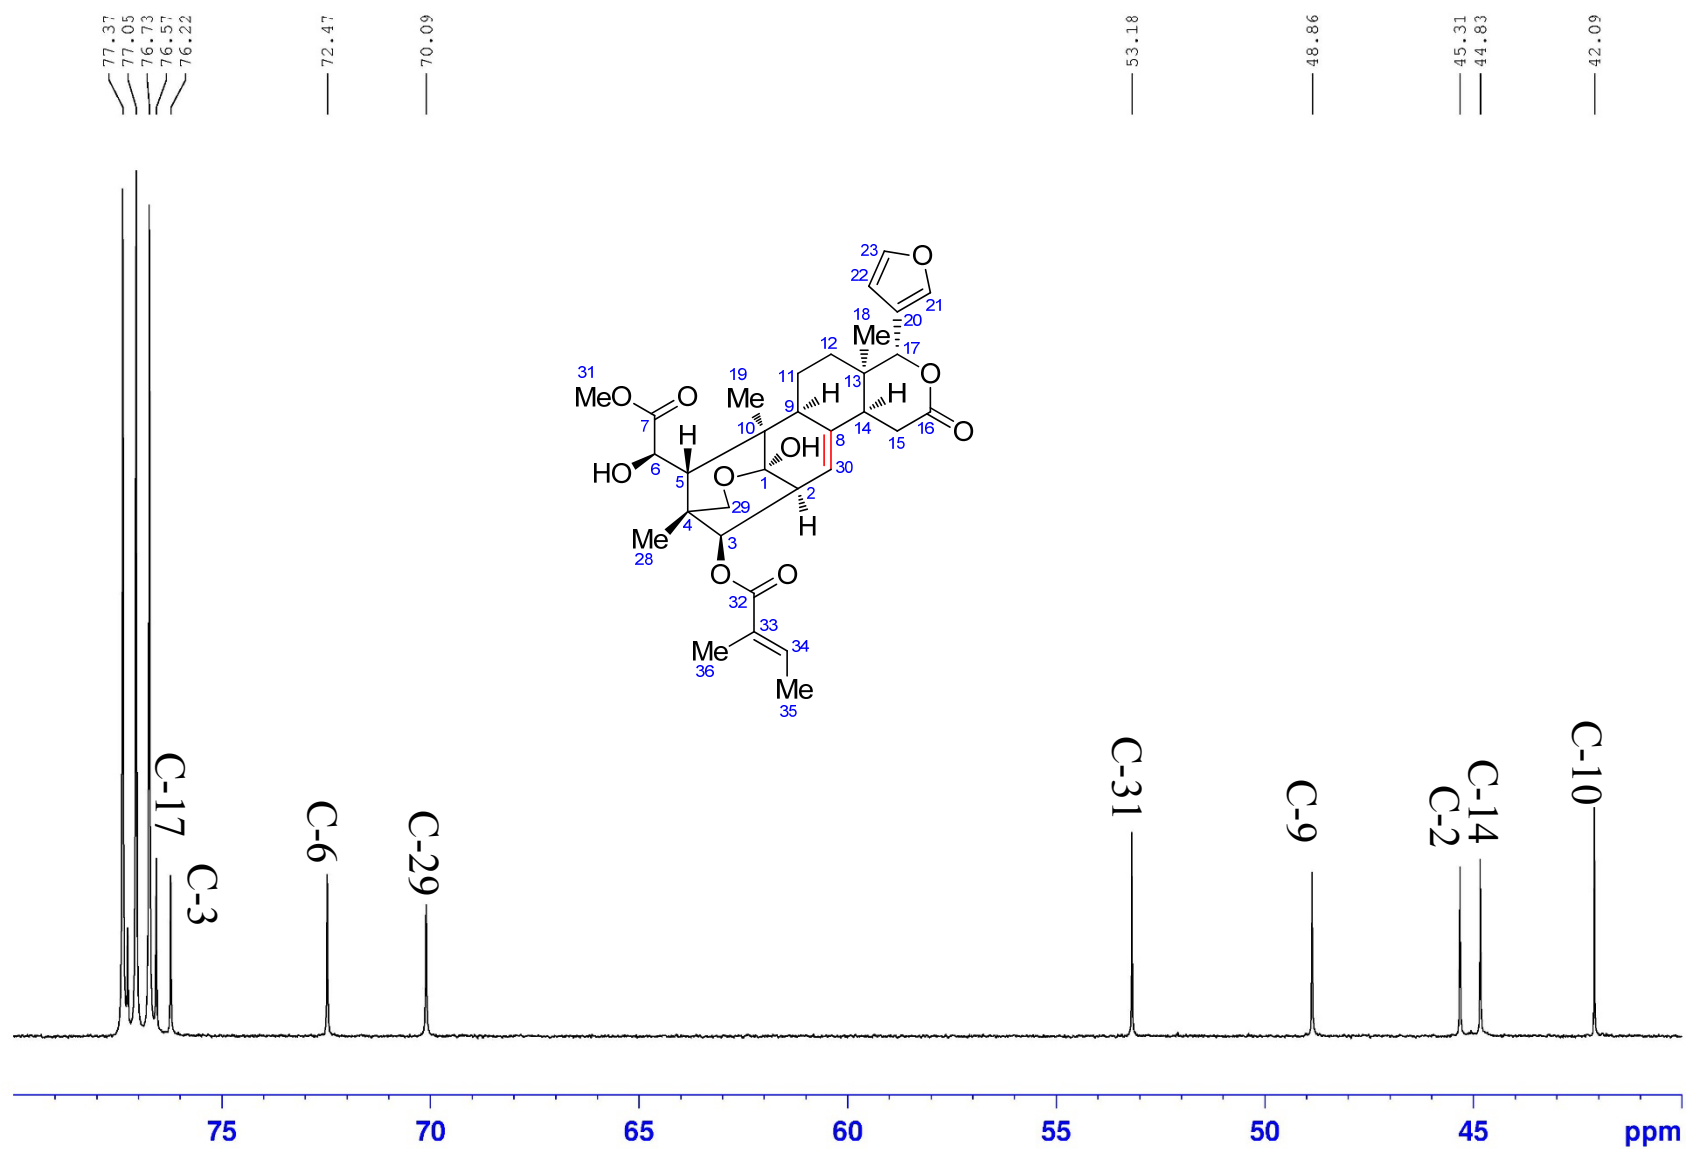

$^{13}\text{C}$  NMR (100 MHz) spectrum of compound **1** in  $\text{CDCl}_3$

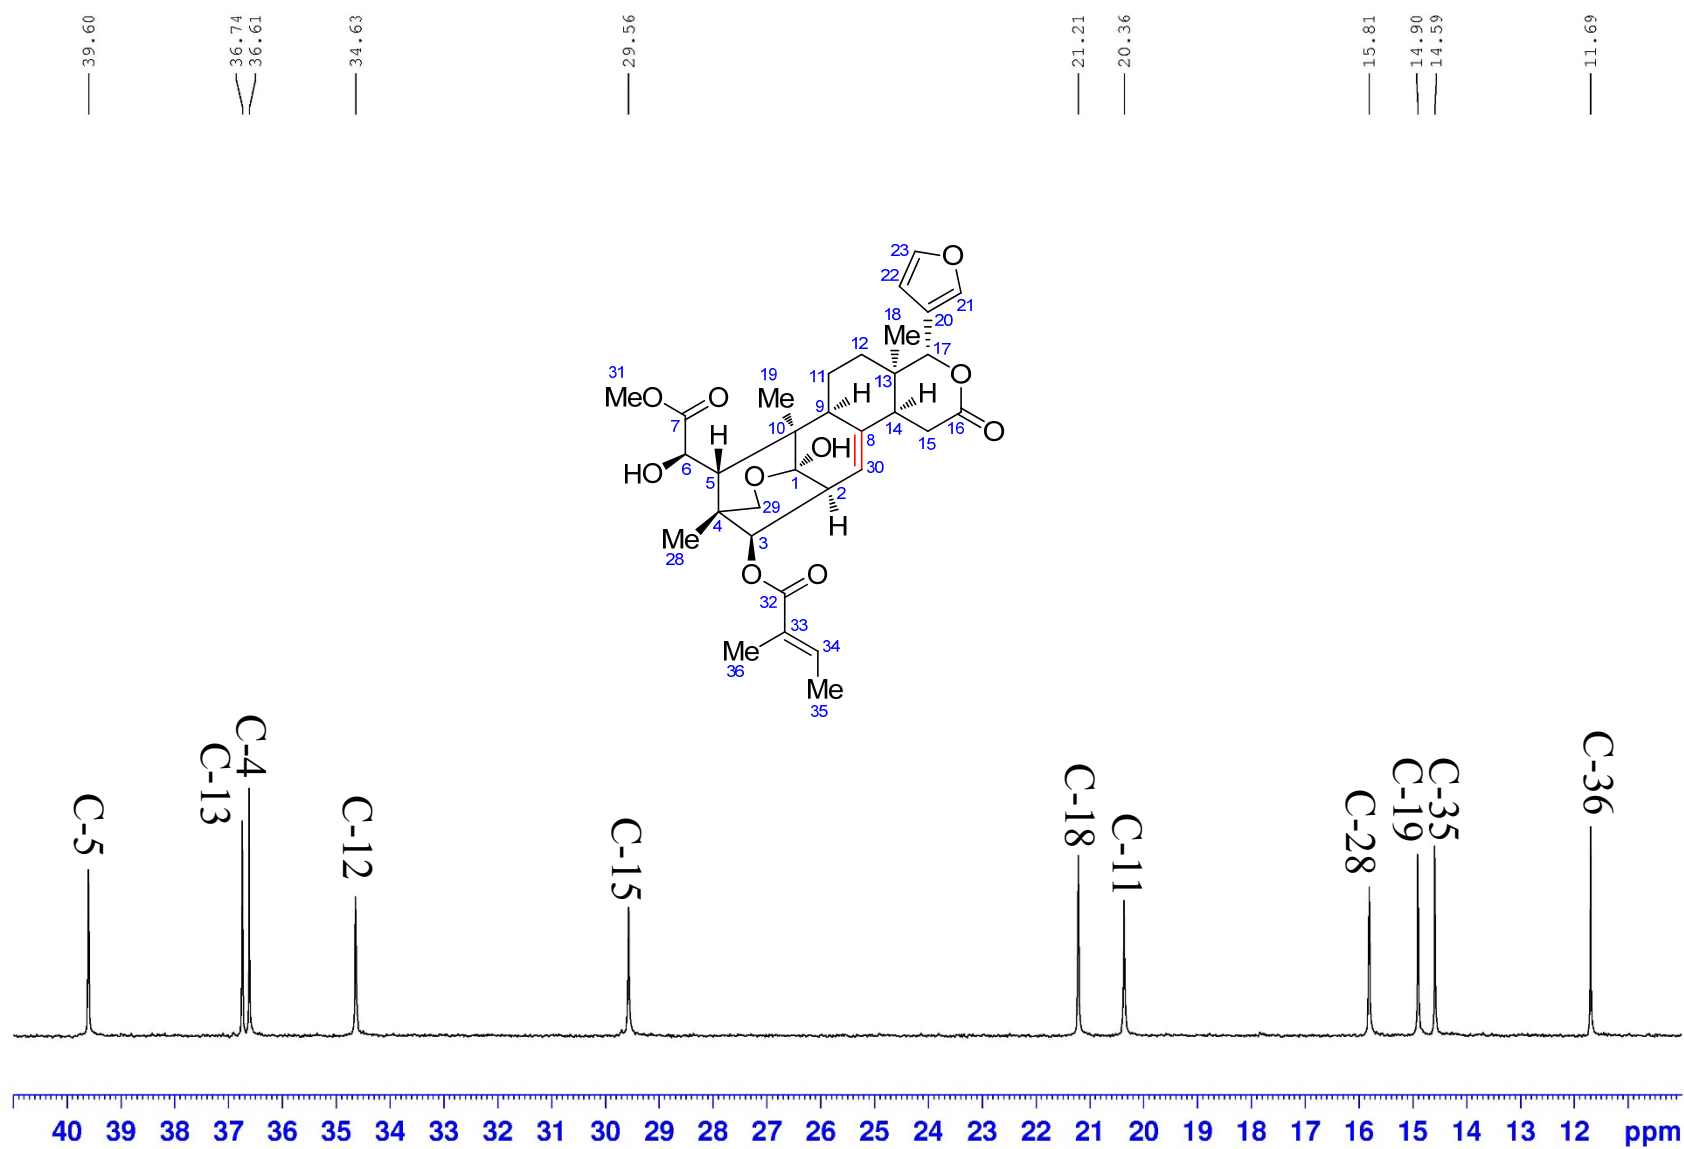

# DEPT135 (100 MHz) spectrum of compound **1** in CDCl<sub>3</sub>

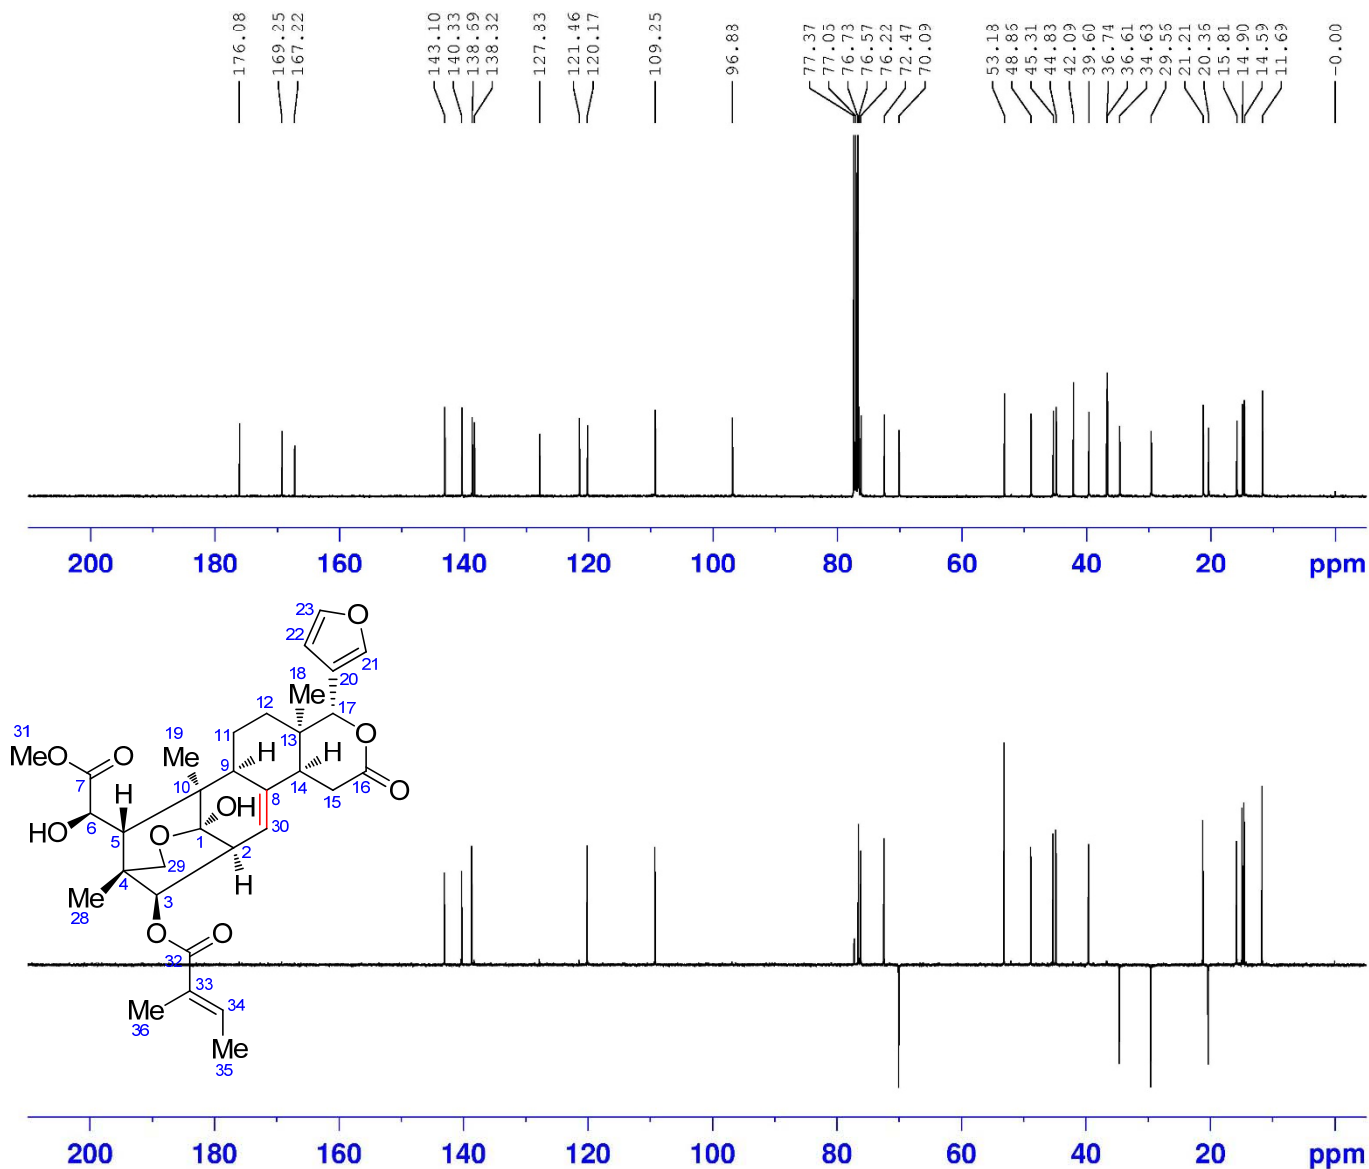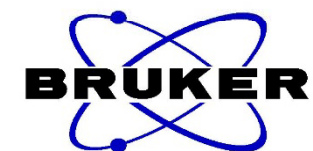

NAME zxp-R-15-3-3  
 EXPNO 2  
 PROCNO 1  
 Date\_ 20180508  
 Time 7.05  
 INSTRUM spect  
 PROBHD 5 mm CPPBBO BB  
 PULPROG zgpg30  
 TD 65536  
 SOLVENT CDCl3  
 NS 1024  
 DS 4  
 SWH 24038.461 Hz  
 FIDRES 0.366798 Hz  
 AQ 1.3631988 sec  
 RG 130.26  
 DW 20.800 usec  
 DE 18.00 usec  
 TE 297.0 K  
 D1 2.00000000 sec  
 D11 0.03000000 sec  
 TD0 1

===== CHANNEL f1 =====  
 SF01 100.6233324 MHz  
 NUC1 13C  
 P1 10.00 usec  
 SI 32768  
 SF 100.6127690 MHz  
 WDW EM  
 SSB 0  
 LB 1.00 Hz  
 GB 0  
 PC 1.40

DEPT135 (100 MHz) spectrum of compound **1** in CDCl<sub>3</sub>

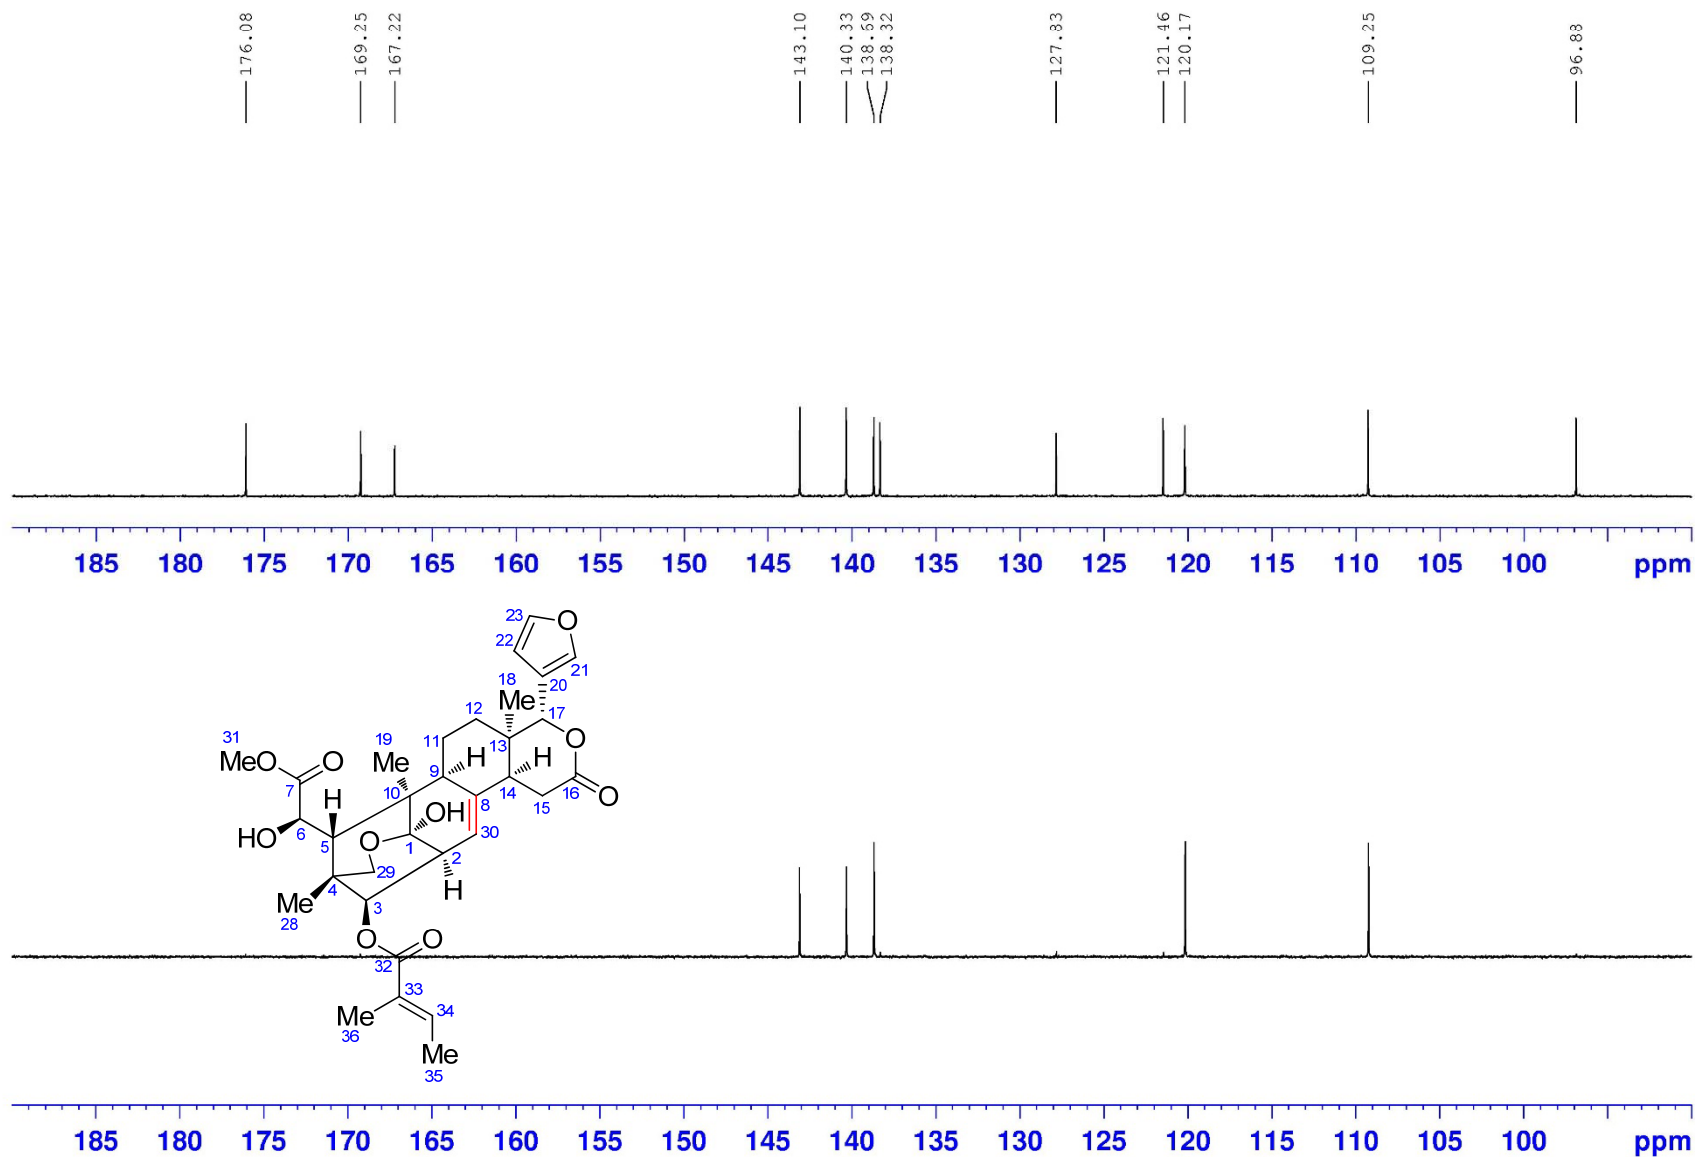

DEPT135 (100 MHz) spectrum of compound **1** in CDCl<sub>3</sub>

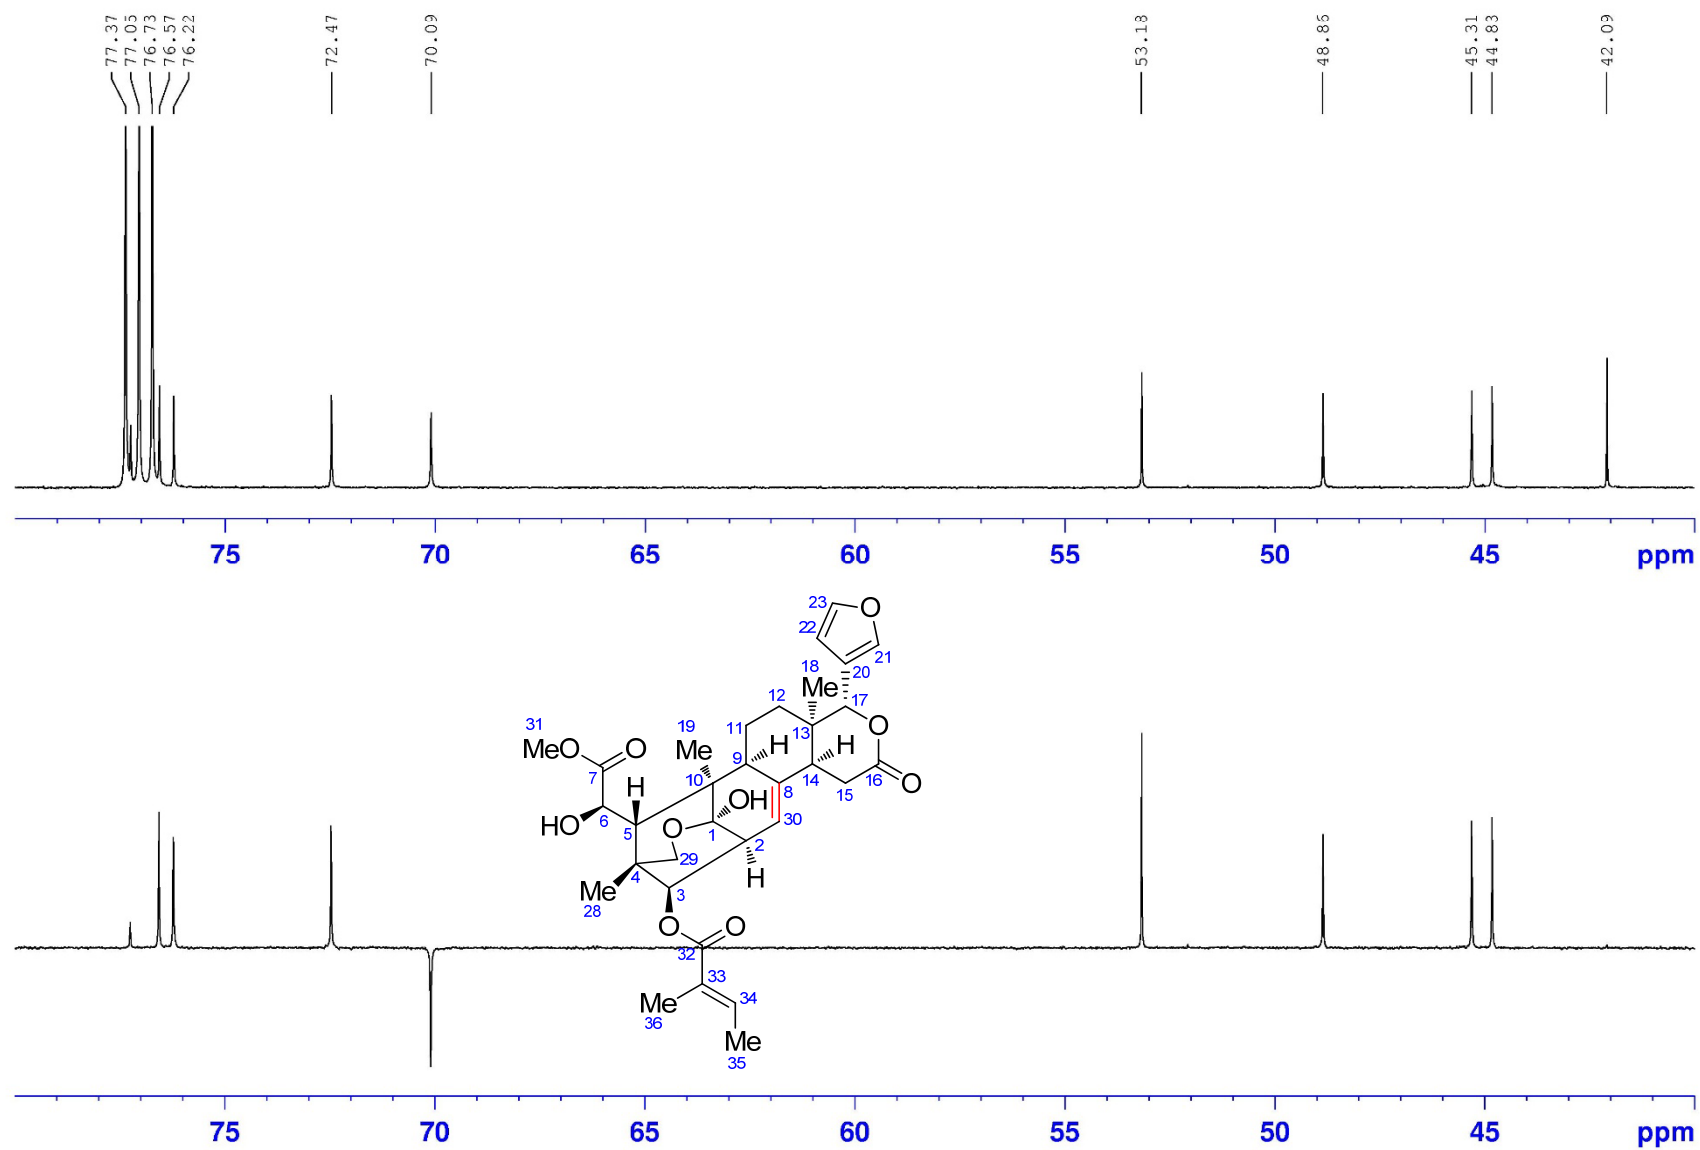

DEPT135 (100 MHz) spectrum of compound **1** in CDCl<sub>3</sub>

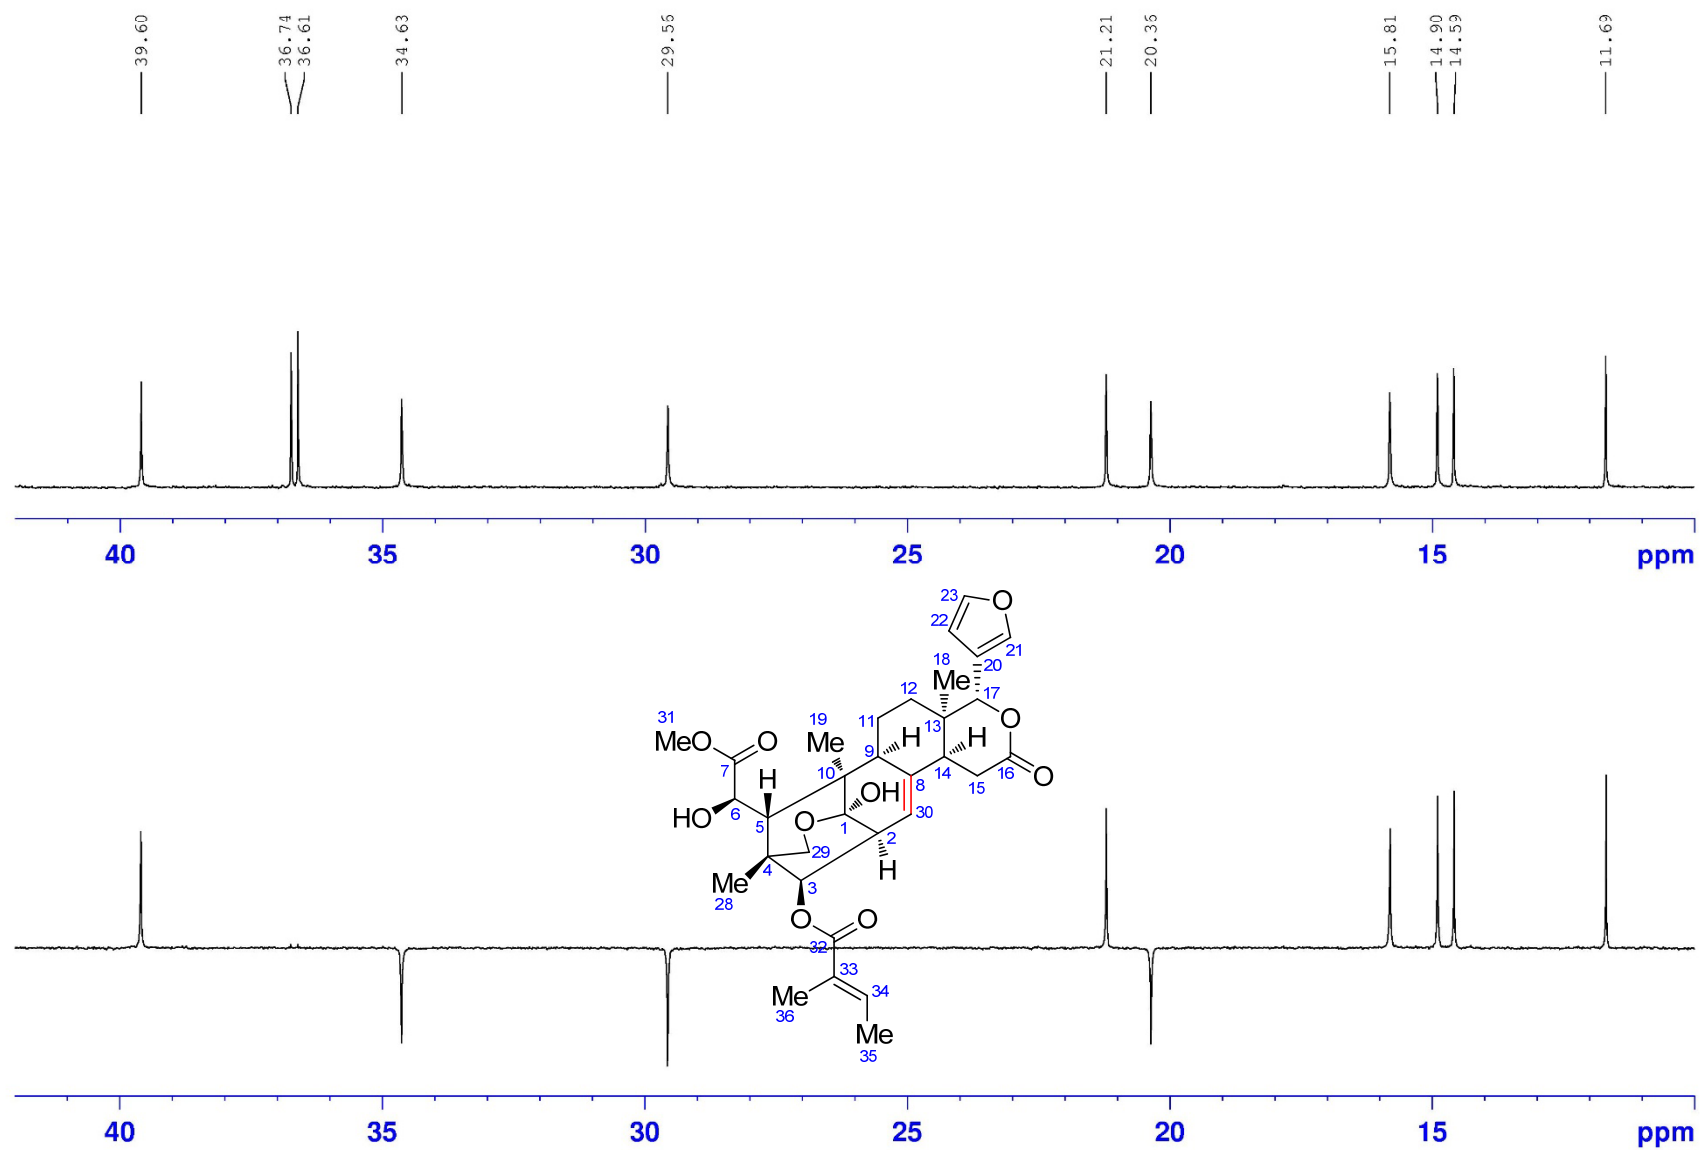

$^1\text{H}$ - $^1\text{H}$  COSY (400 MHz) spectrum of compound **1** in  $\text{CDCl}_3$

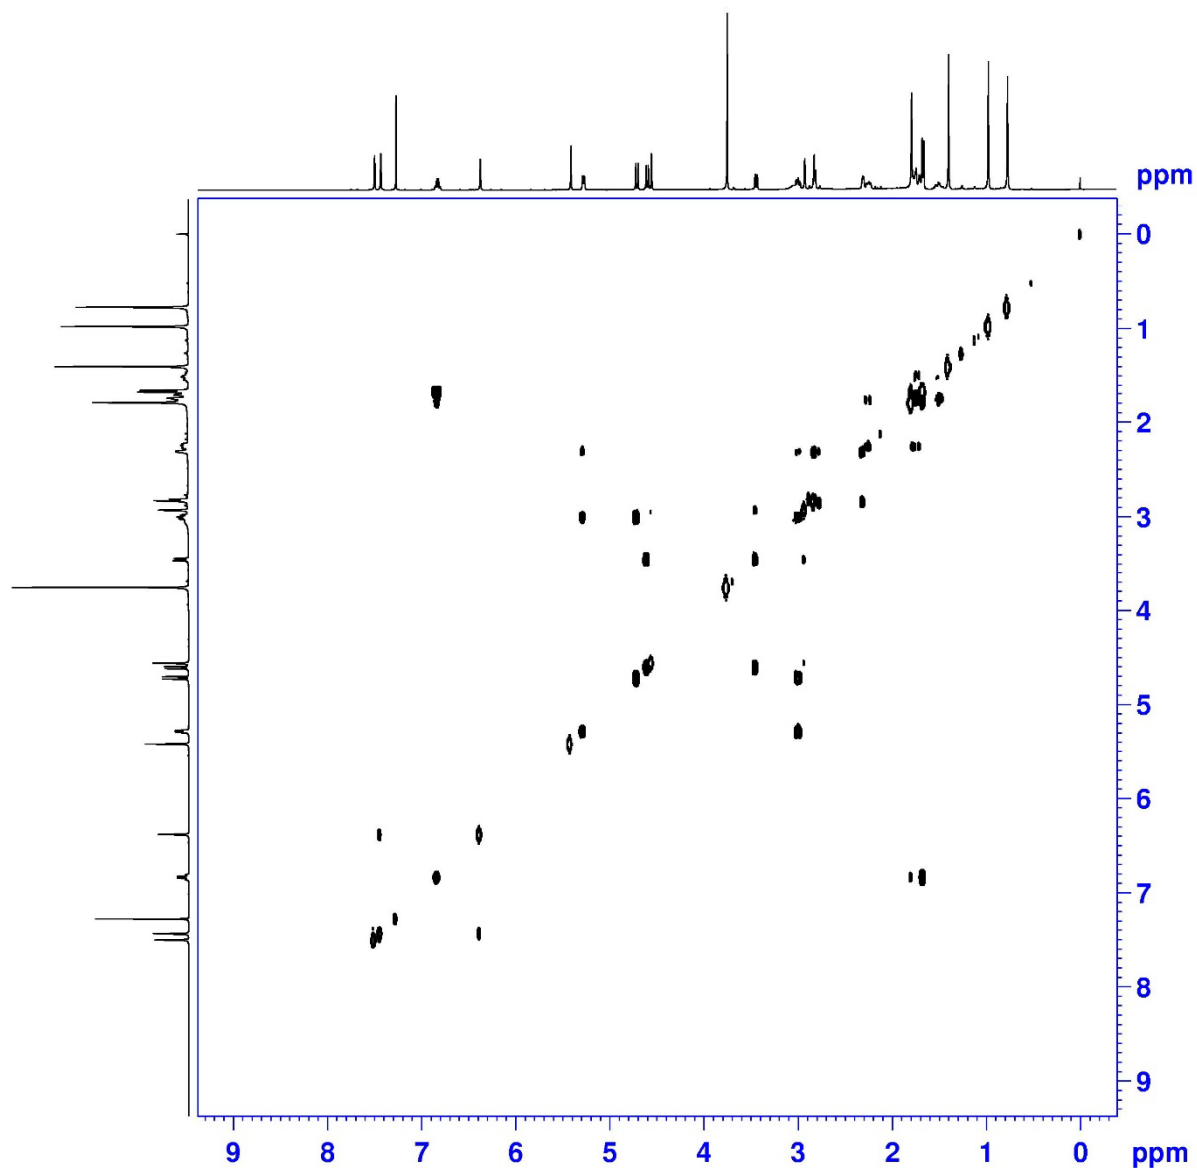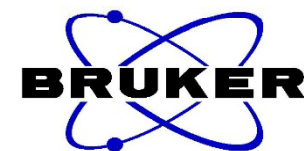

```

NAME      zxp-R-15-3-3
EXPNO     4
PROCNO    1
Date_     20180605
Time      22.56
INSTRUM   spect
PROBHD    5 mm CPMBO BB
PULPROG   cosygpppqf
TD         2048
SOLVENT   CDCl3
NS         8
DS         8
SWH        3906.250 Hz
FIDRES     1.907349 Hz
AQ         0.2621940 sec
RG         91.64
DW         128.000 usec
DE         10.00 usec
TE         297.0 K
D0         0.00000300 sec
D1         1.89678097 sec
D11        0.03000000 sec
D12        0.00002000 sec
D13        0.00000400 sec
D16        0.00020000 sec
IN0        0.00025600 sec
  
```

```

===== CHANNEL f1 =====
SFO1      400.1318006 MHz
NUC1       1H
P0         11.50 usec
P1         11.50 usec
P17        2500.00 usec
ND0         1
TD         128
SFO1      400.1318 MHz
FIDRES     30.517578 Hz
SW         9.762 ppm
FnMODE     QF
SI         1024
SF         400.1300020 MHz
WDW        QSINE
SSB         0
LB         0.00 Hz
GB         0
PC         1.40
SI         1024
MC2        QF
SF         400.1300017 MHz
WDW        QSINE
SSB         0
LB         0.00 Hz
GB         0
  
```

$^1\text{H}$ - $^1\text{H}$  COSY (400 MHz) spectrum of compound **1** in  $\text{CDCl}_3$

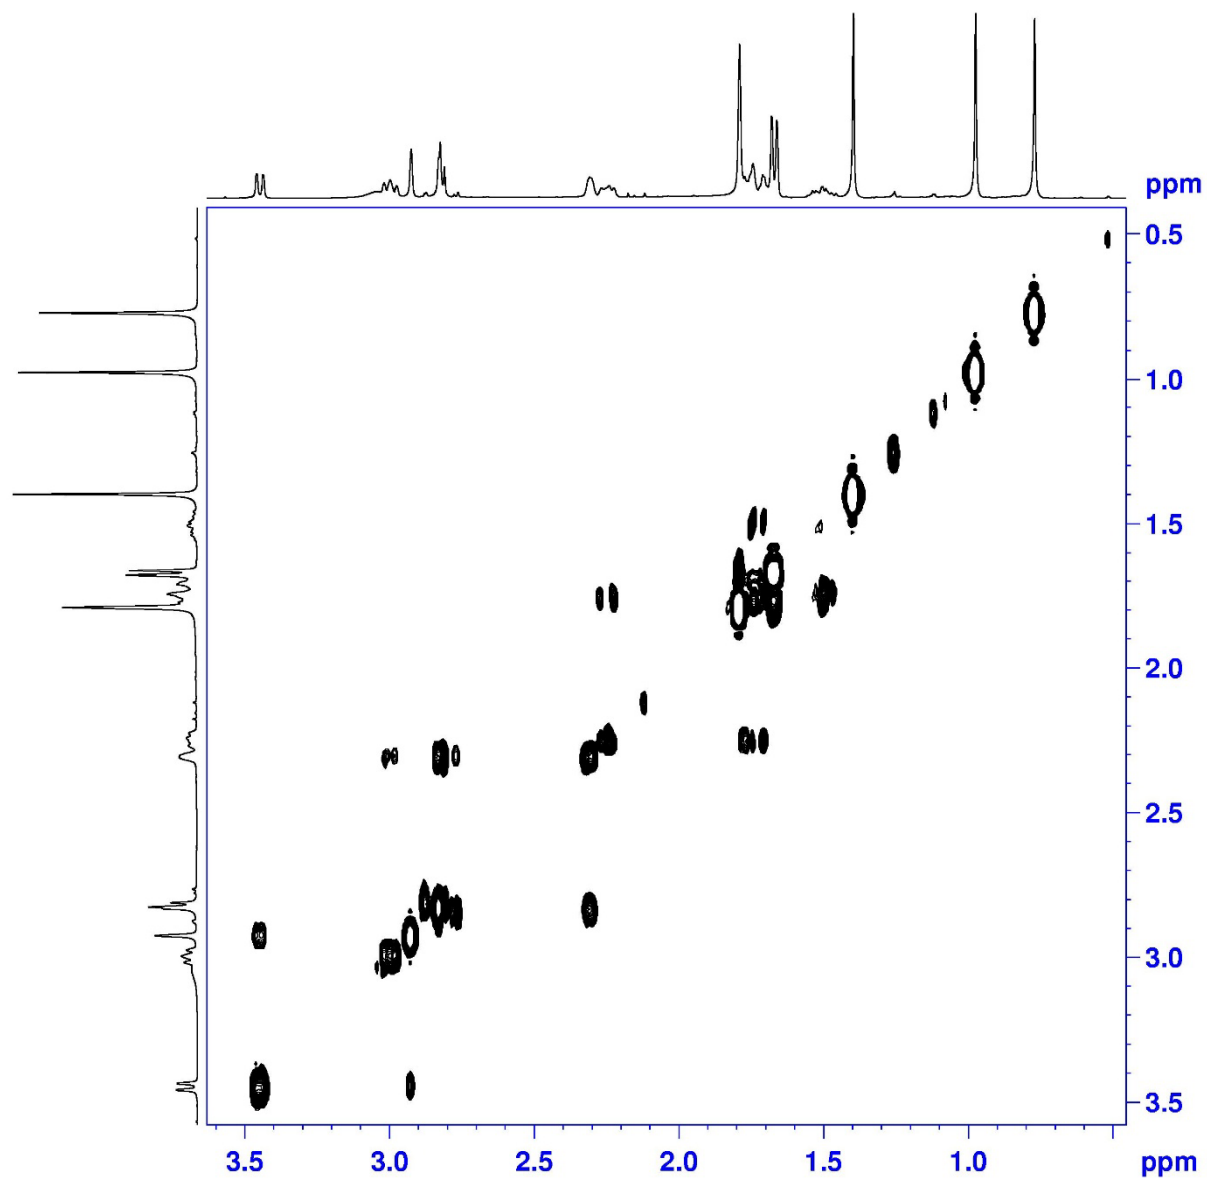



# HSQC (400 MHz) spectrum of compound **1** in CDCl<sub>3</sub>

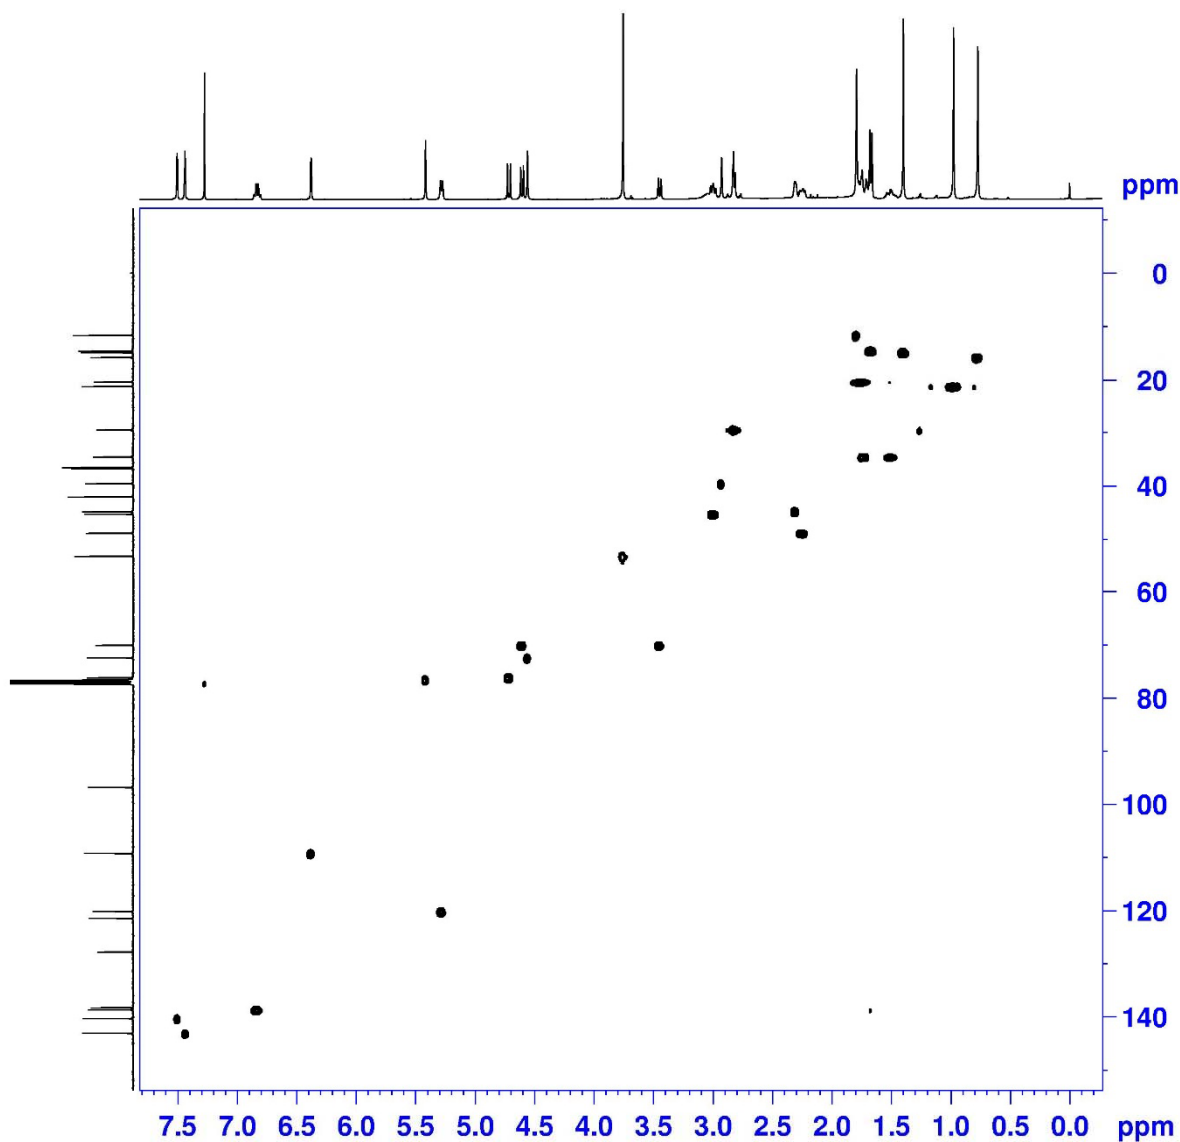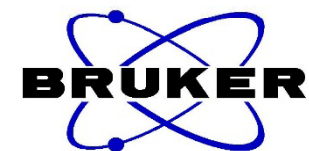

```

NAME      zxp-R-15-3-3
EXPNO     5
PROCNO    1
Date_     20180605
Time      23.36
INSTRUM   spect
PROBHD    5 mm CDPBBO BB
PULPROG   hsqcetgpsi2
TD         1024
SOLVENT   CDCl3
NS         16
DS         16
SWH        4302.926 Hz
FIDRES     4.202076 Hz
AQ         0.1190388 sec
RG         208.5
DW         116.200 usec
DE         10.00 usec
TE         297.0 K
CNST2     145.0000000
D0         0.00000300 sec
D1         1.46497905 sec
D4         0.00172414 sec
D11        0.03000000 sec
D16        0.00020000 sec
D24        0.00086207 sec
IN0        0.00002080 sec
ZGPTNS
    
```

```

----- CHANNEL f1 -----
SFO1      400.1320007 MHz
NUC1       1H
P1         11.50 usec
P2         23.00 usec
P28        0.00 usec
ND0        2
TD         256
SFO1      100.6233 MHz
FIDRES     93.900238 Hz
SW         238.896 ppm
FqMODE     Echo-Antiecho
SI         1024
SF         400.1300023 MHz
WDW        QSINE
SSB        2
LB         0.00 Hz
GB         0
PC         1.40
SI         1024
MC2        echo-antiecho
SF         100.6127540 MHz
WDW        QSINE
SSB        2
LB         0.00 Hz
GB         0
    
```

HSQC (400 MHz) spectrum of compound **1** in CDCl<sub>3</sub>

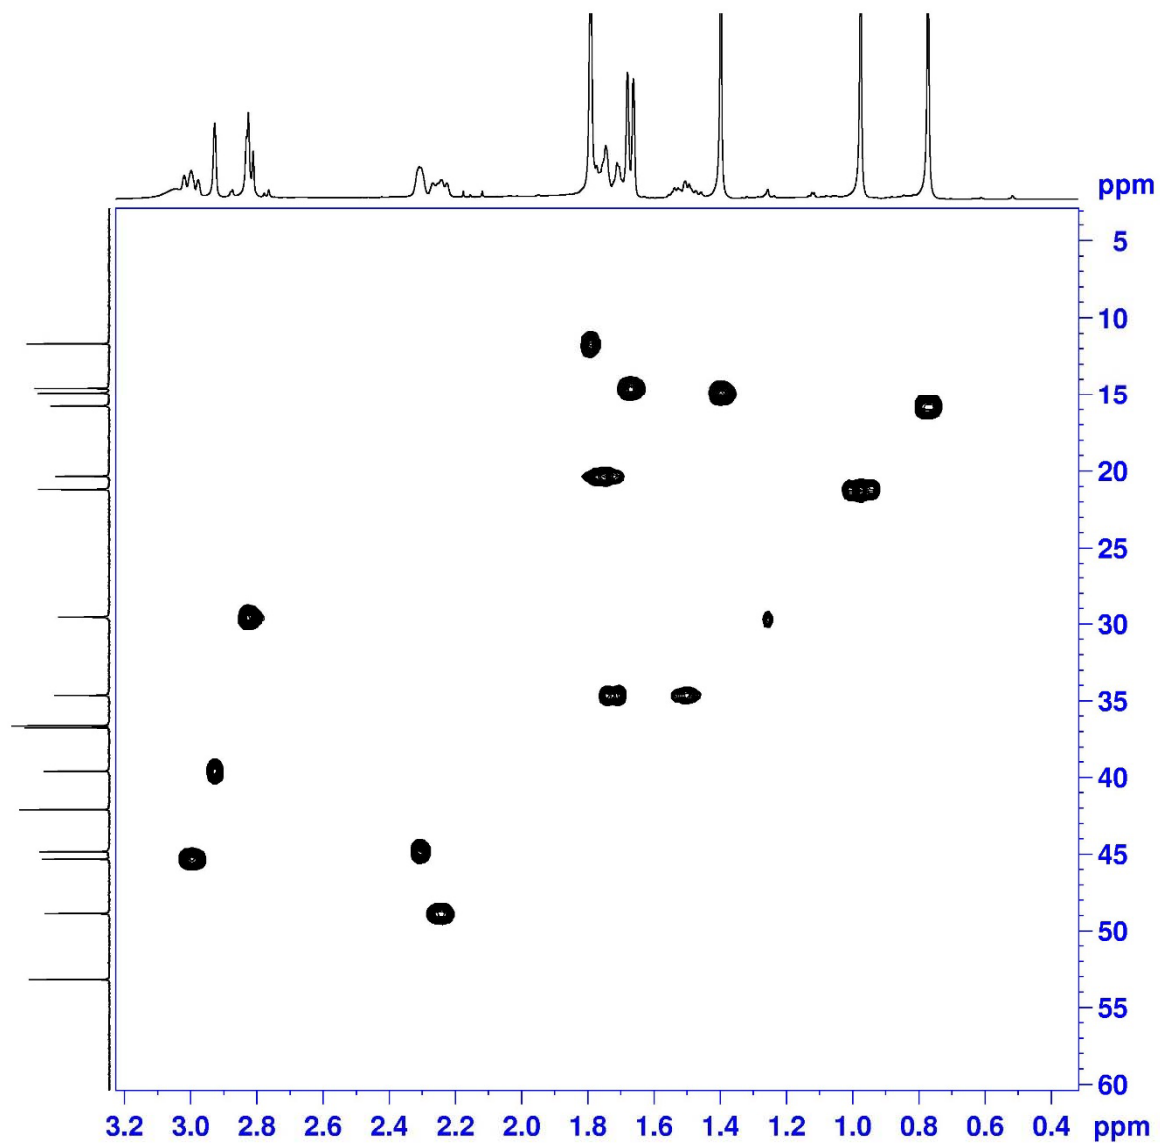

# HMBC (400 MHz) spectrum of compound **1** in CDCl<sub>3</sub>

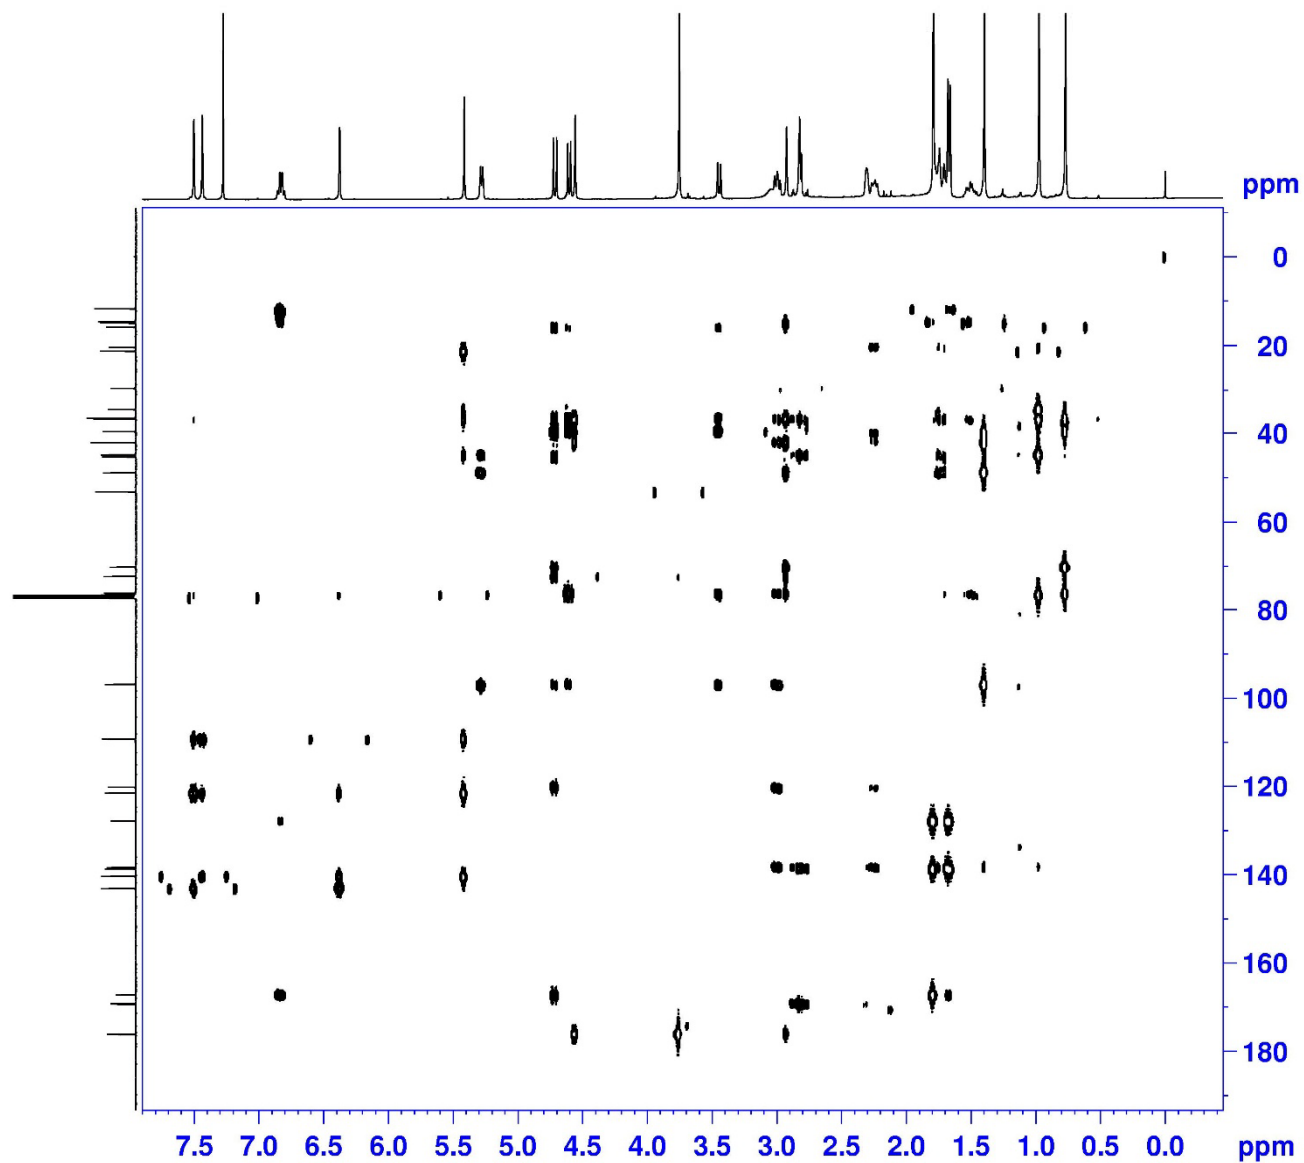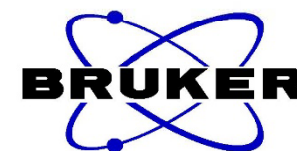

NAME zxp-R-15-3-3  
EXPNO 6  
PROCNO 1  
Date\_ 20180606  
Time 1.27  
INSTRUM spect  
PROBHD 5 mm CPPBBO BB  
PULPROG hmbcgp1pndgf  
TD 4096  
SOLVENT CDCl3  
NS 32  
DS 16  
SWH 5197.505 Hz  
FIDRES 1.268922 Hz  
AQ 0.3940852 sec  
RG 208.5  
DW 96.200 usec  
DE 10.00 usec  
TE 297.0 K  
CNST2 145.0000000  
CNST13 10.0000000  
D0 0.00000300 sec  
D1 1.50000000 sec  
D2 0.00344828 sec  
D6 0.05000000 sec  
D16 0.00020000 sec  
IN0 0.00002080 sec

===== CHANNEL f1 =====  
SFO1 400.1323208 MHz  
NUC1 1H  
P1 11.50 usec  
P2 23.00 usec  
ND0 2  
TD 128  
SFO1 100.6233 MHz  
FIDRES 187.800476 Hz  
SW 238.896 ppm  
FMODE QF  
SI 2048  
SF 400.1300026 MHz  
WDW SINE  
SSB 0  
LB 0.00 Hz  
GB 0  
PC 1.40  
SI 1024  
MC2 QF  
SF 100.6127590 MHz  
WDW SINE  
SSB 0  
LB 0.00 Hz  
GB 0

HMBC (400 MHz) spectrum of compound **1** in CDCl<sub>3</sub>

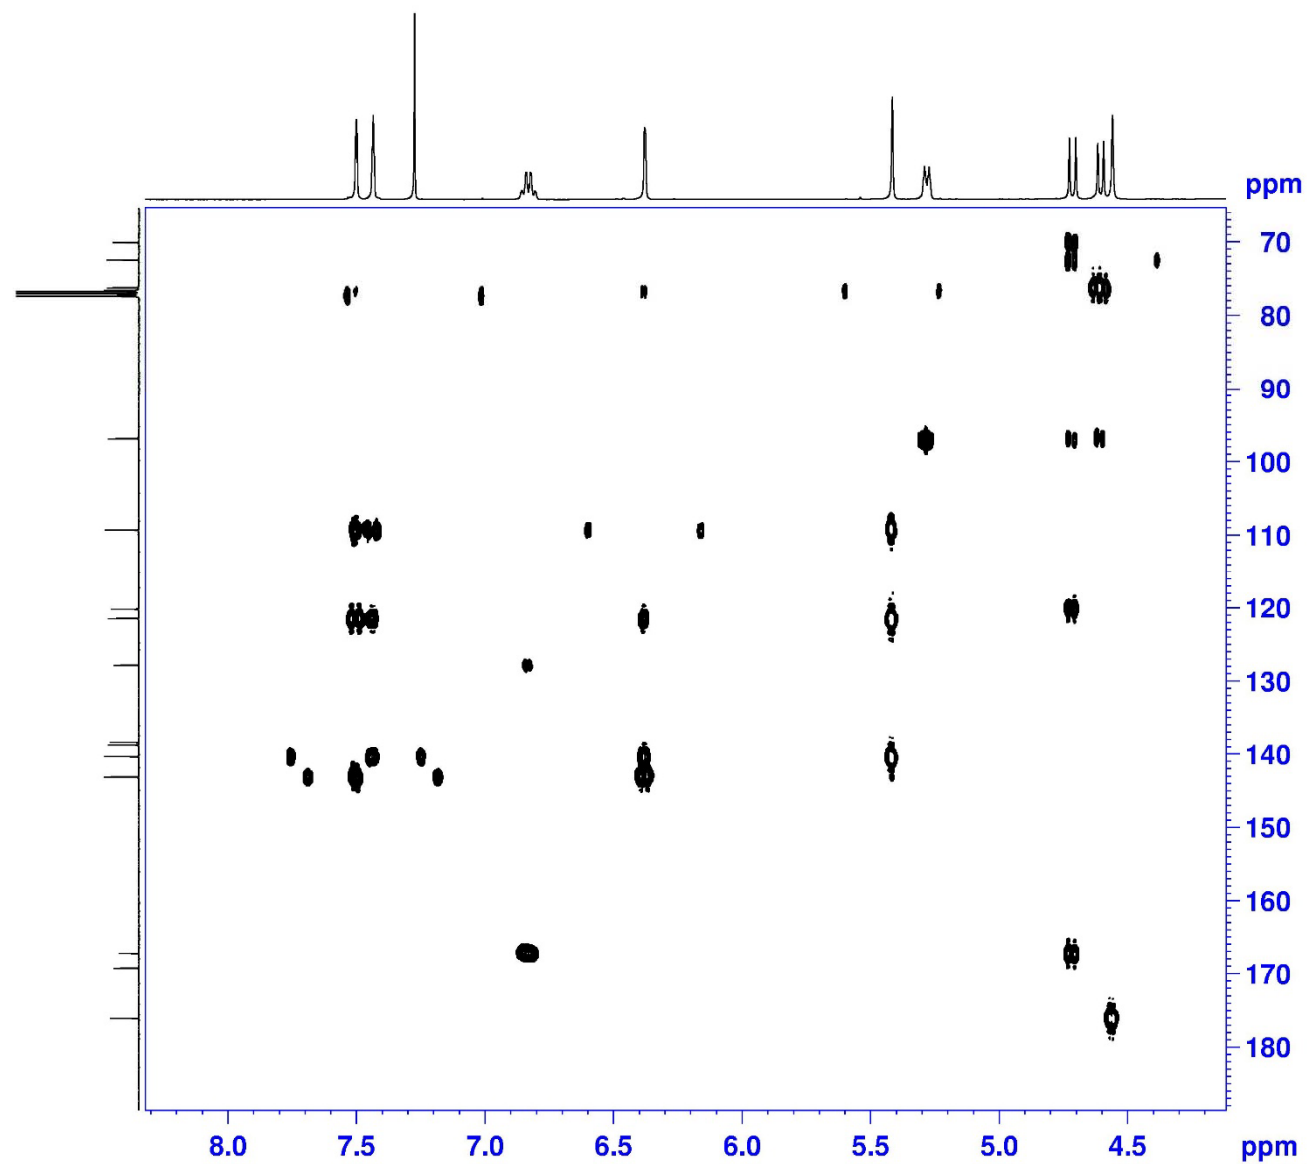

HMBC (400 MHz) spectrum of compound **1** in CDCl<sub>3</sub>

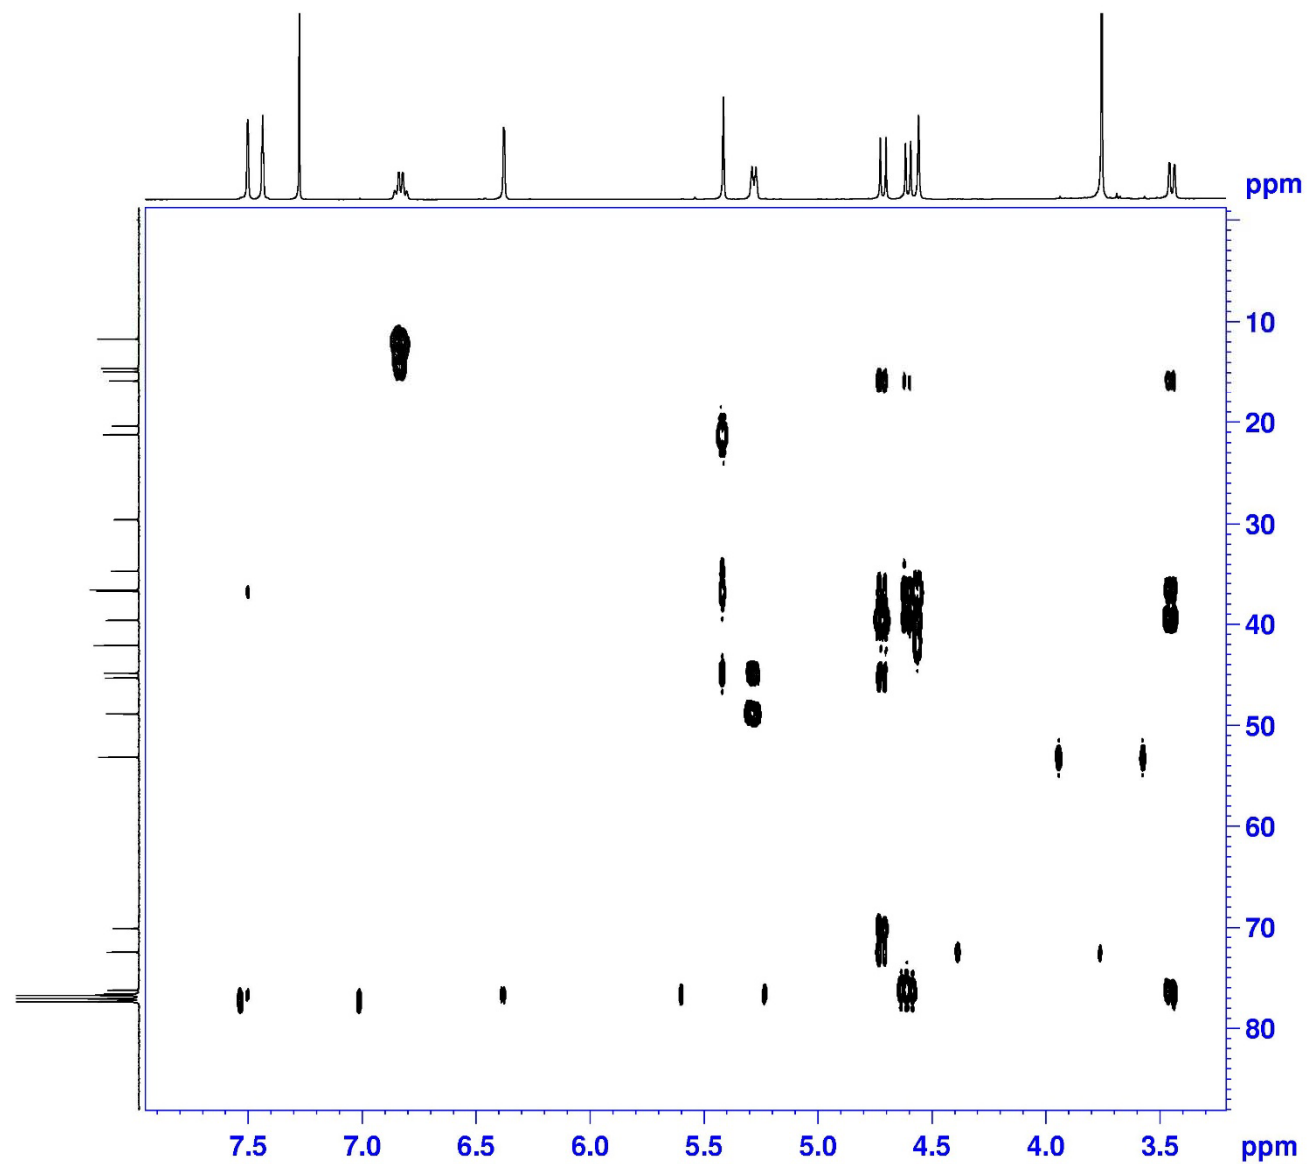

HMBC (400 MHz) spectrum of compound **1** in CDCl<sub>3</sub>

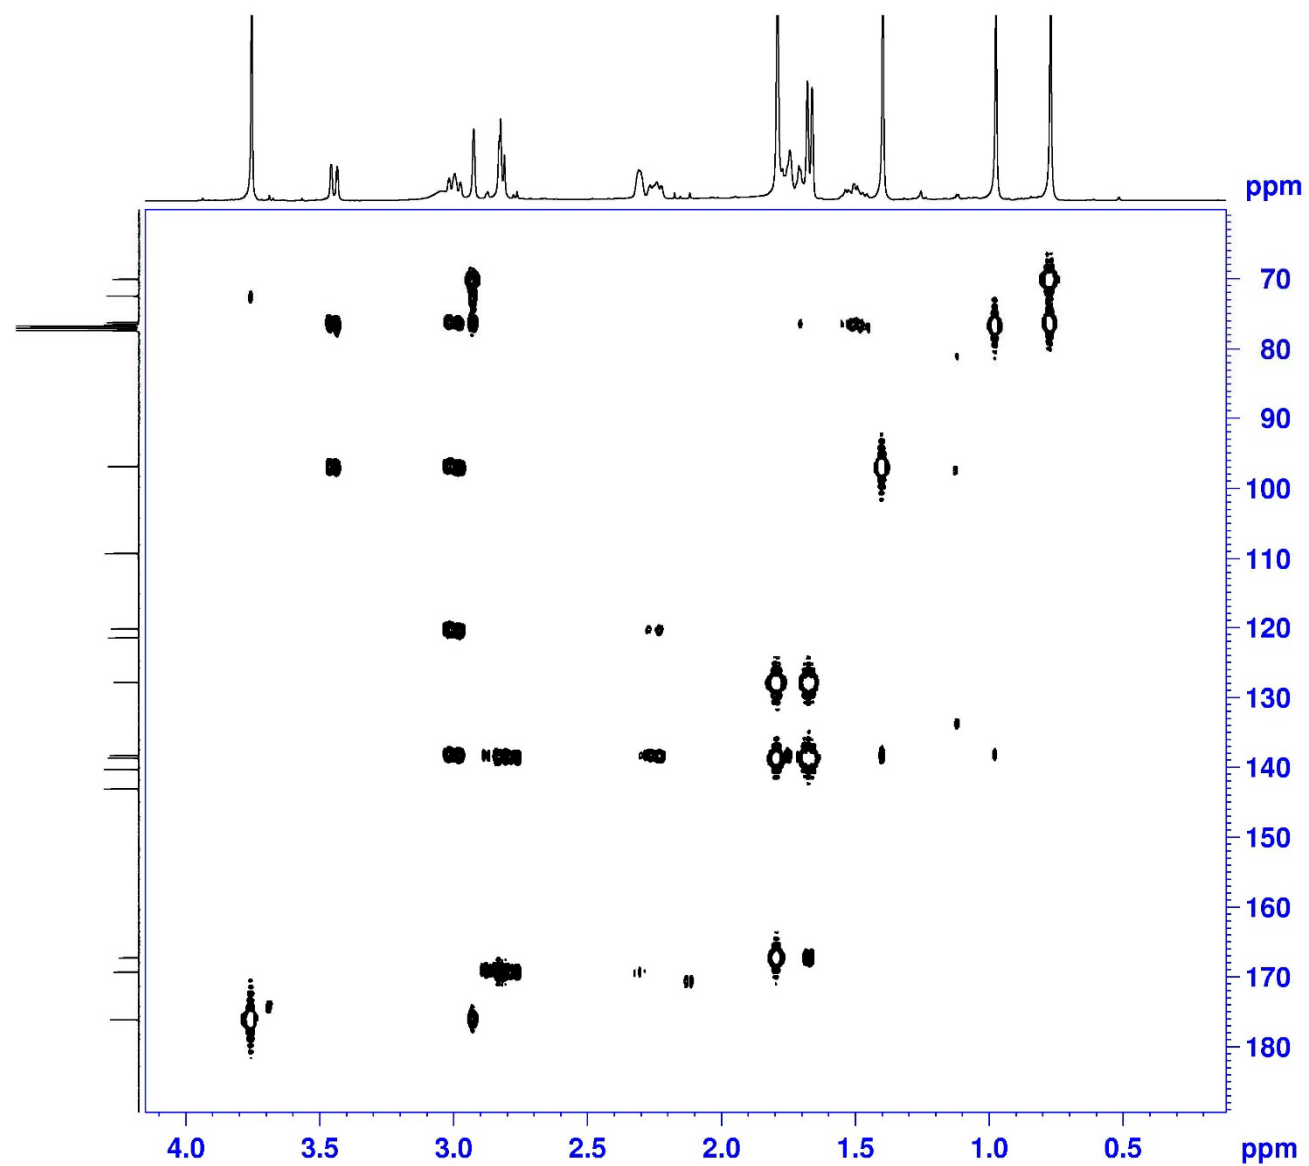

HMBC (400 MHz) spectrum of compound **1** in CDCl<sub>3</sub>

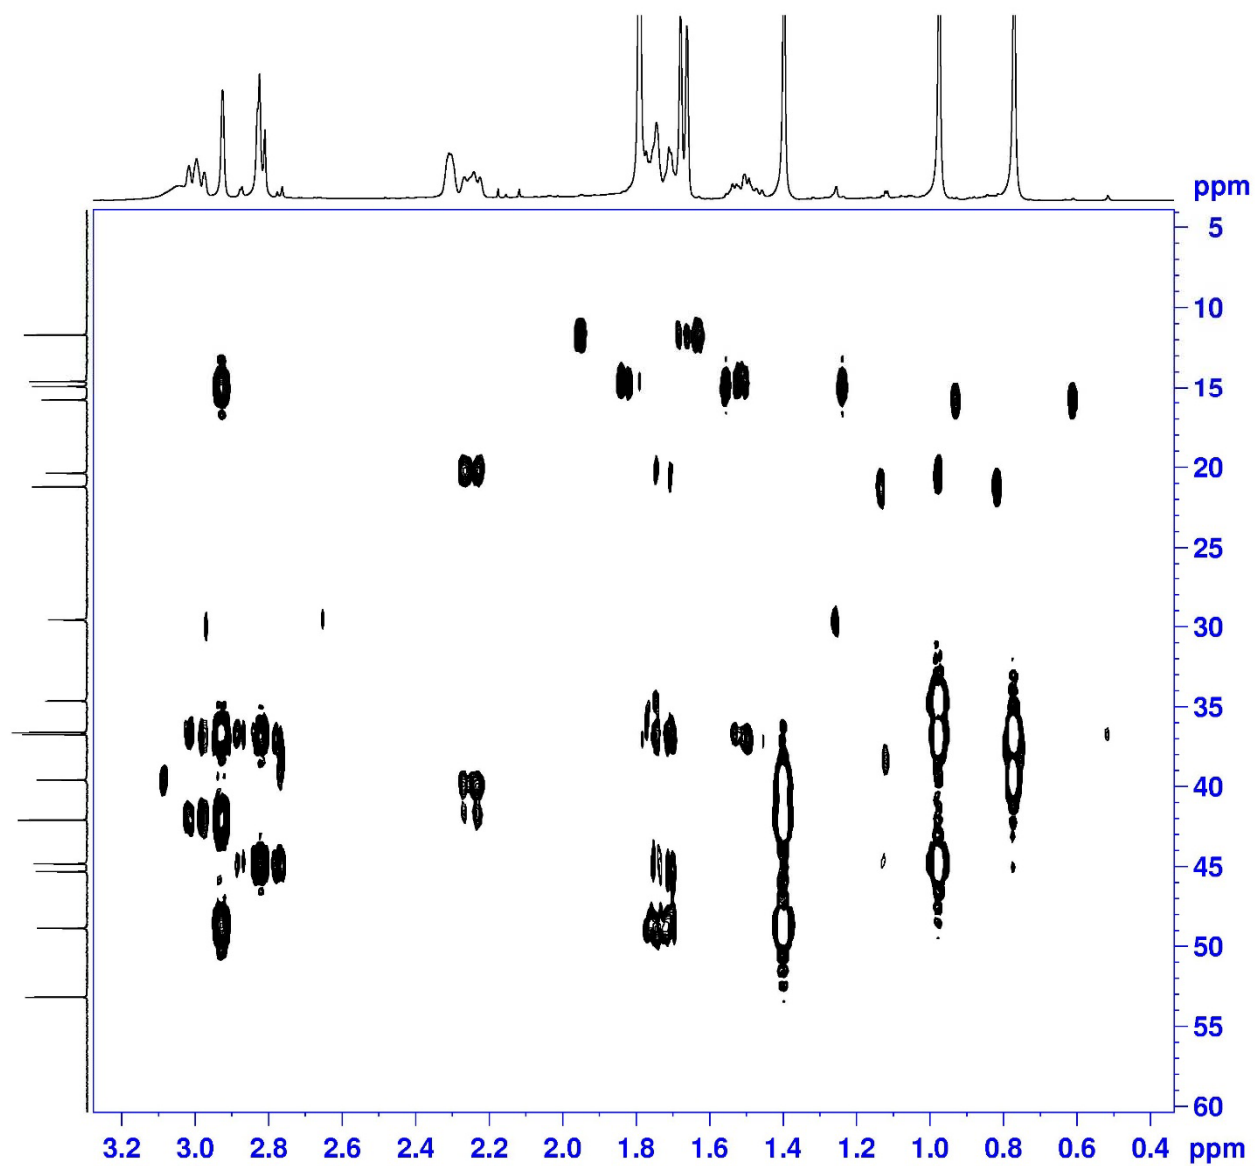

# NOESY (400 MHz) spectrum of compound **1** in CDCl<sub>3</sub>

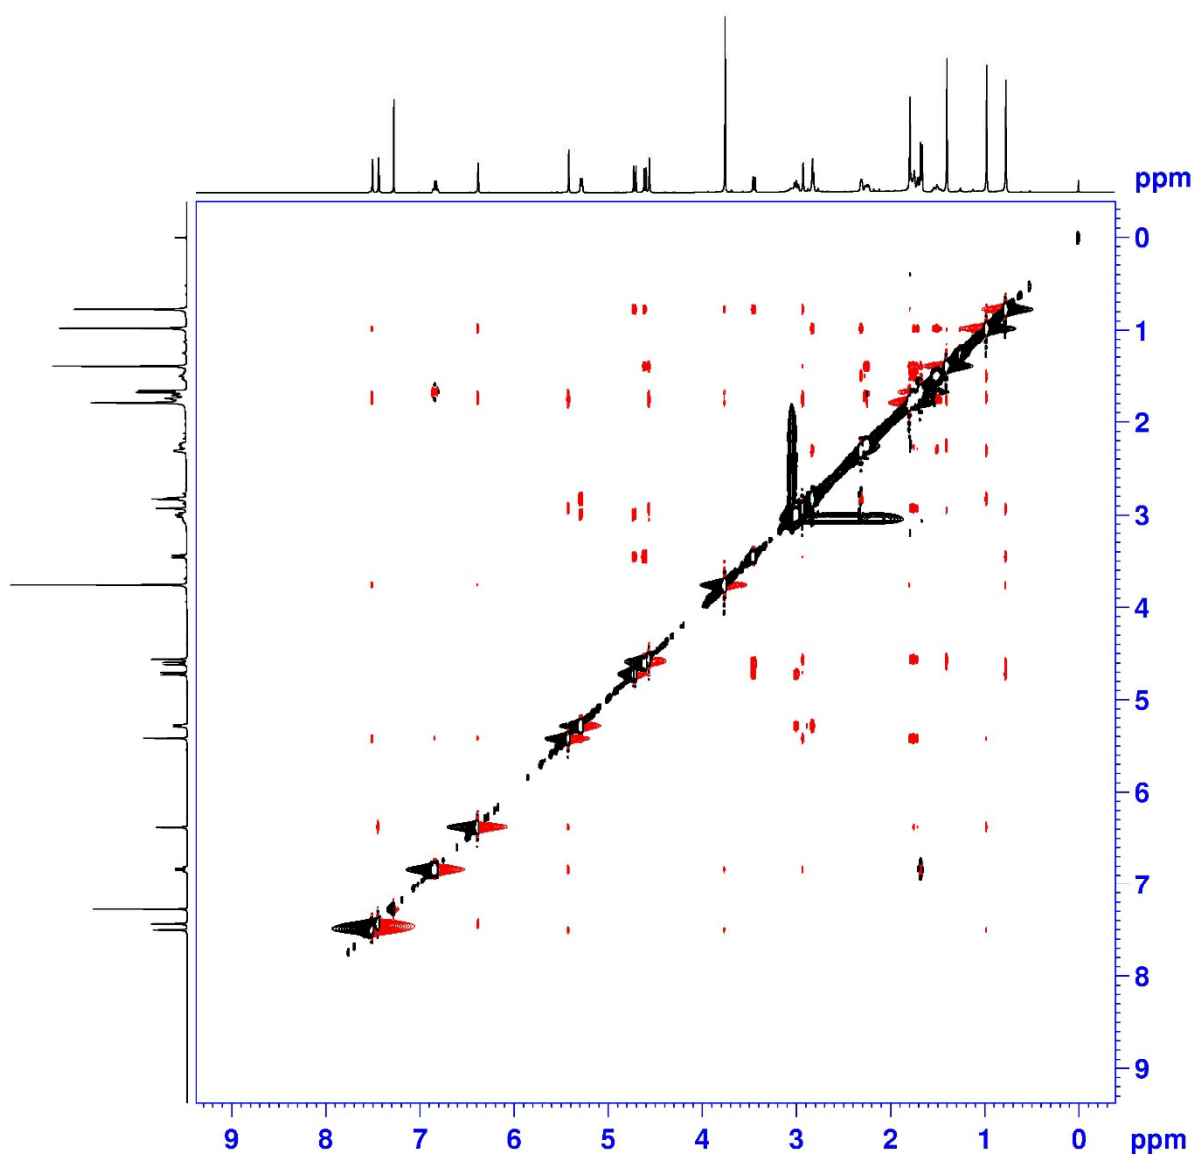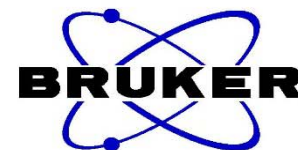

```
NAME      ZXP-R-15-3-3
EXPNO      7
PROCNO     1
Date_      20180606
Time       3.42
INSTRUM    spect
PROBHD     5 mm CPPBBO BB
PULPROG    noesygpphpg
TD         2048
SOLVENT    CDCl3
NS         16
DS         32
SWH        4000.000 Hz
FIDRES     1.953125 Hz
AQ         0.2560500 sec
RG         65.23
DW         125.000 usec
DE         10.00 usec
TE         297.0 K
D0         0.00011036 sec
D1         1.99385595 sec
D8         0.30000001 sec
D11        0.03000000 sec
D12        0.00002000 sec
D16        0.00020000 sec
IN0        0.00025000 sec
```

```
===== CHANNEL f1 =====
SFO1      400.1318006 MHz
NUC1      1H
P1        11.50 usec
P2        23.00 usec
P17       2500.00 usec
ND0       1
TD        256
SFO1      400.1318 MHz
FIDRES    15.625000 Hz
SW        9.997 ppm
FnMODE    States-TPPI
SI        1024
SF        400.1300018 MHz
WDW       QSINE
SSB       2
LB        0.00 Hz
GB        0
PC        1.00
SI        1024
MC2       States-TPPI
SF        400.1300021 MHz
WDW       QSINE
SSB       2
LB        0.00 Hz
GB        0
```



NOESY (400 MHz) spectrum of compound **1** in  $\text{CDCl}_3$

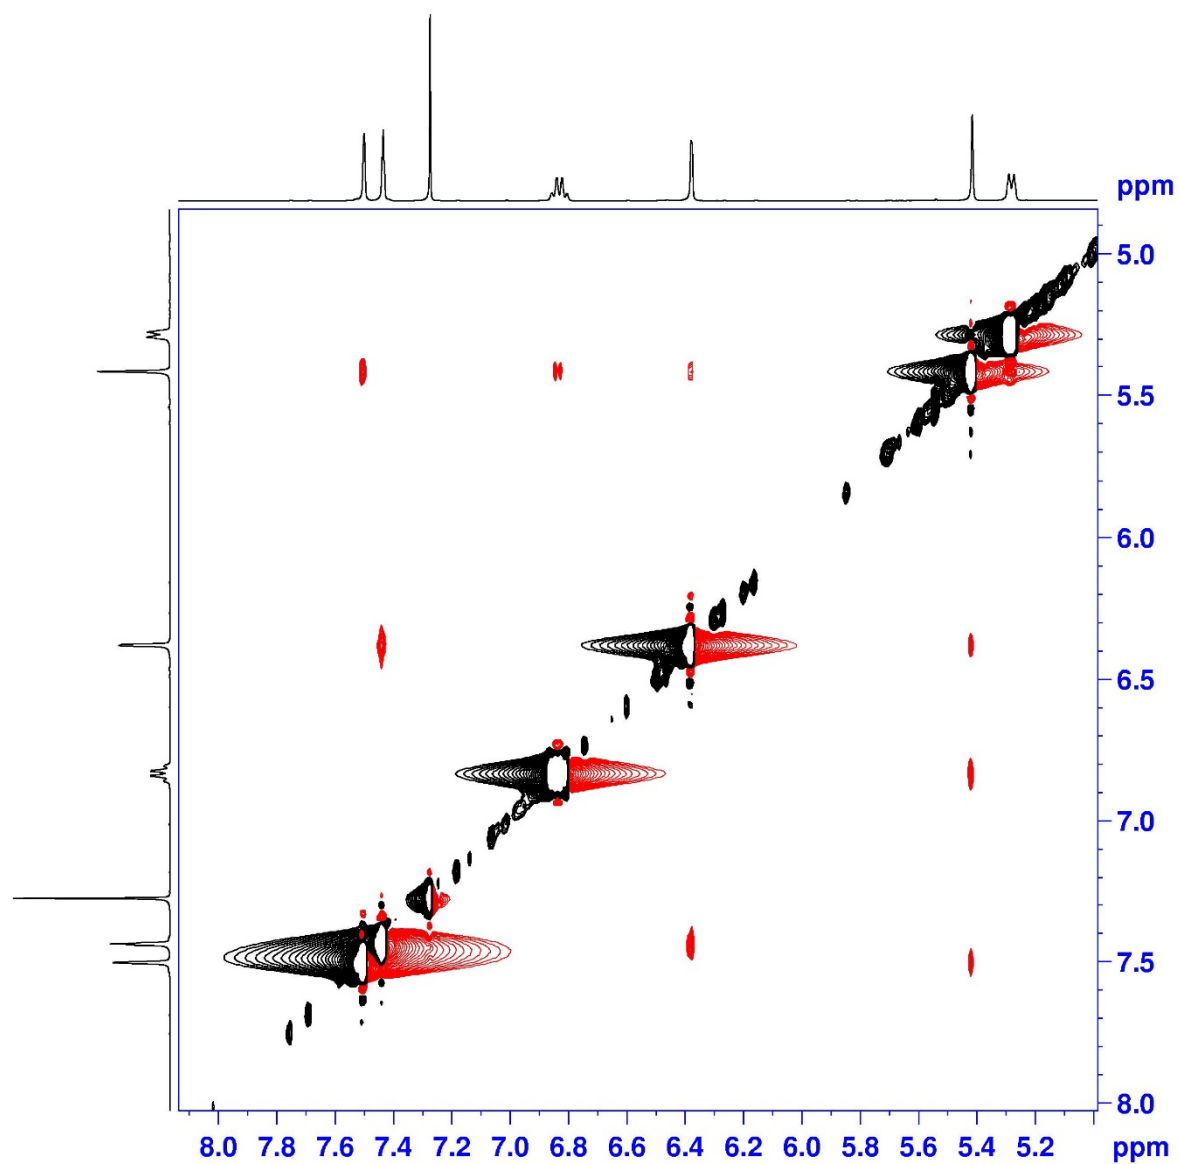

NOESY (400 MHz) spectrum of compound **1** in  $\text{CDCl}_3$

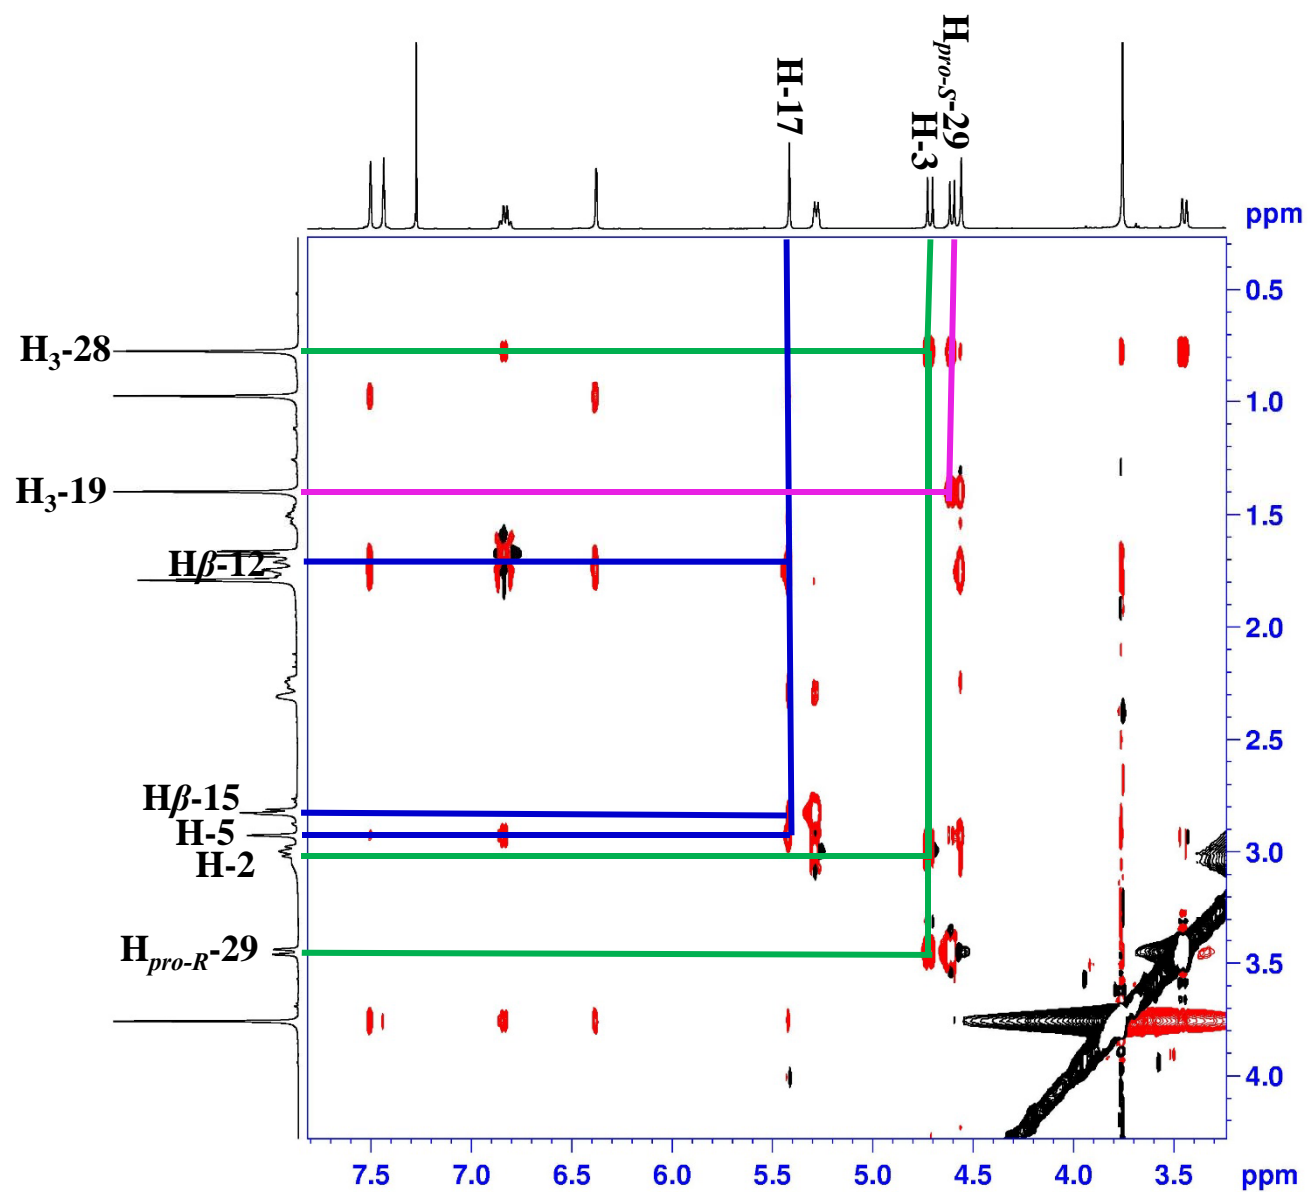

NOESY (400 MHz) spectrum of compound **1** in  $\text{CDCl}_3$

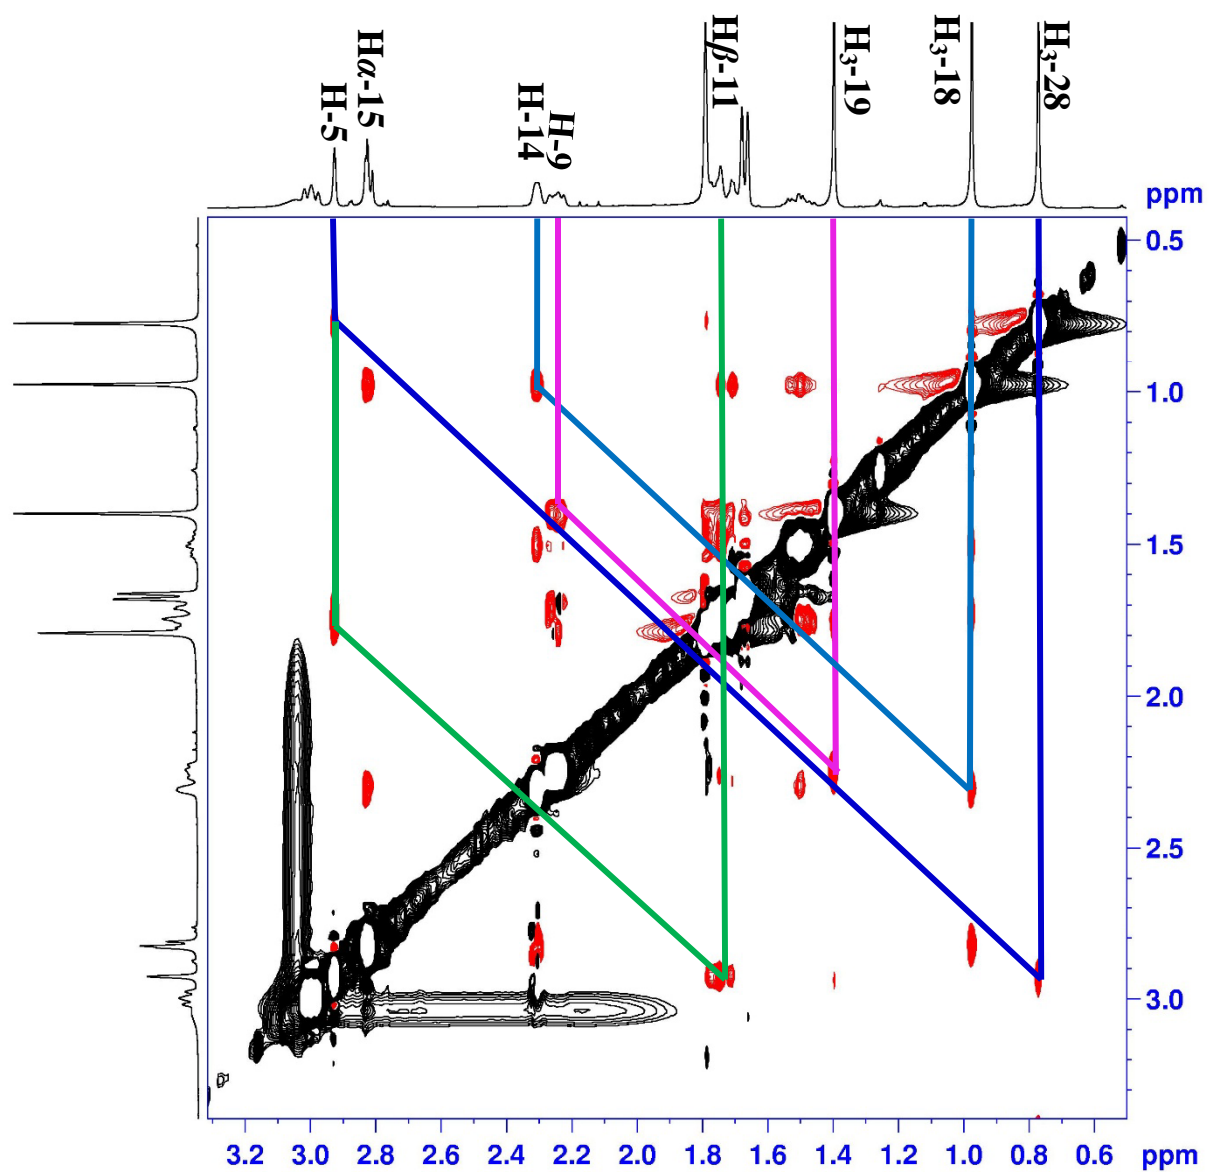

# HR-ESIMS for compound 2

## Generic Display Report

### Analysis Info

Analysis Name D:\Data\MS\data\201809\zhouxiaopeng\_ZXP-3\_pos\_5\_01\_5427.d  
Method LC\_Direct Infusion\_pos\_100-1000mz.m  
Sample Name zhouxiaopeng\_ZXP-3\_pos  
Comment

Acquisition Date 9/7/2018 5:05:23 PM

Operator SCSIO  
Instrument maXis

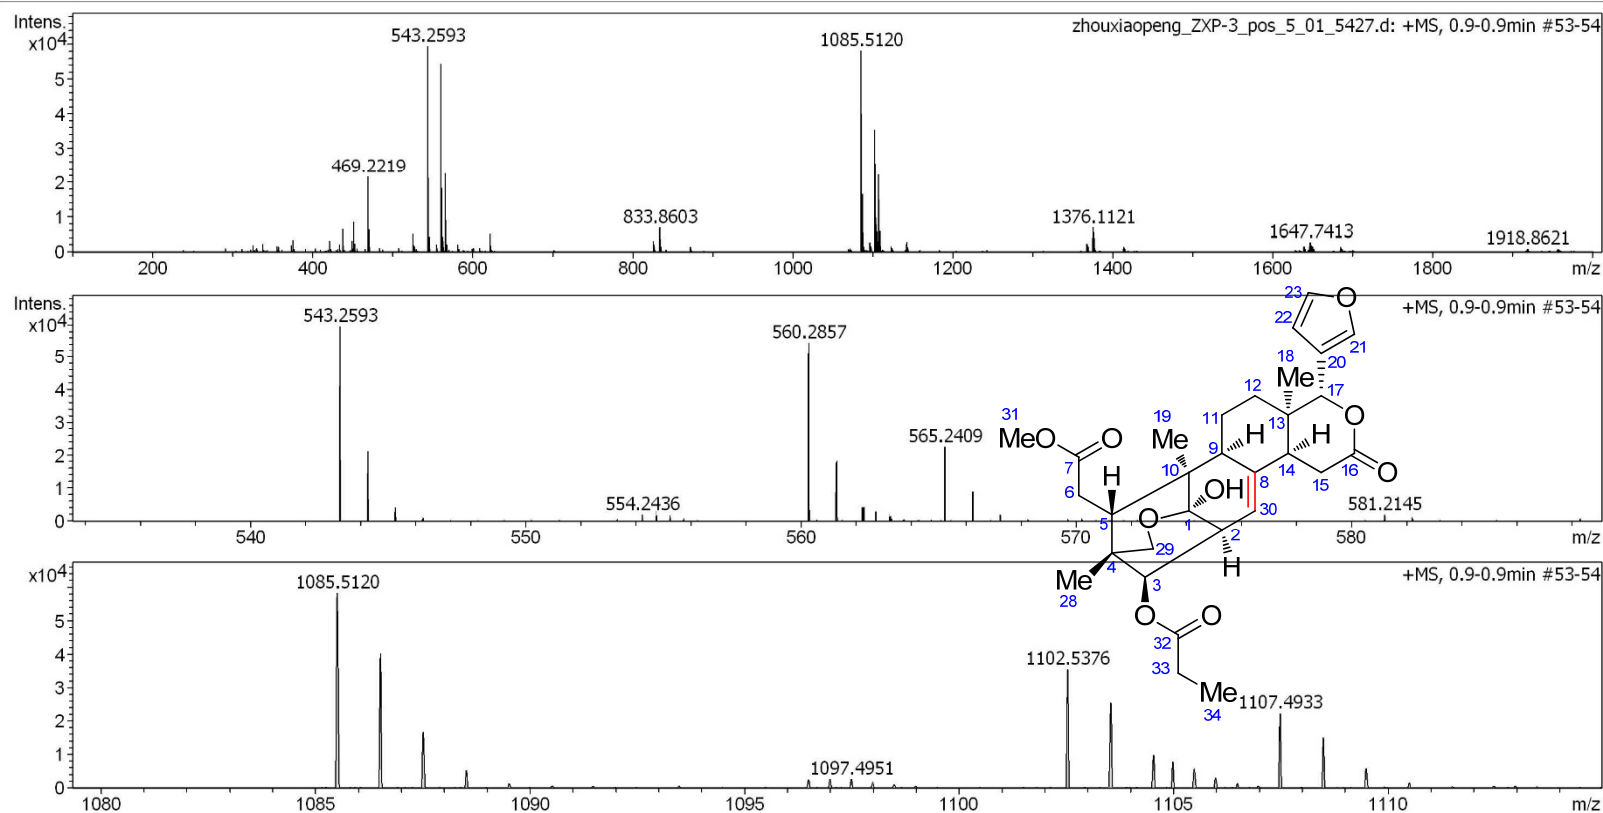

# HR-ESIMS for compound 2

## Mass Spectrum SmartFormula Report

### Analysis Info

Analysis Name D:\Data\MS\data\201809\zhouxiaopeng\_ZXP-3\_pos\_5\_01\_5427.d  
 Method LC\_Direct Infusion\_pos\_100-1000mz.m  
 Sample Name zhouxiaopeng\_ZXP-3\_pos  
 Comment

Acquisition Date 9/7/2018 5:05:23 PM  
 Operator SCSIO  
 Instrument maXis 255552.00029

### Acquisition Parameter

|             |          |                      |          |                  |           |
|-------------|----------|----------------------|----------|------------------|-----------|
| Source Type | ESI      | Ion Polarity         | Positive | Set Nebulizer    | 0.4 Bar   |
| Focus       | Active   | Set Capillary        | 4500 V   | Set Dry Heater   | 180 °C    |
| Scan Begin  | 100 m/z  | Set End Plate Offset | -500 V   | Set Dry Gas      | 4.0 l/min |
| Scan End    | 2000 m/z | Set Charging Voltage | 0 V      | Set Divert Valve | Waste     |
|             |          | Set Corona           | 0 nA     | Set APCI Heater  | 0 °C      |

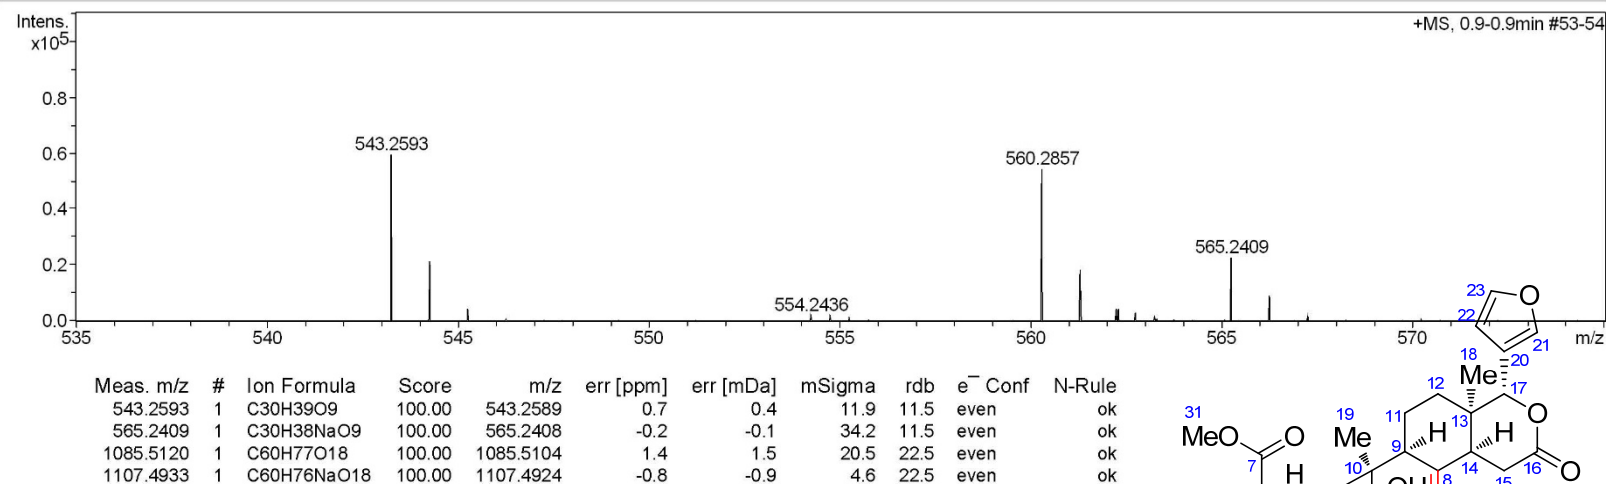

zhouxiaopeng\_ZXP-3\_pos\_5\_01\_5427.d  
 Bruker Compass DataAnalysis 4.1

printed: 9/7/2018 5:08:48 PM

by: SCSIO

Page 1 of 1

$^1\text{H}$  NMR (400 MHz) spectrum of compound **2** in  $\text{CDCl}_3$

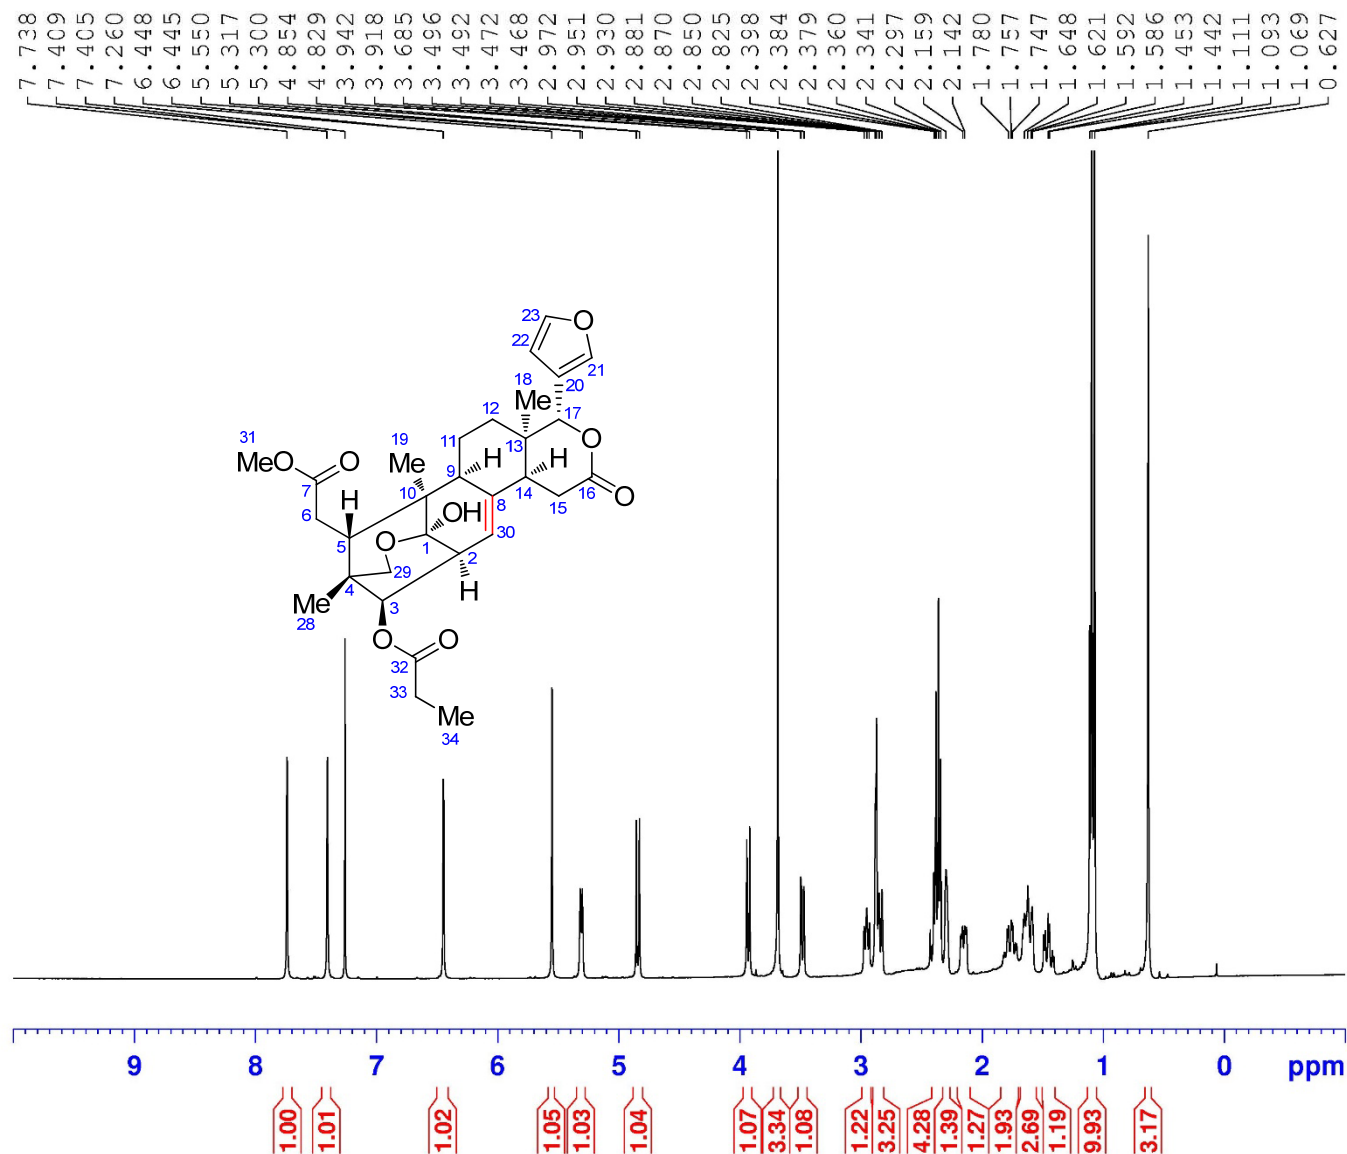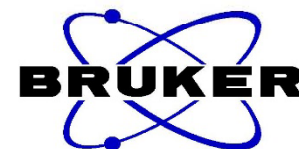

```

NAME      ZXP-R-17-4-2-2-2
EXPNO     1
PROCNO    1
Date_     20180818
Time      13.44
INSTRUM   spect
PROBHD    5 mm CPPBBO BB
PULPROG   zg30
TD        65536
SOLVENT   CDCl3
NS         16
DS         2
SWH        8223.685 Hz
FIDRES     0.125483 Hz
AQ         3.9846387 sec
RG         117.37
DW         60.800 usec
DE         10.00 usec
TE         297.0 K
D1         1.00000000 sec
TD0        1

===== CHANNEL f1 =====
SF01      400.1324710 MHz
NUC1       1H
P1         11.50 usec
SI         65536
SF         400.1300095 MHz
WDW        EM
SSB        0
LB         0.30 Hz
GB         0
PC         1.00
    
```

$^1\text{H}$  NMR (400 MHz) spectrum of compound **2** in  $\text{CDCl}_3$

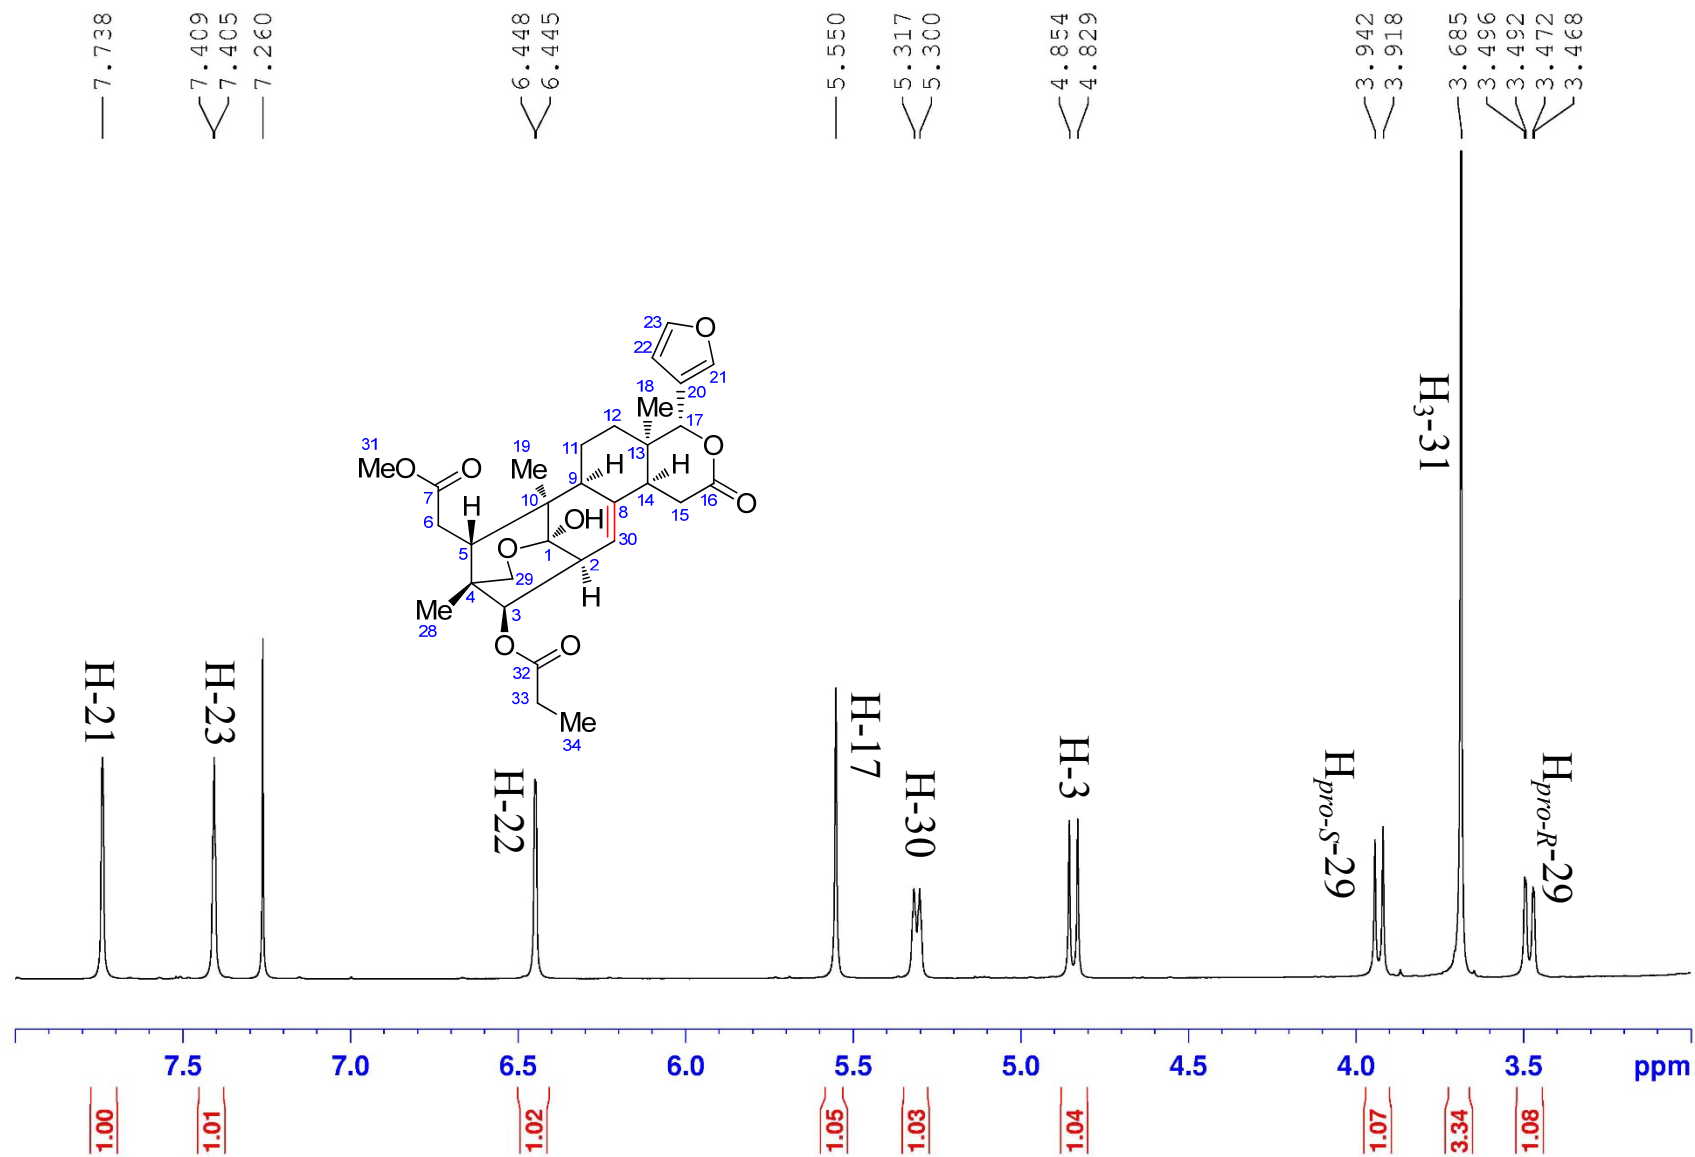

$^1\text{H}$  NMR (400 MHz) spectrum of compound **2** in  $\text{CDCl}_3$

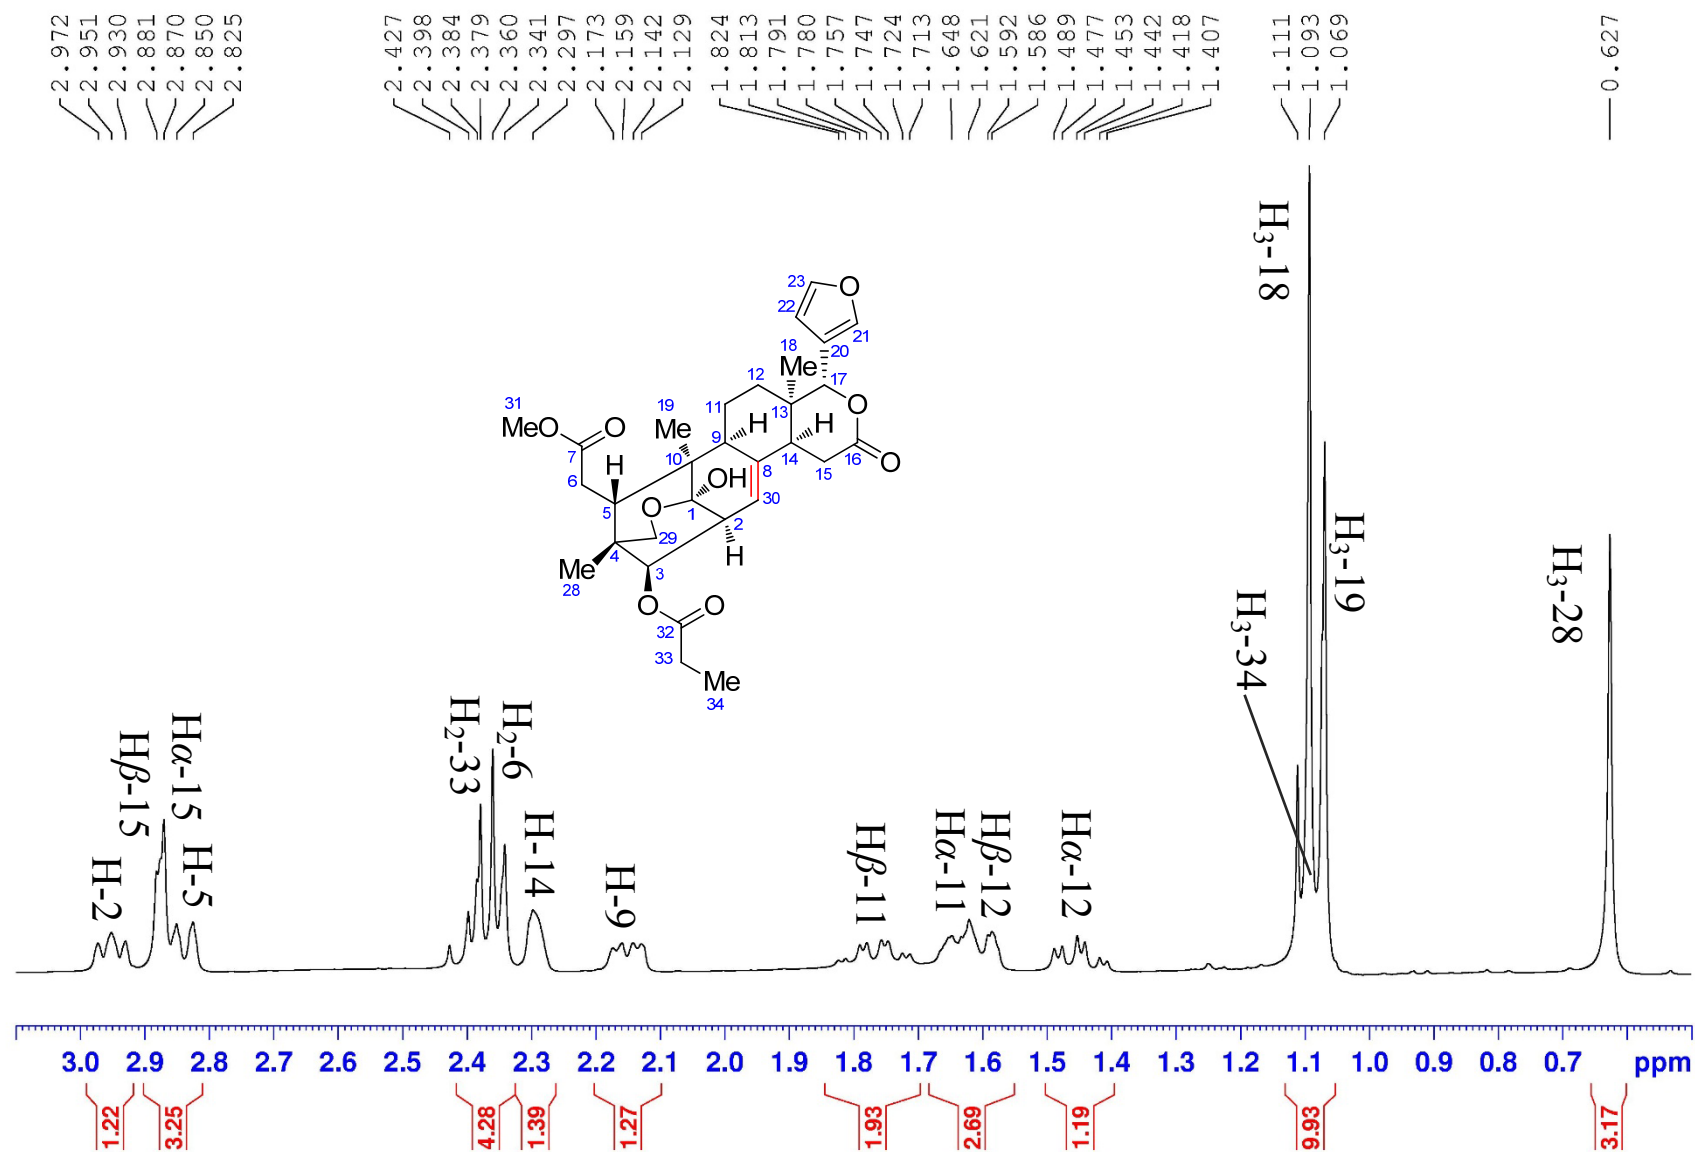



$^{13}\text{C}$  NMR (100 MHz) spectrum of compound **2** in  $\text{CDCl}_3$

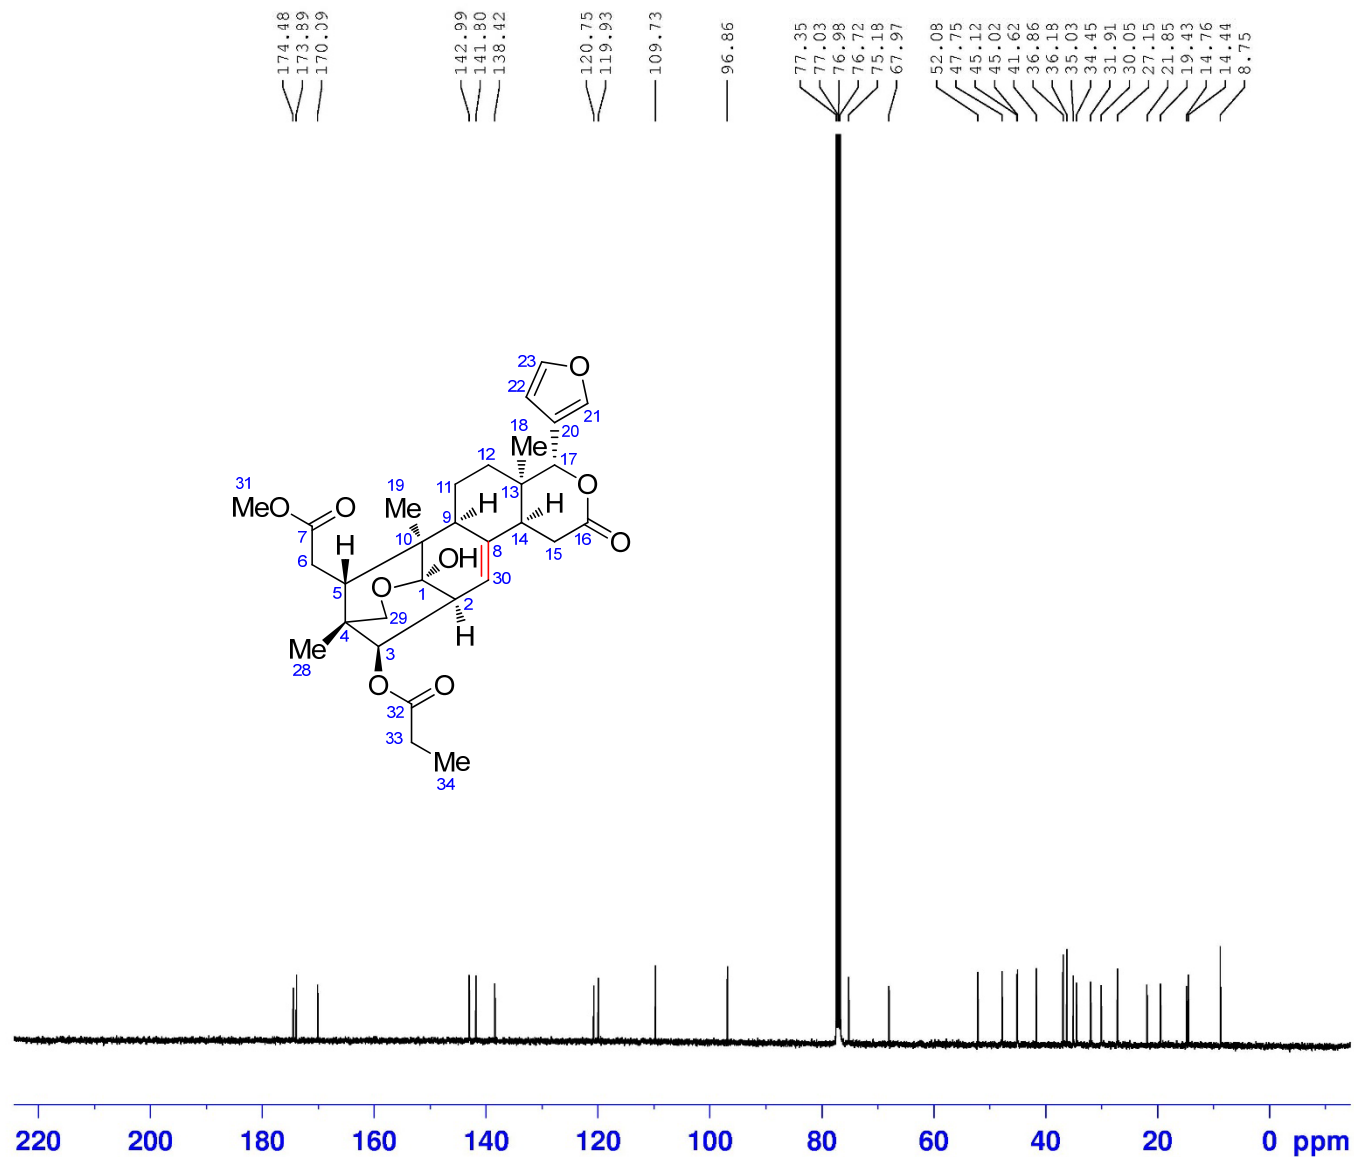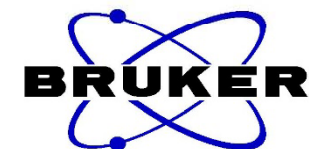

NAME ZXP-R-17-4-2-2-2  
 EXPNO 2  
 PROCNO 1  
 Date\_ 20180818  
 Time 14.44  
 INSTRUM spect  
 PROBHD 5 mm CPPBBO BB  
 PULPROG zgpg30  
 TD 65536  
 SOLVENT  $\text{CDCl}_3$   
 NS 1024  
 DS 4  
 SWH 24038.461 Hz  
 FIDRES 0.366798 Hz  
 AQ 1.3631988 sec  
 RG 130.26  
 DW 20.800 usec  
 DE 18.00 usec  
 TE 297.0 K  
 D1 2.00000000 sec  
 D11 0.03000000 sec  
 TD0 1

===== CHANNEL f1 =====  
 SFO1 100.6233324 MHz  
 NUC1 13C  
 P1 10.00 usec  
 SI 32768  
 SF 100.6127692 MHz  
 WDW EM  
 SSB 0  
 LB 1.00 Hz  
 GB 0  
 PC 1.40

$^{13}\text{C}$  NMR (100 MHz) spectrum of compound **2** in  $\text{CDCl}_3$

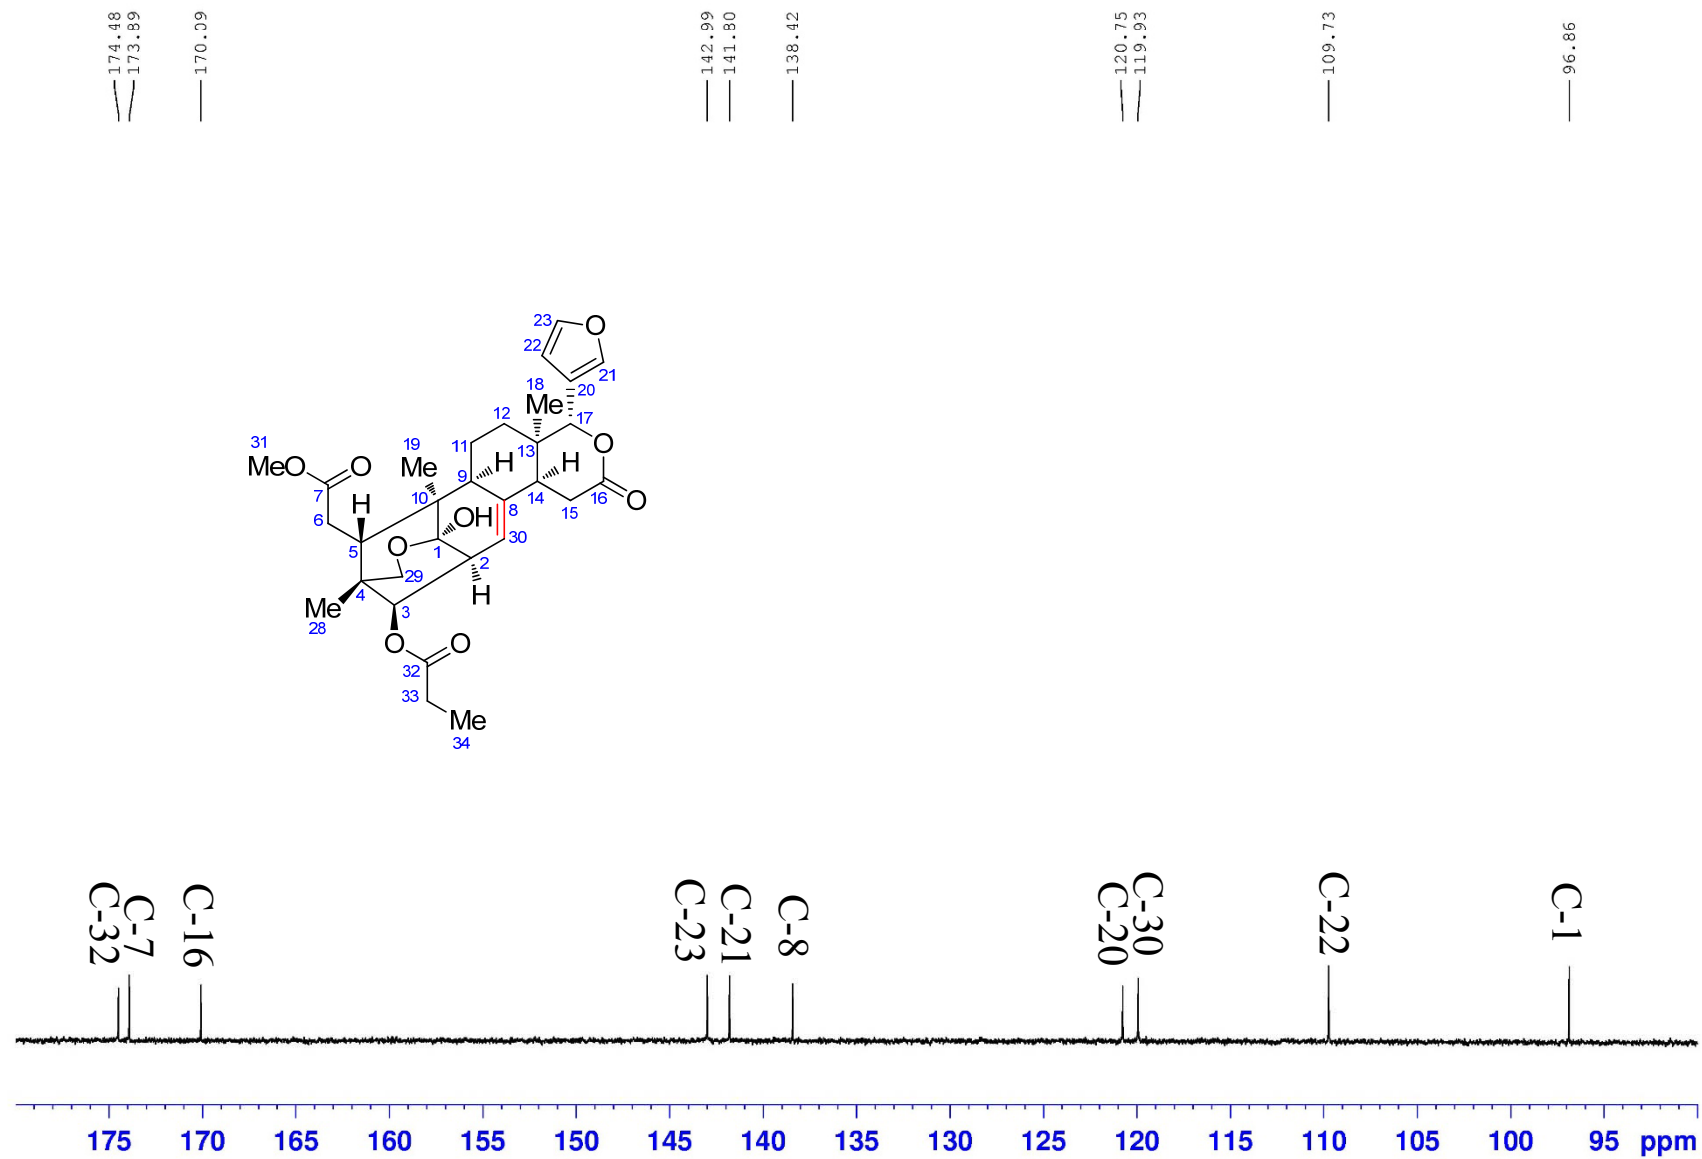

$^{13}\text{C}$  NMR (100 MHz) spectrum of compound **2** in  $\text{CDCl}_3$

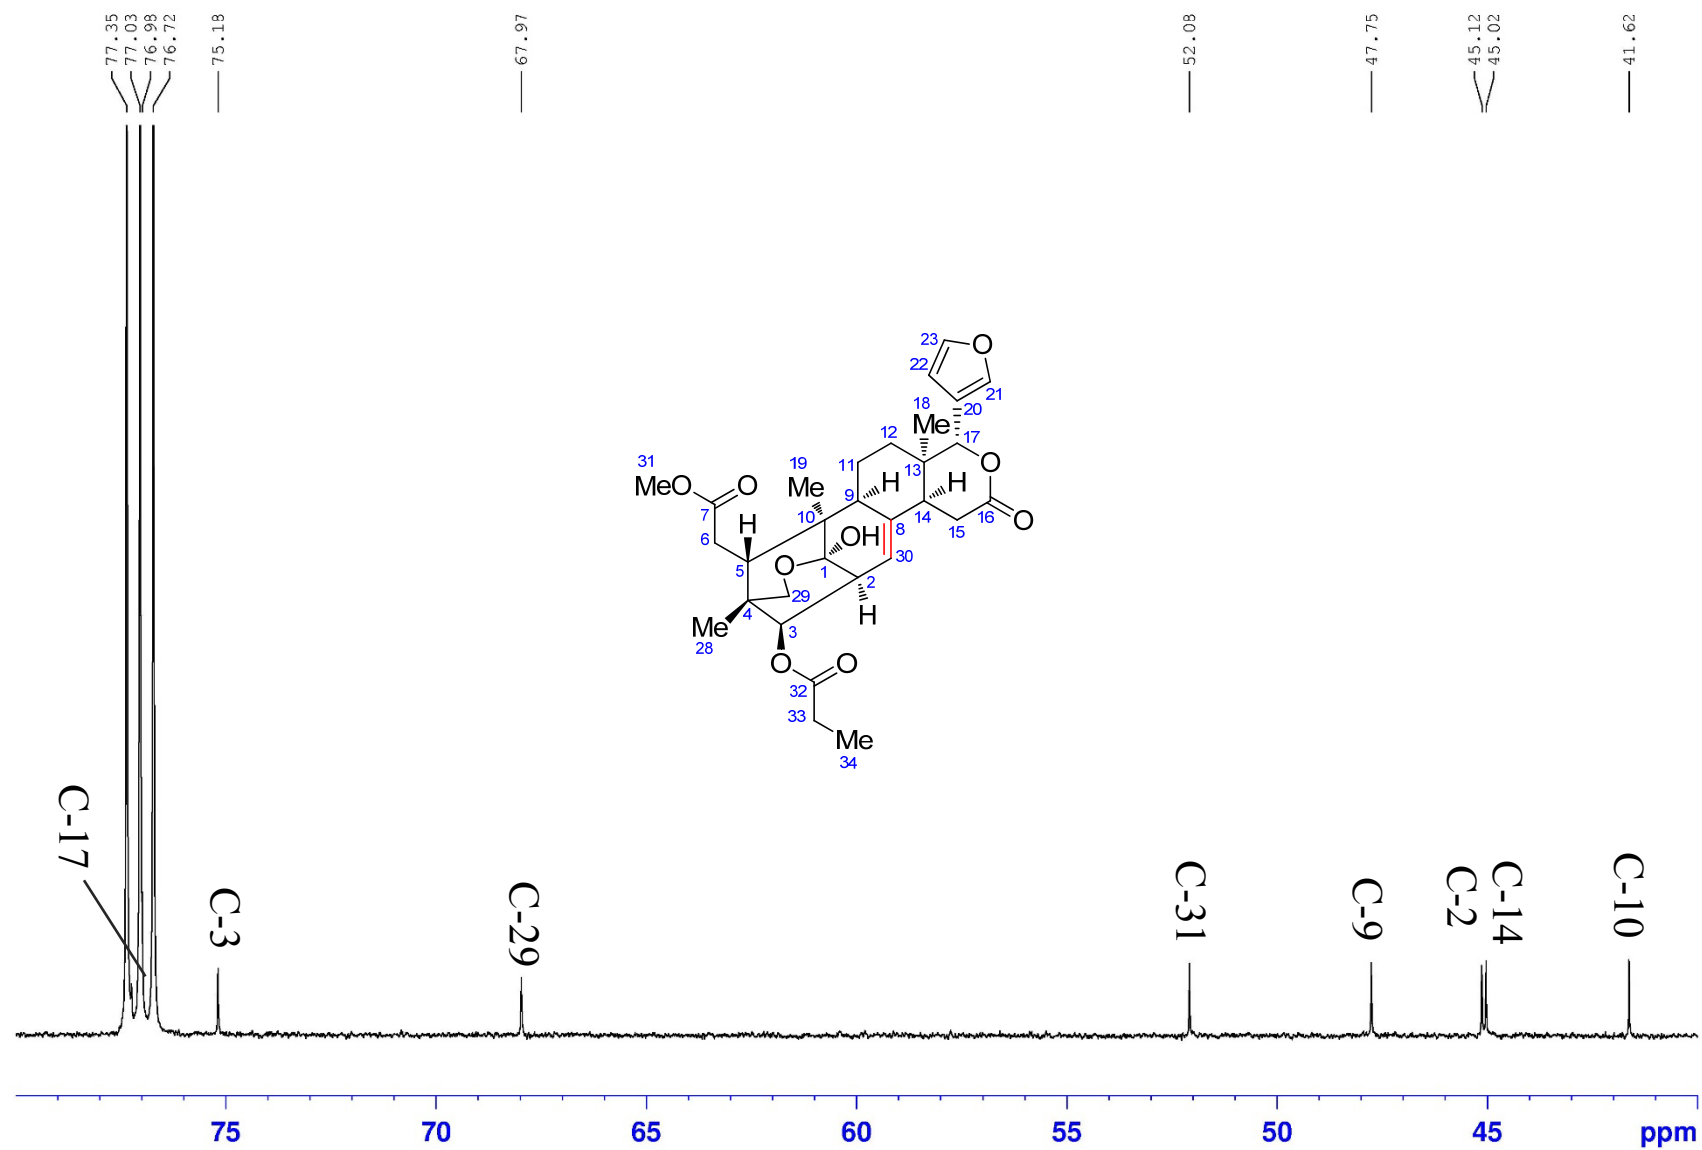

$^{13}\text{C}$  NMR (100 MHz) spectrum of compound **2** in  $\text{CDCl}_3$

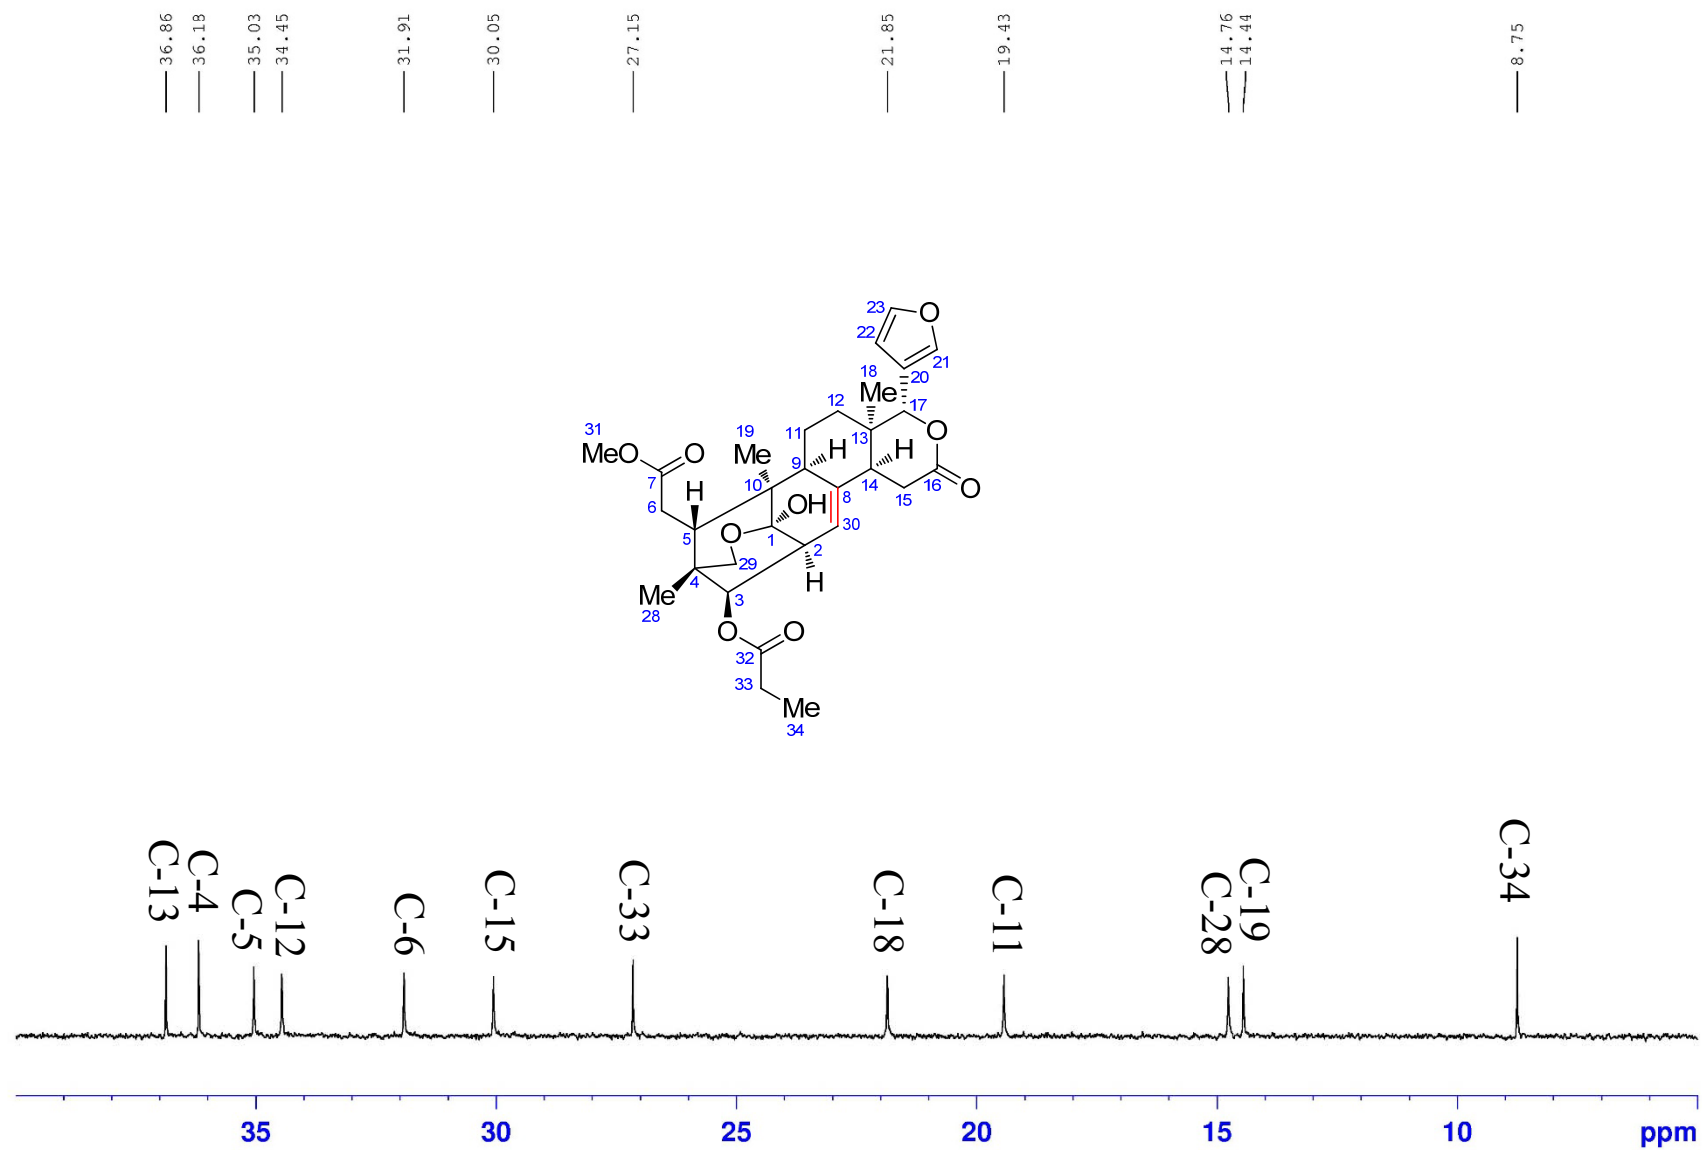

# DEPT135 (100 MHz) spectrum of compound **2** in CDCl<sub>3</sub>

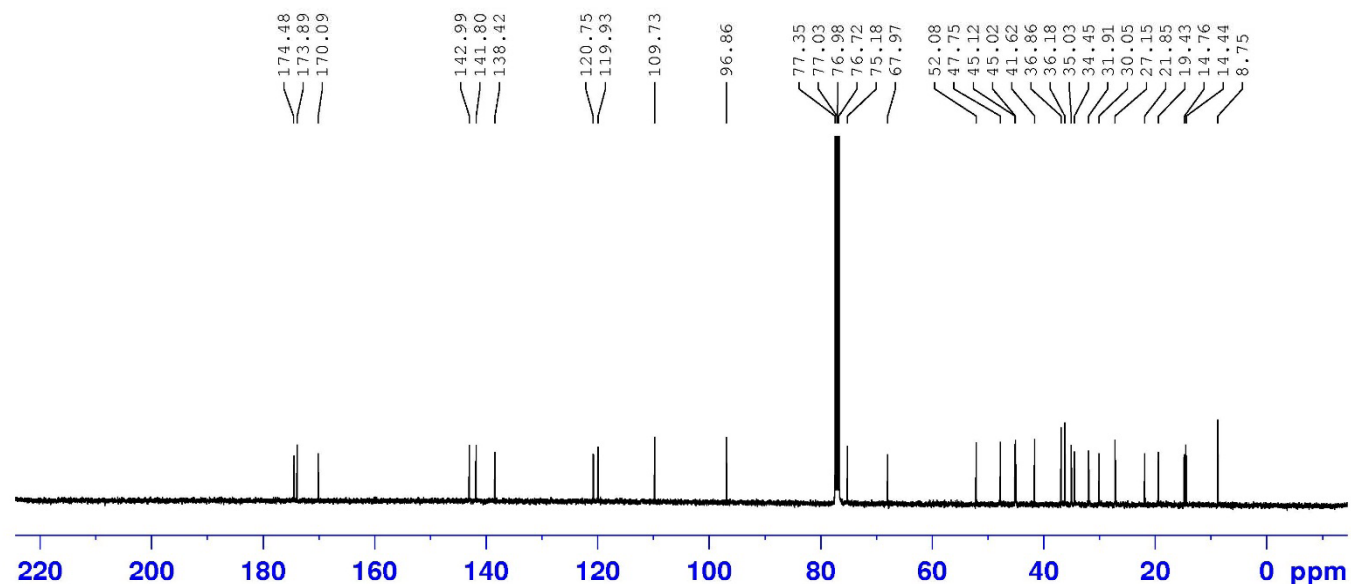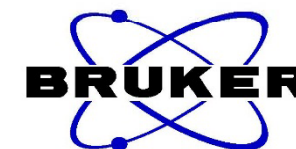

NAME 7XP-R-17-4-2-2-2  
 EXPNO 2  
 PROCNO 1  
 Date\_ 20180818  
 Time 14.44  
 INSTRUM spect  
 PROBHD 5 mm CPMBO BB  
 PULPROG zgpg30  
 TD 65536  
 SOLVENT CDCl3  
 NS 1024  
 DS 4  
 SWH 24038.461 Hz  
 FIDRES 0.366798 Hz  
 AQ 1.3631988 sec  
 RG 130.26  
 DW 20.800 usec  
 DE 18.00 usec  
 TE 297.0 K  
 D1 2.00000000 sec  
 D11 0.03000000 sec  
 TD0 1

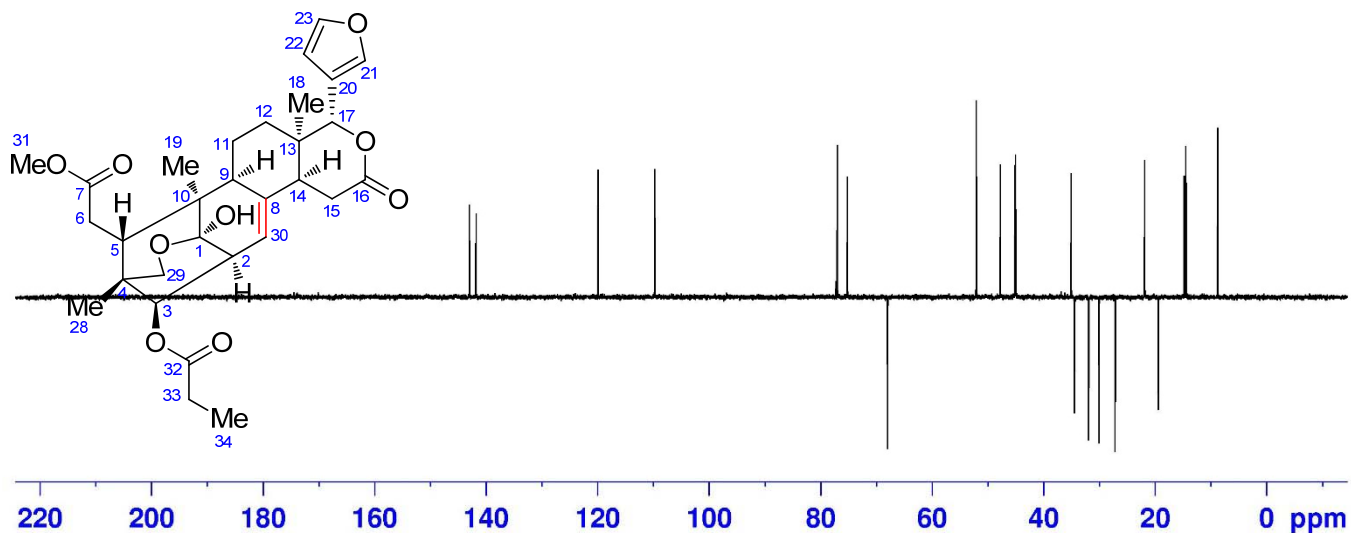

===== CHANNEL f1 =====  
 SFO1 100.6233324 MHz  
 NUC1 13C  
 P1 10.00 usec  
 SI 32768  
 SF 100.6127692 MHz  
 WDW EM  
 SSB 0  
 LB 1.00 Hz  
 GB 0  
 PC 1.40

# DEPT135 (100 MHz) spectrum of compound **2** in CDCl<sub>3</sub>

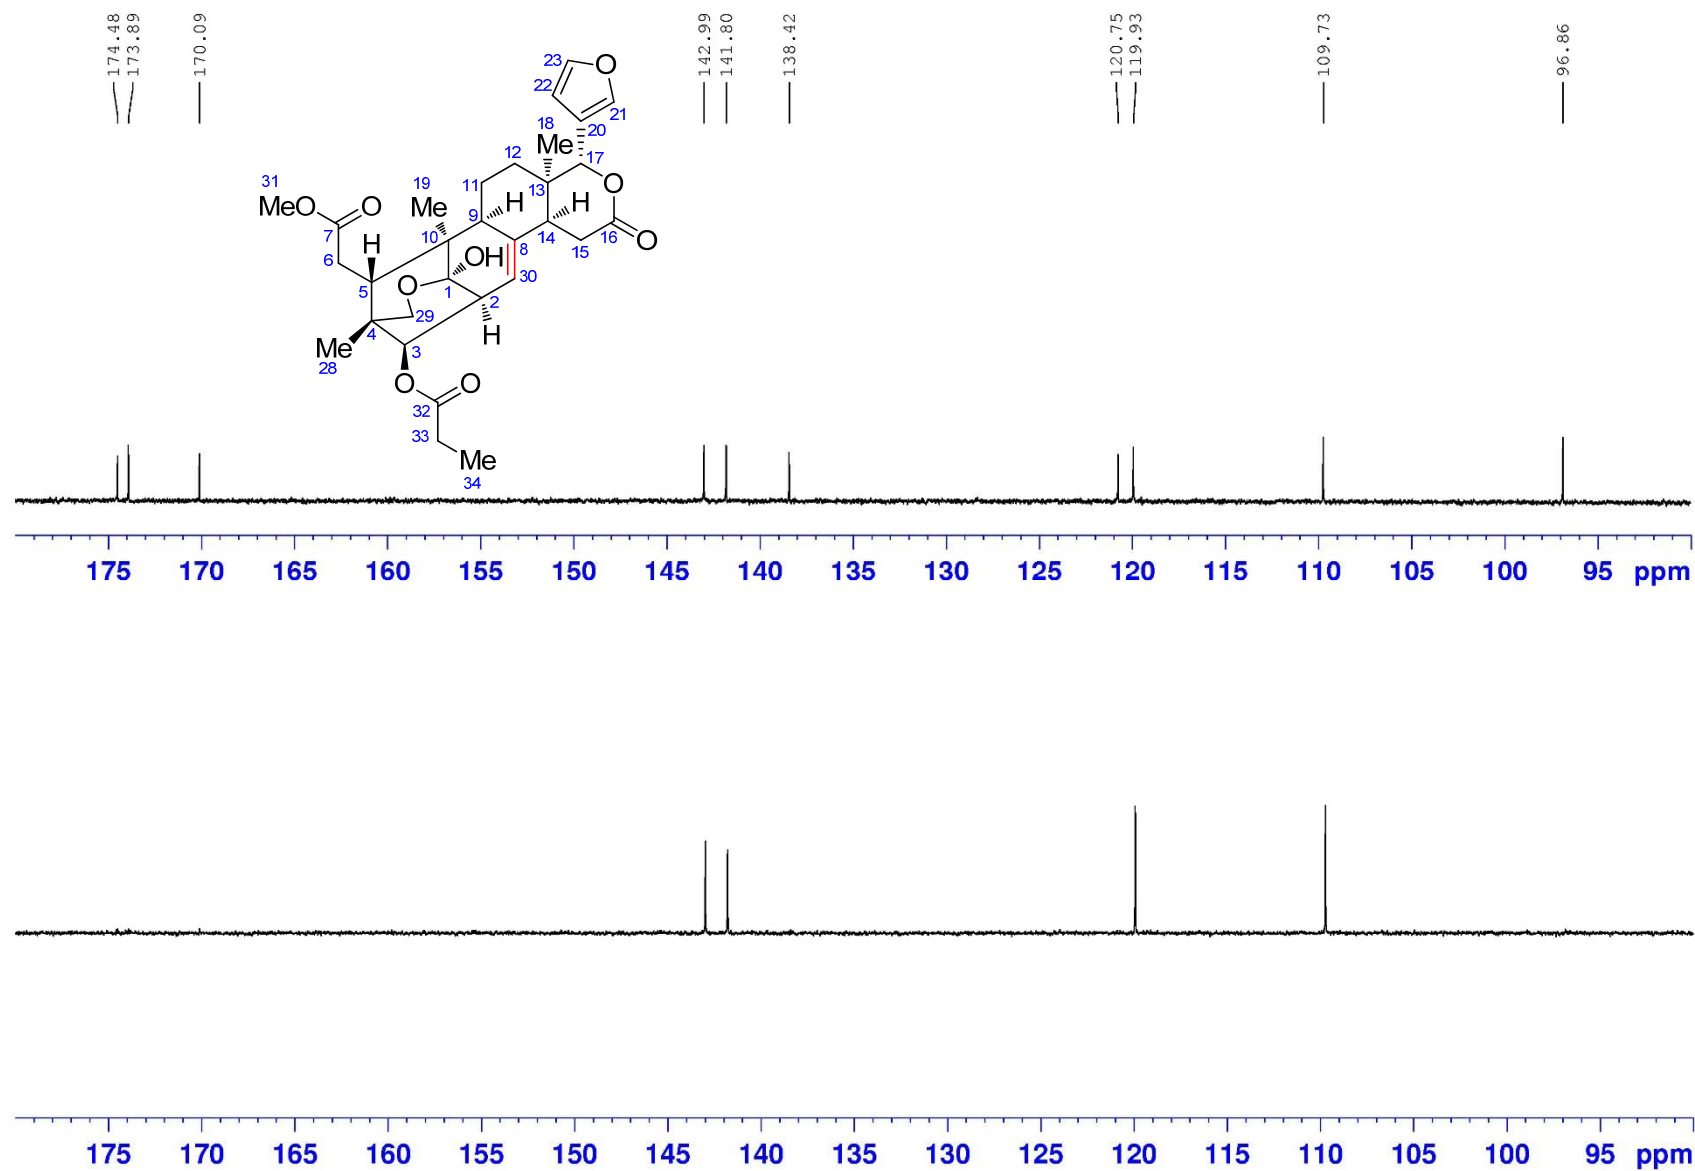

DEPT135 (100 MHz) spectrum of compound **2** in CDCl<sub>3</sub>

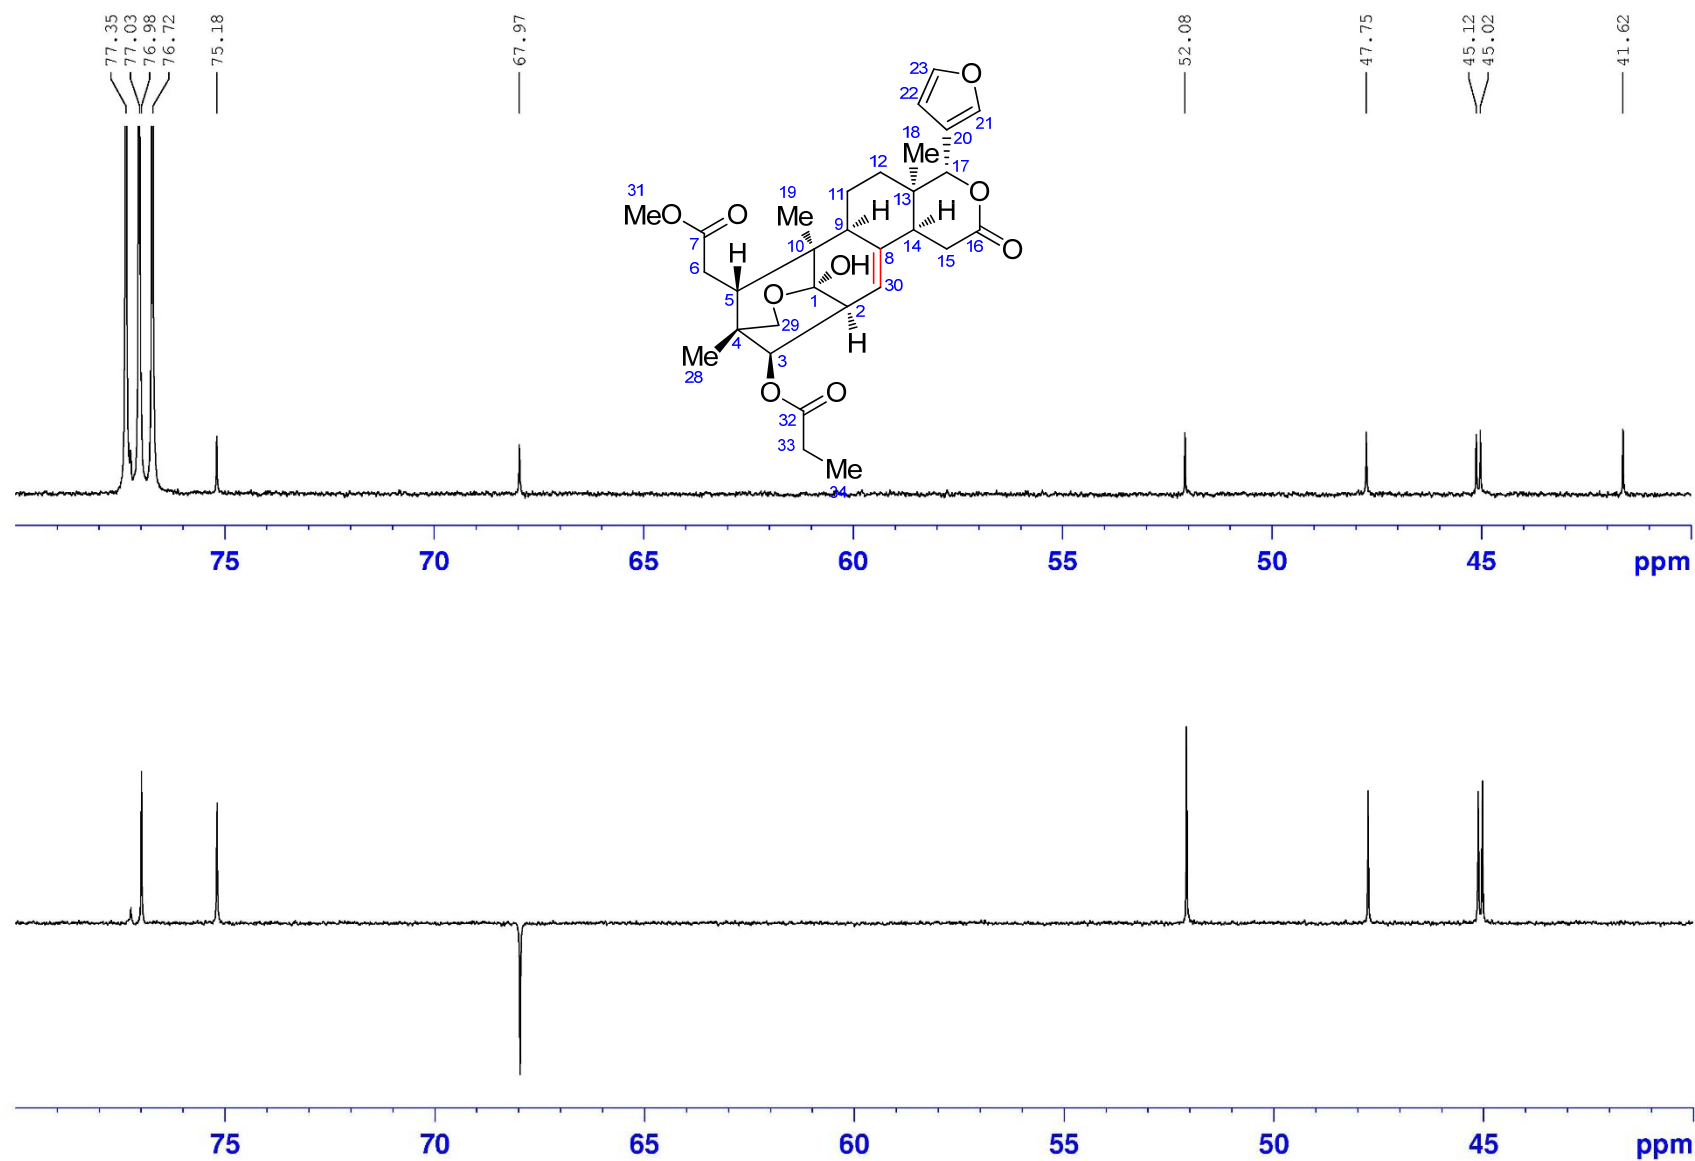

DEPT135 (100 MHz) spectrum of compound **2** in CDCl<sub>3</sub>

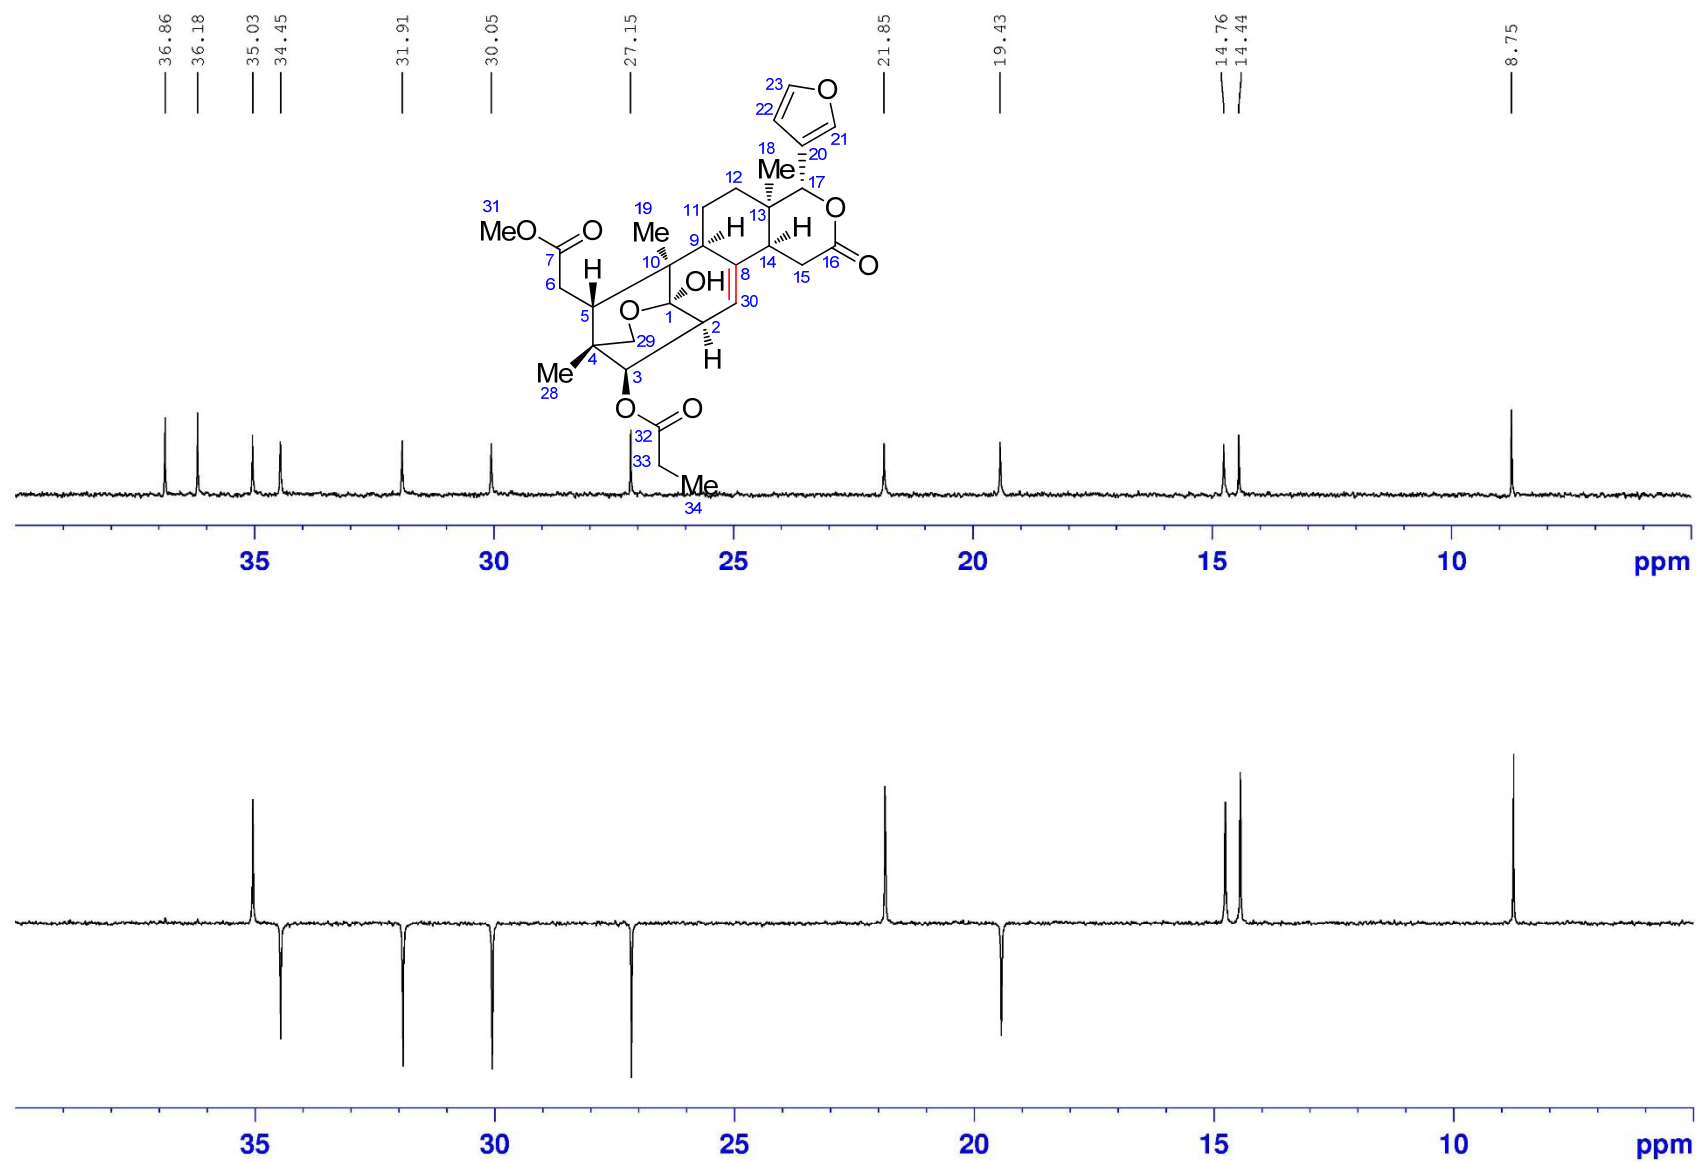



# $^1\text{H}$ - $^1\text{H}$ COSY (400 MHz) spectrum of compound **2** in $\text{CDCl}_3$

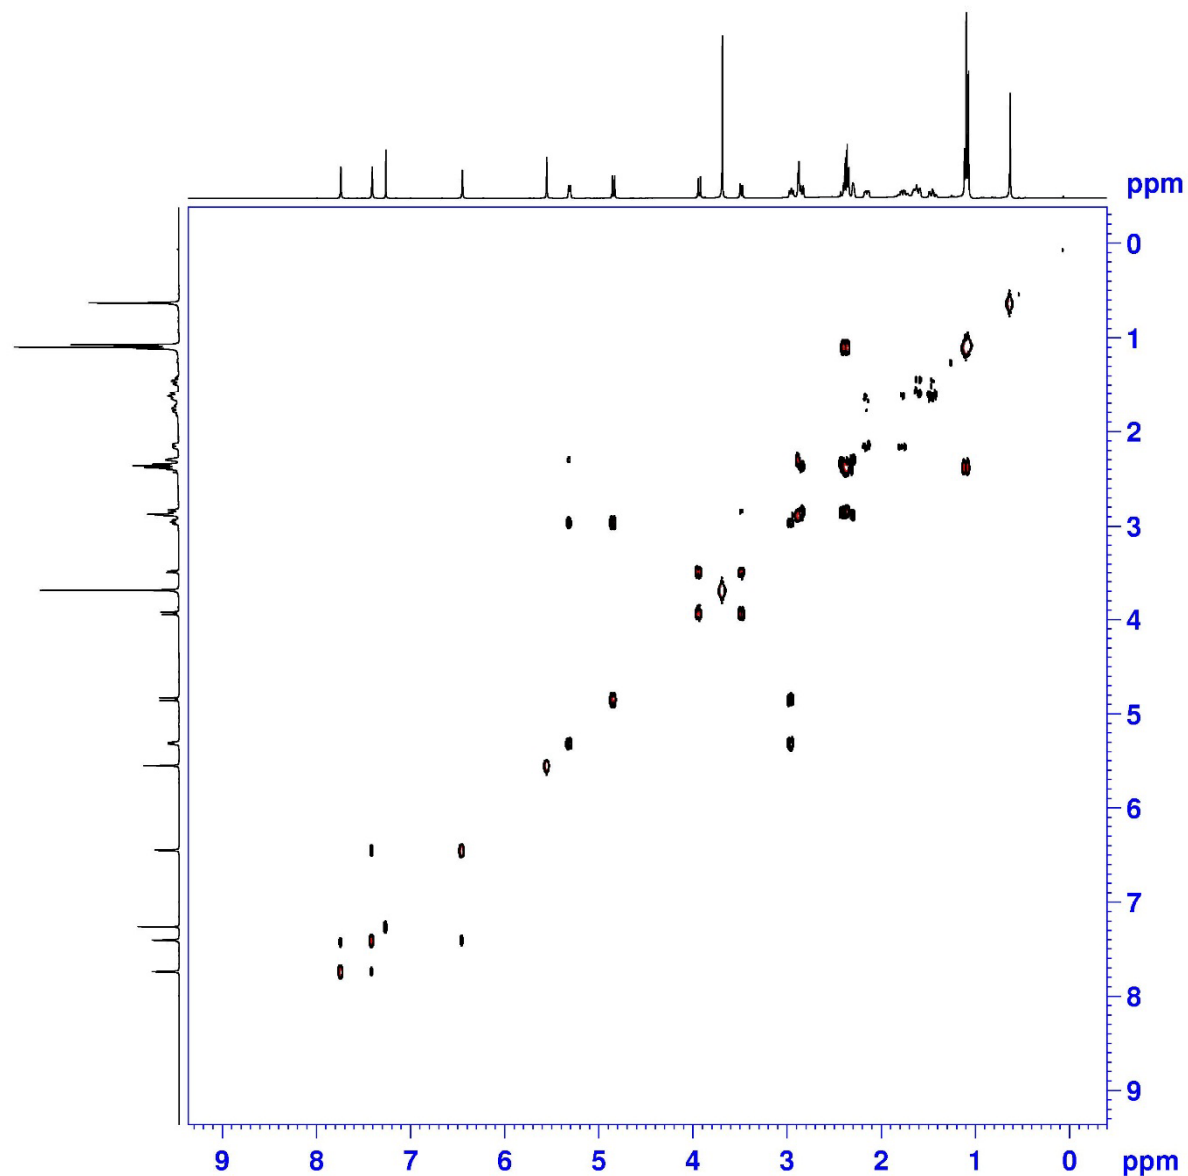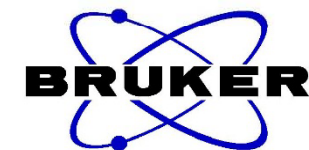

```
NAME      ZXP-R-17-4-2-2-2
EXPNO     4
PROCNO    1
Date_     20180821
Time      4.42
INSTRUM   spect
PROBHD    5 mm CPPBBO BB
PULPROG   cosygpppqf
TD        2048
SOLVENT   CDC13
NS        8
DS        8
SWH       3906.250 Hz
FIDRES    1.907349 Hz
AQ        0.2621940 sec
RG        147.94
DW        128.000 usec
DE        10.00 usec
TE        297.0 K
D0        0.00000300 sec
D1        1.89678097 sec
D11       0.03000000 sec
D12       0.00002000 sec
D13       0.00000400 sec
D16       0.00020000 sec
IN0       0.00025600 sec
```

```
===== CHANNEL f1 =====
SF01    400.1318006 MHz
NUC1     1H
P0       11.50 usec
P1       11.50 usec
P17      2500.00 usec
ND0      1
TD       128
SF01    400.1318 MHz
FIDRES   30.517578 Hz
SW       9.762 ppm
FMODE    QF
SI       1024
SF       400.1300076 MHz
WDW      QSINE
SSB      0
LB       0.00 Hz
GB       0
PC       1.40
SI       1024
MC2      QF
SF       400.1300060 MHz
WDW      QSINE
SSB      0
LB       0.00 Hz
GB       0
```

$^1\text{H}$ - $^1\text{H}$  COSY (400 MHz) spectrum of compound **2** in  $\text{CDCl}_3$

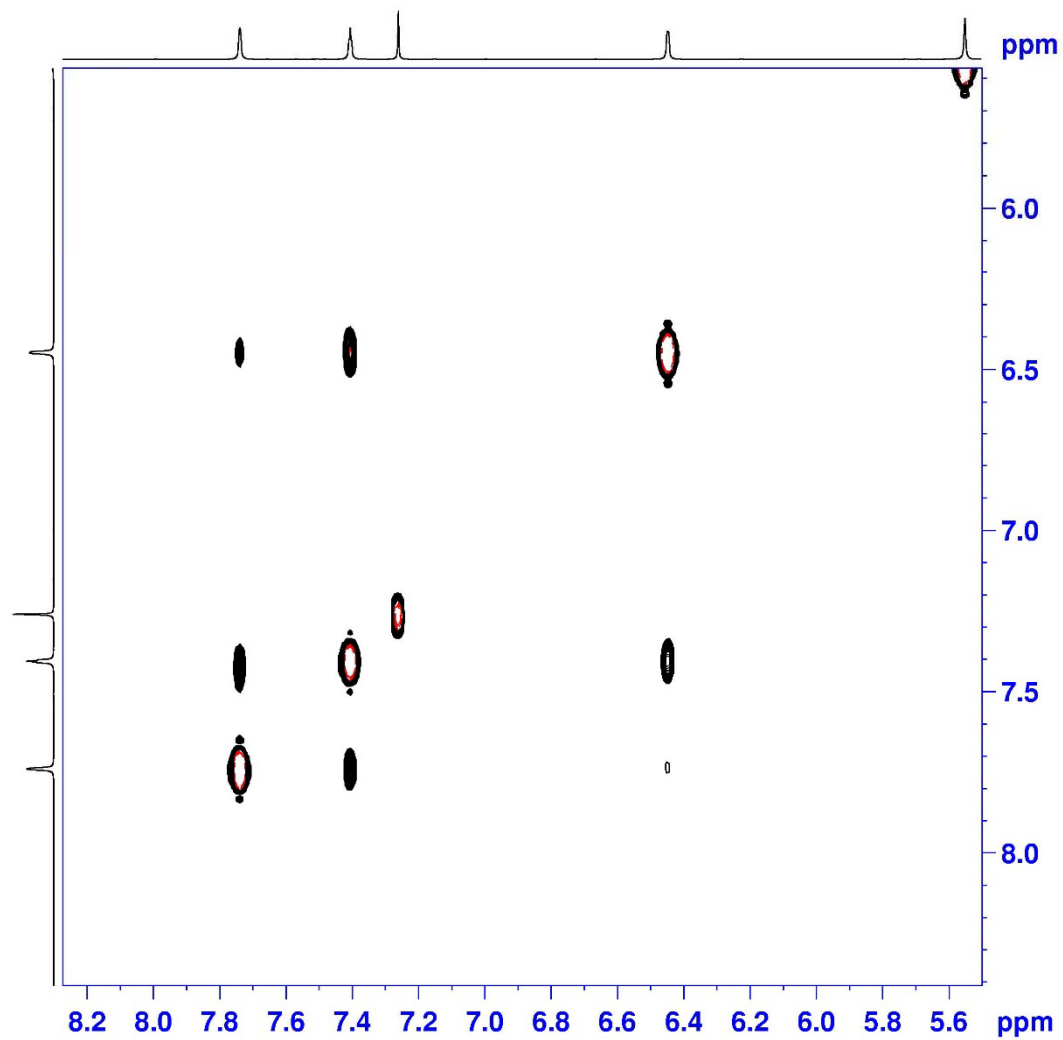

$^1\text{H}$ - $^1\text{H}$  COSY (400 MHz) spectrum of compound **2** in  $\text{CDCl}_3$

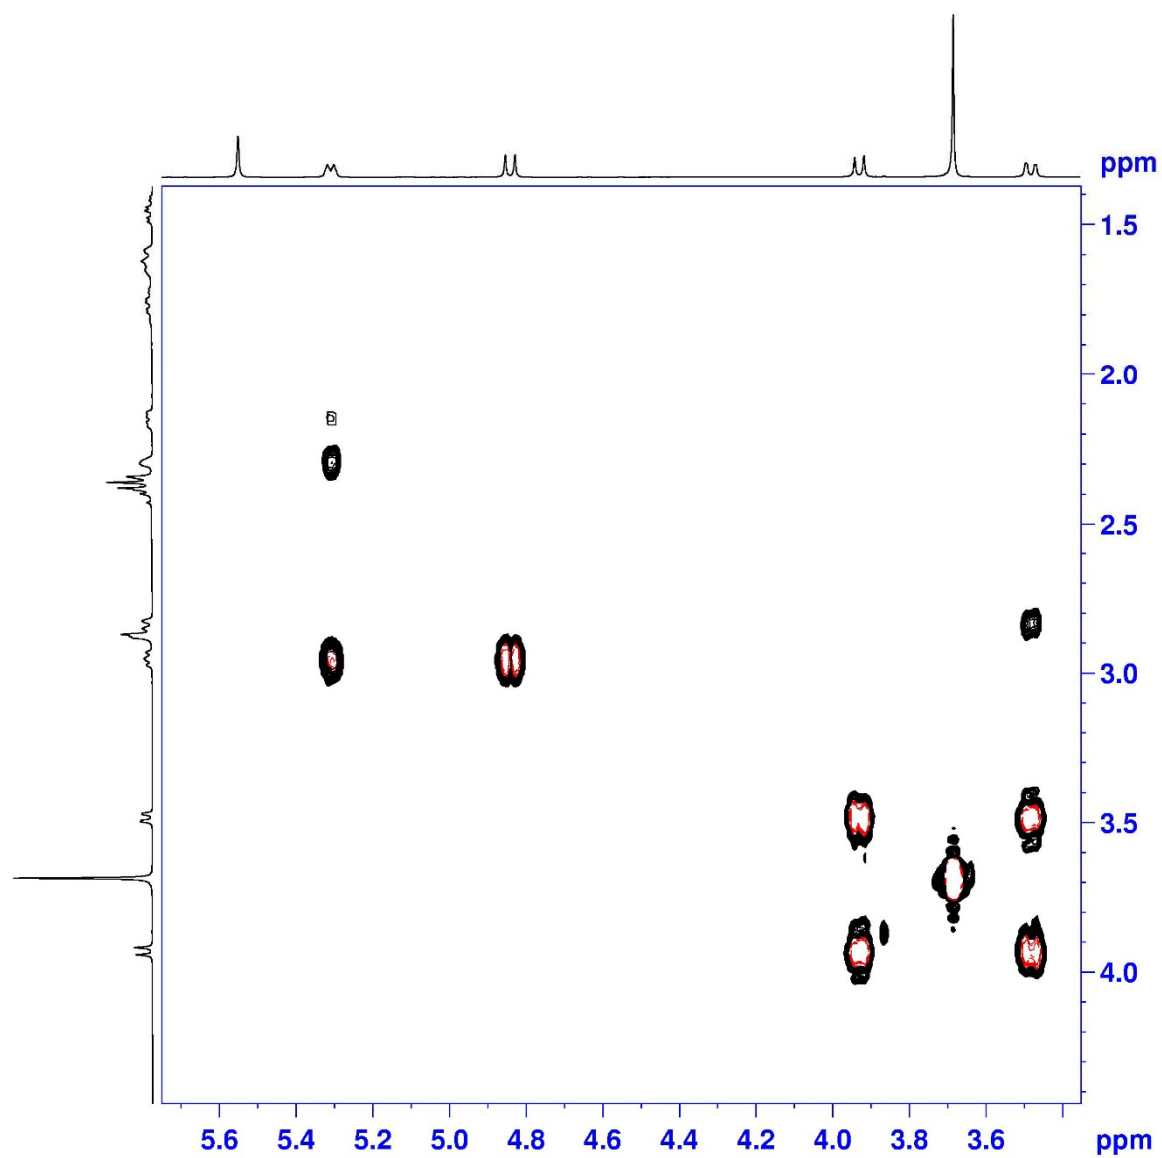

$^1\text{H}$ - $^1\text{H}$  COSY (400 MHz) spectrum of compound **2** in  $\text{CDCl}_3$

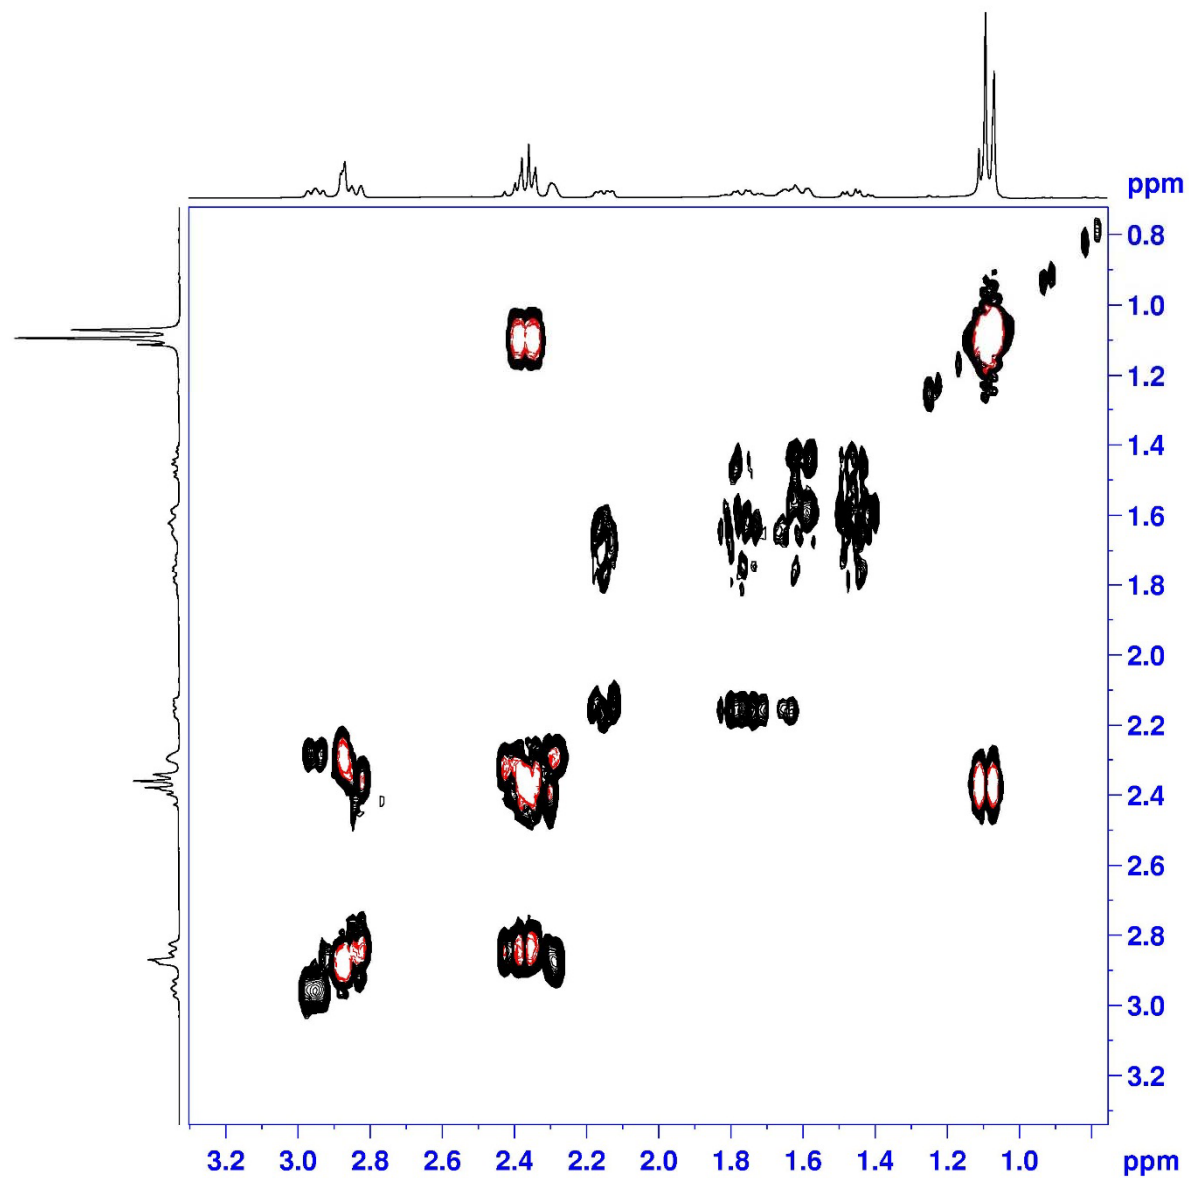

# HSQC (400 MHz) spectrum of compound **2** in CDCl<sub>3</sub>

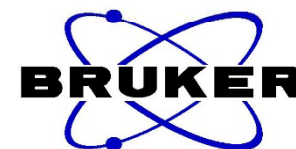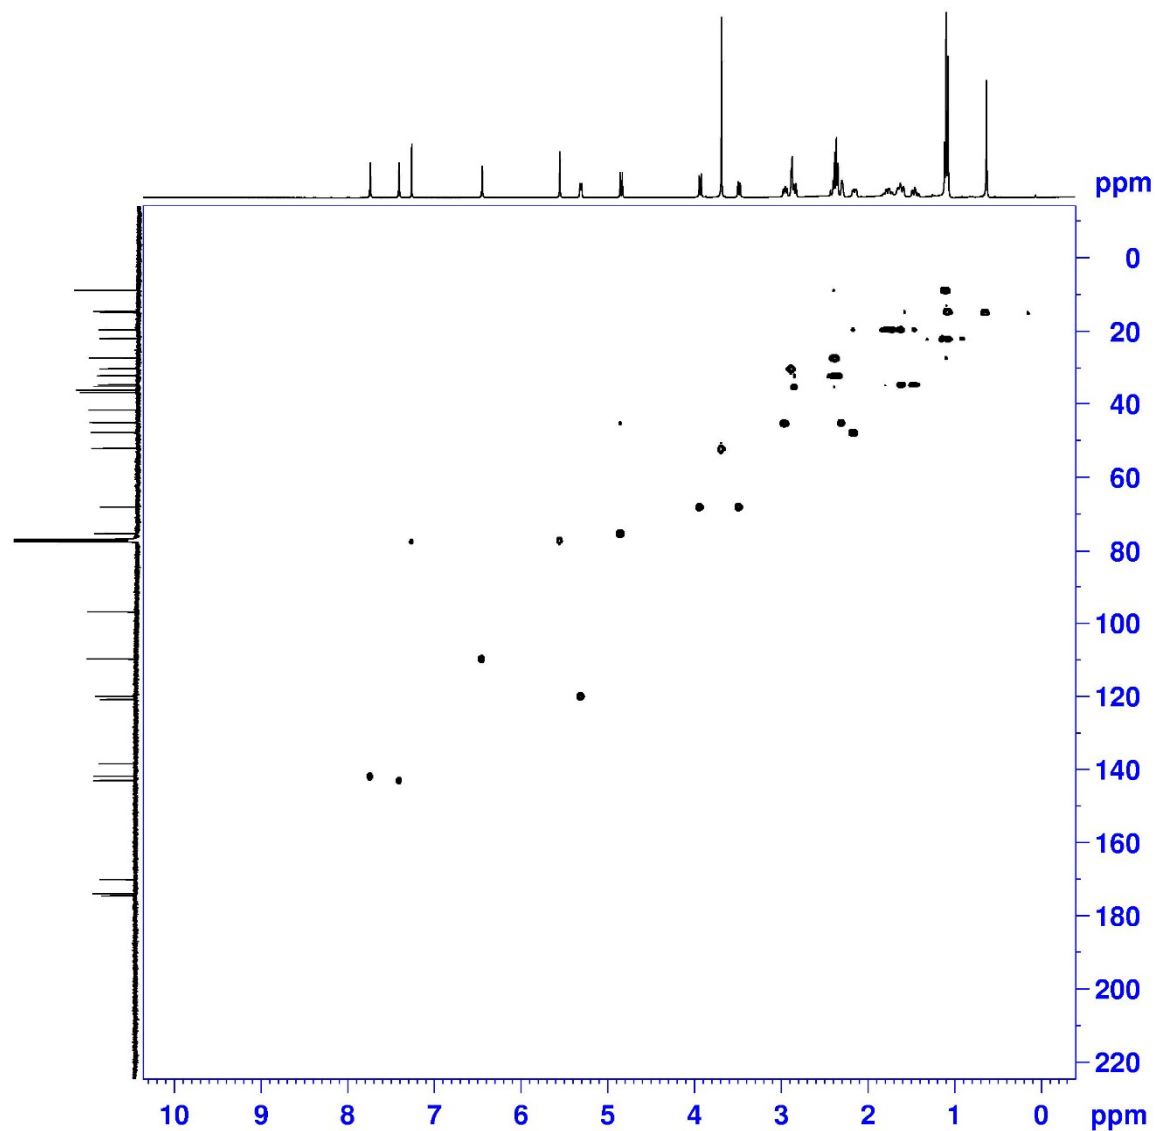

```

NAME      ZXP-R-17-4-2-2-2
EXPNO     5
PROCNO    1
Date_     20180821
Time      5.21
INSTRUM   spect
PROBHD    5 mm CPPBBO BB
PULPROG   hsqcetgps12
TD        1024
SOLVENT   CDCl3
NS        16
DS        16
SWH       4302.926 Hz
FIDRES    4.202076 Hz
AQ        0.1190388 sec
RG        208.5
DW        116.200 usec
DE        10.00 usec
TE        297.0 K
CNST2     145.0000000
D0        0.00000300 sec
D1        1.46497905 sec
D4        0.00172414 sec
D11       0.03000000 sec
D16       0.00020000 sec
D24       0.00086207 sec
IN0       0.00002080 sec
ZGPTINS

===== CHANNEL f1 =====
SFO1      400.1320007 MHz
NUC1      1H
P1        11.50 usec
P2        23.00 usec
P28       0.00 usec
ND0       2
TD        256
SFO1      100.6233 MHz
FIDRES    93.900238 Hz
SW        238.896 ppm
FnMODE    Echo-Antiecho
SI        1024
SF        400.1300074 MHz
WDW       QSINE
SSB       2
LB        0.00 Hz
GB        0
PC        1.40
SI        1024
MC2       echo-antiecho
SF        100.6127538 MHz
WDW       QSINE
SSB       2
LB        0.00 Hz
GB        0
    
```

HSQC (400 MHz) spectrum of compound **2** in CDCl<sub>3</sub>

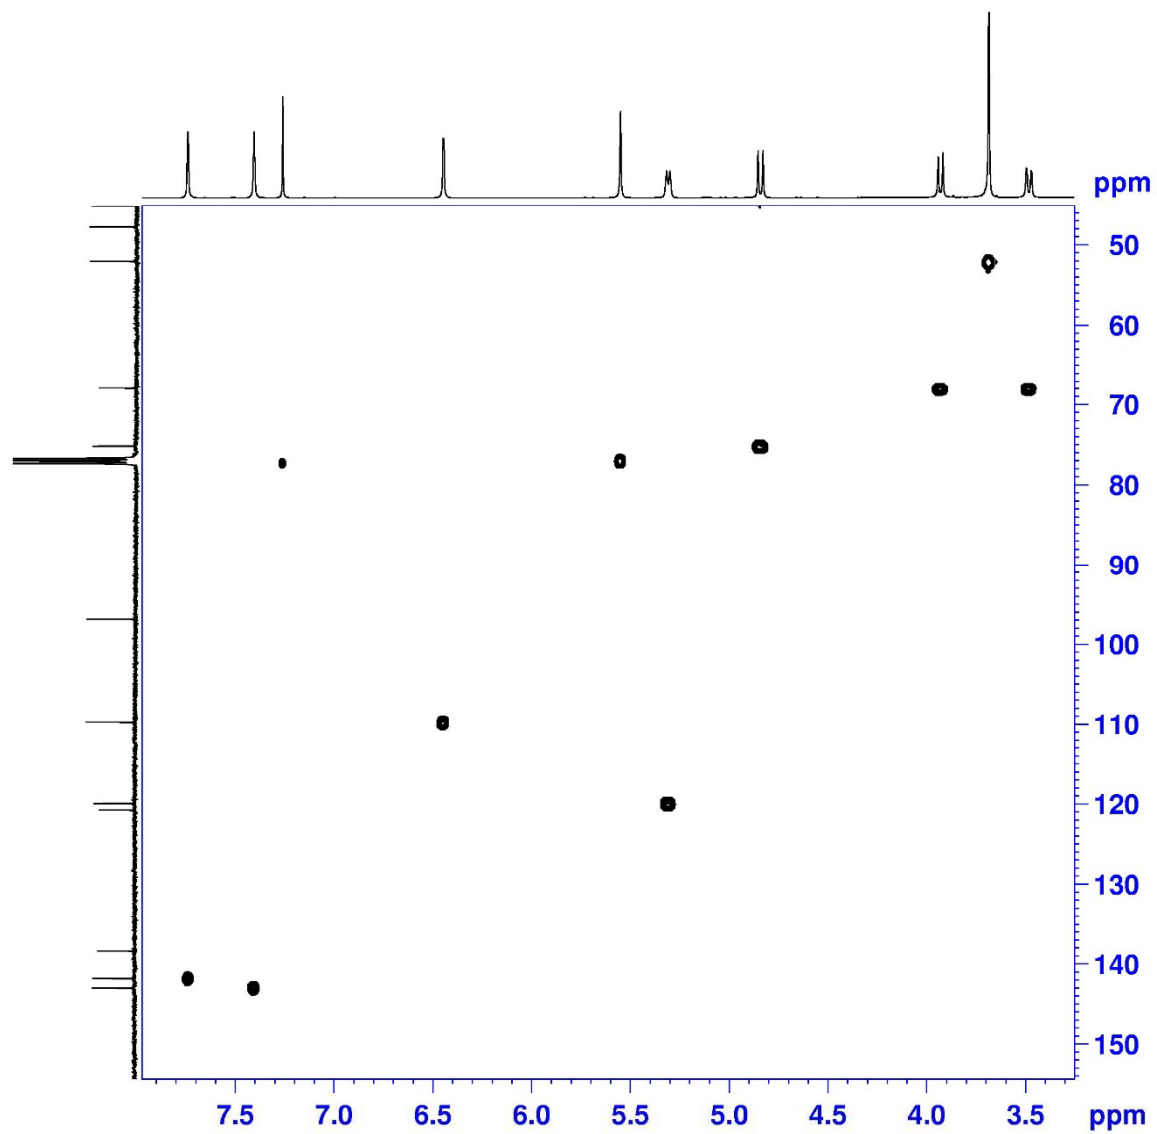

HSQC (400 MHz) spectrum of compound **2** in CDCl<sub>3</sub>

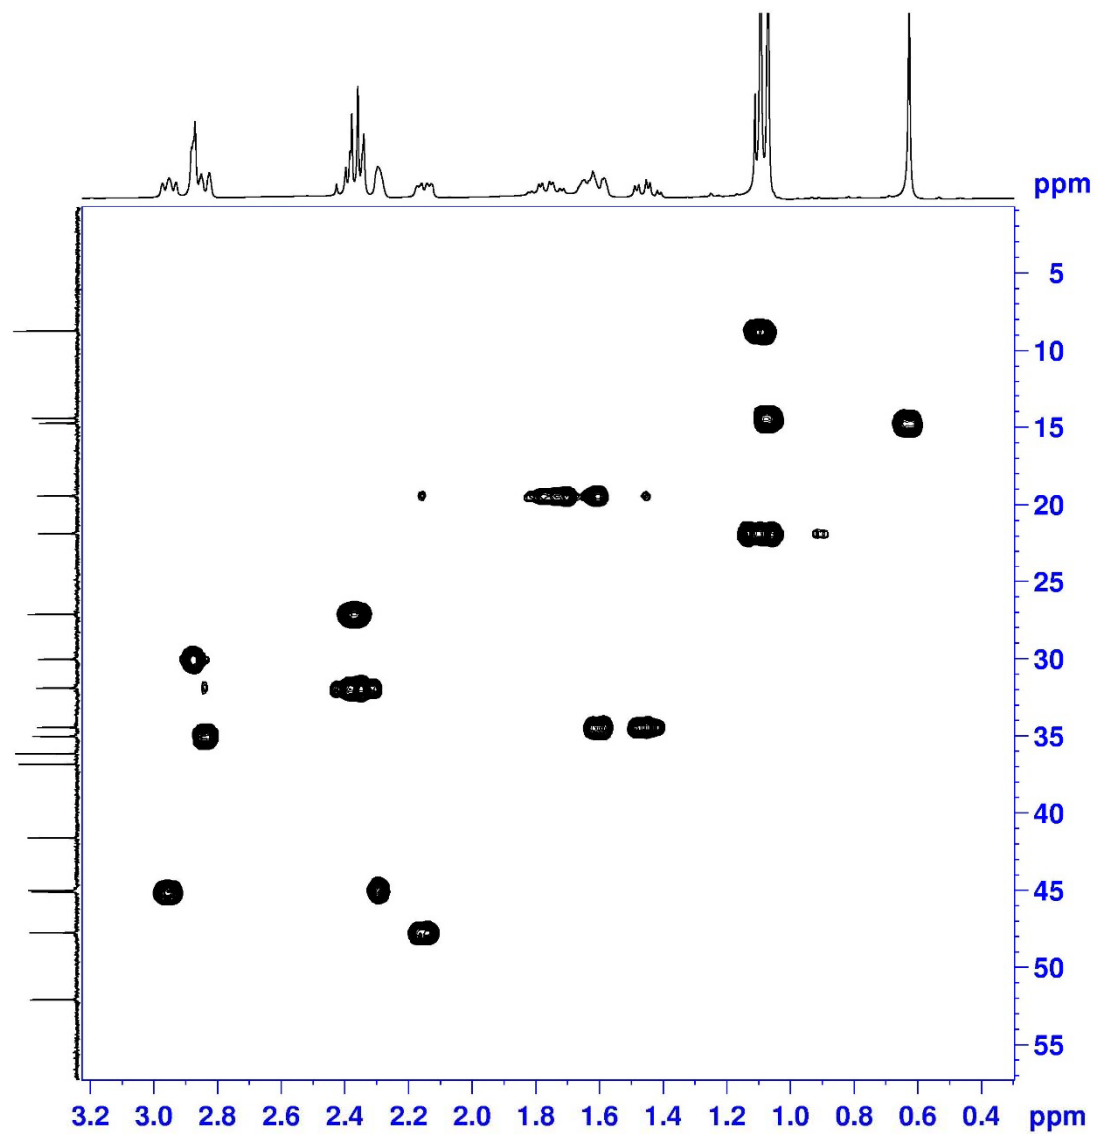

# HMBC (400 MHz) spectrum of compound **2** in CDCl<sub>3</sub>

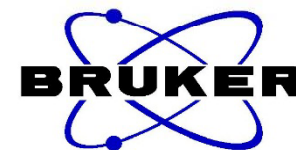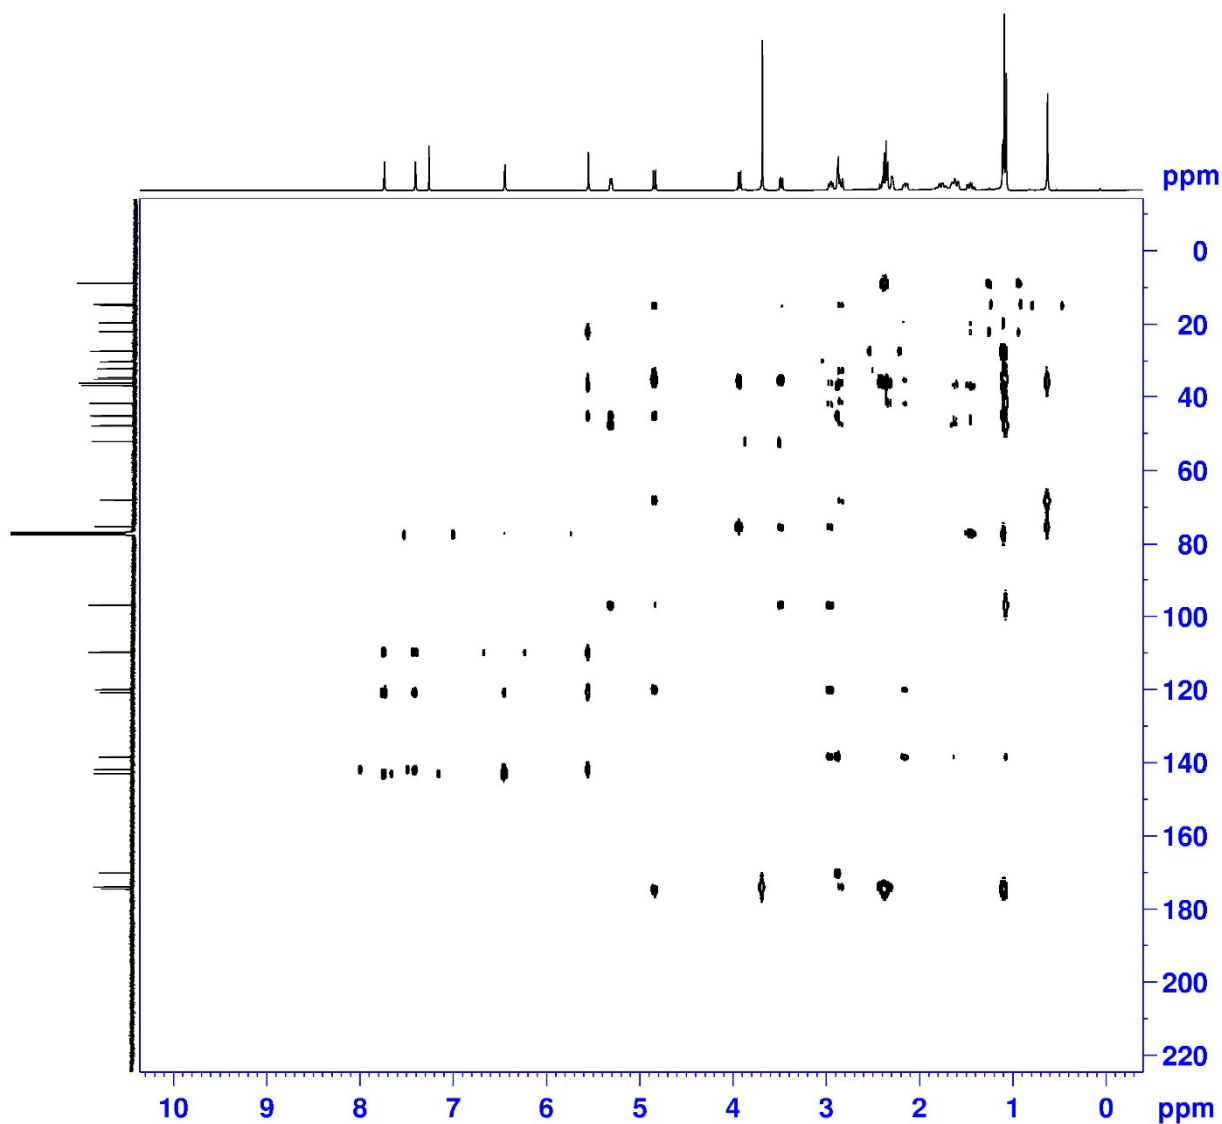

```

NAME      ZXP-R-17-4-2-2-2
EXPNO     6
PROCNO    1
Date_     20180821
Time      7.13
INSTRUM   spect
PROBHD    5 mm CPPBBO BB
PULPROG   hmbcgp1pndqf
TD         4096
SOLVENT   CDCl3
NS         32
DS         16
SWH        5197.505 Hz
FIDRES     1.268922 Hz
AQ         0.3940852 sec
RG         208.5
DW         96.200 usec
DE         10.00 usec
TE         297.0 K
CNST2     145.0000000
CNST13    10.0000000
D0         0.00000300 sec
D1         1.50000000 sec
D2         0.00344828 sec
D6         0.05000000 sec
D16        0.00020000 sec
IN0        0.00002080 sec
    
```

```

===== CHANNEL f1 =====
SF01      400.1323208 MHz
NUC1       1H
P1         11.50 usec
P2         23.00 usec
ND0        2
TD         119
SF01      100.6233 MHz
FIDRES     202.003876 Hz
SW         238.896 ppm
FnMODE     QF
SI         2048
SF         400.1300072 MHz
WDW        SINE
SSB        0
LB         0.00 Hz
GB         0
PC         1.40
SI         1024
MC2        QF
SF         100.6127637 MHz
WDW        SINE
SSB        0
LB         0.00 Hz
GB         0
    
```



HMBC (400 MHz) spectrum of compound **2** in  $\text{CDCl}_3$

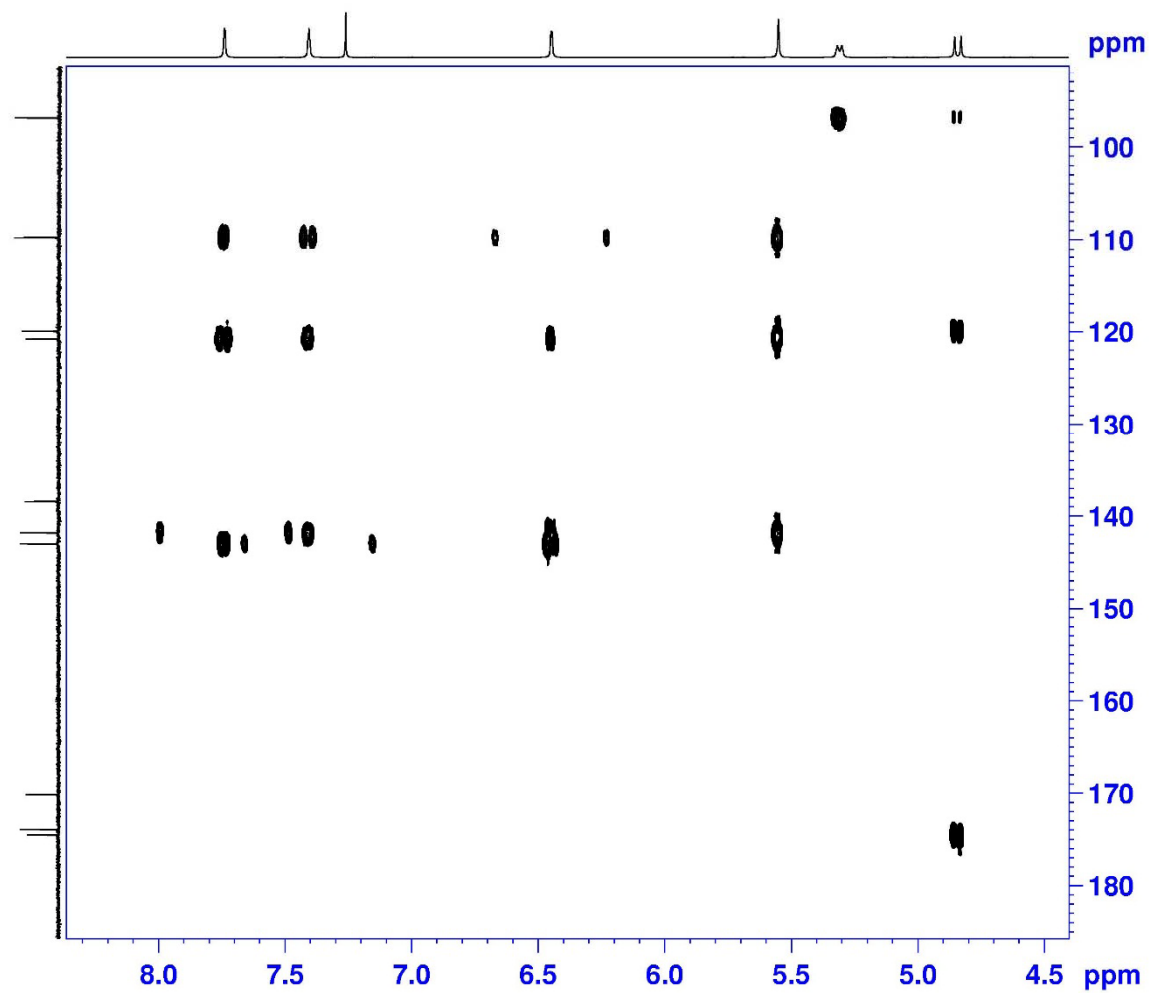

HMBC (400 MHz) spectrum of compound **2** in CDCl<sub>3</sub>

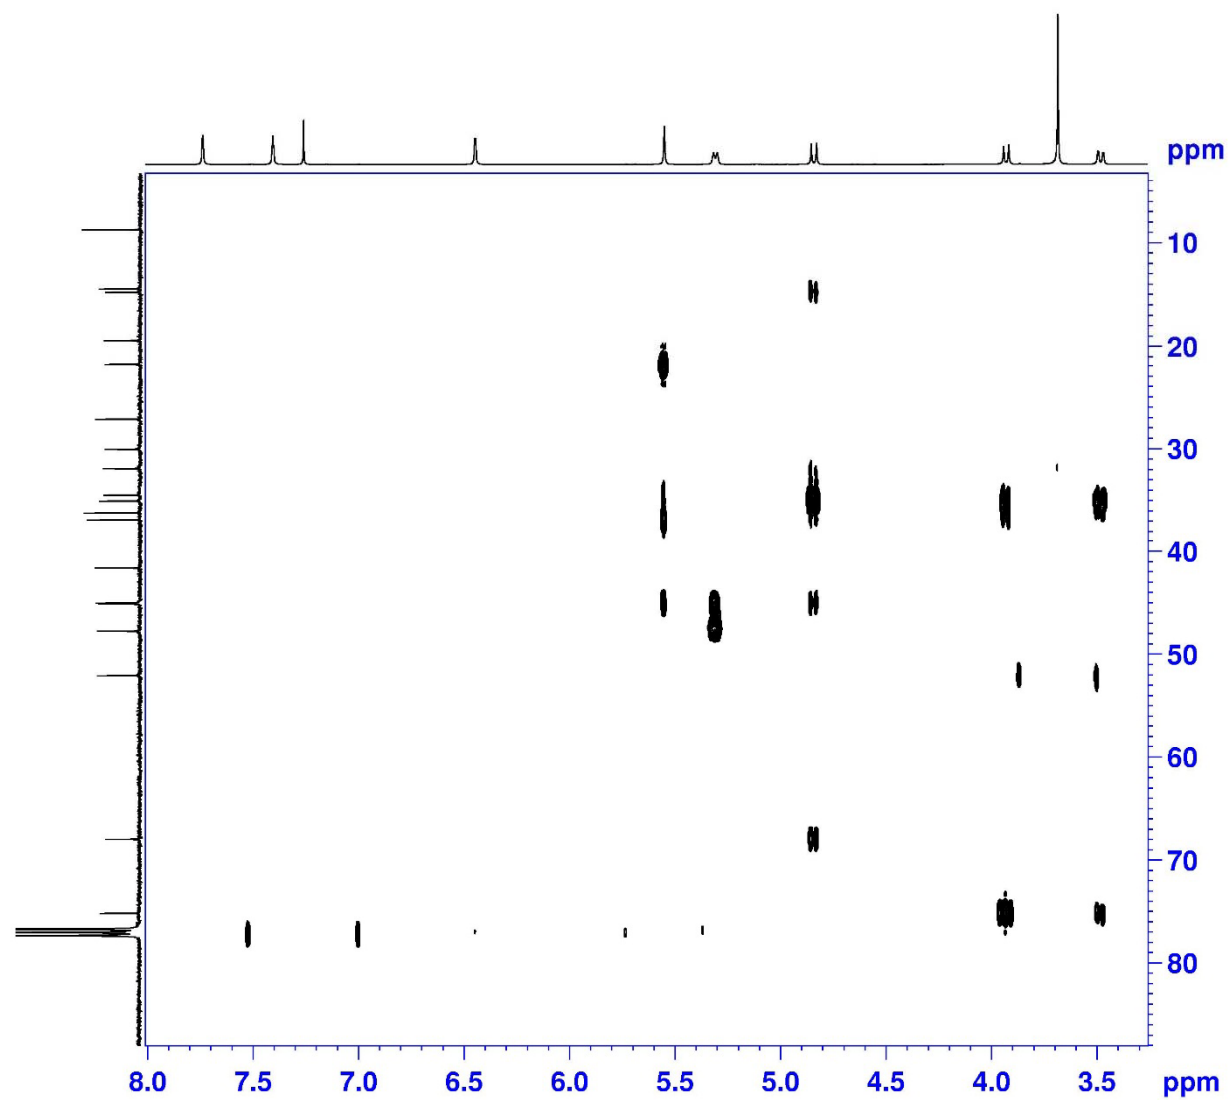

HMBC (400 MHz) spectrum of compound **2** in CDCl<sub>3</sub>

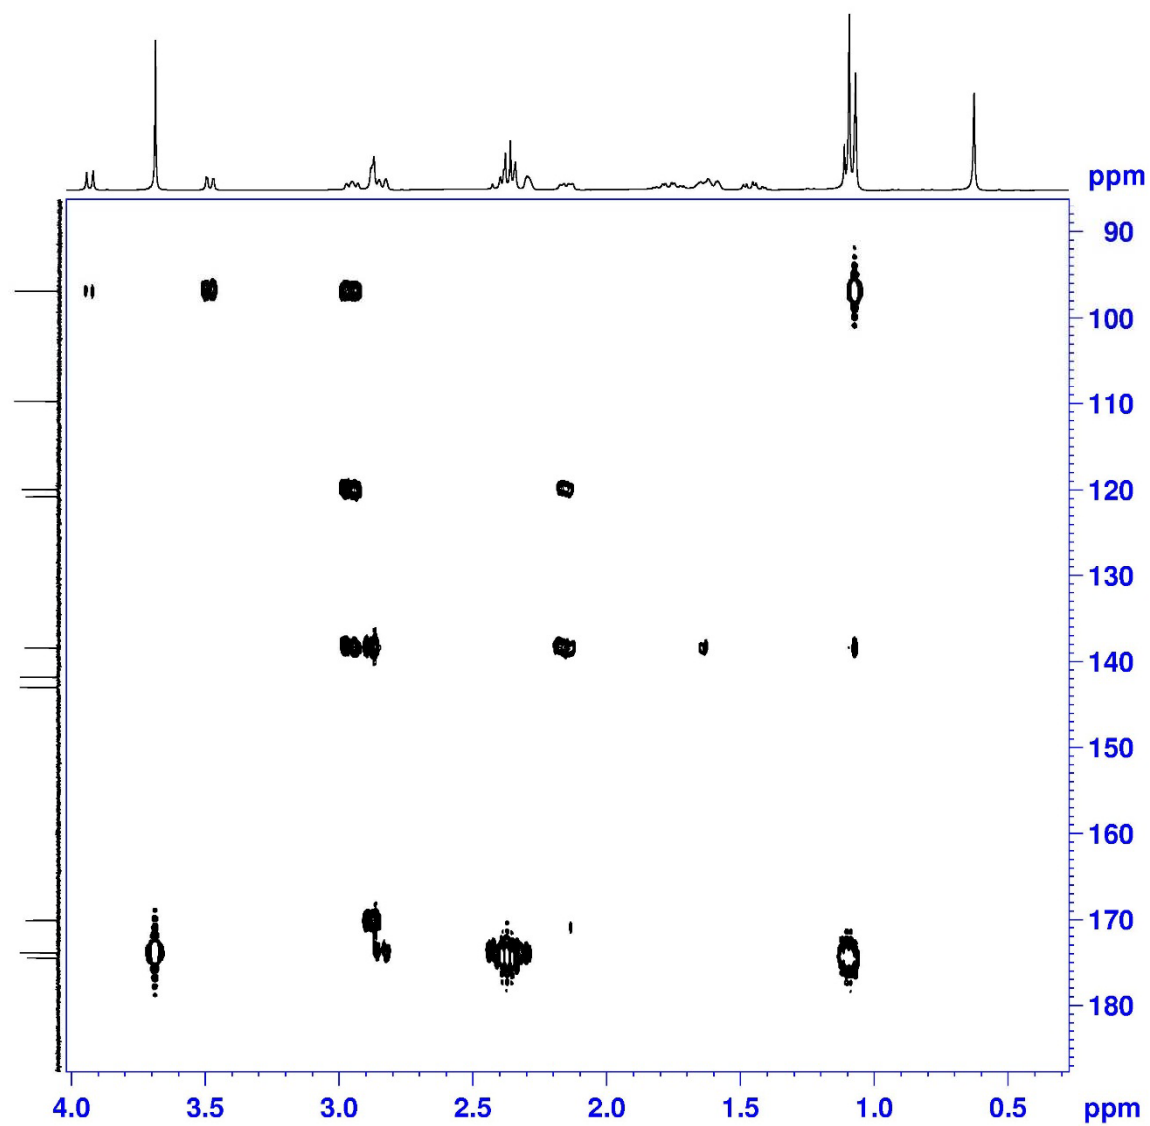

HMBC (400 MHz) spectrum of compound **2** in CDCl<sub>3</sub>

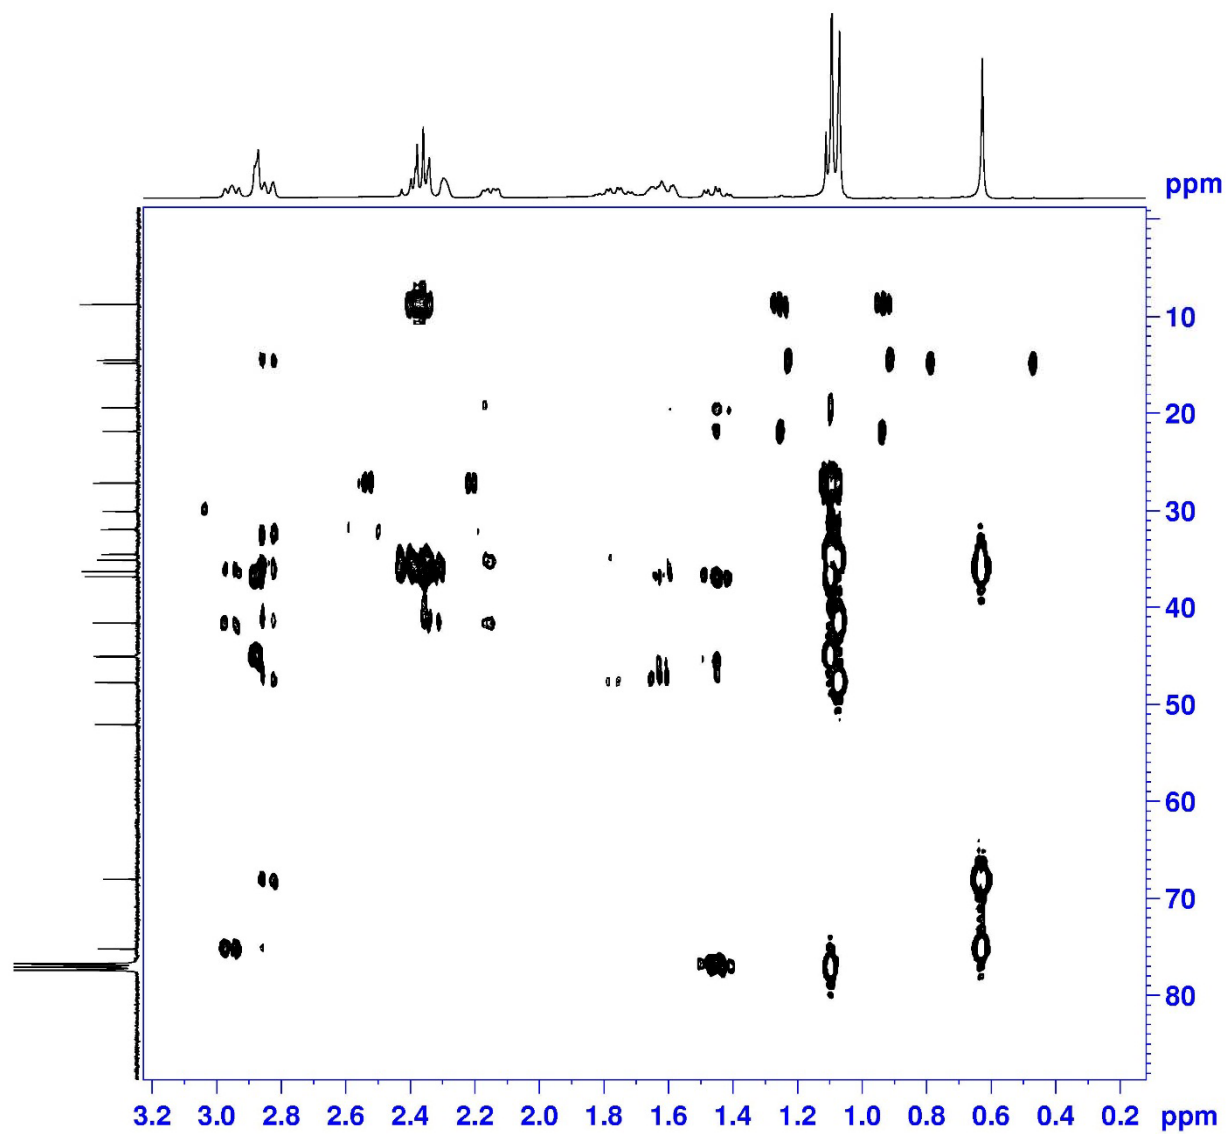

HMBC (400 MHz) spectrum of compound **2** in CDCl<sub>3</sub>

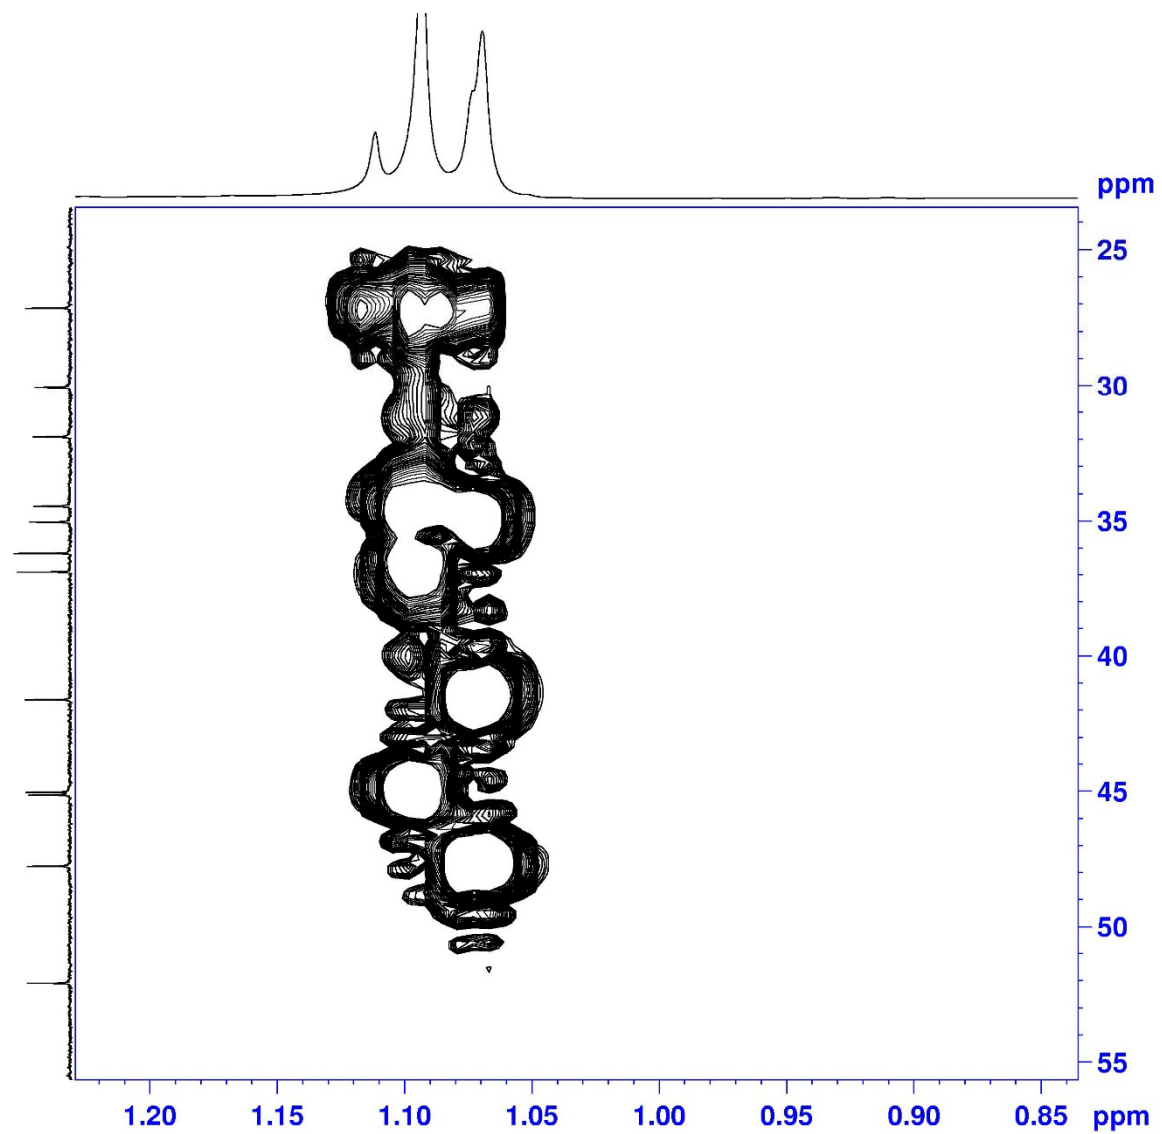

# NOESY (400 MHz) spectrum of compound **2** in CDCl<sub>3</sub>

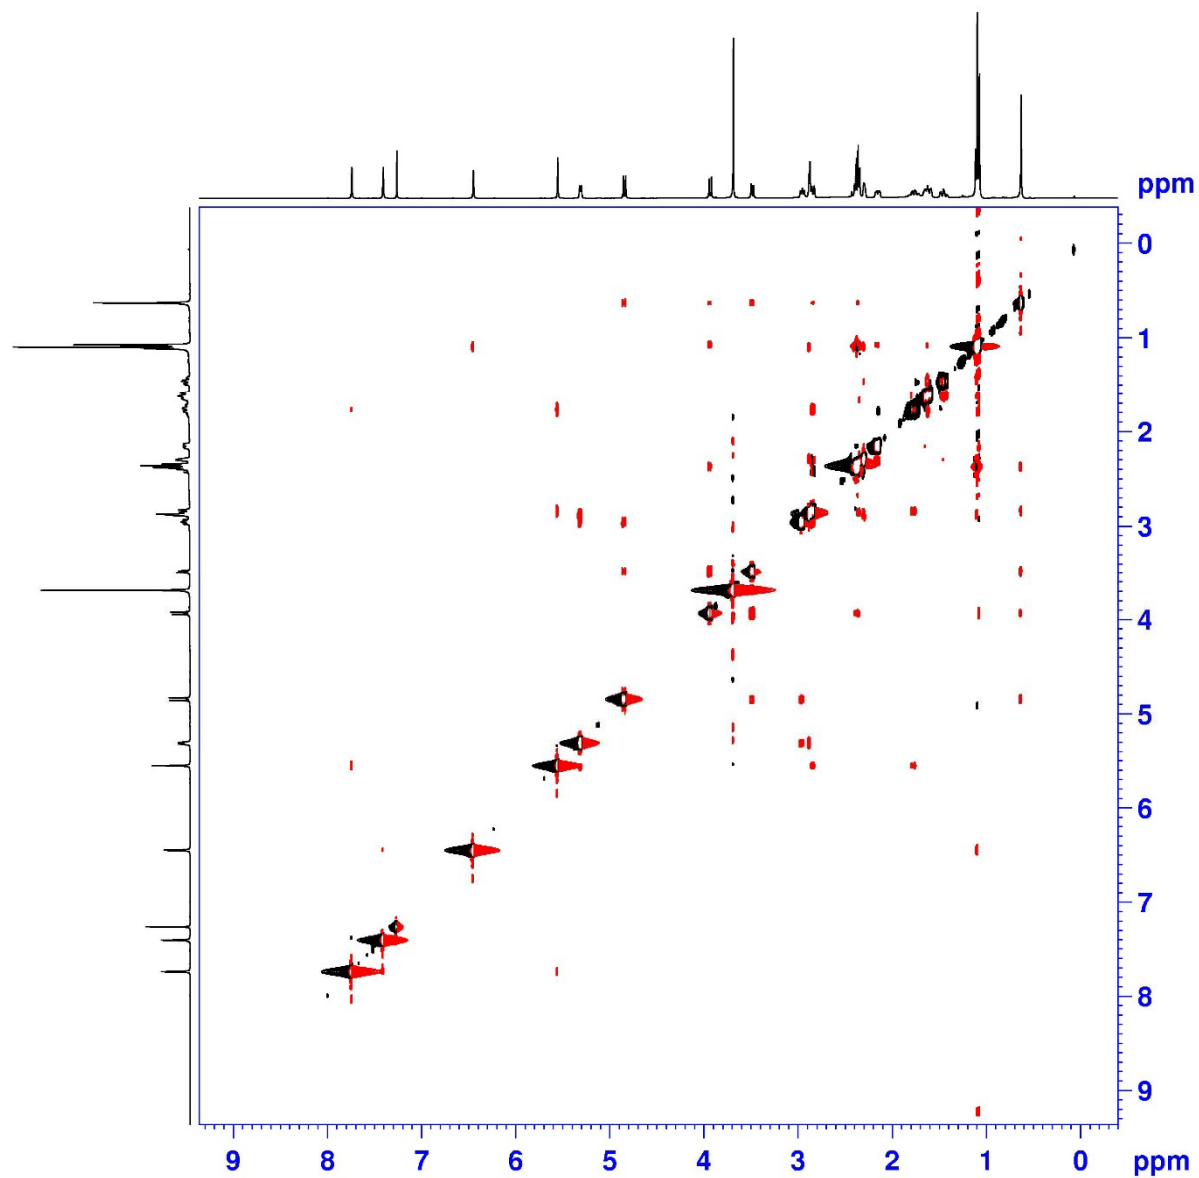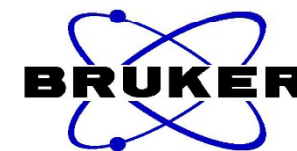

```

NAME      ZXP-R-17-4-2-2-2
EXPNO     7
PROCNO    1
Date_     20180823
Time      4.30
INSTRUM   spect
PROBHD    5 mm CFPBBO BB
PULPROG   noesygpphph
TD        2048
SOLVENT   CDCl3
NS        16
DS        32
SWH       4000.000 Hz
FIDRES    1.953125 Hz
AQ        0.2560500 sec
RG        117.37
DW        125.000 usec
DE        10.00 usec
TE        297.0 K
D0        0.00011036 sec
D1        1.99385595 sec
D8        0.30000001 sec
D11       0.03000000 sec
D12       0.00002000 sec
D16       0.00020000 sec
IN0       0.00025000 sec
    
```

```

===== CHANNEL f1 =====
SFO1    400.1318006 MHz
NUC1     1H
P1       11.50 usec
P2       23.00 usec
P17      2500.00 usec
ND0       1
TD       256
SFO1    400.1318 MHz
FIDRES   15.625000 Hz
SW       9.997 ppm
FnMODE   States-TPPI
SI       1024
SF       400.1300072 MHz
WDW      QSINE
SSB      2
LB       0.00 Hz
GB       0
PC       1.00
SI       1024
MC2      States-TPPI
SF       400.1300076 MHz
WDW      QSINE
SSB      2
LB       0.00 Hz
GB       0
    
```

NOESY (400 MHz) spectrum of compound **2** in CDCl<sub>3</sub>

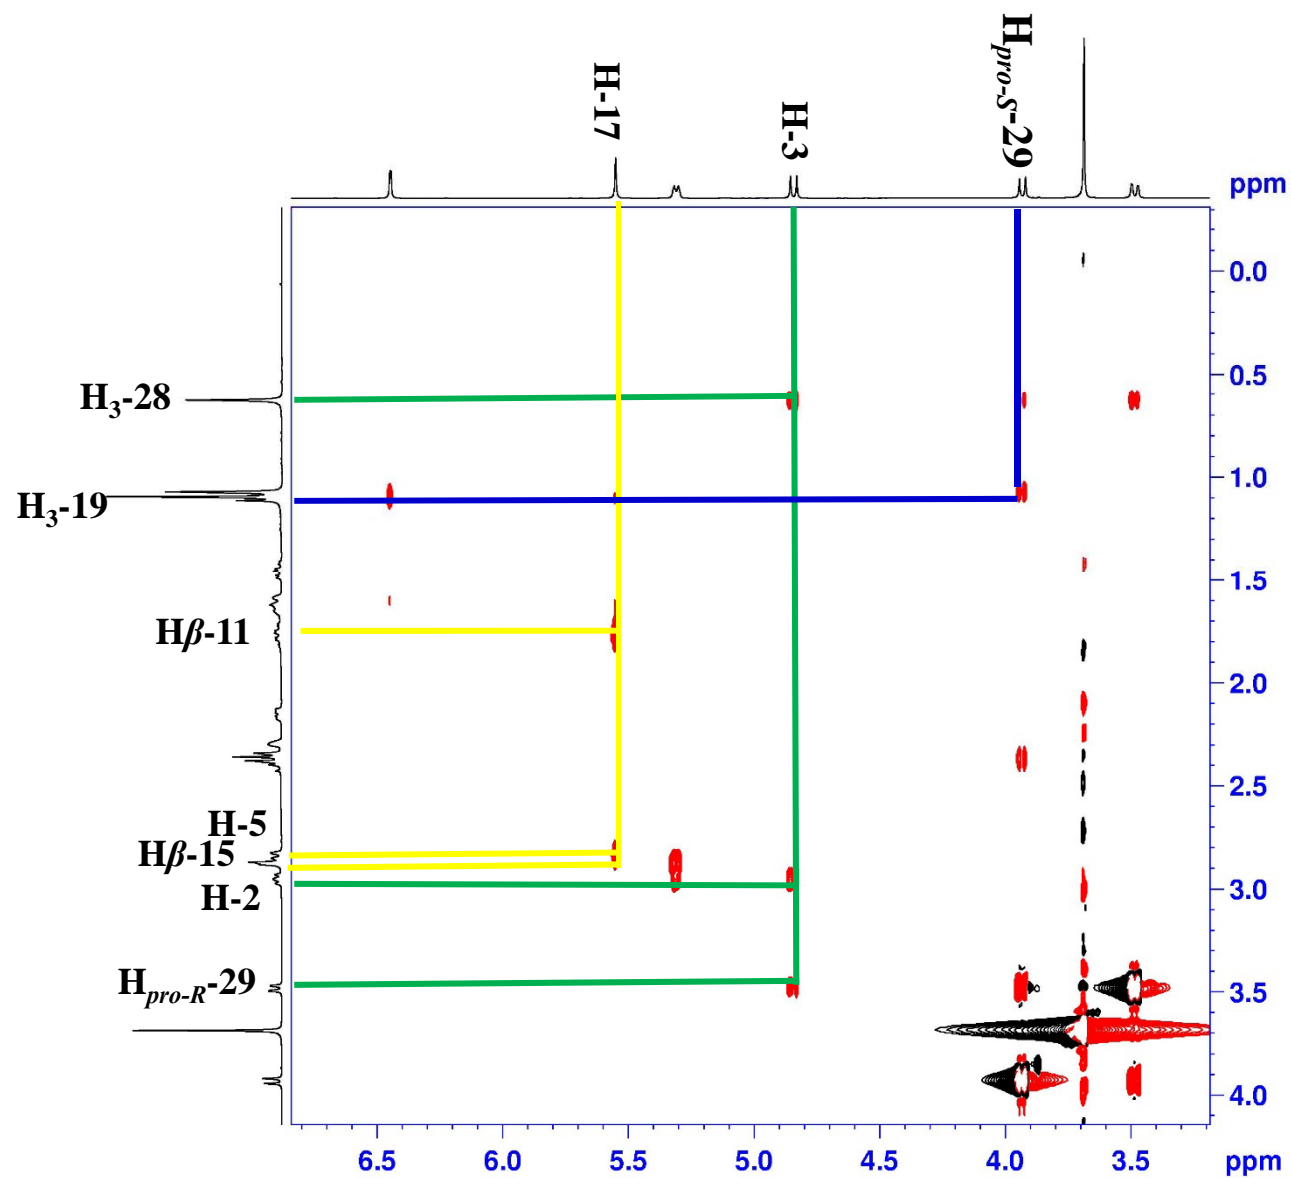

NOESY (400 MHz) spectrum of compound **2** in  $\text{CDCl}_3$

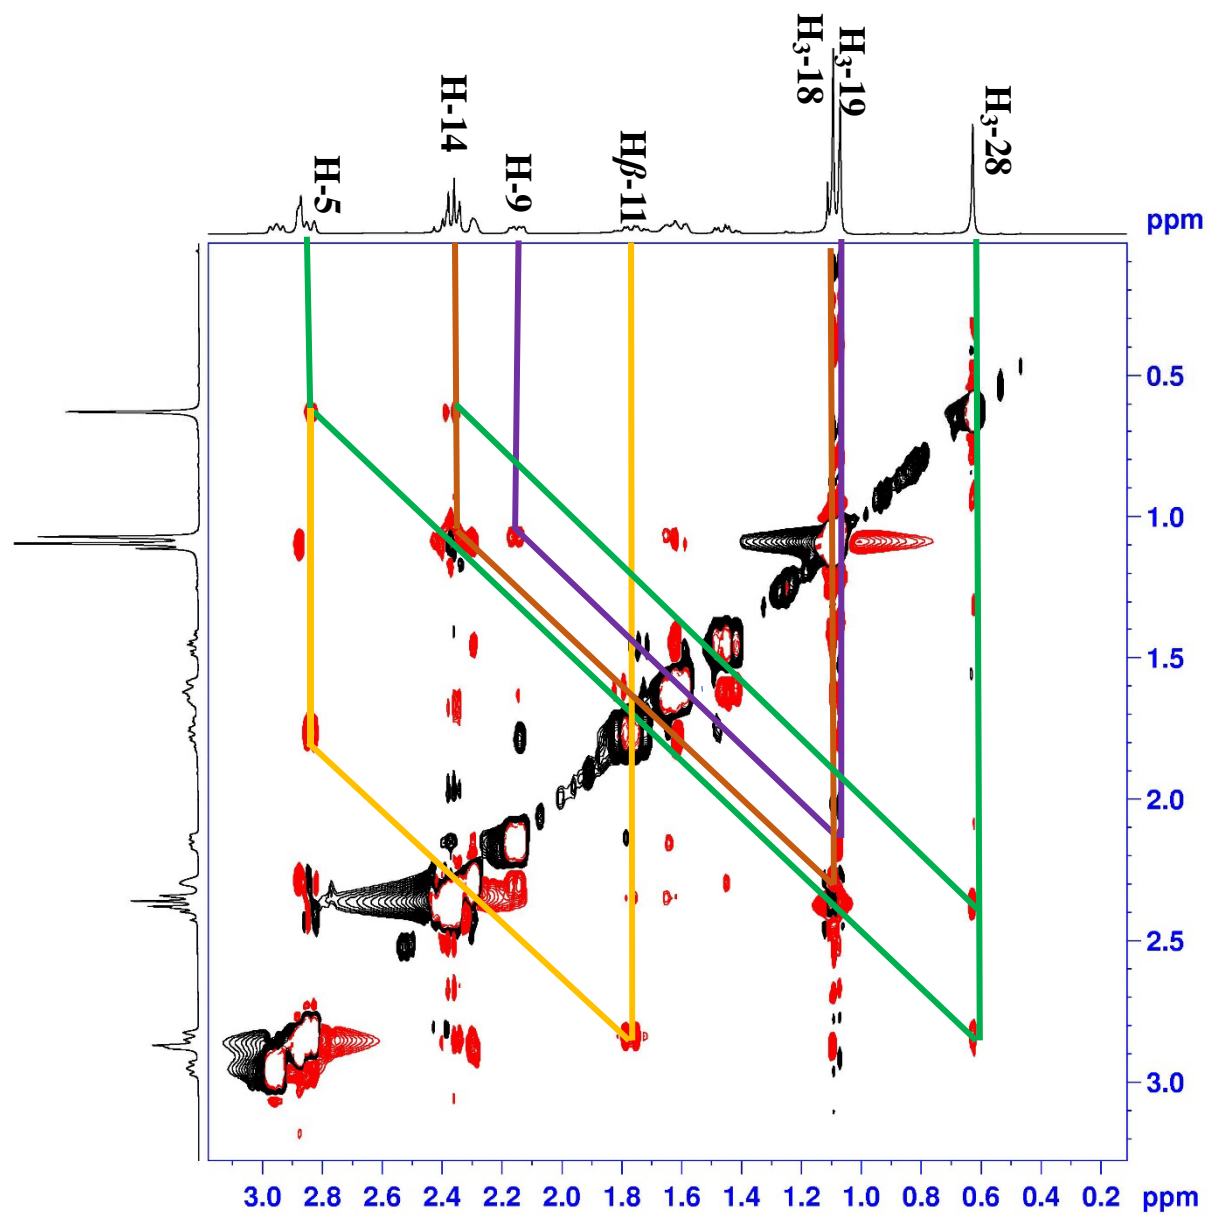



# HR-ESIMS for compound 3

## Generic Display Report

### Analysis Info

Analysis Name D:\Data\MS\data\201805\liwanshan\_P-18-3-1\_pos\_40\_01\_4670.d  
Method LC\_Direct Infusion\_pos\_100-1000mz.m  
Sample Name liwanshan\_P-18-3-1\_pos  
Comment

Acquisition Date 5/4/2018 11:54:44 AM

Operator SCSIO  
Instrument maXis

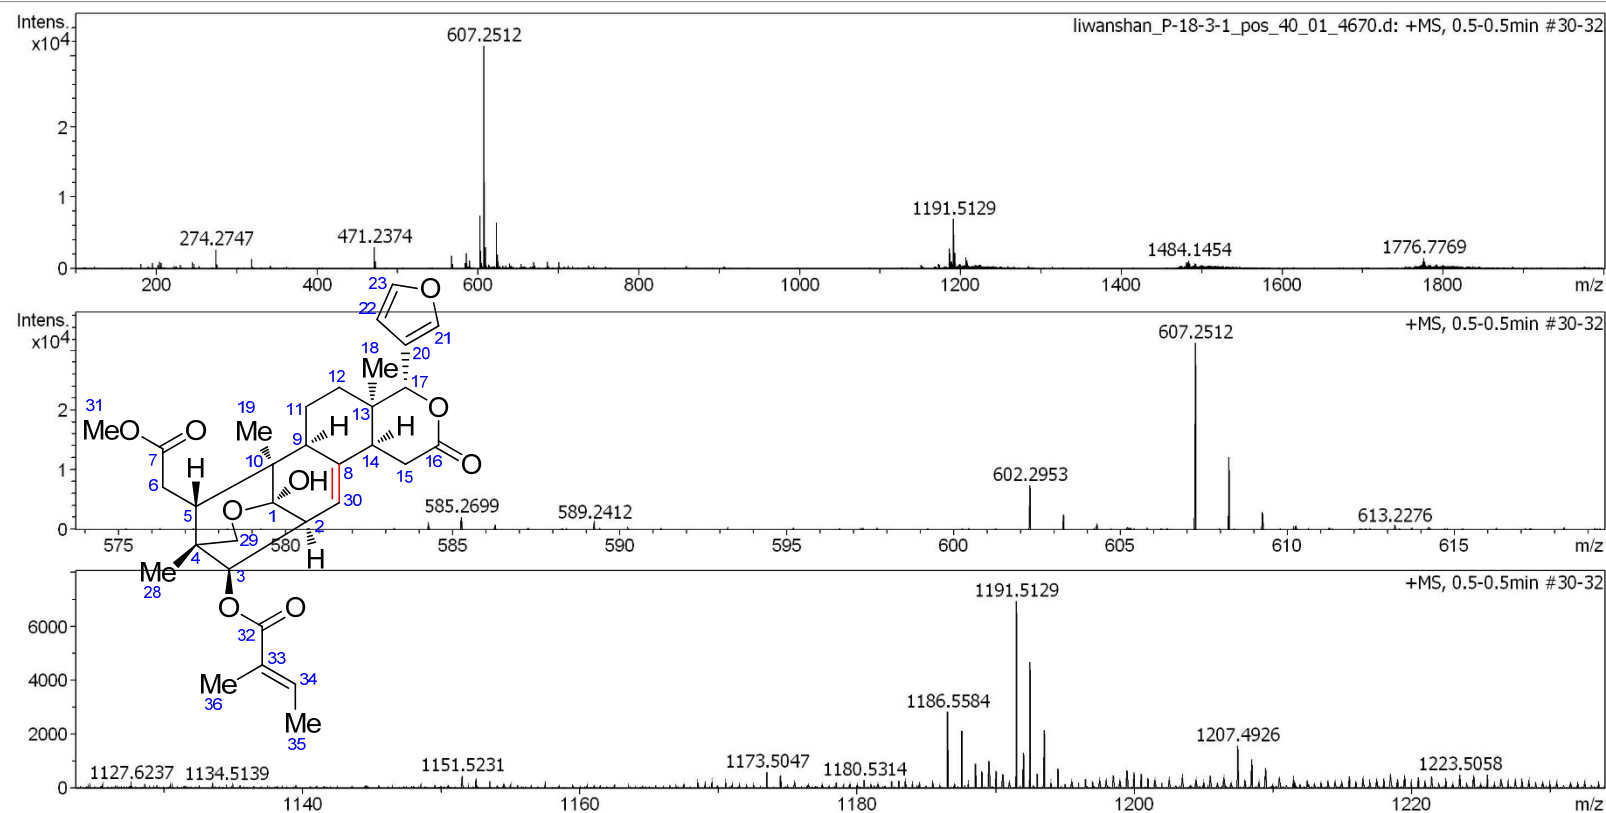

# HR-ESIMS for compound 3

## Mass Spectrum SmartFormula Report

### Analysis Info

Analysis Name D:\Data\MS\data\201805\liwanshan\_P-18-3-1\_pos\_40\_01\_4670.d  
Method LC\_Direct Infusion\_pos\_100-1000mz.m  
Sample Name liwanshan\_P-18-3-1\_pos  
Comment

Acquisition Date 5/4/2018 11:54:44 AM  
Operator SCSIO  
Instrument maXis 255552.00029

### Acquisition Parameter

|             |          |                      |          |                  |           |
|-------------|----------|----------------------|----------|------------------|-----------|
| Source Type | ESI      | Ion Polarity         | Positive | Set Nebulizer    | 0.4 Bar   |
| Focus       | Active   | Set Capillary        | 4500 V   | Set Dry Heater   | 180 °C    |
| Scan Begin  | 100 m/z  | Set End Plate Offset | -500 V   | Set Dry Gas      | 4.0 l/min |
| Scan End    | 2000 m/z | Set Charging Voltage | 0 V      | Set Divert Valve | Waste     |
|             |          | Set Corona           | 0 nA     | Set APCI Heater  | 0 °C      |

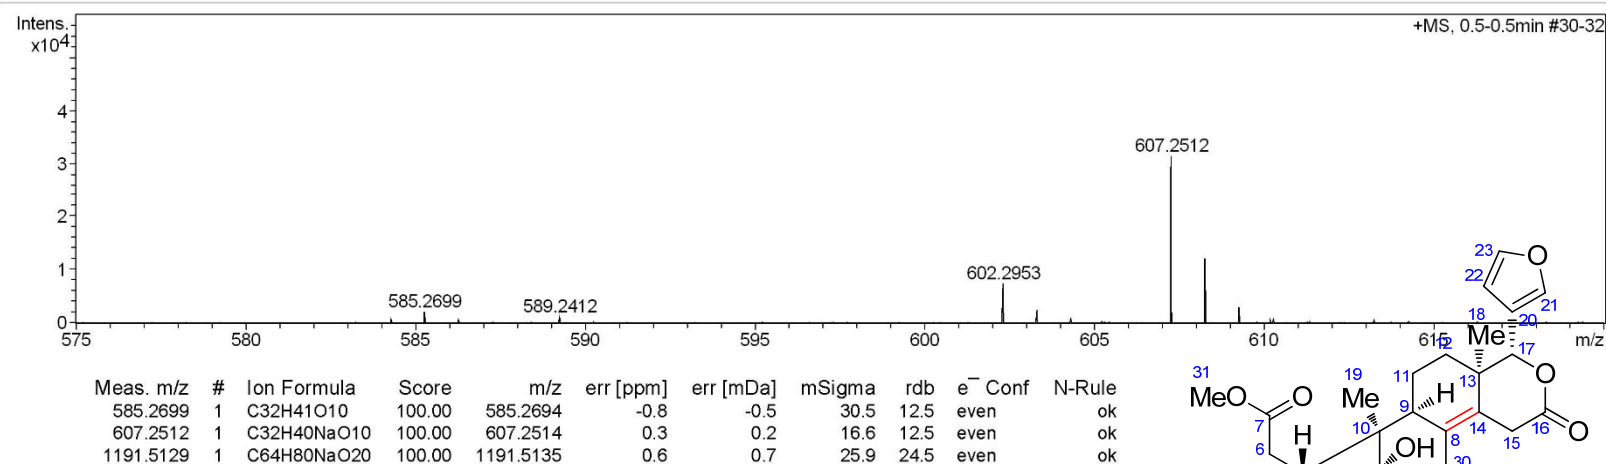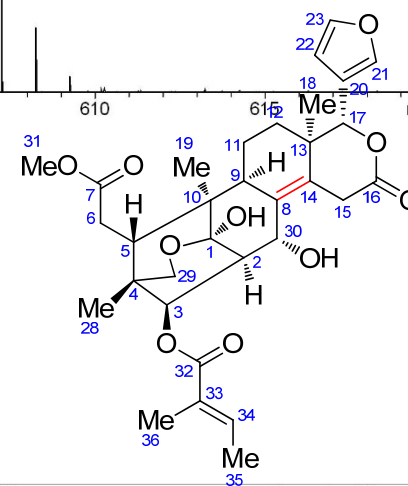

$^1\text{H}$  NMR (400 MHz) spectrum of compound **3** in  $\text{CDCl}_3$

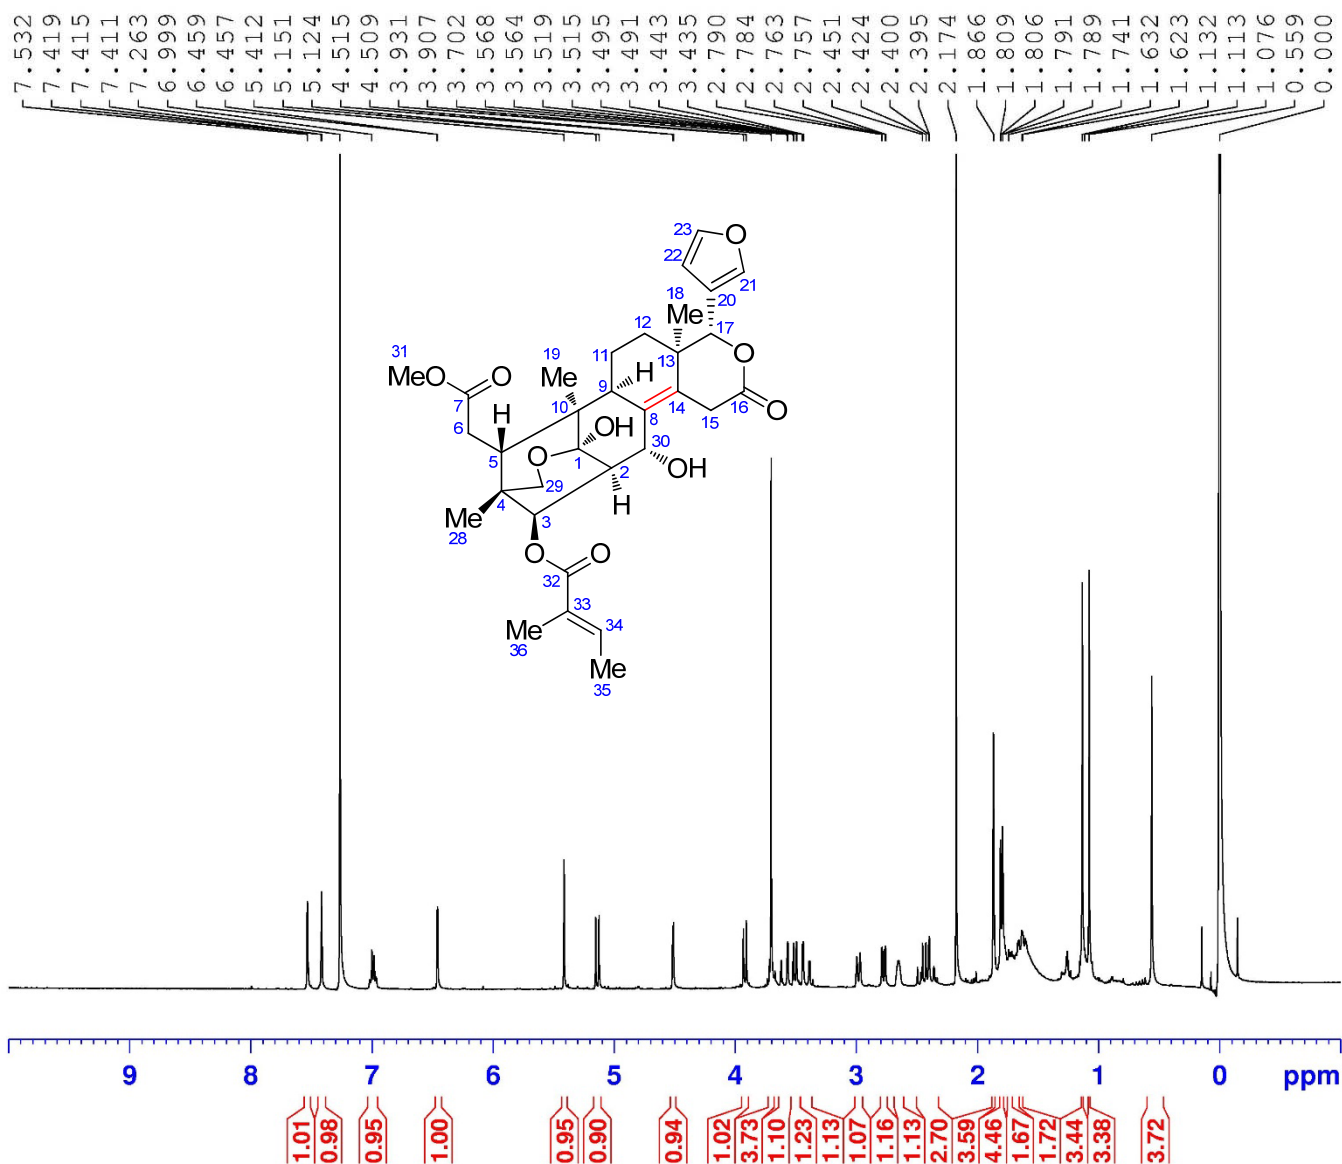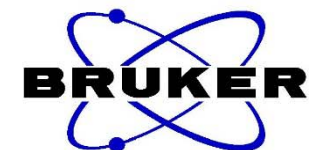

NAME ZXP-R-18-3-1-3-3 new  
 EXPNO 1  
 PROCNO 1  
 Date\_ 20180109  
 Time 8.01  
 INSTRUM spect  
 PROBHD 5 mm CPPBBO BB  
 PULPROG zg30  
 TD 65536  
 SOLVENT  $\text{CDCl}_3$   
 NS 16  
 DS 2  
 SWH 8223.685 Hz  
 FIDRES 0.125483 Hz  
 AQ 3.9846387 sec  
 RG 208.5  
 DW 60.800 usec  
 DE 10.00 usec  
 TE 297.0 K  
 D1 1.00000000 sec  
 TD0 1

===== CHANNEL f1 =====  
 SFO1 400.1324710 MHz  
 NUC1  $^1\text{H}$   
 P1 11.50 usec  
 SI 65536  
 SF 400.1300087 MHz  
 WDW EM  
 SSB 0  
 LB 0.30 Hz  
 GB 0  
 PC 1.00

$^1\text{H}$  NMR (400 MHz) spectrum of compound **3** in  $\text{CDCl}_3$

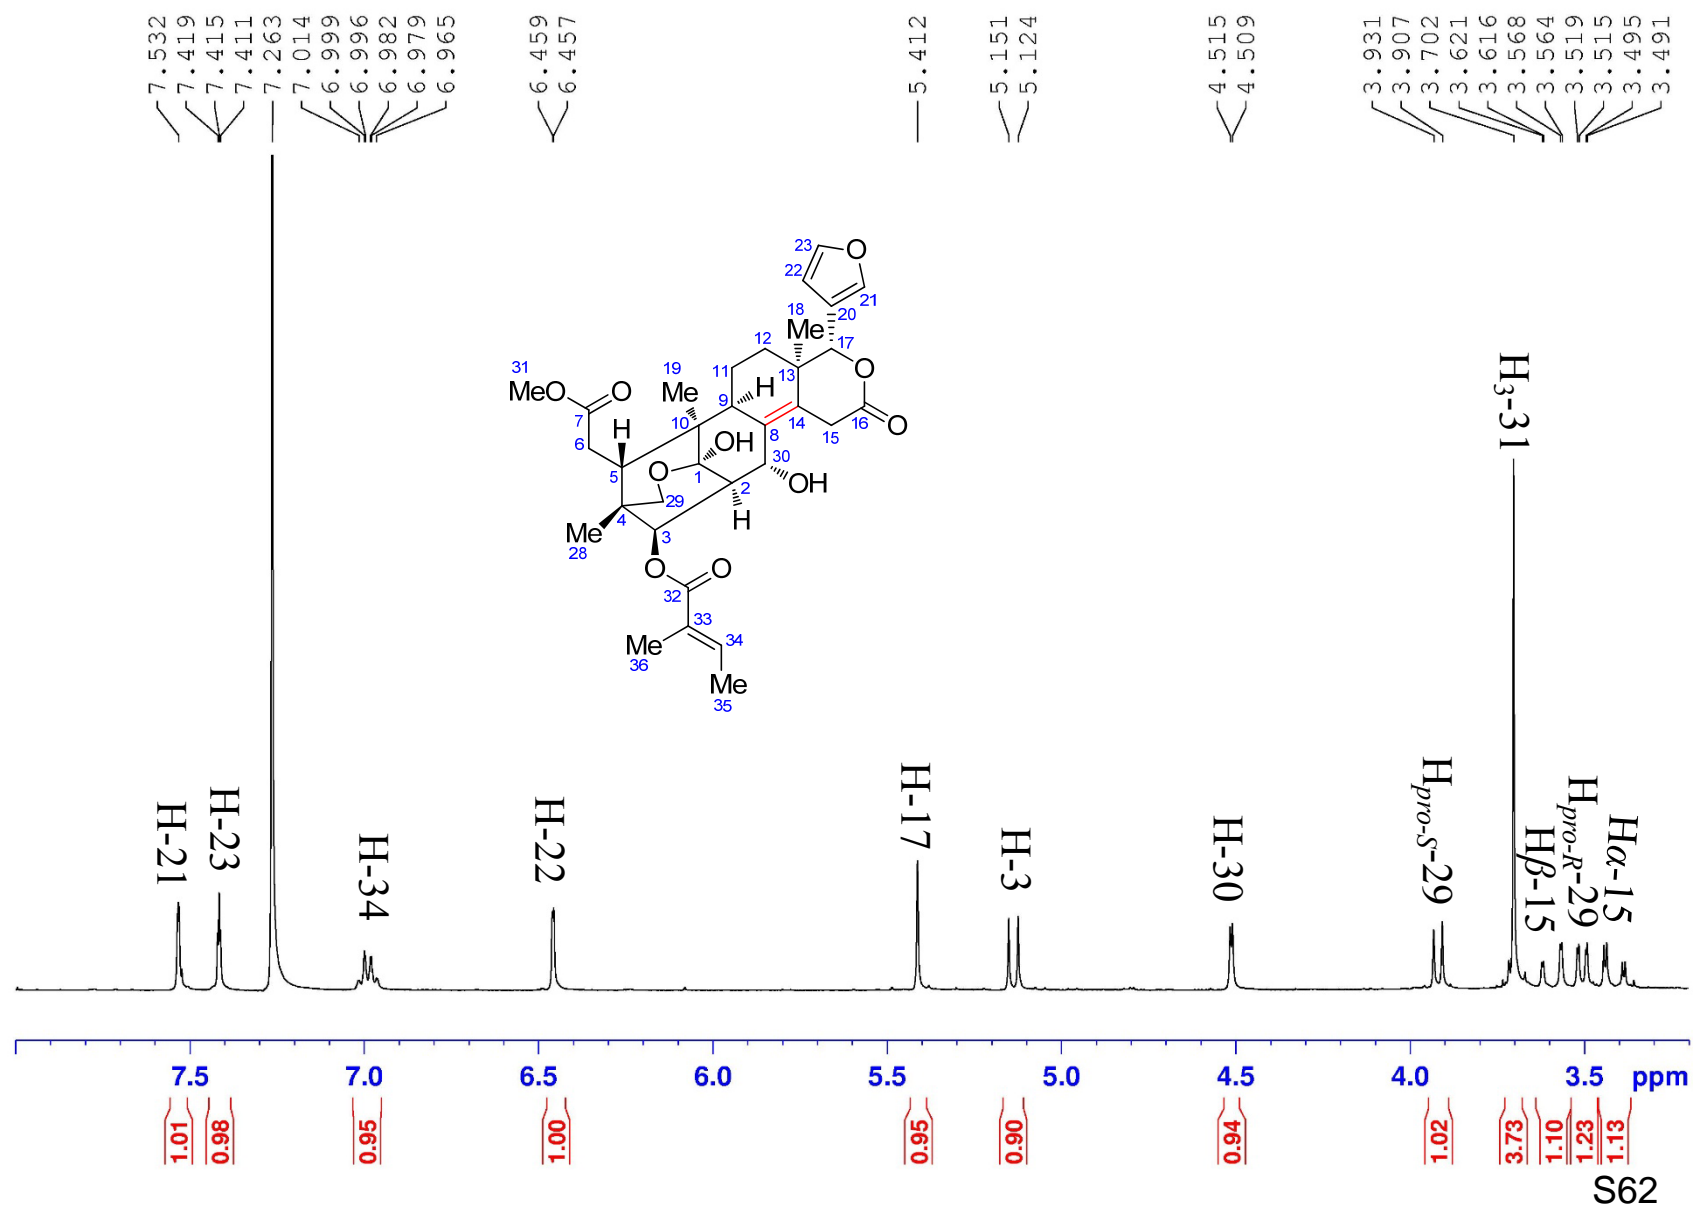

$^1\text{H}$  NMR (400 MHz) spectrum of compound **3** in  $\text{CDCl}_3$

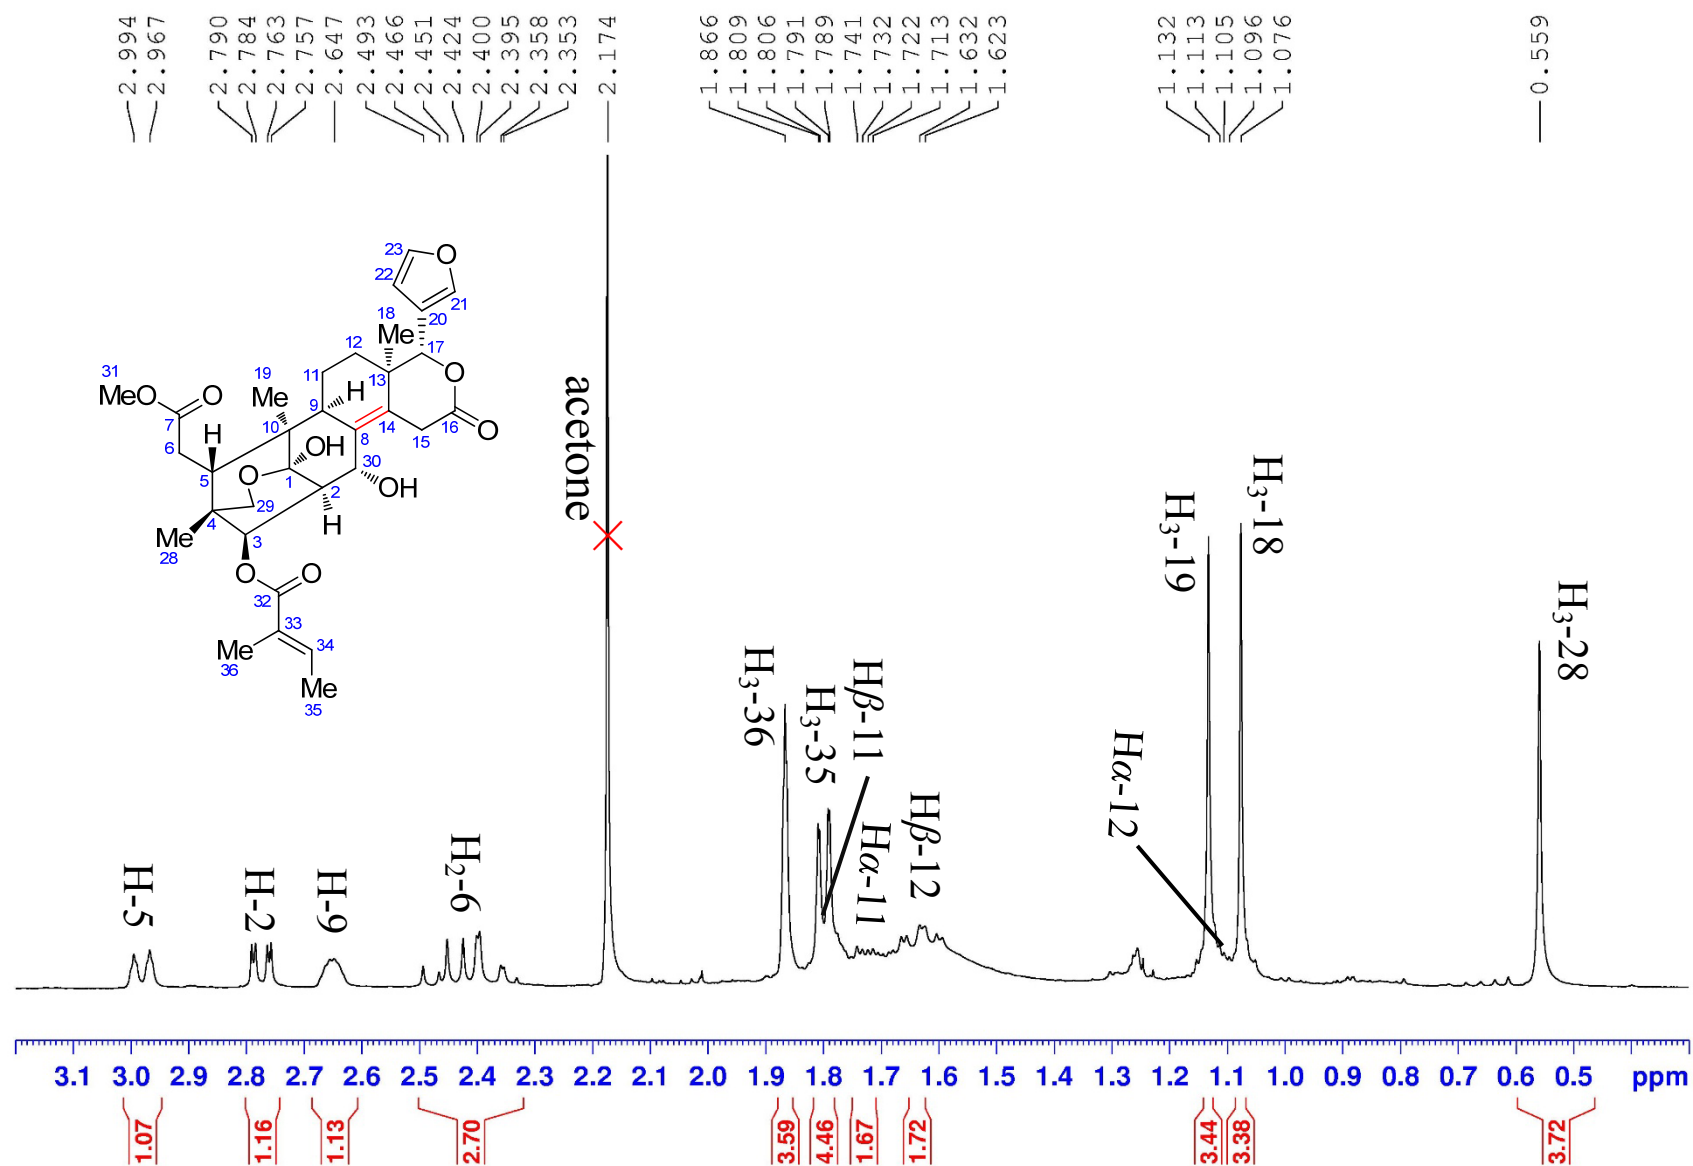

$^{13}\text{C}$  NMR (100 MHz) spectrum of compound **3** in  $\text{CDCl}_3$

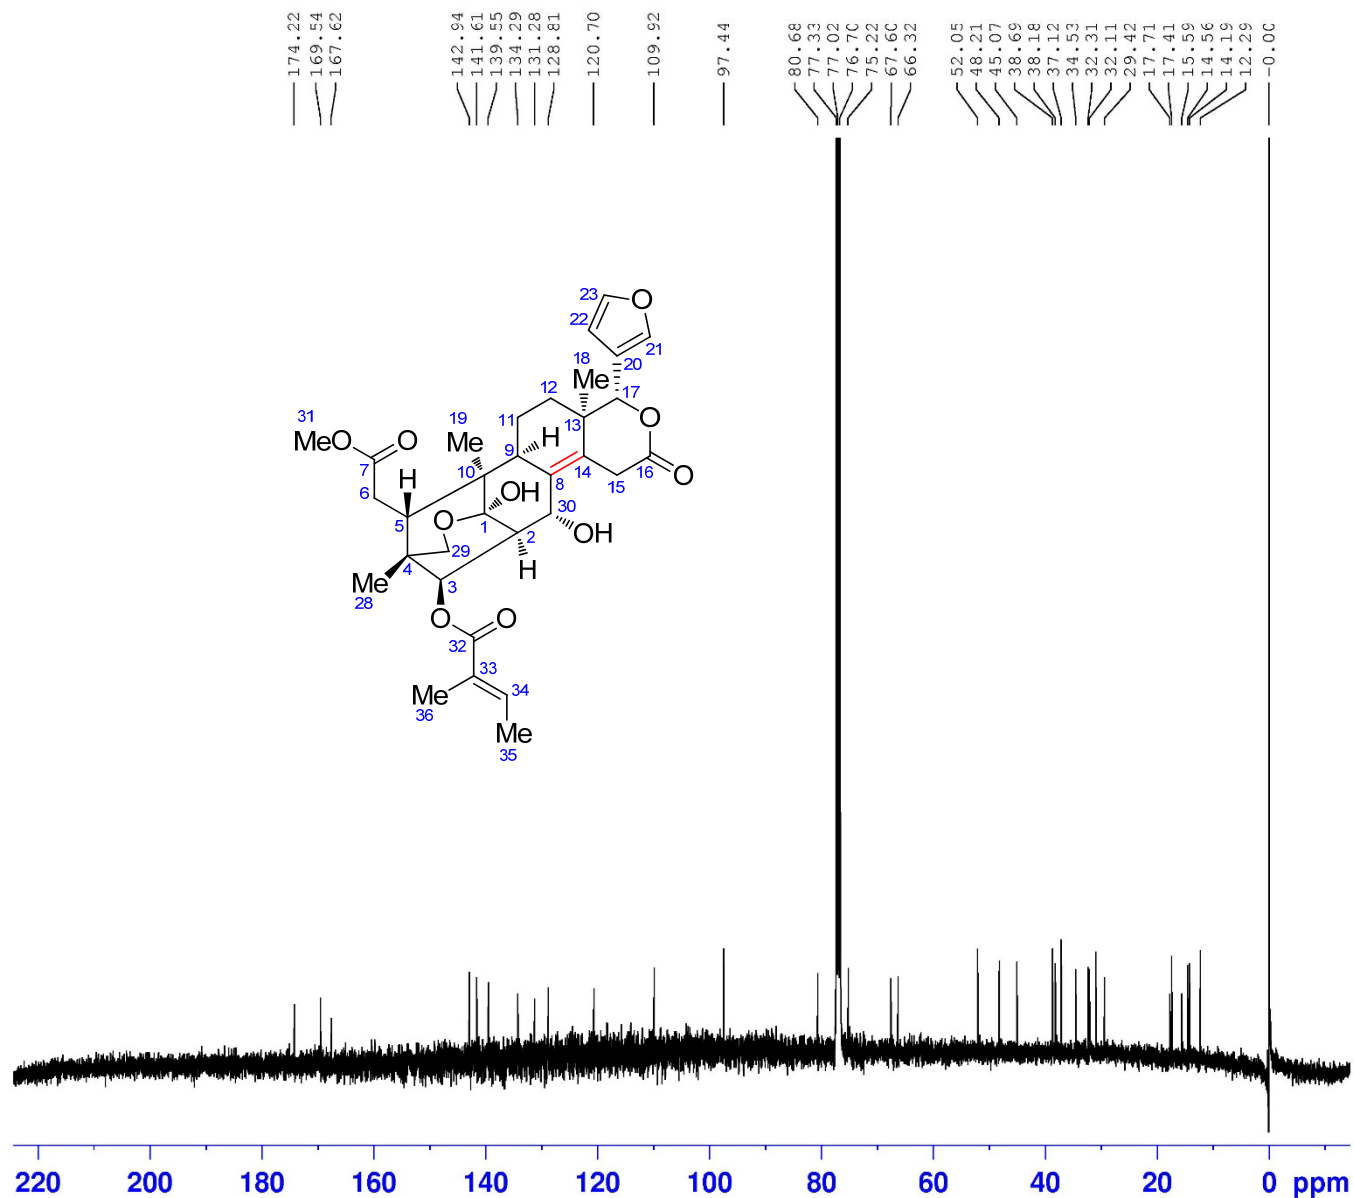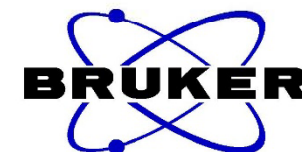

NAME ZXP-R-18-3-1-3-3 new  
 EXPNO 2  
 PROCNO 1  
 Date\_ 20180109  
 Time 9.01  
 INSTRUM spect  
 PROBHD 5 mm CPPBBO BB  
 PULPROG zgpg30  
 TD 65536  
 SOLVENT  $\text{CDCl}_3$   
 NS 1024  
 DS 4  
 SWH 24038.461 Hz  
 FIDRES 0.366798 Hz  
 AQ 1.3631988 sec  
 RG 73.92  
 DW 20.800 usec  
 DE 18.00 usec  
 TE 297.0 K  
 D1 2.00000000 sec  
 D11 0.03000000 sec  
 TD0 1

===== CHANNEL f1 =====  
 SFO1 100.6233324 MHz  
 NUC1  $^{13}\text{C}$   
 P1 10.00 usec  
 SI 32768  
 SF 100.6127690 MHz  
 WDW EM  
 SSB 0  
 LB 1.00 Hz  
 GB 0  
 PC 1.40

$^{13}\text{C}$  NMR (100 MHz) spectrum of compound **3** in  $\text{CDCl}_3$

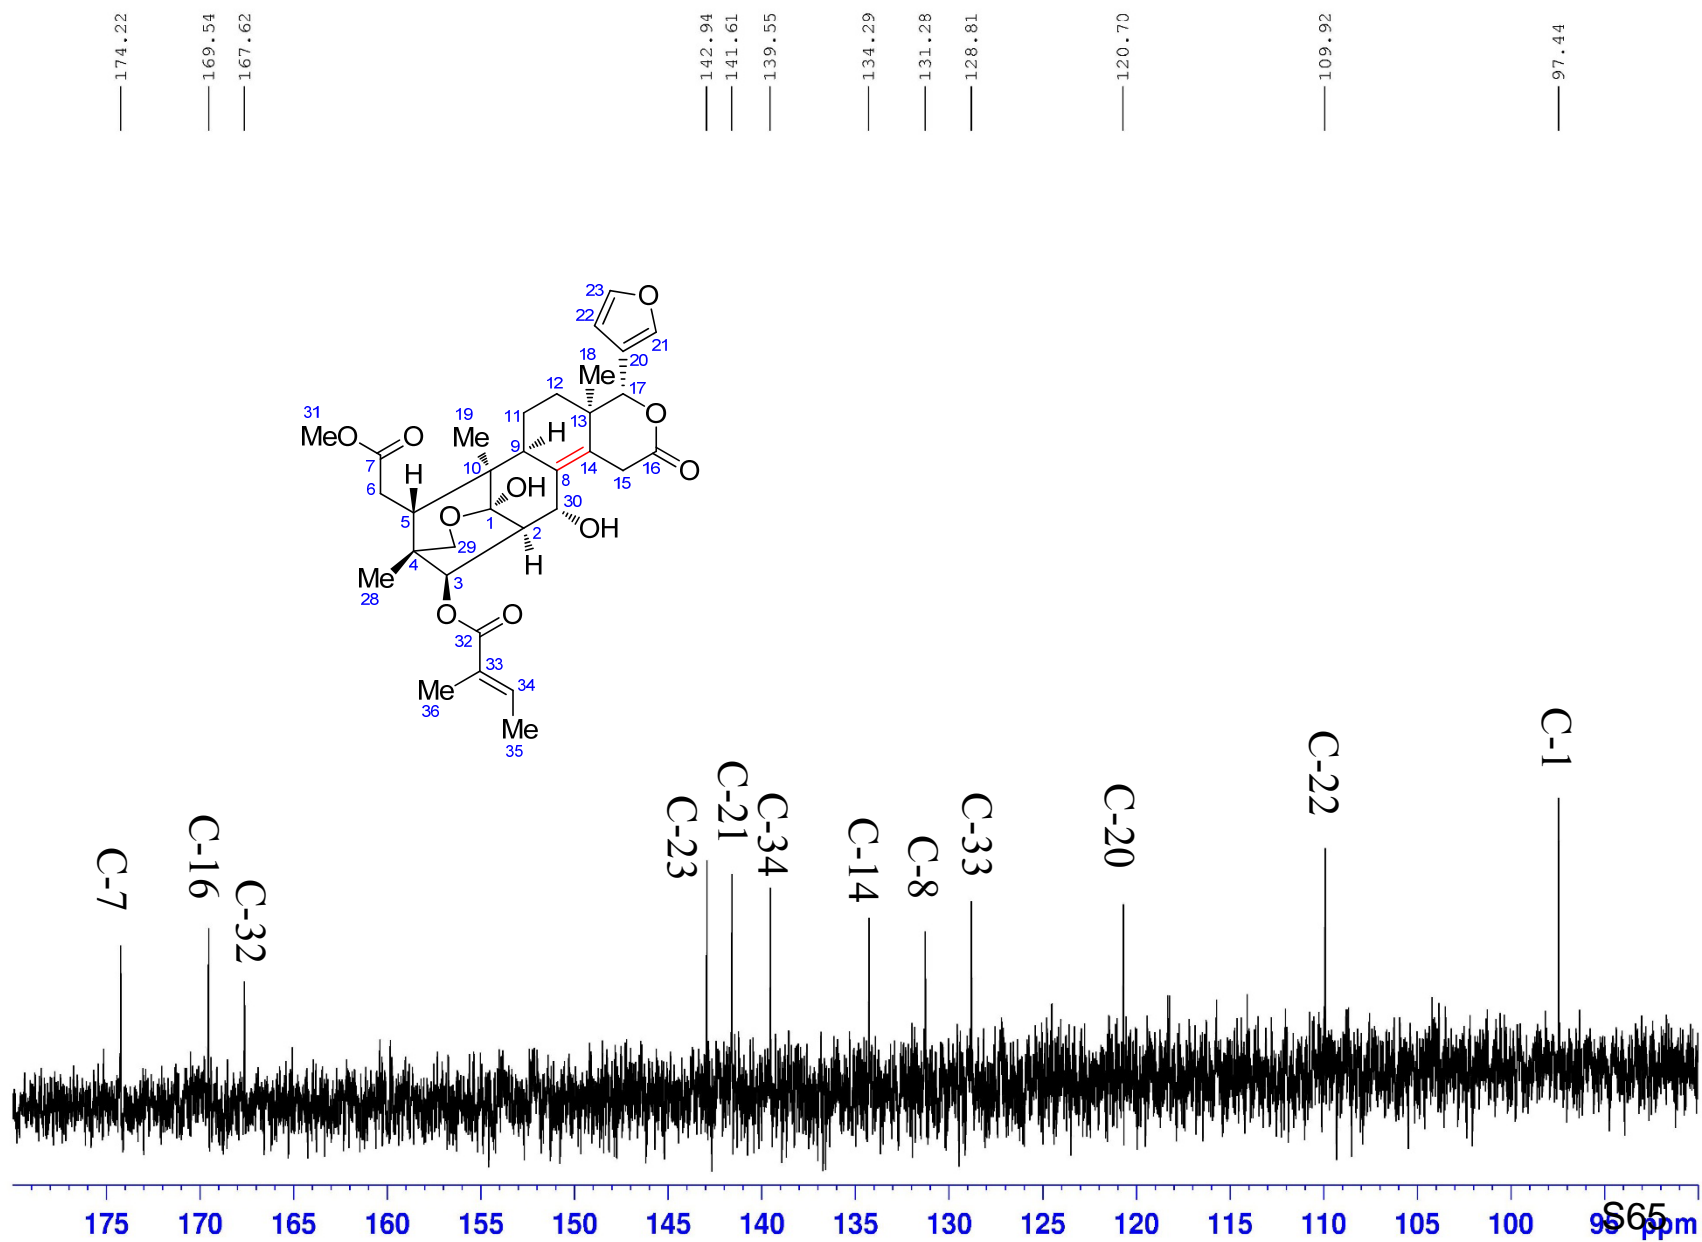

$^{13}\text{C}$  NMR (100 MHz) spectrum of compound **3** in  $\text{CDCl}_3$

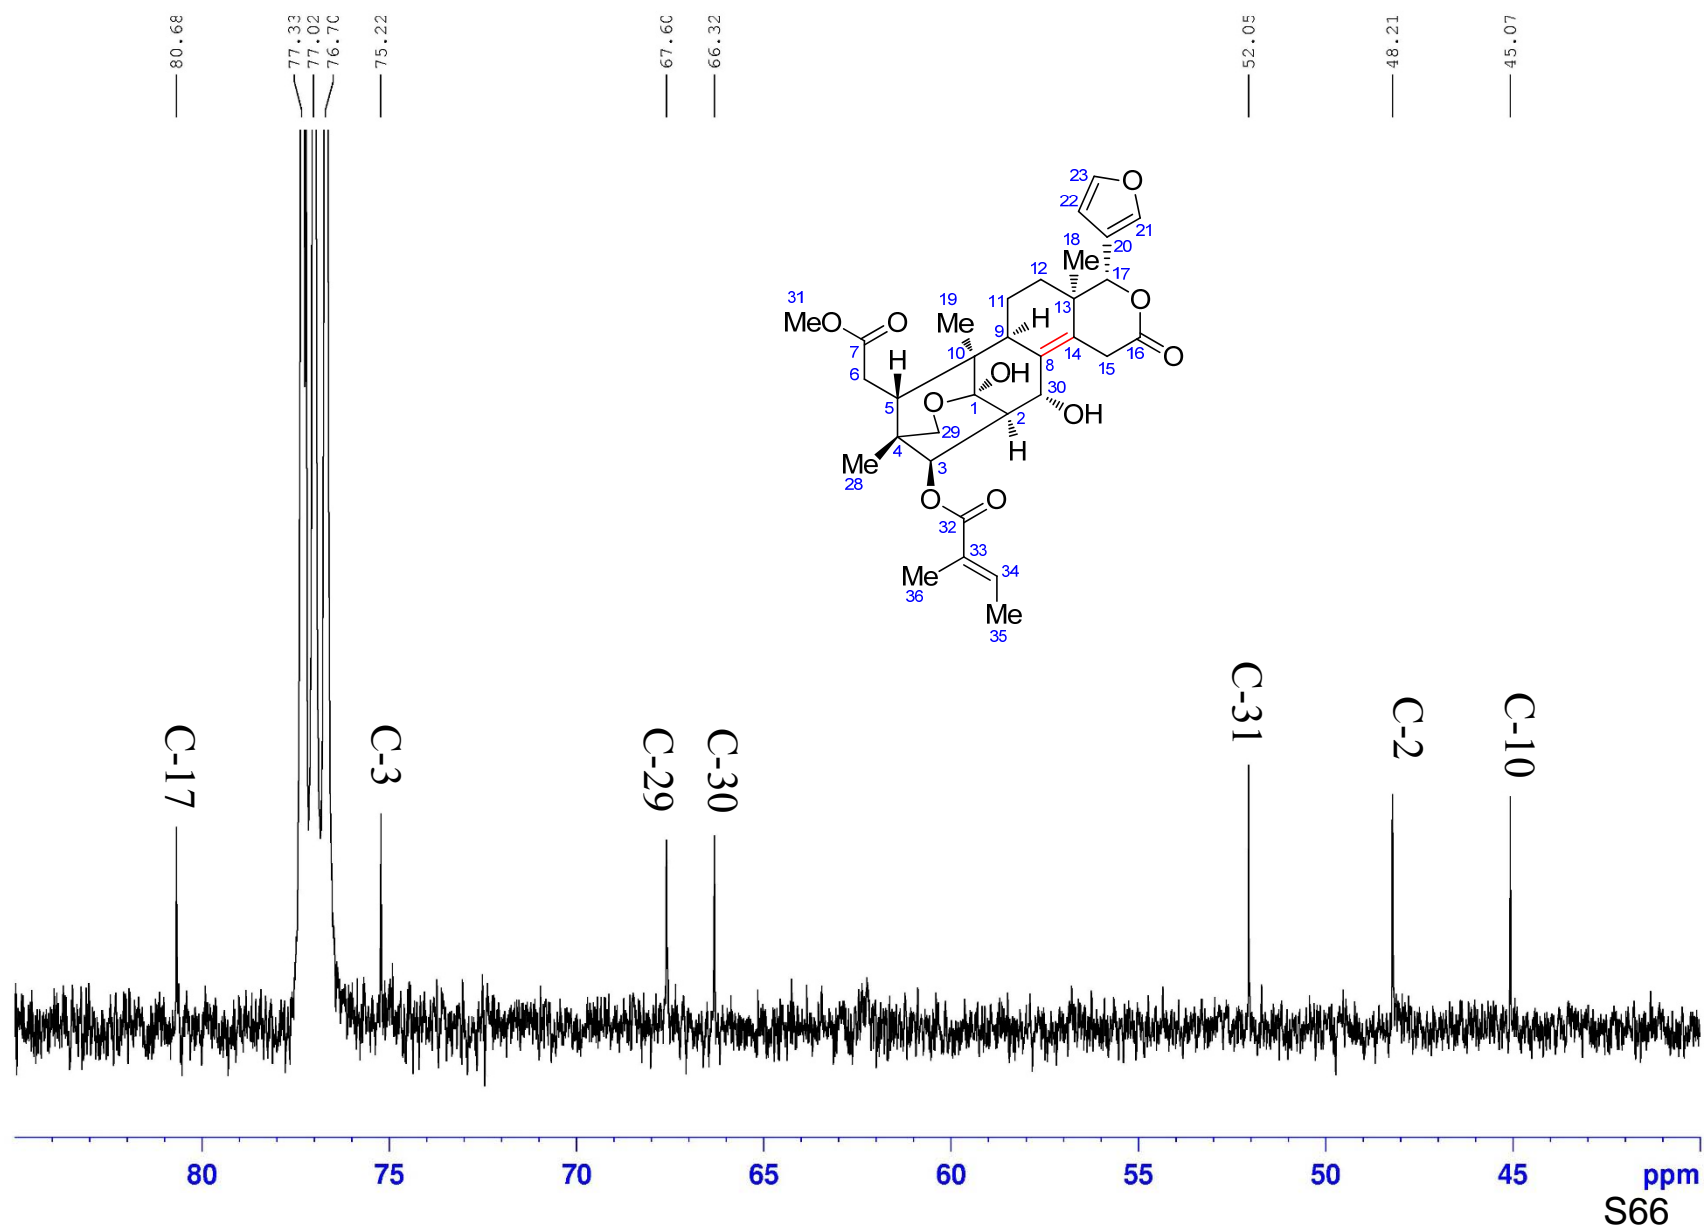



$^{13}\text{C}$  NMR (100 MHz) spectrum of compound **3** in  $\text{CDCl}_3$

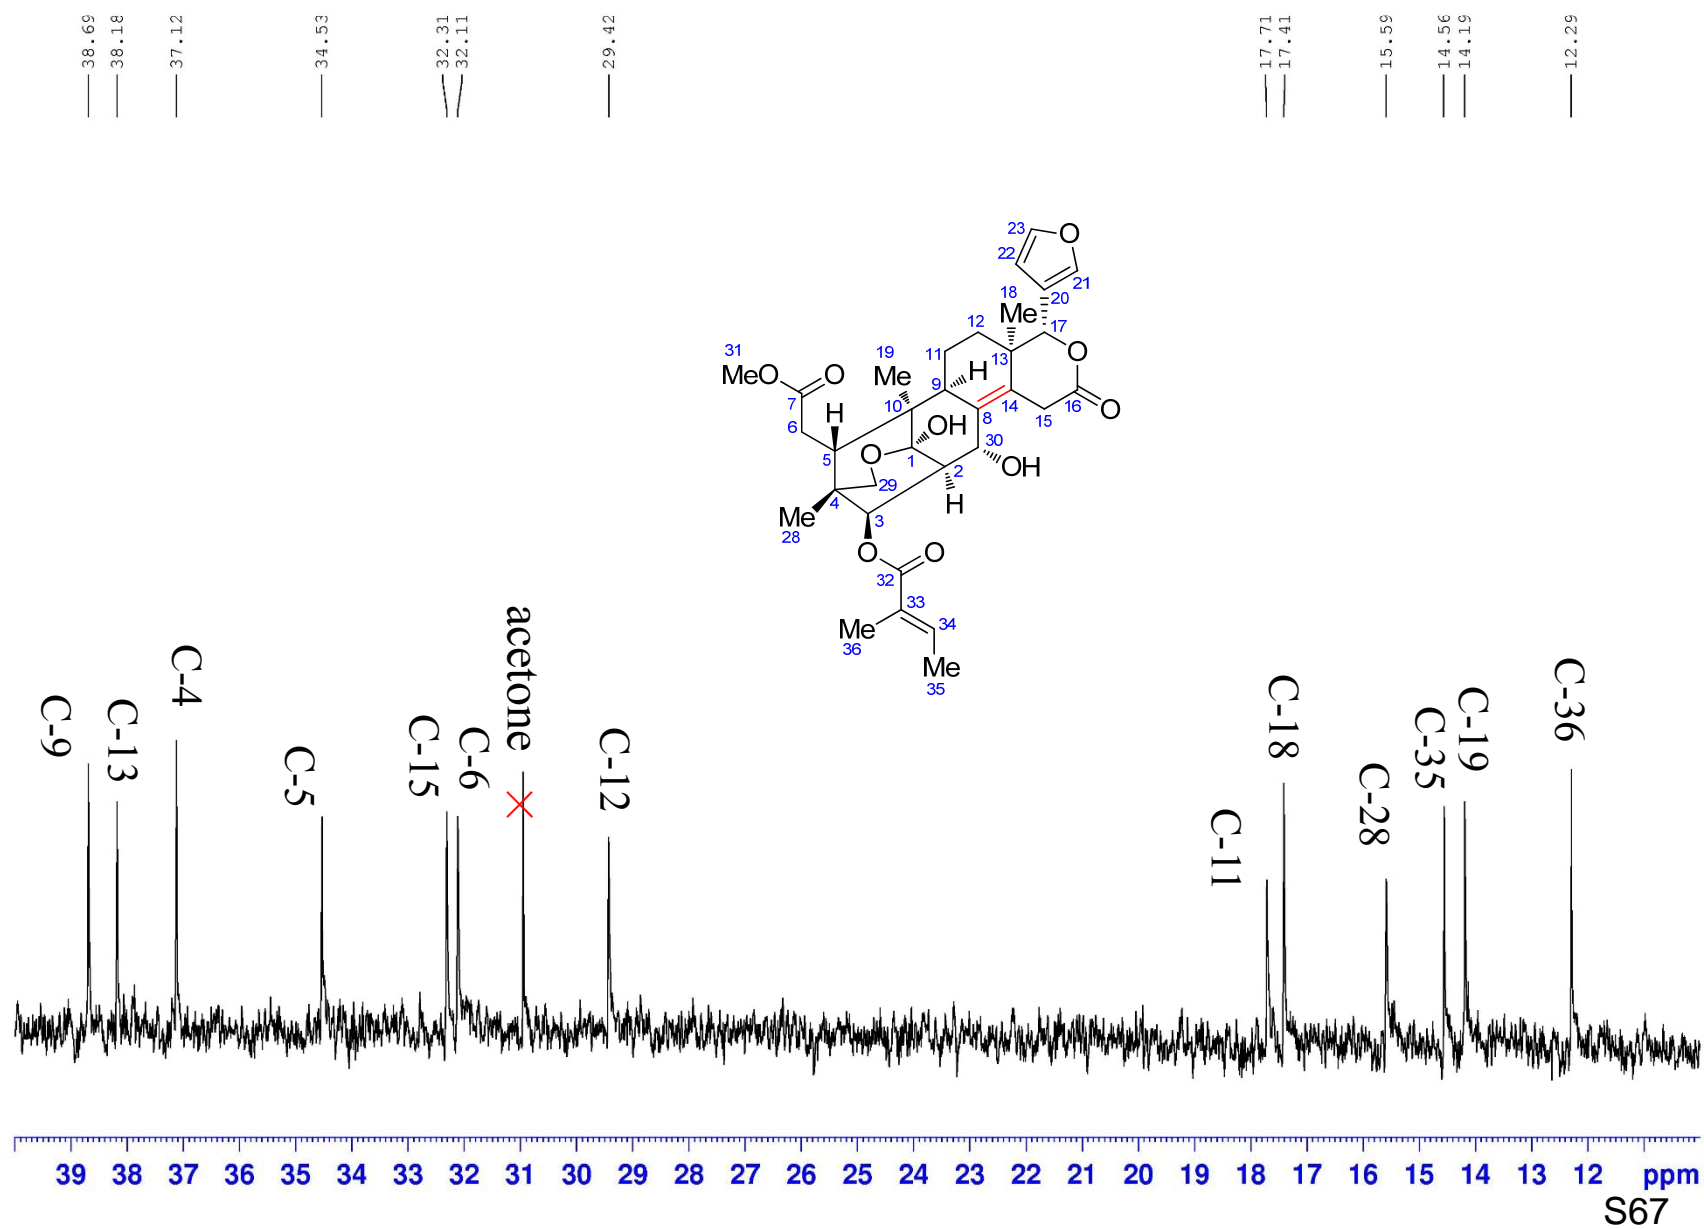

# DEPT135 (100 MHz) spectrum of compound **3** in CDCl<sub>3</sub>

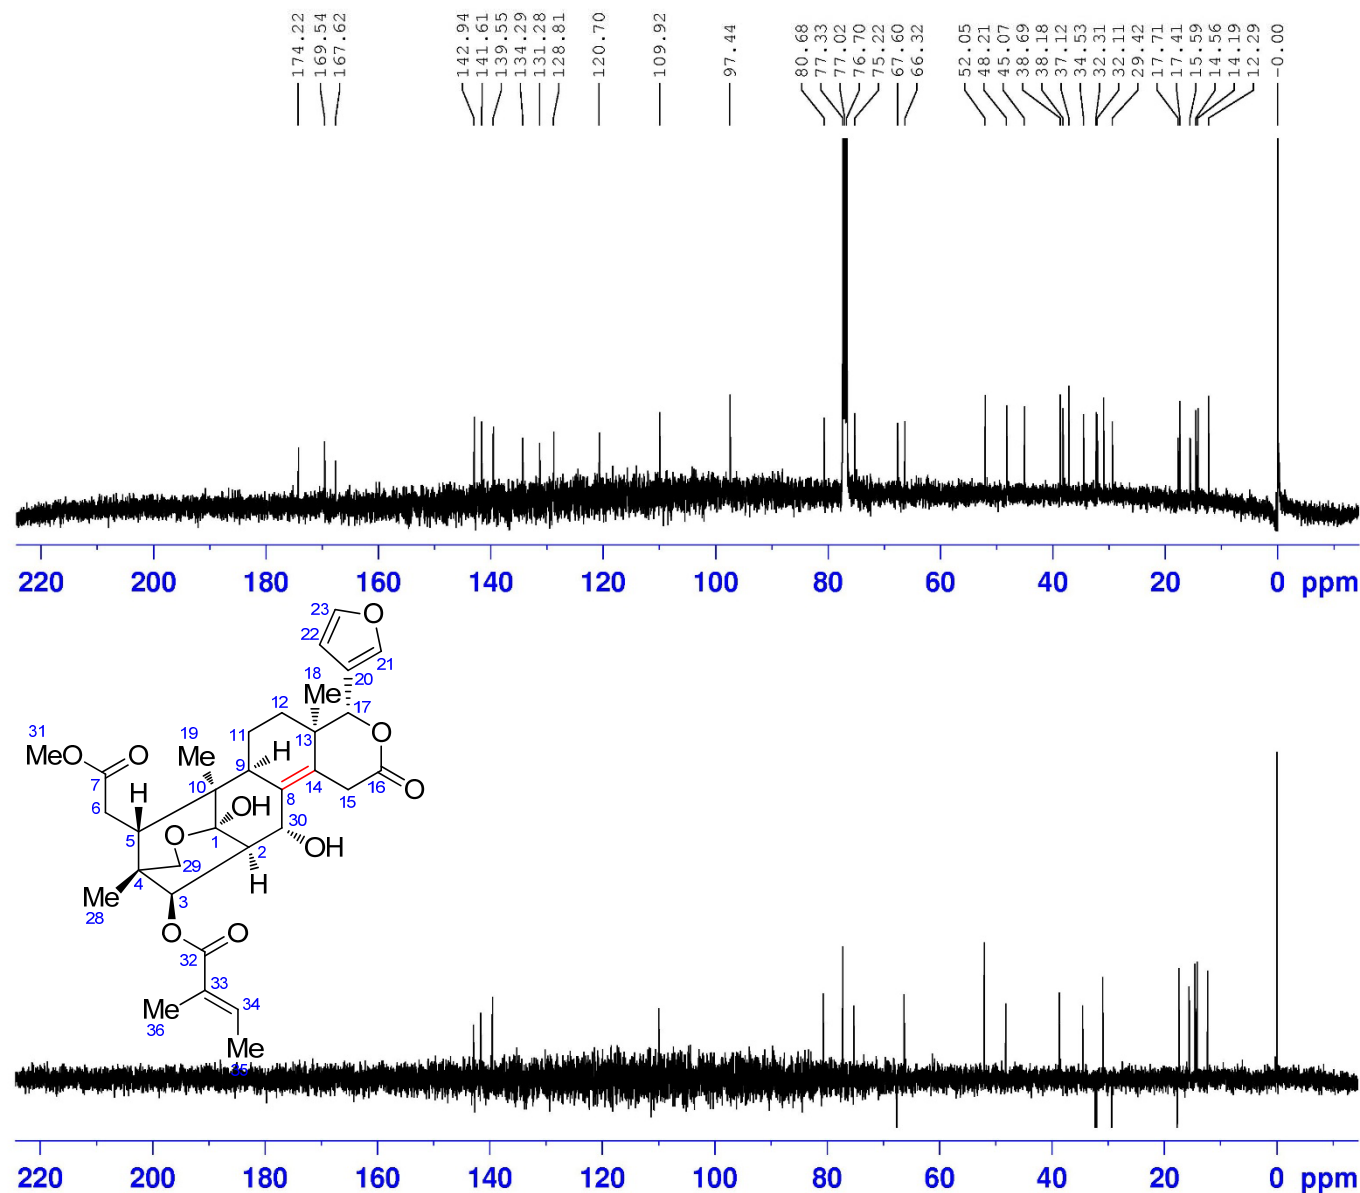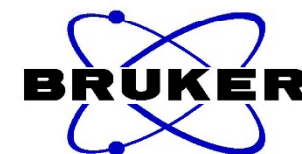

NAME ZXP-R-18-3-1-3-3 new  
 EXPNO 2  
 PROCNO 1  
 Date\_ 20180109  
 Time 9.01  
 INSTRUM spect  
 PROBHD 5 mm CPMBO BB  
 PULPROG zgpg30  
 TD 65536  
 SOLVENT CDCl3  
 NS 1024  
 DS 4  
 SWH 24038.461 Hz  
 FIDRES 0.366798 Hz  
 AQ 1.3631988 sec  
 RG 73.92  
 DW 20.800 usec  
 DE 18.00 usec  
 TE 297.0 K  
 D1 2.00000000 sec  
 D11 0.03000000 sec  
 TD0 1

===== CHANNEL f1 =====  
 SFO1 100.623324 MHz  
 NUC1 13C  
 P1 10.00 usec  
 SI 32768  
 SF 100.6127690 MHz  
 WDW EM  
 SSB 0  
 LB 1.00 Hz  
 GB 0  
 PC 1.40

DEPT135 (100 MHz) spectrum of compound **3** in CDCl<sub>3</sub>

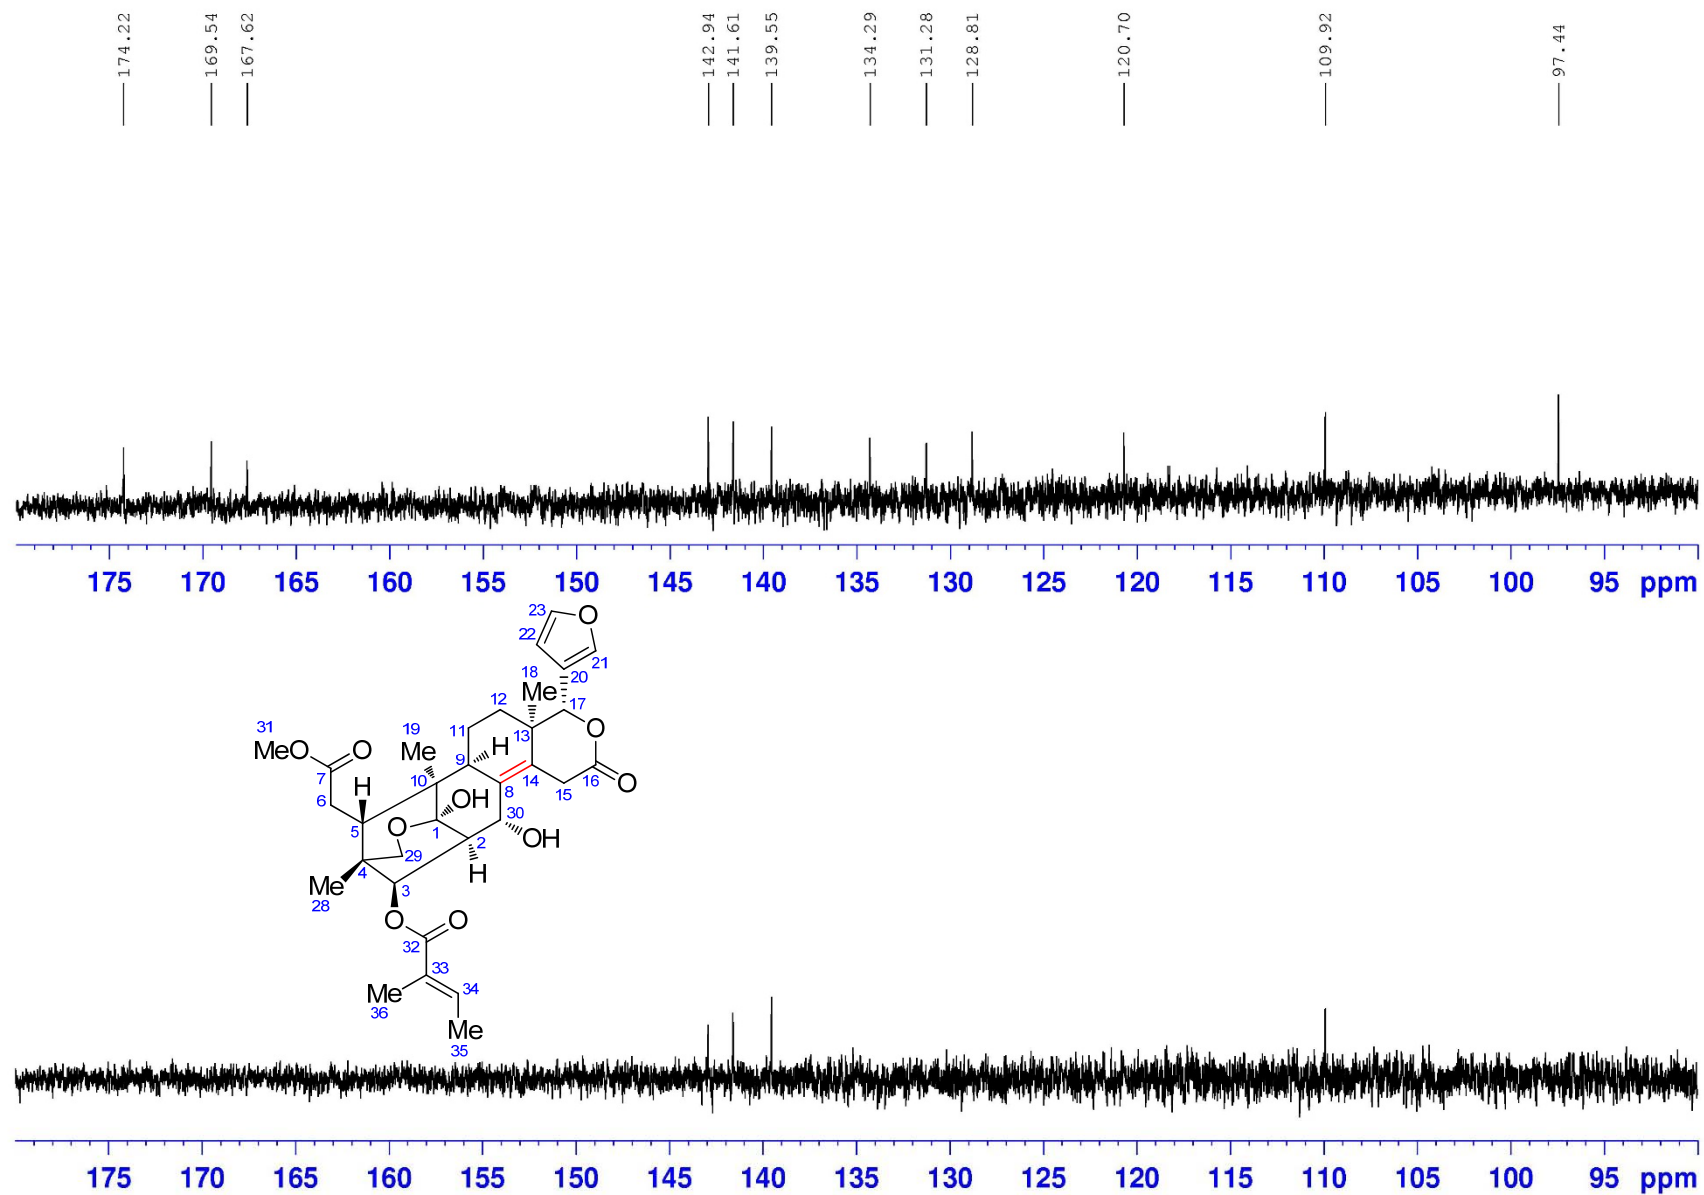

DEPT135 (100 MHz) spectrum of compound **3** in CDCl<sub>3</sub>

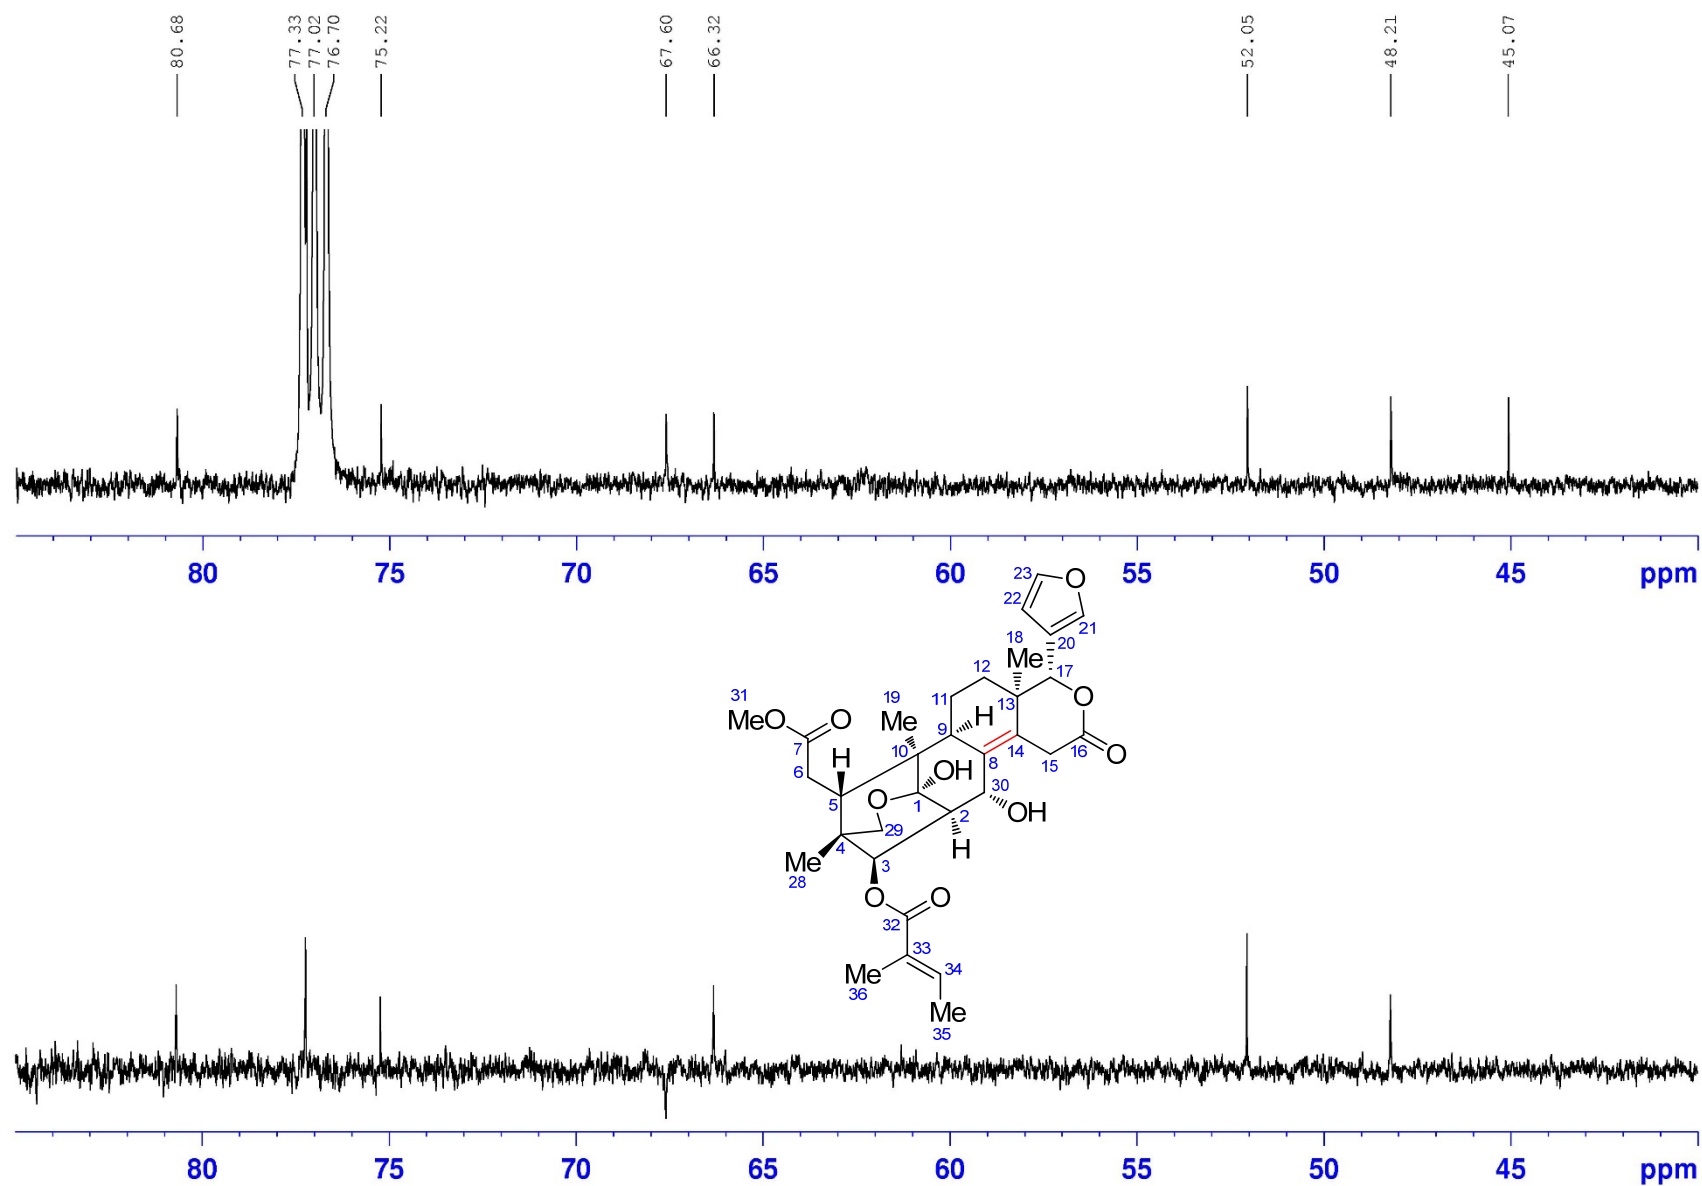

DEPT135 (100 MHz) spectrum of compound **3** in CDCl<sub>3</sub>

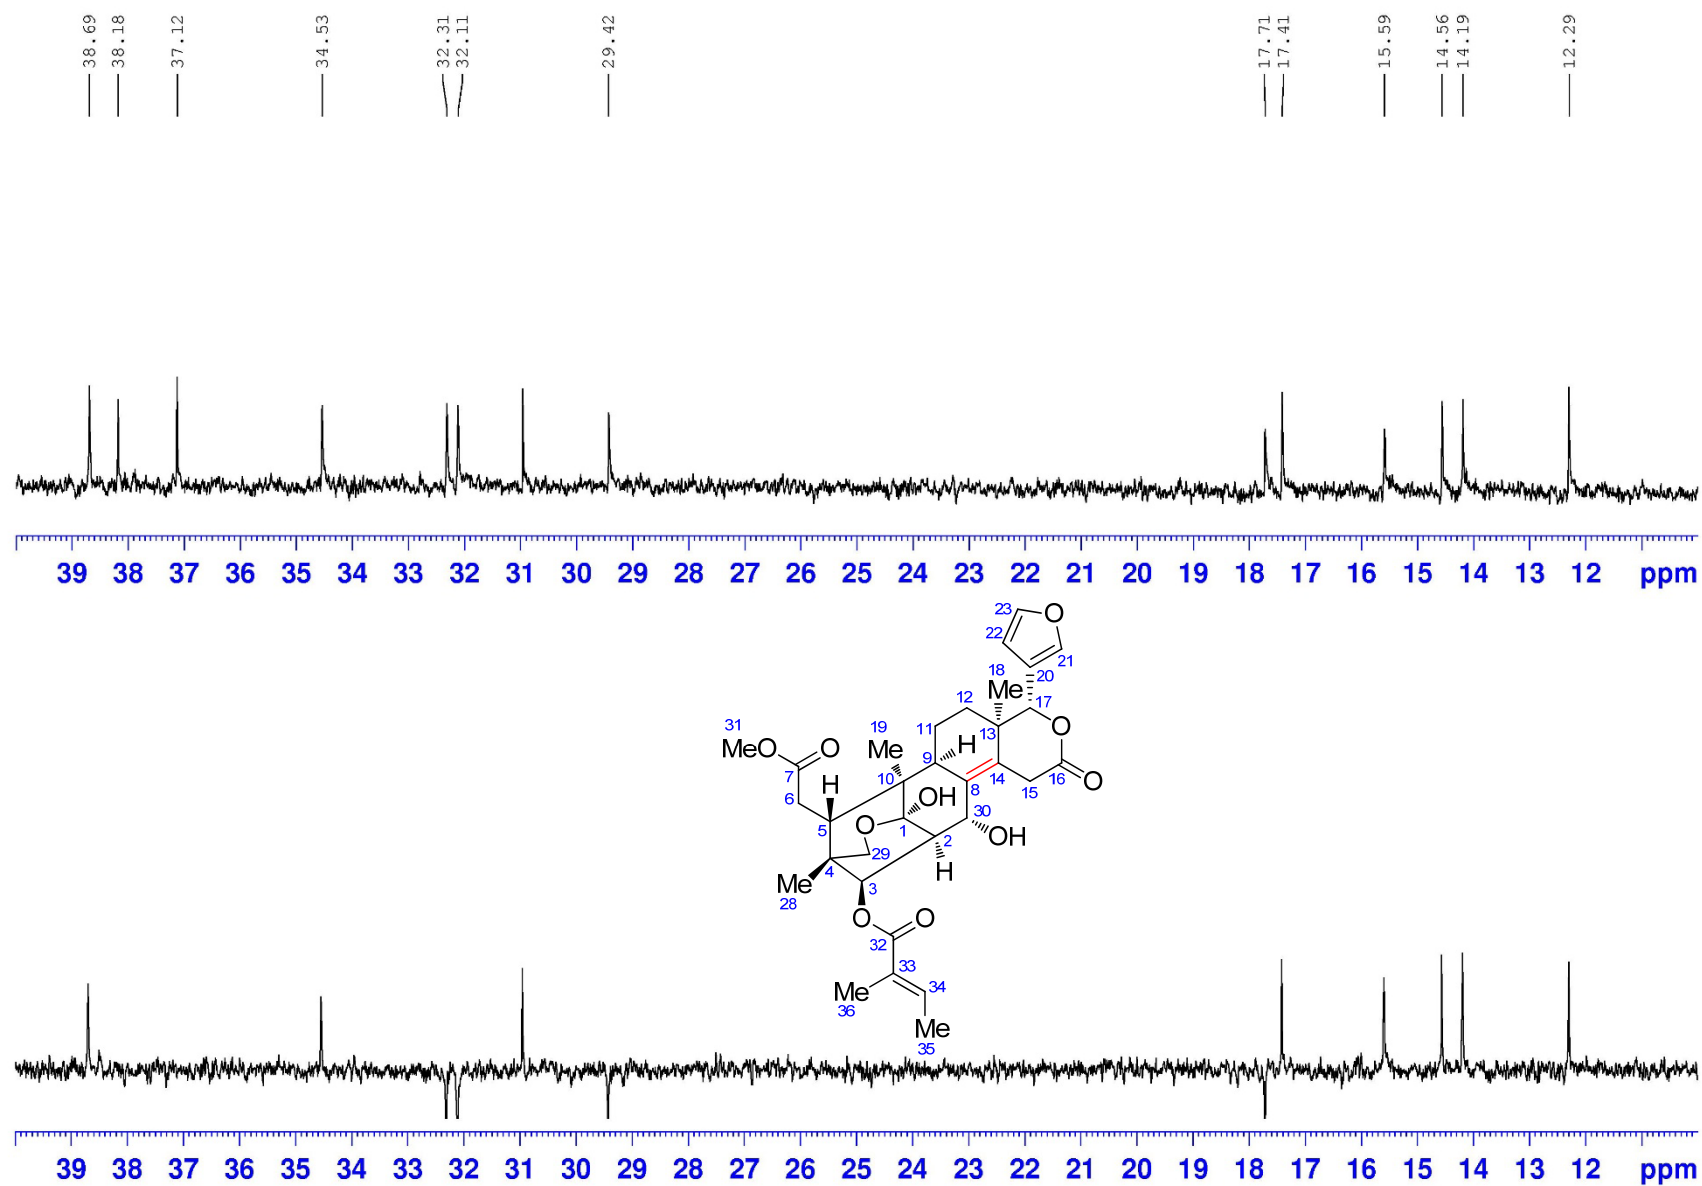

# $^1\text{H}$ - $^1\text{H}$ COSY (400 MHz) spectrum of compound **3** in $\text{CDCl}_3$

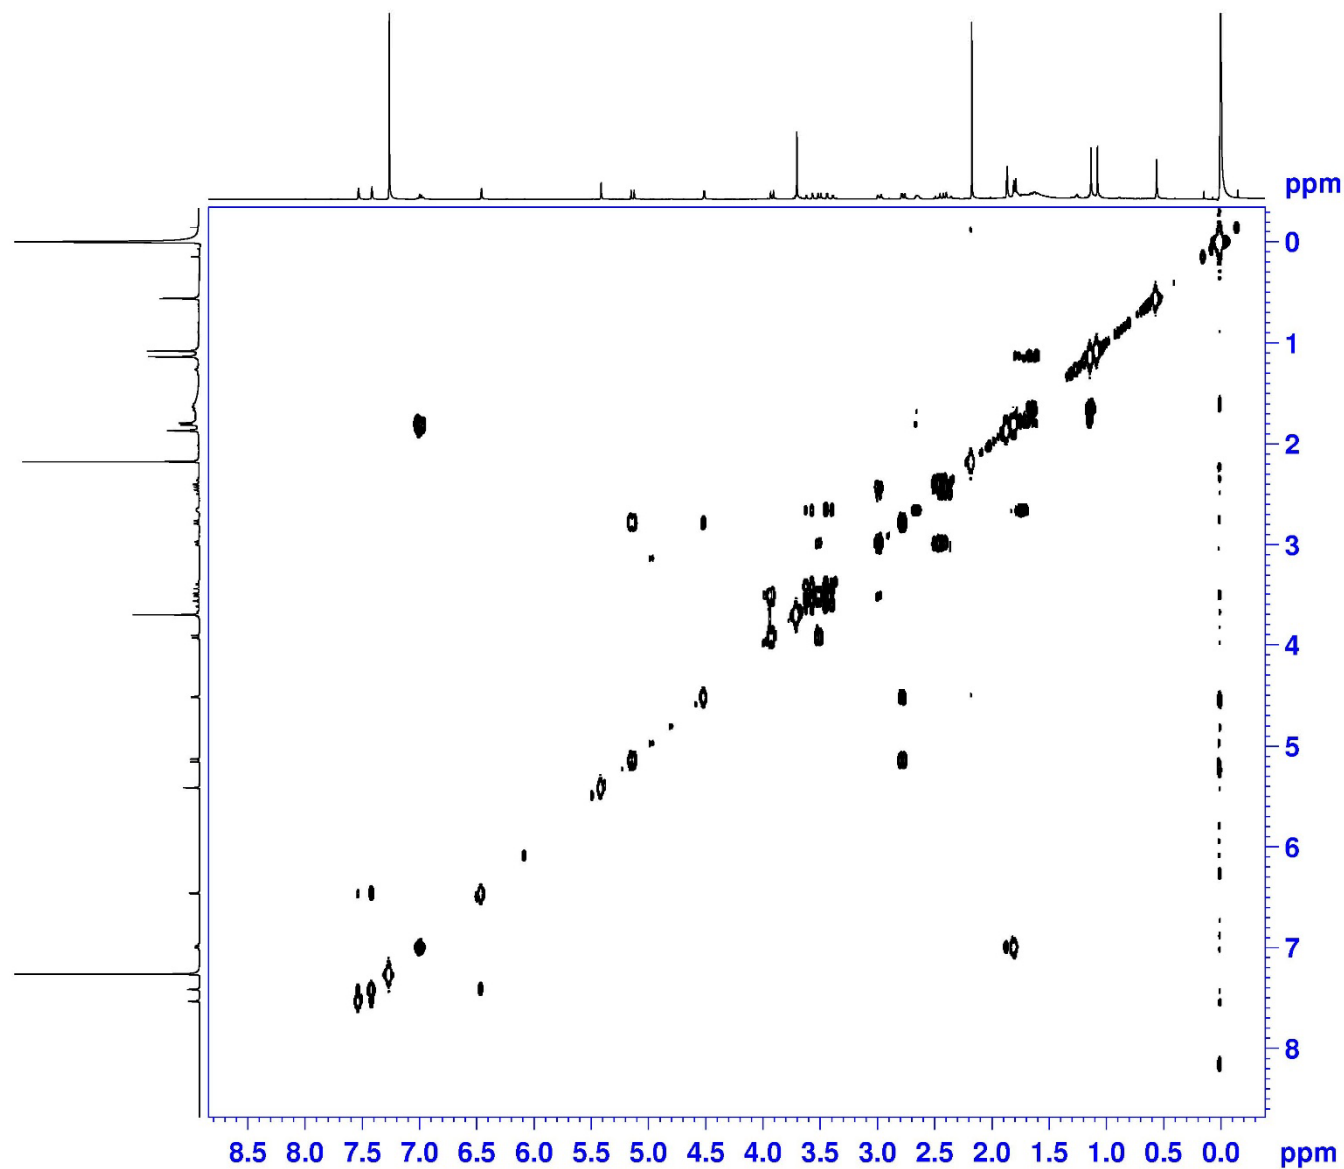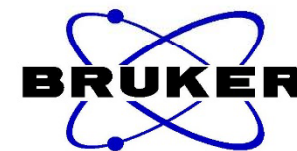

NAME ZXP-R-18-3-1-3-3 new  
EXPNO 4  
PROCNO 1  
Date\_ 20180122  
Time 23.49  
INSTRUM spect  
PROBHD 5 mm CPMBO BB  
PULPROG cosygpppgf  
TD 2048  
SOLVENT  $\text{CDCl}_3$   
NS 8  
DS 8  
SWH 3906.250 Hz  
FIDRES 1.907349 Hz  
AQ 0.2621940 sec  
RG 208.5  
DW 128.000 usec  
DE 10.00 usec  
TE 297.0 K  
D0 0.00000300 sec  
D1 1.89678097 sec  
D11 0.03000000 sec  
D12 0.00002000 sec  
D13 0.00000400 sec  
D16 0.00020000 sec  
IN0 0.00025600 sec

===== CHANNEL f1 =====  
SFO1 400.1318006 MHz  
NUC1  $^1\text{H}$   
P0 11.50 usec  
P1 11.50 usec  
P17 2500.00 usec  
ND0 1  
TD 128  
SFO1 400.1318 MHz  
FIDRES 30.517578 Hz  
SW 9.762 ppm  
FnMODE QF  
SI 1024  
SF 400.1300064 MHz  
WDW QSINE  
SSB 0  
LB 0.00 Hz  
GB 0  
PC 1.40  
SI 1024  
MC2 QF  
SF 400.1300071 MHz  
WDW QSINE  
SSB 0  
LB 0.00 Hz

$^1\text{H}$ - $^1\text{H}$  COSY (400 MHz) spectrum of compound **3** in  $\text{CDCl}_3$

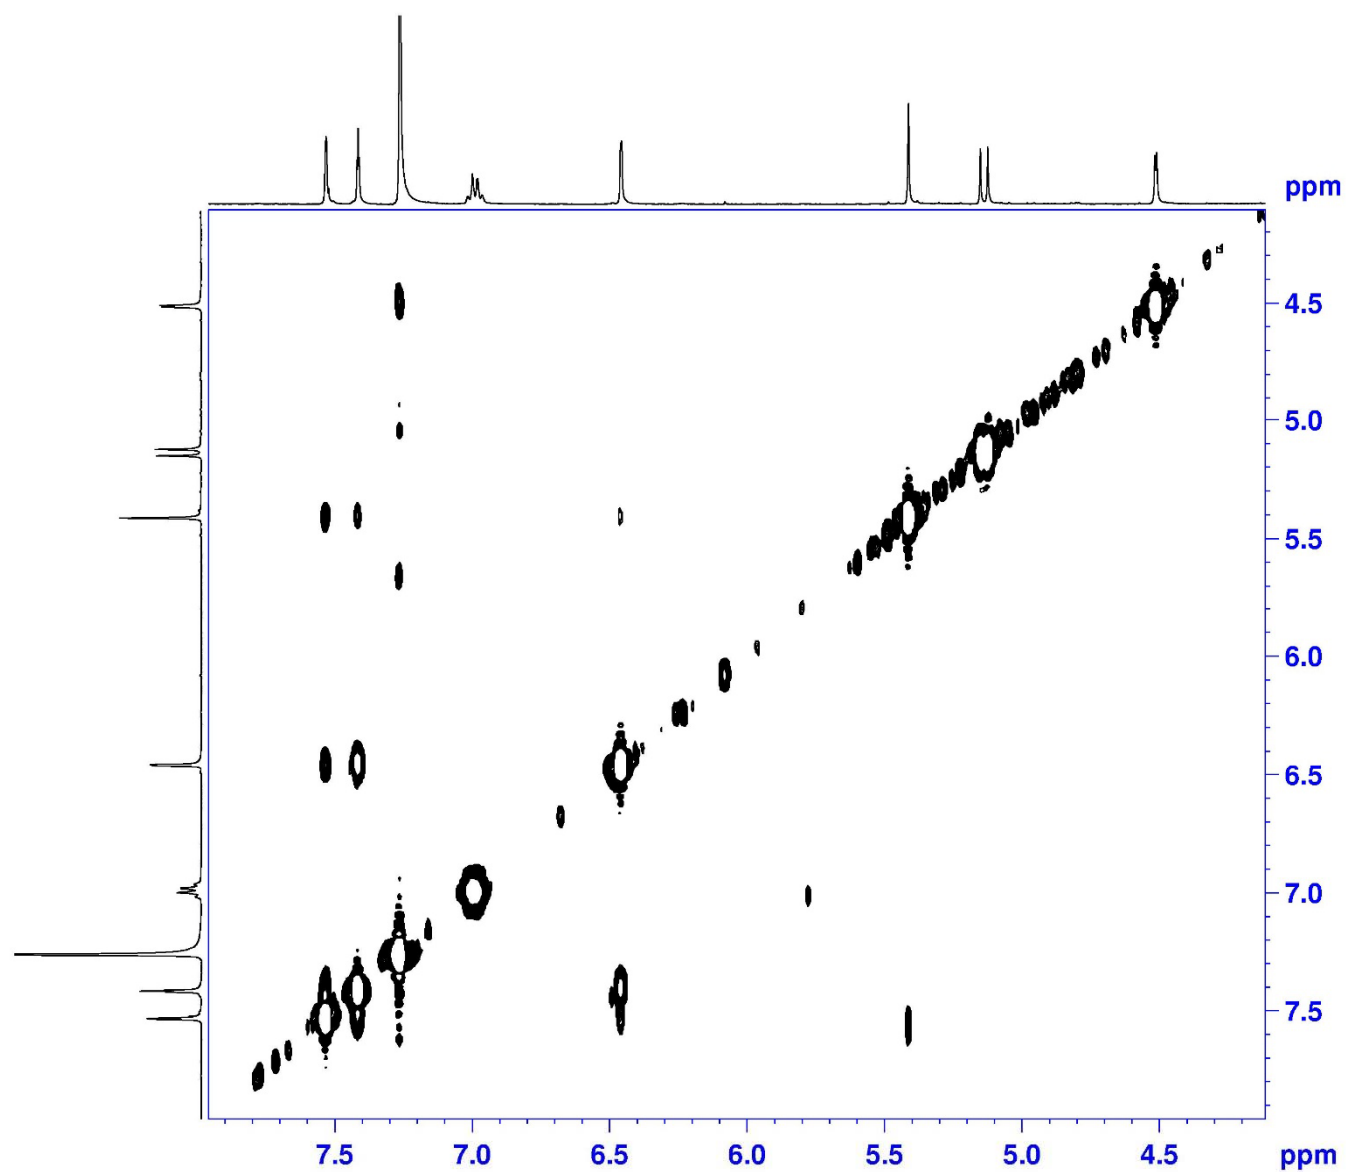

$^1\text{H}$ - $^1\text{H}$  COSY (400 MHz) spectrum of compound **3** in  $\text{CDCl}_3$

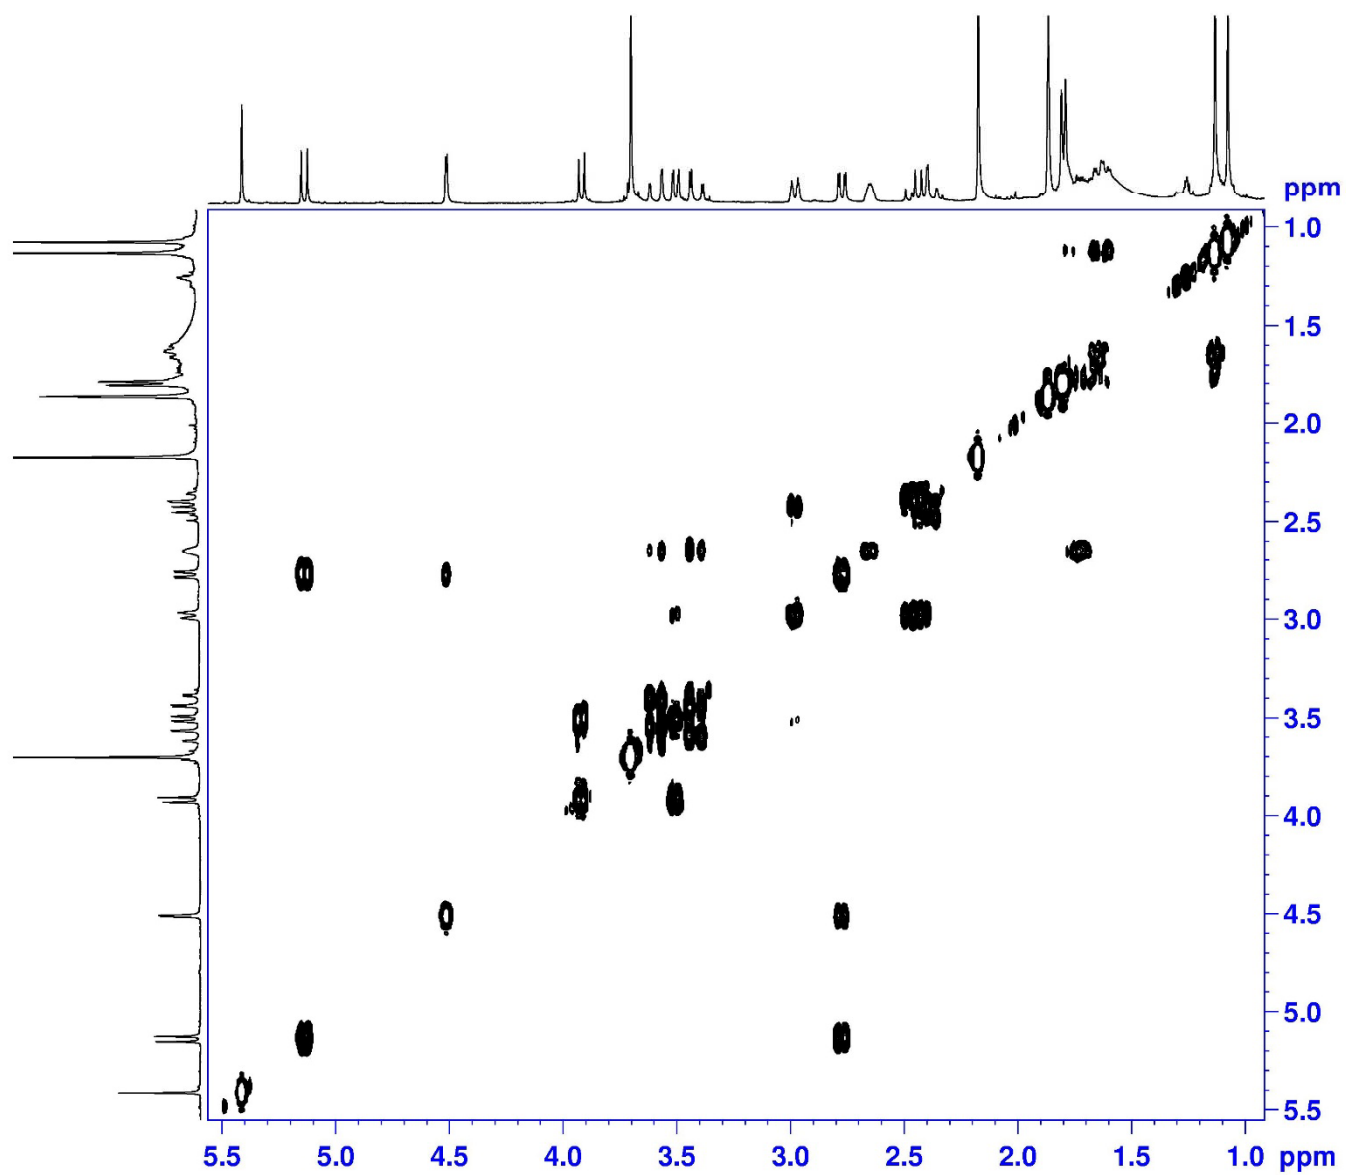



# HSQC (400 MHz) spectrum of compound **3** in CDCl<sub>3</sub>

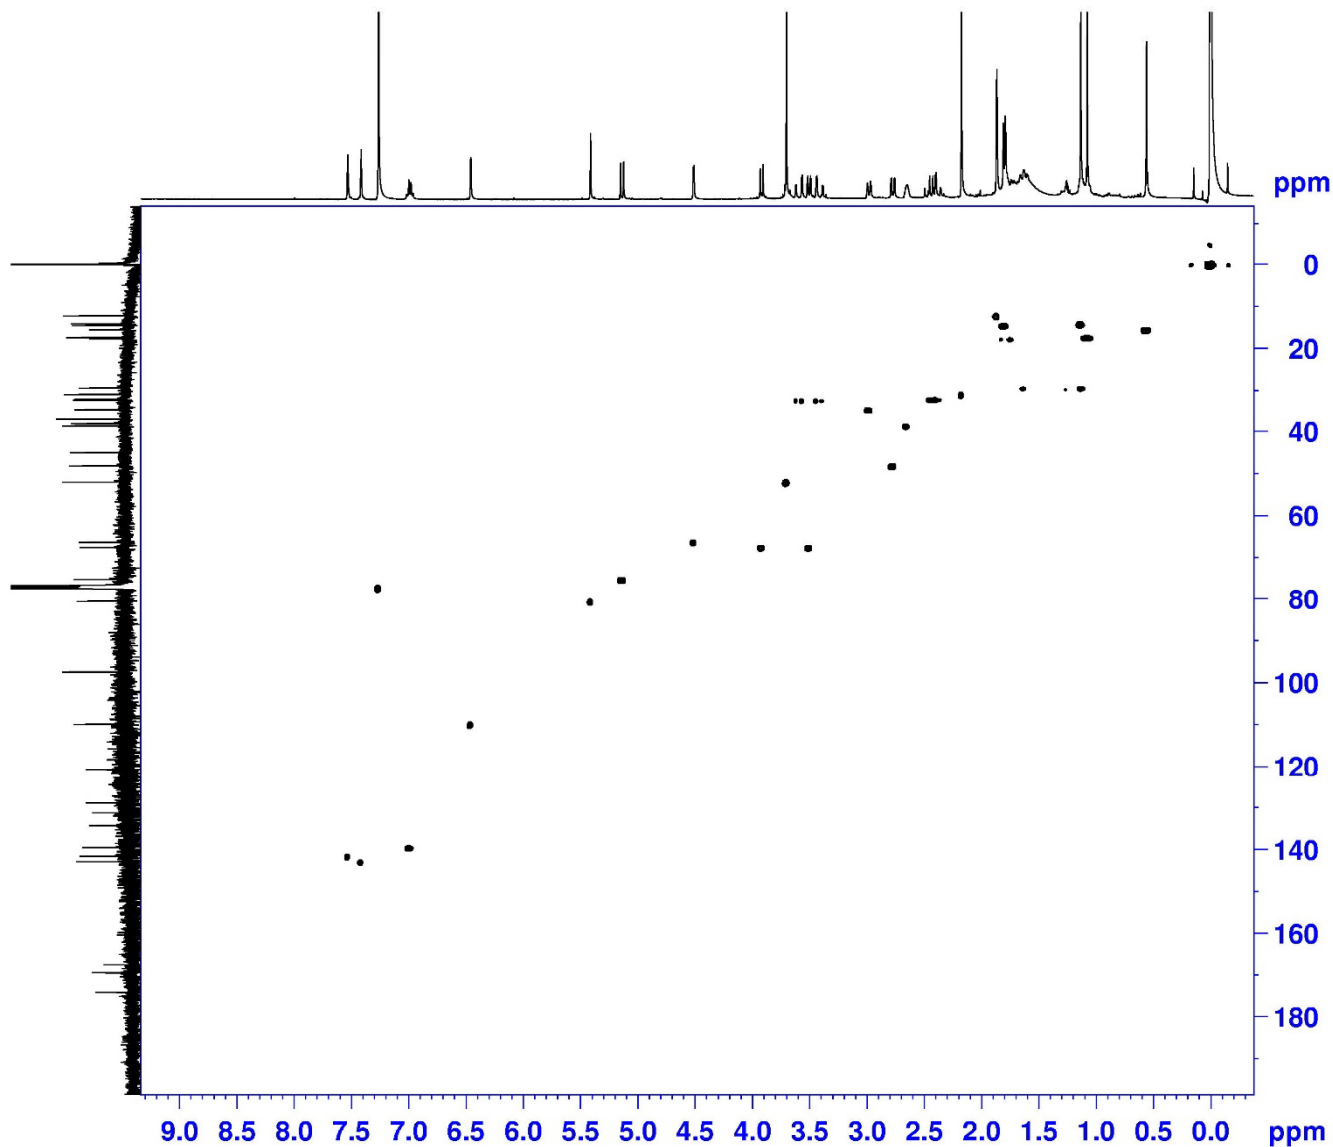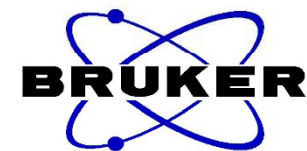

```

NAME      ZXP-R-18-3-1-3-3 new
EXPNO     5
PROCNO    1
Date_     20180123
Time      0.28
INSTRUM    spect
PROBHD     5 mm CPPBBO BB
PULPROG    hsqcetgpsi2
TD         1024
SOLVENT    CDCl3
NS         16
DS         16
SWH        4302.926 Hz
FIDRES     4.202076 Hz
AQ         0.1190388 sec
RG         208.5
DW         116.200 usec
DE         10.00 usec
TE         297.0 K
CNST2      145.0000000
D0         0.00000300 sec
D1         1.46497905 sec
D4         0.00172414 sec
D11        0.03000000 sec
D16        0.00020000 sec
D24        0.00086207 sec
IN0        0.00002080 sec
ZGPTNS
  
```

```

===== CHANNEL f1 =====
SFO1      400.1320007 MHz
NUC1       1H
P1         11.50 usec
P2         23.00 usec
P28        0.00 usec
ND0        2
TD         256
SFO1      100.6233 MHz
FIDRES     93.900238 Hz
SW         238.896 ppm
FnMODE     Echo-Antiecho
SI         1024
SF         400.1300055 MHz
WDW        QSINE
SSB        2
LB         0.00 Hz
GB         0
PC         1.40
SI         1024
MC2        echo-antiecho
SF         100.6127548 MHz
WDW        QSINE
SSB        2
LB         0.00 Hz
  
```

HSQC (400 MHz) spectrum of compound **3** in CDCl<sub>3</sub>

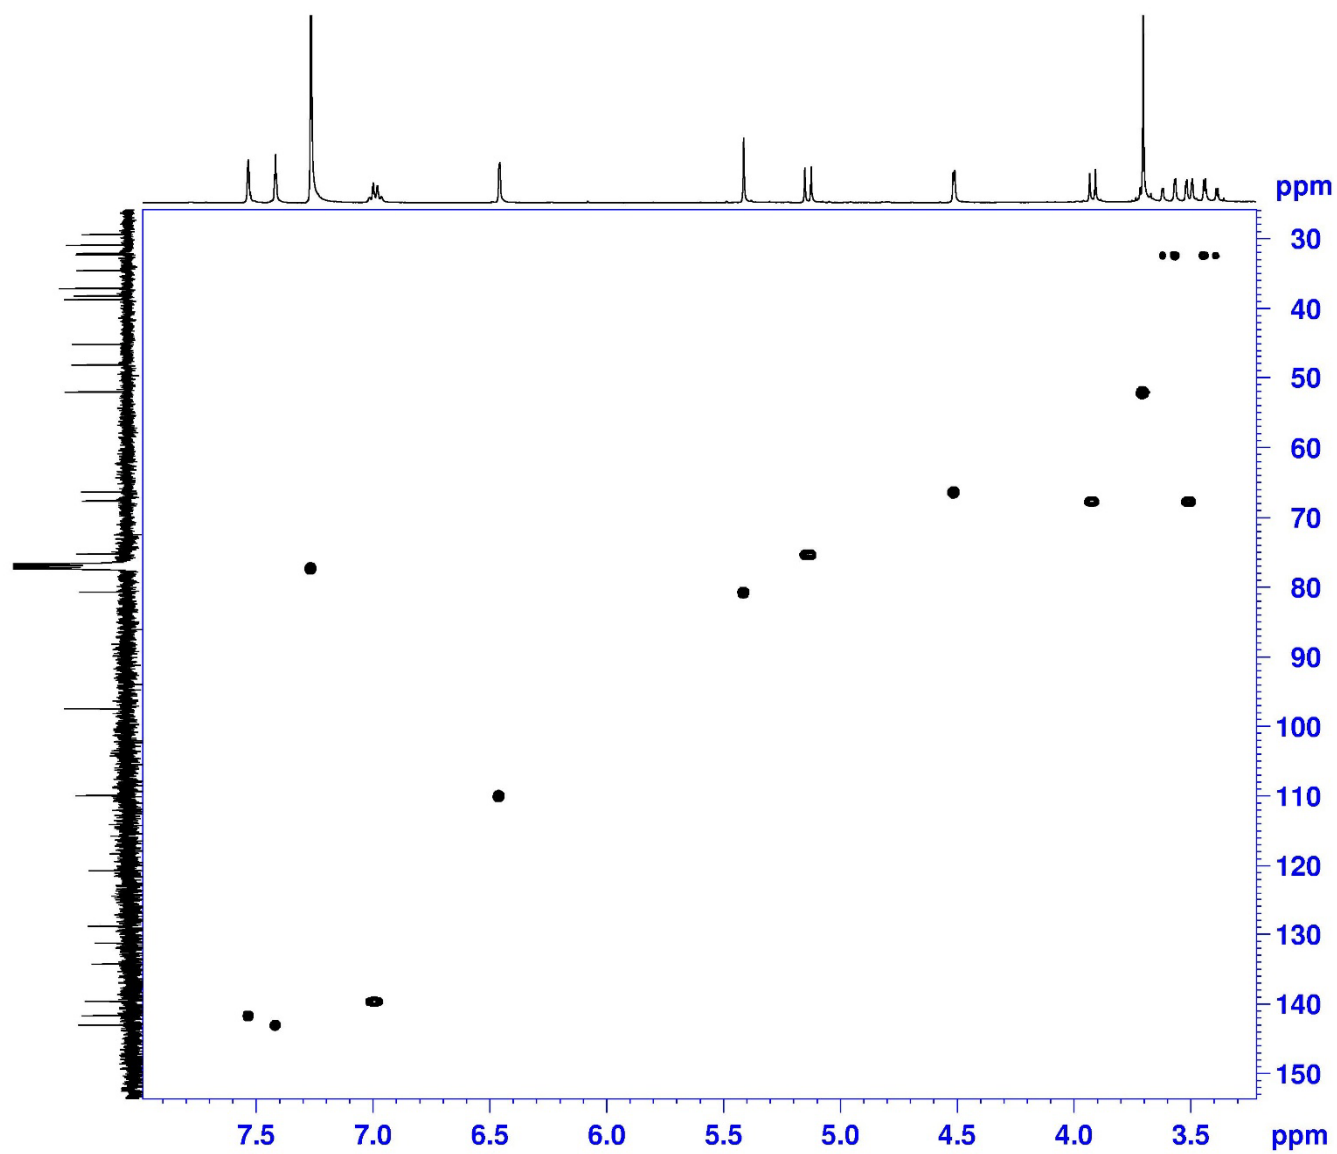

HSQC (400 MHz) spectrum of compound **3** in CDCl<sub>3</sub>

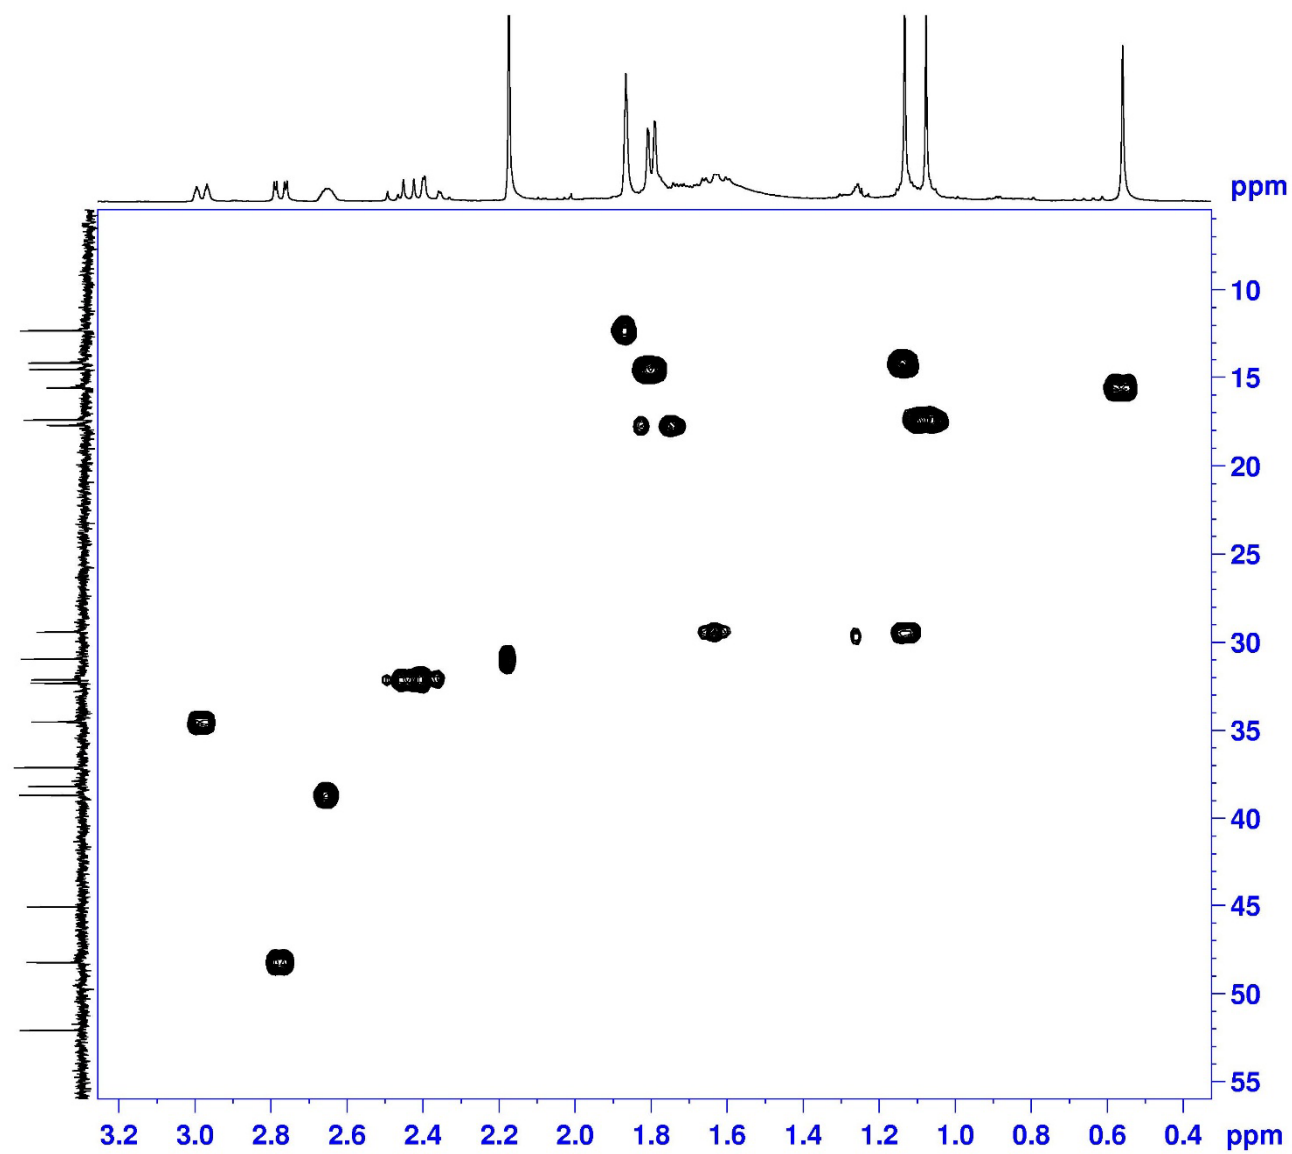

# HMBC (400 MHz) spectrum of compound **3** in CDCl<sub>3</sub>

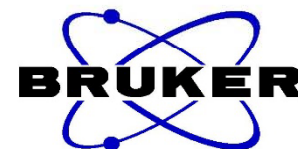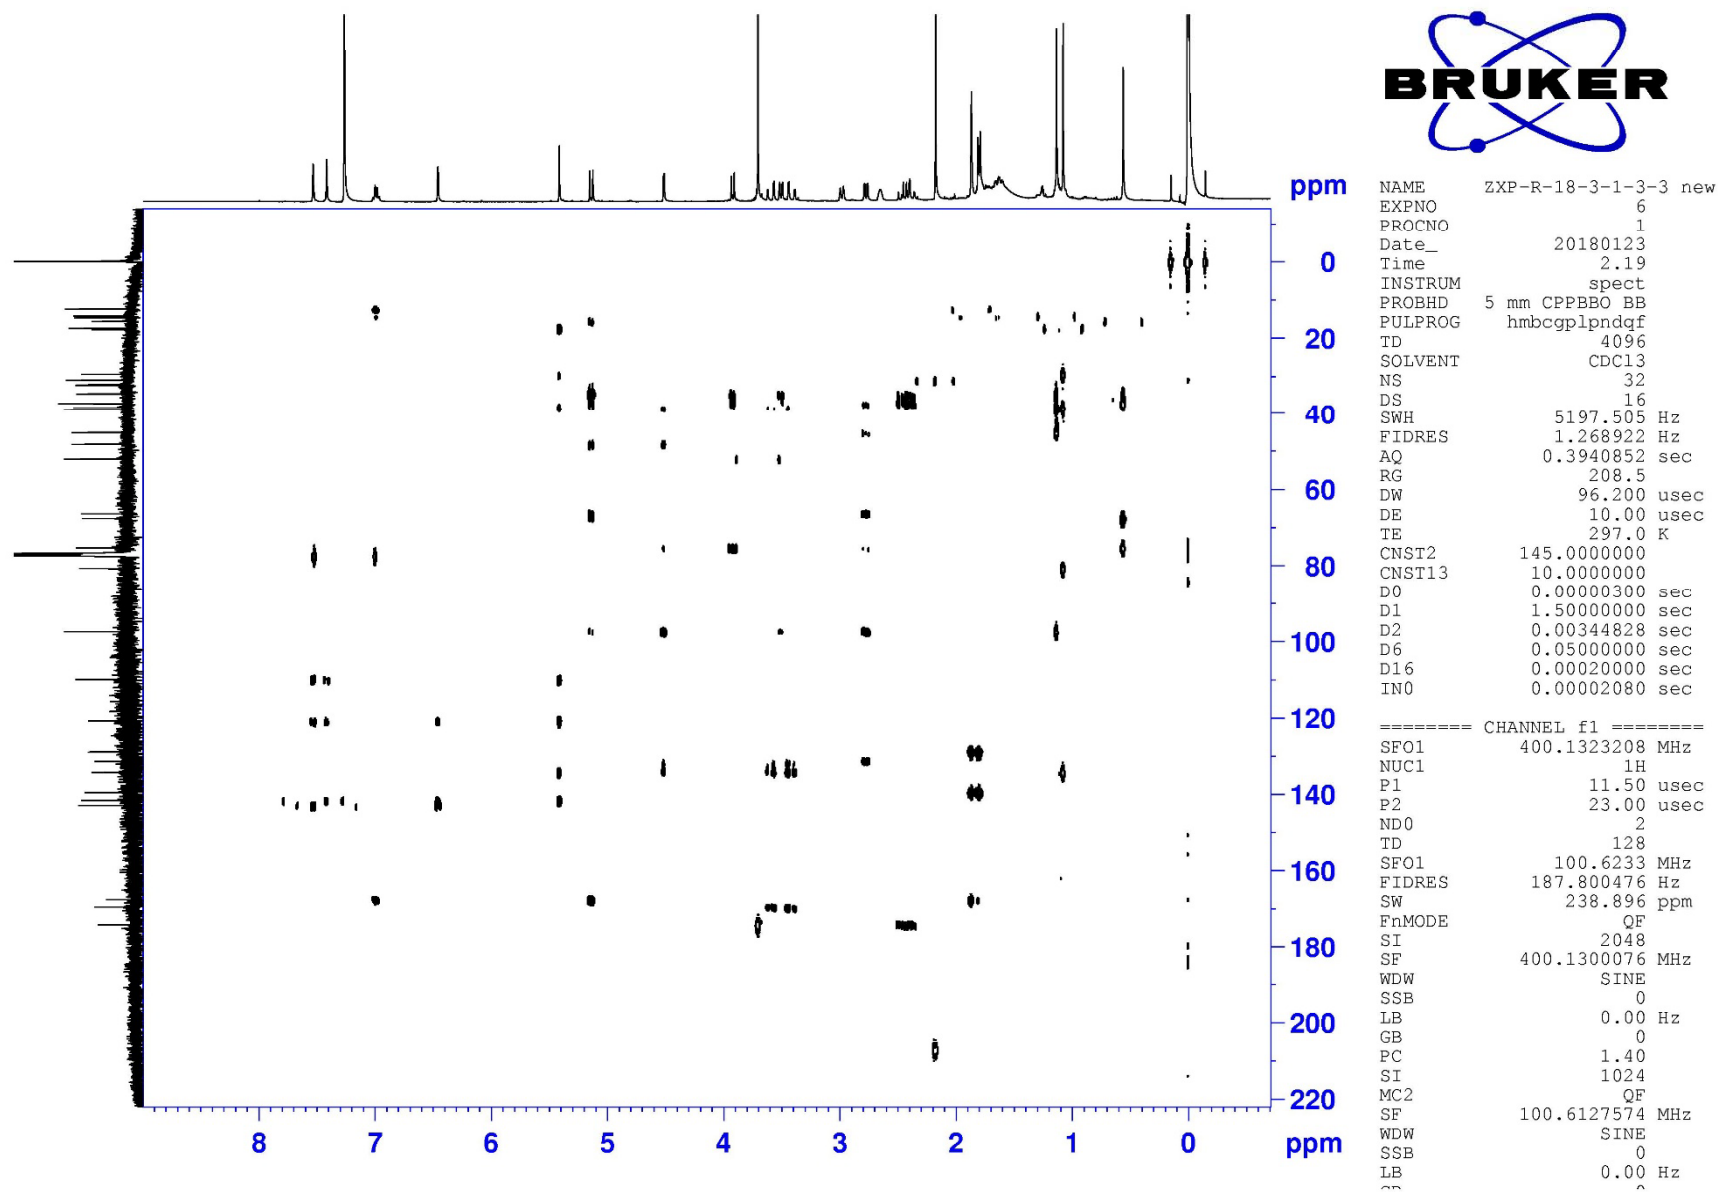

HMBC (400 MHz) spectrum of compound **3** in  $\text{CDCl}_3$

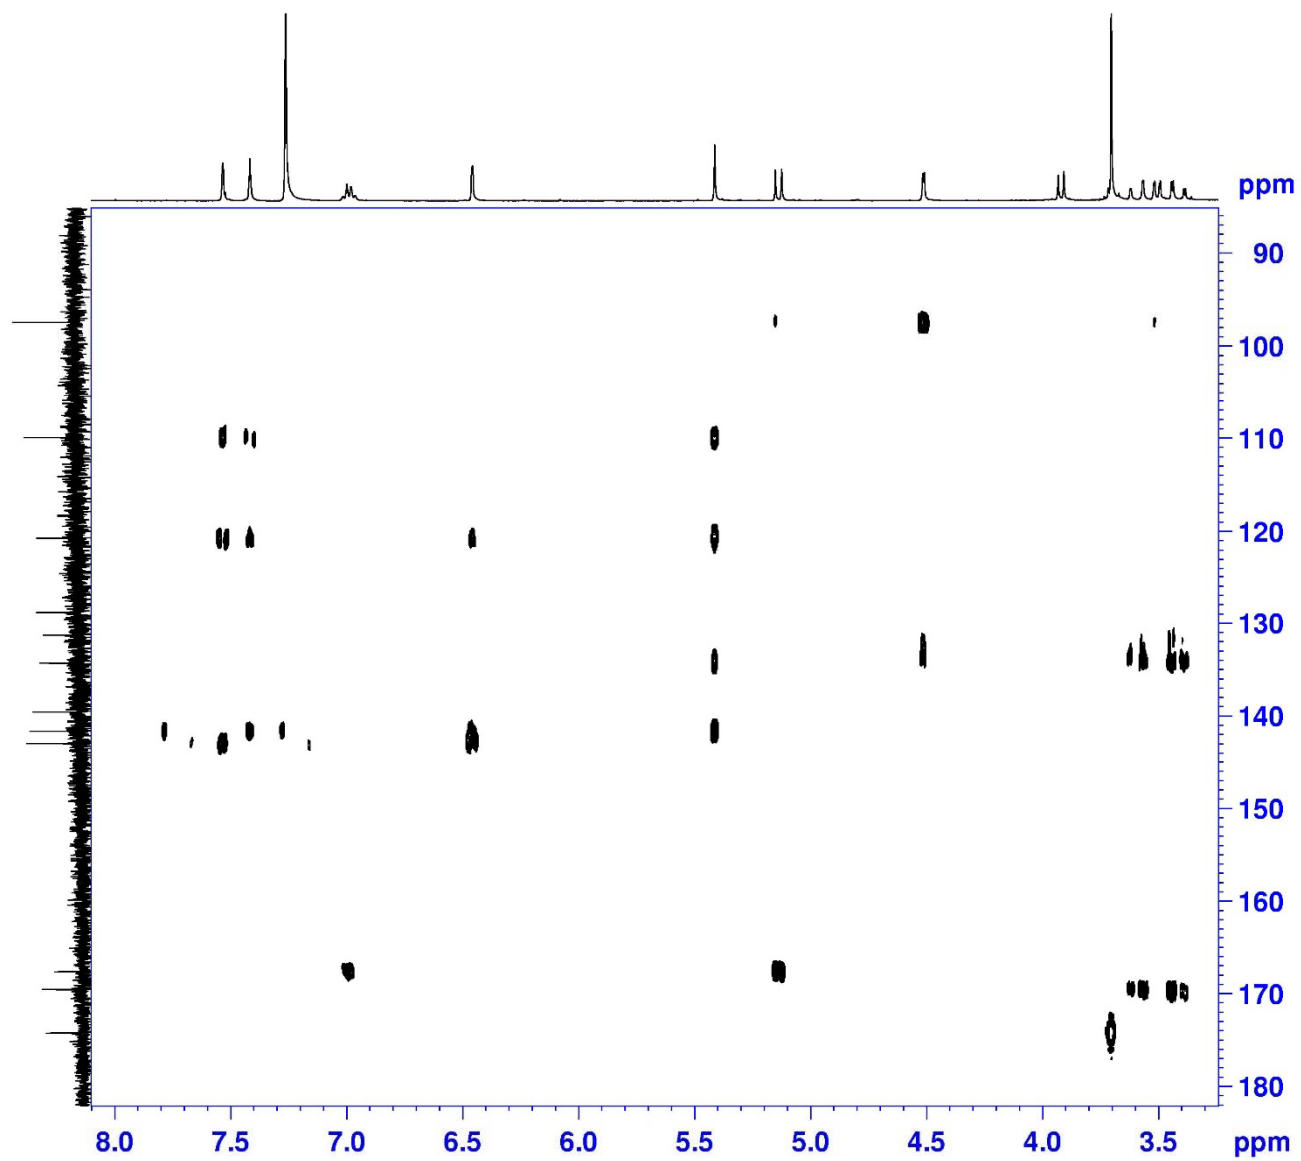

HMBC (400 MHz) spectrum of compound **3** in CDCl<sub>3</sub>

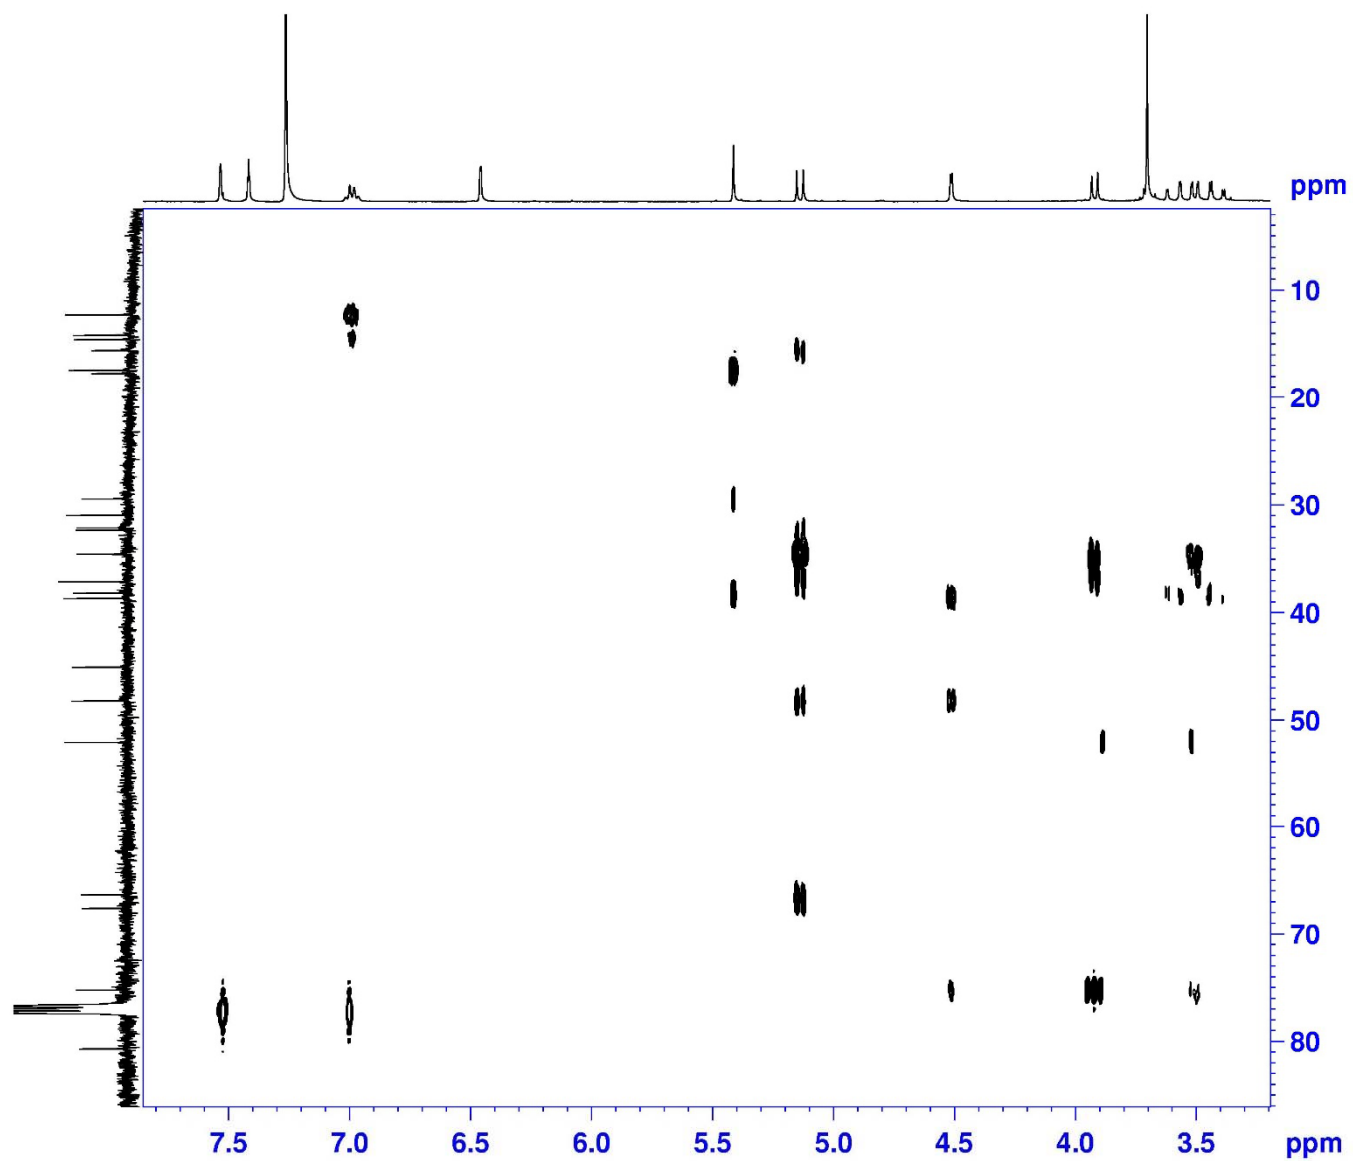

HMBC (400 MHz) spectrum of compound **3** in CDCl<sub>3</sub>

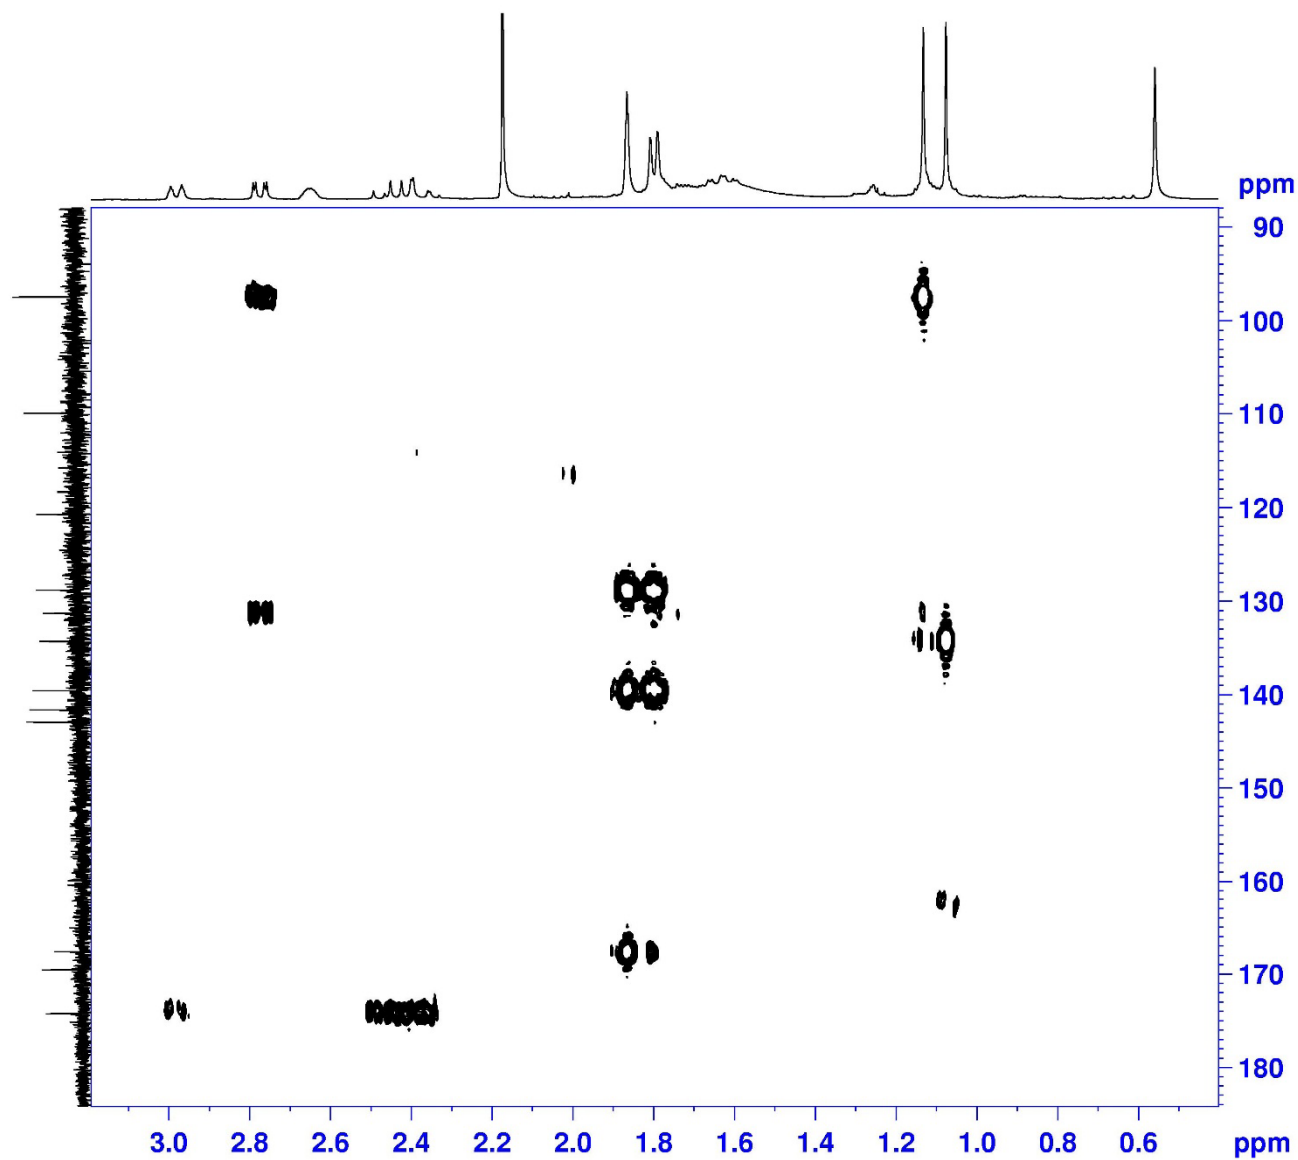

HMBC (400 MHz) spectrum of compound **3** in  $\text{CDCl}_3$

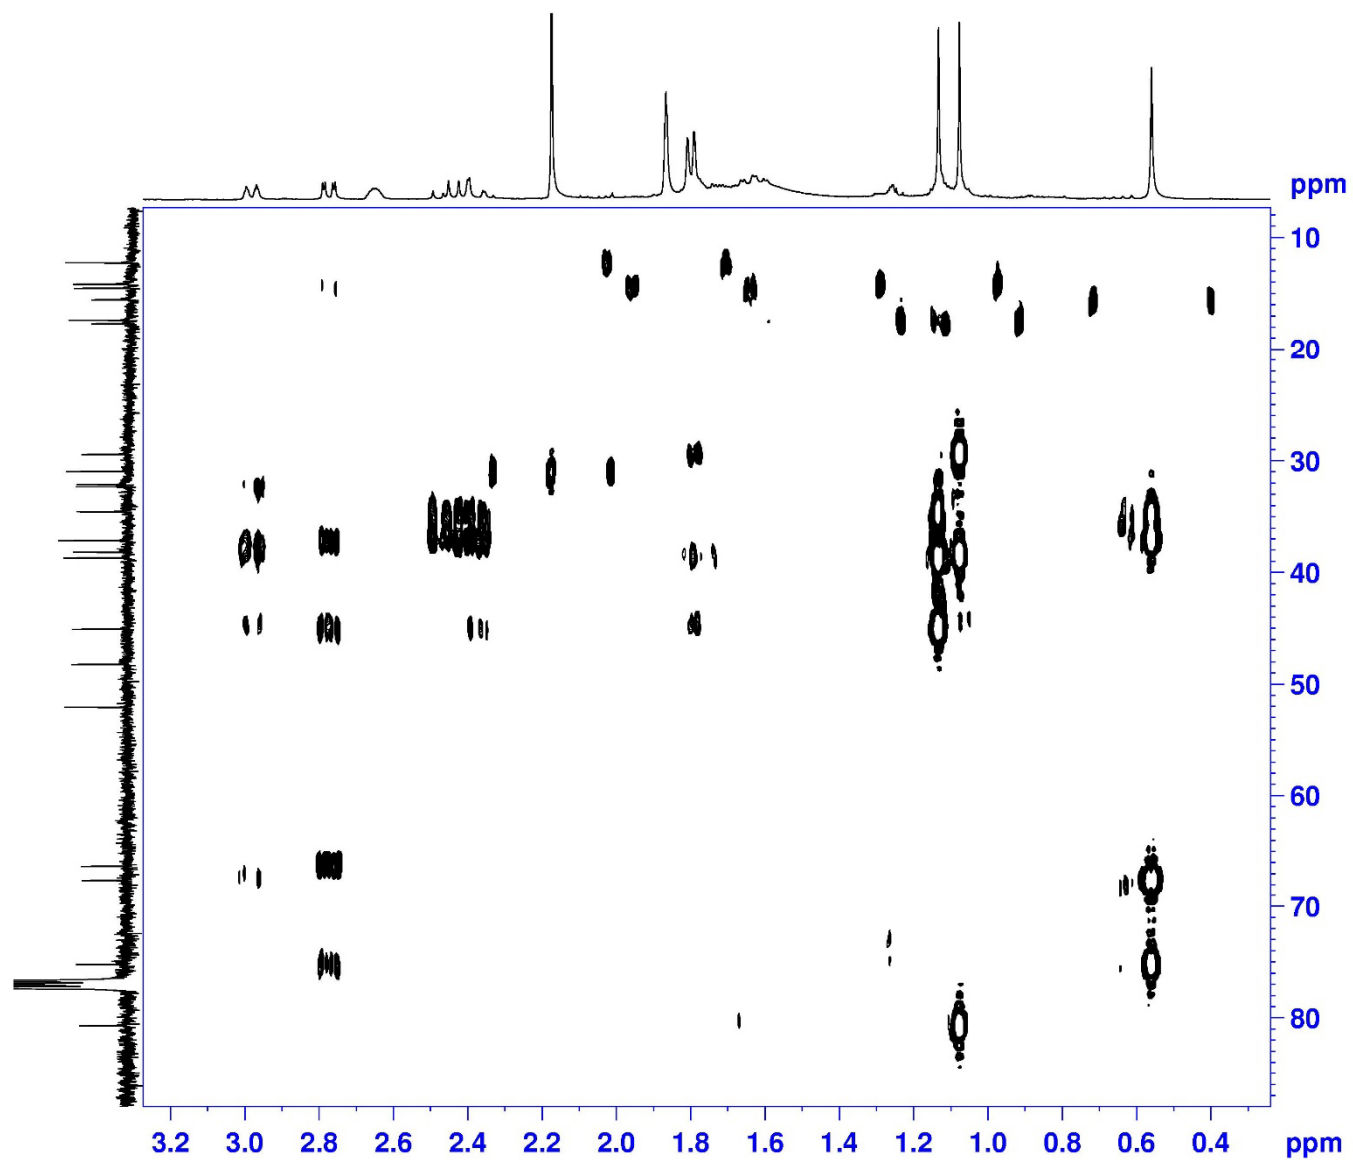



# NOESY (400 MHz) spectrum of compound **3** in CDCl<sub>3</sub>

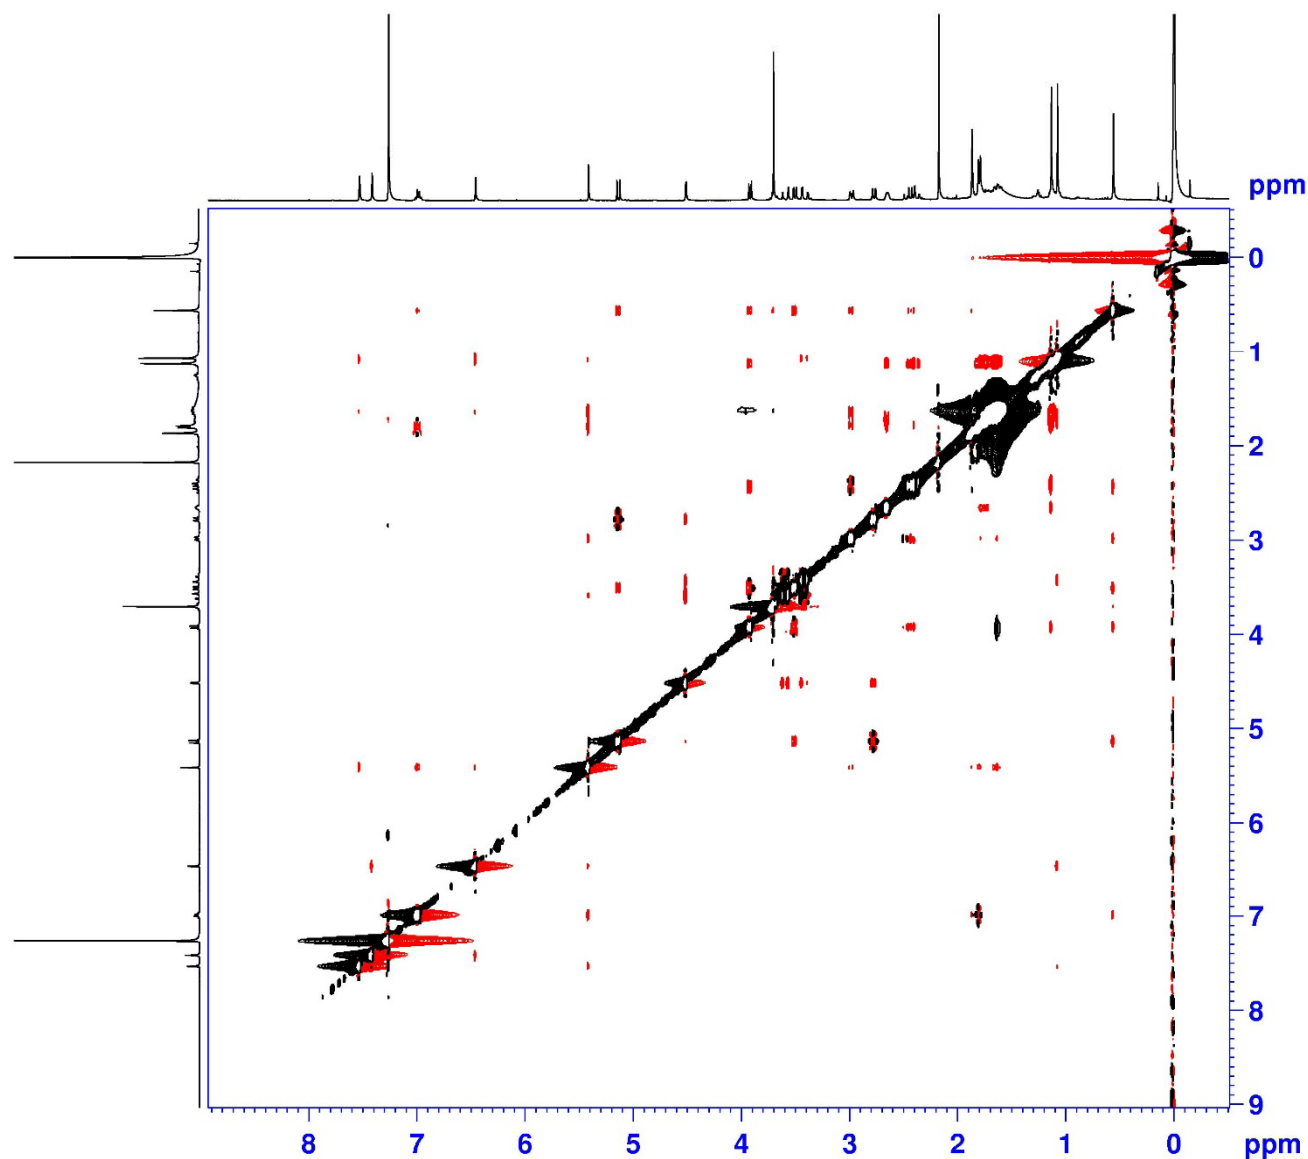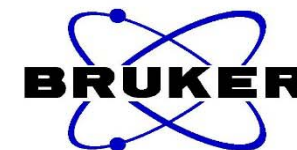

```
NAME      ZXP-R-18-3-1-3-3  new
EXPNO      7
PROCNO     1
Date_      20180123
Time       4.35
INSTRUM     spect
PROBHD      5 mm CPPBBO BB
PULPROG     noesygpphph
TD          2048
SOLVENT     CDCl3
NS          16
DS          32
SWH         4000.000 Hz
FIDRES      1.953125 Hz
AQ          0.2560500 sec
RG          208.5
DW          125.000 usec
DE          10.00 usec
TE          297.0 K
D0          0.00011036 sec
D1          1.99385595 sec
D8          0.30000001 sec
D11         0.03000000 sec
D12         0.00002000 sec
D16         0.00020000 sec
IN0         0.00025000 sec
```

```
===== CHANNEL f1 =====
SFO1      400.1318006 MHz
NUC1       1H
P1         11.50 usec
P2         23.00 usec
P17        2500.00 usec
ND0        1
TD         256
SFO1      400.1318 MHz
FIDRES     15.625000 Hz
SW         9.997 ppm
FnMODE     States-TPPI
SI         1024
SF         400.1300062 MHz
WDW        QSINE
SSB        2
LB         0.00 Hz
GB         0
PC         1.00
SI         1024
MC2        States-TPPI
SF         400.1300070 MHz
WDW        QSINE
SSB        2
LB         0.00 Hz
GB         0
```

NOESY (400 MHz) spectrum of compound **3** in  $\text{CDCl}_3$

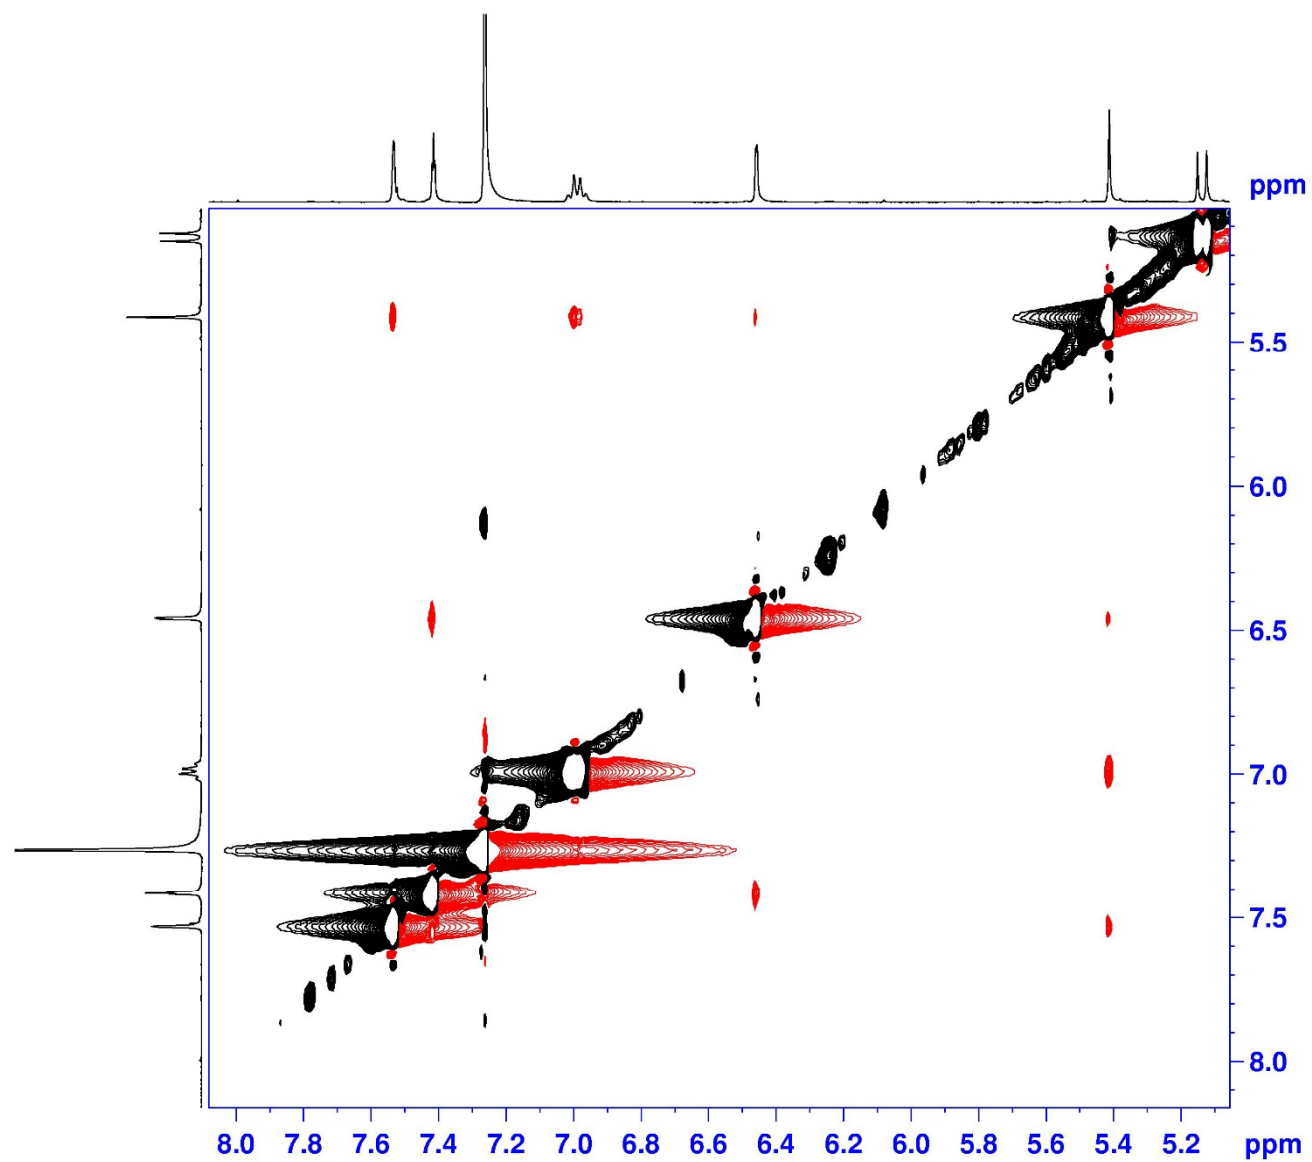

NOESY (400 MHz) spectrum of compound **3** in CDCl<sub>3</sub>

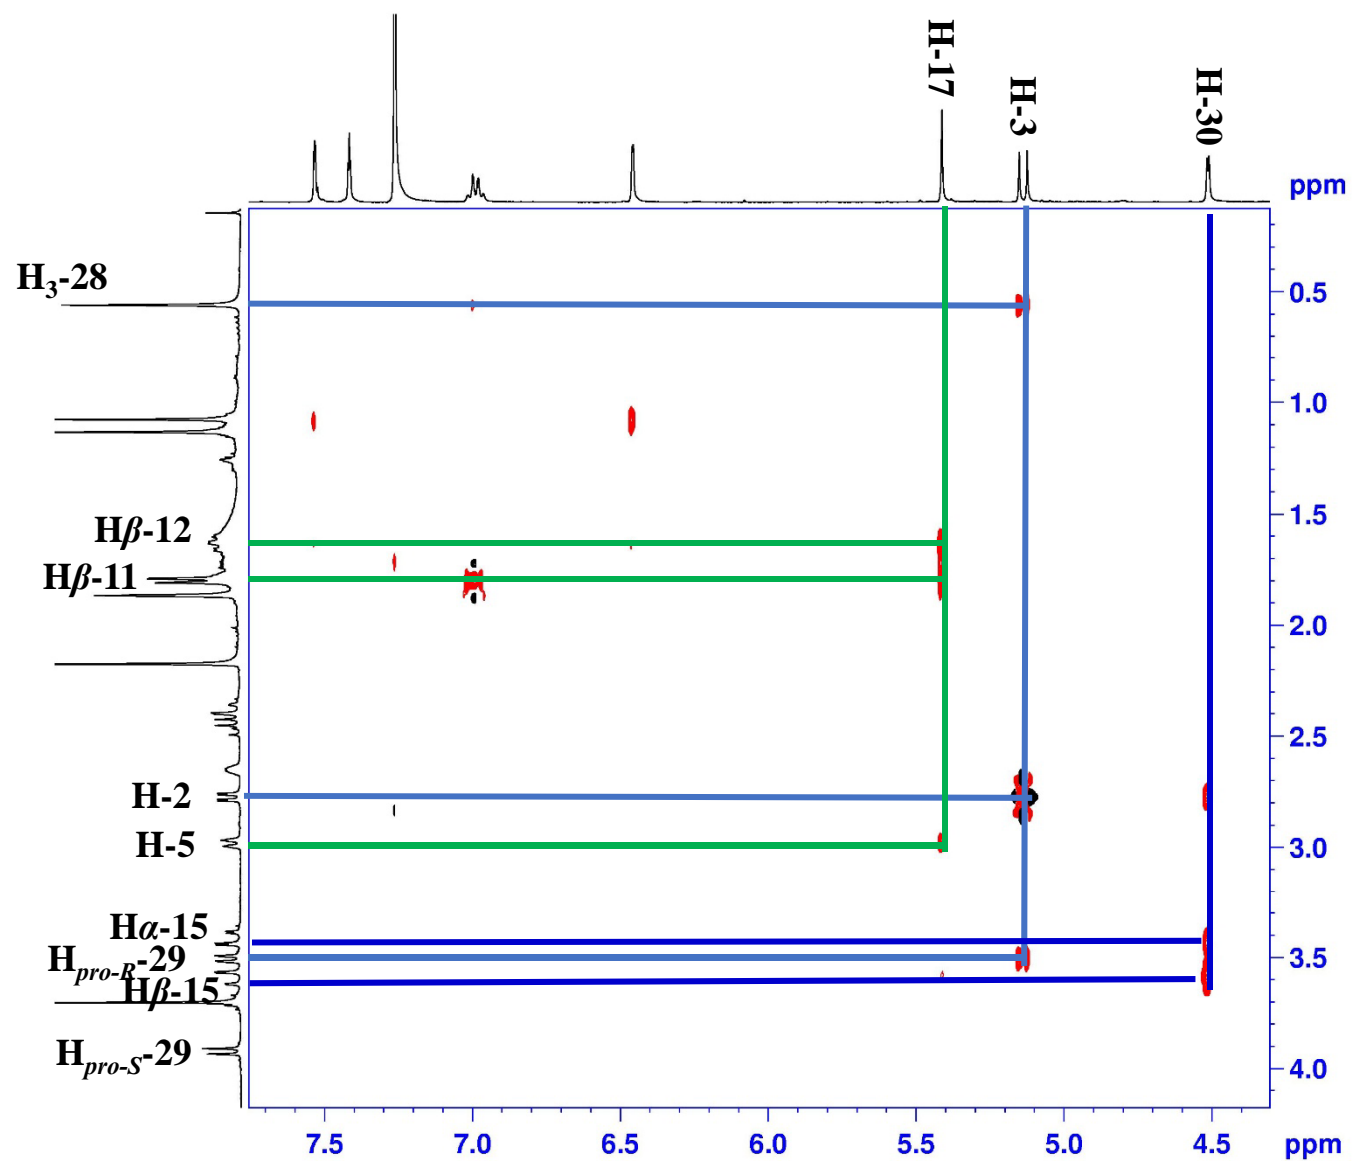

NOESY (400 MHz) spectrum of compound **3** in  $\text{CDCl}_3$

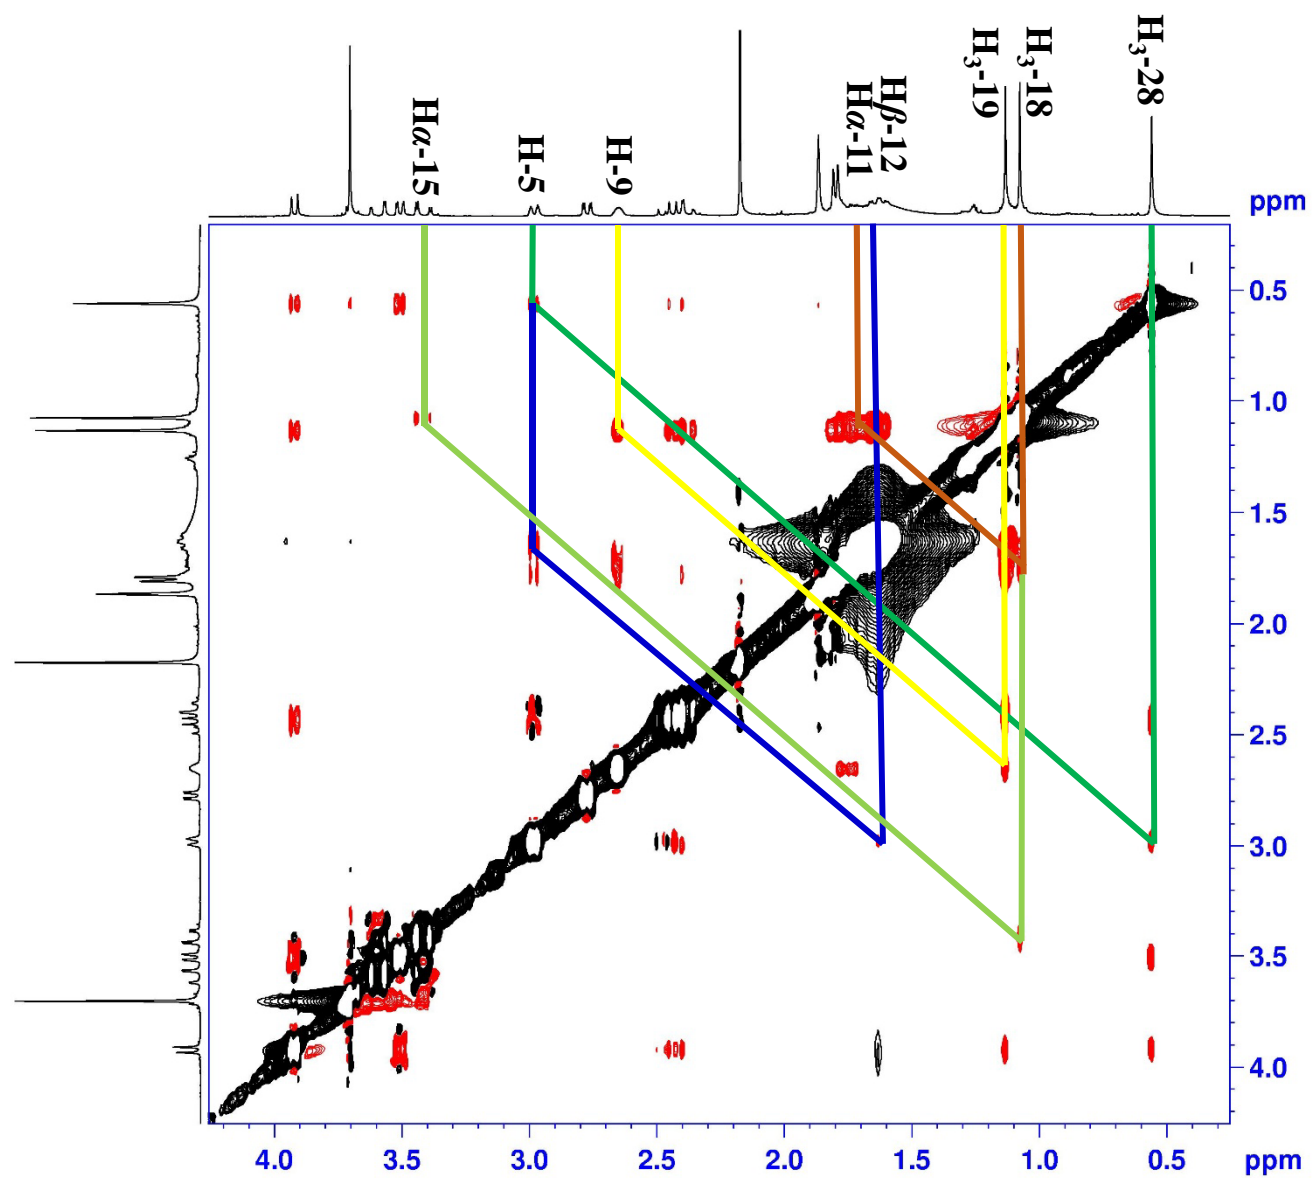

# HR-ESIMS for compound 4

## Generic Display Report

### Analysis Info

Analysis Name D:\Data\MS\data\201809\zhouxiaopeng\_ZXP-1\_pos\_3\_01\_5425.d  
Method LC\_Direct Infusion\_pos\_100-1000mz.m  
Sample Name zhouxiaopeng\_ZXP-1\_pos  
Comment

Acquisition Date 9/7/2018 4:58:32 PM

Operator SCSIO  
Instrument maXis

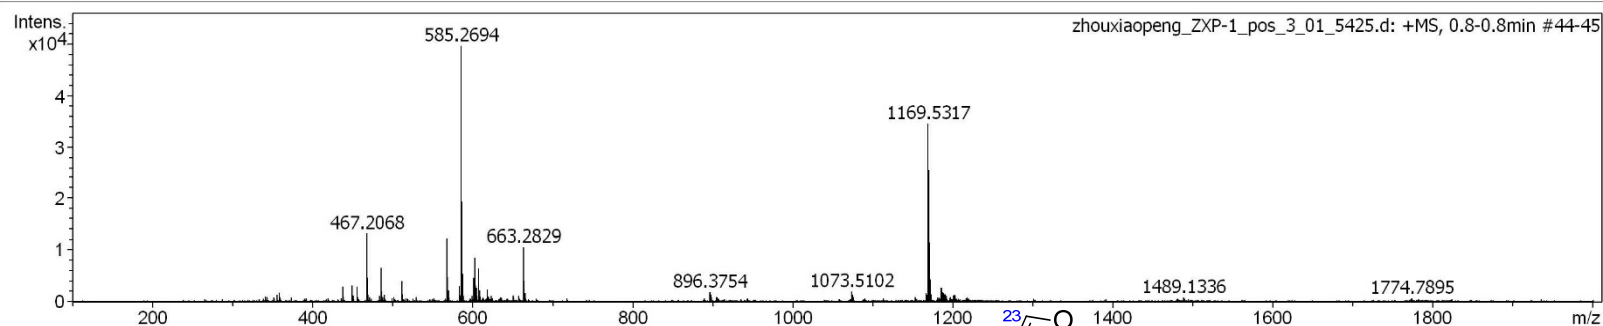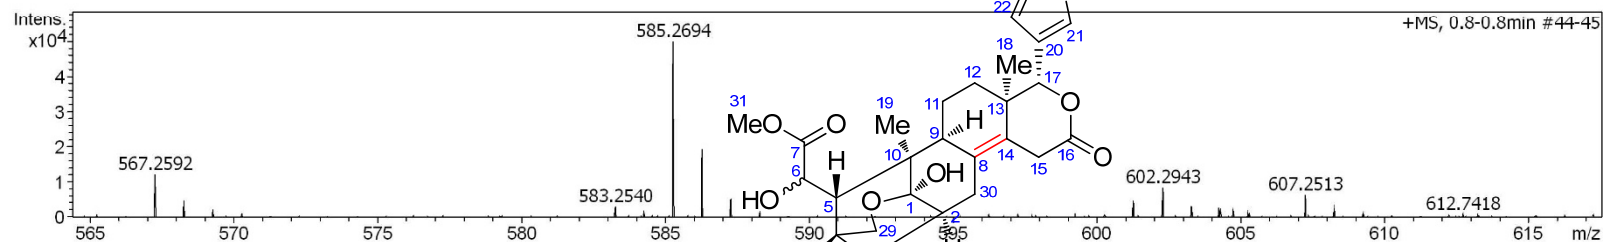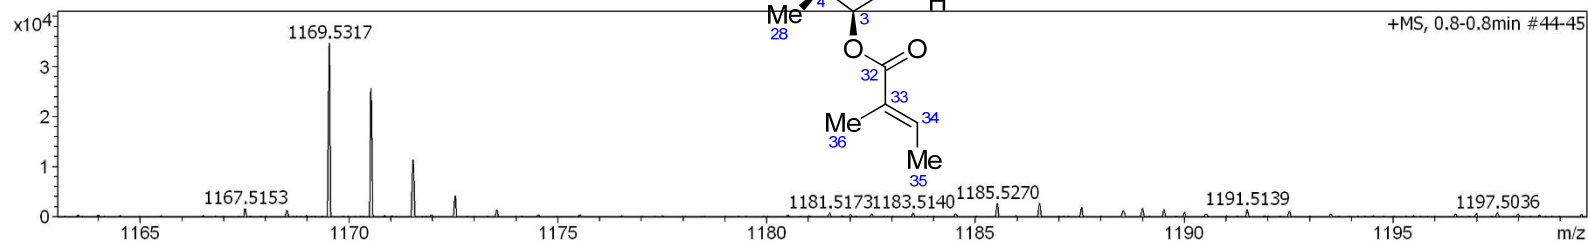

# HR-ESIMS for compound 4

## Mass Spectrum SmartFormula Report

### Analysis Info

Analysis Name D:\Data\MS\data\201809\zhouxiaopeng\_ZXP-1\_pos\_3\_01\_5425.d  
 Method LC\_Direct Infusion\_pos\_100-1000mz.m  
 Sample Name zhouxiaopeng\_ZXP-1\_pos  
 Comment

Acquisition Date 9/7/2018 4:58:32 PM  
 Operator SCSIO  
 Instrument maXis 255552.00029

### Acquisition Parameter

|             |          |                      |          |                  |           |
|-------------|----------|----------------------|----------|------------------|-----------|
| Source Type | ESI      | Ion Polarity         | Positive | Set Nebulizer    | 0.4 Bar   |
| Focus       | Active   | Set Capillary        | 4500 V   | Set Dry Heater   | 180 °C    |
| Scan Begin  | 100 m/z  | Set End Plate Offset | -500 V   | Set Dry Gas      | 4.0 l/min |
| Scan End    | 2000 m/z | Set Charging Voltage | 0 V      | Set Divert Valve | Waste     |
|             |          | Set Corona           | 0 nA     | Set APCI Heater  | 0 °C      |

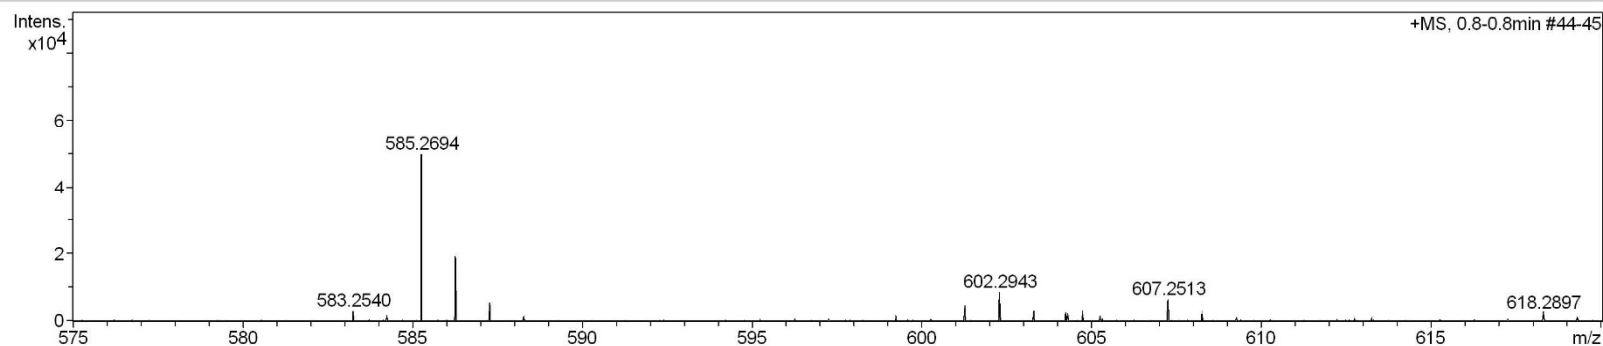

| Meas. m/z | # | Ion Formula | Score  | m/z       | err [ppm] | err [mDa] | mSigma | rdb  | e <sup>-</sup> Conf | N-Rule |
|-----------|---|-------------|--------|-----------|-----------|-----------|--------|------|---------------------|--------|
| 585.2694  | 1 | C32H41O10   | 100.00 | 585.2694  | -0.1      | -0.1      | 22.1   | 12.5 | even                | ok     |
| 607.2513  | 1 | C32H40NaO10 | 100.00 | 607.2514  | -0.1      | -0.0      | 38.7   | 12.5 | even                | ok     |
| 1169.5317 | 1 | C64H81O20   | 100.00 | 1169.5316 | -0.1      | -0.1      | 26.9   | 24.5 | even                | ok     |

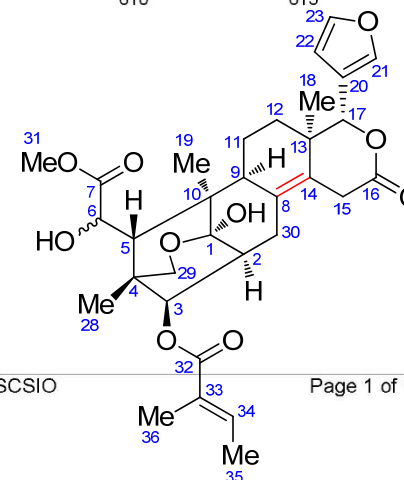

zhouxiaopeng\_ZXP-1\_pos\_3\_01\_5425.d  
 Bruker Compass DataAnalysis 4.1

printed: 9/7/2018 5:03:16 PM

by: SCSIO

Page 1 of 1

S88

<sup>1</sup>H NMR (400 MHz) spectrum of compound **4** in CDCl<sub>3</sub>

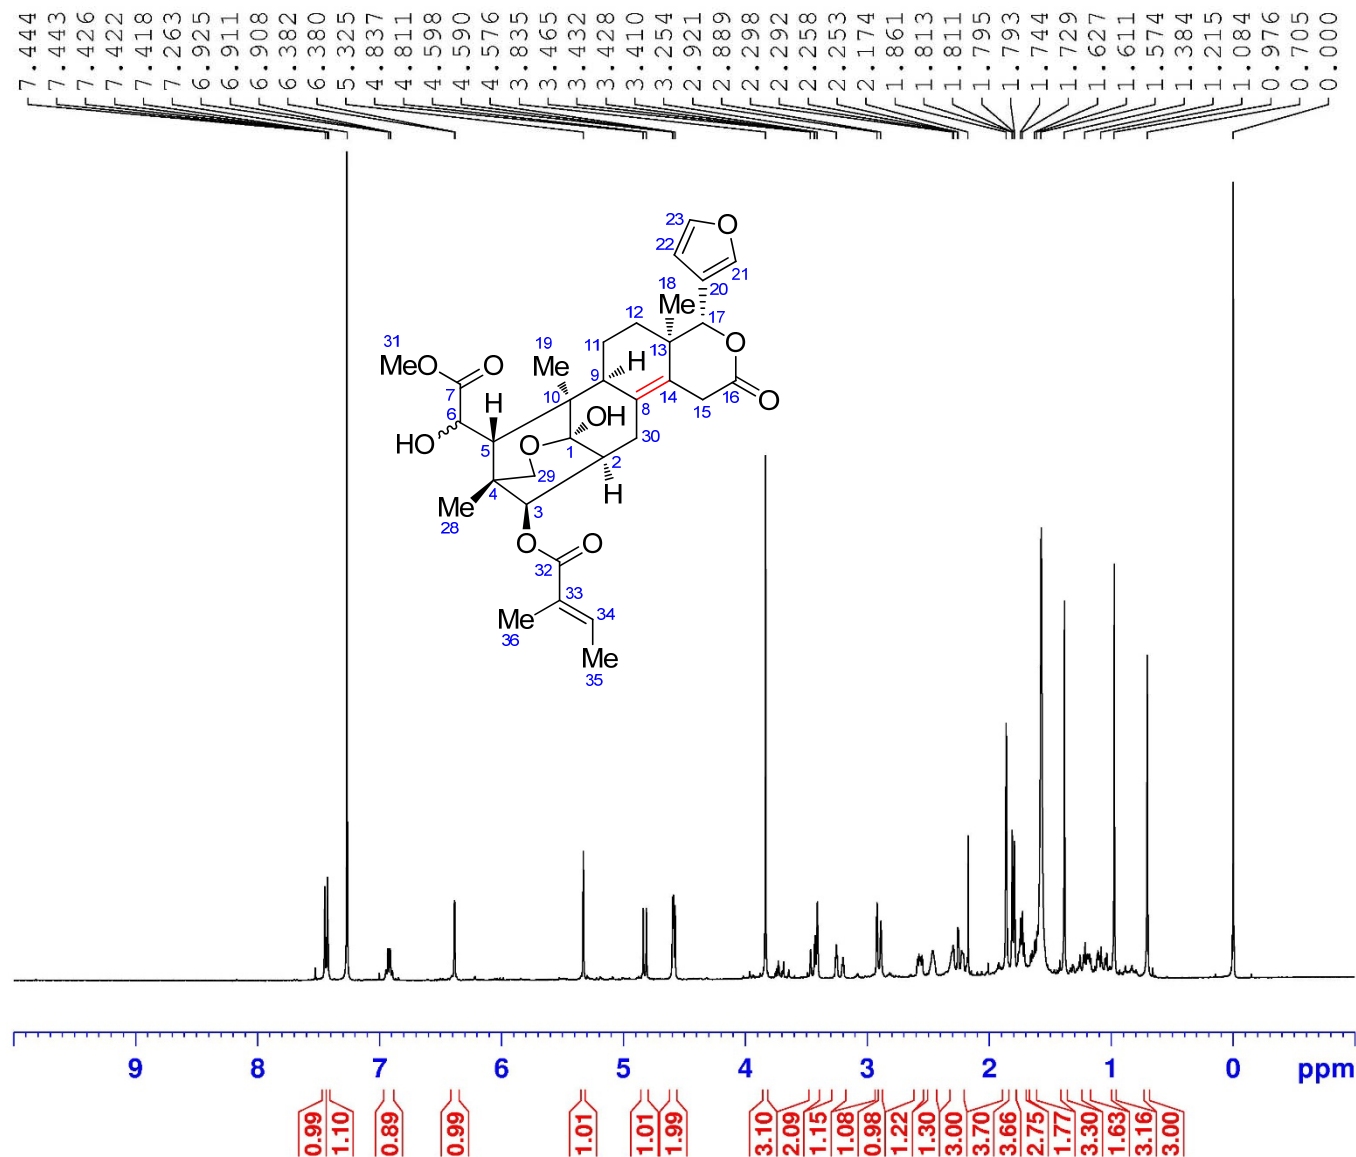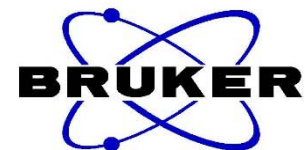

```

NAME      ZXP-R-17-2-1-2
EXPNO     1
PROCNO    1
Date_     20180704
Time      6.26
INSTRUM   spect
PROBHD    5 mm CPPBBO BB
PULPROG   zg30
TD        65536
SOLVENT   CDCl3
NS        16
DS        2
SWH       8223.685 Hz
FIDRES    0.125483 Hz
AQ        3.9846387 sec
RG        208.5
DW        60.800 usec
DE        10.00 usec
TE        297.0 K
D1        1.00000000 sec
TD0       1

===== CHANNEL f1 =====
SFO1      400.1324710 MHz
NUC1      1H
P1        11.50 usec
SI        65536
SF        400.1300088 MHz
WDW       EM
SSB       0
LB        0.30 Hz
GB        0
PC        1.00
    
```

$^1\text{H}$  NMR (400 MHz) spectrum of compound **4** in  $\text{CDCl}_3$

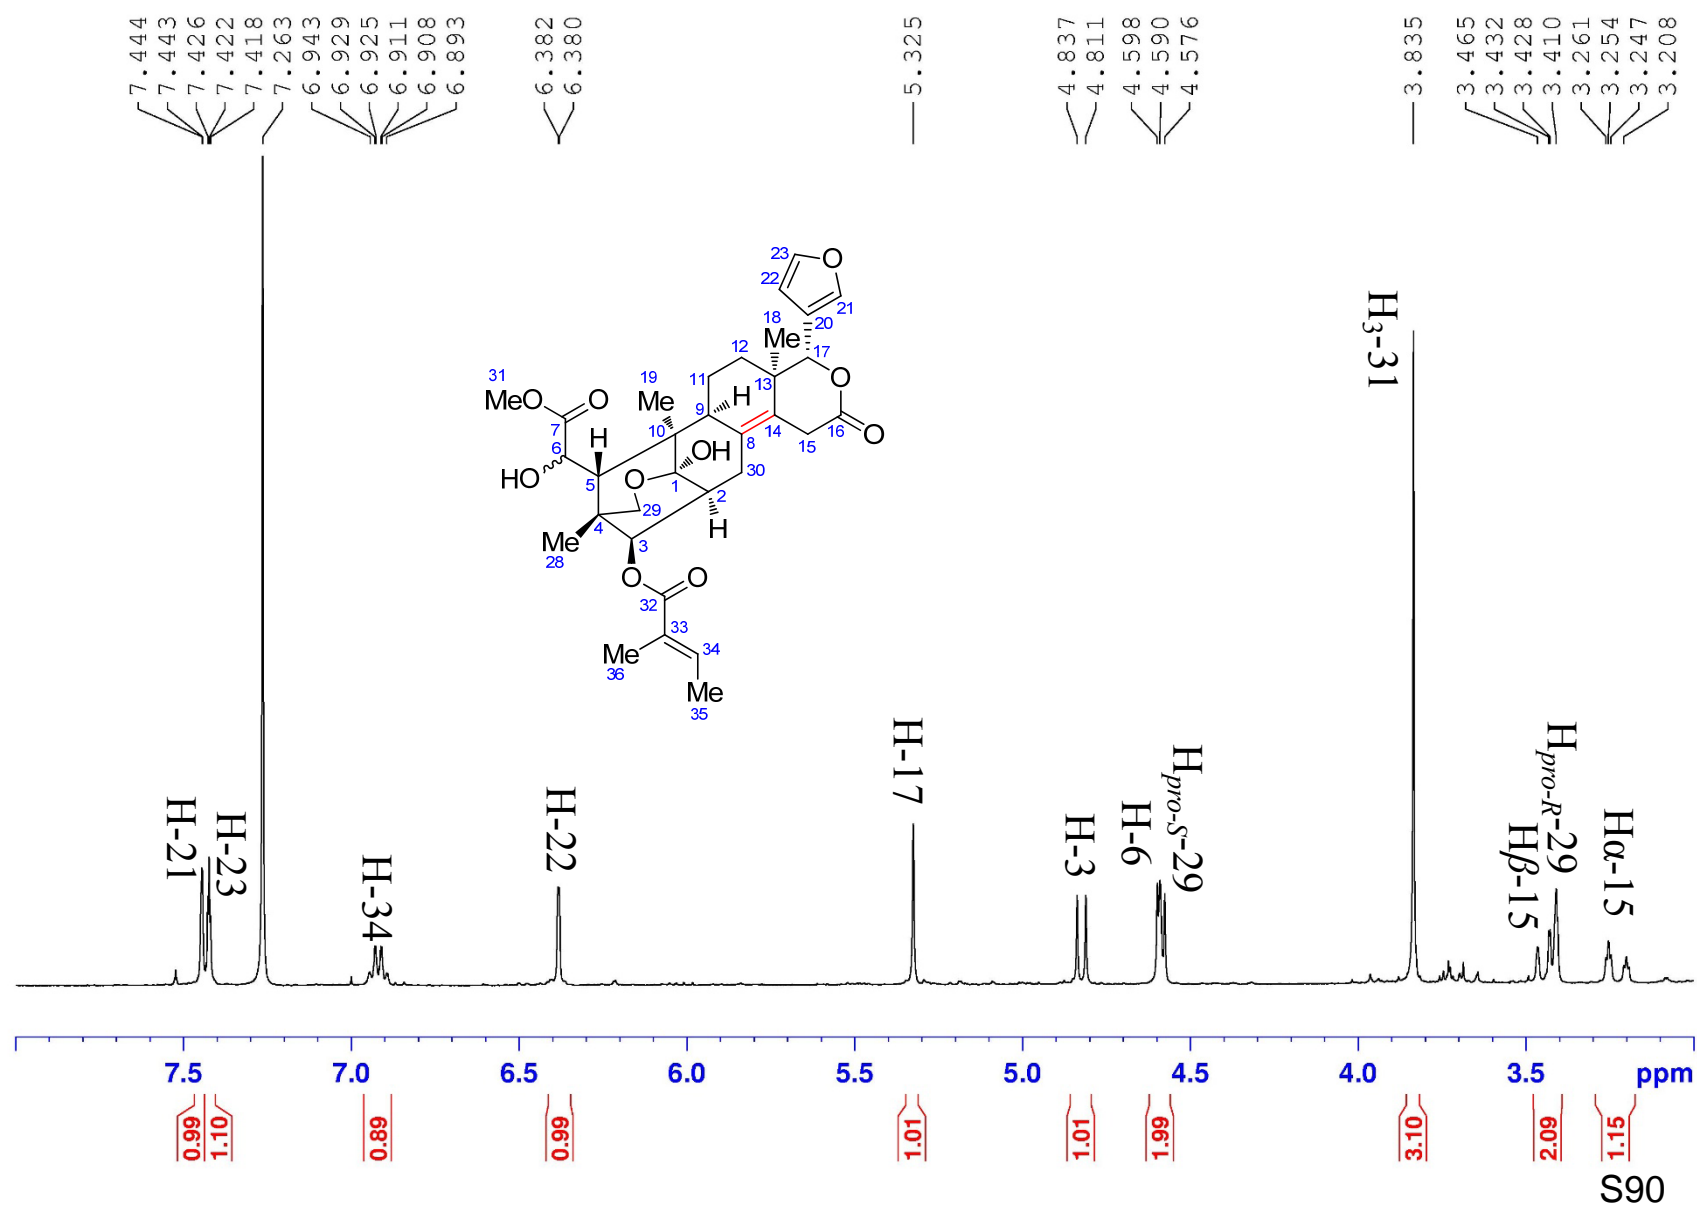



$^1\text{H}$  NMR (400 MHz) spectrum of compound **4** in  $\text{CDCl}_3$

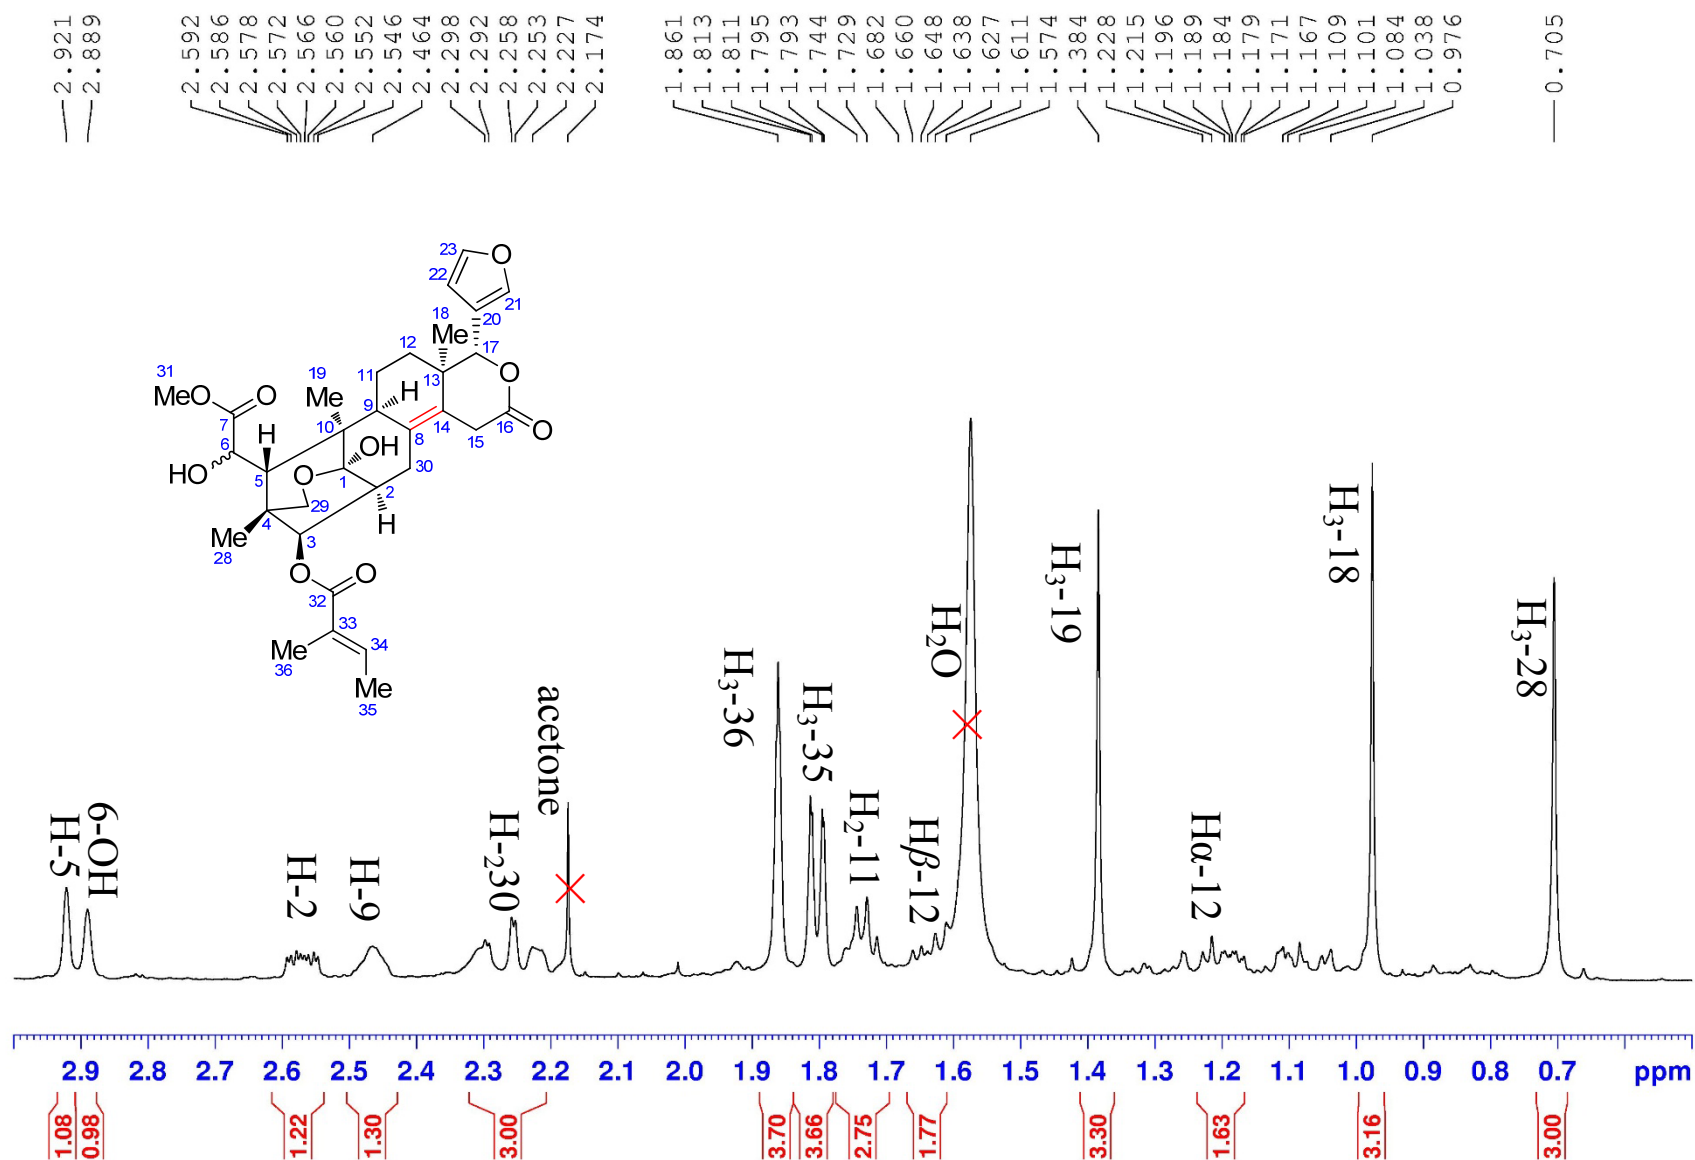

$^{13}\text{C}$  NMR (100 MHz) spectrum of compound **4** in  $\text{CDCl}_3$

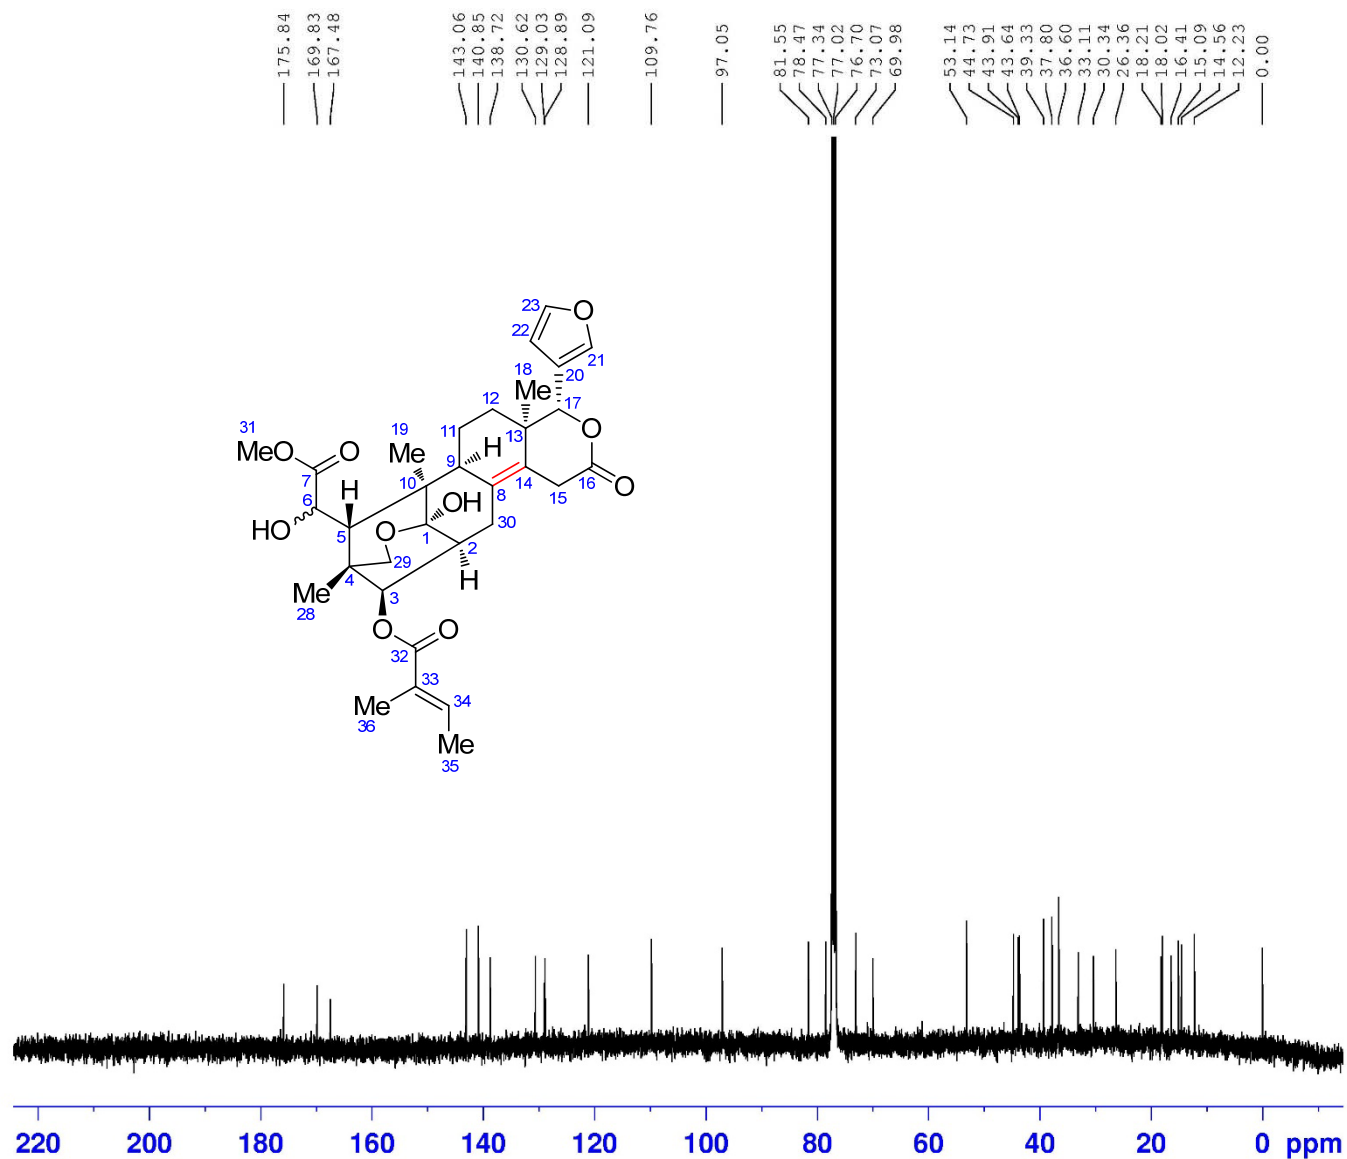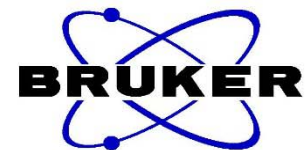

NAME ZXP-R-17-2-1-2  
 EXPNO 2  
 PROCNO 1  
 Date\_ 20180704  
 Time 7.26  
 INSTRUM spect  
 PROBHD 5 mm CPPBBO BB  
 PULPROG zgpg30  
 TD 65536  
 SOLVENT  $\text{CDCl}_3$   
 NS 1024  
 DS 4  
 SWH 24038.461 Hz  
 FIDRES 0.366798 Hz  
 AQ 1.3631988 sec  
 RG 147.94  
 DW 20.800 usec  
 DE 18.00 usec  
 TE 297.0 K  
 D1 2.00000000 sec  
 D11 0.03000000 sec  
 TD0 1

===== CHANNEL f1 =====  
 SFO1 100.6233324 MHz  
 NUC1  $^{13}\text{C}$   
 P1 10.00 usec  
 SI 32768  
 SF 100.6127689 MHz  
 WDW EM  
 SSB 0  
 LB 1.00 Hz  
 GB 0  
 PC 1.40

$^{13}\text{C}$  NMR (100 MHz) spectrum of compound **4** in  $\text{CDCl}_3$

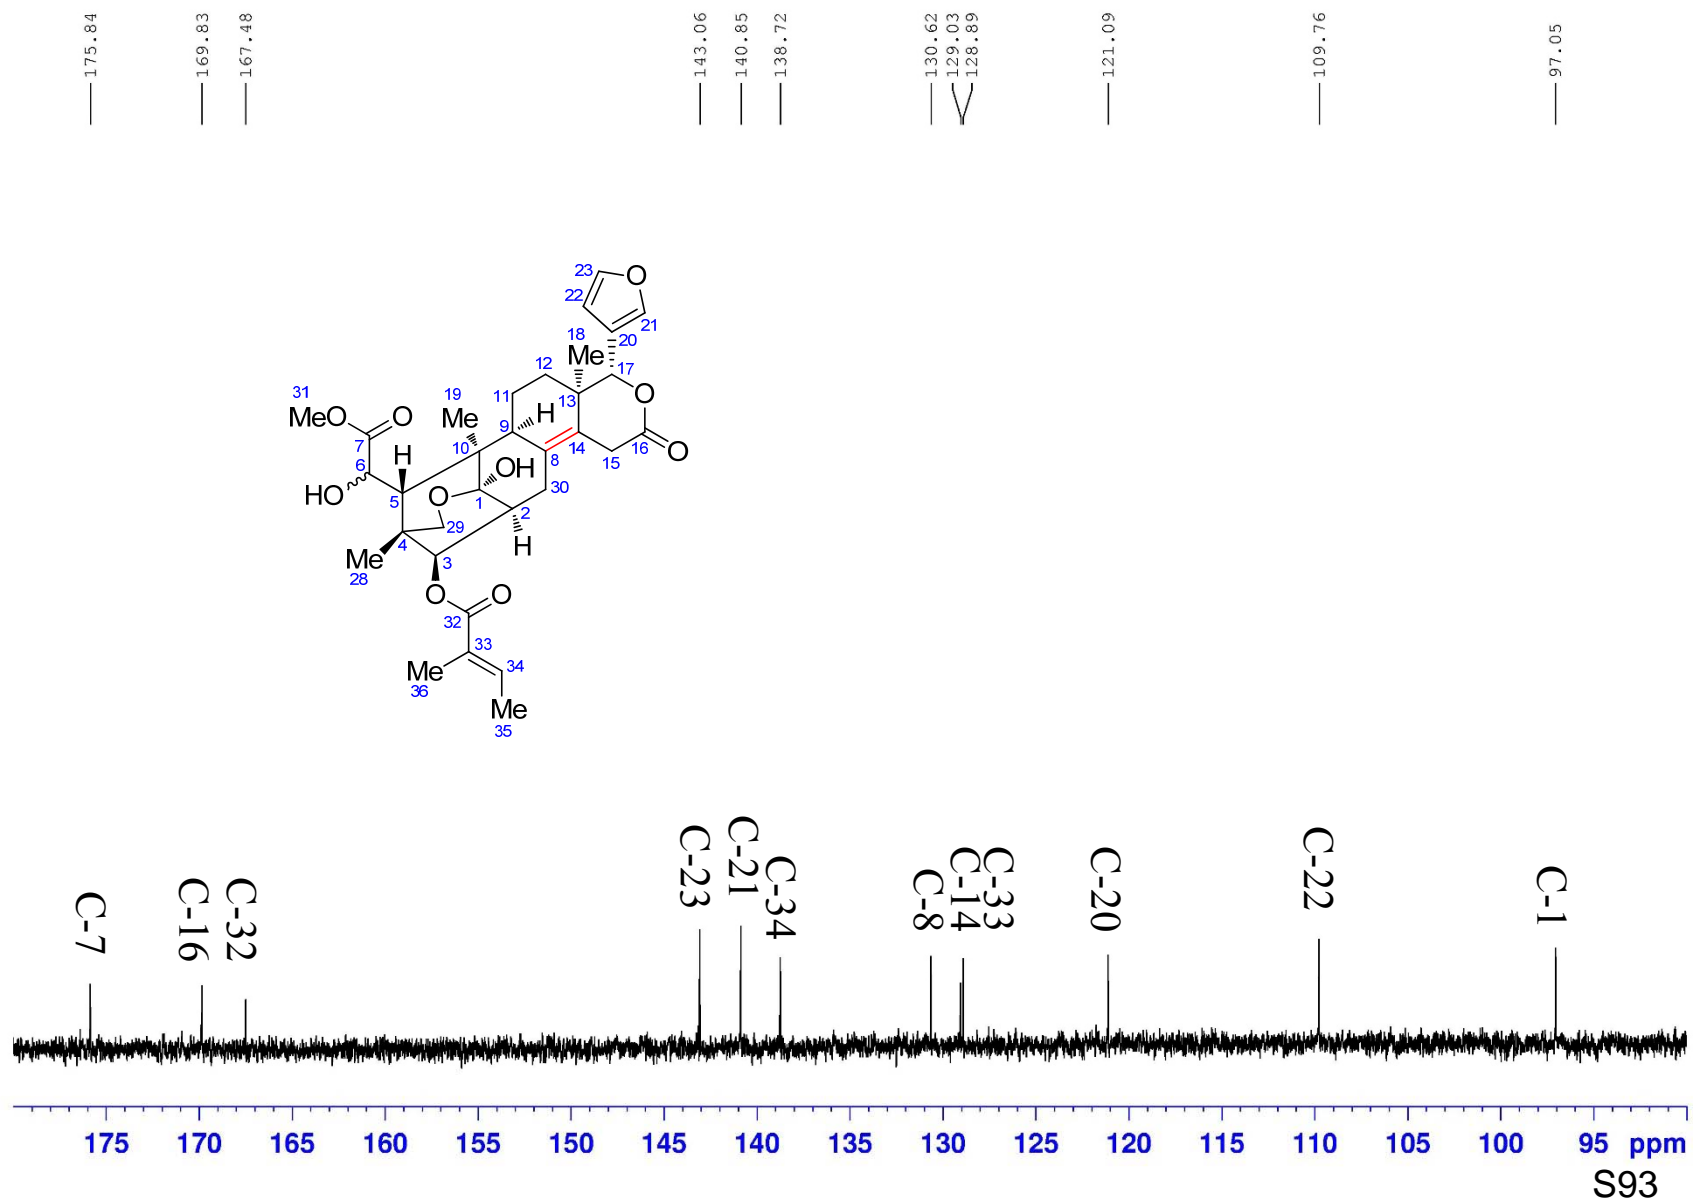

$^{13}\text{C}$  NMR (100 MHz) spectrum of compound **4** in  $\text{CDCl}_3$

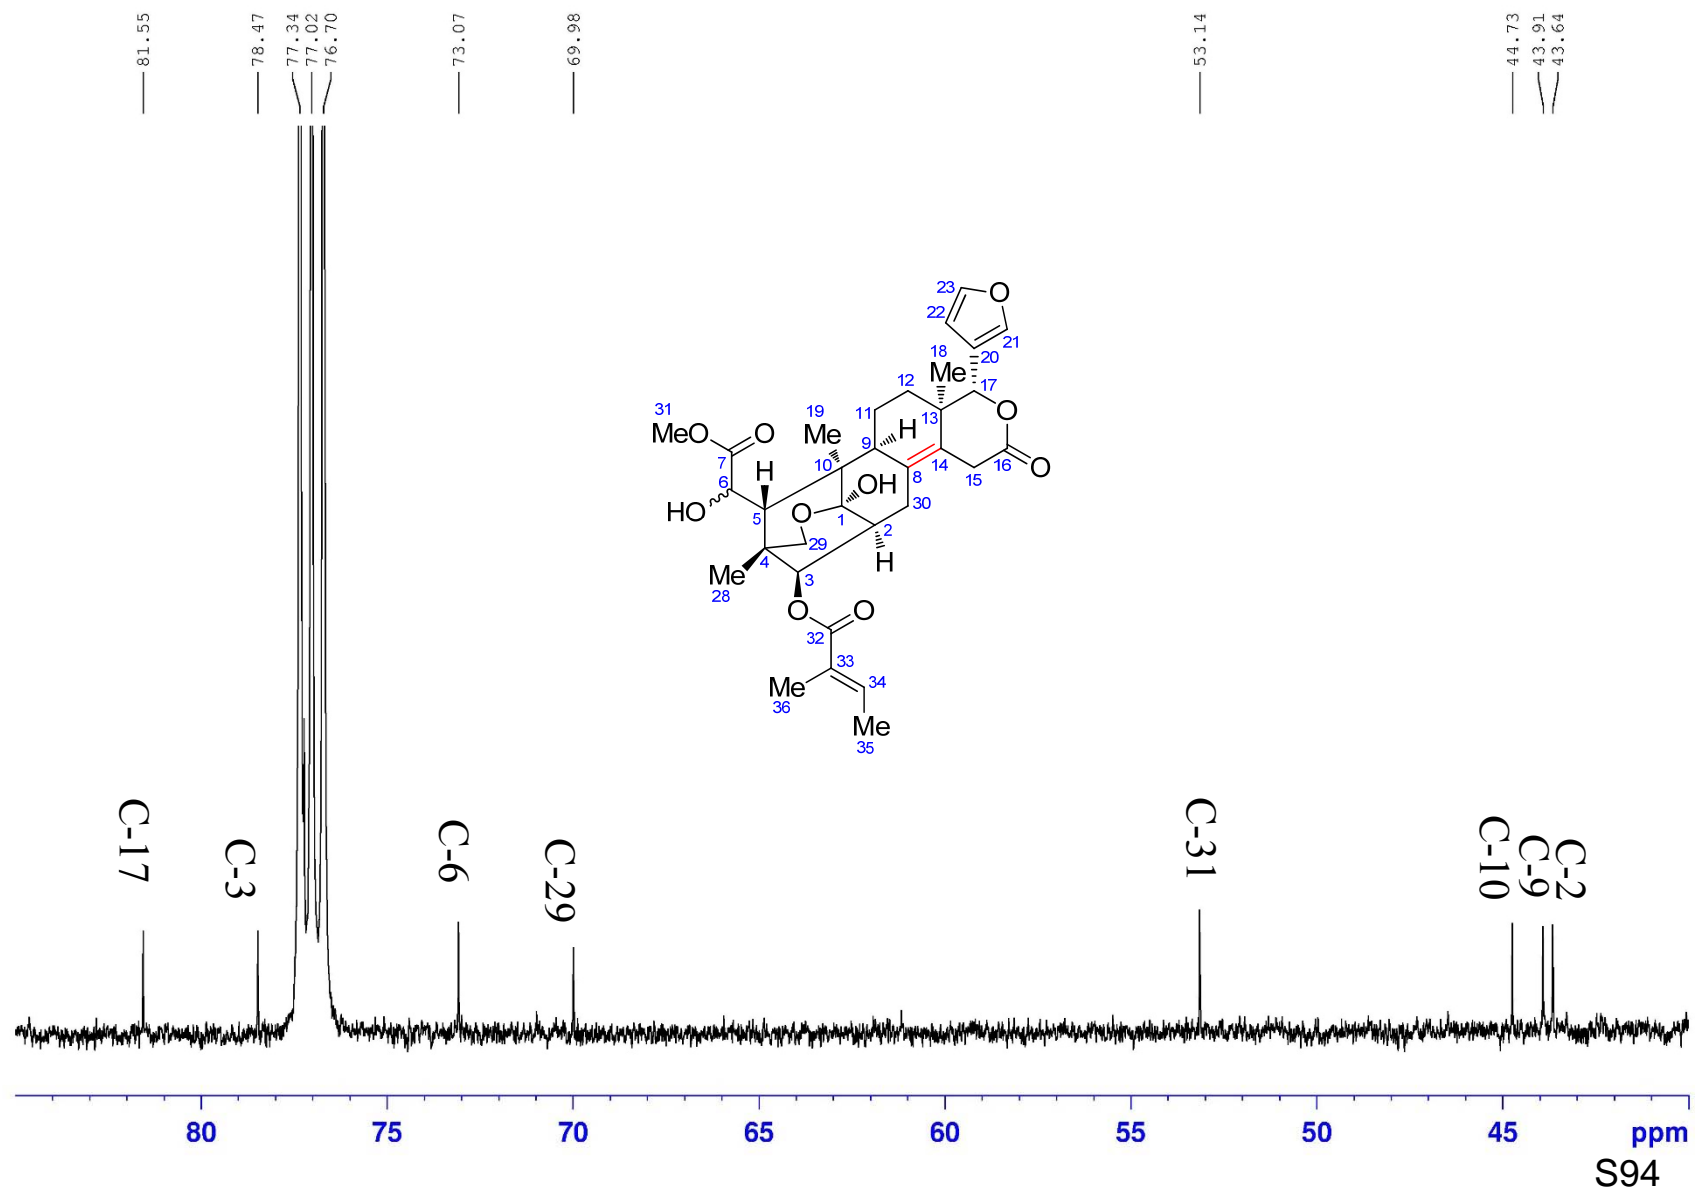

$^{13}\text{C}$  NMR (100 MHz) spectrum of compound **4** in  $\text{CDCl}_3$

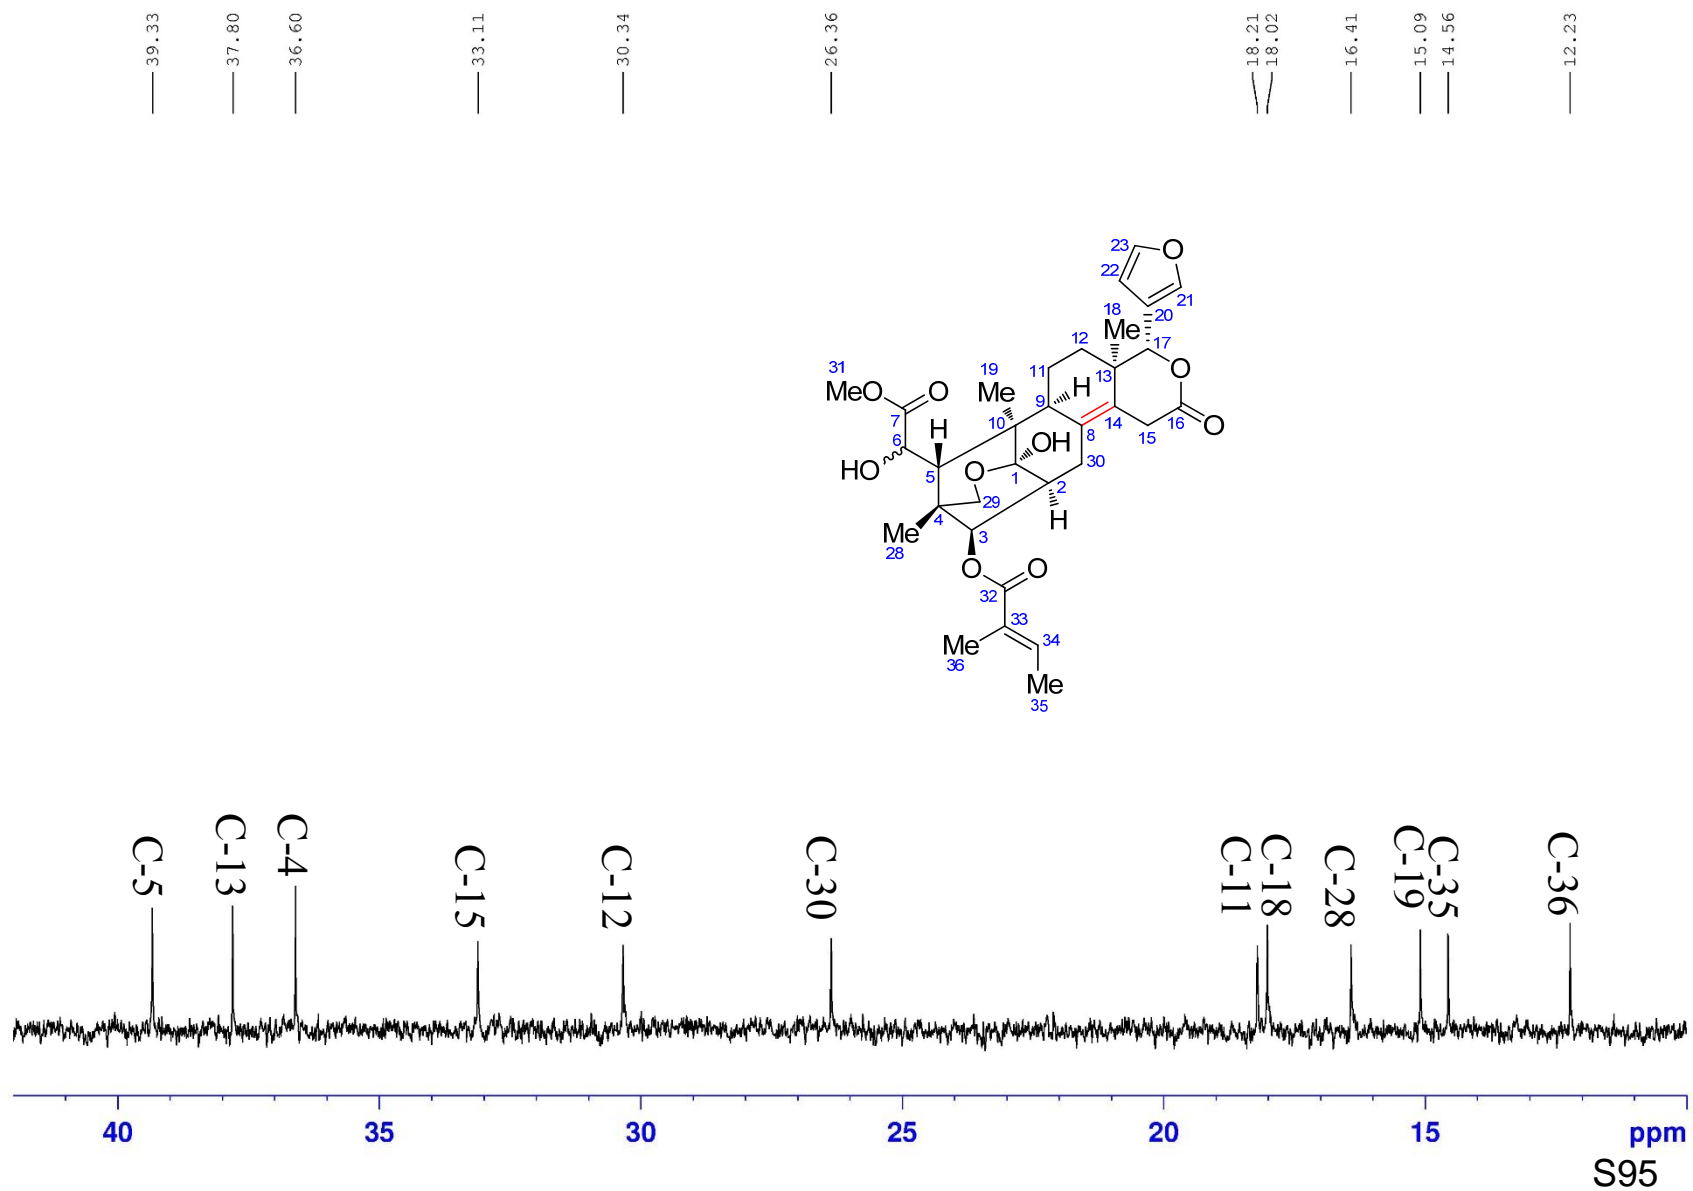

# DEPT135 (100 MHz) spectrum of compound **4** in CDCl<sub>3</sub>

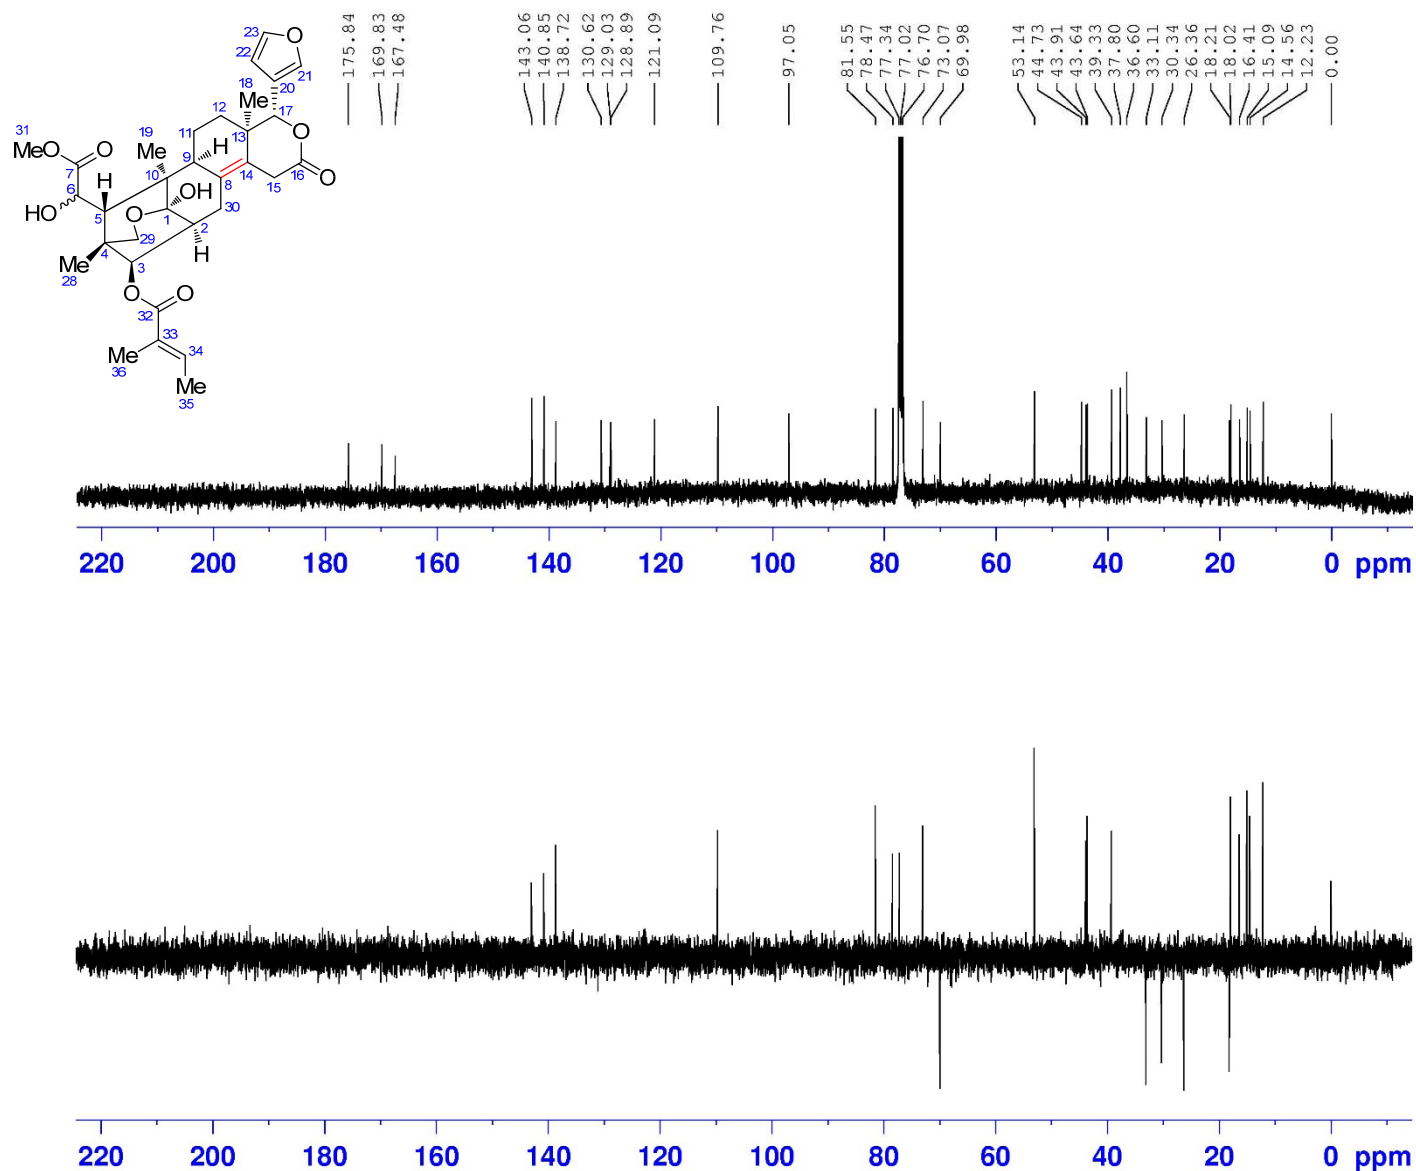

NAME ZXP-R-17-2-1-2  
 EXPNO 2  
 PROCNO 1  
 Date\_ 20180704  
 Time 7.26  
 INSTRUM spect  
 PROBHD 5 mm CPPBBO BB  
 PULPROG zgpg30  
 TD 65536  
 SOLVENT CDCl3  
 NS 1024  
 DS 4  
 SWH 24038.461 Hz  
 FIDRES 0.366798 Hz  
 AQ 1.3631988 sec  
 RG 147.94  
 DW 20.800 usec  
 DE 18.00 usec  
 TE 297.0 K  
 D1 2.00000000 sec  
 D11 0.03000000 sec  
 TD0 1

===== CHANNEL f1 =====  
 SFO1 100.6233324 MHz  
 NUC1 13C  
 P1 10.00 usec  
 SI 32768  
 SF 100.6127689 MHz  
 WDW EM  
 SSB 0  
 LB 1.00 Hz  
 GB 0  
 PC 1.40

DEPT135 (100 MHz) spectrum of compound **4** in CDCl<sub>3</sub>

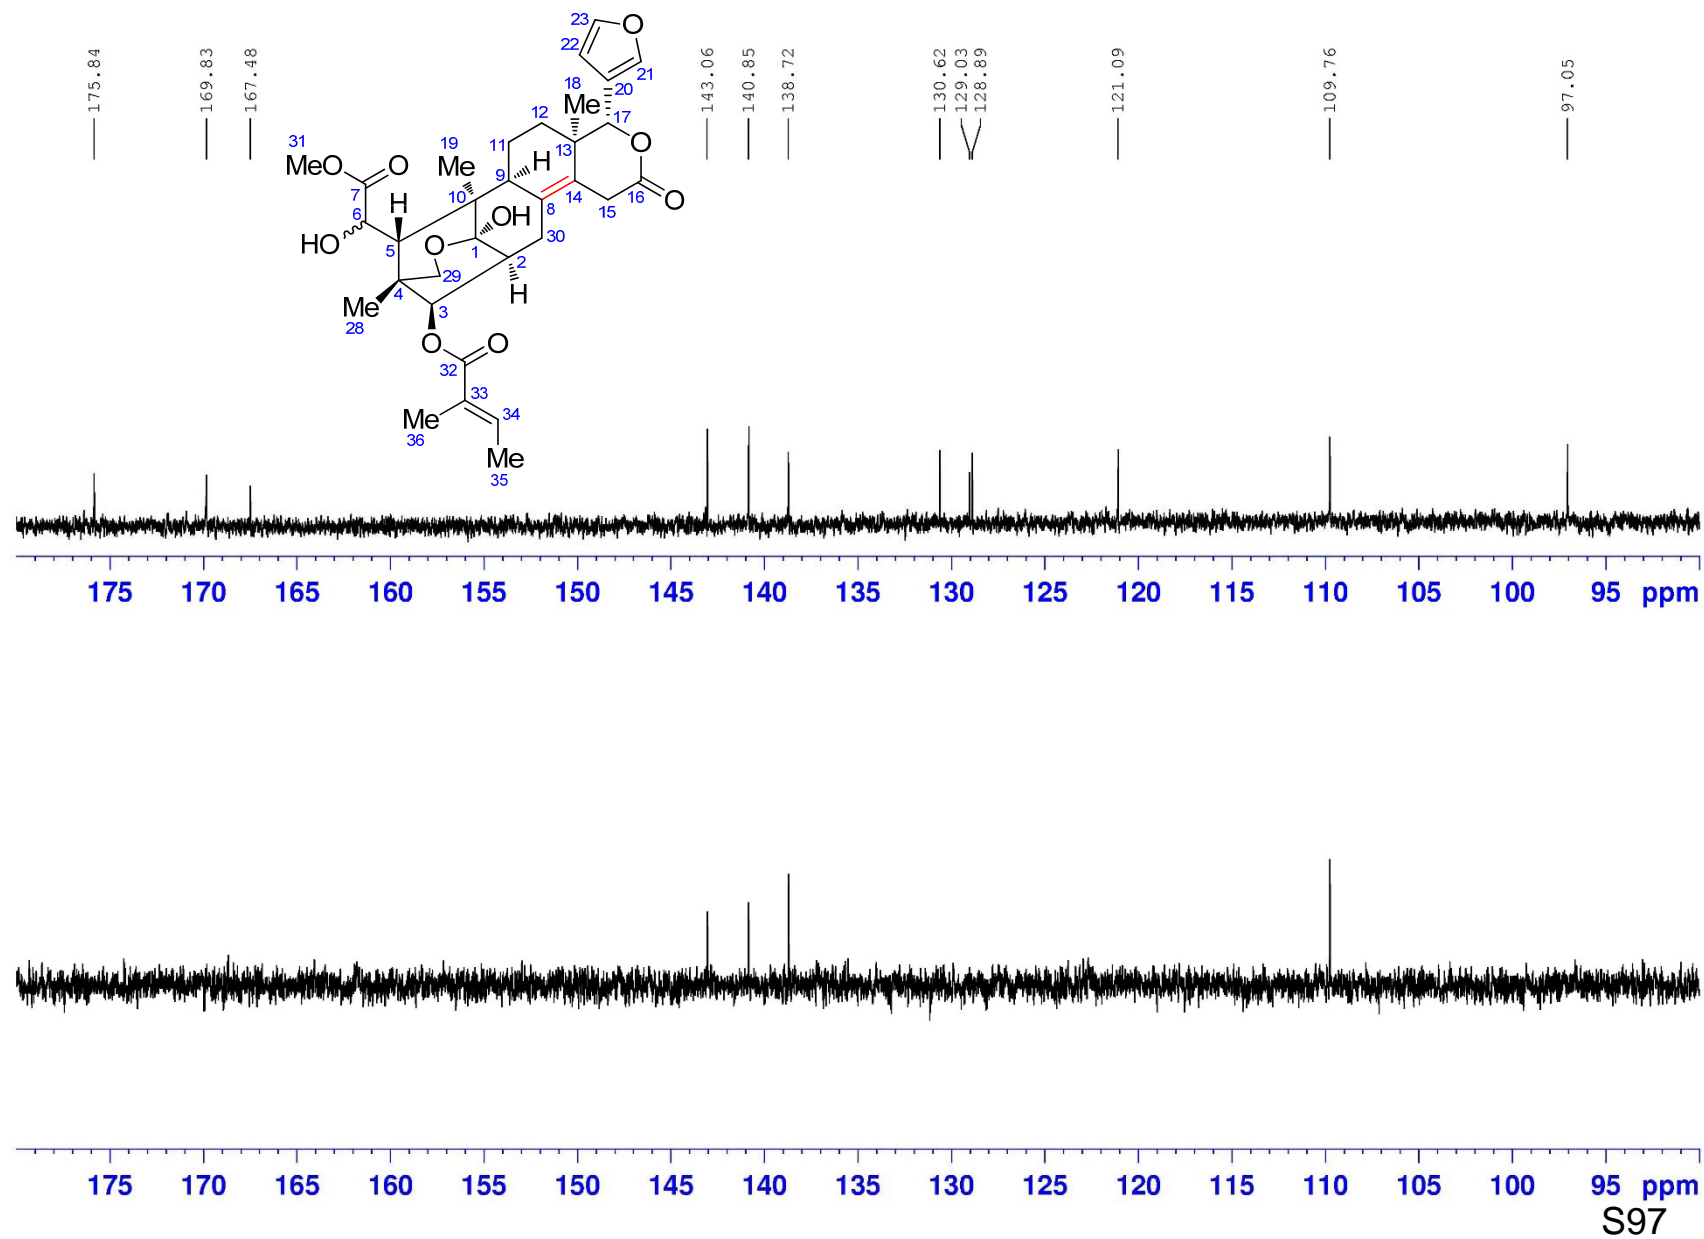

DEPT135 (100 MHz) spectrum of compound **4** in CDCl<sub>3</sub>

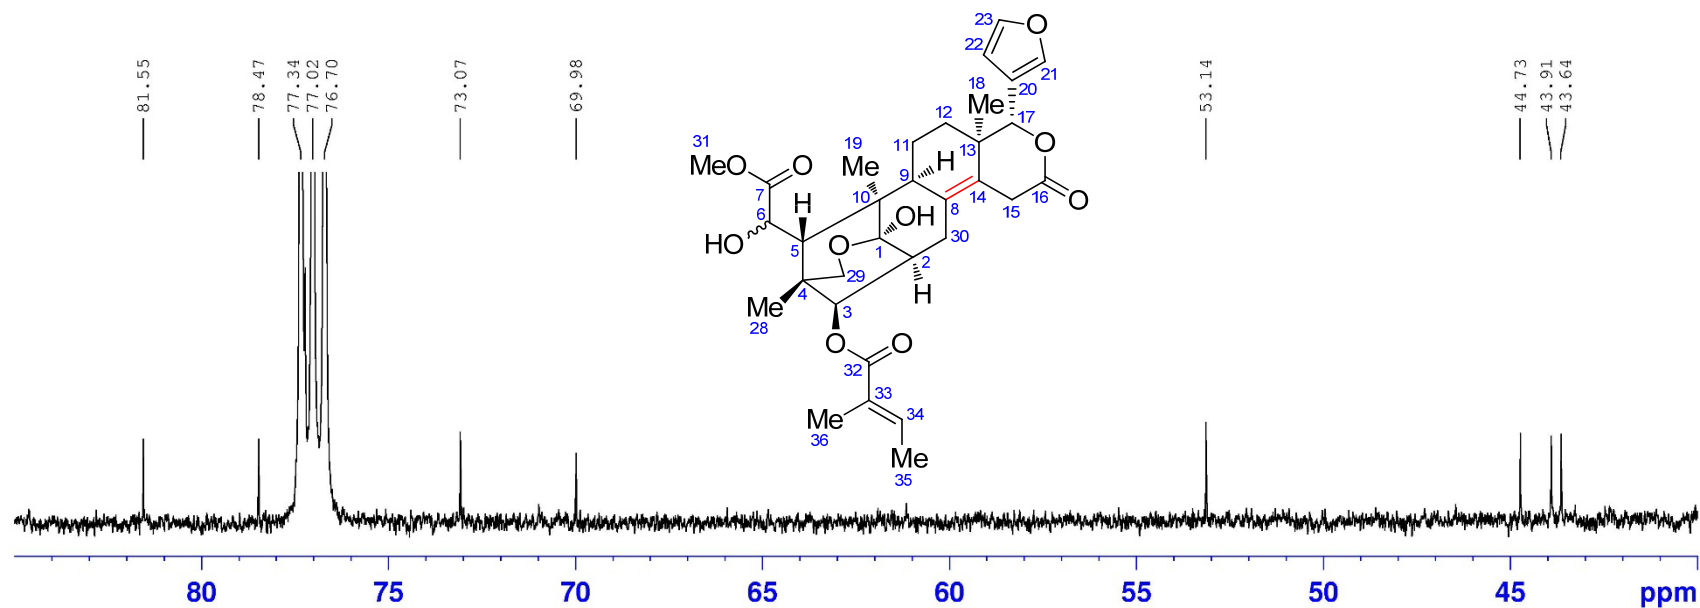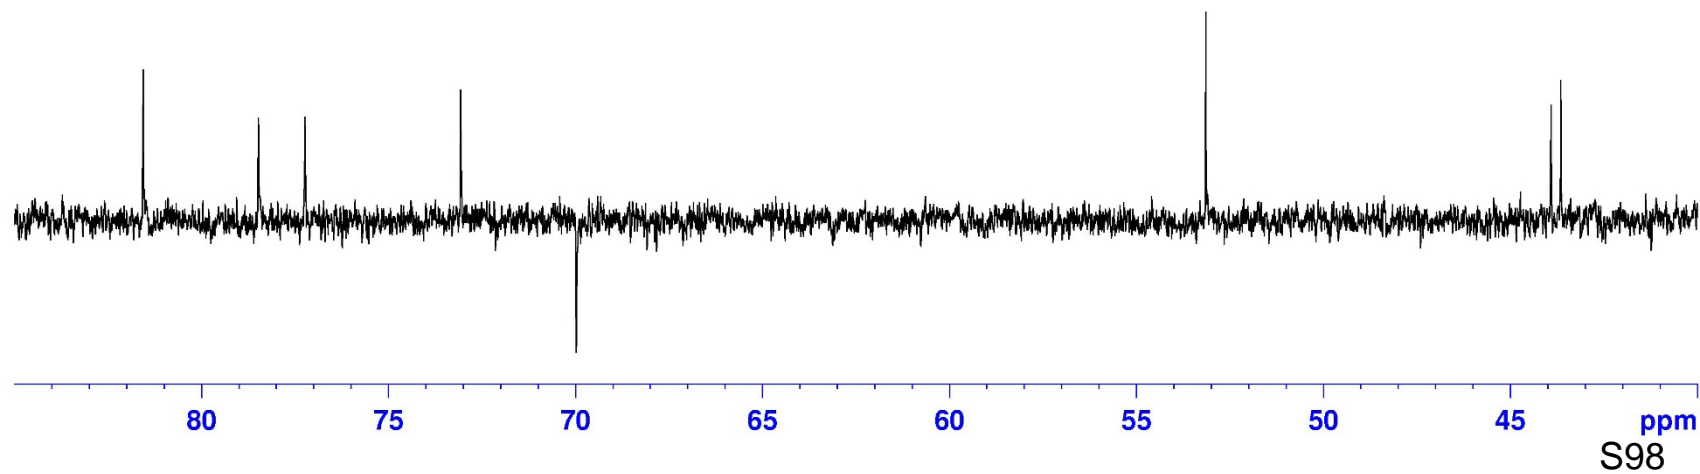



DEPT135 (100 MHz) spectrum of compound **4** in CDCl<sub>3</sub>

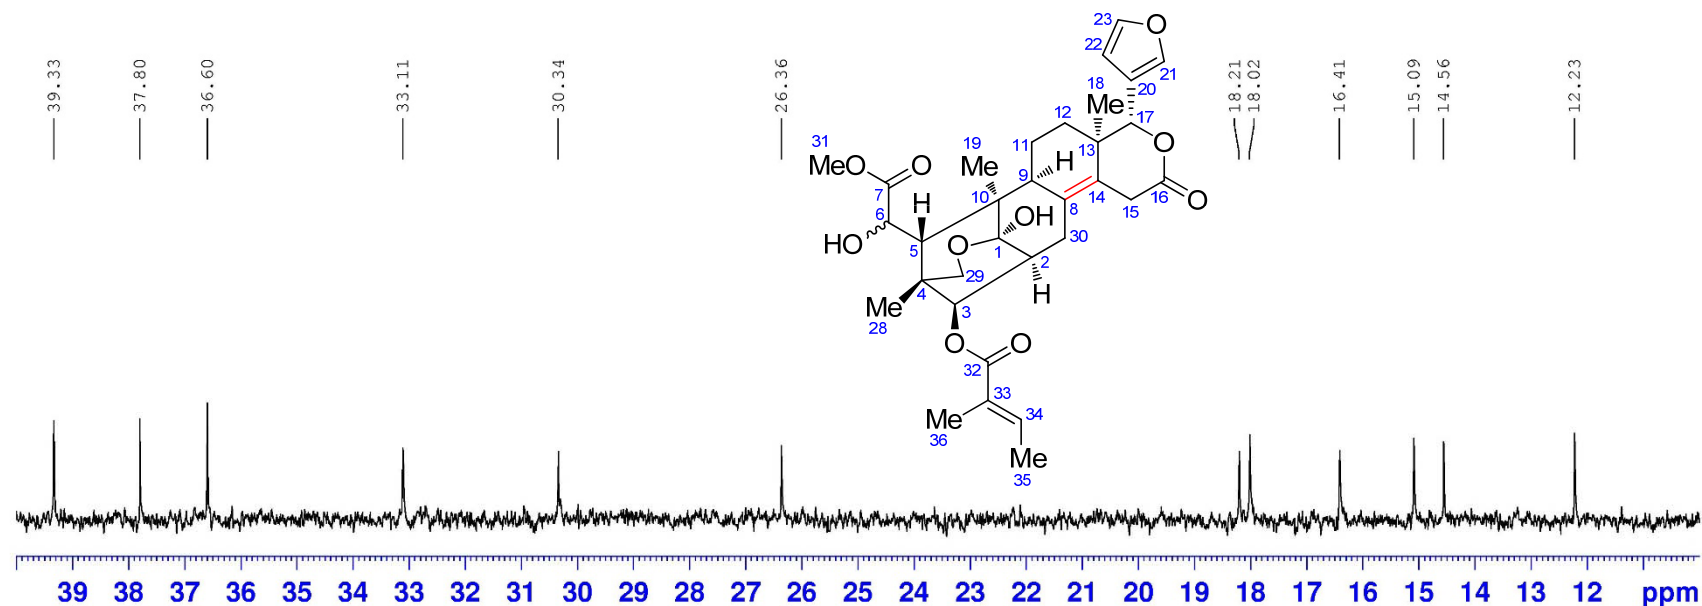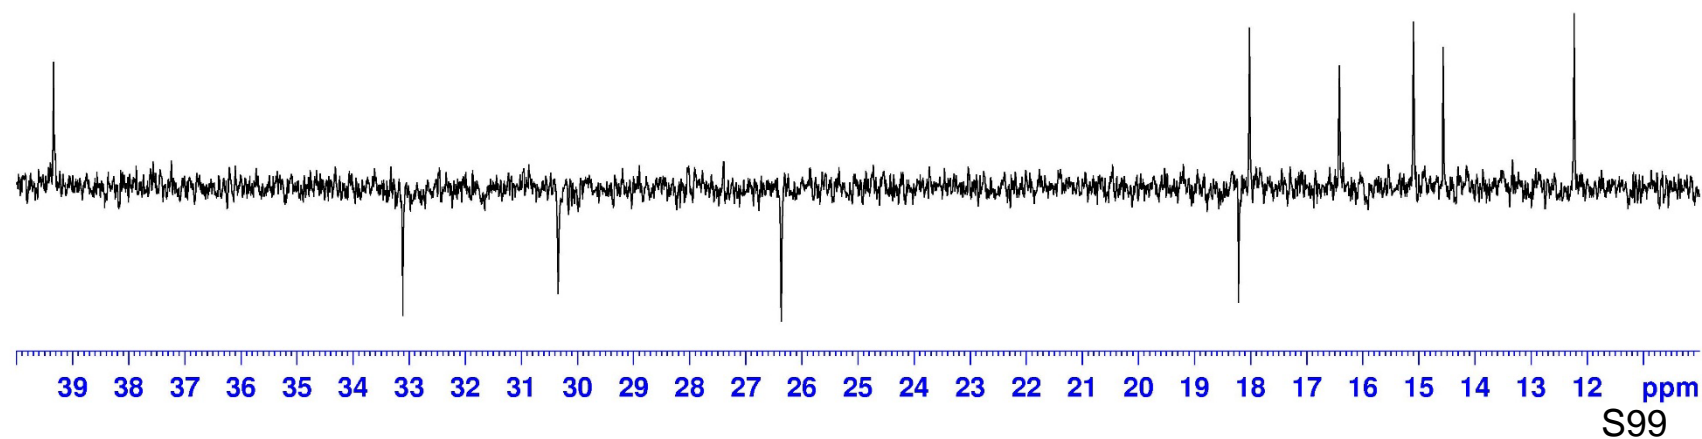

# $^1\text{H}$ - $^1\text{H}$ COSY (400 MHz) spectrum of compound **4** in $\text{CDCl}_3$

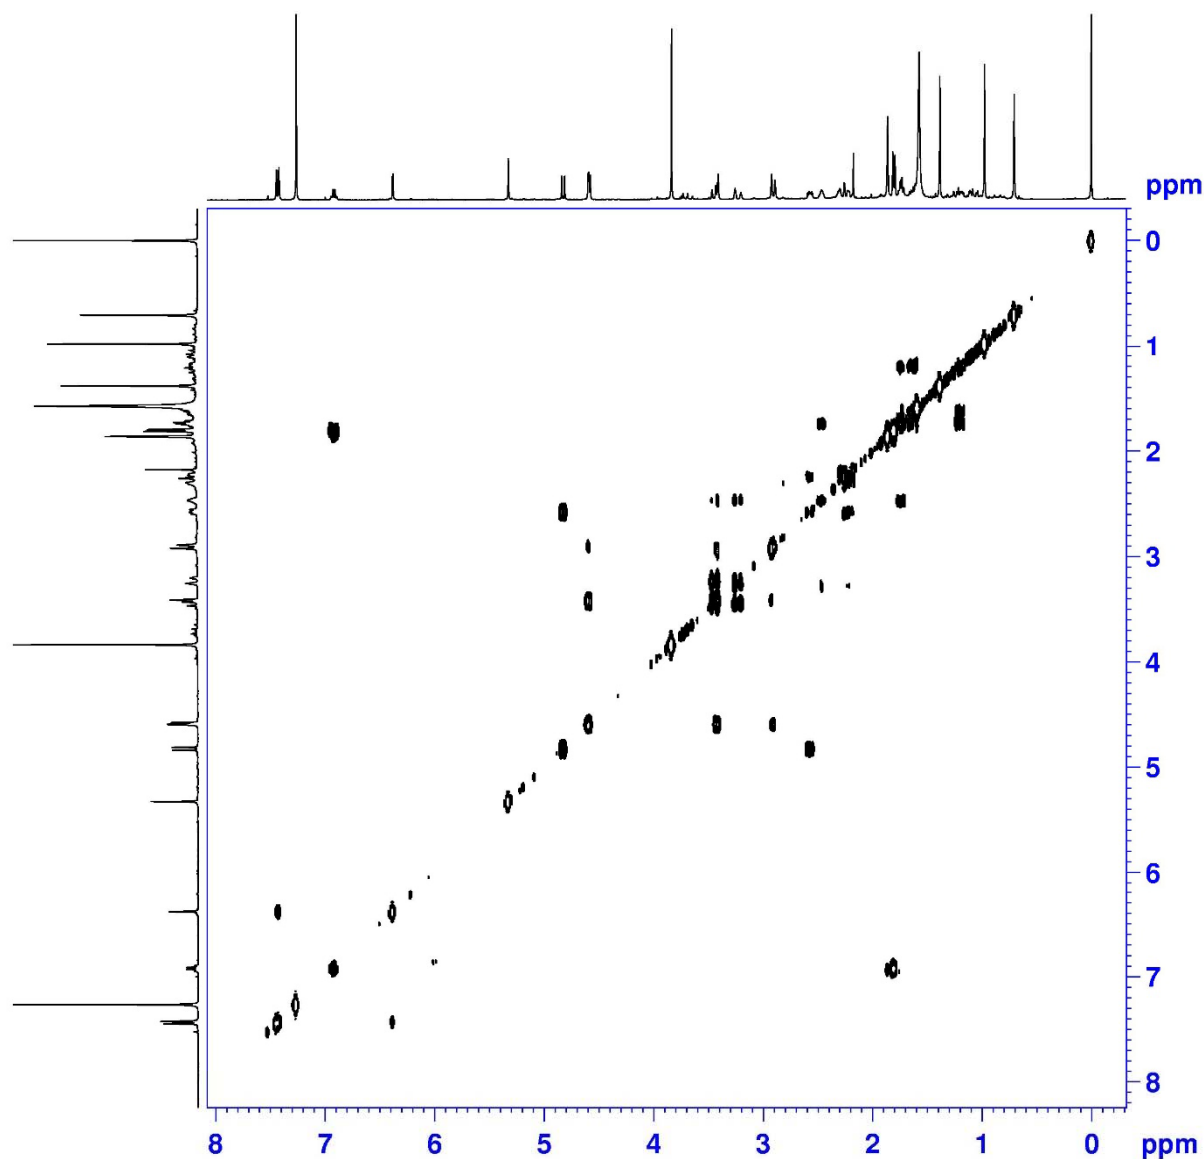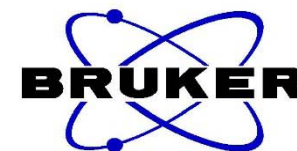

NAME ZXP-R-17-2-1-2  
EXPNO 4  
PROCNO 1  
Date\_ 20180707  
Time 17.34  
INSTRUM spect  
PROBHD 5 mm CFPBBO BB  
PULPROG cosygppqf  
TD 2048  
SOLVENT  $\text{CDCl}_3$   
NS 8  
DS 8  
SWH 3906.250 Hz  
FIDRES 1.907349 Hz  
AQ 0.2621940 sec  
RG 208.5  
DW 128.000 usec  
DE 10.00 usec  
TE 297.0 K  
D0 0.00000300 sec  
D1 1.89678097 sec  
D11 0.03000000 sec  
D12 0.00002000 sec  
D13 0.00000400 sec  
D16 0.00020000 sec  
IN0 0.00025600 sec

===== CHANNEL f1 =====  
SFO1 400.1318006 MHz  
NUC1  $^1\text{H}$   
P0 11.50 usec  
P1 11.50 usec  
P17 2500.00 usec  
ND0 1  
TD 128  
SFO1 400.1318 MHz  
FIDRES 30.517578 Hz  
SW 9.762 ppm  
FrMODE QF  
SI 1024  
SF 400.1300060 MHz  
WDW QSINE  
SSB 0  
LB 0.00 Hz  
GB 0  
PC 1.40  
SI 1024  
MC2 QF  
SF 400.1300049 MHz  
WDW QSINE  
SSB 0  
LB 0.00 Hz  
GB 0

S100

$^1\text{H}$ - $^1\text{H}$  COSY (400 MHz) spectrum of compound **4** in  $\text{CDCl}_3$

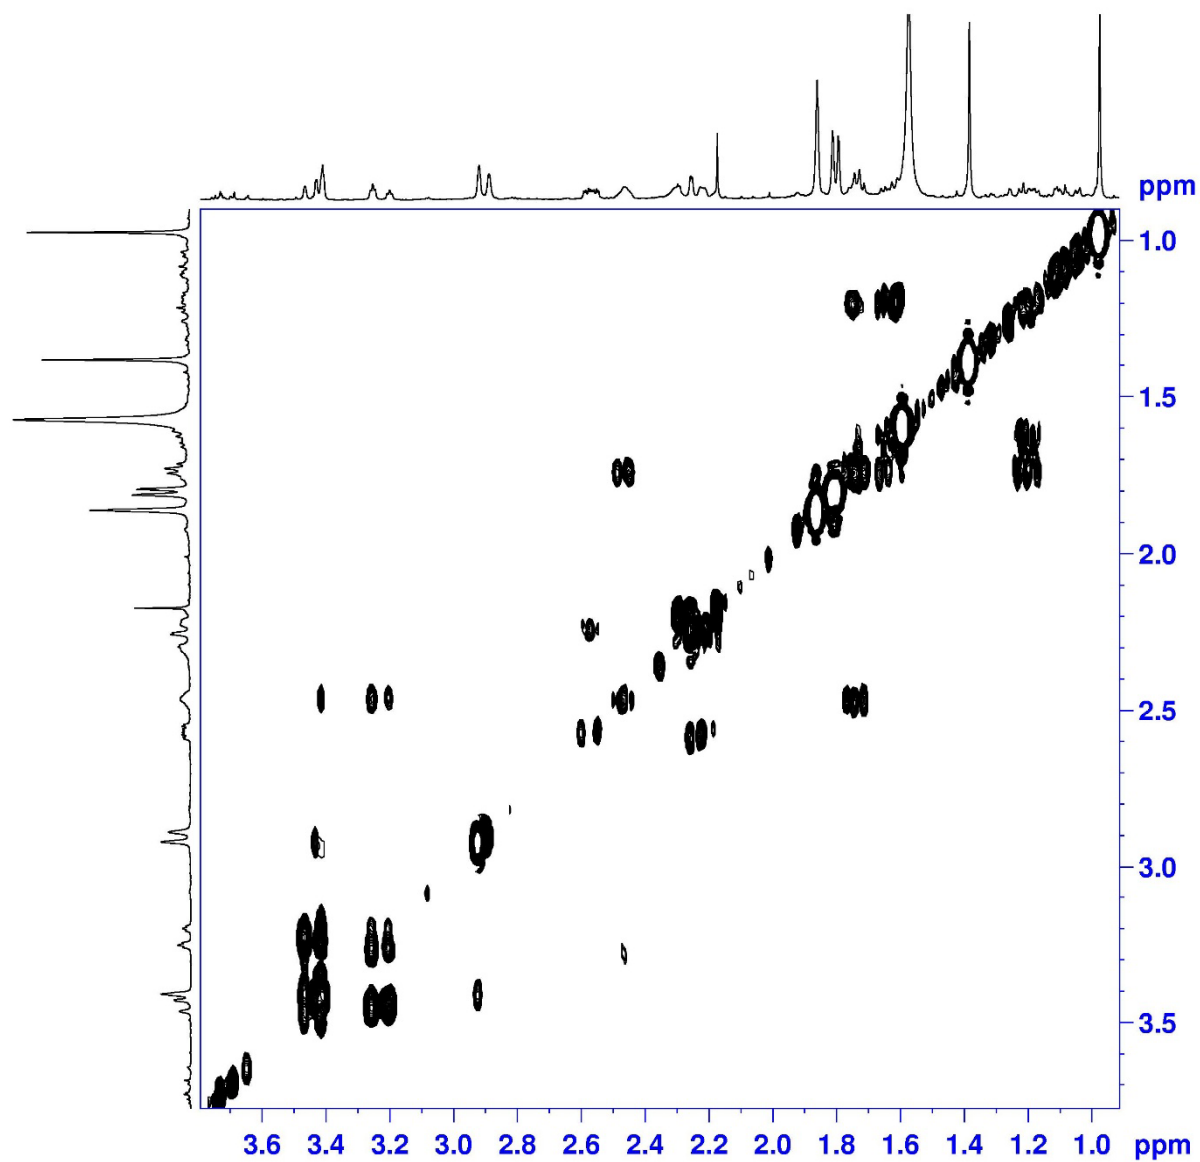

# HSQC (400 MHz) spectrum of compound **4** in CDCl<sub>3</sub>

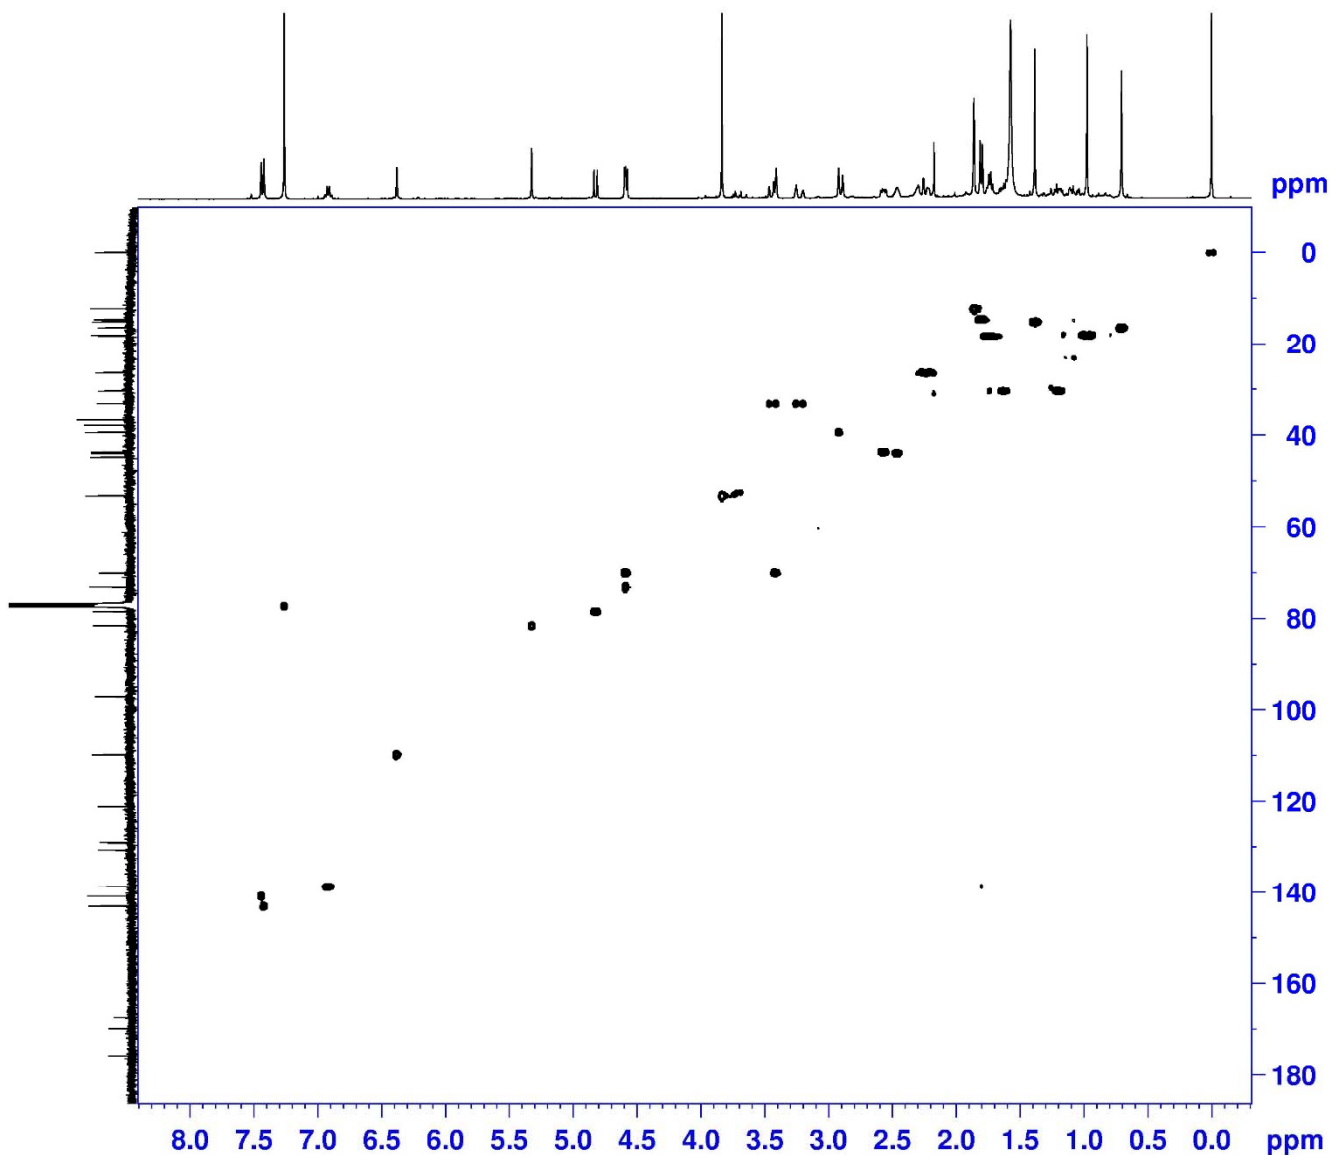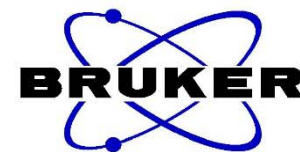

NAME ZXP-R-17-2-1-2  
EXPNO 5  
PROCNO 1  
Date\_ 20180707  
Time 18.14  
INSTRUM spect  
PROBHD 5 mm CFPBBO BB  
PULPROG hsqcetgpsi2  
TD 1024  
SOLVENT CDCl<sub>3</sub>  
NS 16  
DS 16  
SWH 4302.926 Hz  
FIDRES 4.202076 Hz  
AQ 0.1190388 sec  
RG 208.5  
DW 116.200 usec  
DE 10.00 usec  
TE 297.0 K  
CNST2 145.0000000  
D0 0.00000300 sec  
D1 1.46497905 sec  
D4 0.00172414 sec  
D11 0.03000000 sec  
D16 0.00020000 sec  
D24 0.00086207 sec  
IN0 0.00002080 sec  
ZGPTNS

===== CHANNEL f1 =====  
SF01 400.1320007 MHz  
NUC1 <sup>1</sup>H  
P1 11.50 usec  
P2 23.00 usec  
P28 0.00 usec  
ND0 2  
TD 256  
SF01 100.6233 MHz  
FIDRES 93.900238 Hz  
SW 238.896 ppm  
FnMODE Echo-Antiecho  
SI 1024  
SF 400.1300068 MHz  
WDW QSINE  
SSB 2  
LB 0.00 Hz  
GB 0  
PC 1.40  
SI 1024  
MC2 echo-antiecho  
SF 100.6127562 MHz  
WDW QSINE  
SSB 2  
LB 0.00 Hz  
GB 0

HSQC (400 MHz) spectrum of compound **4** in  $\text{CDCl}_3$

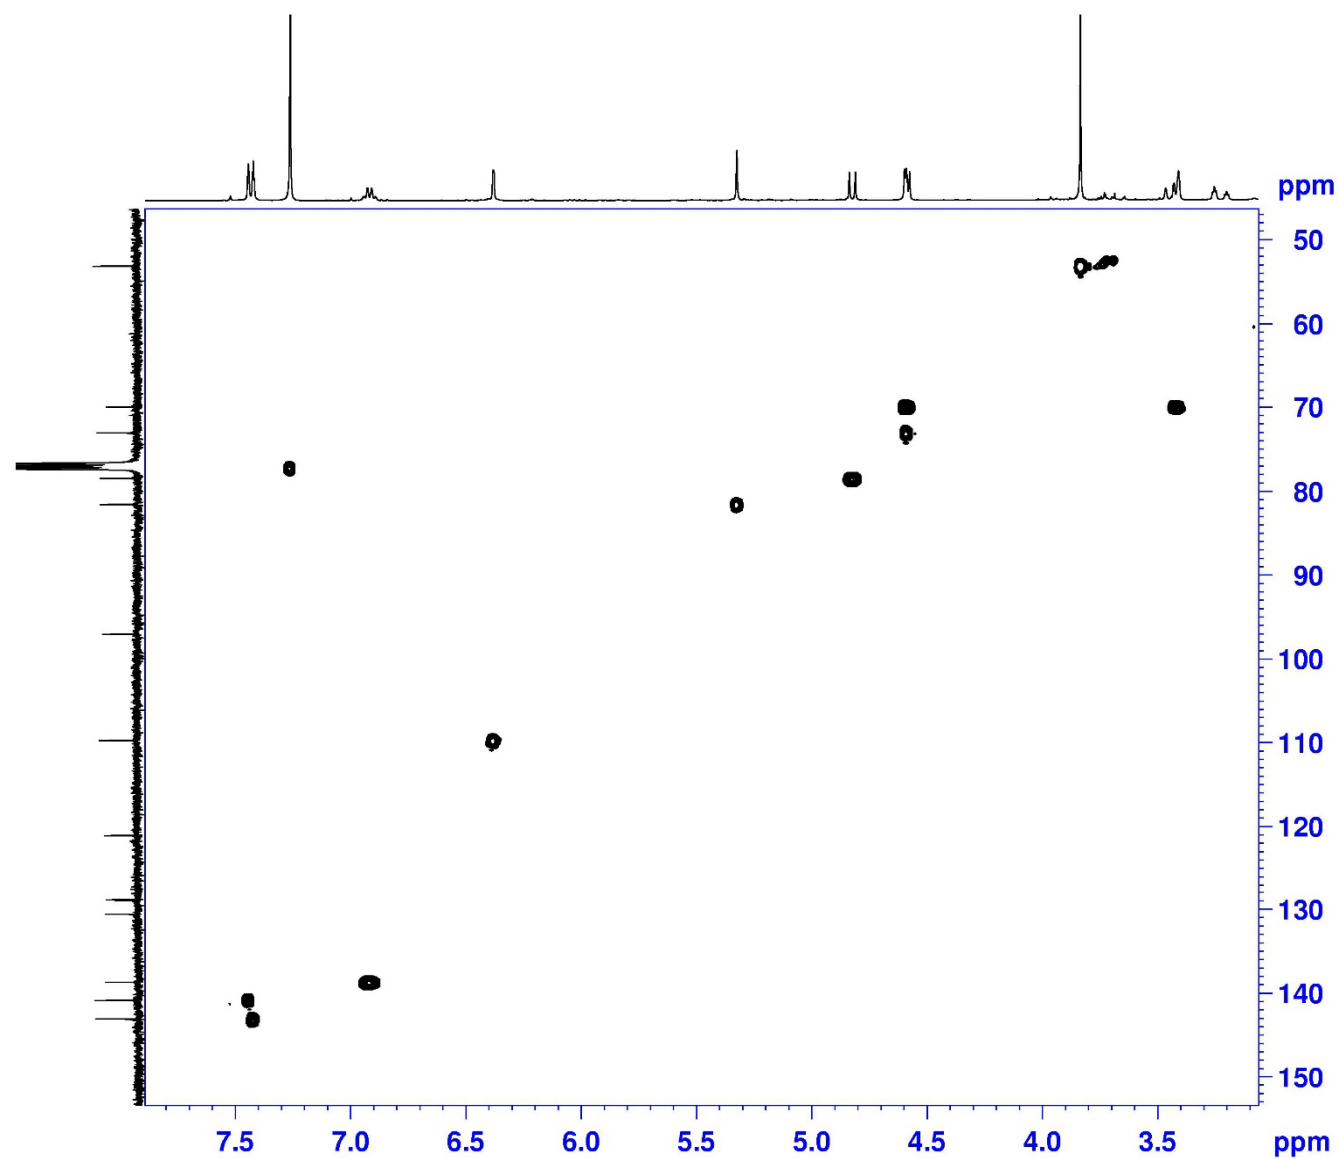

HSQC (400 MHz) spectrum of compound **4** in  $\text{CDCl}_3$

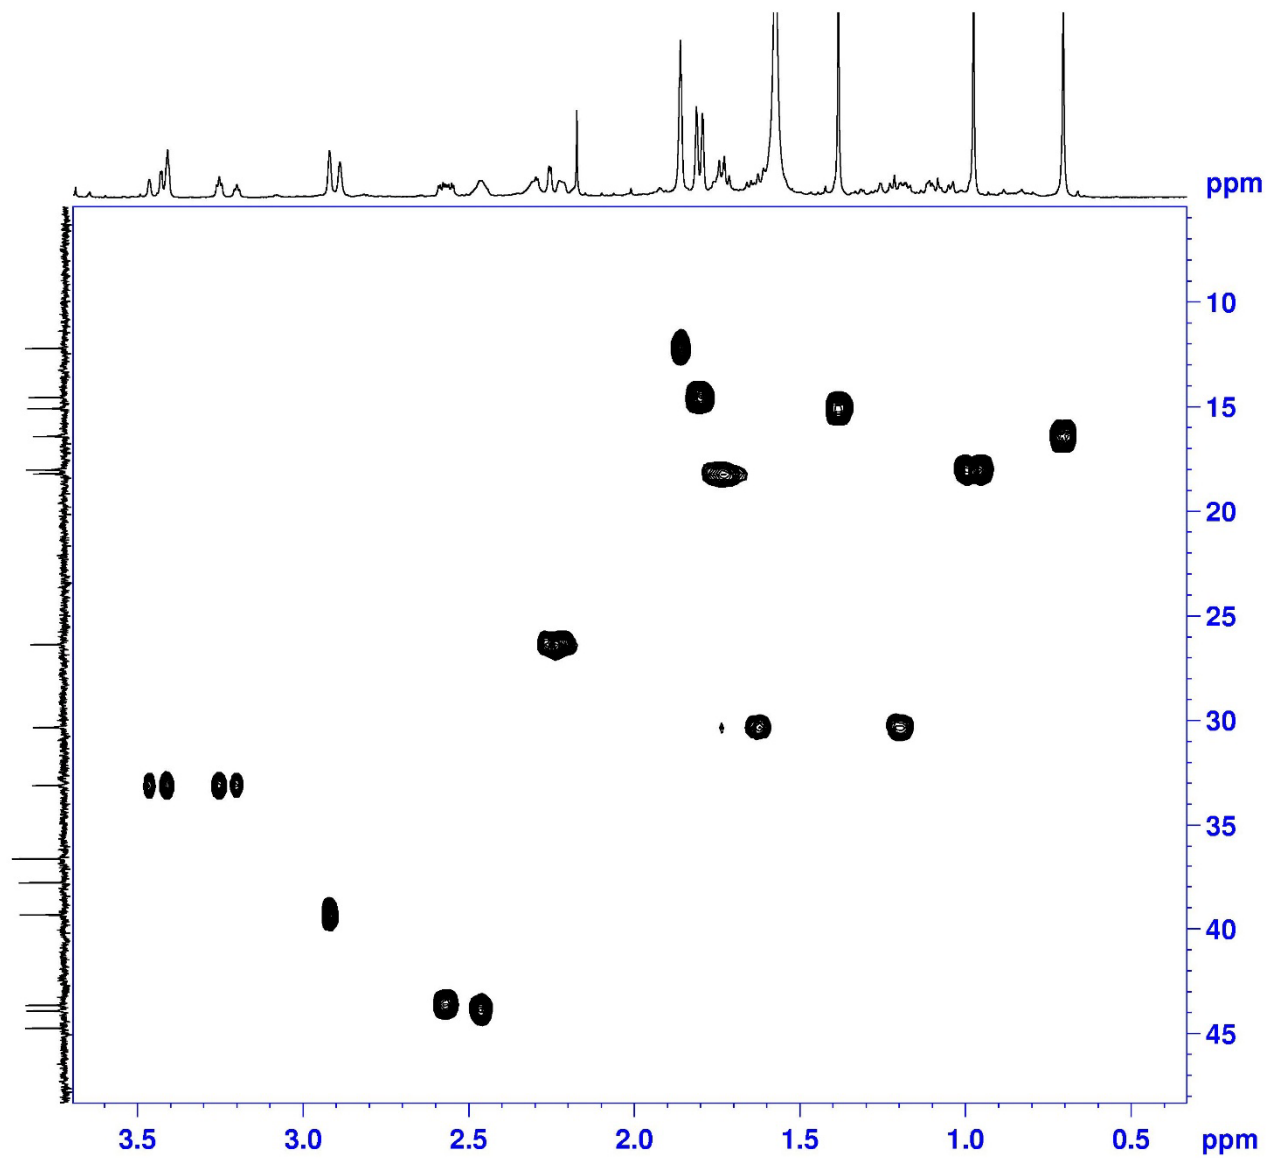

# HMBC (400 MHz) spectrum of compound **4** in CDCl<sub>3</sub>

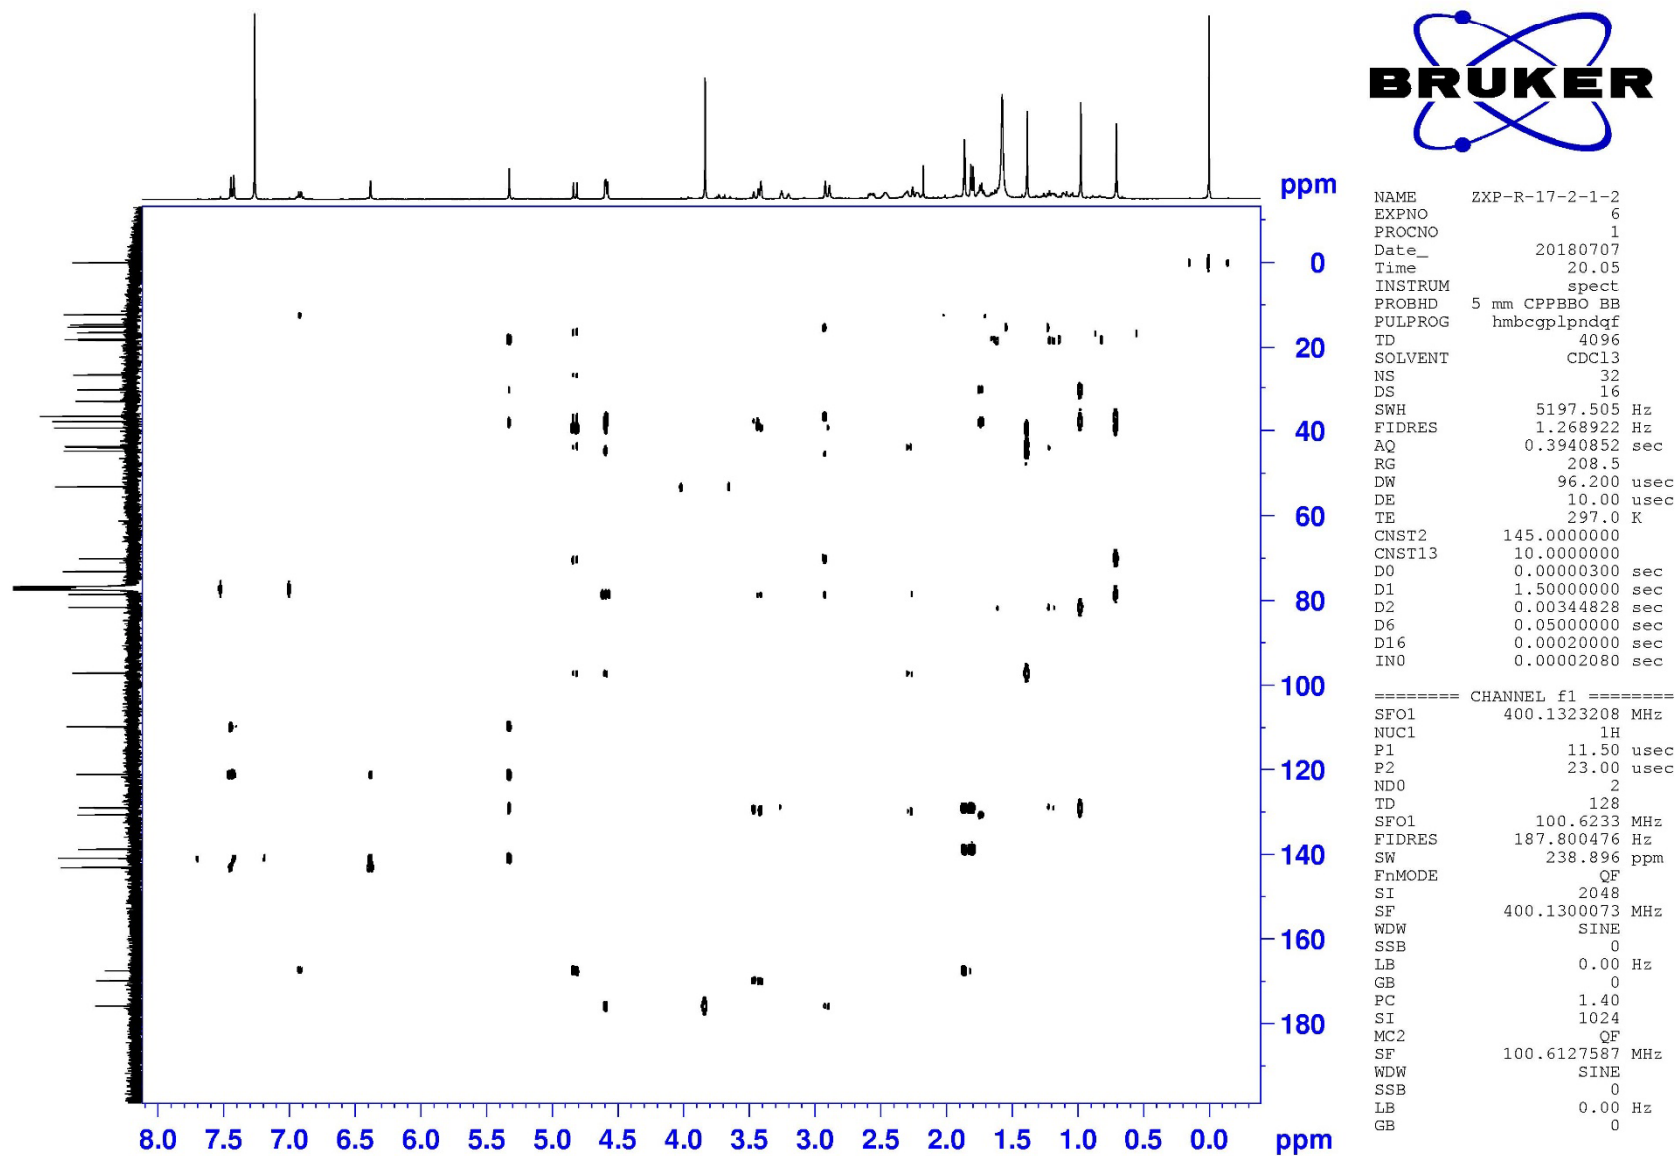

HMBC (400 MHz) spectrum of compound **4** in CDCl<sub>3</sub>

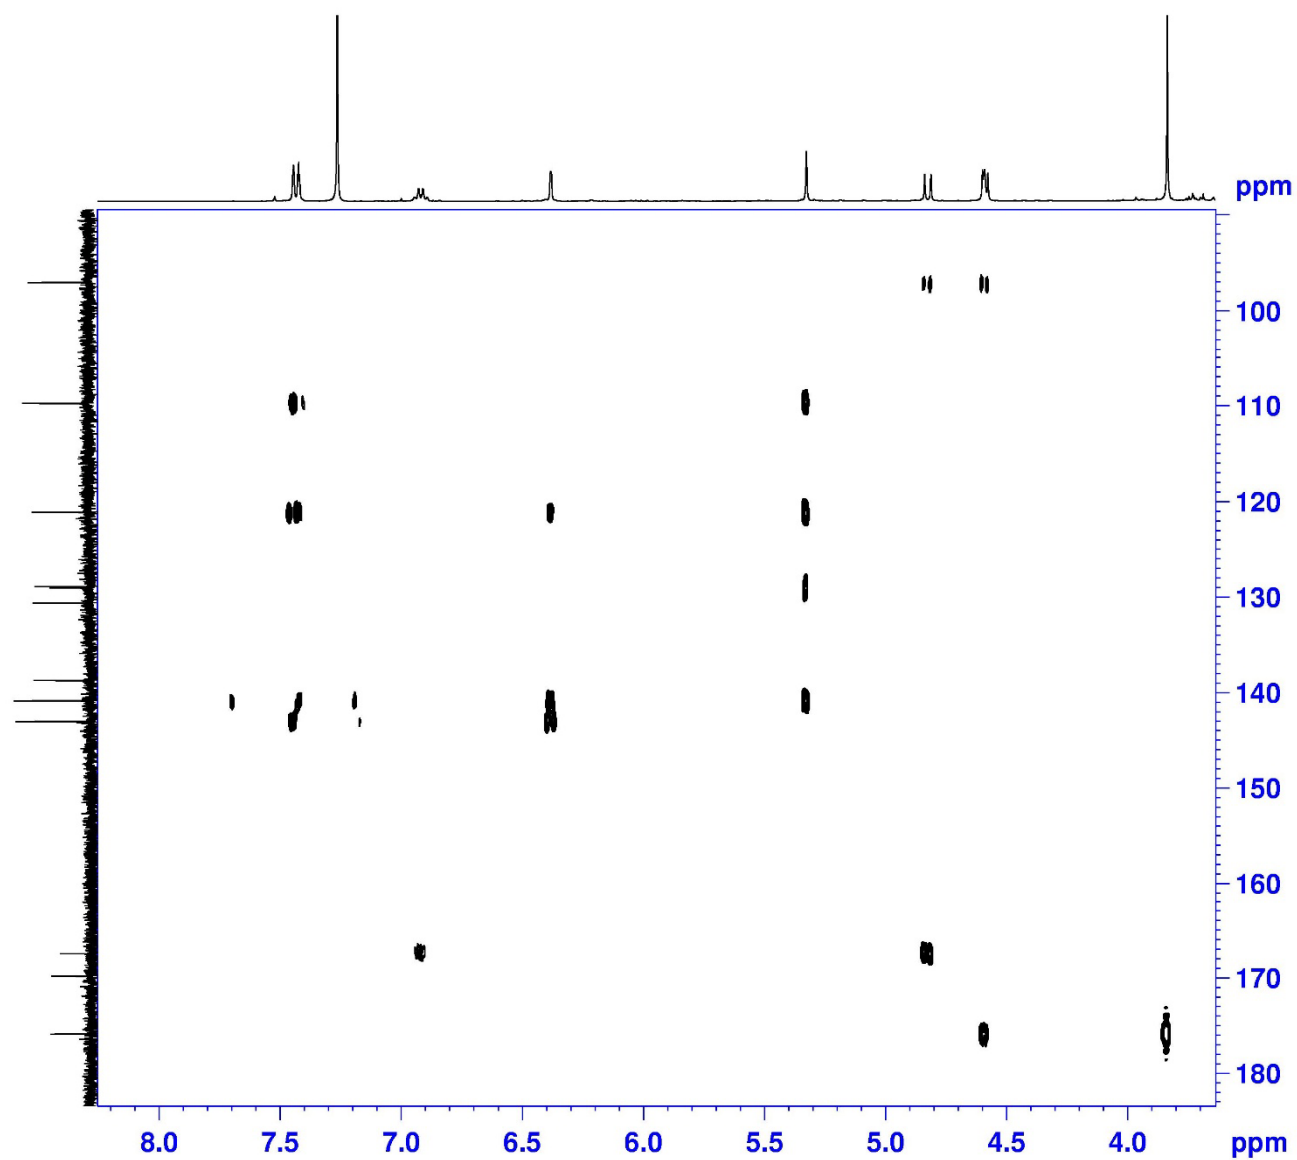



HMBC (400 MHz) spectrum of compound **4** in CDCl<sub>3</sub>

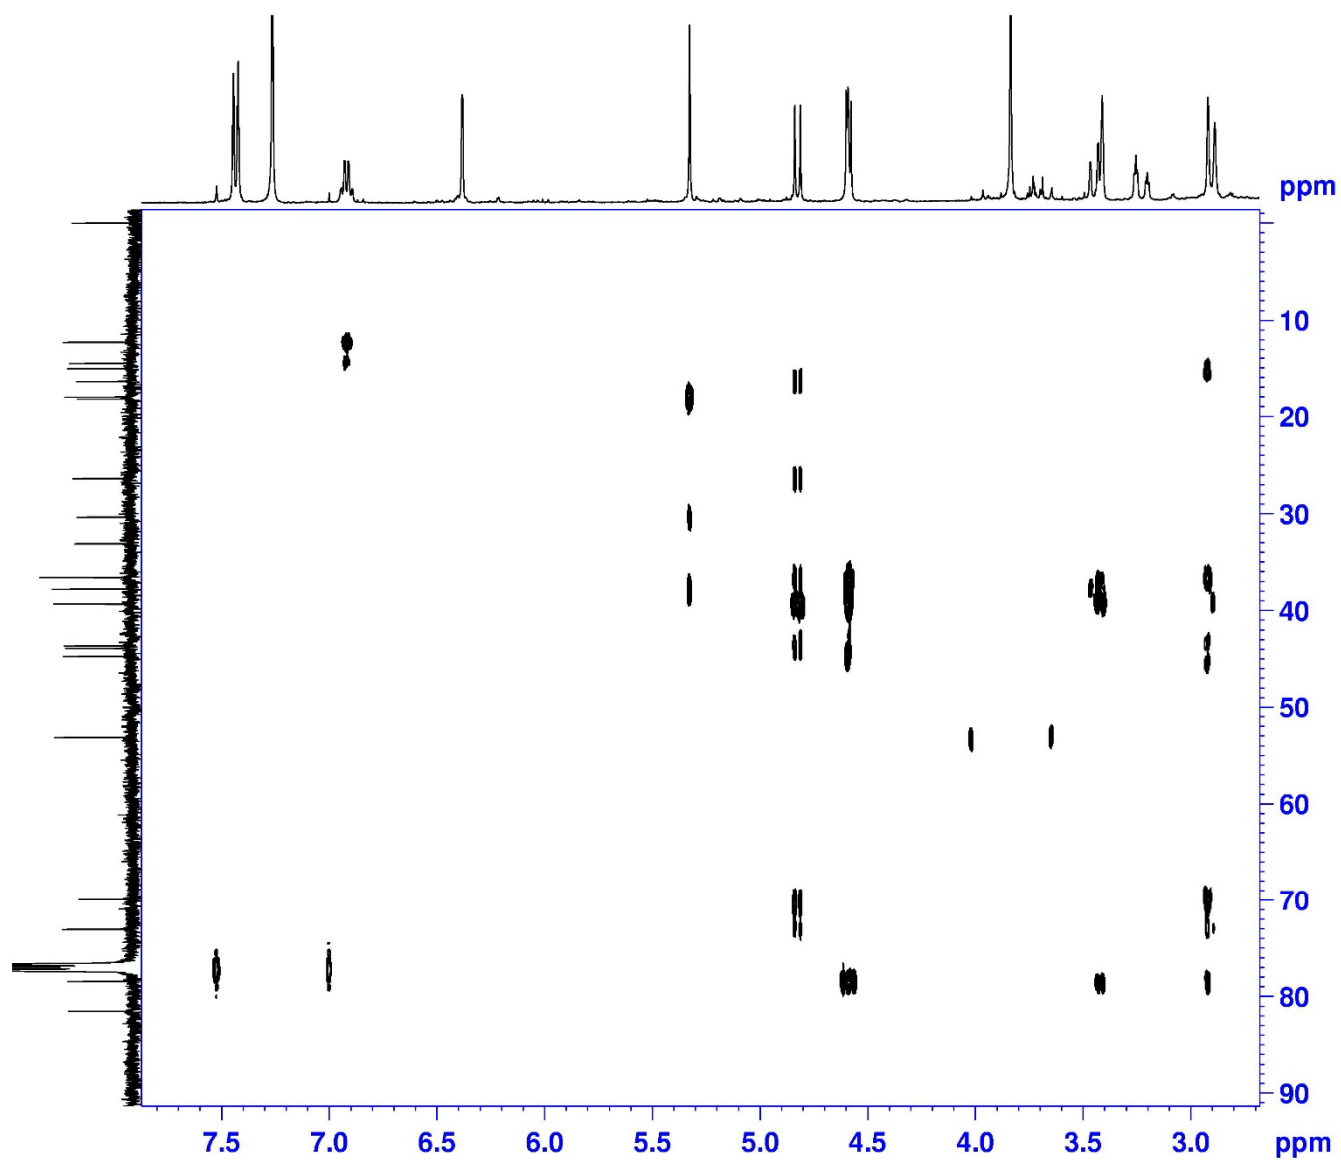

HMBC (400 MHz) spectrum of compound **4** in  $\text{CDCl}_3$

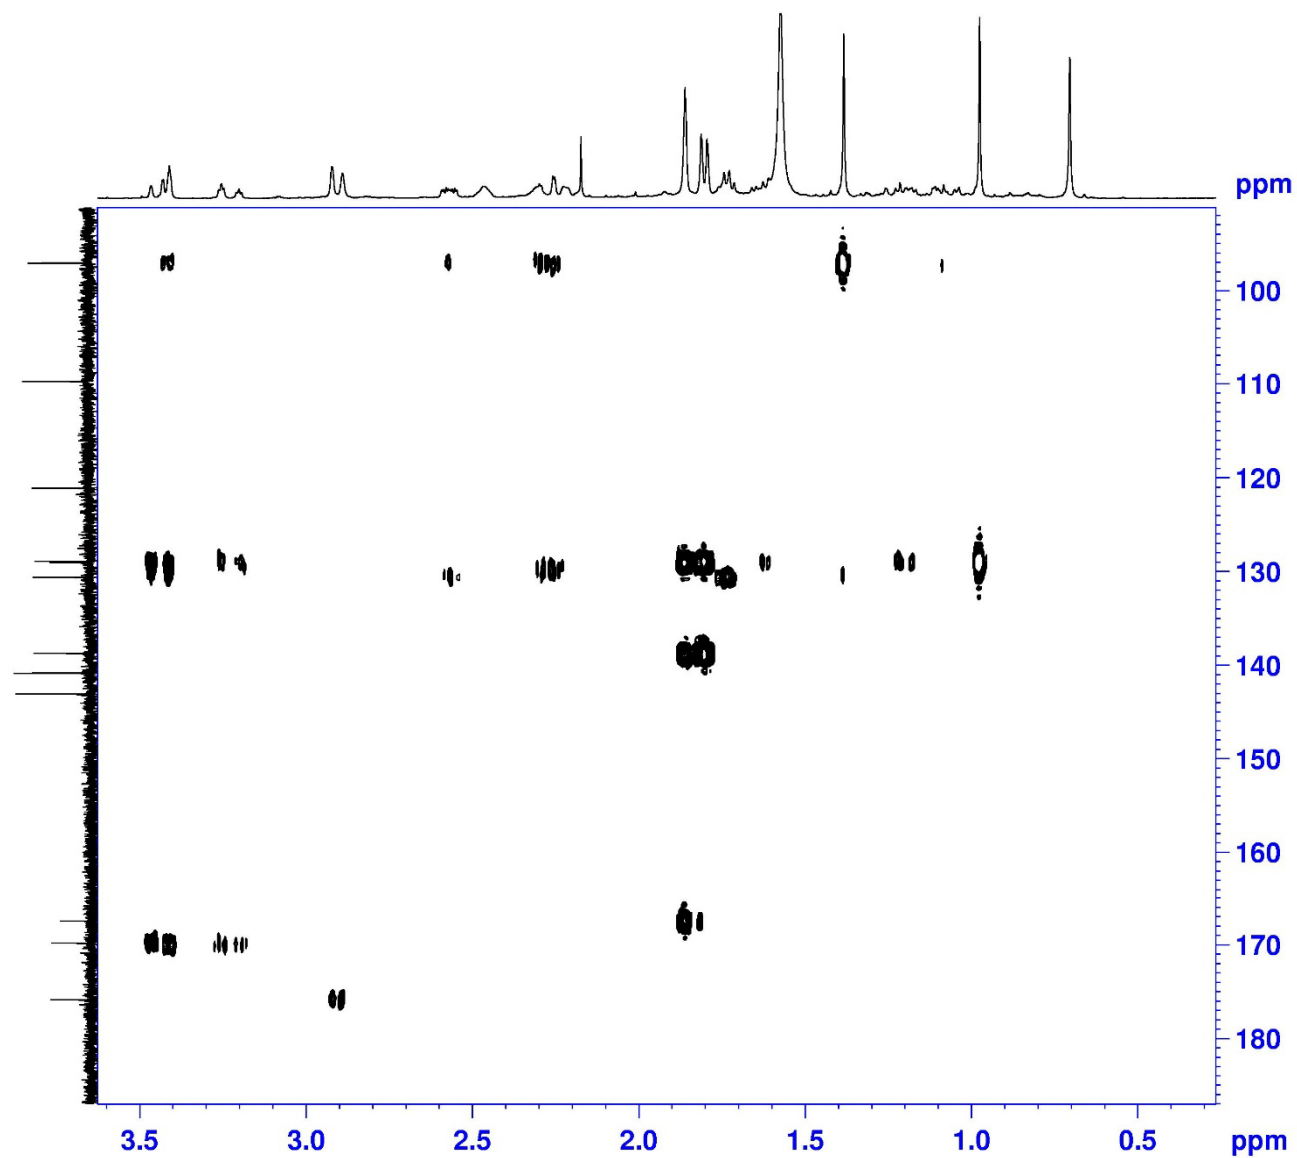

HMBC (400 MHz) spectrum of compound **4** in CDCl<sub>3</sub>

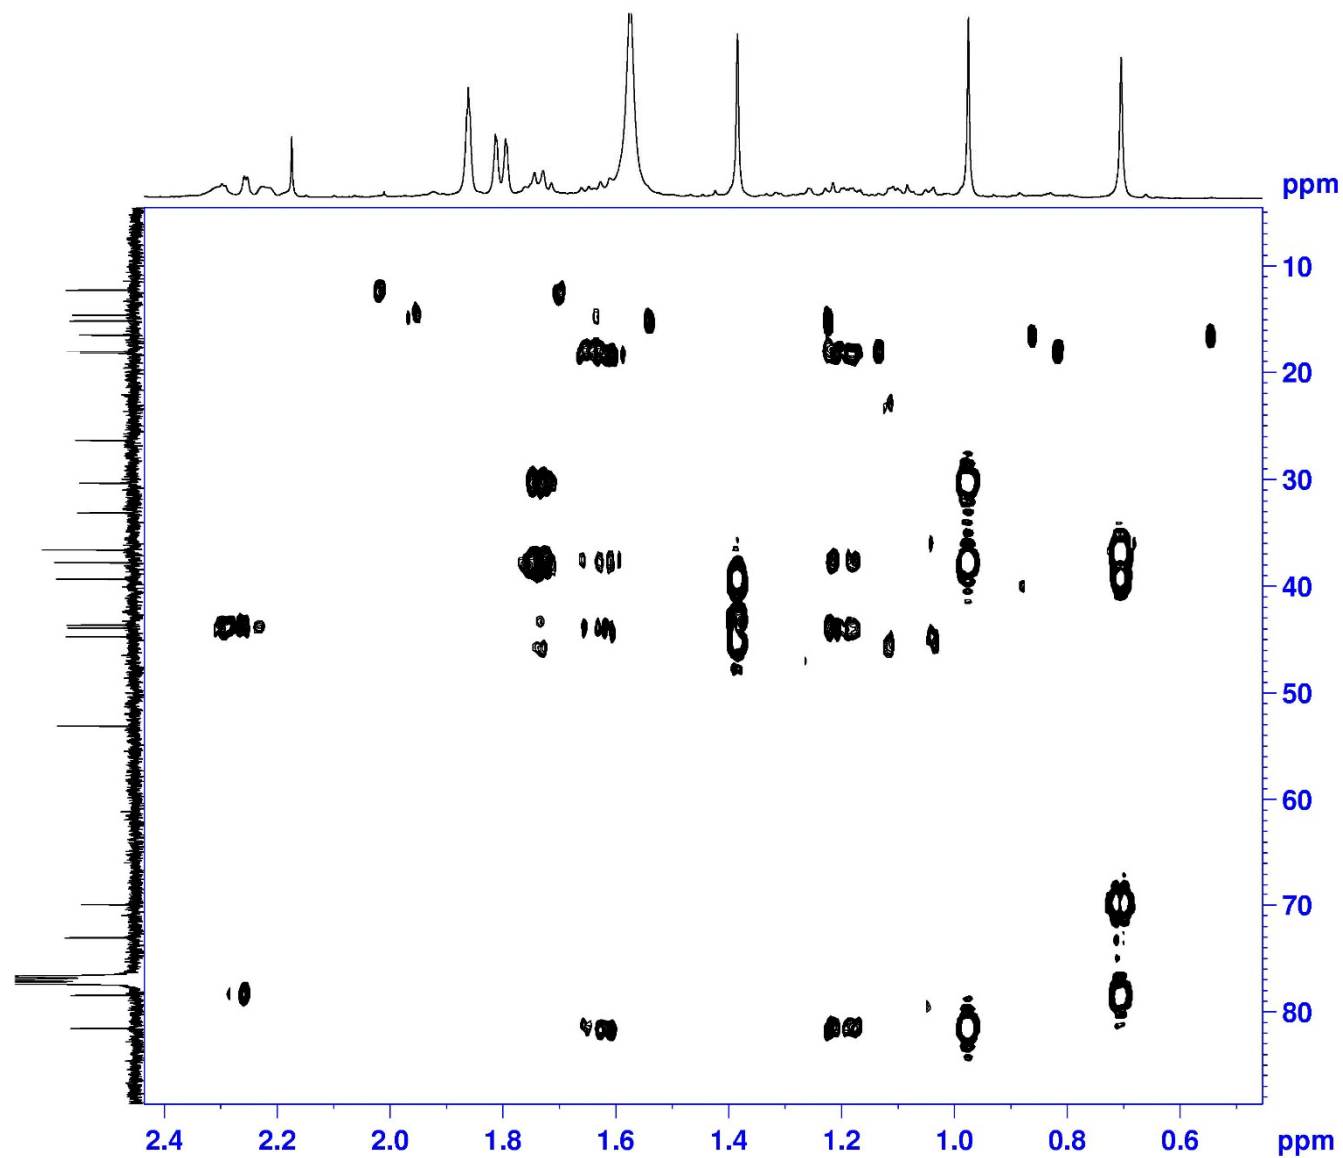

# NOESY (400 MHz) spectrum of compound **4** in $\text{CDCl}_3$

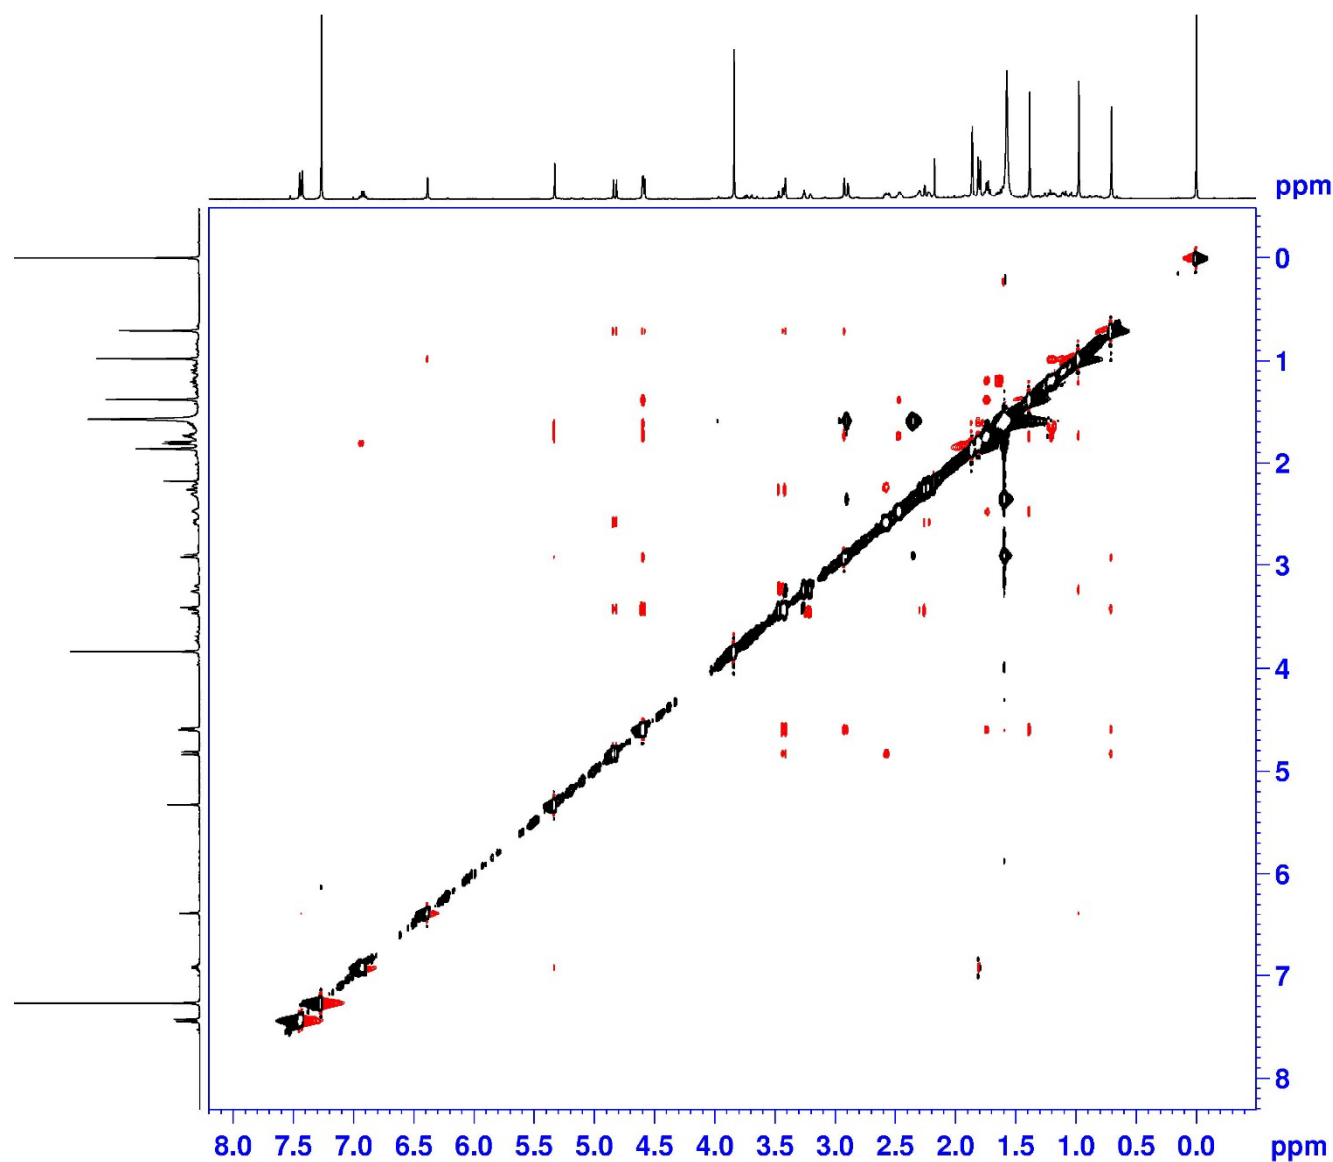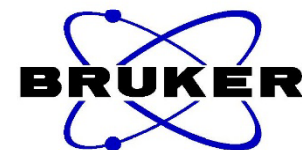

NAME ZXP-R-17-2-1-2  
EXPNO 7  
PROCNO 1  
Date\_ 20180707  
Time 22.21  
INSTRUM spect  
PROBHD 5 mm CPPBBO BB  
PULPROG noesygpphpp  
TD 2048  
SOLVENT  $\text{CDCl}_3$   
NS 16  
DS 32  
SWH 4000.000 Hz  
FIDRES 1.953125 Hz  
AQ 0.2560500 sec  
RG 208.5  
DW 125.000 usec  
DE 10.00 usec  
TE 297.0 K  
D0 0.00011036 sec  
D1 1.99385595 sec  
D8 0.30000001 sec  
D11 0.03000000 sec  
D12 0.00002000 sec  
D16 0.00020000 sec  
INO 0.00025000 sec

===== CHANNEL f1 =====  
SFO1 400.1318006 MHz  
NUC1  $^1\text{H}$   
P1 11.50 usec  
P2 23.00 usec  
P17 2500.00 usec  
ND0 1  
TD 256  
SFO1 400.1318 MHz  
FIDRES 15.625000 Hz  
SW 9.997 ppm  
FnMODE States-TPPI  
SI 1024  
SF 400.1300057 MHz  
WDW QSINE  
SSB 2  
LB 0.00 Hz  
GB 0  
PC 1.00  
SI 1024  
MC2 States-TPPI  
SF 400.1300066 MHz  
WDW QSINE  
SSB 2  
LB 0.00 Hz  
GB 0

NOESY (400 MHz) spectrum of compound **4** in  $\text{CDCl}_3$

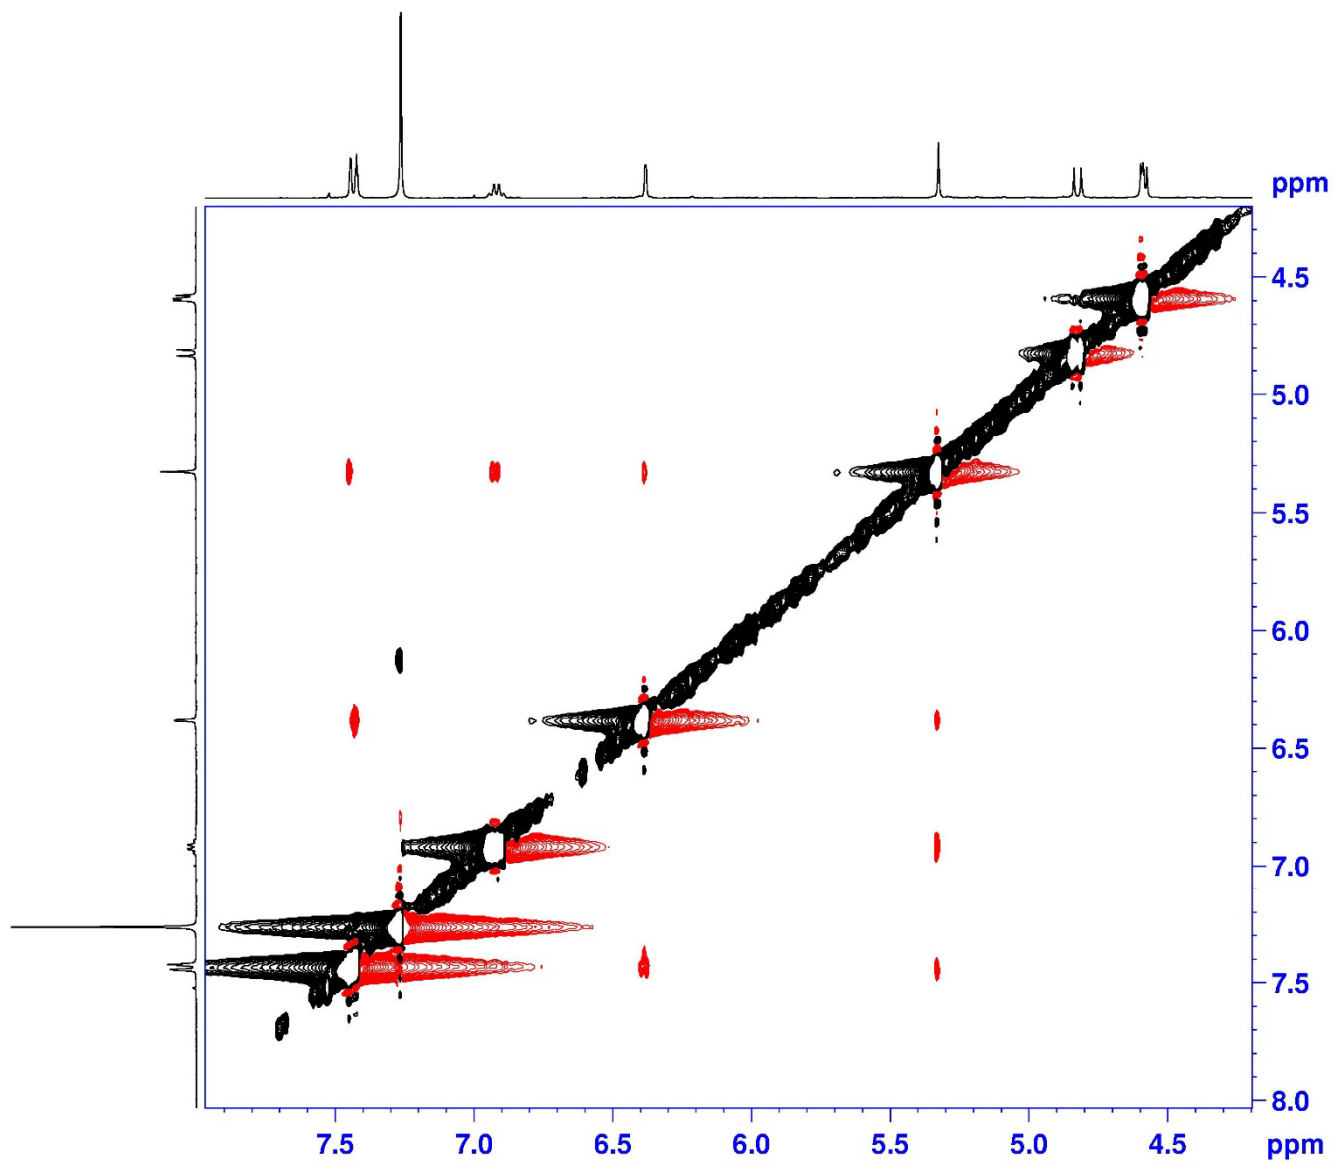

NOESY (400 MHz) spectrum of compound **4** in  $\text{CDCl}_3$

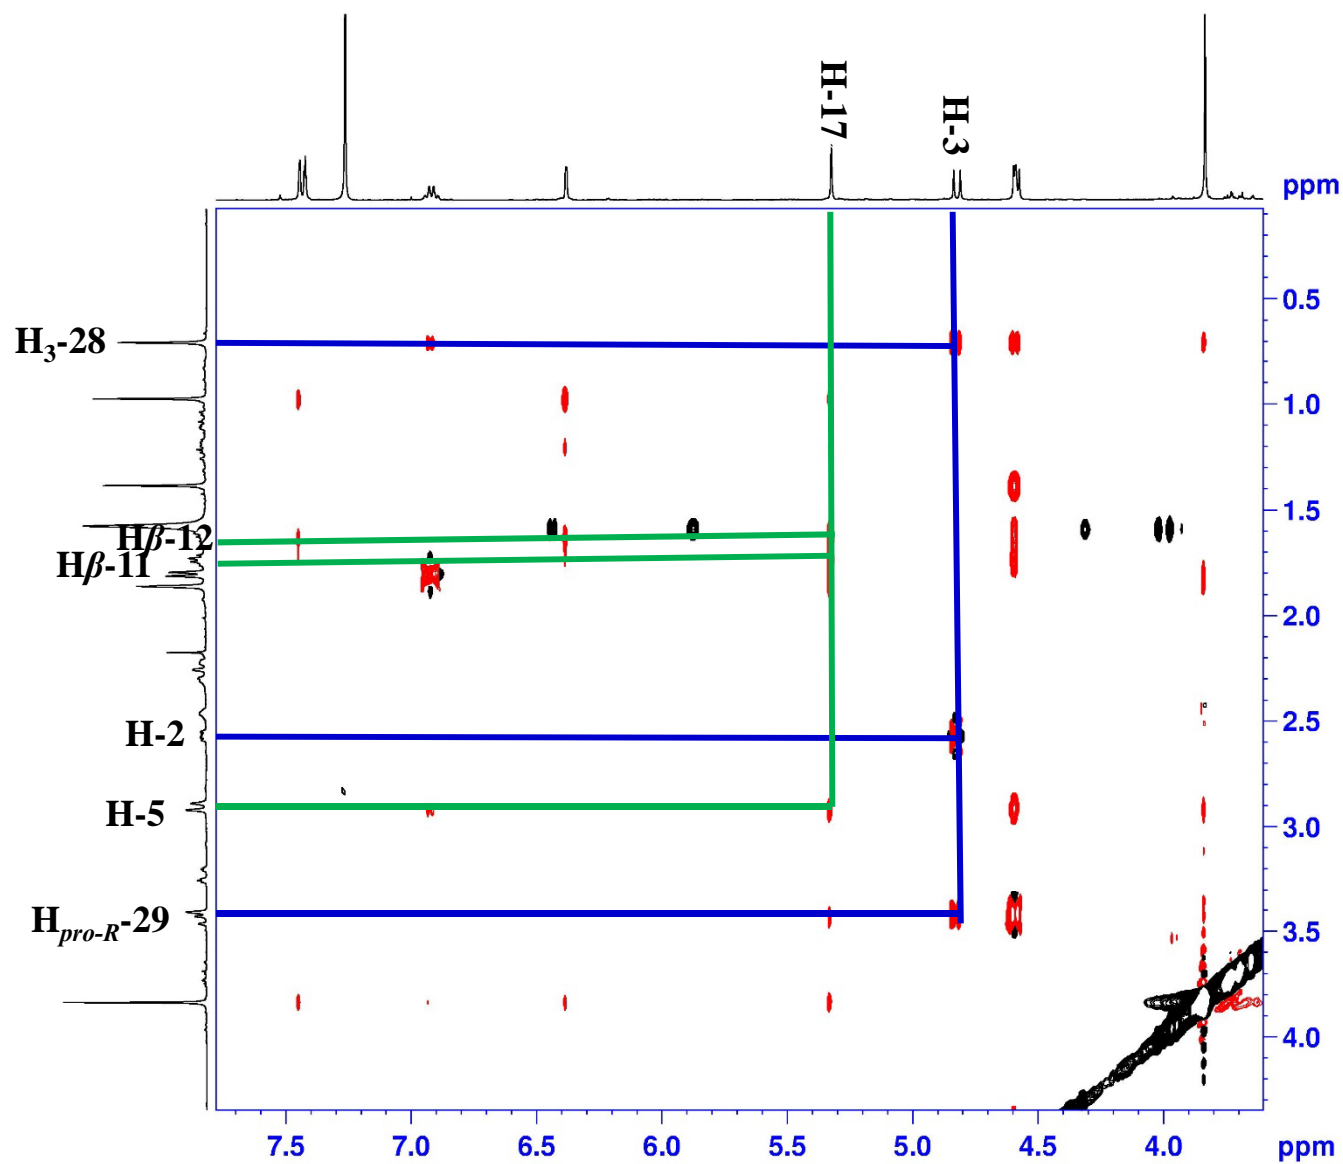

NOESY (400 MHz) spectrum of compound **4** in  $\text{CDCl}_3$

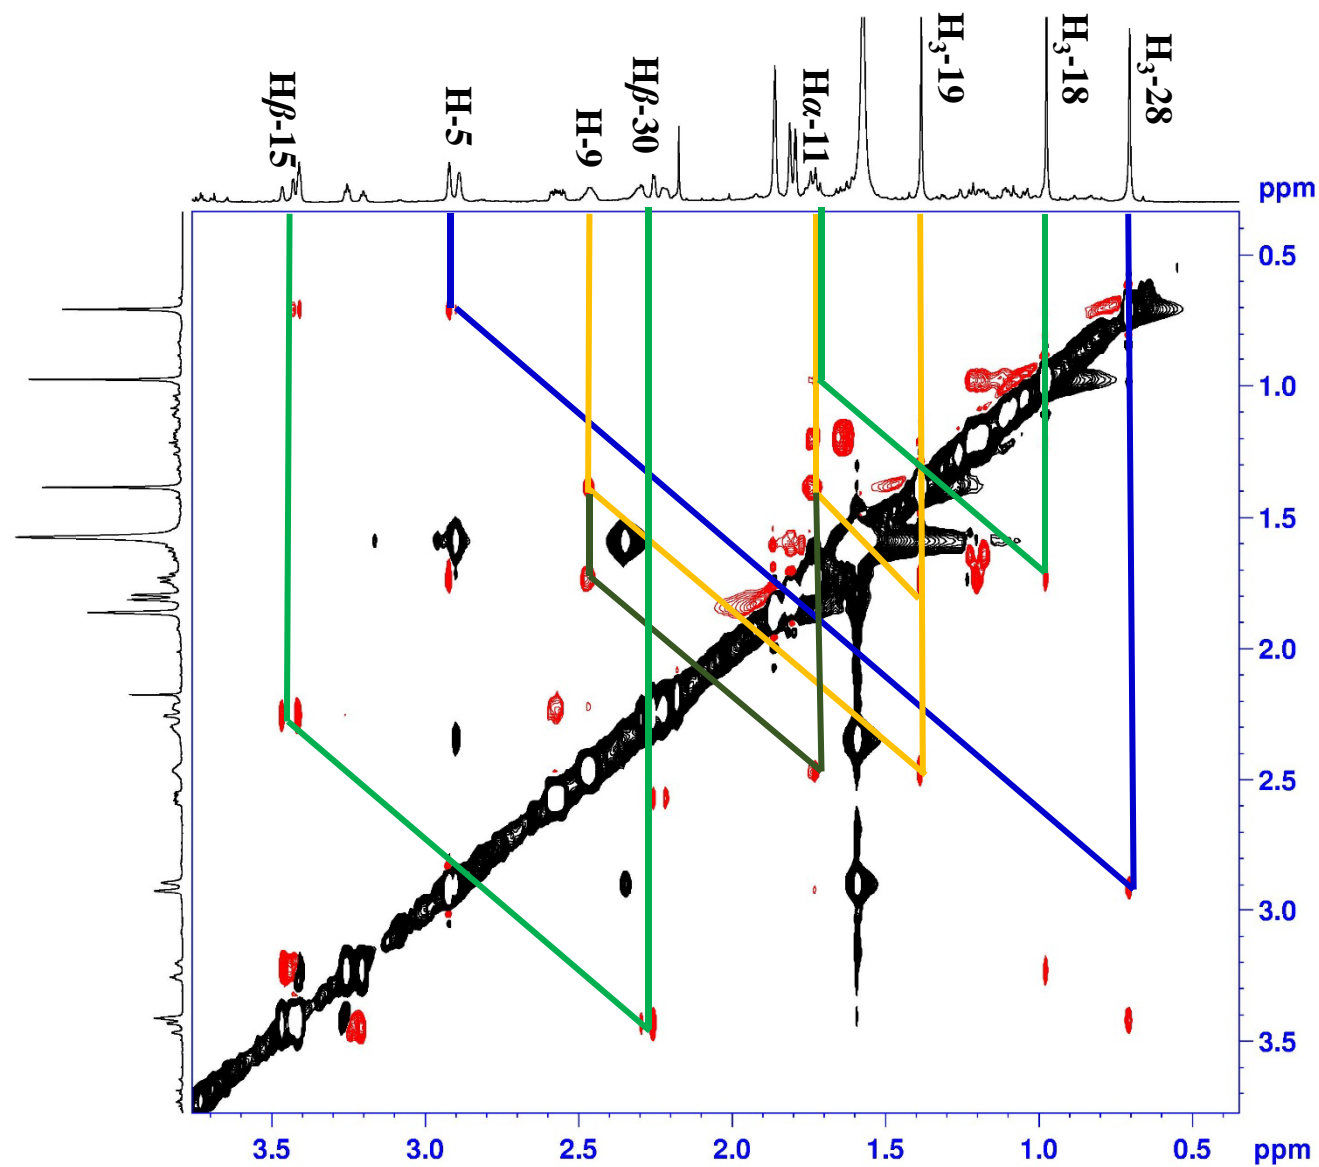

# HR-ESIMS for compound 5

## Generic Display Report

### Analysis Info

Analysis Name D:\Data\MS\data\201805\liwanshan\_P-18-2-1\_pos\_37\_01\_4667.d  
Method LC\_Direct Infusion\_pos\_100-1000mz.m  
Sample Name liwanshan\_P-18-2-1\_pos  
Comment

Acquisition Date 5/4/2018 11:44:10 AM

Operator SCSIO  
Instrument maXis

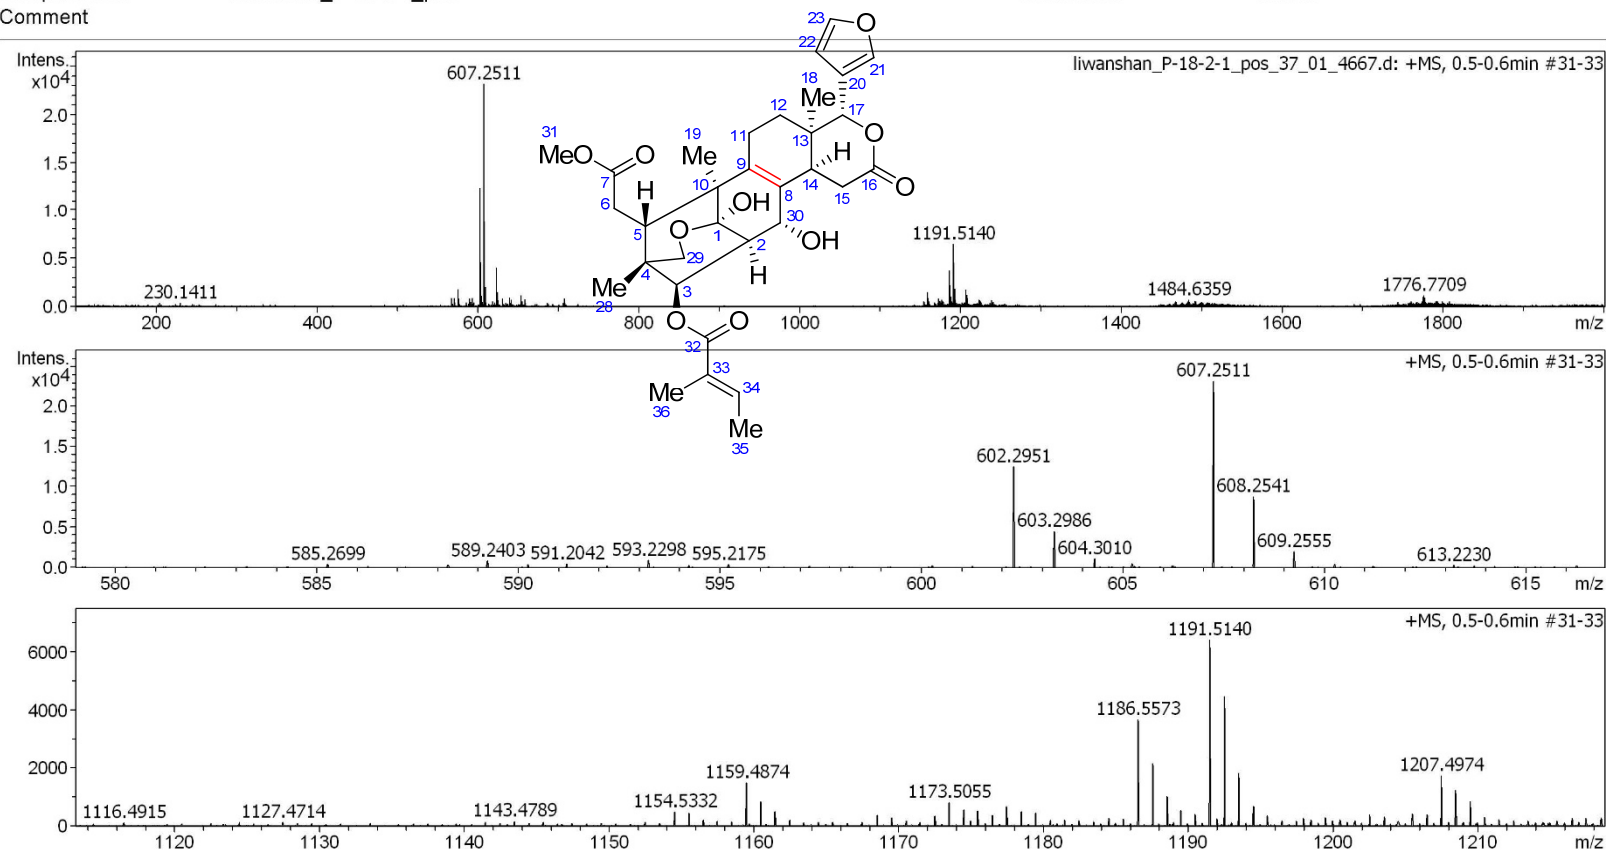



# HR-ESIMS for compound 5

## Mass Spectrum SmartFormula Report

### Analysis Info

Analysis Name D:\Data\MS\data\201805\liwanshan\_P-18-2-1\_pos\_37\_01\_4667.d  
 Method LC\_Direct Infusion\_pos\_100-1000mz.m  
 Sample Name liwanshan\_P-18-2-1\_pos  
 Comment

Acquisition Date 5/4/2018 11:44:10 AM  
 Operator SCSIO  
 Instrument maXis 255552.00029

### Acquisition Parameter

|             |          |                      |          |                  |           |
|-------------|----------|----------------------|----------|------------------|-----------|
| Source Type | ESI      | Ion Polarity         | Positive | Set Nebulizer    | 0.4 Bar   |
| Focus       | Active   | Set Capillary        | 4500 V   | Set Dry Heater   | 180 °C    |
| Scan Begin  | 100 m/z  | Set End Plate Offset | -500 V   | Set Dry Gas      | 4.0 l/min |
| Scan End    | 2000 m/z | Set Charging Voltage | 0 V      | Set Divert Valve | Waste     |
|             |          | Set Corona           | 0 nA     | Set APCI Heater  | 0 °C      |

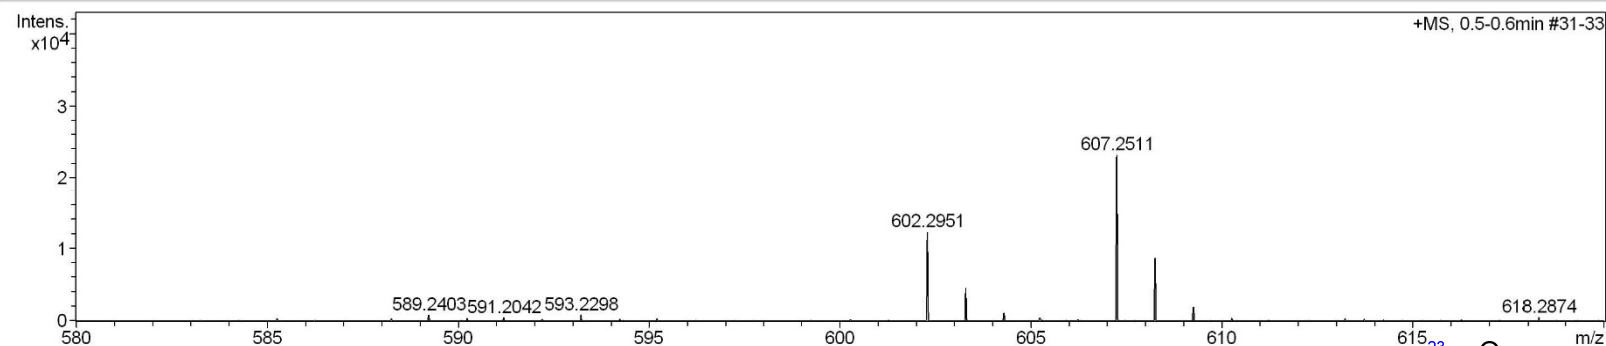

| Meas. m/z | # | Ion Formula | Score  | m/z       | err [ppm] | err [mDa] | mSigma | rdb  | e <sup>-</sup> Conf | N-Rule |
|-----------|---|-------------|--------|-----------|-----------|-----------|--------|------|---------------------|--------|
| 585.2699  | 1 | C32H41O10   | 100.00 | 585.2694  | -0.9      | -0.5      | 371.8  | 12.5 | even                | ok     |
| 602.2951  | 1 | C32H44NO10  | 100.00 | 602.2960  | -1.4      | -0.9      | 4.6    | 11.5 | even                | ok     |
| 607.2511  | 1 | C32H40NaO10 | 100.00 | 607.2514  | 0.4       | 0.2       | 12.7   | 12.5 | even                | ok     |
| 1191.5140 | 1 | C64H80NaO20 | 100.00 | 1191.5135 | 0.4       | 0.5       | 13.9   | 24.5 | even                | ok     |

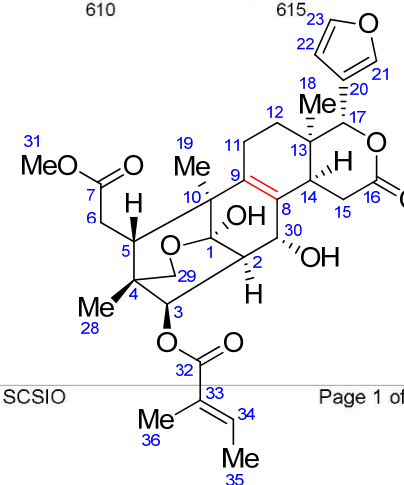

liwanshan\_P-18-2-1\_pos\_37\_01\_4667.d  
 Bruker Compass DataAnalysis 4.1

printed: 5/4/2018 3:39:17 PM

by: SCSIO

Page 1 of 1

S115

$^1\text{H}$  NMR (400 MHz) spectrum of compound **5** in  $\text{CDCl}_3$

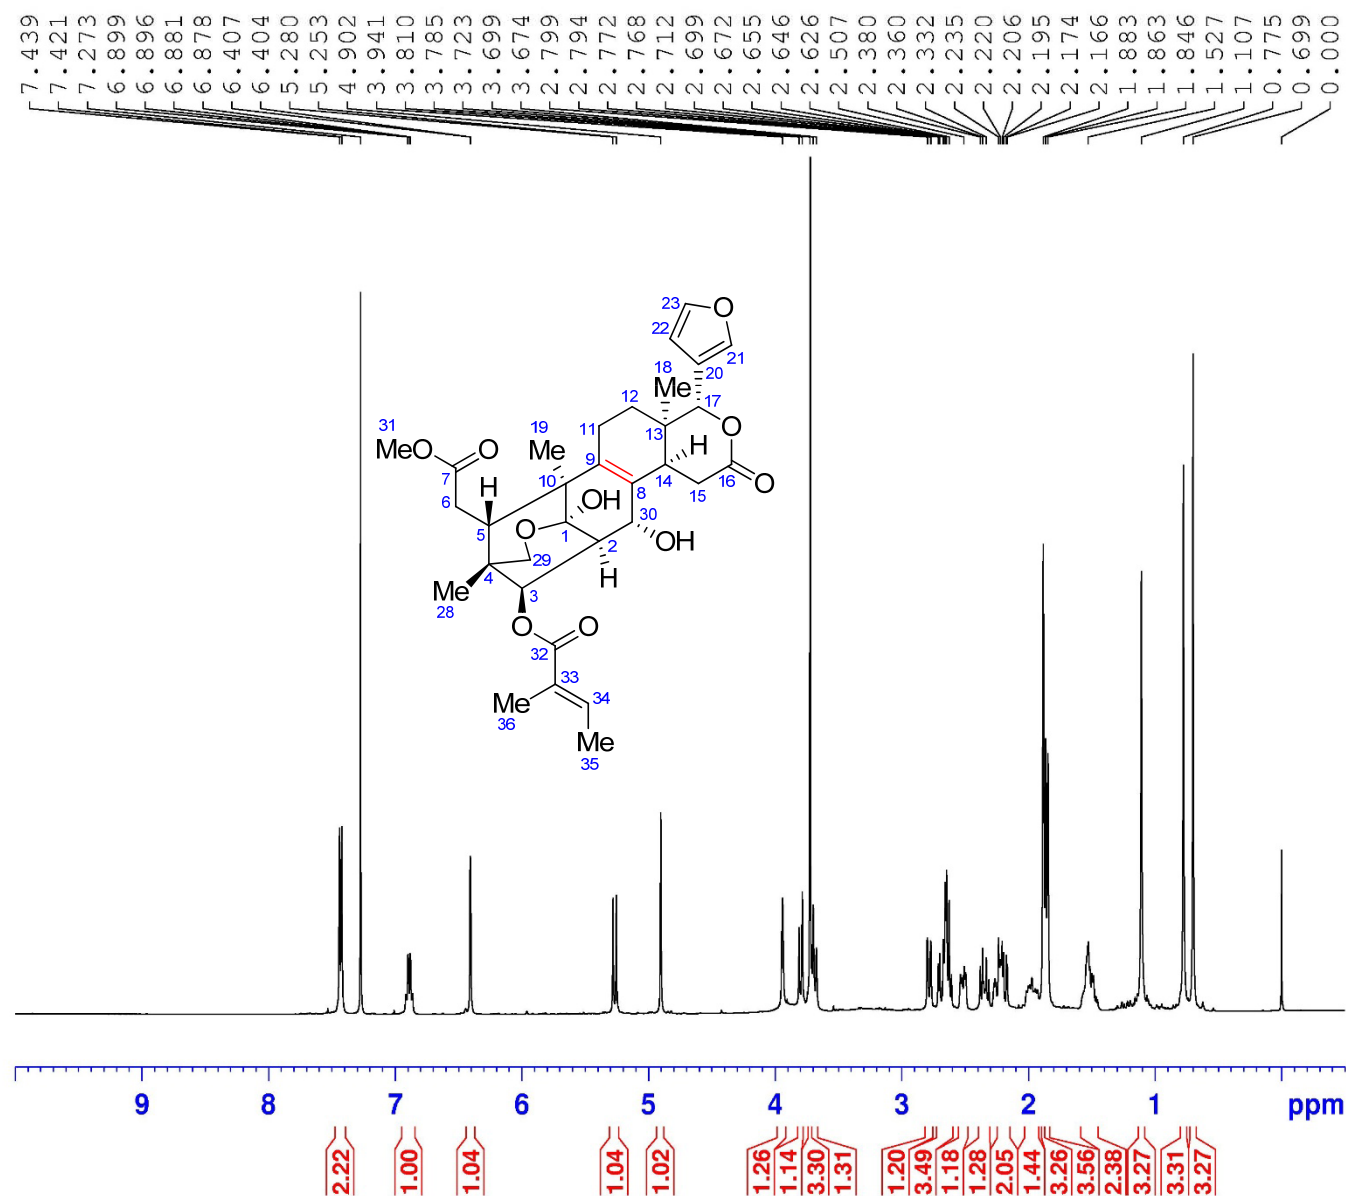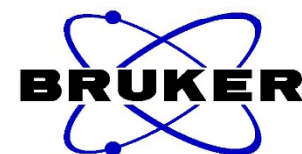

```

NAME      ZXP-R-18-2-2-2  new
EXPNO     1
PROCNO    1
Date_     20171206
Time      22.34
INSTRUM   spect
PROBHD    5 mm CPPBBO BB
PULPROG   zg30
TD        65536
SOLVENT   CDCl3
NS         16
DS         2
SWH        8223.685 Hz
FIDRES     0.125483 Hz
AQ         3.9846387 sec
RG         85.34
DW         60.800 usec
DE         10.00 usec
TE         297.0 K
D1         1.00000000 sec
TD0        1
    
```

```

===== CHANNEL f1 =====
SF01      400.1324710 MHz
NUC1       1H
P1         11.50 usec
SI         65536
SF         400.1300045 MHz
WDW        EM
SSB        0
LB         0.30 Hz
GB         0
PC         1.00
    
```

$^1\text{H}$  NMR (400 MHz) spectrum of compound **5** in  $\text{CDCl}_3$

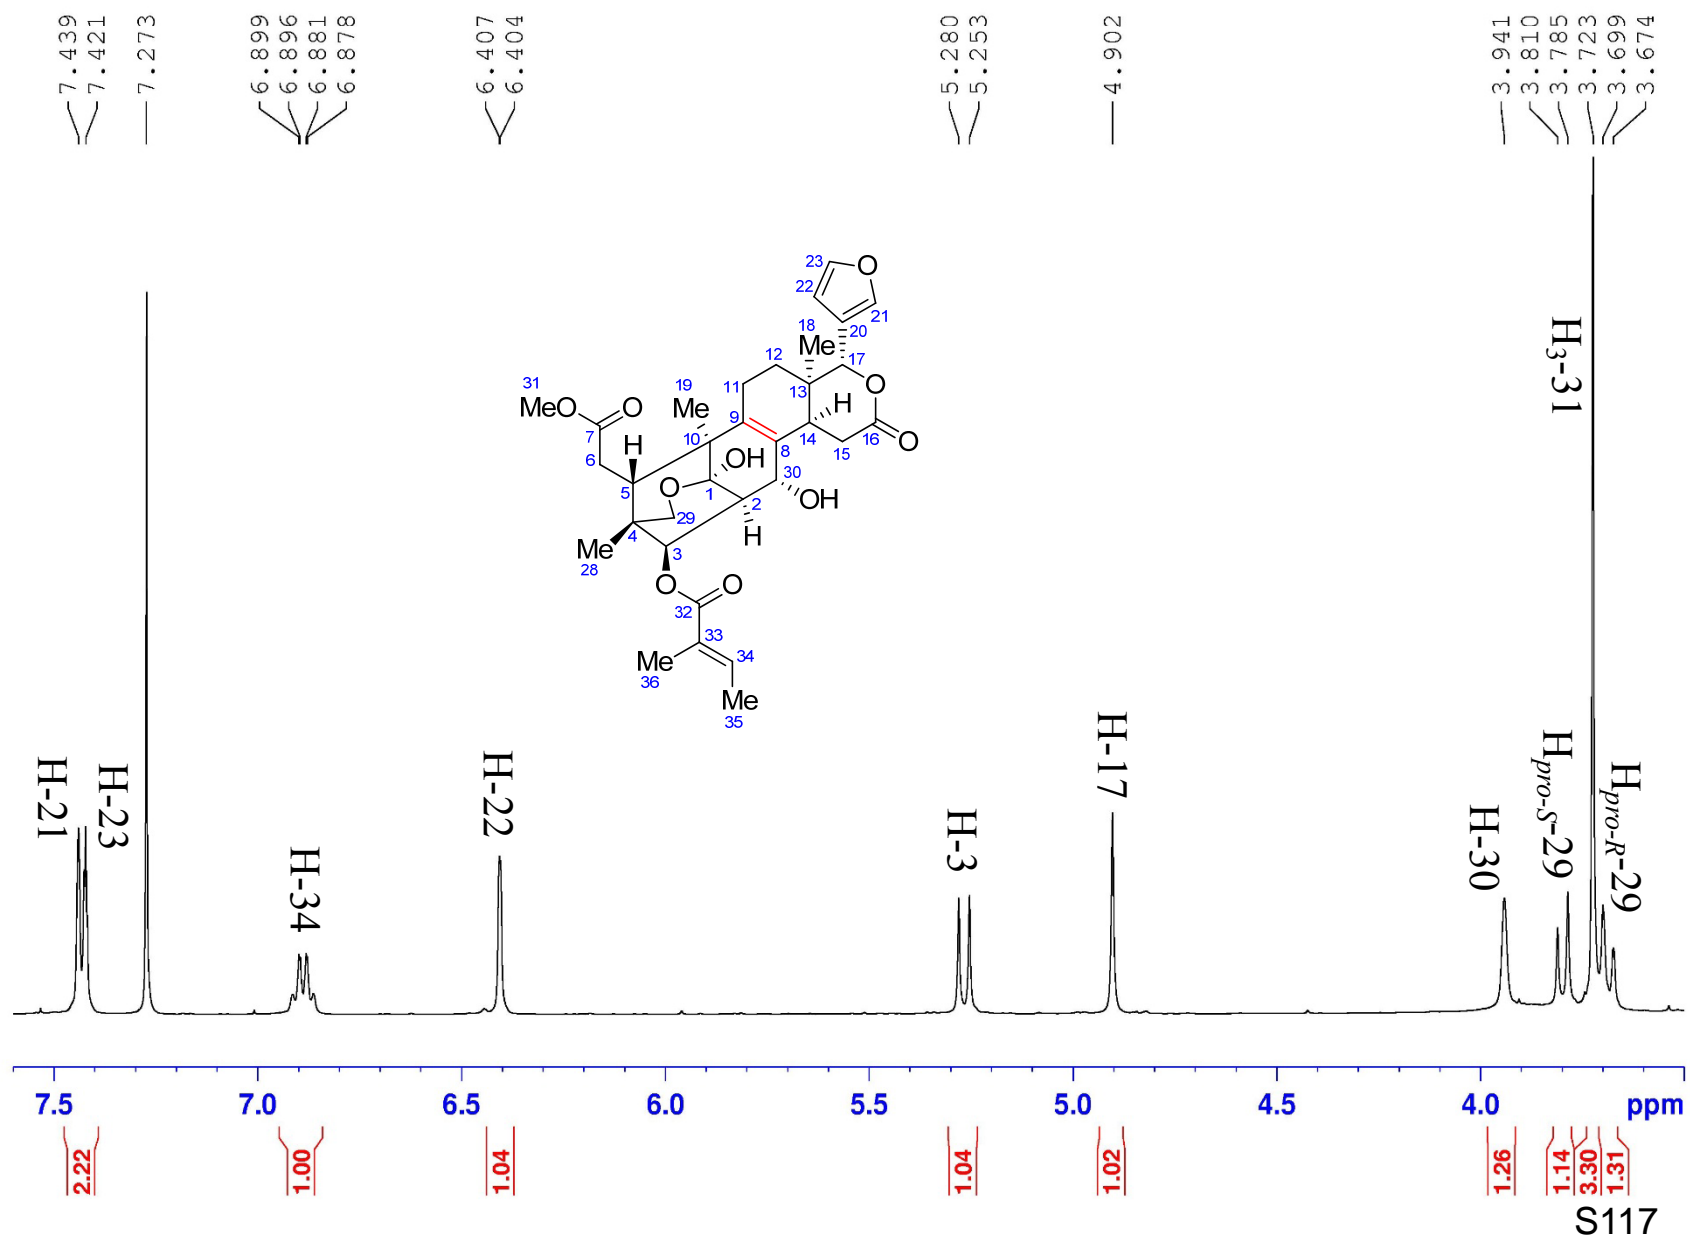

$^1\text{H}$  NMR (400 MHz) spectrum of compound **5** in  $\text{CDCl}_3$

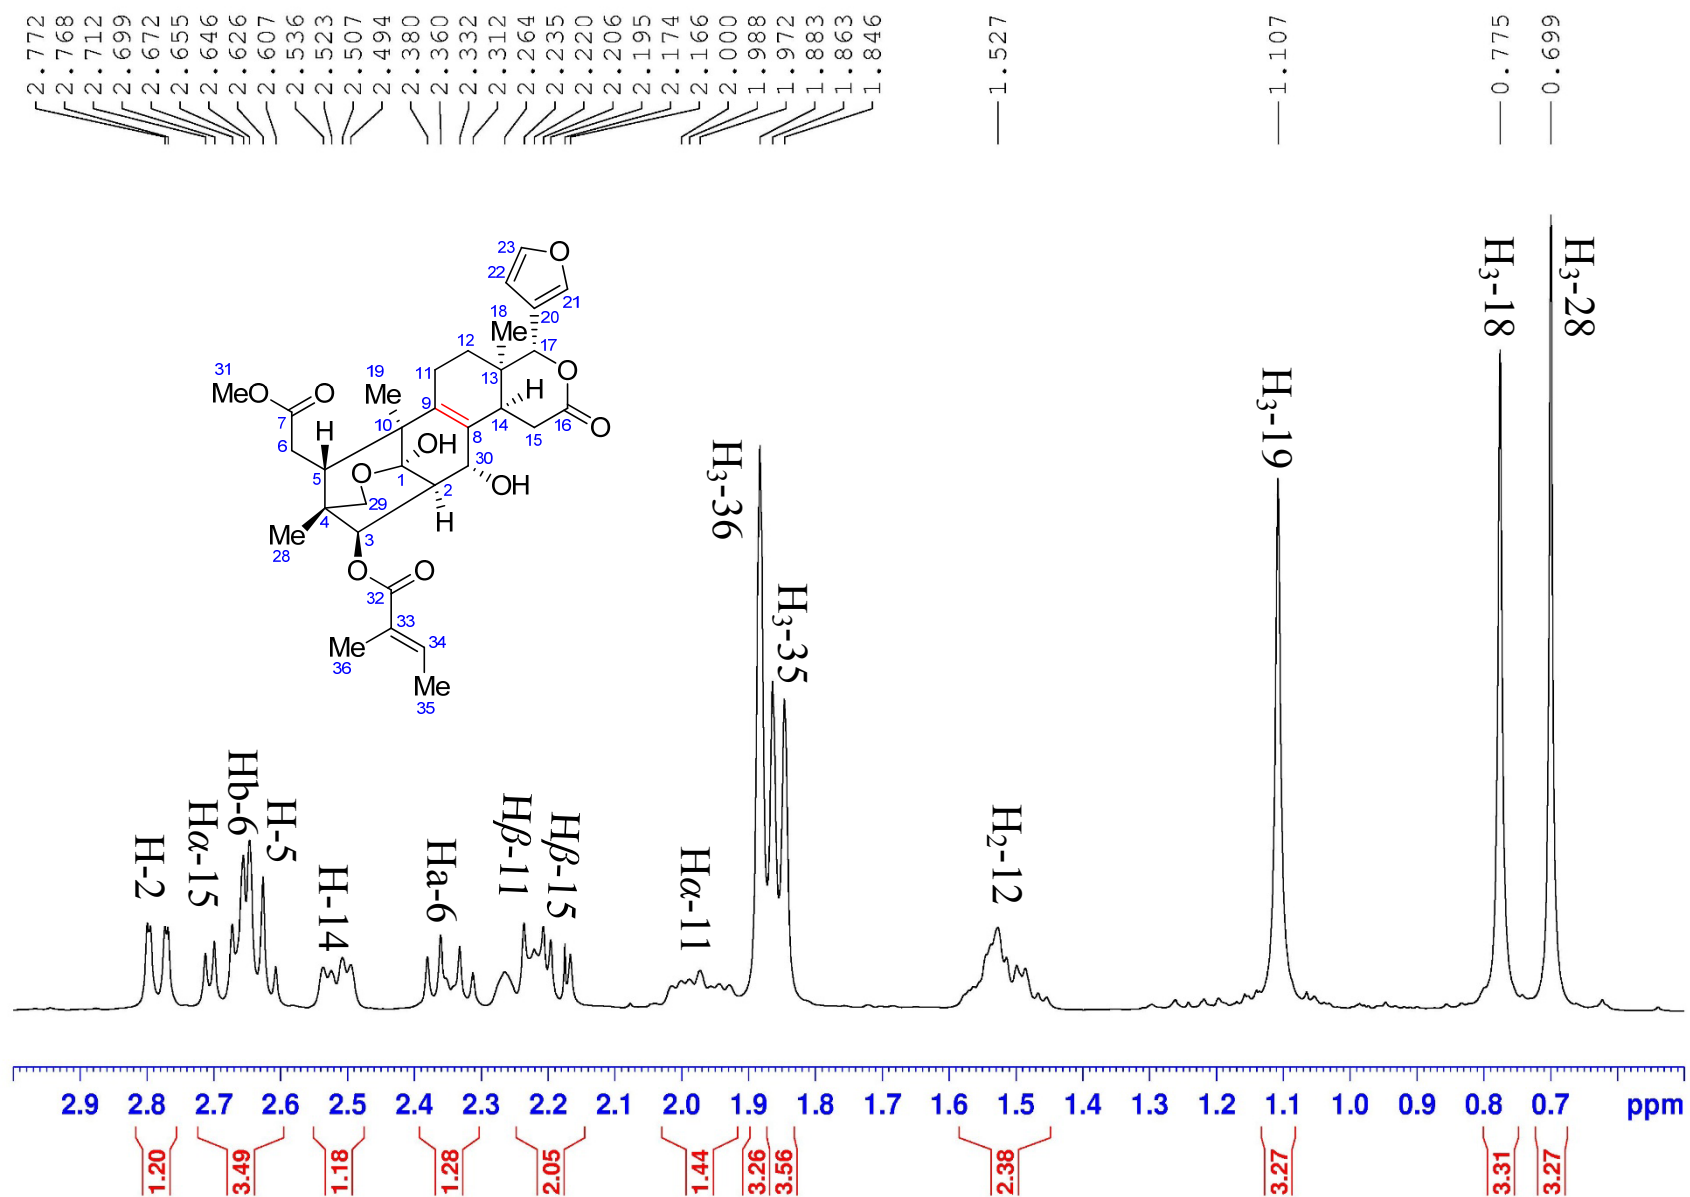

$^{13}\text{C}$  NMR (100 MHz) spectrum of compound **5** in  $\text{CDCl}_3$

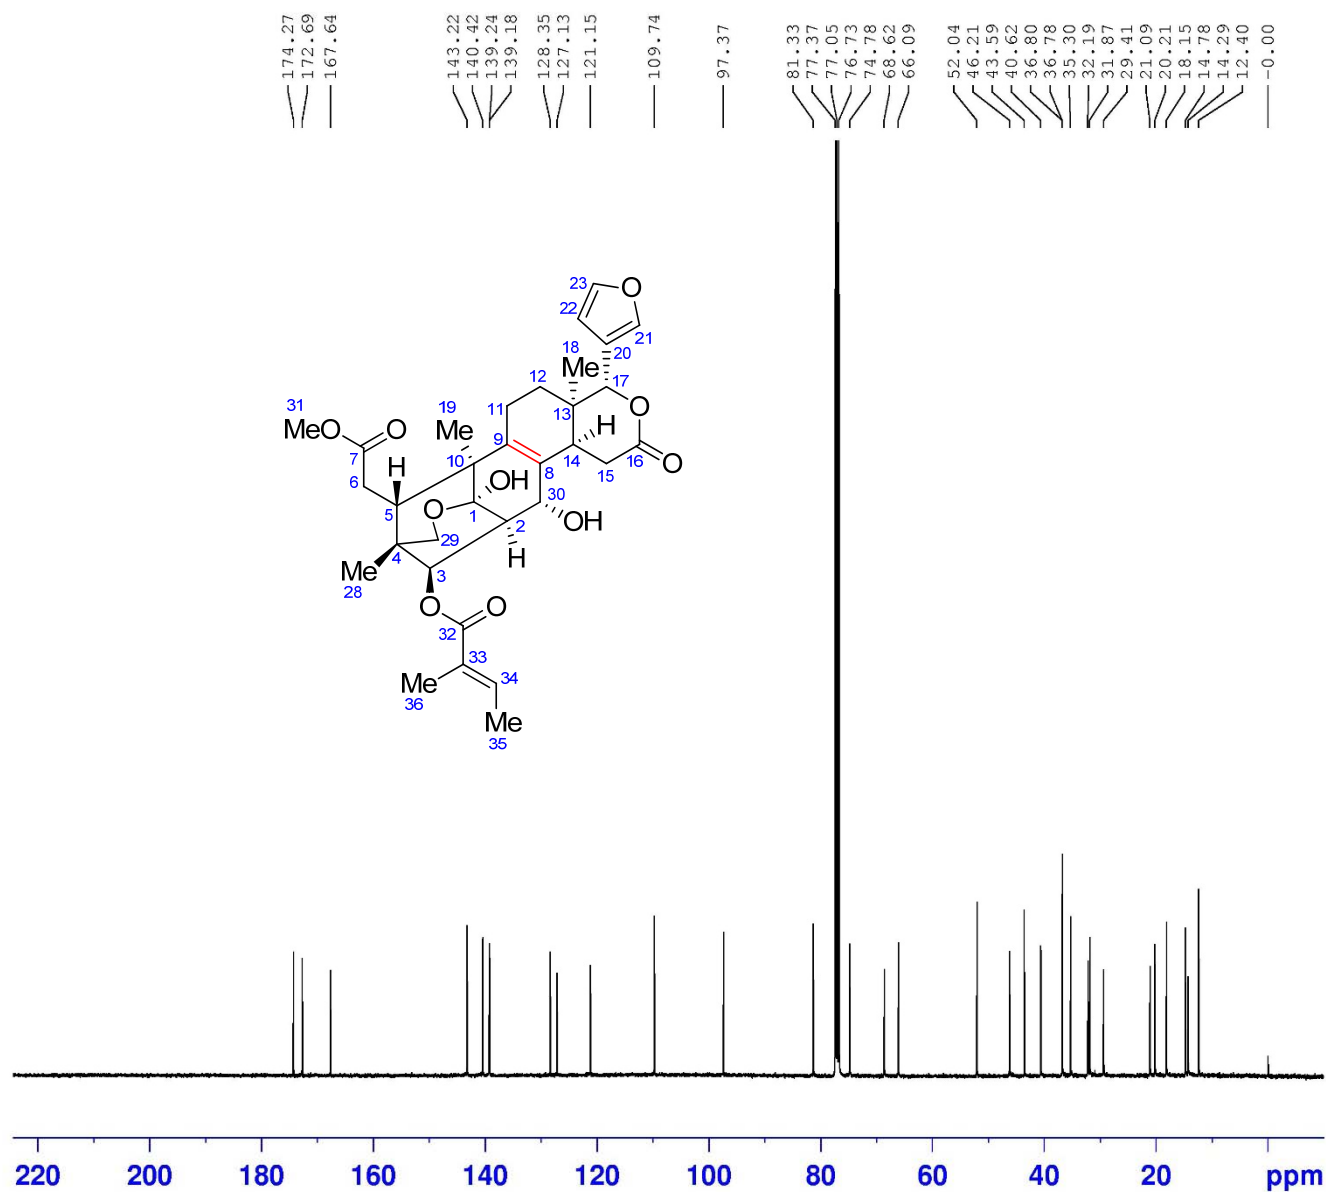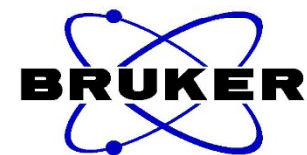

NAME ZXP-R-18-2-2-2 new  
 EXPNO 2  
 PROCNO 1  
 Date\_ 20171206  
 Time 23.34  
 INSTRUM spect  
 PROBHD 5 mm CPMBO BB  
 PULPROG zgpg30  
 TD 65536  
 SOLVENT  $\text{CDCl}_3$   
 NS 1024  
 DS 4  
 SWH 24038.461 Hz  
 FIDRES 0.366798 Hz  
 AQ 1.3631988 sec  
 RG 117.37  
 DW 20.800 usec  
 DE 18.00 usec  
 TE 297.0 K  
 D1 2.00000000 sec  
 D11 0.03000000 sec  
 TD0 1

===== CHANNEL f1 =====  
 SFO1 100.6233324 MHz  
 NUC1  $^{13}\text{C}$   
 P1 10.00 usec  
 SI 32768  
 SF 100.6127689 MHz  
 WDW EM  
 SSB 0  
 LB 1.00 Hz  
 GB 0  
 PC 1.40

$^{13}\text{C}$  NMR (100 MHz) spectrum of compound **5** in  $\text{CDCl}_3$

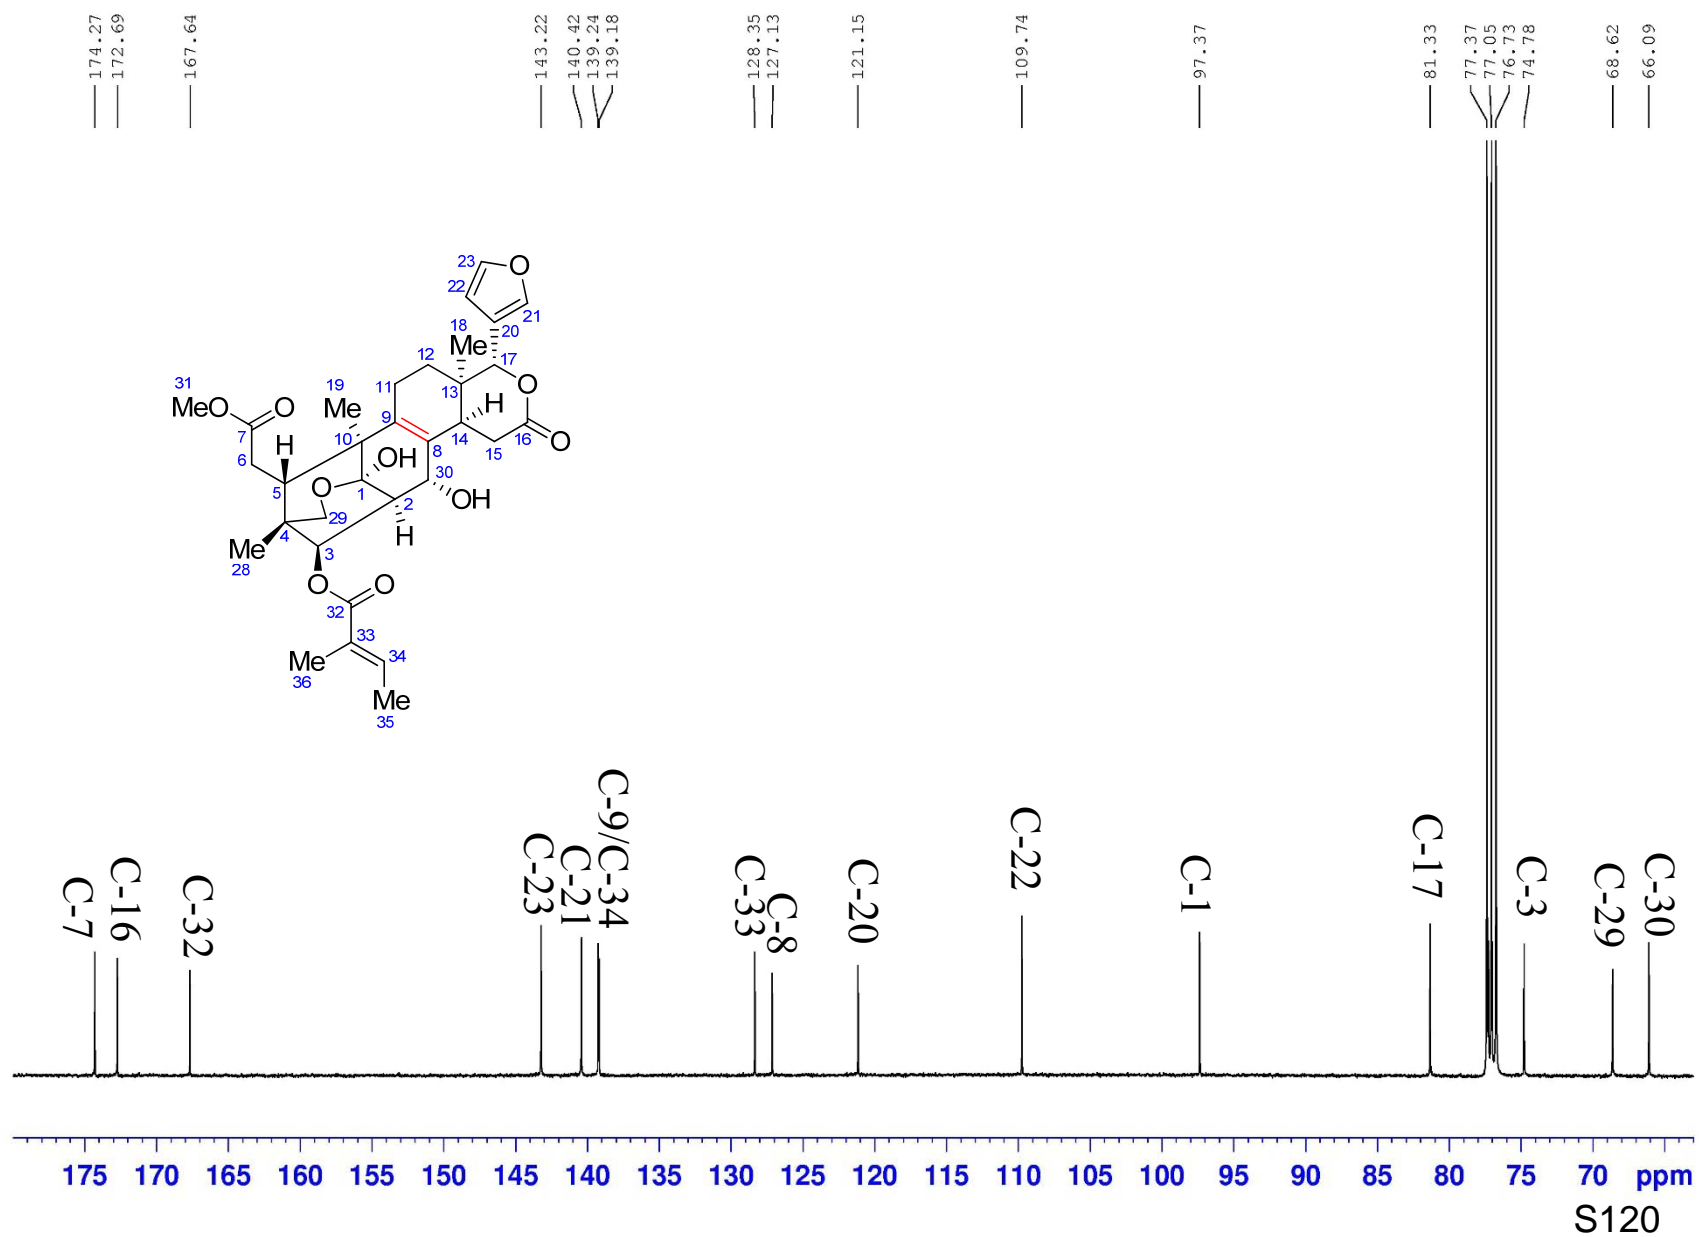

$^{13}\text{C}$  NMR (100 MHz) spectrum of compound **5** in  $\text{CDCl}_3$

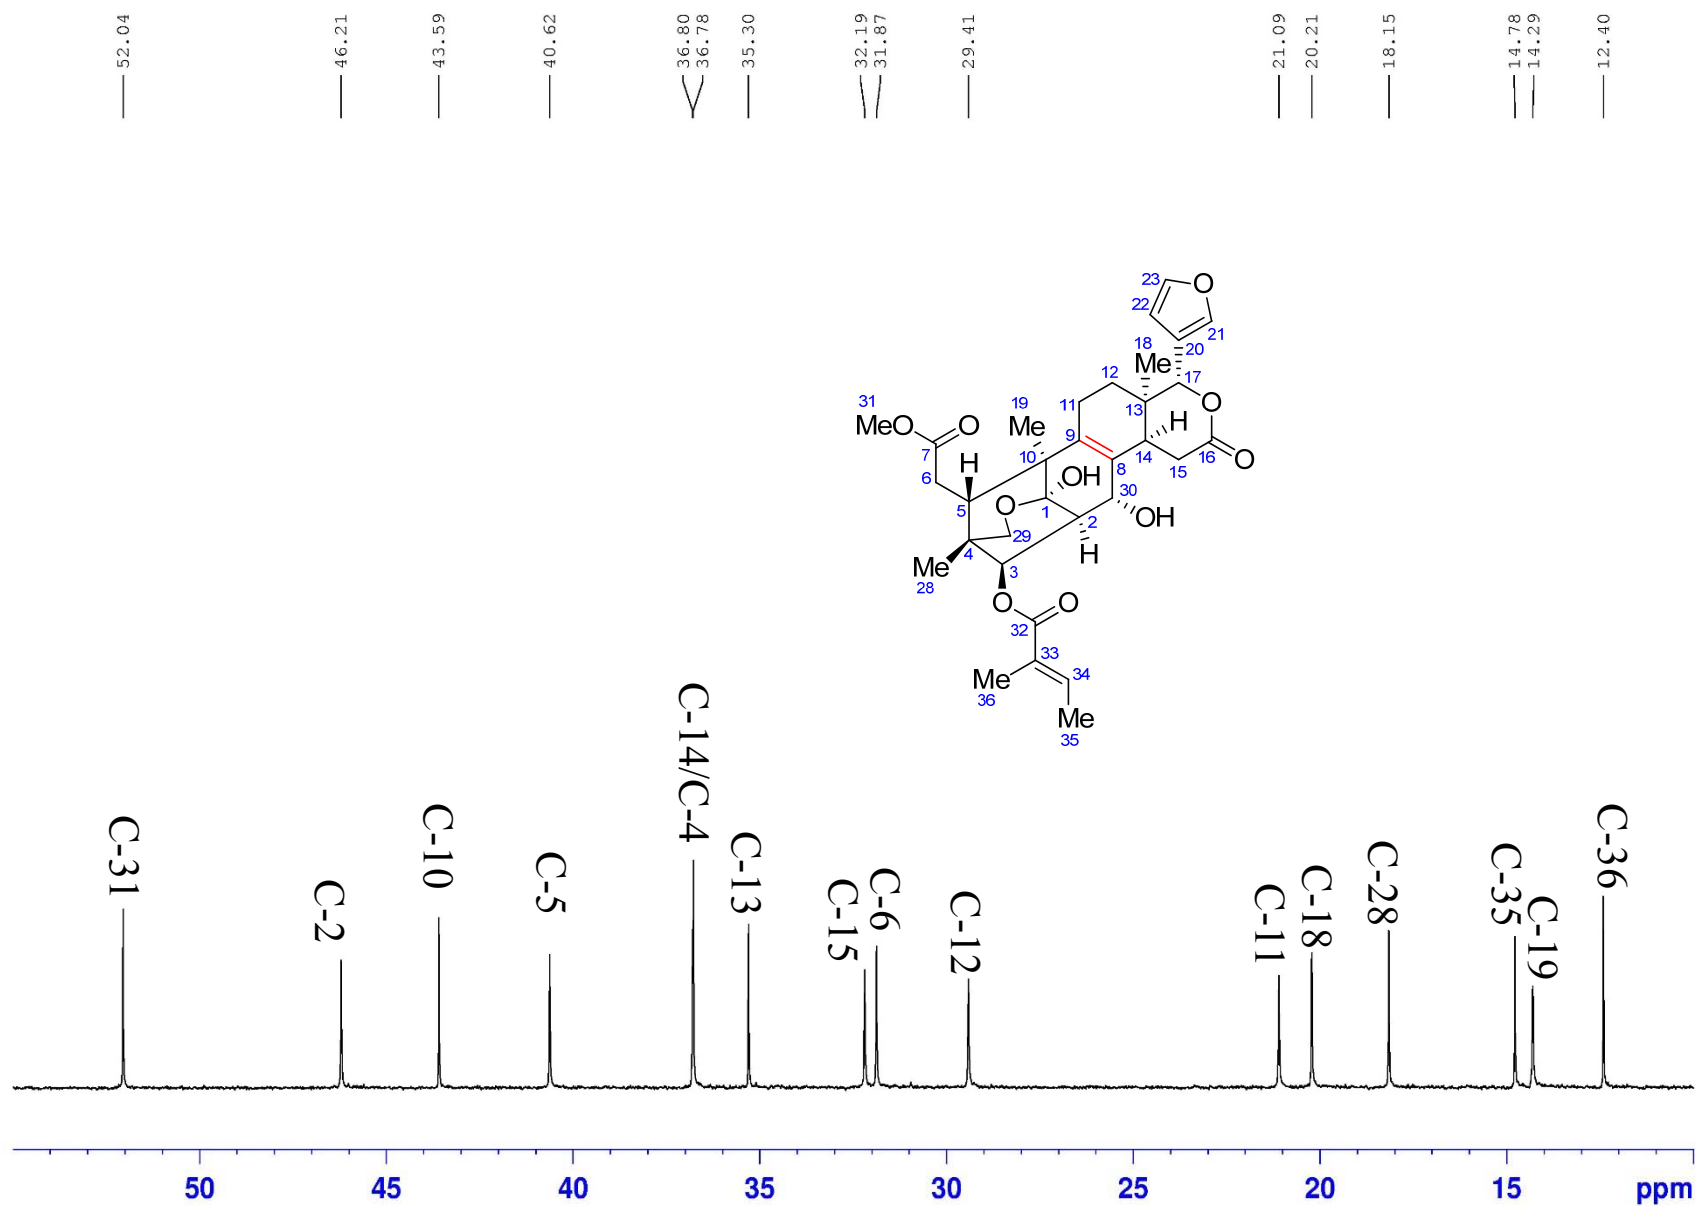

# DEPT135 (100 MHz) spectrum of compound **5** in CDCl<sub>3</sub>

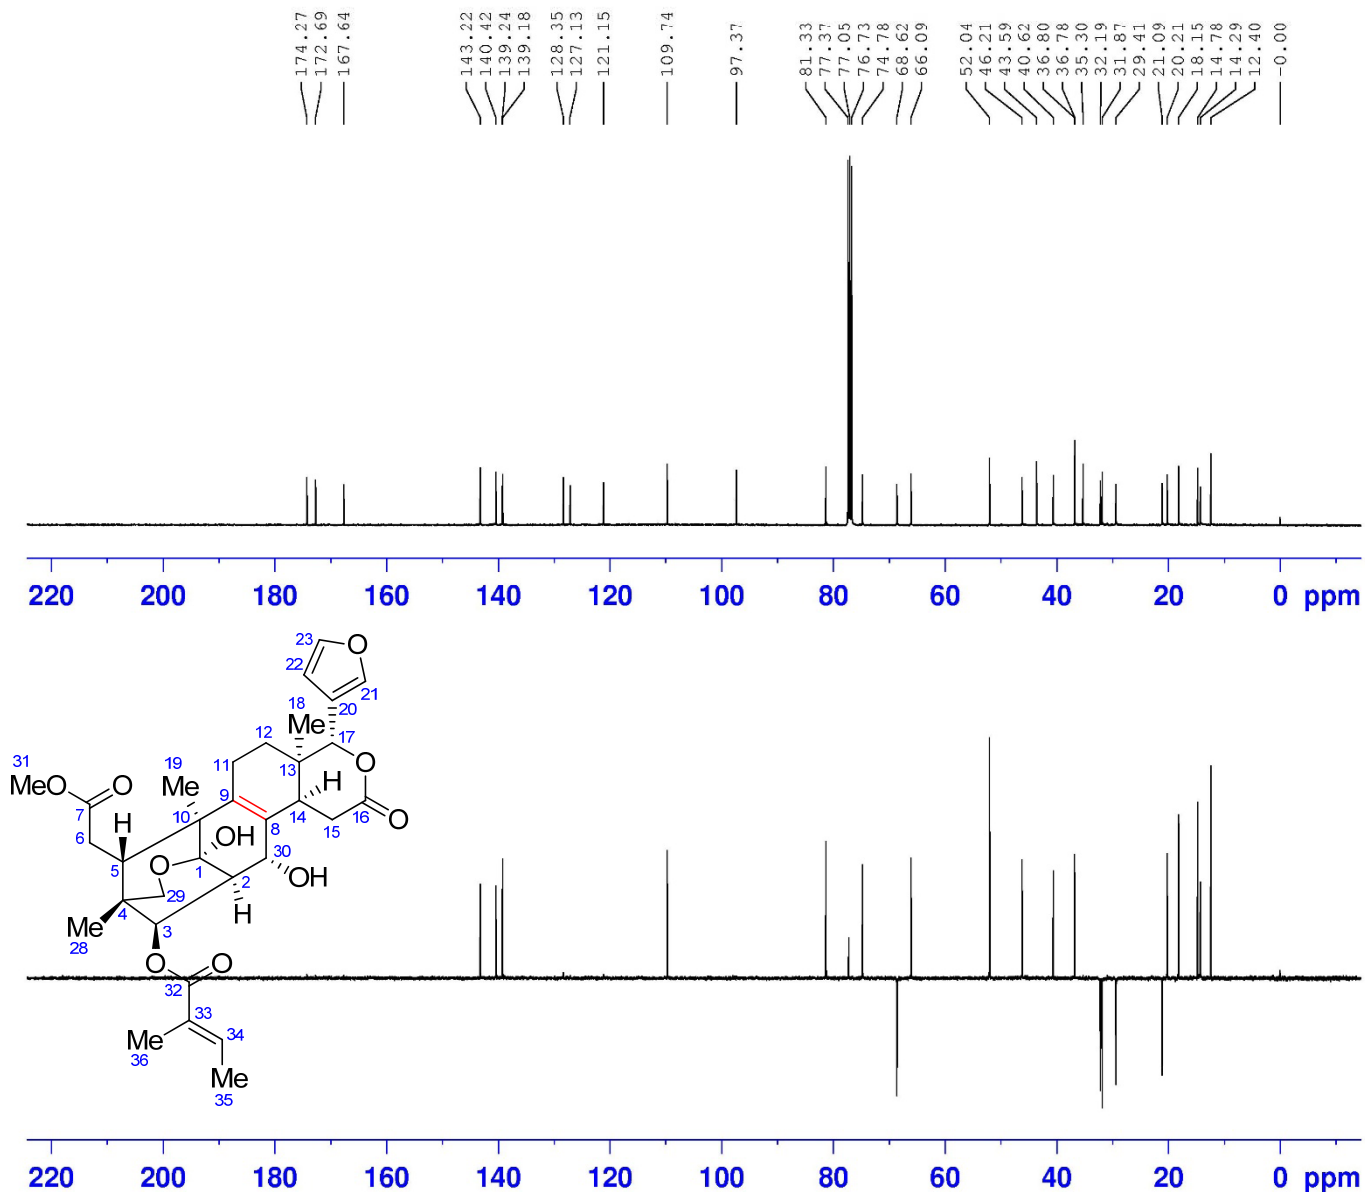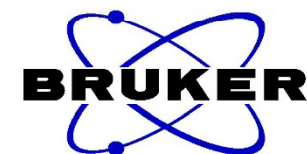

NAME ZXP-R-18-2-2-2 new  
 EXPNO 2  
 PROCNO 1  
 Date\_ 20171206  
 Time 23.34  
 INSTRUM spect  
 PROBHD 5 mm CPPBBO BB  
 PULPROG zgpg30  
 TD 65536  
 SOLVENT CDCl3  
 NS 1024  
 DS 4  
 SWH 24038.461 Hz  
 FIDRES 0.366798 Hz  
 AQ 1.3631988 sec  
 RG 117.37  
 DW 20.800 usec  
 DE 18.00 usec  
 TE 297.0 K  
 D1 2.00000000 sec  
 D11 0.03000000 sec  
 TD0 1

===== CHANNEL f1 =====  
 SFO1 100.6233324 MHz  
 NUC1 13C  
 P1 10.00 usec  
 SI 32768  
 SF 100.6127689 MHz  
 WDW EM  
 SSB 0  
 LB 1.00 Hz  
 GB 0  
 PC 1.40



DEPT135 (100 MHz) spectrum of compound **5** in CDCl<sub>3</sub>

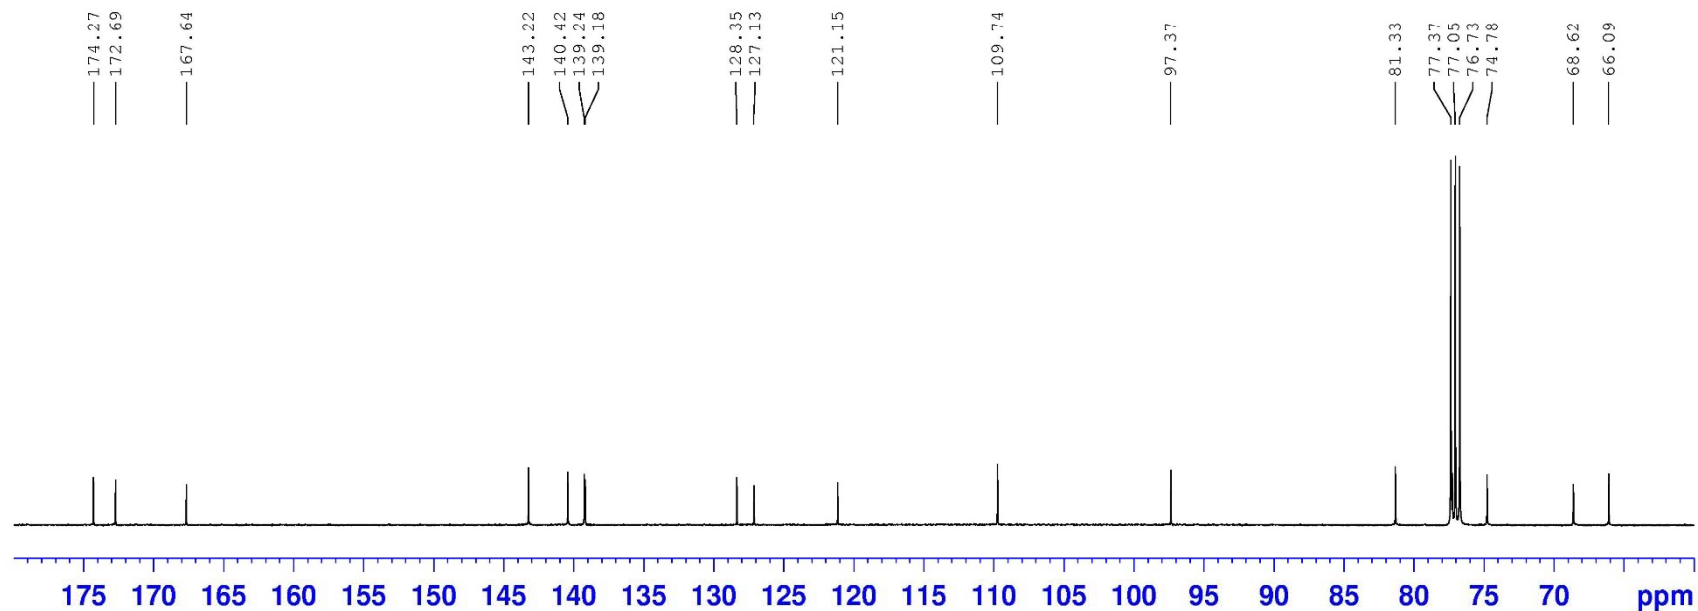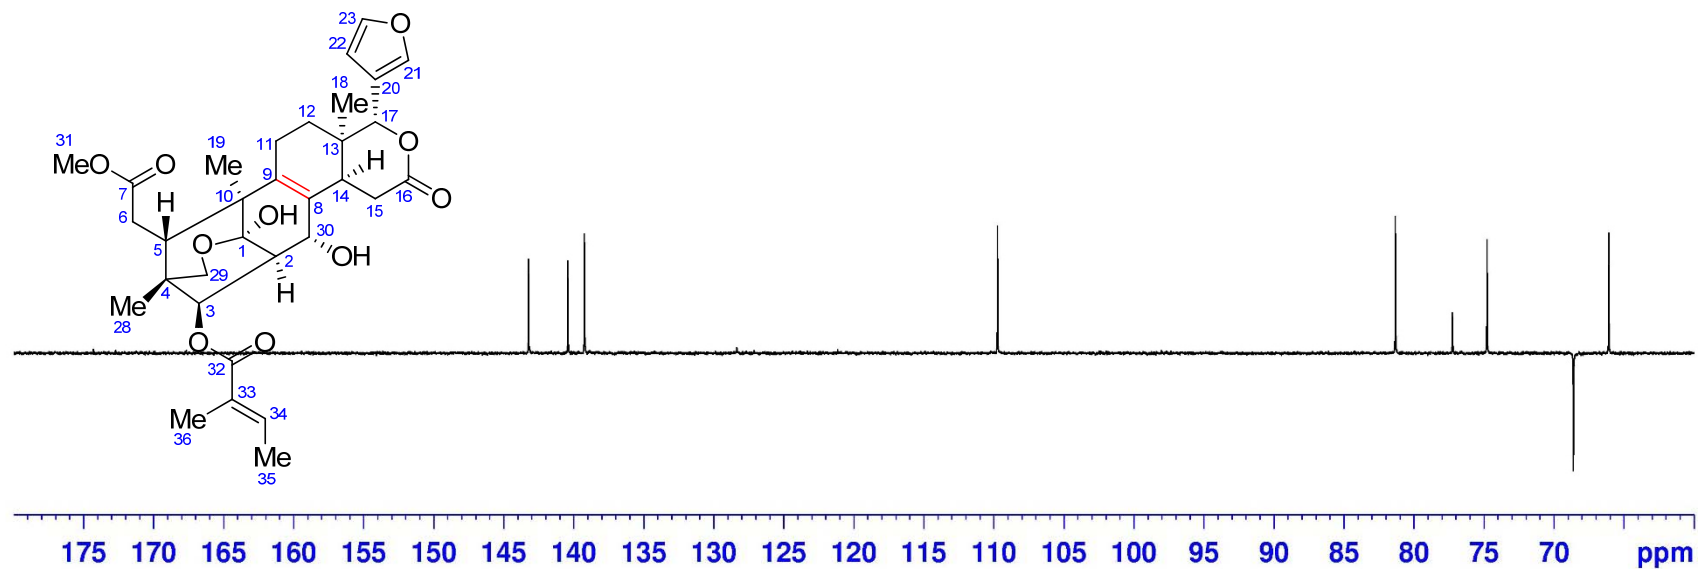

S123

S123

DEPT135 (100 MHz) spectrum of compound **5** in CDCl<sub>3</sub>

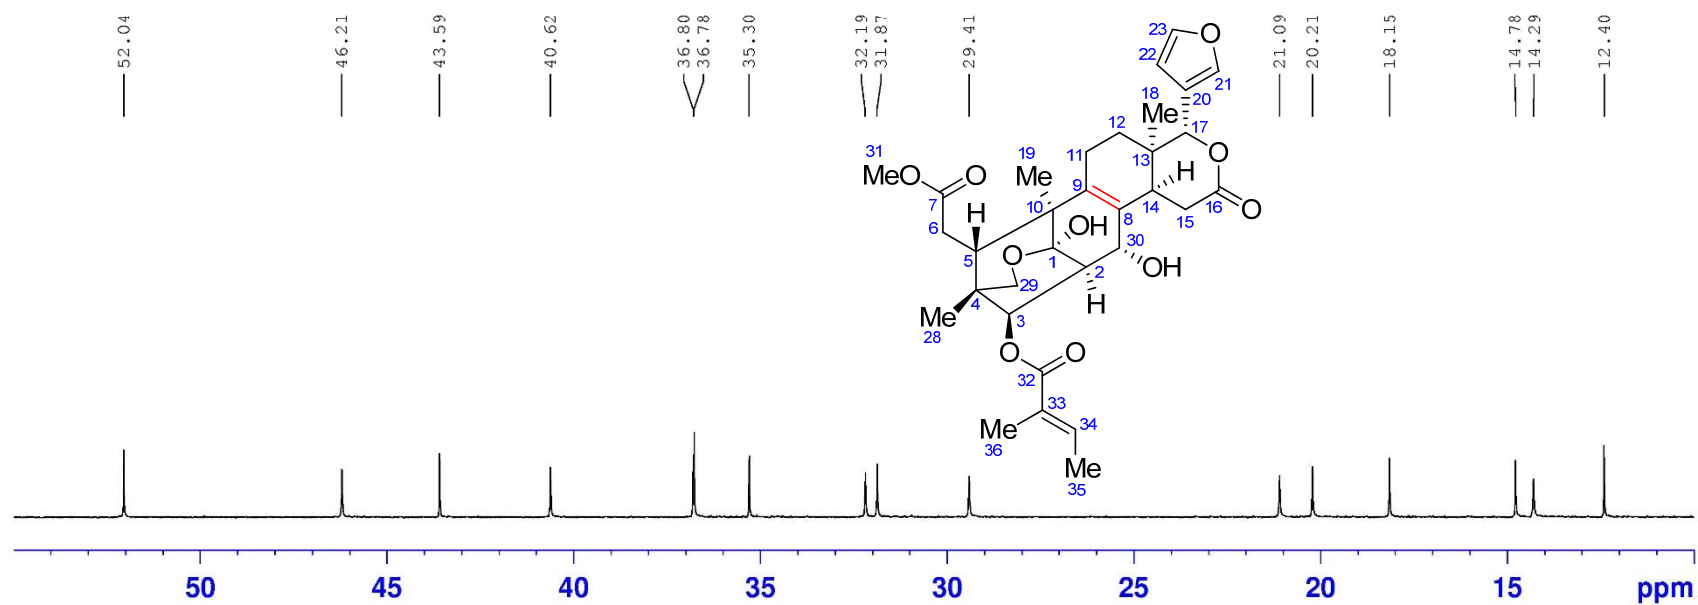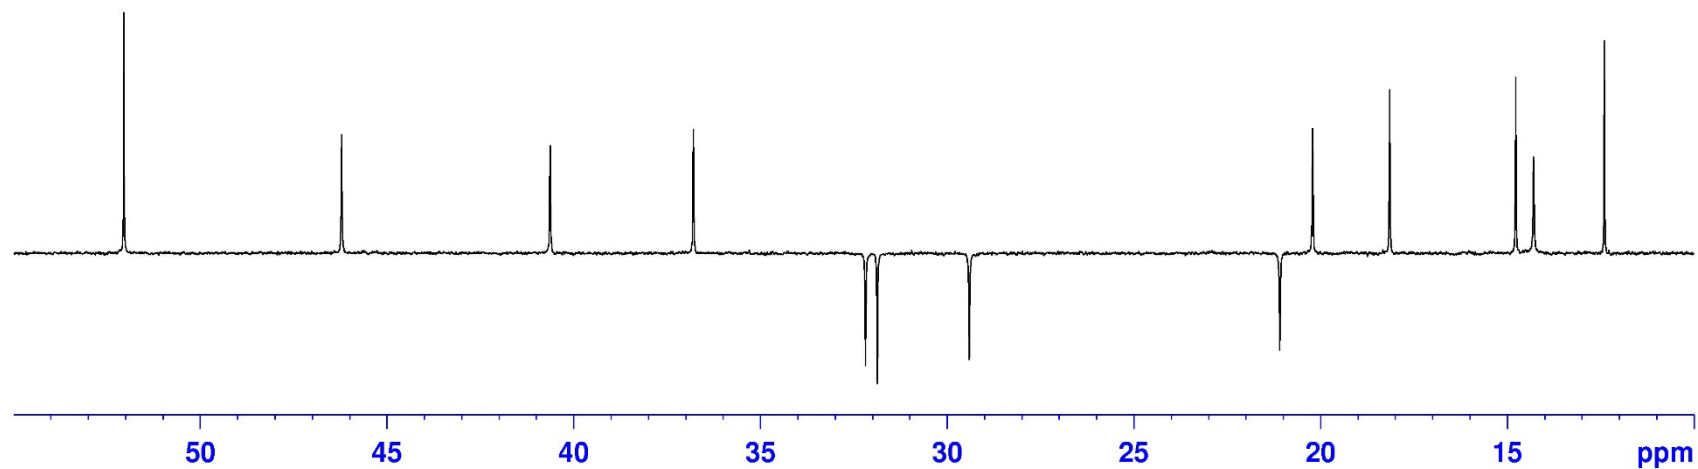

# $^1\text{H}$ - $^1\text{H}$ COSY (400 MHz) spectrum of compound **5** in $\text{CDCl}_3$

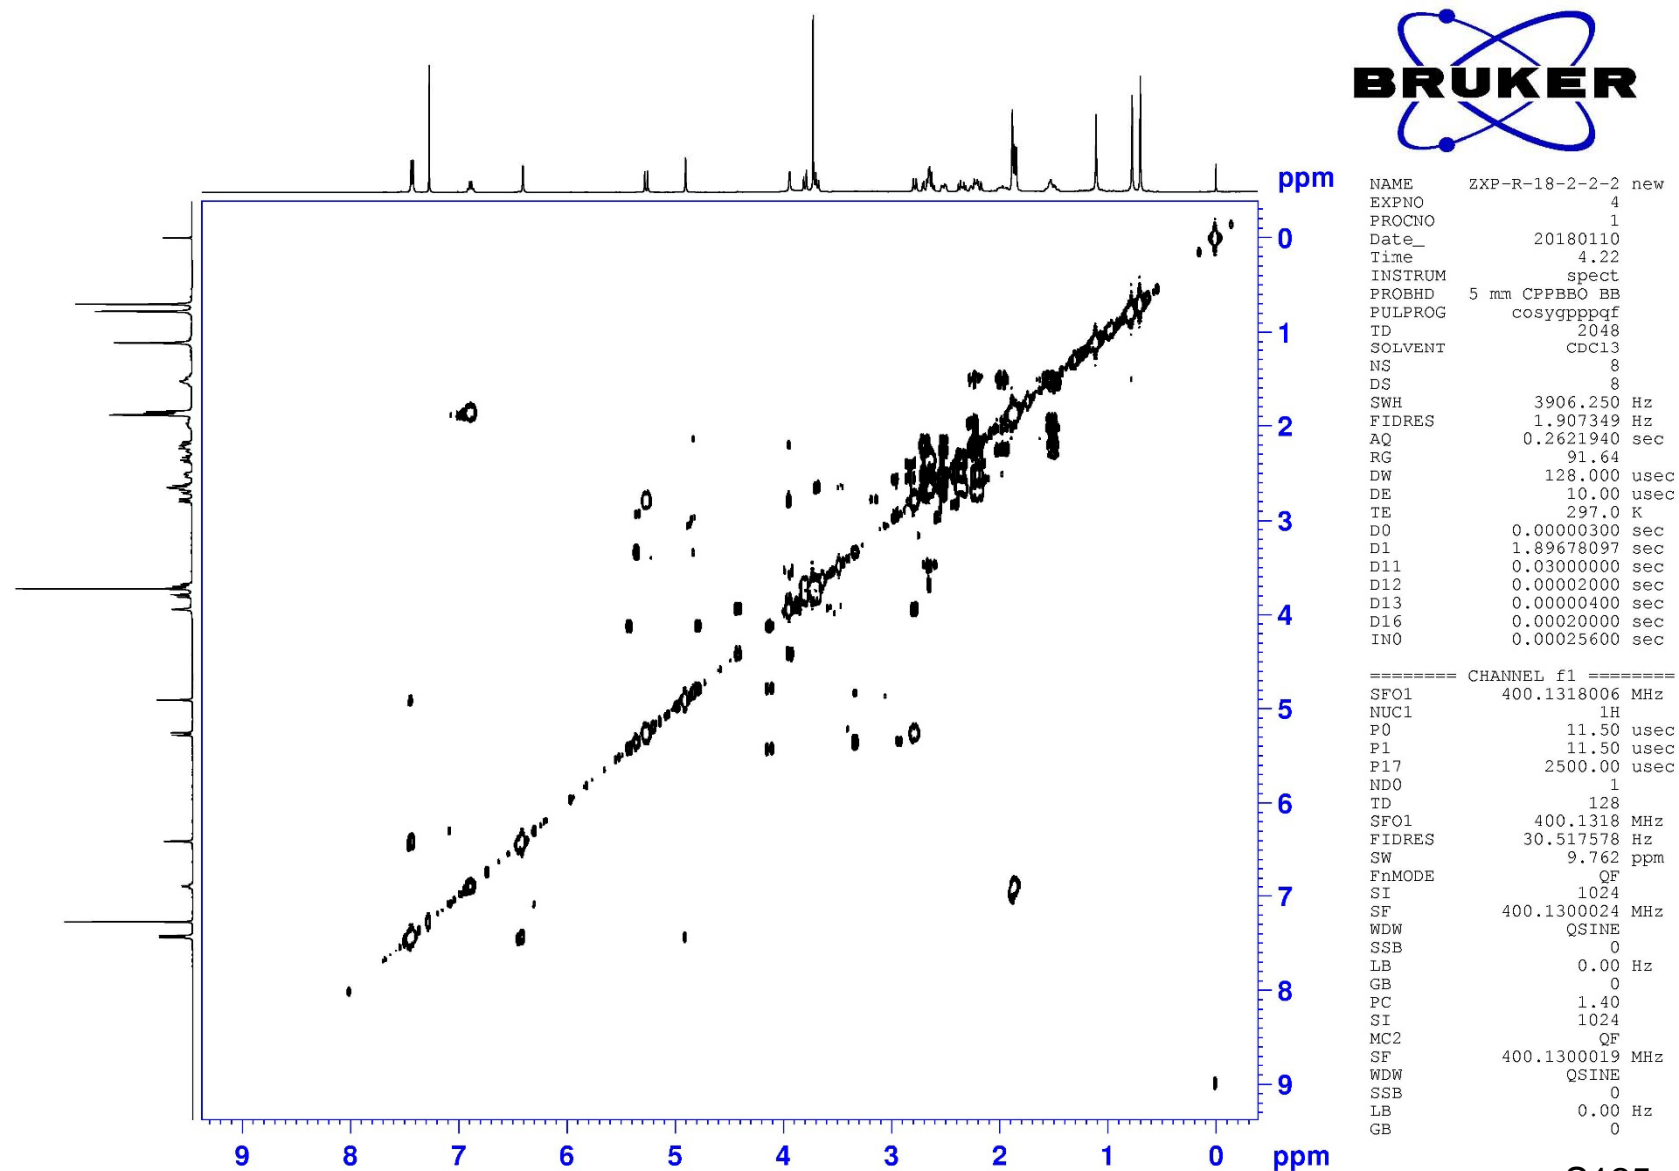

S125

$^1\text{H}$ - $^1\text{H}$  COSY (400 MHz) spectrum of compound **5** in  $\text{CDCl}_3$

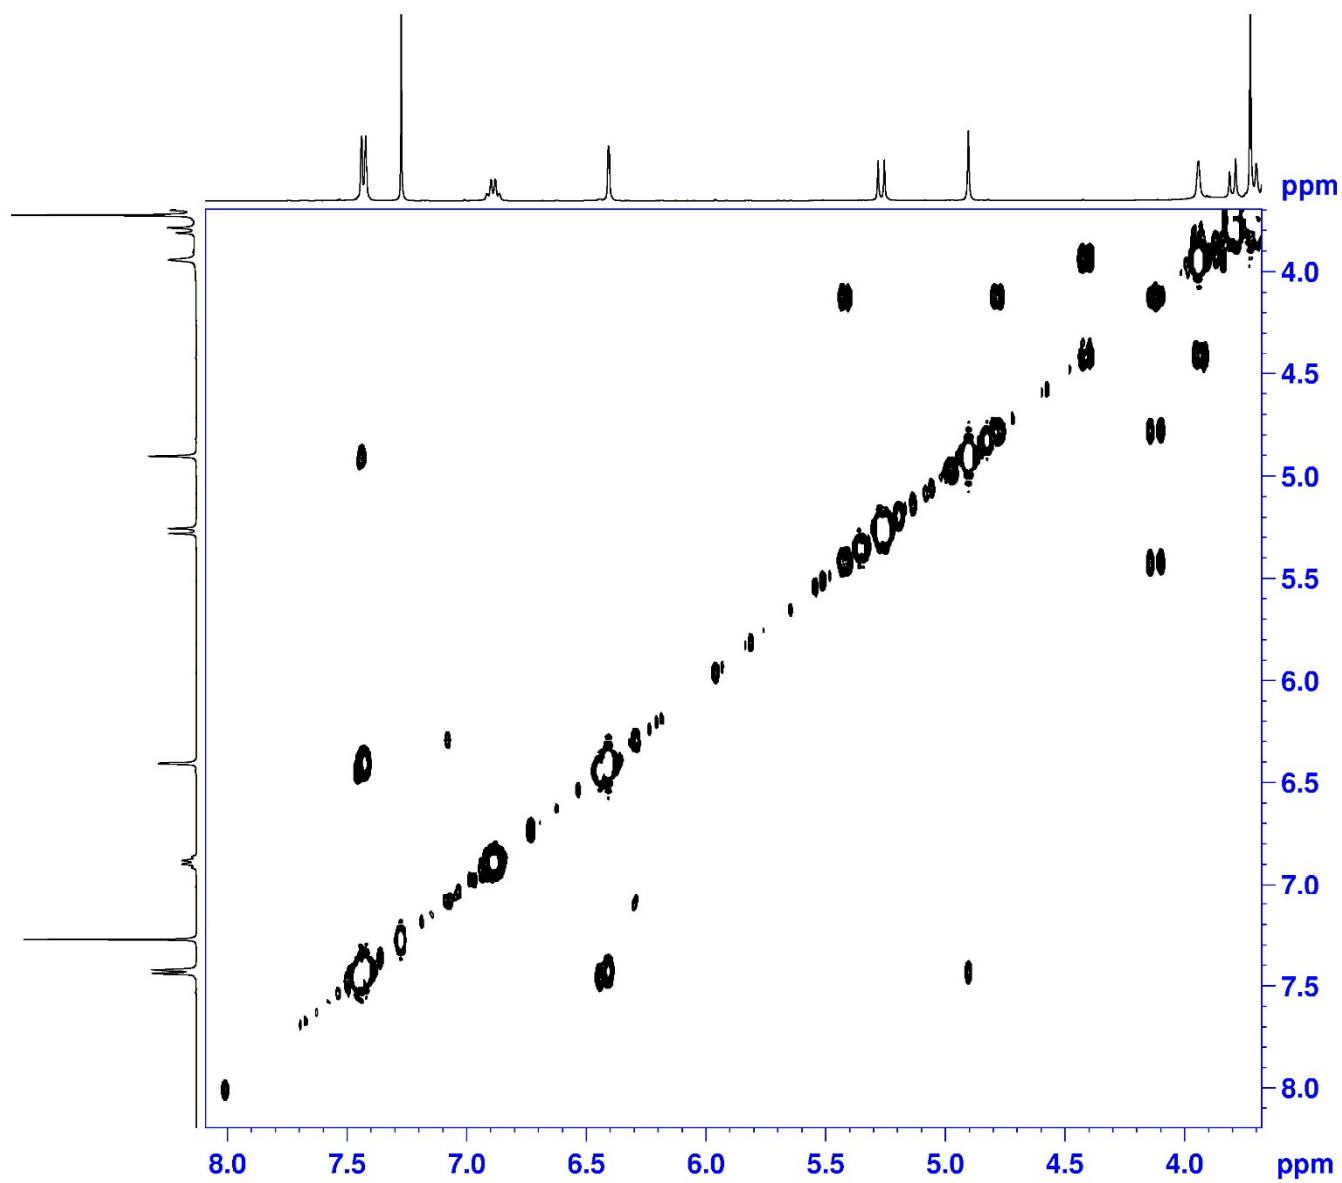

$^1\text{H}$ - $^1\text{H}$  COSY (400 MHz) spectrum of compound **5** in  $\text{CDCl}_3$

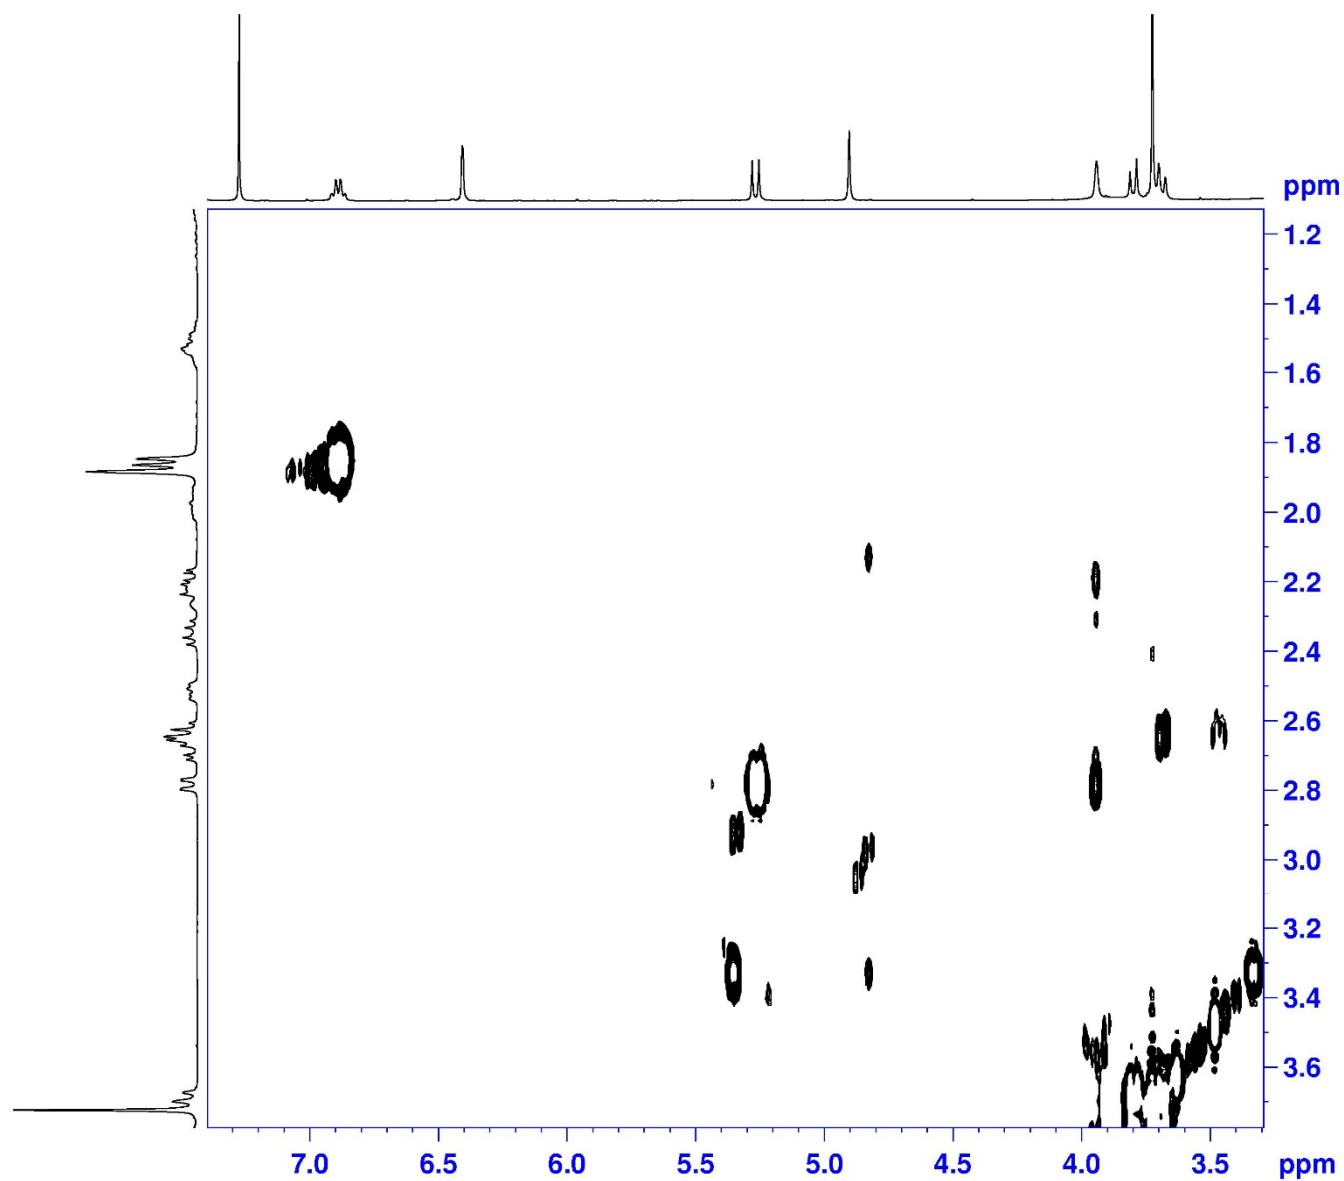

$^1\text{H}$ - $^1\text{H}$  COSY (400 MHz) spectrum of compound **5** in  $\text{CDCl}_3$

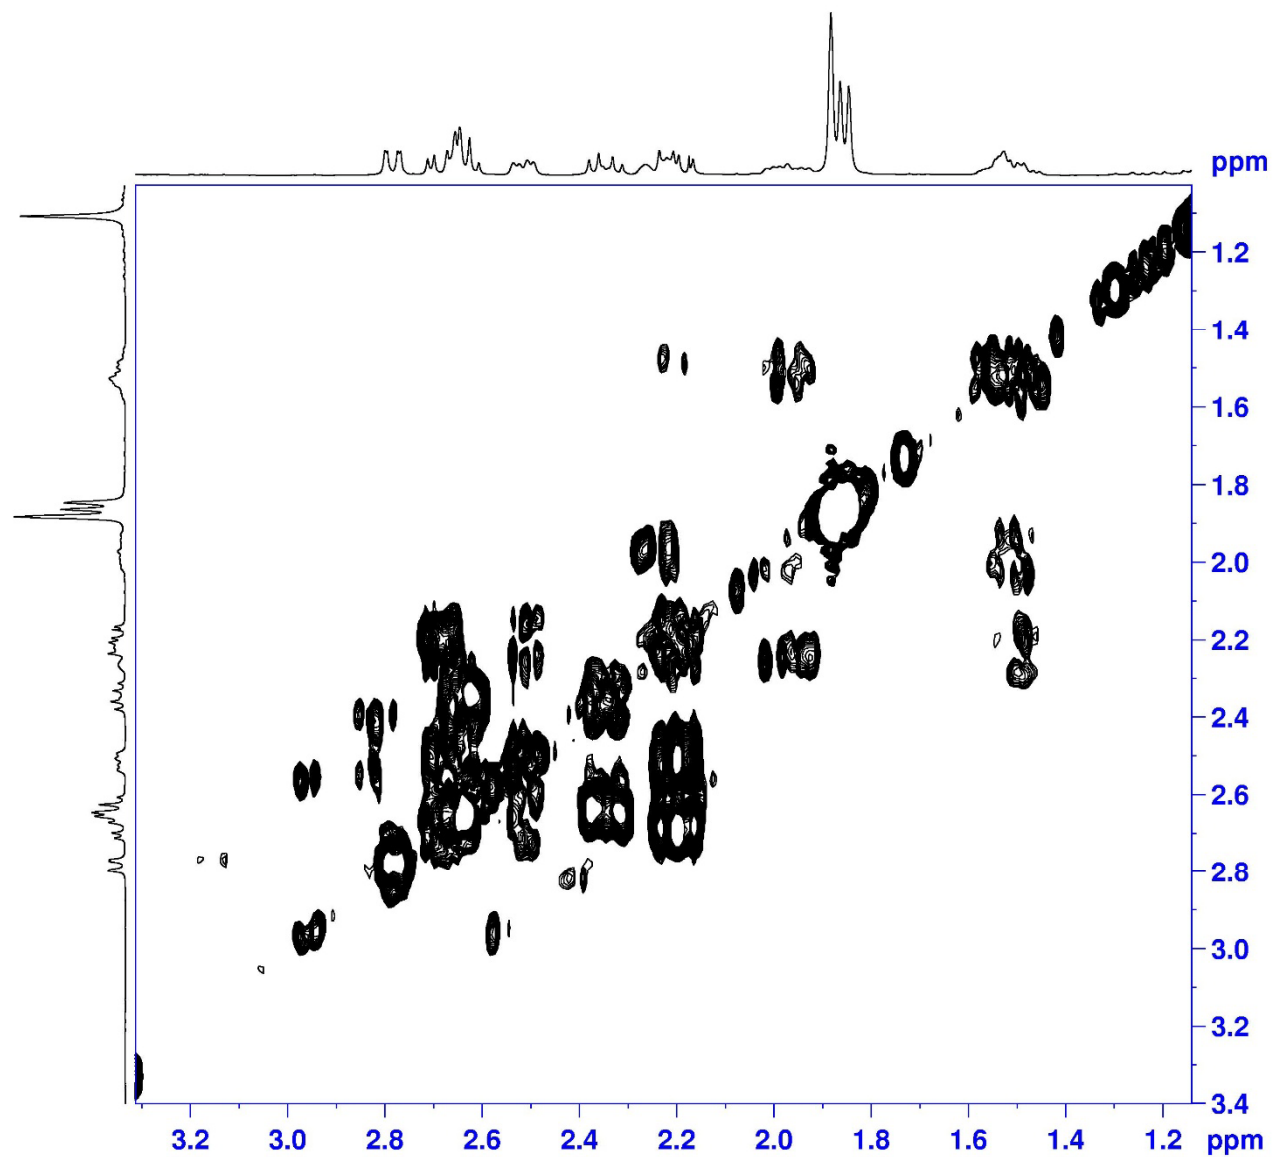

# HSQC (400 MHz) spectrum of compound **5** in CDCl<sub>3</sub>

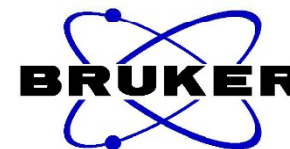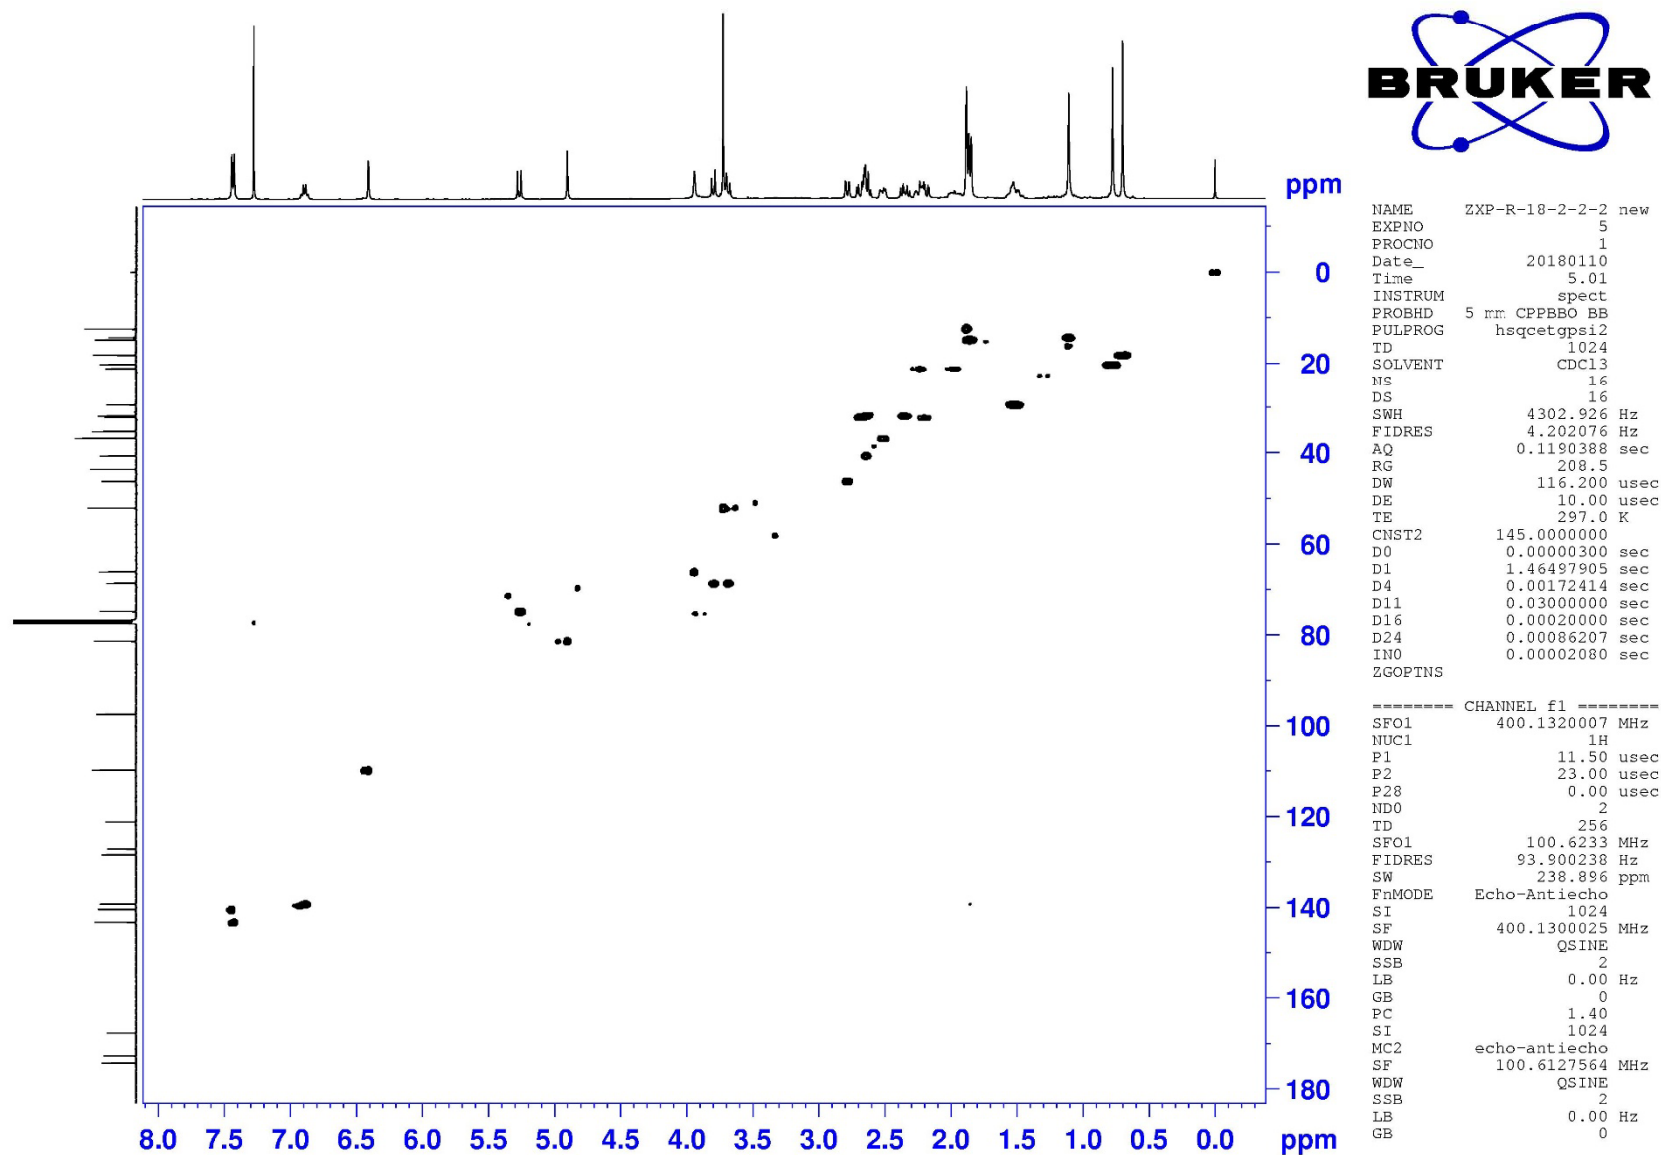

HSQC (400 MHz) spectrum of compound **5** in CDCl<sub>3</sub>

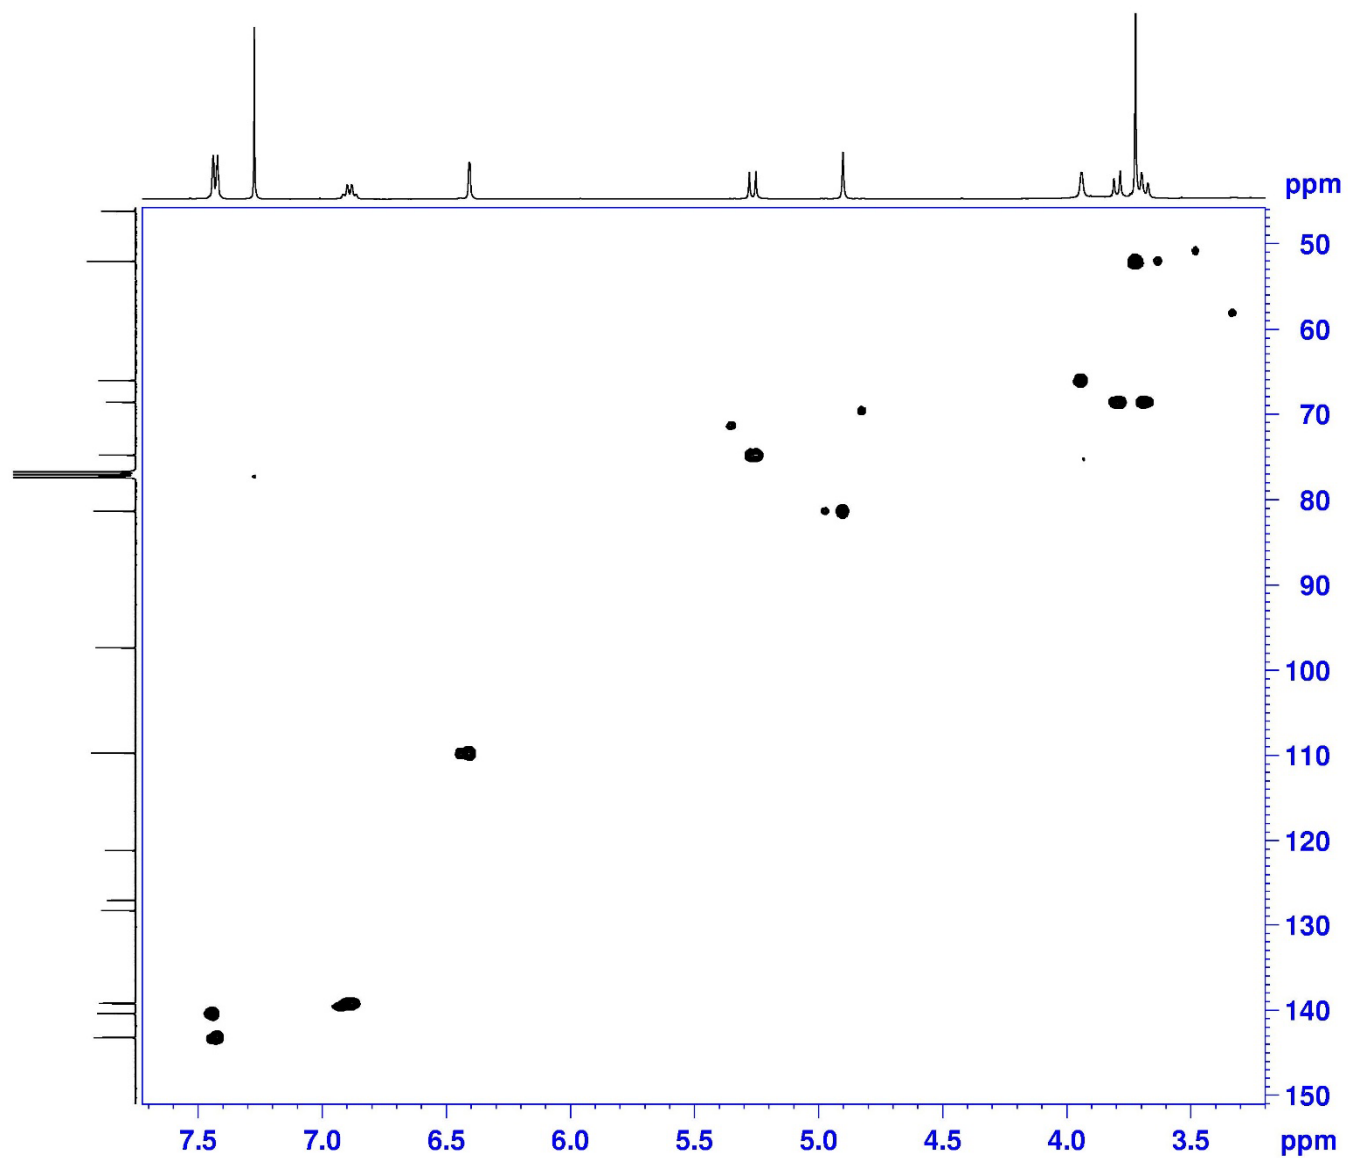



HSQC (400 MHz) spectrum of compound **5** in  $\text{CDCl}_3$

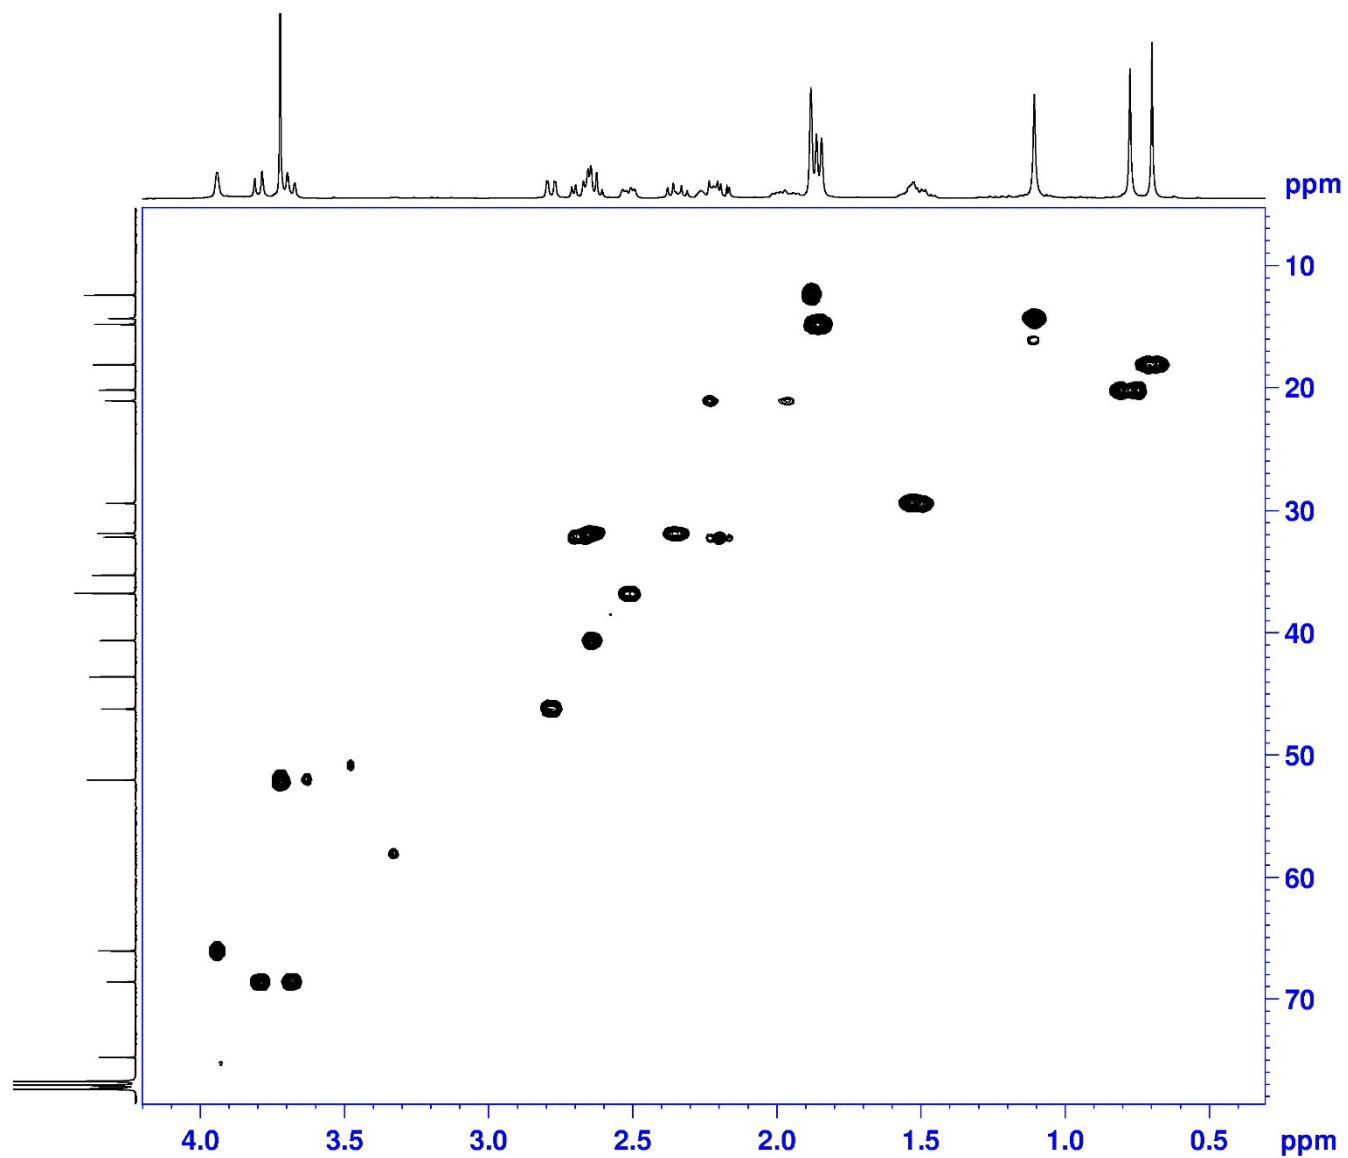

# HMBC (400 MHz) spectrum of compound **5** in CDCl<sub>3</sub>

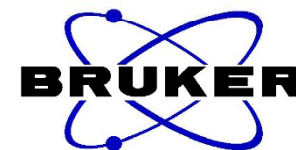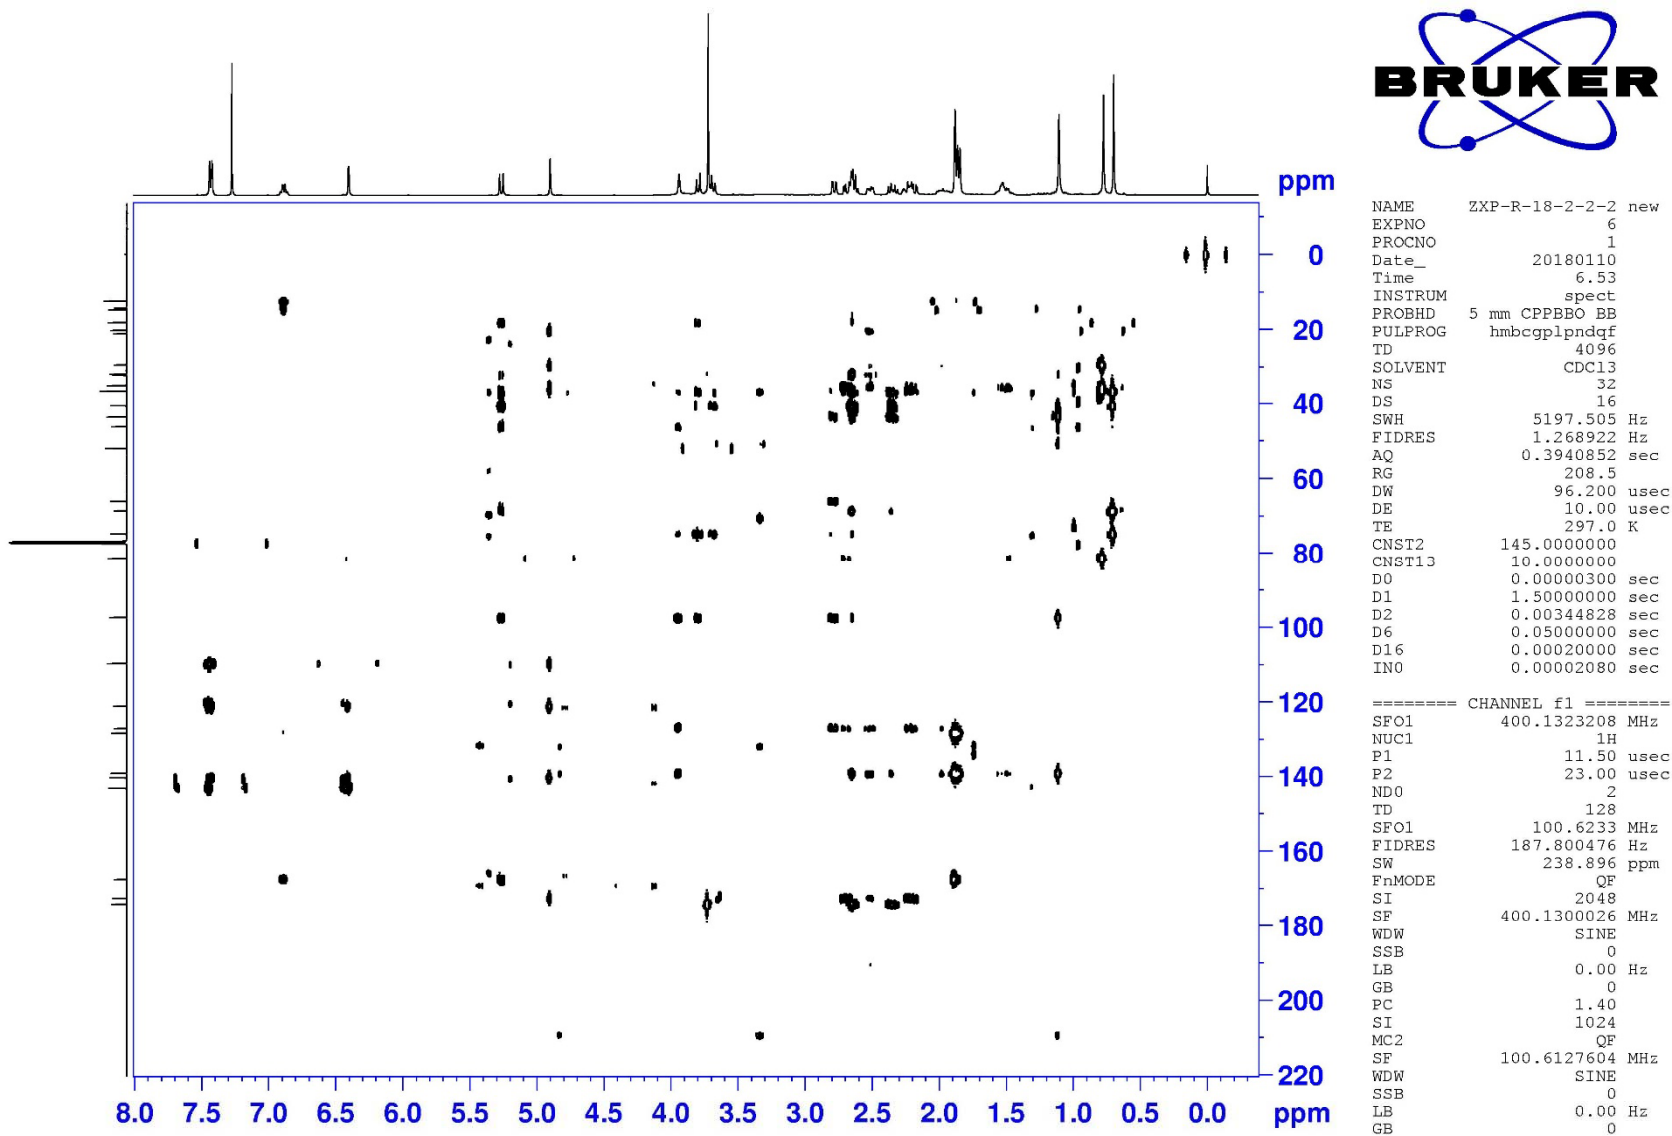

HMBC (400 MHz) spectrum of compound **5** in  $\text{CDCl}_3$

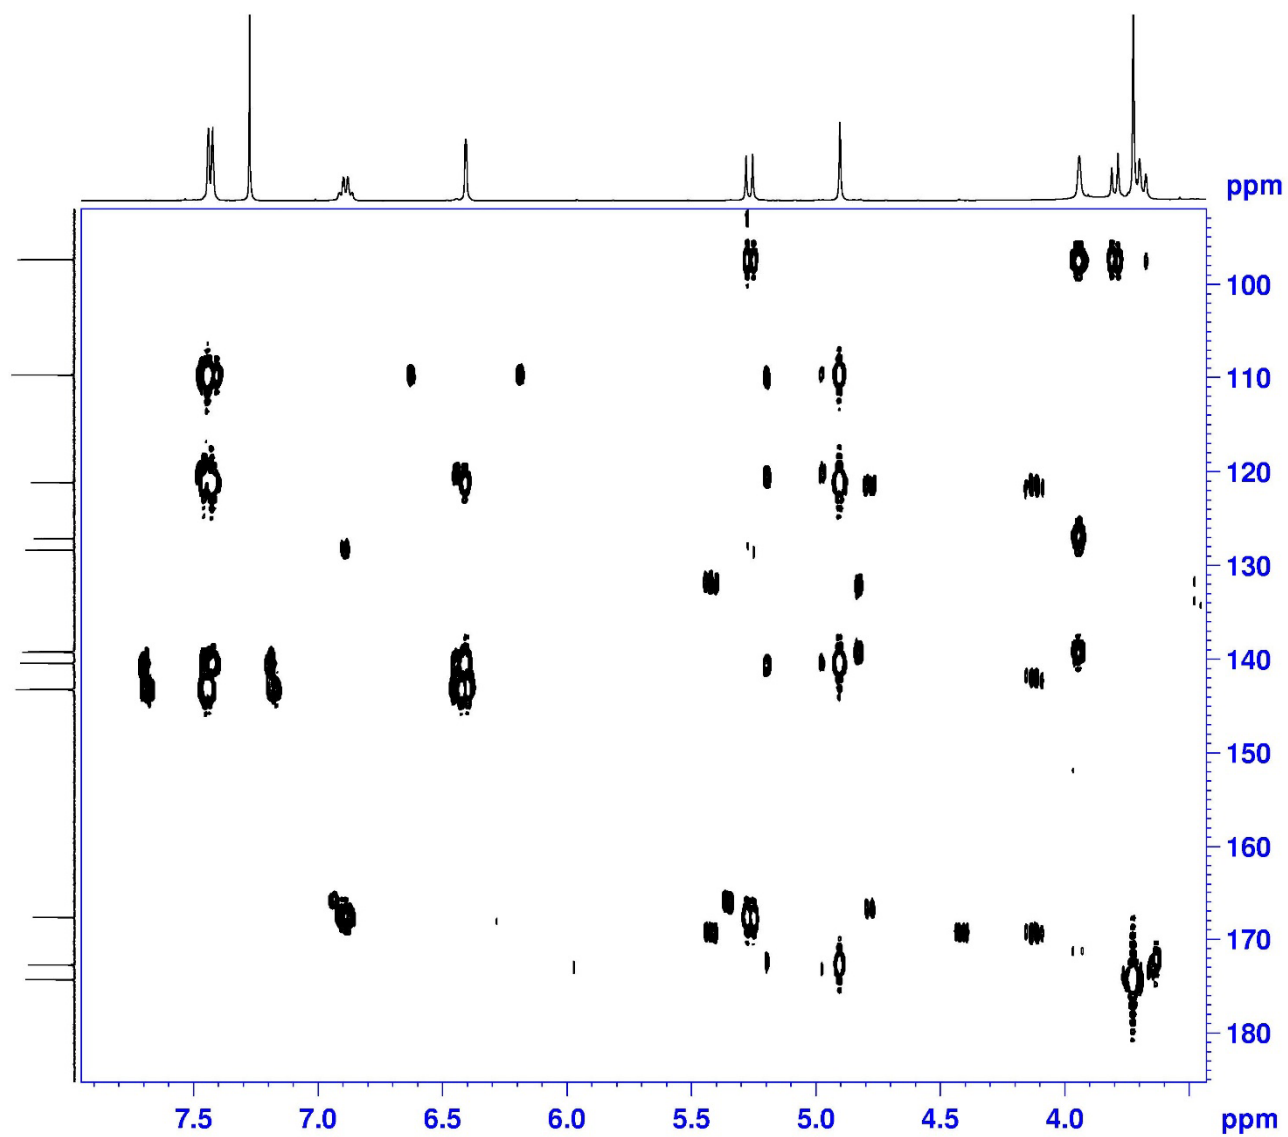

HMBC (400 MHz) spectrum of compound **5** in  $\text{CDCl}_3$

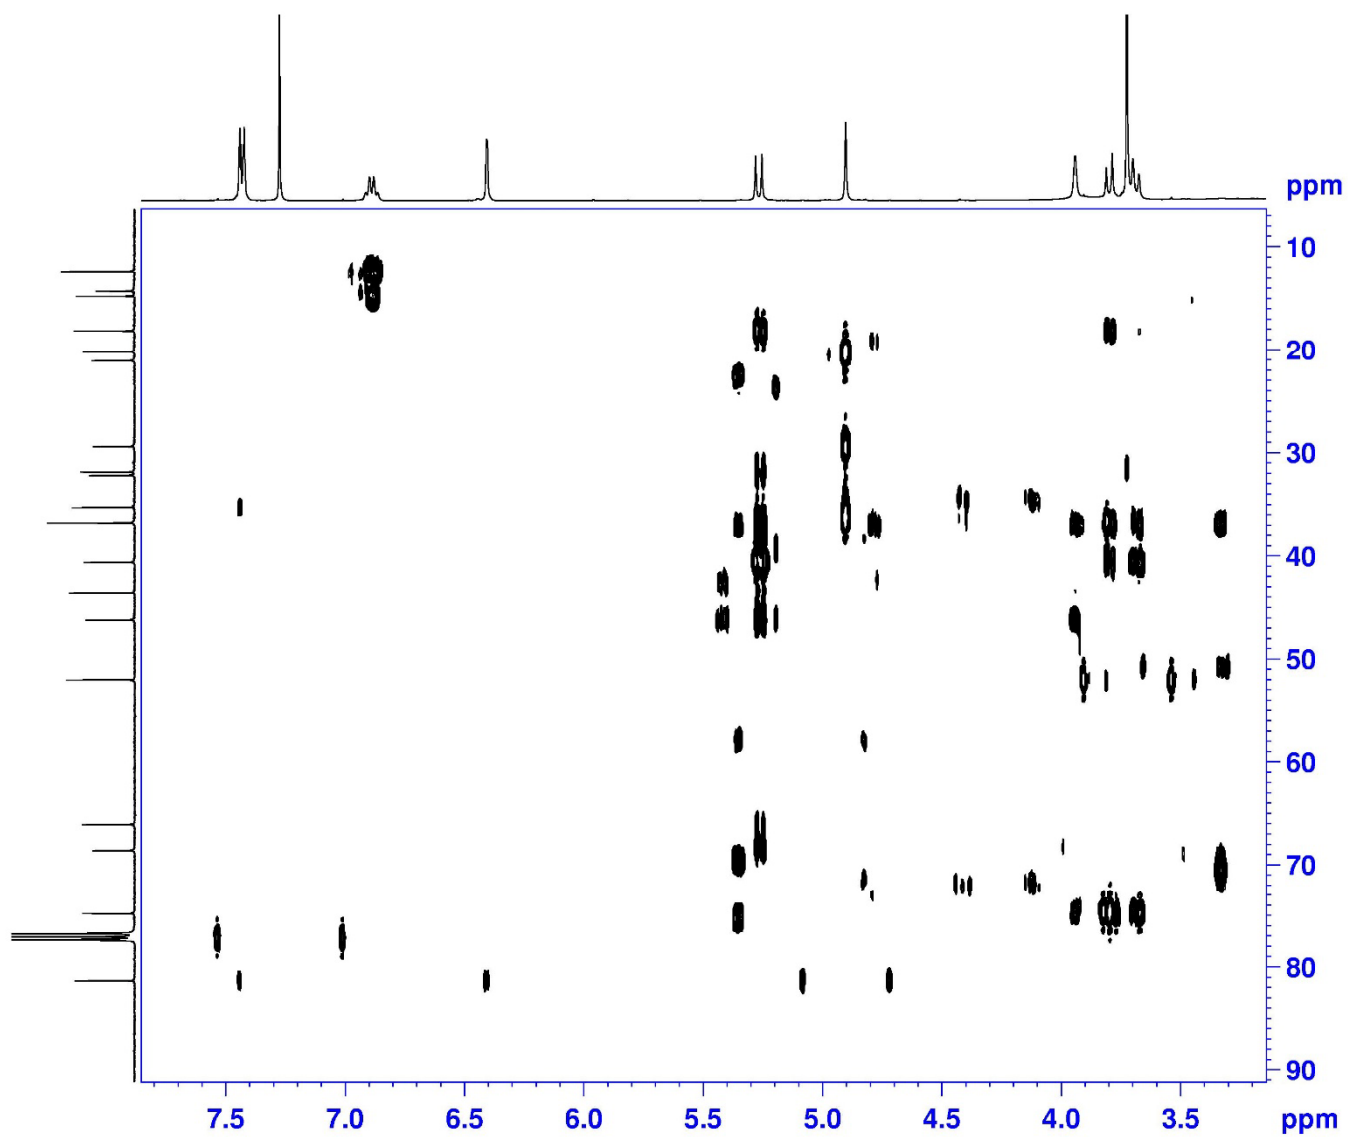

HMBC (400 MHz) spectrum of compound **5** in CDCl<sub>3</sub>

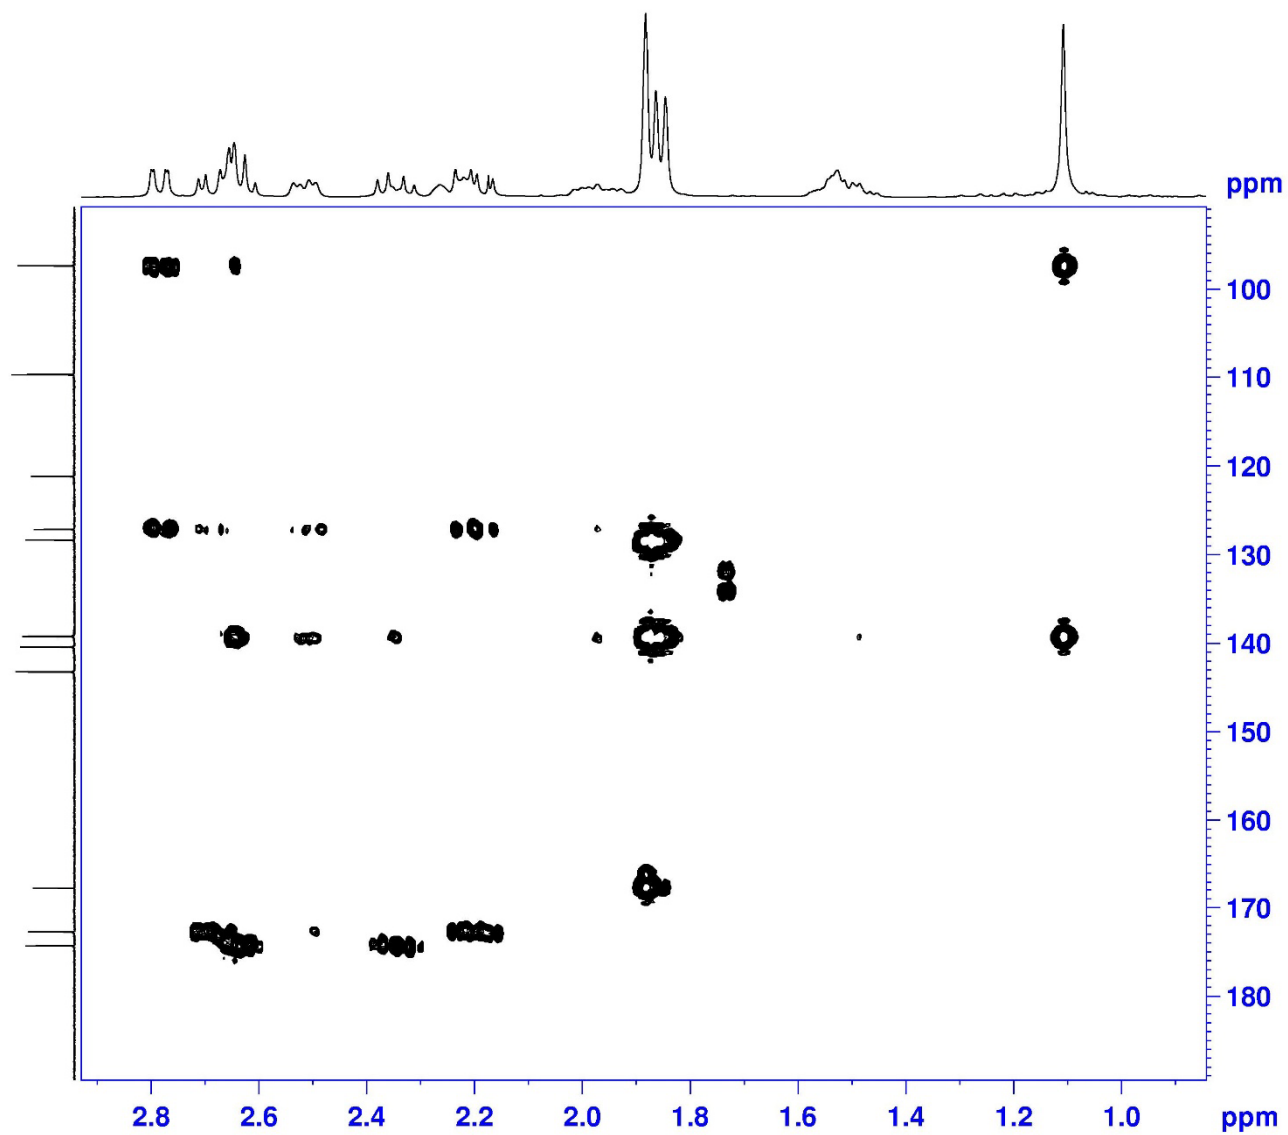

HMBC (400 MHz) spectrum of compound **5** in  $\text{CDCl}_3$

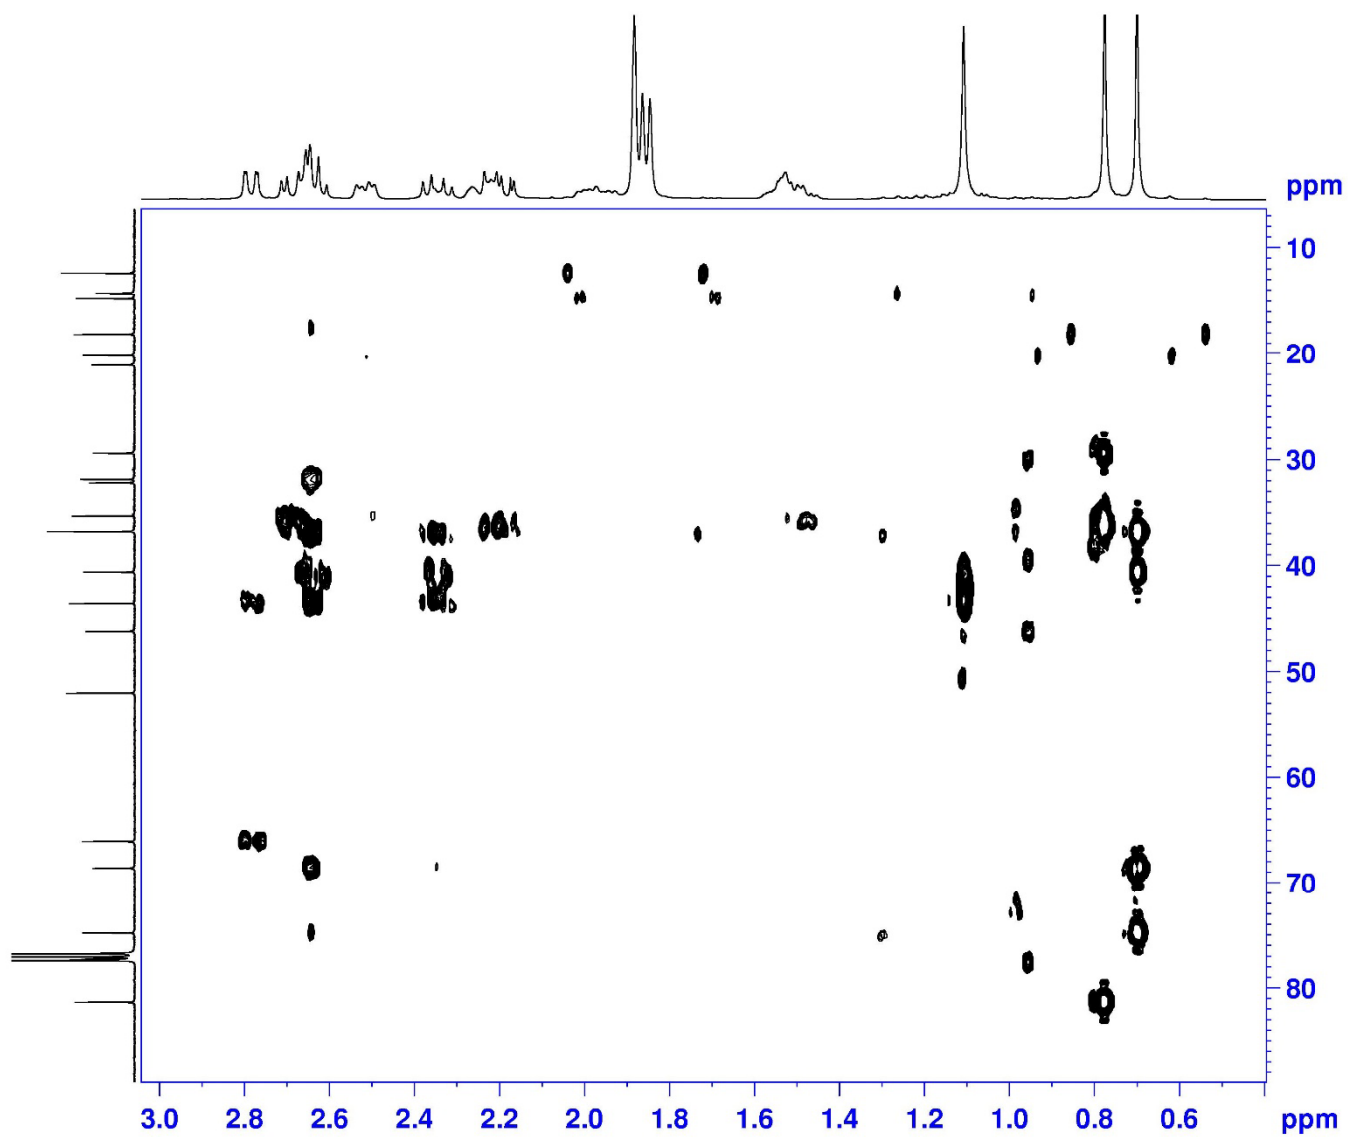

# NOESY (400 MHz) spectrum of compound **5** in CDCl<sub>3</sub>

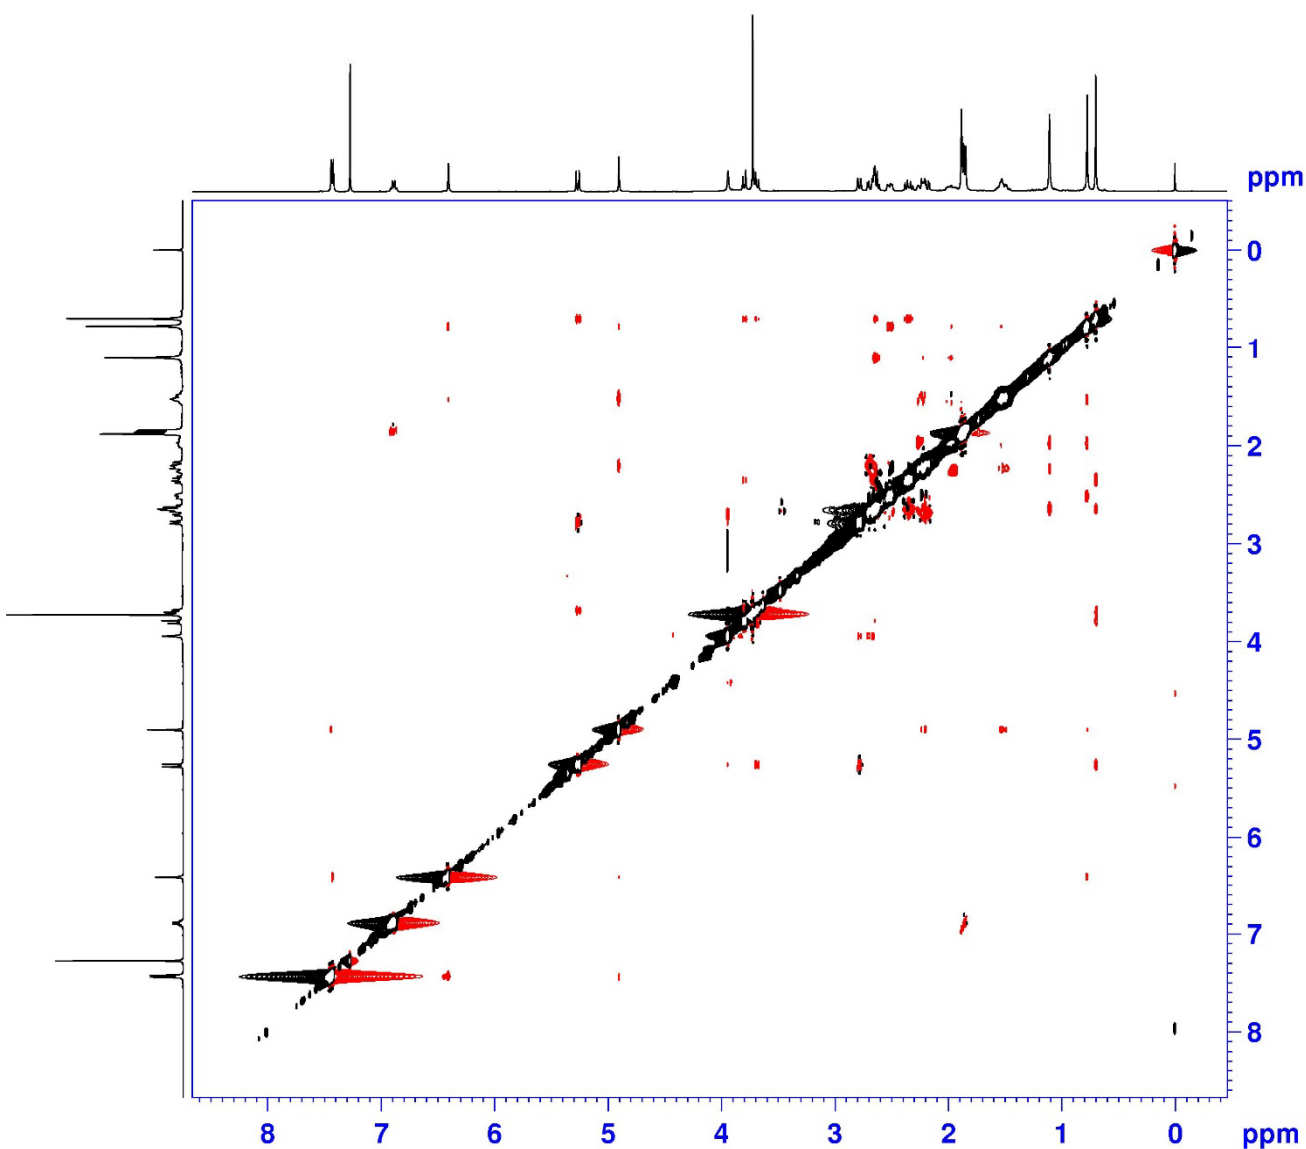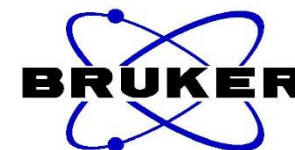

```
NAME      ZXP-R-18-2-2 new
EXPNO      7
PROCNO     1
Date_      20180110
Time       9.08
INSTRUM    spect
PROBHD     5 mm CPPBBO BB
PULPROG    noesygpphph
TD         2048
SOLVENT    CDCl3
NS         16
DS         32
SWH        4000.000 Hz
FIDRES     1.953125 Hz
AQ         0.2560500 sec
RG         85.34
DW         125.000 usec
DE         10.00 usec
TE         297.0 K
D0         0.00011036 sec
D1         1.99385595 sec
D8         0.30000001 sec
D11        0.03000000 sec
D12        0.00002000 sec
D16        0.00020000 sec
IN0        0.00025000 sec
```

```
===== CHANNEL f1 =====
SFO1      400.1318006 MHz
NUC1       1H
P1         11.50 usec
P2         23.00 usec
P17        2500.00 usec
ND0        1
TD         256
SFO1      400.1318 MHz
FIDRES     15.625000 Hz
SW         9.997 ppm
FnMODE     States-TPPI
SI         1024
SF         400.1300018 MHz
WDW        QSINE
SSB        2
LB         0.00 Hz
GB         0
PC         1.00
SI         1024
MC2        States-TPPI
SF         400.1300029 MHz
WDW        QSINE
SSB        2
LB         0.00 Hz
GB         0
```

S137

NOESY (400 MHz) spectrum of compound **5** in  $\text{CDCl}_3$

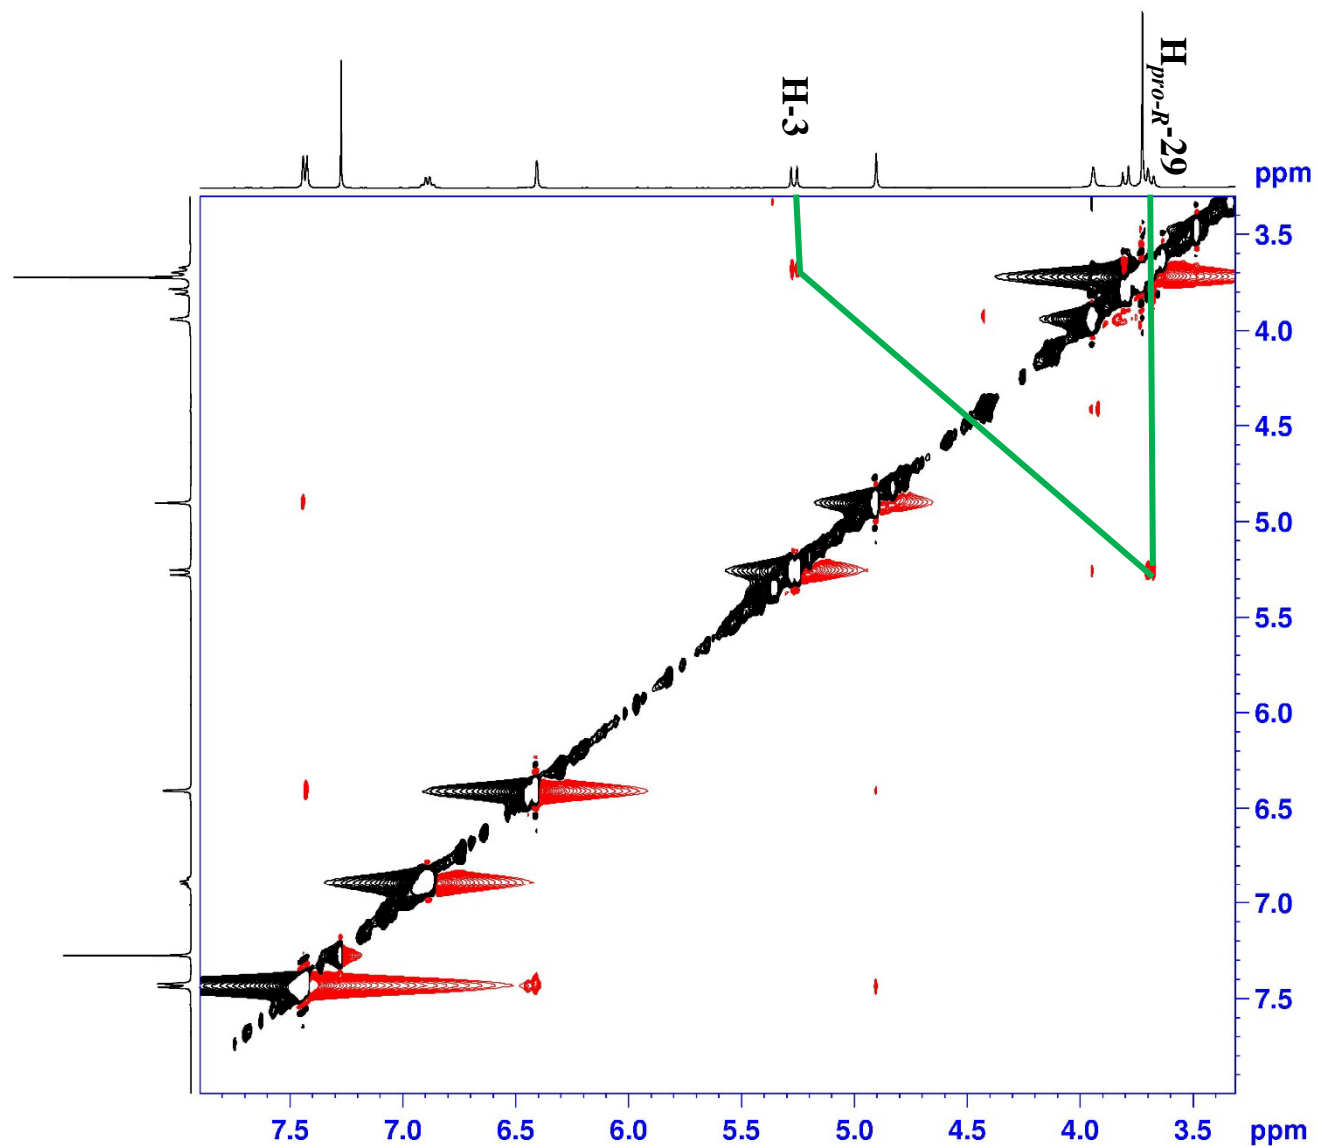



NOESY (400 MHz) spectrum of compound **5** in CDCl<sub>3</sub>

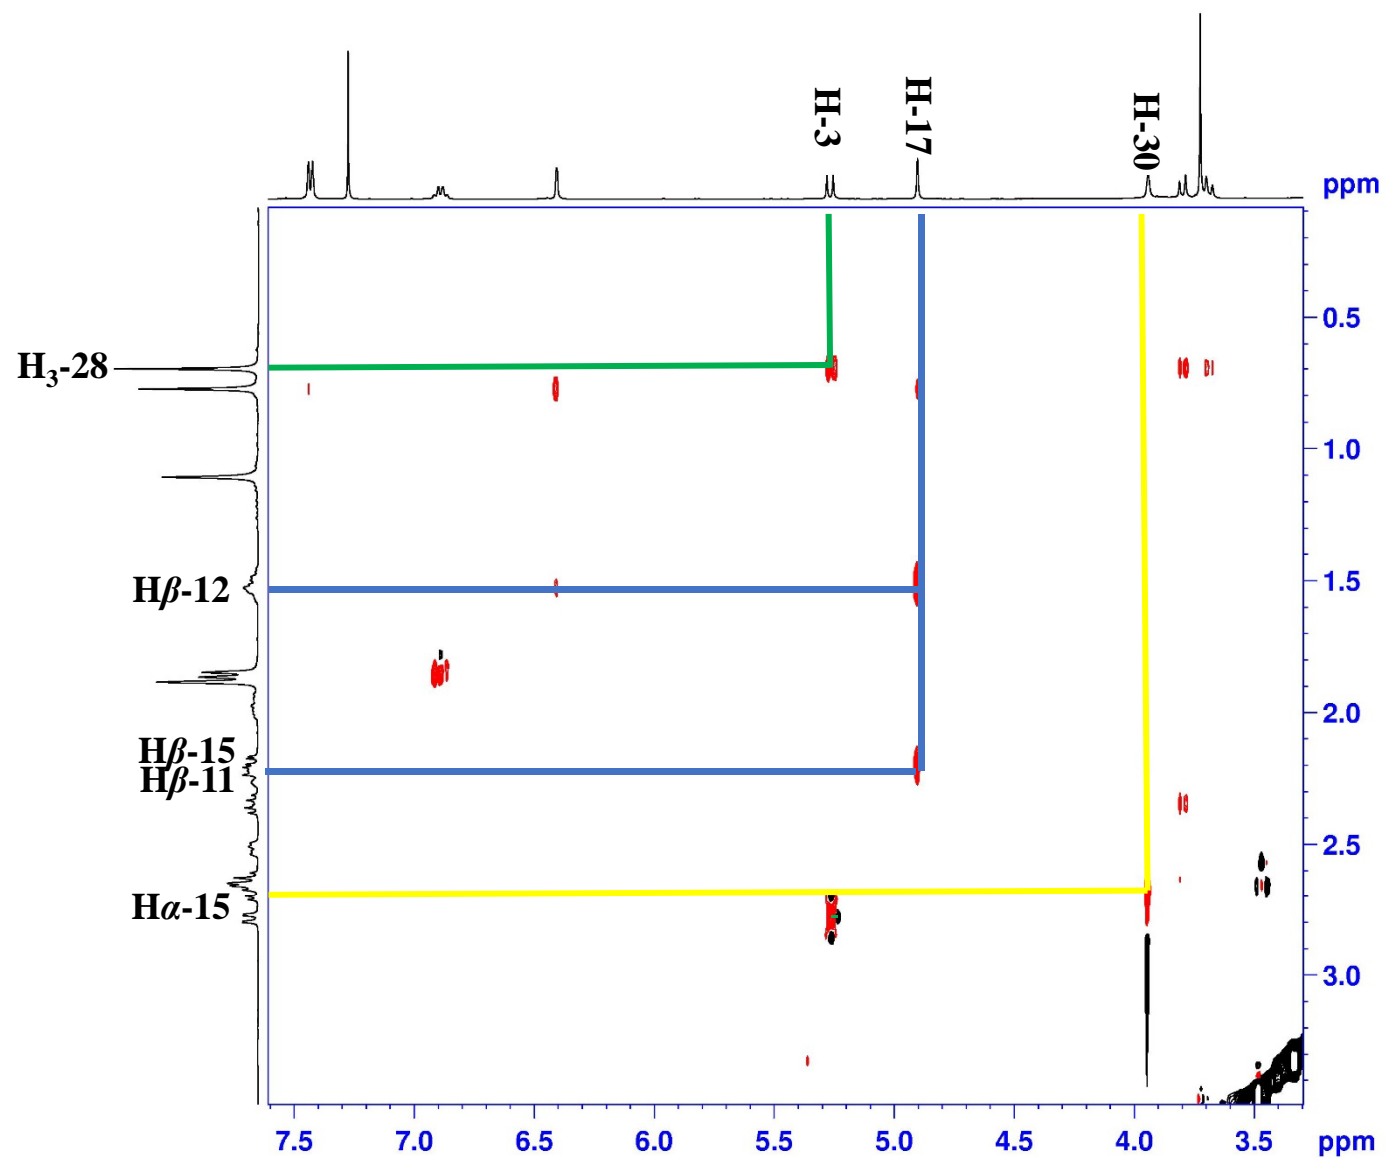

NOESY (400 MHz) spectrum of compound **5** in  $\text{CDCl}_3$

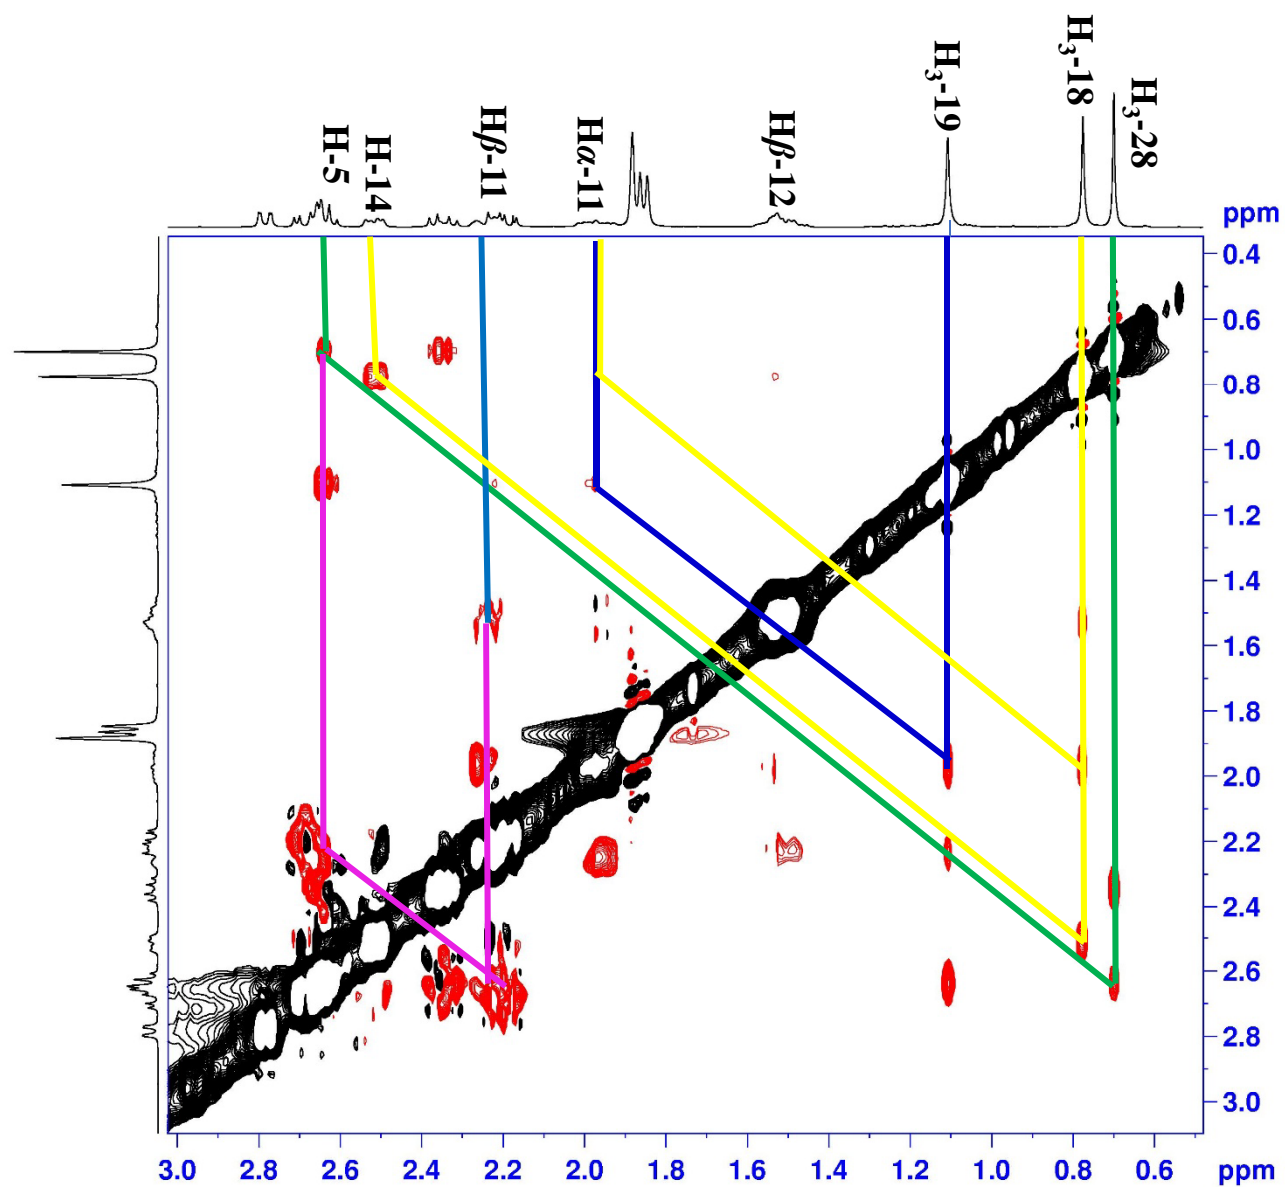

Supplement: s1 [file s1]
